# Supplementary material for: Fourier Transform Infrared with Attenuated Total Reflectance Applied to the Discrimination of Freshwater Planktonic Coccoid Green Microalgae
Source: PLoS One. 2014 Dec 26;9(12):e114458. doi: 10.1371/journal.pone.0114458 (PMC4277285; doi:10.1371/journal.pone.0114458)
Supplement: S9 Data — Raw data and its 9-point first derivative presented in .xlsx file for strain Micrasterias pinnatifida (089). (XLSX) [file pone.0114458.s011.xlsx]

## Sheet: FTIR raw
	089_1.1	089_1.2	089_1.3	089_1.4	089_2.1	089_2.2	089_2.3	089_2.4	089_3.1	089_3.2	089_3.3	089_3.4
628.794	0.624617	0.635413	0.644464	0.633704	0.654559	0.696499	0.620821	0.666153	0.617317	0.614128	0.604605	0.544752
630.723	0.62574	0.643498	0.651553	0.635389	0.671427	0.712351	0.637188	0.658431	0.625122	0.630324	0.611223	0.574254
632.652	0.638511	0.654649	0.649494	0.634361	0.686901	0.690195	0.648981	0.668103	0.6251	0.639927	0.603559	0.602759
634.58	0.658616	0.652356	0.655752	0.618446	0.695322	0.691857	0.644014	0.695919	0.619908	0.639373	0.600143	0.609952
636.509	0.662771	0.6493	0.644852	0.610808	0.690651	0.696854	0.642372	0.709369	0.624408	0.621426	0.582439	0.59575
638.438	0.663481	0.654366	0.640719	0.615473	0.681522	0.70046	0.661032	0.689921	0.617652	0.622633	0.579512	0.580916
640.367	0.660112	0.651625	0.652659	0.62301	0.677454	0.702409	0.671322	0.681903	0.621012	0.618648	0.590041	0.571883
642.296	0.652701	0.650111	0.653629	0.633691	0.678516	0.702408	0.675201	0.692631	0.6306	0.616639	0.593719	0.566604
644.225	0.65184	0.651905	0.649341	0.636276	0.688644	0.705792	0.671748	0.702613	0.632461	0.622045	0.590985	0.575428
646.153	0.649781	0.657782	0.642546	0.63379	0.69274	0.703672	0.672675	0.700721	0.625786	0.619306	0.593301	0.580991
648.082	0.64915	0.655812	0.639815	0.629648	0.690734	0.69604	0.682184	0.698873	0.623279	0.617485	0.598514	0.577875
650.011	0.651015	0.65045	0.637878	0.630207	0.688584	0.692551	0.681271	0.699832	0.625573	0.614161	0.599822	0.577582
651.94	0.654111	0.645658	0.634943	0.629002	0.688011	0.696901	0.678736	0.694586	0.623708	0.611303	0.599637	0.576926
653.869	0.653101	0.647949	0.634372	0.627089	0.690385	0.698085	0.681804	0.693589	0.624592	0.615307	0.59892	0.575893
655.797	0.651241	0.651317	0.637044	0.630338	0.694235	0.69924	0.682154	0.693678	0.624876	0.616941	0.59817	0.574448
657.726	0.652453	0.650226	0.63942	0.632341	0.695699	0.702986	0.68566	0.693501	0.626821	0.619019	0.599749	0.575943
659.655	0.653313	0.65146	0.643881	0.635083	0.695175	0.702847	0.691826	0.698152	0.628597	0.623648	0.601069	0.579598
661.584	0.655964	0.654687	0.647766	0.637759	0.696797	0.705787	0.695839	0.699451	0.630251	0.627282	0.602754	0.582686
663.513	0.658494	0.657578	0.64853	0.637899	0.698298	0.706747	0.697333	0.698301	0.634144	0.628215	0.605032	0.583882
665.442	0.663467	0.660315	0.650973	0.641506	0.700161	0.708177	0.700299	0.702537	0.636525	0.629928	0.608686	0.585887
667.37	0.660247	0.657841	0.647458	0.642948	0.696358	0.706951	0.698869	0.702551	0.63222	0.628599	0.609701	0.583796
669.299	0.652106	0.650685	0.641221	0.635418	0.691284	0.700453	0.692343	0.695286	0.628653	0.619813	0.604611	0.577666
671.228	0.653964	0.651525	0.64199	0.632674	0.693065	0.700903	0.693023	0.694698	0.630134	0.618875	0.603622	0.578502
673.157	0.651325	0.649833	0.639154	0.630578	0.690793	0.697944	0.690926	0.690804	0.625054	0.6168	0.599759	0.576323
675.086	0.64749	0.646183	0.635055	0.627333	0.686323	0.693538	0.686391	0.685762	0.619903	0.612642	0.595837	0.572204
677.014	0.643428	0.641428	0.630121	0.62318	0.681384	0.688849	0.681854	0.68162	0.616969	0.608762	0.591477	0.567675
678.943	0.638278	0.63628	0.625484	0.619734	0.676875	0.684105	0.679213	0.677765	0.612846	0.605863	0.587703	0.56401
680.872	0.633983	0.63204	0.623547	0.615396	0.674037	0.680965	0.67552	0.674803	0.609055	0.601617	0.584168	0.56087
682.801	0.631864	0.629541	0.621147	0.611489	0.67257	0.677716	0.670534	0.672442	0.607081	0.597693	0.580955	0.557736
684.73	0.629907	0.62723	0.617916	0.610072	0.670399	0.674391	0.668108	0.669444	0.605253	0.595962	0.578988	0.555486
686.658	0.628053	0.625674	0.61626	0.609506	0.66816	0.672999	0.66722	0.66827	0.605283	0.595629	0.577524	0.555157
688.587	0.628538	0.625165	0.615268	0.608886	0.66867	0.67272	0.66679	0.667903	0.606075	0.595923	0.577457	0.55573
690.516	0.628894	0.625709	0.615859	0.609759	0.669832	0.672925	0.667478	0.667381	0.605906	0.597043	0.578124	0.557144
692.445	0.630266	0.628136	0.618378	0.611766	0.67017	0.674239	0.668905	0.668537	0.607871	0.599178	0.58056	0.559695
694.374	0.633705	0.630858	0.62091	0.614151	0.671452	0.676203	0.670333	0.670827	0.610909	0.602047	0.583376	0.562416
696.303	0.636922	0.63378	0.623813	0.616196	0.673551	0.677742	0.672361	0.673345	0.614079	0.605361	0.585687	0.565006
698.231	0.639114	0.636022	0.626455	0.618188	0.675196	0.678868	0.674818	0.675197	0.617156	0.607316	0.587999	0.567067
700.16	0.639811	0.636825	0.627421	0.619859	0.675463	0.679053	0.674693	0.675066	0.618431	0.607542	0.588975	0.567849
702.089	0.639333	0.636396	0.62691	0.619501	0.674272	0.678114	0.672924	0.672972	0.617112	0.607186	0.587382	0.567123
704.018	0.637162	0.634101	0.624859	0.617163	0.671833	0.675189	0.670292	0.670681	0.614811	0.604921	0.584843	0.565192
705.947	0.633293	0.630339	0.62116	0.613907	0.667988	0.670274	0.665402	0.666665	0.610809	0.600217	0.581179	0.561671
707.875	0.629005	0.626336	0.616724	0.609594	0.662524	0.664561	0.6598	0.66132	0.604991	0.594898	0.576235	0.55699
709.804	0.624172	0.621649	0.611566	0.604247	0.657099	0.658846	0.654805	0.65619	0.599247	0.589408	0.570902	0.552009
711.733	0.618097	0.615533	0.605701	0.598383	0.651505	0.653115	0.649349	0.649803	0.59393	0.583561	0.565115	0.546765
713.662	0.611588	0.608316	0.599375	0.591794	0.644654	0.646657	0.64276	0.642735	0.588101	0.577623	0.559028	0.541047
715.591	0.604701	0.600784	0.592752	0.585328	0.637388	0.639469	0.63573	0.635725	0.581069	0.570627	0.552513	0.534612
717.52	0.597245	0.593296	0.586042	0.578489	0.63073	0.631973	0.628716	0.628526	0.573952	0.563751	0.546166	0.528391
719.448	0.589248	0.585391	0.577892	0.57062	0.623369	0.6244	0.621156	0.620551	0.566174	0.556253	0.539323	0.521135
721.377	0.580225	0.575967	0.568027	0.561224	0.613995	0.615431	0.611909	0.611671	0.556875	0.547058	0.530594	0.512361
723.306	0.570032	0.565761	0.557892	0.550859	0.604121	0.605534	0.602002	0.602447	0.547041	0.537216	0.521036	0.50372
725.235	0.559326	0.555633	0.548131	0.540413	0.594391	0.595801	0.591895	0.592377	0.537356	0.527095	0.511319	0.494375
727.164	0.549368	0.54603	0.538623	0.530878	0.585492	0.586637	0.582339	0.583236	0.528097	0.51768	0.502397	0.485664
729.092	0.540882	0.537268	0.530122	0.522774	0.577799	0.579105	0.574869	0.575795	0.520348	0.509396	0.494718	0.47863
731.021	0.534204	0.530394	0.523263	0.515814	0.571069	0.572915	0.56889	0.569653	0.513985	0.503176	0.488086	0.472521
732.95	0.528781	0.52554	0.518142	0.510796	0.566041	0.568025	0.564009	0.565022	0.508389	0.498772	0.482998	0.46784
734.879	0.524775	0.521765	0.514492	0.507312	0.563018	0.564652	0.560182	0.561707	0.505105	0.495217	0.479852	0.464951
736.808	0.522091	0.519055	0.511577	0.504756	0.561274	0.562256	0.558248	0.559581	0.502977	0.492494	0.478393	0.463086
738.737	0.520088	0.516838	0.509616	0.502646	0.559675	0.560381	0.557071	0.558293	0.501168	0.49097	0.476796	0.461584
740.665	0.518189	0.514119	0.507858	0.500346	0.557688	0.558253	0.55486	0.556253	0.499145	0.488996	0.474558	0.459689
742.594	0.515514	0.511526	0.505239	0.497696	0.554802	0.555418	0.551701	0.553034	0.495928	0.485865	0.471918	0.457098
744.523	0.511793	0.508392	0.501779	0.494276	0.551348	0.551977	0.547792	0.549625	0.49218	0.48262	0.468665	0.453877
746.452	0.508123	0.504474	0.498094	0.490735	0.5477	0.548108	0.544203	0.545931	0.488162	0.47848	0.464679	0.449721
748.381	0.505166	0.501273	0.494954	0.487959	0.544458	0.544602	0.541385	0.542714	0.484085	0.474416	0.461237	0.446417
750.309	0.502514	0.499143	0.492513	0.485749	0.541658	0.541852	0.538691	0.540213	0.480442	0.471786	0.458654	0.444224
752.238	0.501091	0.497653	0.491062	0.484098	0.539189	0.539742	0.536435	0.537724	0.478346	0.469955	0.456533	0.442194
754.167	0.500249	0.496577	0.490281	0.483003	0.537262	0.538065	0.534883	0.53594	0.47715	0.468468	0.455005	0.441052
756.096	0.499233	0.495848	0.489775	0.482405	0.535522	0.536616	0.533797	0.535163	0.475847	0.467527	0.454059	0.440514
758.025	0.497949	0.494774	0.48884	0.481772	0.533579	0.534657	0.532178	0.53442	0.473891	0.466072	0.452763	0.439177
759.954	0.496408	0.493674	0.487579	0.480953	0.531898	0.532992	0.530602	0.533401	0.471647	0.464018	0.45093	0.437624
761.882	0.495423	0.492897	0.486822	0.480026	0.530904	0.532312	0.529764	0.53224	0.470008	0.46254	0.449748	0.436512
763.811	0.494888	0.491982	0.486168	0.479156	0.530378	0.531905	0.52924	0.531771	0.469126	0.461674	0.449113	0.43557
765.74	0.493609	0.49054	0.484651	0.477908	0.529572	0.530488	0.528127	0.530871	0.4675	0.459778	0.44763	0.434302
767.669	0.490831	0.487385	0.481766	0.474849	0.527356	0.528312	0.52562	0.528449	0.464574	0.456535	0.444616	0.43178
769.598	0.486548	0.4826	0.47743	0.470756	0.523911	0.52557	0.522294	0.52465	0.460907	0.452758	0.440726	0.428124
771.526	0.481713	0.478023	0.472897	0.466626	0.520172	0.52164	0.51874	0.5205	0.456837	0.448687	0.436691	0.424132
773.455	0.476696	0.473469	0.468277	0.46168	0.516539	0.517531	0.515005	0.516795	0.452704	0.44498	0.433066	0.420472
775.384	0.472017	0.469161	0.463309	0.457119	0.512901	0.514144	0.511364	0.513313	0.448887	0.441082	0.429703	0.416999
777.313	0.468172	0.465053	0.459146	0.453046	0.509779	0.51106	0.508219	0.510214	0.445637	0.437769	0.426352	0.413846
779.242	0.464627	0.46117	0.455528	0.449259	0.507212	0.507946	0.505	0.507255	0.442496	0.435013	0.42329	0.410895
781.17	0.460802	0.457668	0.451997	0.446068	0.504741	0.5051	0.502502	0.504606	0.439573	0.431756	0.42068	0.407847
783.099	0.457488	0.454655	0.449041	0.443083	0.502452	0.503218	0.500651	0.502532	0.437106	0.429023	0.418547	0.405523
785.028	0.455409	0.452905	0.44713	0.440948	0.500447	0.502057	0.49904	0.501043	0.435391	0.427551	0.416811	0.404218
786.957	0.45423	0.451839	0.445859	0.439805	0.499542	0.500981	0.49823	0.499883	0.434112	0.426669	0.41553	0.403225
788.886	0.453411	0.450968	0.445106	0.439207	0.499192	0.500146	0.497499	0.499121	0.433346	0.426269	0.415005	0.402577
790.815	0.452599	0.450346	0.444613	0.438761	0.498368	0.499221	0.49639	0.498655	0.433017	0.426103	0.414901	0.402268
792.743	0.451967	0.449835	0.443825	0.437839	0.497485	0.498235	0.495163	0.497408	0.432685	0.425457	0.414262	0.401653
794.672	0.45038	0.448188	0.442315	0.436	0.495727	0.496491	0.493297	0.49538	0.431423	0.423901	0.412887	0.400046
796.601	0.447132	0.445086	0.438864	0.433014	0.492622	0.493316	0.490298	0.492615	0.428177	0.420909	0.410147	0.397408
798.53	0.441776	0.440281	0.433822	0.428002	0.487763	0.488265	0.48571	0.488385	0.423011	0.41634	0.405529	0.393132
800.459	0.435196	0.43398	0.427975	0.421748	0.481955	0.482638	0.480067	0.482918	0.416545	0.410417	0.399712	0.387491
802.387	0.429191	0.427775	0.422139	0.415868	0.476813	0.477822	0.475202	0.477612	0.410462	0.404468	0.39436	0.38232
804.316	0.424168	0.422572	0.417116	0.410951	0.472519	0.473831	0.471276	0.473852	0.405531	0.399811	0.390059	0.378162
806.245	0.420086	0.418578	0.413222	0.407338	0.4695	0.470813	0.468344	0.471313	0.40163	0.396439	0.386916	0.374921
808.174	0.416747	0.41518	0.409935	0.404264	0.467231	0.468709	0.4661	0.469182	0.398767	0.393467	0.384856	0.372571
810.103	0.413836	0.412235	0.407133	0.401497	0.465394	0.466922	0.464148	0.467307	0.396356	0.390978	0.382599	0.370709
812.032	0.41122	0.409657	0.404931	0.399057	0.46343	0.465064	0.462512	0.465449	0.393916	0.389074	0.380378	0.36876
813.96	0.408643	0.407232	0.402366	0.396499	0.4614	0.463097	0.46074	0.463865	0.391408	0.386869	0.37846	0.366631
815.889	0.405885	0.404557	0.399709	0.393938	0.459507	0.460698	0.458622	0.461964	0.388998	0.384461	0.376407	0.364628
817.818	0.403257	0.401878	0.397431	0.391646	0.457328	0.458484	0.456374	0.459726	0.386559	0.382382	0.37436	0.362941
819.747	0.401254	0.399504	0.395283	0.389797	0.455041	0.456609	0.454098	0.457806	0.384251	0.380479	0.37265	0.361229
821.676	0.399503	0.397655	0.39355	0.387883	0.452846	0.454724	0.451969	0.455862	0.382857	0.37894	0.371033	0.359877
823.604	0.397367	0.395798	0.391886	0.386215	0.450531	0.452393	0.450184	0.453794	0.381357	0.377686	0.369563	0.358685
825.533	0.395227	0.393888	0.390168	0.384822	0.448556	0.450168	0.448186	0.451834	0.379611	0.376235	0.368535	0.357381
827.462	0.393316	0.392454	0.388386	0.383	0.446606	0.44846	0.445893	0.45023	0.378384	0.374687	0.367454	0.356098
829.391	0.392005	0.391398	0.387195	0.381717	0.444605	0.446795	0.443898	0.448773	0.377354	0.373845	0.366579	0.355129
831.32	0.391403	0.390704	0.38671	0.381225	0.443045	0.445144	0.442439	0.447209	0.37691	0.373524	0.36603	0.354692
833.249	0.391226	0.390522	0.386306	0.381006	0.441796	0.443858	0.441483	0.446147	0.376785	0.373258	0.365806	0.354555
835.177	0.391207	0.390369	0.386245	0.380885	0.440776	0.443005	0.44052	0.445323	0.376105	0.373074	0.365873	0.354459
837.106	0.391149	0.390306	0.386354	0.38105	0.439669	0.442233	0.439615	0.444574	0.375776	0.373199	0.365936	0.354412
839.035	0.391243	0.39052	0.386446	0.381292	0.439049	0.441435	0.438799	0.444291	0.375796	0.373405	0.365783	0.354515
840.964	0.391403	0.390753	0.386636	0.381407	0.438775	0.440976	0.438271	0.444092	0.37571	0.373391	0.36576	0.354848
842.893	0.391593	0.391418	0.387058	0.381849	0.438511	0.440783	0.438382	0.444191	0.375978	0.373655	0.366307	0.355293
844.821	0.392378	0.392242	0.387963	0.382914	0.438644	0.44096	0.438839	0.444496	0.376693	0.374415	0.367059	0.355881
846.75	0.393633	0.393297	0.389191	0.384149	0.439021	0.44164	0.439271	0.44511	0.37754	0.375578	0.368047	0.356778
848.679	0.394946	0.394583	0.390418	0.385083	0.43962	0.442342	0.439727	0.446128	0.378309	0.376754	0.369073	0.357843
850.608	0.395763	0.395667	0.391613	0.38587	0.440148	0.442747	0.440352	0.446648	0.379161	0.377446	0.369803	0.358497
852.537	0.396542	0.396577	0.392446	0.38674	0.440508	0.442869	0.440908	0.446704	0.379822	0.378012	0.370494	0.358935
854.465	0.39769	0.39749	0.393317	0.387962	0.441037	0.443415	0.441356	0.447119	0.380544	0.379024	0.371192	0.359721
856.394	0.398938	0.398947	0.394676	0.389469	0.441965	0.444487	0.442276	0.448029	0.38181	0.380277	0.372316	0.360823
858.323	0.400958	0.400987	0.396676	0.391285	0.44331	0.44599	0.443471	0.44936	0.383354	0.381831	0.373956	0.362403
860.252	0.402953	0.402652	0.398576	0.393094	0.444393	0.447299	0.444482	0.450563	0.384663	0.383078	0.375561	0.363818
862.181	0.403238	0.402956	0.399169	0.393541	0.444808	0.447783	0.445119	0.450862	0.384922	0.38315	0.376081	0.364339
864.11	0.401664	0.401626	0.397697	0.392049	0.444371	0.447522	0.444861	0.450284	0.383979	0.382346	0.37502	0.363674
866.038	0.398757	0.398762	0.394587	0.389149	0.443016	0.446137	0.443664	0.449086	0.38193	0.380627	0.37305	0.362004
867.967	0.394743	0.394803	0.390808	0.385356	0.441437	0.444298	0.442007	0.447491	0.378787	0.377801	0.370684	0.359618
869.896	0.390528	0.391008	0.386841	0.381728	0.439916	0.442902	0.440378	0.446257	0.375899	0.374703	0.368292	0.357425
871.825	0.386977	0.387736	0.383486	0.378565	0.438698	0.441897	0.439359	0.445419	0.373517	0.372497	0.36643	0.355577
873.754	0.384352	0.385101	0.381034	0.375939	0.438191	0.441402	0.439039	0.445047	0.371986	0.371176	0.365268	0.354125
875.682	0.382724	0.383621	0.379405	0.3744	0.438349	0.441736	0.43911	0.445396	0.371394	0.370615	0.364707	0.353613
877.611	0.382042	0.382966	0.378672	0.373869	0.438898	0.442304	0.439967	0.446271	0.371279	0.370847	0.364984	0.353804
879.54	0.382184	0.383081	0.378847	0.374083	0.439889	0.443258	0.44115	0.447464	0.37192	0.371687	0.365742	0.354428
881.469	0.382962	0.384225	0.379681	0.374803	0.441377	0.444658	0.44219	0.448962	0.372936	0.373016	0.367085	0.355864
883.398	0.384598	0.385751	0.381478	0.376386	0.442955	0.446292	0.443814	0.451201	0.374904	0.374998	0.369235	0.358082
885.327	0.386822	0.387773	0.38401	0.378635	0.445189	0.448781	0.44633	0.453774	0.377374	0.377691	0.371648	0.360351
887.255	0.389279	0.390568	0.386751	0.381512	0.448065	0.451719	0.449233	0.456601	0.380042	0.380735	0.37443	0.362924
889.184	0.392323	0.393599	0.389511	0.384611	0.450815	0.454687	0.452475	0.459911	0.382931	0.383719	0.377502	0.36587
891.113	0.395329	0.396726	0.392239	0.387516	0.454177	0.457986	0.455798	0.463168	0.385777	0.386641	0.380291	0.368852
893.042	0.398196	0.399928	0.39522	0.390612	0.457736	0.461458	0.45901	0.466352	0.388827	0.389721	0.383086	0.371459
894.971	0.401058	0.402947	0.398188	0.393495	0.460701	0.464678	0.462425	0.469803	0.391679	0.39272	0.386004	0.374297
896.899	0.403768	0.405452	0.400786	0.396001	0.463259	0.467453	0.465375	0.473094	0.394109	0.395288	0.38857	0.376918
898.828	0.406246	0.407849	0.403212	0.398339	0.465472	0.469872	0.467911	0.475655	0.396289	0.397555	0.391106	0.378982
900.757	0.408453	0.410101	0.405634	0.400609	0.46782	0.472157	0.470126	0.478006	0.39844	0.399879	0.393375	0.381171
902.686	0.410988	0.412666	0.408316	0.403168	0.470322	0.474552	0.472347	0.480756	0.400865	0.402361	0.395476	0.383317
904.615	0.414151	0.41603	0.411559	0.406437	0.473394	0.477424	0.47528	0.48364	0.403522	0.4052	0.398145	0.385991
906.544	0.418103	0.419914	0.415333	0.410621	0.477266	0.481386	0.479084	0.487434	0.407091	0.408822	0.401642	0.389537
908.472	0.422838	0.424723	0.419905	0.415223	0.481633	0.486015	0.483588	0.492292	0.411498	0.413198	0.405624	0.39363
910.401	0.428224	0.430333	0.425238	0.420207	0.486534	0.490727	0.48839	0.497206	0.416248	0.417862	0.410113	0.397855
912.33	0.433745	0.436013	0.430776	0.425493	0.491235	0.495563	0.493221	0.501825	0.420906	0.422452	0.414667	0.402244
914.259	0.43913	0.441094	0.43607	0.430642	0.495655	0.500044	0.497685	0.505828	0.425154	0.426989	0.419025	0.406595
916.188	0.44423	0.445871	0.440885	0.435456	0.499301	0.503717	0.501358	0.509388	0.429035	0.430762	0.422689	0.410078
918.116	0.448218	0.450067	0.444834	0.439568	0.501782	0.506535	0.504382	0.512378	0.431937	0.433457	0.425244	0.412881
920.045	0.451148	0.453039	0.447889	0.442773	0.503929	0.508318	0.506393	0.514649	0.433779	0.435509	0.427328	0.415072
921.974	0.453344	0.454965	0.45008	0.444831	0.505617	0.50948	0.507555	0.516304	0.434872	0.43662	0.428673	0.416349
923.903	0.454523	0.456115	0.451278	0.446071	0.50646	0.510274	0.508603	0.517268	0.435389	0.437088	0.429291	0.417119
925.832	0.455437	0.456847	0.451847	0.446656	0.506651	0.511164	0.50925	0.517868	0.435534	0.437343	0.429542	0.417288
927.76	0.456207	0.457429	0.45229	0.447152	0.507048	0.512229	0.509986	0.518536	0.435567	0.437287	0.429529	0.417102
929.689	0.456596	0.458208	0.452866	0.447957	0.508094	0.512991	0.511055	0.519533	0.435851	0.437456	0.429733	0.417461
931.618	0.456975	0.458958	0.453533	0.448911	0.509503	0.514022	0.51226	0.520851	0.436513	0.438262	0.430212	0.418184
933.547	0.457519	0.459422	0.454096	0.449562	0.510644	0.515533	0.513679	0.522166	0.437029	0.438986	0.430731	0.418902
935.476	0.457983	0.459957	0.454763	0.449978	0.512281	0.517229	0.515302	0.524034	0.437653	0.439756	0.431666	0.41968
937.405	0.4583	0.460405	0.455141	0.450466	0.514818	0.519364	0.517464	0.526421	0.438454	0.440714	0.432706	0.420312
939.333	0.458704	0.460694	0.455447	0.450767	0.5175	0.52187	0.520088	0.529195	0.439346	0.44185	0.433781	0.421525
941.262	0.458729	0.461026	0.455763	0.450812	0.520475	0.524735	0.523075	0.532442	0.440192	0.443261	0.435193	0.423191
943.191	0.458808	0.46135	0.456014	0.450962	0.524022	0.528466	0.526981	0.536157	0.441572	0.444712	0.436907	0.424865
945.12	0.459764	0.46262	0.457109	0.452248	0.528848	0.533595	0.531922	0.540895	0.44422	0.446904	0.43951	0.427298
947.049	0.462644	0.465466	0.459883	0.455194	0.535438	0.540256	0.538163	0.54732	0.447991	0.450895	0.443393	0.431066
948.977	0.467638	0.470322	0.464721	0.45988	0.543705	0.548445	0.546217	0.555662	0.453362	0.456933	0.448737	0.436508
950.906	0.474722	0.477615	0.471543	0.466737	0.553704	0.55841	0.55617	0.56564	0.460895	0.46488	0.456479	0.443849
952.835	0.484307	0.487261	0.48064	0.475884	0.565504	0.570443	0.568085	0.577344	0.470525	0.474377	0.466129	0.452852
954.764	0.495765	0.499031	0.491871	0.486958	0.579221	0.584426	0.581977	0.591138	0.482339	0.486131	0.477198	0.463726
956.693	0.509081	0.512439	0.504773	0.499881	0.594838	0.599944	0.597392	0.606677	0.495712	0.499897	0.490078	0.476364
958.622	0.523739	0.527366	0.519017	0.514328	0.612028	0.617115	0.614246	0.623573	0.510285	0.514662	0.50432	0.490044
960.55	0.539457	0.543156	0.534297	0.529739	0.629631	0.635183	0.632042	0.641117	0.526076	0.530356	0.519334	0.504776
962.479	0.555949	0.559408	0.550072	0.54564	0.646947	0.653023	0.649691	0.658598	0.542206	0.546285	0.534681	0.519802
964.408	0.571917	0.575409	0.565532	0.561154	0.664048	0.669904	0.666497	0.676209	0.55773	0.561817	0.549826	0.534423
966.337	0.587853	0.591051	0.580946	0.576506	0.680551	0.686062	0.682469	0.692744	0.573067	0.577264	0.564586	0.548958
968.266	0.603805	0.607156	0.596936	0.592037	0.696664	0.701995	0.698569	0.708587	0.588505	0.592536	0.579444	0.563645
970.194	0.620167	0.623811	0.613341	0.607984	0.712759	0.718401	0.714637	0.725095	0.604077	0.608349	0.594943	0.578354
972.123	0.637876	0.641734	0.630651	0.625555	0.729739	0.735934	0.731706	0.742793	0.620686	0.625596	0.611574	0.5942
974.052	0.658285	0.662128	0.650873	0.645808	0.748911	0.755394	0.751627	0.762495	0.639527	0.64466	0.630231	0.612277
975.981	0.683326	0.686619	0.675065	0.66975	0.771231	0.777867	0.774641	0.785241	0.662048	0.6673	0.65259	0.633597
977.91	0.712986	0.71641	0.703845	0.698657	0.797672	0.804394	0.801377	0.812608	0.68921	0.695079	0.679515	0.659733
979.839	0.747272	0.751116	0.737555	0.732504	0.827837	0.835222	0.83134	0.843614	0.721245	0.727822	0.710849	0.690372
981.767	0.784611	0.788333	0.77389	0.768939	0.860191	0.867906	0.86323	0.875617	0.756207	0.762965	0.745024	0.72343
983.696	0.8198	0.822873	0.808148	0.803053	0.889753	0.897358	0.89259	0.904448	0.789552	0.795931	0.776988	0.754537
985.625	0.848519	0.851596	0.83647	0.831211	0.912928	0.920933	0.91611	0.927881	0.816399	0.822594	0.802718	0.779398
987.554	0.873151	0.876673	0.86064	0.855701	0.932296	0.940752	0.935902	0.947738	0.838467	0.844786	0.823766	0.799957
989.483	0.898336	0.901347	0.885365	0.880558	0.952207	0.960333	0.955181	0.967033	0.861109	0.866955	0.845107	0.820906
991.411	0.924975	0.928025	0.912041	0.907472	0.974369	0.982317	0.976566	0.988563	0.885544	0.891281	0.868681	0.844734
993.34	0.953021	0.95637	0.940732	0.936225	0.997439	1.00591	0.999618	1.01181	0.911982	0.917519	0.894181	0.870176
995.269	0.981339	0.984143	0.968889	0.964178	1.02032	1.02954	1.02224	1.03503	0.938438	0.943773	0.920522	0.895513
997.198	1.00723	1.00963	0.9939	0.989259	1.04123	1.05097	1.04362	1.05613	0.963127	0.968357	0.945176	0.919604
999.127	1.02919	1.03164	1.0155	1.01082	1.05886	1.06841	1.06151	1.07404	0.984619	0.989148	0.965706	0.940047
1001.06	1.04513	1.04803	1.03116	1.0272	1.07239	1.08205	1.07424	1.08735	1.00043	1.00549	0.981572	0.95581
1002.98	1.05626	1.05898	1.04219	1.0389	1.08138	1.0922	1.08425	1.09682	1.01151	1.01764	0.992785	0.967367
1004.91	1.06625	1.06864	1.05219	1.04912	1.08935	1.10079	1.09308	1.10538	1.02088	1.02756	1.00208	0.977257
1006.84	1.07769	1.08106	1.06429	1.06114	1.10066	1.11114	1.10366	1.11621	1.0325	1.0391	1.01432	0.988335
1008.77	1.09349	1.09752	1.07986	1.0771	1.11596	1.12628	1.11878	1.13108	1.04833	1.05441	1.03092	1.00416
1010.7	1.11266	1.11644	1.09847	1.09638	1.13399	1.1446	1.13659	1.1489	1.06822	1.07334	1.04989	1.02321
1012.63	1.13134	1.13516	1.11764	1.11549	1.15142	1.16162	1.15356	1.16706	1.08793	1.09396	1.06872	1.0425
1014.56	1.14488	1.14848	1.1313	1.12878	1.1643	1.17451	1.1665	1.18018	1.10203	1.10917	1.08343	1.05789
1016.49	1.15269	1.15667	1.13988	1.13753	1.17253	1.18292	1.1749	1.18799	1.11132	1.11727	1.09234	1.06698
1018.41	1.15849	1.16315	1.14564	1.1438	1.17913	1.18919	1.18126	1.19355	1.11826	1.12319	1.09878	1.07271
1020.34	1.164	1.16982	1.15094	1.14929	1.18432	1.1956	1.18748	1.19932	1.1238	1.13005	1.1046	1.07884
1022.27	1.16981	1.17678	1.157	1.15616	1.18987	1.20294	1.19388	1.20629	1.12999	1.13739	1.11165	1.08711
1024.2	1.17829	1.18371	1.16432	1.164	1.1982	1.21087	1.2011	1.21393	1.13864	1.14499	1.12102	1.09652
1026.13	1.1885	1.19357	1.17429	1.17392	1.20823	1.2206	1.21119	1.22366	1.14878	1.15467	1.13203	1.10727
1028.06	1.20032	1.20666	1.18666	1.18575	1.22094	1.23257	1.22371	1.23649	1.16105	1.16877	1.14635	1.12101
1029.99	1.21356	1.22052	1.20097	1.19907	1.23442	1.24537	1.23586	1.25028	1.1761	1.18544	1.1639	1.13743
1031.92	1.22522	1.23253	1.21252	1.21066	1.24501	1.25725	1.24598	1.26156	1.1899	1.19841	1.17892	1.15207
1033.85	1.22914	1.23714	1.21657	1.21458	1.24939	1.26234	1.25029	1.26498	1.19605	1.20429	1.18465	1.15911
1035.77	1.22084	1.22911	1.20872	1.20629	1.24231	1.25421	1.24333	1.25754	1.18934	1.19884	1.17715	1.15296
1037.7	1.20329	1.20998	1.18963	1.18682	1.22465	1.23665	1.22532	1.24017	1.1712	1.18174	1.15885	1.13427
1039.63	1.18154	1.1869	1.16585	1.16457	1.20314	1.21516	1.20346	1.21767	1.14826	1.15838	1.13529	1.10901
1041.56	1.16284	1.16713	1.14554	1.14484	1.18431	1.19463	1.18498	1.19798	1.12756	1.13716	1.11324	1.08635
1043.49	1.15092	1.15503	1.13368	1.13232	1.17144	1.18096	1.17279	1.18515	1.1135	1.12397	1.09904	1.07287
1045.42	1.14783	1.15294	1.1316	1.13086	1.16708	1.17679	1.16893	1.18172	1.10971	1.12001	1.09499	1.06947
1047.35	1.15333	1.1588	1.137	1.13636	1.16934	1.18113	1.17244	1.18591	1.11537	1.12408	1.10052	1.07433
1049.28	1.16492	1.17028	1.14862	1.14764	1.17812	1.19124	1.18187	1.1963	1.12667	1.13628	1.11355	1.08708
1051.2	1.18032	1.18564	1.16513	1.16319	1.19269	1.20527	1.19635	1.21104	1.14245	1.15288	1.13125	1.10505
1053.13	1.1946	1.2009	1.18021	1.17755	1.20766	1.22088	1.21143	1.22602	1.15965	1.16908	1.1502	1.12317
1055.06	1.20215	1.20947	1.18841	1.18518	1.21672	1.23012	1.2203	1.23514	1.17101	1.18003	1.16332	1.13514
1056.99	1.20137	1.20856	1.189	1.18425	1.21809	1.2303	1.22147	1.23638	1.1724	1.18234	1.16648	1.13851
1058.92	1.18745	1.19558	1.17605	1.17067	1.20855	1.2209	1.21143	1.22656	1.16122	1.17233	1.15539	1.12841
1060.85	1.15785	1.16617	1.14559	1.1407	1.18295	1.19586	1.1862	1.20019	1.13416	1.14561	1.12754	1.09932
1062.78	1.11611	1.12332	1.10153	1.09787	1.14451	1.15692	1.1484	1.16091	1.09283	1.104	1.08539	1.05682
1064.71	1.07452	1.08056	1.05805	1.05526	1.10596	1.11762	1.11011	1.12104	1.05037	1.06128	1.04087	1.01404
1066.64	1.04094	1.04707	1.02441	1.02183	1.07595	1.0859	1.07907	1.08937	1.01701	1.02744	1.00571	0.979492
1068.56	1.0193	1.02548	1.00252	1.00053	1.05548	1.06417	1.05706	1.06743	0.995028	1.0044	0.981506	0.955769
1070.49	1.0077	1.0137	0.990863	0.989215	1.0418	1.05016	1.04348	1.05286	0.981587	0.990351	0.965895	0.941573
1072.42	1.00143	1.0085	0.984994	0.983594	1.03244	1.04066	1.03335	1.0426	0.973862	0.981368	0.956674	0.933246
1074.35	0.996162	1.00231	0.979313	0.977513	1.02289	1.03056	1.0228	1.03191	0.966263	0.972922	0.948128	0.925102
1076.28	0.985958	0.989933	0.968574	0.966641	1.00814	1.01569	1.00834	1.01739	0.952576	0.959623	0.934937	0.912495
1078.21	0.968869	0.972168	0.951583	0.950031	0.98808	0.996045	0.988749	0.997358	0.933726	0.940639	0.916206	0.89421
1080.14	0.947481	0.951427	0.93089	0.929471	0.965418	0.97279	0.966487	0.974762	0.912568	0.918321	0.894275	0.872534
1082.07	0.925604	0.930086	0.909193	0.907858	0.942842	0.949239	0.943862	0.952427	0.891002	0.896227	0.872249	0.85042
1083.99	0.90424	0.90891	0.888311	0.886714	0.921649	0.927798	0.922566	0.931154	0.87011	0.875064	0.851007	0.829374
1085.92	0.884086	0.888456	0.868649	0.867323	0.901778	0.908159	0.903256	0.911433	0.849892	0.85516	0.831422	0.810426
1087.85	0.865634	0.869345	0.849981	0.849027	0.883473	0.889864	0.885579	0.89367	0.831358	0.83735	0.814161	0.793356
1089.78	0.849344	0.852677	0.833354	0.832483	0.867684	0.874151	0.869936	0.877895	0.815172	0.821565	0.79925	0.778448
1091.71	0.836056	0.839985	0.820338	0.819699	0.855046	0.861166	0.857422	0.865433	0.802637	0.809274	0.787144	0.766492
1093.64	0.82708	0.83188	0.812105	0.81134	0.846031	0.852292	0.848937	0.857542	0.794676	0.80088	0.779687	0.758754
1095.57	0.824042	0.828703	0.809116	0.808016	0.841934	0.848771	0.845501	0.854601	0.791382	0.7977	0.777441	0.756497
1097.5	0.825872	0.83077	0.811636	0.80993	0.842564	0.849717	0.846625	0.856149	0.793111	0.800072	0.779526	0.758647
1099.43	0.831512	0.83713	0.817839	0.815921	0.846523	0.854078	0.851337	0.860996	0.798698	0.806261	0.785377	0.764397
1101.35	0.838845	0.845055	0.825682	0.823358	0.852484	0.859907	0.857548	0.867778	0.806075	0.813762	0.792799	0.771702
1103.28	0.844355	0.850967	0.831689	0.828841	0.85695	0.864516	0.861789	0.872692	0.811575	0.819402	0.798916	0.777268
1105.21	0.846367	0.852942	0.833709	0.830491	0.857698	0.865471	0.862521	0.874333	0.813473	0.821496	0.802074	0.779326
1107.14	0.845534	0.851882	0.833105	0.829599	0.85639	0.863933	0.861213	0.873354	0.812833	0.821199	0.802468	0.778782
1109.07	0.841666	0.84783	0.82925	0.825828	0.852428	0.85941	0.856998	0.868816	0.809209	0.817608	0.798963	0.775589
1111	0.829241	0.835165	0.816672	0.81311	0.840289	0.846712	0.844163	0.855585	0.797862	0.805509	0.786962	0.764306
1112.93	0.803986	0.809654	0.791734	0.787956	0.81546	0.821861	0.818884	0.829691	0.773574	0.781063	0.762722	0.740905
1114.86	0.773105	0.778449	0.761483	0.757457	0.784828	0.79084	0.787955	0.797923	0.743033	0.749886	0.732073	0.711093
1116.78	0.746746	0.75191	0.735246	0.731497	0.758536	0.764396	0.761344	0.770926	0.716818	0.722567	0.705107	0.684907
1118.71	0.728167	0.733154	0.716381	0.713248	0.739554	0.74532	0.742678	0.75182	0.697872	0.703207	0.685971	0.666609
1120.64	0.71426	0.718868	0.70252	0.699477	0.725432	0.730523	0.728476	0.737387	0.683759	0.689134	0.671969	0.653318
1122.57	0.702149	0.706547	0.690924	0.687587	0.713543	0.718182	0.716109	0.725313	0.672179	0.677434	0.660238	0.642111
1124.5	0.689563	0.693905	0.678668	0.675372	0.701246	0.705641	0.703671	0.712921	0.66049	0.665337	0.648431	0.630614
1126.43	0.675189	0.679488	0.664466	0.661386	0.687373	0.691653	0.689319	0.698853	0.647069	0.651744	0.634912	0.617381
1128.36	0.660515	0.664759	0.649923	0.647212	0.673136	0.677641	0.675303	0.684845	0.63285	0.637319	0.620968	0.604352
1130.29	0.648054	0.652234	0.637805	0.635548	0.661121	0.665742	0.663644	0.673217	0.620752	0.625111	0.60931	0.593438
1132.21	0.638994	0.643081	0.629084	0.626808	0.652056	0.656318	0.654658	0.664422	0.611496	0.615852	0.600478	0.584745
1134.14	0.632825	0.637093	0.623144	0.620836	0.645143	0.649331	0.648029	0.65788	0.604745	0.608767	0.594088	0.578595
1136.07	0.630283	0.634943	0.620764	0.618706	0.641185	0.6456	0.644256	0.654356	0.601388	0.605363	0.590539	0.575427
1138	0.633693	0.638098	0.624147	0.622212	0.641883	0.646593	0.645285	0.655607	0.602689	0.606909	0.591765	0.577046
1139.93	0.642558	0.646795	0.633146	0.630973	0.647524	0.652292	0.650905	0.661501	0.609433	0.613636	0.598635	0.5837
1141.86	0.654919	0.659375	0.645664	0.643232	0.656284	0.661138	0.659651	0.670466	0.620203	0.624126	0.608914	0.593932
1143.79	0.66889	0.673113	0.659333	0.656911	0.666225	0.671299	0.669762	0.680663	0.632658	0.636188	0.620776	0.605656
1145.72	0.682187	0.686086	0.672426	0.669847	0.675785	0.680912	0.679629	0.690384	0.644442	0.6479	0.632514	0.61674
1147.65	0.692725	0.696788	0.682954	0.680142	0.683425	0.6888	0.687385	0.698198	0.653871	0.657456	0.641525	0.625907
1149.57	0.699702	0.703958	0.689804	0.686927	0.688437	0.693943	0.692068	0.703147	0.660455	0.664018	0.647777	0.63228
1151.5	0.703434	0.707466	0.693537	0.690527	0.690914	0.696199	0.694508	0.705555	0.664165	0.667908	0.651586	0.63586
1153.43	0.703886	0.708121	0.694083	0.691018	0.691376	0.696225	0.694877	0.706031	0.665283	0.669032	0.652927	0.636966
1155.36	0.70147	0.70609	0.691816	0.688655	0.689728	0.69486	0.693228	0.7044	0.664249	0.667826	0.652329	0.63605
1157.29	0.69684	0.701805	0.687483	0.683603	0.686589	0.691982	0.690379	0.701362	0.661417	0.665089	0.650074	0.633493
1159.22	0.689412	0.694828	0.680492	0.675838	0.681908	0.686803	0.685747	0.696436	0.656431	0.660117	0.645574	0.629029
1161.15	0.676781	0.682144	0.667847	0.663283	0.672571	0.677352	0.676214	0.686947	0.647206	0.650991	0.636786	0.620195
1163.08	0.655437	0.660512	0.646646	0.641878	0.655124	0.660169	0.658506	0.66937	0.630052	0.633891	0.620215	0.603647
1165	0.624747	0.629664	0.616511	0.611398	0.628789	0.63338	0.631647	0.642331	0.603655	0.607268	0.594232	0.578237
1166.93	0.588049	0.593178	0.580762	0.575727	0.595847	0.599712	0.598109	0.609039	0.571092	0.574199	0.562	0.546836
1168.86	0.550934	0.555939	0.544331	0.539817	0.561059	0.564557	0.56311	0.574105	0.536589	0.539299	0.528085	0.514056
1170.79	0.516958	0.52177	0.510664	0.506564	0.528091	0.531348	0.530385	0.540963	0.503974	0.506257	0.496038	0.483139
1172.72	0.487127	0.492003	0.48143	0.477476	0.498748	0.50188	0.501098	0.511714	0.47532	0.476984	0.467684	0.455753
1174.65	0.461071	0.465837	0.456184	0.452321	0.473072	0.476113	0.4751	0.48597	0.450253	0.451457	0.443004	0.431996
1176.58	0.439298	0.444118	0.435161	0.431307	0.451113	0.454352	0.453164	0.464369	0.428944	0.430051	0.422315	0.412066
1178.51	0.421834	0.426627	0.418157	0.414324	0.433162	0.436418	0.435463	0.446763	0.41182	0.412797	0.405624	0.395977
1180.44	0.408091	0.412693	0.404771	0.400845	0.418812	0.421931	0.421354	0.432621	0.39811	0.399116	0.392466	0.383198
1182.36	0.397541	0.402172	0.394623	0.390727	0.407746	0.411075	0.410381	0.421948	0.387439	0.388591	0.382335	0.373196
1184.29	0.389754	0.394422	0.387193	0.38325	0.399698	0.402999	0.40209	0.413954	0.379707	0.38076	0.374695	0.365736
1186.22	0.384242	0.38893	0.381968	0.378003	0.394089	0.397398	0.396273	0.408416	0.374189	0.374987	0.36918	0.360503
1188.15	0.380633	0.38533	0.378551	0.374576	0.390396	0.393836	0.392743	0.404901	0.370146	0.371138	0.365474	0.356882
1190.08	0.378807	0.383621	0.37692	0.372802	0.388623	0.392056	0.391108	0.403312	0.367568	0.369061	0.363411	0.3547
1192.01	0.378517	0.383397	0.376754	0.372593	0.38857	0.392007	0.391054	0.403299	0.366783	0.368185	0.362739	0.354034
1193.94	0.379752	0.384538	0.377964	0.373772	0.389961	0.39343	0.392407	0.404551	0.367463	0.368694	0.363429	0.35471
1195.87	0.382176	0.386937	0.380368	0.376055	0.392741	0.396157	0.395092	0.407069	0.369362	0.370764	0.365286	0.356389
1197.79	0.385309	0.390079	0.383367	0.37901	0.396279	0.399764	0.398524	0.410319	0.372261	0.373766	0.36791	0.358763
1199.72	0.388719	0.393587	0.386692	0.382242	0.399984	0.403621	0.402117	0.413628	0.375364	0.376854	0.370836	0.361567
1201.65	0.392077	0.396914	0.389993	0.38532	0.403645	0.406991	0.405568	0.416662	0.378482	0.379838	0.373663	0.364211
1203.58	0.394847	0.399622	0.392548	0.387842	0.406592	0.409582	0.408188	0.419108	0.381208	0.382461	0.37595	0.366366
1205.51	0.396292	0.40116	0.39387	0.389246	0.408243	0.411123	0.409362	0.420187	0.382688	0.383857	0.377103	0.367556
1207.44	0.395658	0.400524	0.393229	0.388595	0.407674	0.410667	0.408431	0.419028	0.382136	0.38317	0.376291	0.366734
1209.37	0.393408	0.398107	0.390821	0.386326	0.405435	0.408267	0.405862	0.416158	0.379785	0.380848	0.373771	0.364328
1211.3	0.391216	0.395862	0.388515	0.384175	0.403591	0.406107	0.403648	0.413971	0.377609	0.378705	0.371626	0.362046
1213.23	0.390481	0.395294	0.387928	0.383593	0.403275	0.405775	0.403368	0.413622	0.376947	0.37806	0.371084	0.361365
1215.15	0.39186	0.396864	0.389367	0.385114	0.404962	0.407642	0.405045	0.41526	0.378255	0.379498	0.372216	0.36268
1217.08	0.39491	0.400065	0.392486	0.388153	0.408394	0.411153	0.4084	0.418703	0.381318	0.382672	0.37509	0.365578
1219.01	0.399309	0.404505	0.396961	0.392457	0.413045	0.415592	0.413155	0.423215	0.385552	0.386807	0.379192	0.369519
1220.94	0.404693	0.409919	0.402265	0.397827	0.418531	0.42104	0.41863	0.428474	0.390565	0.391797	0.384127	0.374213
1222.87	0.410775	0.415949	0.408162	0.403679	0.424475	0.427132	0.42435	0.434368	0.396244	0.397454	0.389455	0.379517
1224.8	0.417271	0.422257	0.414311	0.409792	0.43057	0.433276	0.430374	0.440445	0.402227	0.403349	0.394876	0.384982
1226.73	0.423644	0.428688	0.420401	0.415925	0.436738	0.439313	0.436456	0.446414	0.407866	0.409105	0.400582	0.390494
1228.66	0.430055	0.435232	0.426567	0.422001	0.442912	0.445416	0.442511	0.452464	0.413657	0.414954	0.406286	0.396036
1230.58	0.436359	0.441364	0.432694	0.427937	0.448912	0.451442	0.448682	0.45843	0.419645	0.420823	0.411807	0.401366
1232.51	0.442309	0.447051	0.438474	0.433609	0.454634	0.457073	0.454416	0.464033	0.425251	0.426393	0.417144	0.406374
1234.44	0.447081	0.451687	0.443147	0.438229	0.459163	0.461468	0.458699	0.468304	0.429588	0.430596	0.421287	0.410405
1236.37	0.449745	0.454349	0.445806	0.440814	0.461658	0.463905	0.461176	0.470615	0.432082	0.432789	0.423518	0.41272
1238.3	0.451034	0.455651	0.447053	0.441996	0.462801	0.465066	0.462544	0.471642	0.43349	0.433915	0.424641	0.41391
1240.23	0.452019	0.456314	0.447833	0.442784	0.463663	0.465775	0.463619	0.472257	0.434407	0.43472	0.425287	0.414574
1242.16	0.452447	0.456446	0.448121	0.443174	0.464134	0.466023	0.464	0.472587	0.434711	0.43495	0.425464	0.414664
1244.09	0.451739	0.455888	0.447554	0.442534	0.46366	0.465657	0.463203	0.472163	0.434173	0.434229	0.424872	0.414042
1246.02	0.450069	0.454465	0.446058	0.440915	0.462088	0.464252	0.461528	0.470941	0.432482	0.432537	0.423349	0.412588
1247.94	0.447601	0.452055	0.44371	0.43846	0.45969	0.461694	0.459171	0.468696	0.429833	0.429923	0.421019	0.410346
1249.87	0.444631	0.448982	0.440655	0.435365	0.456627	0.458584	0.456208	0.465793	0.426585	0.426754	0.417926	0.407487
1251.8	0.441486	0.445862	0.437597	0.432375	0.453441	0.455498	0.452867	0.462966	0.423244	0.423598	0.414701	0.404541
1253.73	0.438815	0.443337	0.435133	0.430009	0.450838	0.452866	0.450132	0.460385	0.420608	0.420823	0.412286	0.402259
1255.66	0.437212	0.441783	0.433579	0.428468	0.448851	0.450882	0.448602	0.45866	0.418703	0.41883	0.41076	0.400749
1257.59	0.436737	0.441332	0.433203	0.428032	0.447929	0.449942	0.44795	0.45797	0.417737	0.418027	0.410071	0.39996
1259.52	0.436387	0.440862	0.432811	0.427621	0.447569	0.449465	0.447323	0.457531	0.417456	0.41764	0.409633	0.399615
1261.45	0.435306	0.439717	0.431998	0.426712	0.446474	0.448465	0.446253	0.456778	0.416672	0.416767	0.408842	0.39896
1263.37	0.4342	0.438634	0.431049	0.425832	0.445389	0.447583	0.4452	0.456196	0.415729	0.41576	0.408175	0.398307
1265.3	0.432722	0.43722	0.429475	0.424203	0.444575	0.44675	0.44433	0.455622	0.41489	0.414907	0.407436	0.397633
1267.23	0.430936	0.435649	0.427891	0.422561	0.44379	0.445976	0.443576	0.455218	0.413943	0.414066	0.406836	0.396951
1269.16	0.430035	0.434937	0.42716	0.421805	0.44376	0.446107	0.443637	0.45545	0.413725	0.413792	0.406867	0.396944
1271.09	0.430077	0.434957	0.427306	0.421623	0.444433	0.446752	0.444701	0.45636	0.414108	0.414279	0.407237	0.39749
1273.02	0.431021	0.435864	0.428377	0.422569	0.445526	0.447937	0.446383	0.458075	0.41482	0.415332	0.40843	0.398588
1274.95	0.433059	0.437757	0.430413	0.424699	0.447287	0.449877	0.448526	0.460234	0.416394	0.417073	0.410497	0.400523
1276.88	0.435706	0.440398	0.432888	0.42725	0.449557	0.452304	0.450761	0.462825	0.418711	0.419415	0.412904	0.402821
1278.81	0.439024	0.444013	0.436236	0.430575	0.452736	0.455629	0.454016	0.466237	0.42192	0.422679	0.41612	0.405952
1280.73	0.442095	0.447114	0.439458	0.433816	0.455634	0.458471	0.45718	0.469133	0.424963	0.425741	0.419172	0.408936
1282.66	0.442885	0.447886	0.440237	0.43467	0.455781	0.458652	0.4574	0.469479	0.425581	0.426331	0.419716	0.409476
1284.59	0.441961	0.446926	0.439207	0.433727	0.45432	0.457153	0.455861	0.468094	0.42433	0.425112	0.418427	0.408297
1286.52	0.440452	0.445286	0.437625	0.432239	0.453028	0.455773	0.45426	0.46665	0.422892	0.42339	0.416696	0.406599
1288.45	0.437892	0.442544	0.435102	0.429643	0.451174	0.453862	0.452356	0.464663	0.420496	0.420832	0.414122	0.404198
1290.38	0.435767	0.440357	0.433152	0.427598	0.449466	0.452077	0.451169	0.463031	0.417571	0.418191	0.411837	0.401962
1292.31	0.434146	0.438859	0.431747	0.426159	0.448437	0.451104	0.450253	0.462144	0.41511	0.415881	0.410024	0.400182
1294.24	0.432912	0.43782	0.43059	0.425232	0.447883	0.450584	0.44944	0.46161	0.413475	0.4142	0.408596	0.39883
1296.16	0.432905	0.437756	0.430511	0.425153	0.448439	0.450987	0.449794	0.462082	0.413293	0.413924	0.408125	0.398464
1298.09	0.434555	0.439297	0.432105	0.426603	0.450261	0.452736	0.451605	0.464017	0.414415	0.415107	0.409284	0.399647
1300.02	0.437822	0.442748	0.435485	0.429957	0.45364	0.45615	0.455273	0.467418	0.417187	0.417926	0.412272	0.402475
1301.95	0.442291	0.44743	0.439831	0.434463	0.458224	0.46074	0.46009	0.472079	0.421373	0.422115	0.416332	0.406353
1303.88	0.447528	0.452741	0.44487	0.43948	0.463273	0.465894	0.465272	0.477455	0.426268	0.427012	0.421131	0.410978
1305.81	0.453614	0.458781	0.450837	0.445206	0.469335	0.472044	0.471282	0.48356	0.431835	0.432808	0.426827	0.416432
1307.74	0.459895	0.465006	0.456932	0.451161	0.475971	0.478643	0.477552	0.490051	0.438085	0.439091	0.432951	0.422097
1309.67	0.466342	0.471516	0.463367	0.45754	0.482511	0.485297	0.484309	0.496829	0.444364	0.44539	0.439159	0.428059
1311.59	0.472566	0.477799	0.469496	0.463683	0.489302	0.492019	0.491218	0.503585	0.450822	0.451689	0.445191	0.433926
1313.52	0.475859	0.481083	0.472659	0.466657	0.493326	0.495898	0.494902	0.507355	0.454754	0.455448	0.448667	0.437164
1315.45	0.476344	0.481542	0.473093	0.467135	0.493533	0.496375	0.495154	0.507754	0.454596	0.455676	0.448999	0.437613
1317.38	0.474096	0.479237	0.470856	0.464938	0.49171	0.49425	0.493145	0.505561	0.452415	0.453256	0.446623	0.435468
1319.31	0.468088	0.473195	0.465057	0.458897	0.486462	0.488474	0.487274	0.499711	0.447059	0.447551	0.441018	0.429933
1321.24	0.463442	0.468487	0.460509	0.454559	0.480984	0.483411	0.482132	0.494627	0.441113	0.442091	0.436115	0.425046
1323.17	0.461518	0.466617	0.458681	0.452997	0.47826	0.480911	0.480028	0.492167	0.437708	0.439125	0.433581	0.422542
1325.1	0.460901	0.466113	0.458179	0.452632	0.477177	0.479872	0.479125	0.4911	0.436277	0.437751	0.432283	0.421447
1327.03	0.4621	0.467177	0.459227	0.453818	0.477801	0.480513	0.479673	0.49177	0.436437	0.437987	0.432415	0.421855
1328.95	0.465043	0.470025	0.462071	0.456564	0.480518	0.4831	0.482322	0.494473	0.438483	0.44007	0.434505	0.423949
1330.88	0.469292	0.474453	0.466253	0.460765	0.484712	0.487264	0.486342	0.498633	0.442185	0.443576	0.438145	0.427518
1332.81	0.474446	0.479592	0.471269	0.465795	0.489574	0.492141	0.491037	0.503671	0.446516	0.447888	0.442495	0.431744
1334.74	0.478947	0.483912	0.475626	0.470094	0.494187	0.496595	0.495516	0.508201	0.450996	0.452009	0.44635	0.435542
1336.67	0.481855	0.486793	0.478272	0.473099	0.498175	0.500415	0.498973	0.511719	0.455331	0.455264	0.448966	0.438346
1338.6	0.481643	0.486065	0.477377	0.47229	0.500395	0.501786	0.500008	0.512642	0.458219	0.456605	0.449343	0.438698
1340.53	0.475269	0.479498	0.471356	0.465341	0.495326	0.495849	0.494228	0.506265	0.453039	0.451741	0.444445	0.433711
1342.46	0.472485	0.477315	0.46926	0.463507	0.489764	0.491438	0.490572	0.502549	0.446102	0.446592	0.440824	0.430278
1344.38	0.470066	0.474975	0.466866	0.461634	0.486304	0.488498	0.488116	0.500217	0.442	0.443068	0.437906	0.427697
1346.31	0.466251	0.471155	0.463205	0.458184	0.483043	0.485168	0.484439	0.49702	0.438076	0.43936	0.434197	0.424422
1348.24	0.464304	0.469328	0.461425	0.45672	0.481731	0.48385	0.482987	0.495815	0.435955	0.437334	0.432354	0.422739
1350.17	0.463434	0.468688	0.460888	0.45615	0.481689	0.483915	0.483054	0.495956	0.435295	0.436813	0.432051	0.422265
1352.1	0.465705	0.4713	0.463304	0.458595	0.484023	0.486676	0.485714	0.49897	0.437238	0.438933	0.43431	0.424572
1354.03	0.468595	0.474124	0.466125	0.461029	0.487553	0.49011	0.489119	0.502302	0.440636	0.442179	0.437314	0.427561
1355.96	0.469888	0.475192	0.467296	0.462076	0.489201	0.49151	0.490376	0.503625	0.442367	0.443876	0.438778	0.429008
1357.89	0.471331	0.476732	0.468725	0.463967	0.49056	0.492814	0.491824	0.505223	0.443752	0.445342	0.440245	0.43054
1359.82	0.474986	0.480386	0.47226	0.467908	0.494506	0.496832	0.496118	0.509329	0.447516	0.448846	0.443745	0.434081
1361.74	0.477658	0.482721	0.47443	0.469844	0.49888	0.50057	0.499208	0.51253	0.452528	0.452748	0.446864	0.437138
1363.67	0.475684	0.480802	0.472841	0.467411	0.497522	0.498813	0.496751	0.510144	0.452099	0.45239	0.446154	0.436089
1365.6	0.480182	0.485981	0.477685	0.472898	0.499007	0.501526	0.50001	0.513657	0.45319	0.454852	0.449677	0.439631
1367.53	0.486327	0.492184	0.483333	0.478965	0.5041	0.506914	0.505463	0.519403	0.45848	0.460036	0.454947	0.4451
1369.46	0.487591	0.493183	0.484648	0.479834	0.505717	0.508024	0.506708	0.520509	0.460705	0.462023	0.456441	0.446679
1371.39	0.490067	0.495801	0.487283	0.482908	0.506983	0.509825	0.508747	0.522669	0.462268	0.463708	0.458372	0.448866
1373.32	0.489658	0.4949	0.486131	0.481784	0.507285	0.509617	0.508029	0.522117	0.463573	0.463731	0.457932	0.448704
1375.25	0.482221	0.487201	0.479034	0.473911	0.500762	0.502031	0.500441	0.514238	0.458435	0.458051	0.452085	0.442669
1377.17	0.480961	0.486377	0.478094	0.473755	0.49737	0.499102	0.498071	0.512042	0.454939	0.455395	0.450022	0.440811
1379.1	0.477894	0.483271	0.475095	0.470911	0.493501	0.495336	0.494416	0.50847	0.4513	0.451937	0.446418	0.437607
1381.03	0.474405	0.479582	0.471565	0.467288	0.488951	0.491234	0.490327	0.504359	0.446848	0.447612	0.442426	0.433896
1382.96	0.47236	0.477687	0.469571	0.465683	0.486221	0.488901	0.487925	0.502008	0.44396	0.444797	0.439894	0.431662
1384.89	0.472886	0.478456	0.470152	0.467056	0.486895	0.489664	0.48864	0.503031	0.444578	0.444769	0.439872	0.432053
1386.82	0.46992	0.475153	0.466914	0.463464	0.486259	0.487963	0.48684	0.501302	0.44448	0.443004	0.437762	0.429993
1388.75	0.463464	0.468722	0.460955	0.456748	0.480722	0.481971	0.48106	0.495274	0.438739	0.437536	0.432528	0.424688
1390.68	0.464388	0.469982	0.46205	0.458434	0.479995	0.482199	0.481707	0.495971	0.437007	0.436849	0.432479	0.424909
1392.61	0.467882	0.473235	0.465058	0.462264	0.483288	0.485958	0.485344	0.499934	0.439815	0.439396	0.434973	0.427841
1394.53	0.466967	0.471487	0.463688	0.460282	0.485288	0.486997	0.485475	0.500335	0.441529	0.439884	0.434643	0.427793
1396.46	0.464076	0.469128	0.461444	0.457325	0.48448	0.48583	0.484285	0.498876	0.440806	0.438423	0.433298	0.42619
1398.39	0.464295	0.46944	0.461667	0.457703	0.484603	0.485913	0.484801	0.499806	0.440469	0.437935	0.433535	0.426365
1400.32	0.45943	0.464281	0.457294	0.452644	0.479949	0.481228	0.480644	0.495501	0.434915	0.433456	0.429402	0.422217
1402.25	0.461278	0.466745	0.459428	0.455831	0.480129	0.482547	0.482867	0.497927	0.433706	0.433465	0.430126	0.423163
1404.18	0.461093	0.466176	0.458814	0.455355	0.4813	0.483389	0.483396	0.498856	0.434066	0.433604	0.42997	0.422902
1406.11	0.456118	0.460957	0.454214	0.449862	0.477847	0.479596	0.479421	0.49444	0.430469	0.430001	0.426369	0.418746
1408.04	0.456779	0.461985	0.455043	0.451162	0.477529	0.479812	0.480349	0.49521	0.429863	0.429588	0.42661	0.418938
1409.96	0.457557	0.462598	0.45554	0.45178	0.478748	0.480905	0.481293	0.496218	0.431067	0.430532	0.42725	0.419486
1411.89	0.45651	0.461389	0.454551	0.450227	0.478628	0.480343	0.480568	0.495245	0.431198	0.430477	0.426714	0.418828
1413.82	0.457776	0.462883	0.455726	0.451605	0.479285	0.481263	0.481562	0.496017	0.432187	0.431492	0.427925	0.420038
1415.75	0.461487	0.46677	0.458875	0.455503	0.48342	0.485618	0.485414	0.499757	0.437034	0.435564	0.431574	0.423693
1417.68	0.463995	0.468838	0.460389	0.457096	0.488133	0.48952	0.488412	0.50279	0.442323	0.439608	0.434548	0.426678
1419.61	0.456049	0.460338	0.452934	0.447218	0.482342	0.482113	0.480802	0.494547	0.437016	0.434764	0.428999	0.420411
1421.54	0.457838	0.462775	0.455311	0.44995	0.481267	0.482211	0.481795	0.495497	0.43593	0.434831	0.430062	0.421264
1423.47	0.459511	0.46446	0.456692	0.451249	0.482692	0.483648	0.483026	0.497096	0.438186	0.436837	0.432022	0.422893
1425.4	0.454785	0.459933	0.452458	0.44631	0.47784	0.478782	0.47783	0.491615	0.434301	0.433745	0.428678	0.418939
1427.32	0.456975	0.462375	0.454516	0.449193	0.477904	0.479732	0.479004	0.49274	0.434485	0.43464	0.430071	0.420278
1429.25	0.455756	0.46105	0.45289	0.447296	0.477168	0.478278	0.477179	0.490624	0.434853	0.434642	0.42935	0.419617
1431.18	0.451361	0.45648	0.448706	0.442318	0.472793	0.473354	0.471955	0.484981	0.432215	0.431835	0.426163	0.416247
1433.11	0.451131	0.456307	0.448423	0.442684	0.470651	0.471827	0.470379	0.48311	0.431913	0.431368	0.425747	0.41599
1435.04	0.45295	0.45822	0.449604	0.444796	0.471391	0.472729	0.471033	0.483813	0.434604	0.432739	0.426916	0.417812
1436.97	0.443741	0.448408	0.440697	0.43415	0.463606	0.463104	0.460669	0.473329	0.428819	0.425968	0.419495	0.410208
1438.9	0.440169	0.445022	0.43772	0.43107	0.457035	0.45726	0.455079	0.467667	0.422718	0.421788	0.415569	0.405927
1440.83	0.4426	0.447682	0.439938	0.434223	0.456444	0.457641	0.455715	0.468449	0.422814	0.422389	0.416735	0.407117
1442.75	0.441817	0.44712	0.439218	0.433526	0.454891	0.456063	0.453933	0.466718	0.422217	0.421589	0.415729	0.406284
1444.68	0.443005	0.448579	0.440417	0.434989	0.455315	0.456427	0.454202	0.467105	0.423413	0.422629	0.416494	0.407414
1446.61	0.444452	0.449631	0.441322	0.435817	0.457099	0.457493	0.455025	0.467816	0.425941	0.424098	0.417666	0.408852
1448.54	0.44133	0.446205	0.438255	0.43185	0.454425	0.454293	0.45126	0.464004	0.424604	0.42218	0.415538	0.406392
1450.47	0.442458	0.447738	0.439611	0.433711	0.45357	0.454277	0.451193	0.464134	0.424782	0.422755	0.416504	0.407144
1452.4	0.445214	0.450466	0.442074	0.436661	0.455411	0.456178	0.453369	0.465889	0.42741	0.425405	0.418785	0.40984
1454.33	0.449582	0.454799	0.445737	0.441402	0.45939	0.459968	0.457516	0.469636	0.43297	0.429579	0.422596	0.414257
1456.26	0.447652	0.452149	0.442485	0.438382	0.46059	0.459493	0.455703	0.468444	0.434421	0.428532	0.4212	0.413159
1458.18	0.423805	0.42739	0.419943	0.412073	0.442957	0.438992	0.433191	0.445985	0.416766	0.411631	0.403045	0.394354
1460.11	0.41803	0.422875	0.415897	0.408761	0.431339	0.430003	0.425994	0.438533	0.405695	0.403009	0.396143	0.387461
1462.04	0.418115	0.423492	0.416165	0.410683	0.427198	0.427786	0.424837	0.437599	0.401286	0.399517	0.394191	0.38609
1463.97	0.412677	0.41773	0.410347	0.404907	0.422821	0.422826	0.419761	0.432699	0.396711	0.393949	0.388941	0.381292
1465.9	0.397669	0.402444	0.395939	0.389206	0.410804	0.410014	0.406648	0.419115	0.384769	0.381913	0.376803	0.368953
1467.83	0.388112	0.393084	0.386874	0.380774	0.400188	0.400364	0.397504	0.409645	0.372919	0.371028	0.366953	0.359181
1469.76	0.379081	0.38438	0.377987	0.372939	0.391493	0.391988	0.389508	0.401655	0.362388	0.36008	0.357081	0.350099
1471.69	0.36606	0.371108	0.364702	0.359481	0.383013	0.381955	0.378597	0.391255	0.351598	0.346916	0.343868	0.338119
1473.62	0.338719	0.343403	0.338152	0.331505	0.362749	0.360249	0.355857	0.368495	0.330258	0.324897	0.321735	0.315671
1475.54	0.329564	0.334418	0.329491	0.322844	0.352137	0.351018	0.34711	0.360424	0.318212	0.314863	0.312925	0.306547
1477.47	0.321496	0.326716	0.32236	0.315424	0.3433	0.343156	0.339609	0.353379	0.308086	0.306514	0.305422	0.298962
1479.4	0.321073	0.326669	0.322231	0.315818	0.341854	0.342595	0.33996	0.353645	0.305417	0.305024	0.304709	0.298317
1481.33	0.32025	0.325821	0.321266	0.314758	0.342009	0.342572	0.340021	0.353918	0.305174	0.304787	0.304511	0.298019
1483.26	0.31973	0.325471	0.32106	0.314836	0.341162	0.342272	0.339708	0.35388	0.304507	0.304405	0.304366	0.297877
1485.19	0.323723	0.329565	0.324747	0.319308	0.345146	0.346467	0.344089	0.358481	0.308656	0.308166	0.307914	0.301831
1487.12	0.328948	0.33514	0.32959	0.32436	0.352818	0.35289	0.349835	0.364605	0.31656	0.314805	0.313209	0.307689
1489.05	0.334168	0.339935	0.333976	0.328311	0.360109	0.359086	0.355062	0.370159	0.32487	0.321306	0.318724	0.313271
1490.97	0.335386	0.340586	0.335598	0.328717	0.359913	0.359175	0.35494	0.369991	0.325543	0.322865	0.32062	0.314389
1492.9	0.342559	0.348857	0.343619	0.337949	0.362842	0.363982	0.360823	0.376134	0.328078	0.327685	0.326418	0.320262
1494.83	0.35372	0.360312	0.354378	0.349606	0.37302	0.374636	0.37163	0.387544	0.33876	0.337788	0.336533	0.330819
1496.76	0.36146	0.36743	0.361523	0.355797	0.382572	0.382894	0.378953	0.395325	0.349272	0.34673	0.344387	0.338949
1498.69	0.367361	0.373259	0.367475	0.361423	0.387982	0.387956	0.384511	0.400501	0.355092	0.353133	0.349937	0.344334
1500.62	0.375996	0.382044	0.376163	0.370154	0.394659	0.395279	0.392598	0.408249	0.362265	0.360902	0.357529	0.351545
1502.55	0.387575	0.393998	0.387738	0.382487	0.404359	0.405716	0.403504	0.419085	0.372543	0.371485	0.368024	0.361991
1504.48	0.403251	0.409965	0.402352	0.399201	0.419115	0.420955	0.418186	0.434385	0.388413	0.385986	0.382375	0.376879
1506.41	0.418654	0.42408	0.414548	0.411436	0.44052	0.439377	0.431444	0.449772	0.412065	0.404145	0.39726	0.392144
1508.33	0.423561	0.428593	0.420451	0.412908	0.449157	0.445578	0.436835	0.454087	0.422182	0.41434	0.404386	0.397599
1510.26	0.439014	0.444907	0.436404	0.430341	0.457002	0.45602	0.45006	0.466895	0.430671	0.425217	0.416707	0.409711
1512.19	0.454173	0.460345	0.451735	0.446138	0.466962	0.467168	0.462566	0.479218	0.441415	0.437687	0.42925	0.42215
1514.12	0.471526	0.478055	0.468502	0.464383	0.480937	0.482052	0.478335	0.494653	0.456779	0.452876	0.444104	0.437285
1516.05	0.483542	0.489166	0.478961	0.474764	0.494556	0.494271	0.489715	0.505899	0.47213	0.465671	0.455416	0.449059
1517.98	0.487889	0.493259	0.48402	0.478226	0.499762	0.498464	0.494184	0.509041	0.478245	0.471768	0.460404	0.454128
1519.91	0.501593	0.507085	0.496118	0.492833	0.509952	0.510172	0.505759	0.521327	0.488998	0.481212	0.470799	0.465112
1521.84	0.502063	0.506608	0.495748	0.490396	0.515485	0.5131	0.505394	0.522201	0.495241	0.484426	0.473056	0.467272
1523.76	0.508501	0.513368	0.503685	0.497838	0.518661	0.517471	0.51164	0.527154	0.499385	0.490493	0.478351	0.472353
1525.69	0.520934	0.525654	0.515324	0.509743	0.528368	0.528263	0.522436	0.538001	0.509647	0.501087	0.48848	0.482453
1527.62	0.525962	0.530643	0.520555	0.513587	0.533155	0.5325	0.526472	0.541754	0.515396	0.507199	0.494003	0.487347
1529.55	0.537456	0.542489	0.532167	0.526116	0.540404	0.54079	0.536107	0.550654	0.523698	0.516398	0.503424	0.49657
1531.48	0.553609	0.558983	0.546987	0.543149	0.553526	0.554768	0.550196	0.564756	0.538221	0.529796	0.51664	0.51022
1533.41	0.557398	0.561574	0.549667	0.543966	0.560977	0.560032	0.553646	0.568722	0.547484	0.536352	0.522305	0.515726
1535.34	0.563079	0.567078	0.555757	0.549532	0.56585	0.564823	0.558908	0.572398	0.553002	0.543149	0.52818	0.521199
1537.27	0.580931	0.58533	0.572313	0.569582	0.578467	0.57904	0.573195	0.587092	0.566566	0.556352	0.541532	0.535513
1539.2	0.583628	0.587315	0.573064	0.571192	0.585374	0.583774	0.571437	0.589635	0.572881	0.558013	0.543638	0.538781
1541.12	0.560126	0.56298	0.55116	0.544482	0.572898	0.568093	0.553679	0.57018	0.56094	0.545535	0.52884	0.523225
1543.05	0.565744	0.568847	0.55685	0.550158	0.573152	0.569156	0.557738	0.573869	0.562646	0.547818	0.531077	0.52513
1544.98	0.556172	0.558864	0.548123	0.53913	0.563033	0.558251	0.548994	0.56306	0.553819	0.539959	0.522912	0.515934
1546.91	0.556962	0.560307	0.549791	0.543088	0.556175	0.554309	0.548007	0.560771	0.545833	0.534237	0.519642	0.512888
1548.84	0.55689	0.560359	0.549253	0.544053	0.553412	0.552815	0.546142	0.560049	0.54208	0.530208	0.516972	0.510635
1550.77	0.536152	0.53939	0.529734	0.522977	0.537013	0.535617	0.528116	0.54192	0.524481	0.512287	0.498599	0.492301
1552.7	0.53021	0.533623	0.524115	0.518764	0.52934	0.529167	0.522653	0.536621	0.51336	0.502039	0.490216	0.484791
1554.63	0.513665	0.516682	0.507417	0.502012	0.51738	0.515914	0.509312	0.523643	0.496855	0.484854	0.474247	0.469616
1556.55	0.505354	0.508924	0.499434	0.495859	0.511475	0.509942	0.504281	0.518306	0.487885	0.475556	0.466067	0.462298
1558.48	0.495631	0.498066	0.4881	0.484551	0.505595	0.502658	0.493749	0.51143	0.475628	0.462405	0.453996	0.451632
1560.41	0.446743	0.44923	0.443524	0.434241	0.466212	0.46129	0.453489	0.469209	0.434372	0.423471	0.415304	0.410523
1562.34	0.451958	0.456129	0.449532	0.443721	0.465514	0.464133	0.4596	0.474881	0.430374	0.422231	0.416866	0.412251
1564.27	0.448925	0.453284	0.446544	0.441565	0.46323	0.46223	0.45832	0.473876	0.424684	0.417495	0.413159	0.408868
1566.2	0.442184	0.446821	0.440439	0.435658	0.45844	0.457728	0.454273	0.469606	0.417417	0.410577	0.407151	0.402869
1568.13	0.444049	0.448891	0.441983	0.438423	0.460679	0.460603	0.45669	0.473051	0.41709	0.409832	0.407198	0.40362
1570.06	0.432087	0.436127	0.431004	0.424775	0.454152	0.452275	0.447302	0.463747	0.408061	0.400913	0.397835	0.39447
1571.99	0.428676	0.433171	0.428325	0.422815	0.450354	0.449511	0.445774	0.46152	0.402087	0.396675	0.394618	0.390726
1573.91	0.43582	0.440833	0.434824	0.431803	0.456938	0.457299	0.453926	0.470367	0.405993	0.400634	0.399684	0.396296
1575.84	0.432859	0.437326	0.431458	0.427081	0.45879	0.457046	0.452953	0.469777	0.405145	0.398717	0.397584	0.394662
1577.77	0.423866	0.428187	0.423542	0.417356	0.452866	0.450016	0.446642	0.462172	0.398169	0.392653	0.3911	0.387378
1579.7	0.427818	0.432888	0.427937	0.423022	0.454705	0.453811	0.451219	0.466707	0.3986	0.394386	0.393644	0.389871
1581.63	0.431312	0.436422	0.431367	0.426842	0.458437	0.458029	0.455512	0.471365	0.400473	0.396777	0.39638	0.392643
1583.56	0.433364	0.438447	0.43341	0.428866	0.461918	0.461142	0.458892	0.474761	0.40225	0.398935	0.398458	0.394771
1585.49	0.436464	0.441677	0.43654	0.432193	0.466137	0.465285	0.463466	0.479086	0.404964	0.401936	0.401467	0.397808
1587.42	0.440137	0.445421	0.440055	0.435834	0.470953	0.470256	0.468045	0.484098	0.408548	0.405521	0.404779	0.401253
1589.34	0.444652	0.449864	0.444353	0.439912	0.476791	0.476098	0.47326	0.489686	0.413186	0.410077	0.409035	0.405403
1591.27	0.448939	0.454199	0.448562	0.444184	0.482391	0.481484	0.478644	0.49469	0.417837	0.414616	0.413491	0.409471
1593.2	0.454737	0.460208	0.454066	0.450118	0.489053	0.488124	0.485157	0.501265	0.423698	0.420163	0.419053	0.414888
1595.13	0.459437	0.464736	0.458635	0.454184	0.494813	0.493556	0.490415	0.506438	0.429051	0.42529	0.42359	0.419454
1597.06	0.464569	0.469941	0.463734	0.458979	0.499891	0.498683	0.495613	0.511378	0.43388	0.430557	0.428201	0.424091
1598.99	0.471357	0.476863	0.470263	0.465903	0.506053	0.505164	0.501946	0.517863	0.439926	0.436562	0.434031	0.429866
1600.92	0.479135	0.484476	0.477649	0.473258	0.513682	0.512759	0.50902	0.525161	0.44798	0.443809	0.440853	0.436823
1602.85	0.485528	0.490748	0.483801	0.478774	0.520053	0.518745	0.51448	0.530765	0.455419	0.450822	0.447142	0.442856
1604.77	0.493684	0.498947	0.491873	0.486898	0.526826	0.52546	0.521356	0.537467	0.463278	0.45861	0.454372	0.449836
1606.7	0.503291	0.508365	0.501128	0.496234	0.534786	0.533482	0.529118	0.545286	0.472502	0.467035	0.462381	0.457878
1608.63	0.511855	0.516601	0.509309	0.504067	0.541966	0.540247	0.535594	0.551618	0.481763	0.475482	0.469884	0.465185
1610.56	0.520188	0.524698	0.517446	0.512029	0.547698	0.546062	0.541667	0.557429	0.489673	0.483443	0.476831	0.471896
1612.49	0.532783	0.537235	0.52952	0.52476	0.556792	0.555667	0.5512	0.566893	0.500293	0.494122	0.486782	0.481768
1614.42	0.548922	0.553643	0.544456	0.541491	0.569861	0.569194	0.564586	0.580231	0.514771	0.507812	0.499641	0.495137
1616.35	0.559759	0.563939	0.554322	0.549961	0.580103	0.578189	0.571044	0.5878	0.527721	0.518977	0.509008	0.505045
1618.28	0.566303	0.570127	0.561978	0.555084	0.584515	0.58155	0.573904	0.59007	0.535738	0.527316	0.515702	0.510927
1620.21	0.588408	0.592722	0.583352	0.578856	0.600049	0.598719	0.592171	0.608337	0.553323	0.545057	0.533242	0.528197
1622.13	0.607194	0.611056	0.600239	0.596802	0.616097	0.614548	0.606237	0.623923	0.571656	0.56217	0.549188	0.544357
1624.06	0.616532	0.620367	0.609854	0.603893	0.62522	0.622218	0.612921	0.629516	0.584743	0.574895	0.559969	0.554402
1625.99	0.633729	0.638222	0.626728	0.621677	0.637426	0.635946	0.627688	0.643294	0.599945	0.590446	0.574985	0.568684
1627.92	0.645964	0.650487	0.638443	0.63271	0.648798	0.647118	0.639008	0.653919	0.614326	0.60435	0.587724	0.580757
1629.85	0.654462	0.658608	0.646722	0.64011	0.656774	0.654577	0.646635	0.659785	0.624929	0.615047	0.596845	0.589453
1631.78	0.670975	0.674842	0.661664	0.656635	0.670369	0.669029	0.660506	0.67323	0.640468	0.630081	0.610829	0.603612
1633.71	0.687723	0.691161	0.676424	0.673153	0.684837	0.684655	0.672926	0.687973	0.657385	0.645622	0.625416	0.618641
1635.64	0.68454	0.686269	0.672257	0.6659	0.686994	0.68461	0.666753	0.685138	0.662672	0.648422	0.626601	0.620035
1637.56	0.680003	0.682007	0.66895	0.659544	0.684891	0.680548	0.66478	0.680067	0.665262	0.650469	0.628241	0.620097
1639.49	0.695718	0.698448	0.684145	0.676445	0.693761	0.69139	0.678287	0.691625	0.676393	0.663834	0.641285	0.632437
1641.42	0.705293	0.708115	0.693236	0.686337	0.699949	0.698092	0.685578	0.698063	0.685159	0.673215	0.65047	0.641087
1643.35	0.717198	0.720304	0.704315	0.699533	0.708561	0.707658	0.694299	0.707007	0.696587	0.684102	0.661497	0.652101
1645.28	0.730214	0.732978	0.715065	0.712294	0.718506	0.718442	0.701097	0.717053	0.709066	0.694718	0.671917	0.663939
1647.21	0.710257	0.712027	0.696569	0.688218	0.708902	0.703839	0.682869	0.700768	0.703526	0.68771	0.663091	0.655474
1649.14	0.715541	0.718455	0.703714	0.696986	0.708513	0.704386	0.688567	0.702134	0.707439	0.693812	0.669074	0.66086
1651.07	0.741954	0.745332	0.727274	0.727026	0.723311	0.722744	0.707557	0.722108	0.72558	0.71186	0.688415	0.681472
1653	0.711676	0.71448	0.696551	0.69292	0.701423	0.695779	0.67562	0.695917	0.705628	0.689403	0.667172	0.660681
1654.92	0.684769	0.688427	0.673673	0.665017	0.676956	0.670387	0.654507	0.669986	0.685239	0.671782	0.648034	0.640272
1656.85	0.695574	0.699456	0.683724	0.677951	0.676836	0.674133	0.661239	0.675267	0.687091	0.676561	0.653976	0.646566
1658.78	0.689623	0.693537	0.677599	0.673464	0.665414	0.664314	0.652681	0.666798	0.676165	0.666983	0.646235	0.638908
1660.71	0.67845	0.682447	0.665994	0.663759	0.652348	0.651565	0.640144	0.655276	0.662431	0.653309	0.633778	0.627192
1662.64	0.645788	0.649432	0.634232	0.629953	0.624869	0.622356	0.610808	0.626682	0.634003	0.624945	0.60586	0.599595
1664.57	0.617004	0.621663	0.607608	0.602796	0.597392	0.595207	0.585386	0.600475	0.605464	0.597989	0.580123	0.573702
1666.5	0.612345	0.617692	0.602667	0.600685	0.58877	0.588467	0.579077	0.594995	0.59505	0.588422	0.572031	0.566545
1668.43	0.593811	0.59855	0.583305	0.581821	0.572869	0.571868	0.560684	0.578506	0.576506	0.569242	0.553374	0.548992
1670.35	0.554801	0.558712	0.545444	0.540713	0.542648	0.538607	0.527214	0.54489	0.545105	0.537185	0.521834	0.516593
1672.28	0.539391	0.544443	0.531437	0.527923	0.525173	0.522454	0.513461	0.53032	0.527327	0.520384	0.507115	0.501484
1674.21	0.530944	0.536069	0.522669	0.51985	0.514864	0.512787	0.50443	0.522032	0.515692	0.508755	0.497152	0.492014
1676.14	0.498445	0.503389	0.491509	0.486623	0.487267	0.483892	0.475784	0.492993	0.487118	0.480507	0.469609	0.464
1678.07	0.492057	0.497553	0.48525	0.482056	0.478308	0.476247	0.469062	0.486152	0.477025	0.471529	0.461413	0.456138
1680	0.478725	0.484198	0.471662	0.469097	0.467199	0.464634	0.45699	0.474439	0.464702	0.458457	0.448724	0.443999
1681.93	0.468297	0.473688	0.460518	0.459748	0.458585	0.45613	0.447358	0.465588	0.45539	0.44793	0.439181	0.434921
1683.86	0.444576	0.44878	0.436639	0.434242	0.440167	0.435938	0.424236	0.444626	0.434842	0.426328	0.418189	0.414253
1685.79	0.407978	0.412908	0.403378	0.397448	0.408219	0.40297	0.393279	0.411486	0.402167	0.395638	0.388144	0.382927
1687.71	0.405588	0.411093	0.400625	0.396788	0.40154	0.398356	0.39071	0.408602	0.394203	0.389011	0.383233	0.378207
1689.64	0.387657	0.393099	0.383141	0.378896	0.385074	0.381642	0.374437	0.391956	0.376652	0.372214	0.367108	0.361823
1691.57	0.37249	0.378705	0.369323	0.365451	0.369458	0.366826	0.360729	0.377755	0.359095	0.356409	0.352791	0.347455
1693.5	0.367884	0.374644	0.364277	0.362579	0.363718	0.362242	0.356553	0.374114	0.351656	0.349156	0.346849	0.34267
1695.43	0.353749	0.359494	0.34907	0.3473	0.354255	0.351341	0.343327	0.362898	0.339325	0.335109	0.333272	0.330177
1697.36	0.328631	0.334205	0.325348	0.322253	0.336846	0.332469	0.32339	0.342714	0.320654	0.315803	0.313706	0.310577
1699.29	0.322449	0.328222	0.318793	0.316347	0.330664	0.327093	0.318319	0.338621	0.313337	0.308369	0.307614	0.304772
1701.22	0.291682	0.297081	0.290009	0.284748	0.305357	0.300531	0.292834	0.312409	0.286285	0.281399	0.281766	0.277904
1703.14	0.287775	0.293812	0.286701	0.282819	0.30058	0.2972	0.291369	0.310487	0.279692	0.275712	0.27739	0.274077
1705.07	0.280151	0.286006	0.278913	0.274909	0.29479	0.291599	0.285746	0.306136	0.272622	0.267875	0.270649	0.267877
1707	0.267334	0.273299	0.267398	0.262506	0.283818	0.2809	0.276399	0.296577	0.260384	0.256608	0.260292	0.25734
1708.93	0.263887	0.270037	0.264168	0.260017	0.279599	0.277918	0.274598	0.295283	0.254221	0.252035	0.256782	0.254046
1710.86	0.260791	0.266943	0.261284	0.25754	0.277265	0.276325	0.27342	0.295384	0.250812	0.248935	0.25456	0.252332
1712.79	0.260835	0.26711	0.261423	0.258245	0.2787	0.277866	0.275401	0.298841	0.251516	0.249064	0.255118	0.253756
1714.72	0.260961	0.267359	0.2617	0.258538	0.282761	0.281317	0.278245	0.303783	0.254592	0.250771	0.256737	0.256536
1716.65	0.258489	0.264868	0.259301	0.255542	0.283404	0.281903	0.277847	0.305326	0.255316	0.250258	0.2565	0.25687
1718.58	0.251009	0.257168	0.253403	0.247974	0.274927	0.274	0.271864	0.299675	0.247808	0.243835	0.251237	0.251016
1720.5	0.251821	0.25889	0.255522	0.2507	0.272197	0.273589	0.274059	0.30242	0.244222	0.24272	0.25192	0.251833
1722.43	0.254787	0.262518	0.258883	0.254662	0.274079	0.276718	0.278099	0.307821	0.245839	0.245067	0.255192	0.255707
1724.36	0.254431	0.26237	0.259064	0.254599	0.273567	0.276647	0.278574	0.308695	0.245863	0.245289	0.255907	0.256777
1726.29	0.25639	0.264722	0.261237	0.257337	0.273969	0.278038	0.28092	0.311197	0.247044	0.247044	0.25833	0.259561
1728.22	0.259696	0.268243	0.26442	0.26101	0.277073	0.281417	0.284148	0.314994	0.251626	0.251275	0.262119	0.263905
1730.15	0.260984	0.269399	0.265759	0.261769	0.279803	0.283284	0.284559	0.315245	0.256679	0.255206	0.264654	0.266643
1732.08	0.264319	0.27286	0.268643	0.265193	0.2831	0.286293	0.286546	0.317671	0.262256	0.259353	0.26861	0.270871
1734.01	0.260549	0.267965	0.26416	0.258629	0.280666	0.281508	0.278712	0.309492	0.262688	0.258211	0.265849	0.267401
1735.93	0.256928	0.265268	0.262331	0.256063	0.273529	0.274311	0.272	0.299862	0.257382	0.255451	0.262493	0.262984
1737.86	0.260792	0.26976	0.265773	0.260923	0.273973	0.275858	0.274097	0.301414	0.259093	0.257507	0.264946	0.265504
1739.79	0.253791	0.262671	0.25872	0.25289	0.267314	0.267897	0.264285	0.29002	0.253859	0.251426	0.258059	0.257861
1741.72	0.247502	0.256509	0.25269	0.24683	0.260436	0.260696	0.256537	0.280781	0.247085	0.245284	0.251205	0.250474
1743.65	0.238221	0.247046	0.243165	0.23715	0.252642	0.252143	0.24692	0.269857	0.238714	0.237003	0.241692	0.2405
1745.58	0.226525	0.235401	0.231599	0.225421	0.242367	0.241374	0.235384	0.257054	0.227028	0.225176	0.229836	0.228306
1747.51	0.213984	0.222528	0.218754	0.212408	0.23207	0.230271	0.223249	0.244798	0.214773	0.212137	0.216965	0.215607
1749.44	0.194612	0.202941	0.199802	0.192538	0.217149	0.214215	0.206346	0.227385	0.197942	0.194923	0.199354	0.19758
1751.36	0.175153	0.183323	0.181183	0.172973	0.199165	0.19655	0.188862	0.209082	0.177657	0.175419	0.180574	0.178006
1753.29	0.158741	0.167518	0.165896	0.157648	0.182791	0.181403	0.174296	0.193845	0.158225	0.157794	0.164542	0.161747
1755.22	0.149924	0.158857	0.156997	0.149176	0.174559	0.17381	0.16678	0.186629	0.147769	0.147622	0.155277	0.152757
1757.15	0.136468	0.144787	0.143527	0.135021	0.164961	0.163601	0.155906	0.175918	0.13628	0.135424	0.143068	0.140512
1759.08	0.127604	0.136088	0.135129	0.12656	0.157505	0.156385	0.149358	0.168927	0.127338	0.126649	0.135005	0.132505
1761.01	0.122092	0.130458	0.129293	0.120753	0.153618	0.152293	0.145443	0.165389	0.122473	0.120992	0.129795	0.127557
1762.94	0.114636	0.122709	0.122232	0.113238	0.14758	0.146093	0.139088	0.159156	0.114967	0.114044	0.122998	0.120575
1764.87	0.111298	0.119752	0.119315	0.110585	0.144001	0.143353	0.137156	0.157024	0.11008	0.110389	0.119869	0.117506
1766.8	0.109926	0.118397	0.117571	0.10888	0.14398	0.143319	0.13706	0.157315	0.110037	0.109365	0.118851	0.116684
1768.72	0.107543	0.115974	0.11524	0.106438	0.143651	0.142522	0.135716	0.156334	0.109354	0.107762	0.117156	0.115152
1770.65	0.107015	0.115145	0.114273	0.105613	0.14476	0.143114	0.135867	0.1572	0.109468	0.107197	0.116817	0.115406
1772.58	0.104518	0.112239	0.111897	0.102581	0.143817	0.141148	0.132919	0.155194	0.107593	0.105125	0.114651	0.11334
1774.51	0.102144	0.110312	0.110216	0.100735	0.140183	0.138231	0.13084	0.152438	0.104076	0.102775	0.112481	0.110604
1776.44	0.101261	0.109764	0.109561	0.100052	0.138336	0.137159	0.13063	0.151433	0.102161	0.101678	0.111542	0.1094
1778.37	0.100957	0.109442	0.10918	0.099684	0.138186	0.137213	0.13085	0.151276	0.101855	0.101421	0.11117	0.108951
1780.3	0.100446	0.108662	0.108333	0.098739	0.138298	0.136903	0.130053	0.150594	0.102263	0.100977	0.110635	0.108298
1782.23	0.099216	0.107736	0.107444	0.097647	0.136863	0.135499	0.128619	0.148845	0.100408	0.099656	0.109564	0.106916
1784.15	0.098983	0.107511	0.107059	0.09722	0.136666	0.135316	0.128201	0.148461	0.10007	0.099385	0.109199	0.106384
1786.08	0.098029	0.106417	0.106131	0.096209	0.135594	0.134072	0.126683	0.14664	0.09873	0.09828	0.107962	0.105045
1788.01	0.09764	0.10615	0.105835	0.096092	0.135186	0.133898	0.126828	0.145991	0.097871	0.097839	0.107524	0.104737
1789.94	0.098331	0.106594	0.105892	0.096212	0.137736	0.135883	0.128175	0.147416	0.100799	0.099226	0.108479	0.106039
1791.87	0.098	0.105743	0.105043	0.095025	0.139202	0.136233	0.127063	0.14691	0.102017	0.099434	0.10811	0.105765
1793.8	0.096462	0.104265	0.103993	0.093722	0.137017	0.13416	0.12535	0.144365	0.099443	0.097838	0.106459	0.103659
1795.73	0.096226	0.104145	0.103815	0.093468	0.136353	0.133831	0.125598	0.143903	0.098953	0.097492	0.106229	0.103072
1797.66	0.095664	0.103875	0.103529	0.093075	0.135442	0.133174	0.125013	0.143196	0.097873	0.096686	0.10567	0.10255
1799.59	0.095385	0.103722	0.103194	0.092771	0.135602	0.133266	0.124911	0.143236	0.097881	0.096652	0.105466	0.102486
1801.51	0.09483	0.102866	0.102505	0.091931	0.135427	0.132849	0.124221	0.142558	0.098084	0.09638	0.104965	0.101629
1803.44	0.093723	0.102009	0.101947	0.091325	0.133192	0.131078	0.122682	0.14094	0.095379	0.094661	0.103688	0.10024
1805.37	0.093129	0.101669	0.10153	0.091035	0.132237	0.130413	0.122163	0.140336	0.093723	0.093837	0.103105	0.099676
1807.3	0.092925	0.101469	0.101282	0.090744	0.132466	0.130585	0.122389	0.140428	0.094032	0.093938	0.103116	0.099698
1809.23	0.092569	0.101139	0.100903	0.090353	0.132749	0.130764	0.122398	0.14053	0.09437	0.093904	0.103005	0.099776
1811.16	0.091984	0.100434	0.100326	0.089684	0.132757	0.130416	0.121781	0.140136	0.094293	0.093566	0.102562	0.099304
1813.09	0.091104	0.09968	0.099971	0.089108	0.131139	0.129006	0.120591	0.138983	0.09231	0.092435	0.101689	0.098268
1815.02	0.090835	0.099654	0.099776	0.089071	0.130234	0.12861	0.120444	0.138818	0.09123	0.091889	0.101398	0.098061
1816.94	0.09058	0.099451	0.099389	0.08874	0.130446	0.128695	0.120452	0.138966	0.091501	0.091926	0.101323	0.097983
1818.87	0.090246	0.099019	0.099121	0.088394	0.130013	0.128278	0.120162	0.138708	0.090964	0.091446	0.10105	0.097648
1820.8	0.090079	0.0988	0.09905	0.088343	0.12993	0.128321	0.120167	0.138681	0.090905	0.091343	0.10113	0.097693
1822.73	0.090278	0.098974	0.099138	0.088565	0.13128	0.129372	0.121022	0.139508	0.092226	0.092179	0.101822	0.098506
1824.66	0.090343	0.098805	0.098844	0.088182	0.132258	0.129908	0.12116	0.139956	0.0934	0.092563	0.101805	0.098734
1826.59	0.089809	0.098495	0.098725	0.088002	0.131712	0.129448	0.12081	0.139481	0.092667	0.092124	0.101561	0.098413
1828.52	0.090168	0.098963	0.098841	0.088187	0.133294	0.130564	0.121677	0.140601	0.093537	0.093184	0.102337	0.099344
1830.45	0.089637	0.098257	0.098442	0.087464	0.133026	0.12999	0.120309	0.139851	0.093153	0.092756	0.101733	0.098687
1832.38	0.089134	0.098047	0.098446	0.08751	0.130774	0.128668	0.119798	0.138912	0.091217	0.091383	0.101083	0.097712
1834.3	0.089383	0.098404	0.098645	0.087795	0.130632	0.128781	0.120434	0.139486	0.091118	0.091392	0.101287	0.097877
1836.23	0.08953	0.098427	0.098713	0.087829	0.131198	0.129037	0.120517	0.139673	0.091598	0.091612	0.101391	0.098086
1838.16	0.089453	0.098336	0.09863	0.087738	0.13108	0.129011	0.120316	0.139444	0.091311	0.091474	0.101255	0.097925
1840.09	0.089315	0.098442	0.098712	0.087845	0.130947	0.129195	0.120733	0.139549	0.091019	0.091414	0.101351	0.098053
1842.02	0.090099	0.099266	0.099069	0.088237	0.133082	0.130941	0.122439	0.141142	0.093487	0.092966	0.102444	0.099444
1843.95	0.090323	0.099165	0.098927	0.087878	0.134844	0.131764	0.122534	0.141723	0.095403	0.09367	0.102774	0.099795
1845.88	0.089489	0.098342	0.09868	0.087473	0.13359	0.130577	0.121419	0.140488	0.093681	0.092734	0.102007	0.09872
1847.81	0.089315	0.09835	0.098673	0.087449	0.132461	0.129991	0.121051	0.140005	0.092194	0.092169	0.101682	0.098268
1849.73	0.08901	0.098096	0.098651	0.087408	0.131025	0.129104	0.120111	0.139264	0.090461	0.091092	0.10116	0.097594
1851.66	0.088921	0.098042	0.098655	0.087469	0.130349	0.12873	0.119889	0.139185	0.089569	0.090591	0.100926	0.097317
1853.59	0.088929	0.09808	0.098711	0.087484	0.130337	0.128684	0.120014	0.139301	0.089427	0.090533	0.100831	0.097334
1855.52	0.088893	0.098151	0.098737	0.087508	0.130406	0.128662	0.120122	0.139306	0.089335	0.090527	0.100838	0.097335
1857.45	0.088973	0.098308	0.098781	0.087391	0.130848	0.129002	0.120451	0.139563	0.089777	0.090811	0.100982	0.097458
1859.38	0.089079	0.098276	0.098825	0.087316	0.13103	0.129264	0.120452	0.139712	0.09012	0.091019	0.100976	0.097499
1861.31	0.089021	0.098209	0.098678	0.087377	0.130963	0.129182	0.120116	0.139632	0.090002	0.090913	0.100924	0.097493
1863.24	0.088865	0.098216	0.098698	0.087495	0.130916	0.129136	0.120232	0.139511	0.089871	0.090729	0.10088	0.097579
1865.17	0.089146	0.098548	0.09906	0.087752	0.132061	0.130075	0.121248	0.140373	0.09117	0.091542	0.101582	0.098374
1867.09	0.089906	0.099029	0.099269	0.087867	0.134863	0.131896	0.122291	0.142113	0.094021	0.093236	0.102771	0.099672
1869.02	0.08981	0.098683	0.098928	0.08731	0.135182	0.131736	0.1215	0.141922	0.094574	0.093248	0.102711	0.099401
1870.95	0.089111	0.098244	0.098811	0.087194	0.132338	0.129826	0.120473	0.14028	0.091568	0.091586	0.101658	0.098037
1872.88	0.089052	0.098449	0.099003	0.087567	0.131075	0.129237	0.120564	0.140027	0.089975	0.090879	0.101312	0.097746
1874.81	0.08914	0.098565	0.099141	0.087661	0.131048	0.129306	0.120655	0.140173	0.089858	0.090882	0.101437	0.09791
1876.74	0.089313	0.098721	0.099321	0.087697	0.131284	0.129587	0.120818	0.140471	0.090017	0.091057	0.101613	0.098104
1878.67	0.089374	0.098882	0.099441	0.087773	0.13164	0.129892	0.121086	0.140776	0.090313	0.091334	0.101751	0.098286
1880.6	0.089354	0.098937	0.099545	0.087838	0.131659	0.129854	0.121183	0.140765	0.090253	0.091325	0.101868	0.098319
1882.52	0.089479	0.099094	0.099697	0.087956	0.13182	0.129977	0.121247	0.141009	0.090415	0.091366	0.102077	0.098446
1884.45	0.089622	0.099159	0.099692	0.087982	0.132326	0.13031	0.121216	0.141278	0.09079	0.091643	0.102249	0.098603
1886.38	0.089619	0.099222	0.099743	0.088138	0.132467	0.130497	0.121502	0.14145	0.090905	0.091747	0.102374	0.098817
1888.31	0.089958	0.099536	0.099919	0.088283	0.133567	0.131247	0.122208	0.142297	0.092008	0.09246	0.102815	0.099506
1890.24	0.089645	0.099074	0.099781	0.087847	0.133529	0.130943	0.12159	0.141896	0.091775	0.092263	0.10246	0.099204
1892.17	0.089493	0.099087	0.099863	0.088015	0.132813	0.130687	0.121744	0.141645	0.090823	0.091806	0.102294	0.098894
1894.1	0.089827	0.099434	0.100026	0.088211	0.133539	0.131382	0.122309	0.142286	0.091563	0.092272	0.102701	0.099236
1896.03	0.089754	0.099258	0.099982	0.088009	0.133206	0.131076	0.121782	0.142008	0.091259	0.091976	0.102485	0.098902
1897.95	0.08963	0.099216	0.099913	0.088039	0.13242	0.130573	0.12143	0.141718	0.090247	0.091418	0.102261	0.098572
1899.88	0.089604	0.099217	0.099946	0.088104	0.132413	0.130574	0.121441	0.141775	0.090131	0.091336	0.102224	0.098578
1901.81	0.089645	0.099249	0.100062	0.08814	0.132556	0.130688	0.121631	0.14183	0.090183	0.091324	0.102212	0.09867
1903.74	0.089671	0.099319	0.100185	0.088263	0.132688	0.130756	0.121738	0.141847	0.090231	0.091272	0.102217	0.098706
1905.67	0.089679	0.099478	0.10028	0.0883	0.132924	0.130969	0.122029	0.142061	0.090564	0.091397	0.102367	0.098859
1907.6	0.090084	0.09973	0.100397	0.088365	0.133775	0.131637	0.122687	0.142702	0.09165	0.091983	0.10285	0.099373
1909.53	0.090109	0.099568	0.100333	0.088247	0.134062	0.131793	0.122363	0.142673	0.092106	0.092053	0.102886	0.099378
1911.46	0.089812	0.099443	0.100296	0.088198	0.133207	0.131188	0.121699	0.142174	0.09095	0.091493	0.102626	0.098963
1913.39	0.089902	0.099592	0.100376	0.088393	0.132947	0.131005	0.121747	0.142196	0.090381	0.091432	0.102651	0.098934
1915.31	0.090129	0.09991	0.100602	0.088676	0.133726	0.131702	0.122371	0.142774	0.091046	0.092043	0.103084	0.099467
1917.24	0.090399	0.10007	0.10066	0.088648	0.135086	0.132628	0.12293	0.143532	0.092327	0.092918	0.103489	0.099997
1919.17	0.090095	0.099819	0.100565	0.088444	0.134707	0.132138	0.122549	0.143154	0.092136	0.09259	0.103293	0.099715
1921.1	0.090619	0.100313	0.100885	0.088826	0.135313	0.132847	0.123416	0.143851	0.09296	0.093146	0.103966	0.100259
1923.03	0.090758	0.100373	0.100988	0.088709	0.136044	0.133287	0.123439	0.144086	0.093615	0.093637	0.104156	0.10045
1924.96	0.090304	0.100194	0.101077	0.088681	0.134408	0.132042	0.122631	0.143197	0.09164	0.092505	0.103463	0.099793
1926.89	0.090566	0.100583	0.101306	0.089013	0.133948	0.131962	0.122841	0.143501	0.091137	0.092323	0.103566	0.099859
1928.82	0.090673	0.100702	0.101332	0.089065	0.134069	0.132204	0.122909	0.143762	0.091346	0.09244	0.103667	0.099946
1930.74	0.090759	0.100858	0.101414	0.089287	0.134347	0.132419	0.12304	0.143924	0.091536	0.092545	0.103871	0.100081
1932.67	0.090899	0.101029	0.101538	0.08946	0.13471	0.13256	0.123123	0.144123	0.091855	0.092802	0.104042	0.100285
1934.6	0.091013	0.101092	0.101755	0.089535	0.134753	0.132582	0.1233	0.144245	0.09175	0.092898	0.104068	0.100394
1936.53	0.091151	0.101176	0.101876	0.089758	0.134831	0.132737	0.12362	0.144437	0.091701	0.092934	0.104233	0.100454
1938.46	0.091173	0.101325	0.101965	0.089936	0.135047	0.133022	0.123892	0.144644	0.091776	0.093068	0.10447	0.10064
1940.39	0.091586	0.10178	0.102239	0.090189	0.136303	0.134019	0.124795	0.145603	0.093317	0.093969	0.105164	0.101555
1942.32	0.091819	0.101865	0.102282	0.09006	0.137424	0.134597	0.12504	0.146123	0.094785	0.094552	0.105461	0.101968
1944.25	0.091447	0.101496	0.102186	0.089807	0.136633	0.13392	0.124264	0.14534	0.093423	0.093849	0.104965	0.101242
1946.18	0.091474	0.101462	0.102266	0.089824	0.136068	0.133619	0.124066	0.145258	0.09243	0.09341	0.104732	0.10111
1948.1	0.091409	0.101471	0.102404	0.089865	0.135662	0.133334	0.123772	0.145065	0.091921	0.093101	0.104542	0.101009
1950.03	0.091518	0.101576	0.102501	0.089989	0.135526	0.133304	0.123817	0.145004	0.091698	0.093015	0.104545	0.100884
1951.96	0.091594	0.101711	0.102533	0.09005	0.135629	0.133446	0.124069	0.145179	0.091676	0.093076	0.104645	0.100964
1953.89	0.091671	0.10189	0.102622	0.090109	0.135917	0.133703	0.124307	0.145465	0.091982	0.093251	0.104832	0.101052
1955.82	0.091726	0.101898	0.102705	0.090109	0.136058	0.133731	0.124307	0.14549	0.092054	0.093247	0.104811	0.101018
1957.75	0.091741	0.101805	0.102758	0.090255	0.135825	0.133683	0.124237	0.145348	0.091752	0.093149	0.104734	0.101015
1959.68	0.091811	0.101911	0.102789	0.090388	0.135868	0.133833	0.124351	0.145515	0.091895	0.093225	0.104913	0.101162
1961.61	0.091941	0.102081	0.102812	0.090448	0.136053	0.133914	0.124364	0.1457	0.092153	0.093233	0.105058	0.101306
1963.53	0.092026	0.102202	0.103049	0.090588	0.136234	0.134059	0.124514	0.145936	0.092364	0.093388	0.105194	0.101542
1965.46	0.09237	0.10251	0.103389	0.09076	0.137378	0.134932	0.125294	0.146795	0.093643	0.094238	0.105727	0.102077
1967.39	0.092402	0.102504	0.103365	0.09061	0.137787	0.135196	0.125403	0.146954	0.094236	0.094398	0.105781	0.102104
1969.32	0.092257	0.102458	0.103329	0.090615	0.136857	0.134561	0.125039	0.14646	0.092946	0.093841	0.105474	0.101734
1971.25	0.092351	0.102727	0.103424	0.090819	0.136656	0.134505	0.125027	0.146653	0.092598	0.093852	0.1056	0.101835
1973.18	0.092363	0.102934	0.103592	0.090871	0.136724	0.134651	0.125122	0.146854	0.092815	0.093926	0.105766	0.102091
1975.11	0.092485	0.103078	0.103824	0.090936	0.136912	0.134803	0.125268	0.146959	0.092929	0.094022	0.105973	0.102193
1977.04	0.092568	0.103129	0.103963	0.09105	0.137222	0.134949	0.125357	0.147037	0.093038	0.094124	0.106095	0.10229
1978.97	0.09272	0.10321	0.104051	0.091107	0.137432	0.135081	0.125593	0.147183	0.093112	0.094283	0.106182	0.102462
1980.89	0.092919	0.103348	0.104182	0.091258	0.137505	0.135207	0.125636	0.147331	0.093198	0.094464	0.106322	0.102647
1982.82	0.093028	0.10339	0.104372	0.091381	0.137639	0.135319	0.125633	0.147496	0.093368	0.094573	0.106485	0.102728
1984.75	0.093125	0.103508	0.104534	0.091552	0.137903	0.135583	0.125895	0.147751	0.093472	0.094659	0.106636	0.102818
1986.68	0.093375	0.103784	0.104679	0.091767	0.138533	0.136133	0.126249	0.148135	0.094168	0.095088	0.106939	0.103116
1988.61	0.093467	0.103894	0.104811	0.091827	0.138971	0.136422	0.126528	0.148488	0.09475	0.095463	0.107219	0.103428
1990.54	0.093678	0.104127	0.1049	0.091976	0.139629	0.136935	0.127102	0.149019	0.095221	0.095909	0.107584	0.103809
1992.47	0.093666	0.104111	0.10488	0.091835	0.13988	0.137011	0.12694	0.148921	0.095315	0.095965	0.107571	0.103638
1994.4	0.093417	0.104048	0.104916	0.091762	0.138843	0.13634	0.126329	0.148342	0.094071	0.0951	0.107074	0.103117
1996.32	0.093593	0.104325	0.105101	0.091912	0.138594	0.1363	0.126406	0.148463	0.09366	0.094883	0.107078	0.103205
1998.25	0.093691	0.104272	0.105167	0.092063	0.138685	0.136331	0.126555	0.148637	0.093778	0.094918	0.107094	0.103279
2000.18	0.093734	0.104263	0.105277	0.092193	0.13868	0.136326	0.126636	0.14867	0.093647	0.094763	0.107038	0.103264
2002.11	0.093866	0.104398	0.105467	0.092237	0.138768	0.136369	0.12663	0.148719	0.093602	0.094757	0.107038	0.103281
2004.04	0.094014	0.104519	0.105552	0.092336	0.138845	0.136421	0.126705	0.148866	0.093656	0.094883	0.107083	0.103347
2005.97	0.094085	0.104656	0.105628	0.0924	0.139077	0.136639	0.126836	0.149006	0.093753	0.095116	0.107206	0.103481
2007.9	0.094188	0.104798	0.105752	0.092539	0.139264	0.136888	0.127016	0.149175	0.093949	0.095268	0.107377	0.103619
2009.83	0.094365	0.104928	0.105858	0.092727	0.139314	0.136914	0.127155	0.149305	0.094041	0.095294	0.107565	0.103765
2011.76	0.094572	0.105131	0.106081	0.092898	0.139482	0.136995	0.127335	0.149487	0.094252	0.09545	0.107766	0.103958
2013.68	0.094783	0.105414	0.106336	0.093137	0.139784	0.137412	0.127657	0.149861	0.094709	0.095702	0.108089	0.104266
2015.61	0.095177	0.105833	0.106615	0.09339	0.140651	0.138149	0.128218	0.150558	0.095723	0.0964	0.108597	0.104855
2017.54	0.095373	0.105975	0.106798	0.0934	0.141342	0.138474	0.128458	0.150804	0.0963	0.096818	0.108828	0.104975
2019.47	0.095344	0.10605	0.107024	0.09348	0.141029	0.138283	0.128333	0.150636	0.09573	0.09659	0.108805	0.104871
2021.4	0.095569	0.106369	0.107398	0.093702	0.140941	0.138359	0.128494	0.150865	0.095546	0.096688	0.108938	0.105123
2023.33	0.095811	0.1066	0.107593	0.093953	0.141149	0.138494	0.1287	0.151103	0.095708	0.096893	0.109193	0.105274
2025.26	0.095957	0.106793	0.107726	0.094178	0.14129	0.13866	0.128841	0.151283	0.095867	0.096994	0.109366	0.105405
2027.19	0.096175	0.107032	0.107866	0.094277	0.141456	0.138918	0.129007	0.151536	0.096158	0.097096	0.109477	0.105579
2029.11	0.096383	0.107225	0.107972	0.094381	0.141555	0.13903	0.129135	0.151632	0.096198	0.097245	0.109599	0.105763
2031.04	0.096507	0.107362	0.108224	0.094653	0.141729	0.139157	0.12931	0.151814	0.096319	0.097367	0.109757	0.105987
2032.97	0.096674	0.107603	0.108475	0.09486	0.141869	0.139257	0.129399	0.152033	0.096416	0.097425	0.109965	0.10605
2034.9	0.096797	0.107841	0.10861	0.094983	0.142009	0.139381	0.129509	0.152205	0.096513	0.097587	0.110061	0.106077
2036.83	0.096913	0.107923	0.108802	0.095097	0.142206	0.139567	0.129686	0.152324	0.09666	0.097705	0.110161	0.106241
2038.76	0.097186	0.108104	0.108945	0.095186	0.142492	0.139877	0.129831	0.152479	0.096764	0.097883	0.110384	0.106462
2040.69	0.097377	0.108236	0.10903	0.095325	0.142935	0.140196	0.129992	0.152783	0.097149	0.098116	0.110577	0.106678
2042.62	0.097361	0.108219	0.109121	0.095398	0.142857	0.140052	0.129895	0.152721	0.097033	0.097932	0.110458	0.106577
2044.54	0.097454	0.10818	0.109141	0.095481	0.142614	0.139811	0.129792	0.152604	0.096736	0.097724	0.110345	0.106486
2046.47	0.09751	0.108289	0.109273	0.095552	0.142603	0.139775	0.129862	0.152593	0.09657	0.097743	0.110458	0.106573
2048.4	0.097447	0.108388	0.109352	0.095473	0.142584	0.13988	0.129868	0.152617	0.096432	0.097704	0.110442	0.106465
2050.33	0.097416	0.108362	0.10933	0.095477	0.142599	0.140009	0.12993	0.152692	0.096503	0.097712	0.110362	0.106395
2052.26	0.097491	0.108492	0.1094	0.095601	0.142608	0.140005	0.129915	0.152703	0.09652	0.097686	0.110425	0.106457
2054.19	0.097624	0.10865	0.109566	0.095745	0.142752	0.140029	0.130006	0.152798	0.096555	0.097728	0.110516	0.106501
2056.12	0.097638	0.108668	0.109633	0.095775	0.142819	0.140095	0.130107	0.15294	0.096617	0.097753	0.110557	0.106555
2058.05	0.09779	0.108666	0.10964	0.095685	0.142948	0.140227	0.13006	0.153103	0.096805	0.097858	0.110605	0.106641
2059.98	0.097871	0.108706	0.109747	0.095669	0.143126	0.140337	0.130059	0.15324	0.097085	0.098068	0.110702	0.106703
2061.9	0.097845	0.108775	0.109888	0.09579	0.143296	0.140462	0.130216	0.153457	0.097163	0.098184	0.110904	0.106924
2063.83	0.098055	0.108918	0.110003	0.095982	0.143814	0.140847	0.13068	0.153899	0.097703	0.098597	0.111294	0.107301
2065.76	0.098041	0.108974	0.109971	0.096055	0.143918	0.140831	0.130605	0.153868	0.09792	0.098666	0.111361	0.107339
2067.69	0.098039	0.109063	0.110037	0.096081	0.143715	0.140627	0.130392	0.153674	0.09747	0.098292	0.111173	0.107232
2069.62	0.098101	0.109226	0.110221	0.096128	0.143696	0.140758	0.13052	0.153796	0.097391	0.098327	0.111224	0.107344
2071.55	0.098076	0.109315	0.110314	0.096157	0.143765	0.140848	0.130726	0.153986	0.097552	0.098502	0.111337	0.107415
2073.48	0.09814	0.109272	0.110269	0.096148	0.143931	0.140927	0.13088	0.154116	0.097687	0.09858	0.111408	0.107412
2075.41	0.098105	0.109311	0.110254	0.096051	0.143929	0.140996	0.130774	0.154079	0.097624	0.09861	0.111444	0.107512
2077.33	0.098117	0.109439	0.110359	0.096022	0.143935	0.141029	0.130726	0.154089	0.09769	0.098604	0.111531	0.10752
2079.26	0.098179	0.109438	0.110392	0.096023	0.143967	0.140983	0.130759	0.154179	0.097617	0.09857	0.111584	0.107404
2081.19	0.098292	0.109467	0.11051	0.096108	0.144035	0.141024	0.130865	0.154264	0.097486	0.098568	0.111626	0.107386
2083.12	0.098298	0.109473	0.110576	0.096202	0.144069	0.141034	0.130893	0.154276	0.097534	0.09851	0.111574	0.107395
2085.05	0.098307	0.109566	0.110636	0.096249	0.144087	0.141025	0.130981	0.154393	0.097579	0.09844	0.111572	0.107494
2086.98	0.098326	0.109624	0.110635	0.096263	0.144209	0.141187	0.131073	0.154401	0.097549	0.098499	0.111623	0.107562
2088.91	0.098363	0.109625	0.110528	0.096206	0.144429	0.141405	0.131119	0.154428	0.097635	0.098631	0.111576	0.107508
2090.84	0.098291	0.109529	0.110479	0.096084	0.144356	0.141311	0.130951	0.154325	0.09749	0.098436	0.111427	0.107411
2092.77	0.098218	0.10946	0.110495	0.096113	0.144158	0.141049	0.130914	0.154218	0.097165	0.098172	0.111386	0.107379
2094.69	0.098275	0.109548	0.11065	0.096194	0.144173	0.141035	0.130999	0.154273	0.097127	0.098168	0.111363	0.107461
2096.62	0.098374	0.109654	0.110694	0.096154	0.144233	0.141103	0.131001	0.154265	0.097228	0.098172	0.111383	0.107508
2098.55	0.098444	0.109774	0.110678	0.096154	0.144335	0.141087	0.131078	0.154326	0.097279	0.098265	0.111521	0.107541
2100.48	0.098404	0.10978	0.110747	0.096122	0.144327	0.14115	0.131125	0.154328	0.09723	0.098306	0.111543	0.107572
2102.41	0.09843	0.109801	0.110741	0.096149	0.144367	0.141225	0.131194	0.154381	0.09725	0.098424	0.111535	0.107656
2104.34	0.098406	0.10988	0.110692	0.096113	0.144475	0.141183	0.131302	0.154489	0.097321	0.098455	0.111576	0.107775
2106.27	0.098484	0.10994	0.110762	0.096176	0.144478	0.141198	0.131446	0.154639	0.09749	0.098421	0.111779	0.107902
2108.2	0.098567	0.109984	0.110891	0.096356	0.144527	0.141322	0.131547	0.154785	0.097614	0.098499	0.111974	0.107819
2110.12	0.098632	0.110159	0.111084	0.096512	0.144597	0.141458	0.131634	0.154994	0.097753	0.098652	0.112061	0.107918
2112.05	0.098772	0.110345	0.111204	0.096567	0.14479	0.141666	0.131778	0.155257	0.097988	0.098871	0.112181	0.108167
2113.98	0.098925	0.110381	0.111237	0.096575	0.145108	0.141928	0.132056	0.155515	0.098223	0.099126	0.11237	0.108291
2115.91	0.098959	0.1104	0.111293	0.096641	0.145201	0.141849	0.132074	0.155586	0.098339	0.099233	0.112439	0.108346
2117.84	0.098956	0.110529	0.111303	0.096673	0.145151	0.141703	0.131994	0.155553	0.098289	0.099178	0.1125	0.108269
2119.77	0.099019	0.110629	0.111287	0.096652	0.145184	0.141835	0.132082	0.155618	0.098265	0.099222	0.112557	0.10833
2121.7	0.098992	0.110602	0.111416	0.09661	0.14536	0.141937	0.1321	0.155596	0.098222	0.099225	0.11256	0.10841
2123.63	0.099025	0.110599	0.111573	0.096726	0.145437	0.141949	0.132051	0.155632	0.098173	0.099295	0.112611	0.108422
2125.56	0.099067	0.110702	0.1116	0.096806	0.14546	0.142045	0.132135	0.155769	0.09829	0.099297	0.112637	0.108468
2127.48	0.099004	0.110754	0.111669	0.096913	0.145566	0.142092	0.132196	0.155934	0.098373	0.099195	0.11276	0.108584
2129.41	0.098985	0.110693	0.111691	0.096894	0.145604	0.142023	0.132104	0.155987	0.098335	0.099171	0.11275	0.108693
2131.34	0.099017	0.110765	0.111652	0.096799	0.145566	0.142026	0.13197	0.155912	0.098231	0.099181	0.11265	0.108715
2133.27	0.098923	0.110726	0.111608	0.096756	0.145499	0.14199	0.131858	0.155811	0.098144	0.099116	0.11252	0.108614
2135.2	0.098857	0.110646	0.111589	0.096667	0.145563	0.141979	0.131944	0.155826	0.098119	0.099062	0.112477	0.108499
2137.13	0.098845	0.110571	0.111513	0.096555	0.145528	0.141986	0.131845	0.155842	0.098018	0.098883	0.112437	0.108306
2139.06	0.098858	0.110592	0.111452	0.096515	0.145351	0.141973	0.131729	0.155777	0.097909	0.09881	0.112379	0.108306
2140.99	0.098768	0.110674	0.111483	0.096501	0.145275	0.141908	0.131767	0.155692	0.097751	0.098817	0.112367	0.108324
2142.91	0.098706	0.110639	0.111492	0.096395	0.145274	0.141775	0.131855	0.155622	0.097678	0.098686	0.112349	0.108221
2144.84	0.098751	0.110586	0.11144	0.096319	0.145259	0.141706	0.131783	0.155661	0.097582	0.098585	0.112399	0.108199
2146.77	0.098665	0.11046	0.111471	0.096249	0.145174	0.141585	0.13168	0.155615	0.097473	0.098557	0.11226	0.108175
2148.7	0.098575	0.110323	0.111403	0.096186	0.145066	0.141445	0.131724	0.155438	0.097413	0.098512	0.112128	0.10818
2150.63	0.098565	0.110323	0.111281	0.096227	0.145141	0.141483	0.131566	0.155426	0.097422	0.098474	0.112123	0.108189
2152.56	0.098533	0.110407	0.111302	0.096222	0.145144	0.141448	0.131352	0.155564	0.097385	0.098458	0.112095	0.108142
2154.49	0.098505	0.110435	0.1114	0.096231	0.144999	0.141293	0.131224	0.155572	0.097382	0.098377	0.112163	0.108148
2156.42	0.098509	0.110428	0.111444	0.096248	0.144945	0.141286	0.131172	0.155436	0.097462	0.098423	0.112224	0.108241
2158.35	0.09856	0.110438	0.111441	0.096239	0.144993	0.141406	0.131192	0.155522	0.097543	0.098533	0.112296	0.108243
2160.27	0.098527	0.110464	0.111375	0.096179	0.145046	0.141493	0.131191	0.15564	0.097634	0.09861	0.112295	0.108304
2162.2	0.098447	0.1105	0.111349	0.09605	0.144974	0.141441	0.131028	0.155602	0.09759	0.098553	0.112308	0.108417
2164.13	0.098294	0.110415	0.111303	0.095955	0.144808	0.141385	0.130739	0.155528	0.097487	0.098453	0.112326	0.108365
2166.06	0.098082	0.110295	0.111105	0.095888	0.144748	0.141345	0.130642	0.155375	0.097289	0.098372	0.112185	0.108201
2167.99	0.098021	0.110165	0.11097	0.095802	0.144786	0.141201	0.130567	0.155365	0.097193	0.098236	0.112013	0.10816
2169.92	0.097932	0.110038	0.110998	0.095715	0.144695	0.141056	0.130399	0.155446	0.097176	0.098231	0.111963	0.108128
2171.85	0.097818	0.109982	0.110974	0.095623	0.144616	0.141006	0.130243	0.155395	0.097104	0.098129	0.111956	0.108002
2173.78	0.097781	0.110027	0.110844	0.095469	0.14451	0.141047	0.130126	0.155216	0.097009	0.097993	0.111884	0.107988
2175.7	0.097515	0.109897	0.110756	0.095403	0.144337	0.140961	0.129921	0.15506	0.096727	0.097871	0.111843	0.107952
2177.63	0.097372	0.109704	0.110625	0.095313	0.144276	0.14074	0.129712	0.154996	0.096419	0.09774	0.11176	0.107844
2179.56	0.097323	0.10957	0.110489	0.095085	0.144185	0.140522	0.129593	0.15495	0.096205	0.097584	0.111552	0.107667
2181.49	0.097191	0.109372	0.110347	0.094916	0.144	0.140369	0.129297	0.154824	0.09604	0.097312	0.11128	0.107453
2183.42	0.097033	0.109284	0.110283	0.094746	0.143862	0.140299	0.129115	0.154623	0.095897	0.097052	0.111109	0.107247
2185.35	0.096891	0.109223	0.1102	0.094665	0.143813	0.140174	0.129041	0.154487	0.095852	0.096884	0.11098	0.107132
2187.28	0.096748	0.109152	0.110094	0.094653	0.143737	0.140073	0.128916	0.154387	0.095779	0.096872	0.110911	0.107127
2189.21	0.096588	0.109126	0.109935	0.094611	0.143702	0.140001	0.128915	0.154304	0.09563	0.096866	0.110888	0.107128
2191.13	0.096557	0.109139	0.109785	0.094501	0.143571	0.140036	0.128854	0.154358	0.095535	0.096709	0.110819	0.107058
2193.06	0.096522	0.108984	0.109793	0.094282	0.143369	0.139967	0.128758	0.154406	0.095425	0.09664	0.110832	0.107022
2194.99	0.096406	0.108792	0.109744	0.094073	0.143354	0.139784	0.128672	0.154239	0.095272	0.096508	0.110864	0.106983
2196.92	0.096364	0.108797	0.109654	0.094073	0.143288	0.139766	0.128532	0.154132	0.095185	0.096359	0.110757	0.106865
2198.85	0.096286	0.108706	0.109562	0.094162	0.143119	0.139667	0.128465	0.154085	0.095096	0.096314	0.11059	0.106733
2200.78	0.096156	0.108603	0.109389	0.094159	0.143099	0.139578	0.128428	0.154014	0.095045	0.096299	0.110607	0.10672
2202.71	0.096127	0.108711	0.109406	0.094108	0.143159	0.139525	0.128419	0.154144	0.095136	0.096384	0.110697	0.106774
2204.64	0.096108	0.10876	0.109595	0.094021	0.143287	0.139536	0.128508	0.154272	0.09524	0.096509	0.110756	0.106863
2206.57	0.096108	0.10872	0.109638	0.093976	0.143321	0.139576	0.128489	0.154231	0.09533	0.096588	0.110856	0.106962
2208.49	0.096122	0.108743	0.109685	0.093892	0.143312	0.139598	0.128523	0.154371	0.095438	0.096571	0.110962	0.107013
2210.42	0.096067	0.108711	0.109773	0.093733	0.143335	0.139613	0.128537	0.154511	0.095471	0.096523	0.111024	0.107063
2212.35	0.09598	0.108679	0.109665	0.09373	0.143317	0.139614	0.128466	0.15451	0.095488	0.096522	0.110976	0.107141
2214.28	0.095949	0.108649	0.109512	0.093779	0.143368	0.139577	0.128389	0.154447	0.095464	0.096553	0.110981	0.10719
2216.21	0.0959	0.108737	0.109529	0.09387	0.143461	0.139579	0.128303	0.154384	0.09528	0.096595	0.111078	0.107185
2218.14	0.095843	0.108814	0.109522	0.093949	0.143409	0.139606	0.128356	0.154504	0.095256	0.096573	0.111031	0.107173
2220.07	0.095869	0.108778	0.109499	0.09388	0.143398	0.13966	0.128445	0.15461	0.095383	0.096543	0.111016	0.107228
2222	0.095884	0.108844	0.109533	0.093889	0.143523	0.139701	0.128385	0.154648	0.095326	0.096604	0.111	0.10724
2223.92	0.09591	0.10896	0.109663	0.093935	0.143517	0.139655	0.12841	0.154681	0.095339	0.096609	0.110925	0.107214
2225.85	0.095892	0.10891	0.109674	0.093776	0.143486	0.1396	0.128341	0.154702	0.095301	0.0966	0.111027	0.107203
2227.78	0.095896	0.108748	0.109665	0.093701	0.143422	0.139565	0.128212	0.154713	0.09511	0.096557	0.111025	0.107151
2229.71	0.095942	0.108726	0.109629	0.093794	0.143364	0.139549	0.12815	0.154605	0.095012	0.096399	0.110891	0.107179
2231.64	0.095803	0.108709	0.109525	0.093801	0.143349	0.139457	0.128111	0.154513	0.094943	0.096239	0.110871	0.10711
2233.57	0.095678	0.108706	0.109569	0.093766	0.143272	0.139369	0.128013	0.154504	0.094873	0.096185	0.110891	0.106955
2235.5	0.095716	0.108719	0.10966	0.093701	0.143229	0.13928	0.12793	0.154459	0.094747	0.096094	0.110764	0.10692
2237.43	0.09573	0.108707	0.109606	0.093671	0.143213	0.139346	0.128007	0.15442	0.094647	0.096009	0.110728	0.106956
2239.36	0.095705	0.108743	0.109637	0.093736	0.143117	0.139501	0.128081	0.154564	0.094651	0.096056	0.110885	0.107044
2241.28	0.095624	0.108758	0.109692	0.093651	0.143075	0.139443	0.128065	0.154696	0.094692	0.096061	0.110839	0.107081
2243.21	0.095583	0.108775	0.10961	0.0936	0.143124	0.139337	0.128	0.154679	0.094665	0.096037	0.110777	0.107051
2245.14	0.095586	0.108813	0.109543	0.093609	0.143146	0.139304	0.128029	0.154689	0.094583	0.096013	0.110829	0.107041
2247.07	0.095628	0.108727	0.10951	0.093656	0.143134	0.139312	0.127987	0.154703	0.094459	0.09594	0.110906	0.107047
2249	0.095595	0.108632	0.109469	0.093808	0.143083	0.139277	0.127947	0.154588	0.094427	0.095769	0.110939	0.107113
2250.93	0.095467	0.108676	0.109534	0.093751	0.143103	0.139242	0.127942	0.15456	0.094535	0.095793	0.111087	0.107176
2252.86	0.095505	0.108722	0.109741	0.093689	0.143207	0.139306	0.127947	0.154755	0.094696	0.095958	0.111187	0.107219
2254.79	0.095479	0.108817	0.109798	0.09381	0.143304	0.139397	0.127987	0.154913	0.094709	0.09602	0.111108	0.107287
2256.71	0.095475	0.108861	0.109765	0.093902	0.143233	0.139351	0.128084	0.154934	0.094695	0.096085	0.111193	0.107327
2258.64	0.095549	0.108777	0.109827	0.093996	0.143221	0.139356	0.128044	0.154994	0.094744	0.096129	0.111299	0.10727
2260.57	0.095465	0.108774	0.10978	0.093914	0.143289	0.139419	0.127879	0.155077	0.09468	0.09626	0.111271	0.107283
2262.5	0.095437	0.108931	0.109779	0.093836	0.143251	0.139378	0.127825	0.15498	0.094602	0.096223	0.111275	0.107384
2264.43	0.095456	0.108961	0.109807	0.09395	0.14312	0.139303	0.127805	0.154955	0.09442	0.096085	0.11128	0.107405
2266.36	0.095373	0.10882	0.109719	0.093915	0.143004	0.139273	0.127786	0.155013	0.094276	0.096062	0.111207	0.107354
2268.29	0.095284	0.108831	0.109603	0.093849	0.143093	0.139291	0.127809	0.154957	0.094227	0.095996	0.111139	0.107273
2270.22	0.09524	0.108778	0.109695	0.093858	0.143233	0.139306	0.127785	0.154947	0.094102	0.09604	0.111229	0.107305
2272.15	0.095244	0.108752	0.109898	0.093822	0.143236	0.139426	0.127743	0.155014	0.094074	0.096061	0.111348	0.107439
2274.07	0.095306	0.108865	0.109793	0.093809	0.143185	0.13947	0.127733	0.154975	0.094158	0.096044	0.111374	0.10745
2276	0.095252	0.108889	0.109808	0.093781	0.143186	0.139418	0.127704	0.154883	0.094103	0.096119	0.111483	0.10739
2277.93	0.09527	0.10891	0.109909	0.093757	0.14328	0.139407	0.127631	0.154986	0.094112	0.095967	0.111474	0.107384
2279.86	0.0954	0.108926	0.109915	0.09375	0.143264	0.13935	0.127502	0.155185	0.094152	0.095873	0.111357	0.10737
2281.79	0.095451	0.108991	0.109978	0.09374	0.143258	0.13933	0.127592	0.155158	0.094173	0.095991	0.111423	0.107495
2283.72	0.095395	0.109111	0.110117	0.09376	0.143304	0.139476	0.127799	0.155046	0.094214	0.095984	0.111527	0.107528
2285.65	0.095356	0.1091	0.1102	0.093911	0.14326	0.139591	0.127946	0.155122	0.094031	0.095956	0.111576	0.107529
2287.58	0.095427	0.109091	0.110183	0.094106	0.143266	0.139557	0.12801	0.155253	0.093878	0.096058	0.111629	0.107416
2289.5	0.095427	0.109191	0.1102	0.094294	0.143265	0.139629	0.128128	0.155325	0.093897	0.09607	0.111709	0.107325
2291.43	0.095295	0.109221	0.110303	0.094562	0.143262	0.139814	0.128272	0.155273	0.0938	0.096062	0.111792	0.107456
2293.36	0.095109	0.109092	0.110341	0.094787	0.143209	0.139949	0.128348	0.155321	0.093715	0.096123	0.111874	0.107396
2295.29	0.094937	0.108976	0.110307	0.094868	0.143155	0.140086	0.128476	0.155287	0.09357	0.096032	0.111975	0.107218
2297.22	0.094808	0.109047	0.110369	0.095027	0.143248	0.140229	0.128589	0.155201	0.093423	0.095975	0.111929	0.10724
2299.15	0.094785	0.109061	0.110392	0.095306	0.143233	0.140322	0.128781	0.155348	0.093349	0.096001	0.111852	0.107197
2301.08	0.094679	0.108973	0.110295	0.095486	0.14313	0.140405	0.129073	0.15535	0.093183	0.096068	0.112037	0.107098
2303.01	0.094451	0.109055	0.110205	0.095815	0.143182	0.14063	0.129383	0.155209	0.093121	0.096094	0.112237	0.107197
2304.94	0.094281	0.10917	0.110376	0.096216	0.143215	0.140907	0.129777	0.155409	0.093052	0.096259	0.112416	0.107242
2306.86	0.094054	0.109058	0.110468	0.096498	0.143113	0.141046	0.13001	0.155624	0.092695	0.096257	0.11255	0.107051
2308.79	0.093567	0.108883	0.110505	0.096842	0.14283	0.141198	0.130051	0.155521	0.092083	0.09604	0.112546	0.106801
2310.72	0.093185	0.108701	0.110639	0.097118	0.142423	0.14134	0.130083	0.155442	0.09124	0.095838	0.112601	0.10677
2312.65	0.093065	0.108541	0.110489	0.097157	0.142102	0.141266	0.130105	0.155294	0.090626	0.095363	0.112649	0.106591
2314.58	0.092807	0.10838	0.110275	0.097289	0.141827	0.141153	0.130127	0.154952	0.090062	0.094912	0.112494	0.106376
2316.51	0.092381	0.108287	0.110197	0.097702	0.141472	0.141257	0.130259	0.154726	0.089124	0.094677	0.112199	0.106145
2318.44	0.091658	0.108089	0.110035	0.098272	0.141006	0.141475	0.130435	0.154484	0.087662	0.094319	0.11196	0.105573
2320.37	0.090971	0.107548	0.109999	0.098688	0.140638	0.141481	0.130577	0.154103	0.085678	0.093662	0.11181	0.104977
2322.29	0.090716	0.107262	0.109936	0.098974	0.140129	0.141348	0.130521	0.153861	0.084332	0.093066	0.111659	0.104849
2324.22	0.090503	0.107423	0.109812	0.099133	0.139476	0.141208	0.130185	0.153839	0.083244	0.092377	0.111658	0.104881
2326.15	0.090124	0.107433	0.10969	0.099141	0.138757	0.141045	0.130224	0.153716	0.081903	0.091733	0.111598	0.104749
2328.08	0.089633	0.107138	0.109668	0.099464	0.138195	0.141046	0.130424	0.153304	0.080738	0.091098	0.111216	0.104464
2330.01	0.089059	0.106709	0.10958	0.099739	0.137806	0.140786	0.130197	0.152832	0.079473	0.090596	0.110883	0.104128
2331.94	0.088718	0.106659	0.10939	0.099542	0.13742	0.14048	0.129643	0.15272	0.078153	0.09015	0.110654	0.104054
2333.87	0.088894	0.106749	0.109335	0.099557	0.13723	0.140548	0.129704	0.152902	0.077392	0.089534	0.110412	0.103762
2335.8	0.089047	0.10673	0.109292	0.099946	0.136791	0.140675	0.130087	0.152884	0.076869	0.089482	0.110483	0.103711
2337.72	0.088882	0.10673	0.109231	0.100249	0.136592	0.140679	0.13	0.152641	0.076361	0.08942	0.110655	0.103851
2339.65	0.088705	0.106562	0.109396	0.10036	0.13668	0.140658	0.130147	0.152734	0.076195	0.089133	0.11086	0.103651
2341.58	0.088528	0.106585	0.10977	0.100369	0.136754	0.140633	0.130267	0.152816	0.076143	0.089288	0.111	0.103568
2343.51	0.088744	0.106765	0.1099	0.100621	0.137001	0.140737	0.130296	0.1531	0.077179	0.089832	0.111088	0.103692
2345.44	0.08948	0.106982	0.110022	0.100248	0.137872	0.140581	0.129979	0.153558	0.079101	0.090463	0.111021	0.103956
2347.37	0.090968	0.108044	0.110739	0.099688	0.139667	0.141145	0.130116	0.154262	0.082593	0.092119	0.111718	0.10509
2349.3	0.091787	0.108871	0.111238	0.100322	0.140606	0.142332	0.131356	0.155327	0.084208	0.093476	0.112716	0.106173
2351.23	0.09075	0.108389	0.110876	0.101188	0.139587	0.142508	0.132262	0.155143	0.081448	0.0925	0.112637	0.105857
2353.16	0.089202	0.107451	0.110483	0.10163	0.138211	0.141952	0.132004	0.153973	0.077607	0.090722	0.11221	0.104869
2355.08	0.088308	0.106886	0.110265	0.102425	0.137178	0.141691	0.13167	0.153447	0.074678	0.089368	0.111786	0.10399
2357.01	0.087897	0.106505	0.110119	0.102928	0.136178	0.141527	0.131833	0.153031	0.072221	0.088325	0.111707	0.103348
2358.94	0.087465	0.106435	0.110052	0.102969	0.135914	0.141812	0.131669	0.152899	0.071599	0.088046	0.111569	0.103147
2360.87	0.087298	0.10675	0.109875	0.103163	0.136	0.141768	0.131304	0.153222	0.071757	0.088037	0.111095	0.103143
2362.8	0.087468	0.106957	0.110016	0.103216	0.136476	0.141692	0.131291	0.153379	0.072631	0.088604	0.110973	0.103611
2364.73	0.087983	0.107268	0.110582	0.102776	0.13688	0.141838	0.131097	0.153647	0.074607	0.088977	0.111512	0.104156
2366.66	0.089221	0.108067	0.111188	0.102469	0.13786	0.141808	0.130725	0.154331	0.076404	0.090123	0.11224	0.104928
2368.59	0.090666	0.10877	0.111744	0.10197	0.139351	0.142235	0.130675	0.155062	0.079118	0.091838	0.1127	0.105799
2370.51	0.091795	0.109362	0.112417	0.101341	0.140628	0.142723	0.131115	0.155756	0.082956	0.092874	0.113355	0.106555
2372.44	0.093026	0.110349	0.112924	0.100999	0.141946	0.143045	0.131689	0.156748	0.086315	0.093687	0.114021	0.107508
2374.37	0.094593	0.111237	0.113361	0.100713	0.143126	0.143326	0.131953	0.157752	0.089104	0.095261	0.114752	0.108613
2376.3	0.095764	0.112092	0.113941	0.100349	0.144243	0.143613	0.131993	0.158635	0.091712	0.096706	0.115237	0.109649
2378.23	0.096817	0.113019	0.114521	0.099963	0.145516	0.143889	0.131953	0.1594	0.093845	0.097756	0.115607	0.110448
2380.16	0.097874	0.11368	0.115032	0.099728	0.146661	0.144004	0.131739	0.160053	0.095618	0.09891	0.116048	0.111212
2382.09	0.098829	0.114306	0.115572	0.099509	0.147472	0.144072	0.131655	0.160621	0.096859	0.099688	0.116549	0.112011
2384.02	0.099697	0.114953	0.116092	0.099461	0.1479	0.14417	0.131606	0.161147	0.09773	0.100077	0.116963	0.112678
2385.95	0.100375	0.115357	0.116395	0.099435	0.148361	0.1442	0.131557	0.161507	0.098385	0.100302	0.117209	0.113195
2387.87	0.100961	0.115603	0.116551	0.09936	0.148742	0.144221	0.131771	0.161743	0.098743	0.100543	0.117506	0.113577
2389.8	0.101377	0.115975	0.116822	0.09957	0.148985	0.144471	0.131994	0.162176	0.099045	0.100893	0.117787	0.113899
2391.73	0.101615	0.116306	0.117081	0.09988	0.149227	0.144821	0.132122	0.162569	0.099326	0.101164	0.117993	0.114246
2393.66	0.101696	0.116538	0.11717	0.100118	0.149413	0.14501	0.132271	0.162768	0.099523	0.101343	0.118107	0.114593
2395.59	0.101725	0.116796	0.117419	0.1002	0.149719	0.145075	0.132508	0.162724	0.099595	0.101533	0.118329	0.114758
2397.52	0.101971	0.117062	0.117681	0.100172	0.149918	0.145229	0.132654	0.162919	0.099718	0.101788	0.118724	0.114887
2399.45	0.102172	0.117197	0.117773	0.100313	0.150083	0.145364	0.132702	0.163198	0.100013	0.101917	0.118867	0.115065
2401.38	0.102356	0.117307	0.117942	0.100507	0.150306	0.145429	0.132817	0.163386	0.10022	0.102029	0.119029	0.11525
2403.3	0.102585	0.117534	0.118226	0.100736	0.150497	0.145623	0.132937	0.163648	0.100362	0.102355	0.119347	0.115478
2405.23	0.102789	0.117785	0.11851	0.101091	0.150644	0.145954	0.133183	0.163885	0.100558	0.102558	0.119547	0.115618
2407.16	0.103108	0.118036	0.118812	0.101287	0.150756	0.146203	0.133518	0.164285	0.100781	0.102731	0.1198	0.115749
2409.09	0.103405	0.1183	0.119199	0.101355	0.151049	0.146354	0.133773	0.164571	0.100965	0.103045	0.120055	0.115992
2411.02	0.103645	0.118621	0.119411	0.101543	0.151286	0.146588	0.133902	0.16477	0.10117	0.103216	0.120239	0.116258
2412.95	0.103801	0.118885	0.119487	0.101771	0.151389	0.146717	0.134034	0.16497	0.101469	0.10332	0.120421	0.116507
2414.88	0.103906	0.119078	0.119576	0.101946	0.15164	0.146843	0.13407	0.165034	0.101655	0.103493	0.120601	0.116725
2416.81	0.1041	0.119283	0.119846	0.102063	0.151838	0.146993	0.134145	0.16514	0.101793	0.103586	0.120828	0.116894
2418.74	0.104365	0.11945	0.120262	0.102329	0.151949	0.147127	0.134438	0.165426	0.101847	0.103658	0.121039	0.117021
2420.66	0.104677	0.119669	0.120625	0.102635	0.152175	0.147378	0.134715	0.165736	0.101896	0.103917	0.121152	0.117172
2422.59	0.104978	0.120029	0.120856	0.102794	0.152501	0.147732	0.134976	0.165976	0.102047	0.104124	0.121349	0.117467
2424.52	0.105298	0.120425	0.121009	0.103081	0.152704	0.148045	0.135214	0.166275	0.102184	0.104325	0.121626	0.117881
2426.45	0.105578	0.120814	0.121314	0.103502	0.152843	0.148362	0.135506	0.16663	0.102464	0.104555	0.121891	0.118159
2428.38	0.105887	0.121118	0.121734	0.103884	0.153165	0.148634	0.135818	0.166833	0.102847	0.104779	0.122167	0.118401
2430.31	0.106139	0.121378	0.122122	0.104012	0.153547	0.148808	0.135949	0.167079	0.103159	0.105052	0.122485	0.118541
2432.24	0.106336	0.121731	0.122378	0.104219	0.153803	0.148927	0.136034	0.167499	0.103363	0.105401	0.122815	0.118718
2434.17	0.106633	0.12208	0.122557	0.104596	0.153982	0.149122	0.136278	0.167765	0.103466	0.105606	0.122935	0.119074
2436.09	0.106863	0.122421	0.122798	0.104856	0.154096	0.14944	0.136567	0.168031	0.103743	0.10573	0.123181	0.119358
2438.02	0.107164	0.122771	0.123178	0.105175	0.154355	0.149711	0.136871	0.168387	0.104116	0.105922	0.123554	0.119741
2439.95	0.107589	0.123127	0.123609	0.105541	0.154795	0.150017	0.137209	0.168735	0.104465	0.106244	0.123852	0.120054
2441.88	0.107913	0.123431	0.123919	0.105864	0.155153	0.150269	0.137453	0.169152	0.104799	0.106644	0.124202	0.120249
2443.81	0.108188	0.123728	0.124196	0.106172	0.155429	0.150535	0.137887	0.169472	0.105044	0.106951	0.124511	0.120536
2445.74	0.108511	0.124061	0.124516	0.106412	0.155672	0.150882	0.1382	0.169662	0.105387	0.107328	0.124811	0.120914
2447.67	0.108783	0.124353	0.124908	0.106593	0.155937	0.151251	0.138361	0.169945	0.105745	0.107652	0.125143	0.121227
2449.6	0.108995	0.124591	0.125144	0.10684	0.156206	0.151474	0.138576	0.170281	0.105949	0.107869	0.125407	0.121329
2451.53	0.109292	0.12494	0.125237	0.107147	0.156482	0.151598	0.138688	0.170585	0.106148	0.108193	0.125561	0.121534
2453.45	0.109574	0.125329	0.125419	0.107347	0.156606	0.151843	0.138831	0.170771	0.10633	0.108398	0.125791	0.121771
2455.38	0.109767	0.125485	0.125709	0.107588	0.156872	0.152119	0.139109	0.17095	0.106499	0.108509	0.126081	0.122041
2457.31	0.110026	0.125686	0.126128	0.1079	0.157232	0.152264	0.139396	0.171319	0.106805	0.108821	0.126257	0.122394
2459.24	0.110355	0.126106	0.126534	0.108364	0.157496	0.152511	0.139672	0.17164	0.107136	0.109031	0.126545	0.122646
2461.17	0.110677	0.126417	0.126801	0.108687	0.157818	0.152821	0.139884	0.171983	0.107413	0.109248	0.126857	0.122917
2463.1	0.110895	0.126587	0.127114	0.108893	0.158008	0.153033	0.14002	0.172257	0.107539	0.109543	0.127123	0.123199
2465.03	0.111142	0.126862	0.127337	0.109163	0.158178	0.153292	0.140309	0.172376	0.107727	0.109752	0.127325	0.123439
2466.96	0.111431	0.127161	0.127555	0.109358	0.158374	0.153534	0.140429	0.172594	0.107836	0.10998	0.127539	0.123742
2468.88	0.11162	0.127467	0.12784	0.109689	0.158715	0.153783	0.140504	0.172911	0.108032	0.11015	0.127825	0.124031
2470.81	0.111919	0.127906	0.128089	0.109924	0.158997	0.154086	0.140783	0.173186	0.108406	0.110323	0.128015	0.124175
2472.74	0.11227	0.128072	0.128453	0.110104	0.159172	0.154311	0.141087	0.173438	0.108568	0.110556	0.128213	0.124279
2474.67	0.112629	0.128353	0.128754	0.110426	0.159568	0.154526	0.141494	0.173842	0.108817	0.110702	0.128496	0.124523
2476.6	0.113038	0.128858	0.129186	0.11085	0.15987	0.154885	0.141963	0.174222	0.109104	0.111018	0.128826	0.124887
2478.53	0.113509	0.12921	0.129647	0.11127	0.160182	0.155313	0.142261	0.17468	0.109432	0.111317	0.129084	0.125245
2480.46	0.113882	0.129508	0.130018	0.111578	0.160479	0.155595	0.142508	0.175021	0.10976	0.11157	0.129361	0.125613
2482.39	0.11409	0.129817	0.130281	0.111844	0.160724	0.155726	0.142763	0.175222	0.109998	0.111978	0.129689	0.125945
2484.32	0.114336	0.130212	0.130502	0.112006	0.161082	0.155941	0.142984	0.175533	0.110308	0.112244	0.1301	0.126209
2486.24	0.114539	0.130535	0.130801	0.112232	0.161436	0.156238	0.143229	0.175717	0.110685	0.112415	0.130489	0.126483
2488.17	0.114717	0.130781	0.131111	0.112484	0.161696	0.156436	0.143407	0.175984	0.110783	0.112657	0.130666	0.126779
2490.1	0.114981	0.131017	0.131402	0.112696	0.161942	0.156763	0.143658	0.176458	0.11092	0.112867	0.130929	0.127077
2492.03	0.11519	0.131301	0.131751	0.112974	0.162257	0.157118	0.143987	0.17683	0.111375	0.113213	0.131301	0.127343
2493.96	0.11545	0.131818	0.132118	0.113306	0.162608	0.157319	0.144228	0.177176	0.111719	0.113567	0.131648	0.127653
2495.89	0.115939	0.132157	0.13233	0.113638	0.162962	0.157661	0.144546	0.177667	0.112044	0.113824	0.132029	0.128009
2497.82	0.116375	0.132303	0.132561	0.114064	0.163212	0.158011	0.144885	0.178081	0.112381	0.114164	0.132286	0.128322
2499.75	0.116659	0.132683	0.132894	0.114454	0.163442	0.158286	0.145209	0.178252	0.112675	0.114478	0.132541	0.128702
2501.67	0.116828	0.132933	0.133222	0.114597	0.163746	0.158583	0.145363	0.178472	0.11302	0.114685	0.132832	0.128966
2503.6	0.11693	0.133293	0.133518	0.114687	0.164167	0.158855	0.145466	0.178785	0.113286	0.114949	0.133036	0.129118
2505.53	0.117119	0.133719	0.13385	0.114934	0.164558	0.159104	0.145768	0.179156	0.113518	0.115224	0.133235	0.129404
2507.46	0.117483	0.134005	0.134122	0.11524	0.164743	0.159407	0.145964	0.17951	0.113653	0.115407	0.133492	0.12972
2509.39	0.117883	0.134292	0.134412	0.11557	0.164985	0.159647	0.146258	0.179836	0.113754	0.115709	0.133831	0.129917
2511.32	0.118142	0.134463	0.134734	0.116032	0.165344	0.159896	0.146685	0.180175	0.114041	0.115932	0.134053	0.130191
2513.25	0.118601	0.134903	0.135098	0.116405	0.165602	0.160215	0.146994	0.180416	0.114317	0.116072	0.134263	0.130499
2515.18	0.118966	0.135315	0.135493	0.116615	0.165906	0.160521	0.14727	0.180706	0.114462	0.116345	0.13464	0.130708
2517.1	0.119129	0.135415	0.135666	0.116929	0.166248	0.160885	0.147609	0.181001	0.114631	0.116515	0.134973	0.130887
2519.03	0.119362	0.135513	0.135926	0.11712	0.166444	0.161094	0.147757	0.181259	0.114802	0.116591	0.13508	0.131127
2520.96	0.119533	0.135733	0.136248	0.117277	0.166636	0.161195	0.147905	0.181504	0.115018	0.11685	0.135196	0.131257
2522.89	0.119755	0.136	0.136427	0.11759	0.166666	0.161385	0.148033	0.181725	0.115214	0.117029	0.135498	0.131441
2524.82	0.120048	0.136165	0.136647	0.117839	0.16681	0.161736	0.148169	0.182003	0.115297	0.117289	0.135771	0.131923
2526.75	0.120497	0.136361	0.136912	0.118097	0.167142	0.161898	0.148361	0.182319	0.115395	0.117577	0.135898	0.132202
2528.68	0.120951	0.136766	0.137205	0.11847	0.167403	0.162074	0.148638	0.182551	0.115712	0.1177	0.136196	0.132442
2530.61	0.121183	0.137203	0.137654	0.118888	0.167709	0.162556	0.149058	0.182815	0.116148	0.117957	0.136601	0.132595
2532.54	0.121468	0.137639	0.138097	0.11911	0.1681	0.162829	0.149371	0.183228	0.116485	0.118218	0.136884	0.132781
2534.46	0.121814	0.138162	0.138439	0.119314	0.16837	0.162977	0.149681	0.183589	0.116689	0.118544	0.137184	0.133328
2536.39	0.12201	0.138448	0.138731	0.119472	0.16869	0.163124	0.14991	0.183918	0.117023	0.119009	0.137495	0.13361
2538.32	0.122165	0.138497	0.13896	0.119646	0.169001	0.163328	0.150004	0.184202	0.117473	0.119231	0.137644	0.133685
2540.25	0.122397	0.138745	0.139034	0.11985	0.169175	0.163565	0.150132	0.184457	0.117681	0.119411	0.137891	0.133954
2542.18	0.122644	0.139131	0.139196	0.120138	0.169476	0.163751	0.150231	0.184579	0.117774	0.119585	0.138202	0.134266
2544.11	0.122868	0.139403	0.139436	0.12052	0.169654	0.164014	0.150397	0.184799	0.117978	0.119779	0.138331	0.134506
2546.04	0.123235	0.139756	0.139784	0.120705	0.169842	0.164277	0.150706	0.185298	0.118282	0.120138	0.138551	0.1348
2547.97	0.123546	0.140151	0.140303	0.120977	0.170234	0.164553	0.15091	0.185622	0.118488	0.120312	0.13884	0.135045
2549.89	0.123682	0.140448	0.140605	0.121312	0.170601	0.164806	0.151093	0.185829	0.118586	0.120554	0.139111	0.135318
2551.82	0.12397	0.140783	0.14086	0.121472	0.170781	0.165178	0.151312	0.186077	0.118946	0.120882	0.139467	0.135634
2553.75	0.124272	0.141026	0.141204	0.121592	0.170971	0.165563	0.151605	0.186302	0.119164	0.121041	0.1398	0.135891
2555.68	0.124557	0.141157	0.141488	0.121742	0.171274	0.165626	0.151787	0.186583	0.119201	0.121204	0.139963	0.136184
2557.61	0.124737	0.141492	0.141708	0.12194	0.171496	0.165722	0.151912	0.186697	0.11953	0.121292	0.140091	0.136307
2559.54	0.12487	0.141707	0.141895	0.122212	0.171604	0.165856	0.151992	0.186825	0.119725	0.121483	0.140127	0.136406
2561.47	0.1251	0.141747	0.141973	0.122602	0.171728	0.166077	0.152143	0.187167	0.11986	0.121748	0.140224	0.136513
2563.4	0.1254	0.142097	0.142238	0.122913	0.171971	0.166444	0.152428	0.187539	0.119958	0.121825	0.140483	0.136661
2565.33	0.125749	0.142462	0.142717	0.123173	0.172238	0.166657	0.152592	0.187886	0.119937	0.121866	0.140665	0.136916
2567.25	0.126023	0.142669	0.14296	0.123435	0.172541	0.166808	0.152926	0.188044	0.12015	0.12203	0.140947	0.137125
2569.18	0.126322	0.142969	0.143224	0.123722	0.172822	0.167049	0.153189	0.188367	0.120457	0.122272	0.141181	0.137345
2571.11	0.126716	0.143324	0.143551	0.124058	0.173065	0.167331	0.153444	0.188721	0.120709	0.122614	0.141443	0.137702
2573.04	0.127015	0.14364	0.143906	0.124302	0.173316	0.167481	0.15374	0.189084	0.120925	0.12284	0.141759	0.137938
2574.97	0.127086	0.14383	0.144306	0.124416	0.173606	0.167704	0.153984	0.189407	0.121222	0.123056	0.142031	0.138129
2576.9	0.12744	0.144163	0.144426	0.124685	0.17389	0.167981	0.154268	0.189642	0.121562	0.123406	0.142432	0.138365
2578.83	0.127877	0.144676	0.144813	0.125108	0.174141	0.168319	0.154628	0.189963	0.121828	0.123566	0.142588	0.138607
2580.76	0.128213	0.145116	0.145141	0.12555	0.174512	0.168704	0.155094	0.190284	0.122185	0.123931	0.142807	0.139072
2582.68	0.128685	0.145504	0.145485	0.125991	0.175053	0.169052	0.155423	0.190709	0.122657	0.124435	0.143378	0.139576
2584.61	0.129033	0.145886	0.146017	0.12637	0.175515	0.169542	0.155832	0.191251	0.123012	0.124835	0.143696	0.139922
2586.54	0.129452	0.146379	0.146486	0.126765	0.175947	0.169938	0.156233	0.191855	0.123366	0.125233	0.144091	0.140365
2588.47	0.129839	0.146963	0.146871	0.127126	0.176388	0.170405	0.15666	0.192272	0.123758	0.125521	0.144669	0.140768
2590.4	0.13021	0.147422	0.147272	0.127593	0.176628	0.170847	0.15717	0.192696	0.12422	0.125817	0.145095	0.141116
2592.33	0.130514	0.147684	0.147739	0.127876	0.17704	0.171114	0.157531	0.193026	0.124527	0.126161	0.145455	0.141458
2594.26	0.130746	0.14793	0.147899	0.128112	0.177514	0.171476	0.157788	0.193233	0.124796	0.126509	0.145715	0.141772
2596.19	0.131153	0.14833	0.148156	0.128466	0.177937	0.171784	0.158016	0.193708	0.125203	0.126925	0.146104	0.142304
2598.12	0.131552	0.148766	0.148638	0.128832	0.1783	0.172019	0.15835	0.194114	0.125635	0.127352	0.146567	0.142733
2600.04	0.132097	0.149104	0.149007	0.129301	0.178615	0.17236	0.158875	0.194553	0.12598	0.127636	0.146946	0.142998
2601.97	0.132664	0.149596	0.149503	0.129724	0.179097	0.172935	0.159487	0.195115	0.126199	0.12784	0.14724	0.143387
2603.9	0.133078	0.150233	0.150109	0.130186	0.179523	0.173466	0.15995	0.195583	0.126579	0.128261	0.147707	0.143914
2605.83	0.133555	0.150802	0.150571	0.130686	0.179899	0.17378	0.160324	0.19605	0.126945	0.128718	0.148212	0.144359
2607.76	0.133896	0.151308	0.151079	0.131163	0.180409	0.174187	0.160822	0.196417	0.127248	0.128977	0.148536	0.144689
2609.69	0.13416	0.151624	0.151576	0.131621	0.180929	0.174666	0.16116	0.196812	0.127497	0.129359	0.148876	0.144839
2611.62	0.134587	0.151951	0.151938	0.131964	0.181274	0.175045	0.161462	0.197321	0.127933	0.129595	0.149148	0.145092
2613.55	0.135032	0.152363	0.152246	0.132338	0.181643	0.175536	0.161799	0.197685	0.128332	0.129846	0.149377	0.145581
2615.47	0.13548	0.152655	0.152534	0.132714	0.181979	0.175916	0.162169	0.198073	0.128565	0.130273	0.149732	0.145863
2617.4	0.135999	0.153103	0.153066	0.133114	0.182333	0.176212	0.16271	0.198507	0.128948	0.130587	0.150149	0.146323
2619.33	0.136536	0.153599	0.153752	0.133687	0.182892	0.176744	0.163251	0.199002	0.129375	0.13111	0.150574	0.146737
2621.26	0.137102	0.154246	0.154386	0.134287	0.18349	0.177345	0.163763	0.199586	0.129799	0.131499	0.151134	0.1471
2623.19	0.137721	0.154889	0.15491	0.134737	0.1841	0.177871	0.164331	0.200108	0.130136	0.13184	0.151644	0.147725
2625.12	0.138126	0.155329	0.155266	0.135163	0.184622	0.178297	0.164891	0.200647	0.130659	0.132356	0.152197	0.148189
2627.05	0.138423	0.155881	0.155788	0.13559	0.185047	0.178733	0.165202	0.201052	0.131222	0.13289	0.152714	0.148545
2628.98	0.139	0.15628	0.156192	0.136087	0.185432	0.179244	0.165636	0.201527	0.131723	0.133401	0.153032	0.148982
2630.91	0.139422	0.156657	0.156463	0.136565	0.185837	0.179721	0.1663	0.202025	0.132163	0.133798	0.153254	0.149475
2632.83	0.139779	0.157139	0.15689	0.136858	0.186349	0.180025	0.166795	0.202419	0.132379	0.134149	0.153579	0.149848
2634.76	0.140492	0.157737	0.157429	0.137432	0.186871	0.180339	0.167148	0.20308	0.132793	0.134589	0.154134	0.15021
2636.69	0.14103	0.158467	0.158197	0.13798	0.187386	0.180933	0.167651	0.20388	0.13326	0.135048	0.15469	0.150613
2638.62	0.141627	0.158994	0.158832	0.138502	0.187933	0.181626	0.168154	0.204409	0.133797	0.135679	0.15526	0.151179
2640.55	0.14239	0.159483	0.159336	0.139194	0.188535	0.182201	0.168593	0.204801	0.134477	0.136353	0.155885	0.151784
2642.48	0.14285	0.160083	0.159837	0.139767	0.189119	0.182754	0.169128	0.205393	0.135207	0.136732	0.156426	0.152302
2644.41	0.143348	0.160602	0.160326	0.140187	0.189648	0.183238	0.169735	0.206015	0.135753	0.137153	0.156828	0.152793
2646.34	0.143906	0.161169	0.160768	0.140534	0.190158	0.183643	0.170058	0.206441	0.136019	0.137571	0.157374	0.153218
2648.26	0.144355	0.161733	0.161197	0.140935	0.190701	0.183991	0.170379	0.206836	0.136317	0.137899	0.157828	0.153644
2650.19	0.14473	0.162149	0.161833	0.141416	0.191194	0.184325	0.17086	0.20737	0.136914	0.138353	0.158186	0.154054
2652.12	0.145194	0.162721	0.162468	0.141876	0.191631	0.18488	0.171359	0.208132	0.137542	0.138808	0.158636	0.154522
2654.05	0.145812	0.163375	0.163012	0.14236	0.192232	0.185519	0.171924	0.208797	0.138	0.139057	0.159073	0.154881
2655.98	0.146454	0.163875	0.16362	0.143074	0.192686	0.186029	0.172351	0.209299	0.138321	0.13943	0.15952	0.155313
2657.91	0.14709	0.164489	0.16426	0.143718	0.193232	0.186519	0.172873	0.209811	0.138667	0.140048	0.16002	0.155935
2659.84	0.147606	0.165079	0.164777	0.144393	0.193901	0.187149	0.173524	0.21043	0.139278	0.140622	0.16055	0.156379
2661.77	0.148164	0.165607	0.165324	0.145033	0.19455	0.187723	0.174081	0.210964	0.139698	0.141044	0.161041	0.156873
2663.69	0.14874	0.166161	0.165962	0.145421	0.195225	0.188163	0.17463	0.211396	0.139955	0.141512	0.161444	0.157264
2665.62	0.149192	0.166653	0.166595	0.145645	0.19559	0.188604	0.175074	0.211893	0.1404	0.141888	0.161641	0.157658
2667.55	0.149631	0.167208	0.166996	0.145988	0.19594	0.189111	0.175423	0.212273	0.140912	0.142368	0.162155	0.158144
2669.48	0.15013	0.167697	0.167295	0.146677	0.196441	0.189573	0.175893	0.2128	0.141356	0.142952	0.162745	0.158473
2671.41	0.150521	0.168139	0.167851	0.147277	0.196951	0.190045	0.176463	0.213377	0.141716	0.143258	0.16307	0.158951
2673.34	0.150997	0.168659	0.168529	0.147828	0.197468	0.190515	0.177135	0.213973	0.1421	0.143458	0.16359	0.159548
2675.27	0.151789	0.169246	0.169094	0.148552	0.198054	0.190956	0.17789	0.214611	0.142584	0.14391	0.164096	0.160081
2677.2	0.152606	0.169875	0.169684	0.149136	0.19854	0.19151	0.178412	0.215147	0.143191	0.144477	0.16454	0.160531
2679.13	0.153196	0.170383	0.170431	0.149691	0.199119	0.192123	0.178864	0.215766	0.143864	0.144948	0.16509	0.160858
2681.05	0.153525	0.170865	0.17095	0.150047	0.199744	0.192618	0.179434	0.216513	0.144368	0.14541	0.165607	0.161379
2682.98	0.154039	0.171407	0.171222	0.150458	0.200197	0.193267	0.179915	0.217094	0.144865	0.14612	0.166183	0.161998
2684.91	0.154447	0.172113	0.171454	0.150953	0.200692	0.193829	0.180317	0.217413	0.145362	0.146808	0.166746	0.162473
2686.84	0.154765	0.172781	0.171911	0.151263	0.201227	0.194102	0.180666	0.217944	0.145746	0.147276	0.16722	0.16294
2688.77	0.155364	0.173109	0.172533	0.151862	0.201735	0.194523	0.181008	0.21858	0.146299	0.147628	0.167625	0.163345
2690.7	0.15607	0.173617	0.173072	0.152325	0.202308	0.195092	0.181502	0.219287	0.146758	0.147848	0.168122	0.16381
2692.63	0.156641	0.17417	0.17371	0.152676	0.202837	0.195669	0.182171	0.219938	0.147203	0.148183	0.168547	0.164283
2694.56	0.157273	0.174738	0.174436	0.153387	0.20347	0.196179	0.182905	0.220555	0.14766	0.148878	0.169007	0.164867
2696.48	0.157883	0.175615	0.175159	0.154046	0.204088	0.196874	0.183465	0.221315	0.148067	0.149572	0.169636	0.165445
2698.41	0.158322	0.176283	0.175711	0.154595	0.204599	0.197563	0.183947	0.22187	0.148713	0.150058	0.1702	0.165957
2700.34	0.158903	0.176715	0.176292	0.155056	0.205404	0.197962	0.184595	0.222382	0.149408	0.150533	0.170733	0.166526
2702.27	0.159427	0.177381	0.176916	0.15561	0.206055	0.198527	0.185174	0.222985	0.149978	0.150972	0.171217	0.167156
2704.2	0.160021	0.177972	0.177419	0.156347	0.206347	0.199292	0.185609	0.223551	0.150351	0.15143	0.171859	0.167764
2706.13	0.160715	0.178473	0.178042	0.156911	0.206842	0.199754	0.186186	0.224089	0.150802	0.151995	0.172446	0.16823
2708.06	0.161372	0.179036	0.178709	0.157561	0.207483	0.20022	0.186992	0.224667	0.151333	0.152518	0.172796	0.168839
2709.99	0.162266	0.179791	0.17939	0.158269	0.207974	0.200951	0.187736	0.225388	0.151899	0.153003	0.173312	0.169534
2711.92	0.163192	0.180674	0.180189	0.159002	0.208683	0.201673	0.188401	0.226069	0.152617	0.153722	0.174255	0.170123
2713.84	0.163969	0.181434	0.181045	0.159954	0.209593	0.2025	0.189076	0.226958	0.153313	0.154482	0.175066	0.170788
2715.77	0.164692	0.182395	0.181806	0.160769	0.210415	0.203179	0.189904	0.227934	0.153803	0.155303	0.17579	0.17148
2717.7	0.165473	0.183344	0.182636	0.161447	0.211105	0.203701	0.19062	0.228553	0.154532	0.155917	0.17651	0.17221
2719.63	0.166252	0.183889	0.183404	0.162245	0.211714	0.204426	0.191053	0.22911	0.155292	0.15644	0.176946	0.172886
2721.56	0.166839	0.184328	0.184119	0.162656	0.212395	0.205099	0.19152	0.229667	0.155849	0.157147	0.177537	0.173292
2723.49	0.167326	0.185039	0.184766	0.163397	0.212975	0.205702	0.191967	0.230374	0.156364	0.157448	0.178182	0.173764
2725.42	0.167819	0.185748	0.185246	0.164171	0.213436	0.206235	0.192486	0.231022	0.157001	0.157779	0.178709	0.174328
2727.35	0.168344	0.186192	0.185763	0.164578	0.214075	0.206663	0.193117	0.231475	0.157864	0.158515	0.179266	0.174894
2729.27	0.169018	0.186833	0.186267	0.165154	0.214881	0.207245	0.193706	0.232123	0.15848	0.159298	0.17997	0.175628
2731.2	0.16973	0.187734	0.186903	0.165568	0.215569	0.208033	0.194247	0.232837	0.158997	0.160058	0.180654	0.176378
2733.13	0.170323	0.188414	0.187616	0.166286	0.215999	0.208711	0.1947	0.233607	0.159571	0.160507	0.181176	0.176899
2735.06	0.171064	0.188891	0.188304	0.166996	0.216487	0.209247	0.195109	0.234214	0.160118	0.161091	0.181702	0.177185
2736.99	0.171707	0.189366	0.188906	0.167343	0.217127	0.209739	0.195769	0.234682	0.160707	0.161673	0.182279	0.177484
2738.92	0.172157	0.189853	0.189547	0.167595	0.217753	0.210149	0.196352	0.235175	0.161324	0.162001	0.182791	0.178023
2740.85	0.172539	0.19031	0.189991	0.167905	0.218232	0.210491	0.196584	0.235606	0.16179	0.162454	0.183226	0.178577
2742.78	0.172846	0.190793	0.190283	0.168498	0.218699	0.210923	0.197035	0.23606	0.162044	0.162778	0.183507	0.179019
2744.71	0.173504	0.19144	0.190787	0.169193	0.219133	0.21128	0.197576	0.236449	0.162346	0.162946	0.183782	0.179473
2746.63	0.17429	0.192056	0.191379	0.169673	0.219391	0.211557	0.197876	0.236973	0.162787	0.16327	0.184221	0.179894
2748.56	0.174737	0.192593	0.192067	0.170302	0.220002	0.212134	0.198339	0.237647	0.163136	0.163672	0.184684	0.180312
2750.49	0.175187	0.19325	0.192699	0.17096	0.220691	0.212802	0.198961	0.238179	0.16353	0.1641	0.185104	0.180777
2752.42	0.175799	0.193955	0.193222	0.171414	0.221243	0.213447	0.199617	0.238554	0.164336	0.164951	0.185718	0.181359
2754.35	0.176476	0.194465	0.193708	0.171965	0.221925	0.214173	0.200294	0.239146	0.164842	0.165546	0.186424	0.182059
2756.28	0.177232	0.195039	0.194254	0.172679	0.222585	0.214679	0.2009	0.239806	0.165025	0.165825	0.186769	0.182614
2758.21	0.177866	0.195697	0.194854	0.173305	0.223129	0.215008	0.201213	0.240245	0.165499	0.166422	0.187252	0.183021
2760.14	0.178482	0.196004	0.195452	0.173875	0.223633	0.215528	0.20141	0.240715	0.166207	0.167097	0.187897	0.183594
2762.06	0.179056	0.196614	0.195939	0.174378	0.224173	0.21606	0.201832	0.241352	0.166898	0.167514	0.188277	0.184033
2763.99	0.179607	0.197442	0.196634	0.174865	0.224796	0.216588	0.202571	0.242061	0.167423	0.167974	0.188854	0.184467
2765.92	0.180337	0.198052	0.197543	0.175679	0.225487	0.217341	0.203195	0.242681	0.168151	0.168744	0.189506	0.184865
2767.85	0.181061	0.198736	0.198356	0.176439	0.226072	0.218196	0.203811	0.243464	0.168826	0.16948	0.190058	0.185505
2769.78	0.181907	0.199643	0.199129	0.177166	0.226831	0.219012	0.204674	0.244387	0.169468	0.170242	0.190848	0.186444
2771.71	0.182681	0.200674	0.199834	0.178028	0.227697	0.219811	0.205409	0.245154	0.170193	0.17082	0.191616	0.187066
2773.64	0.183368	0.201537	0.200448	0.178749	0.228379	0.220398	0.206052	0.245902	0.170953	0.17139	0.192072	0.187732
2775.57	0.183993	0.202128	0.201045	0.179203	0.22903	0.220906	0.206673	0.246441	0.171793	0.172209	0.192705	0.188474
2777.5	0.184708	0.202656	0.201746	0.179737	0.22993	0.221741	0.207324	0.247011	0.17258	0.173103	0.193582	0.189188
2779.42	0.185548	0.203369	0.202434	0.180546	0.230822	0.222555	0.208047	0.247815	0.173386	0.173931	0.194432	0.189928
2781.35	0.186302	0.2042	0.203433	0.181367	0.231458	0.223215	0.208744	0.248647	0.174116	0.174639	0.195257	0.190779
2783.28	0.187164	0.205202	0.20448	0.182232	0.232215	0.224075	0.209502	0.24946	0.174871	0.175312	0.196048	0.191463
2785.21	0.188178	0.20636	0.2055	0.183192	0.233229	0.224979	0.210417	0.250532	0.175822	0.176047	0.196898	0.192196
2787.14	0.189286	0.207579	0.206593	0.184346	0.234241	0.225991	0.211407	0.251589	0.176721	0.176993	0.197701	0.193128
2789.07	0.190399	0.208556	0.20769	0.185564	0.235223	0.227053	0.212396	0.252491	0.177658	0.178008	0.198658	0.194135
2791	0.191478	0.209651	0.208785	0.186693	0.236364	0.228063	0.213396	0.253538	0.17879	0.179116	0.19986	0.195408
2792.93	0.192702	0.21094	0.209758	0.187636	0.237449	0.229178	0.21459	0.254685	0.179913	0.180421	0.20092	0.196542
2794.85	0.193936	0.211955	0.210934	0.188779	0.23852	0.230405	0.215763	0.255708	0.180935	0.181558	0.201969	0.197425
2796.78	0.195041	0.212981	0.212198	0.190007	0.239733	0.231516	0.216919	0.25669	0.181972	0.18248	0.203227	0.198486
2798.71	0.196342	0.214179	0.213304	0.191072	0.241059	0.232545	0.218086	0.258113	0.183172	0.183533	0.204509	0.199485
2800.64	0.197709	0.215699	0.214561	0.192421	0.242372	0.23379	0.219272	0.259595	0.184464	0.184893	0.205568	0.200766
2802.57	0.199131	0.217302	0.216411	0.193871	0.243843	0.235264	0.220687	0.260936	0.185803	0.186497	0.2067	0.202481
2804.5	0.200761	0.218986	0.218187	0.195509	0.245522	0.236931	0.222337	0.262465	0.187425	0.188069	0.208302	0.204088
2806.43	0.202708	0.220831	0.219801	0.197483	0.247146	0.238661	0.224046	0.264336	0.189155	0.189448	0.210068	0.205493
2808.36	0.204652	0.222681	0.221636	0.199304	0.24882	0.240484	0.225784	0.266328	0.190776	0.190978	0.211771	0.207016
2810.28	0.206457	0.224513	0.223666	0.200932	0.250705	0.242304	0.227798	0.268227	0.192715	0.192887	0.213613	0.208982
2812.21	0.208444	0.226427	0.225517	0.202825	0.252652	0.244152	0.229824	0.270215	0.194951	0.194937	0.215671	0.210991
2814.14	0.210527	0.228496	0.227451	0.204858	0.254648	0.246069	0.231684	0.272141	0.196957	0.197081	0.21762	0.212848
2816.07	0.212619	0.230576	0.229573	0.207121	0.256683	0.24817	0.233611	0.274202	0.198945	0.19911	0.219758	0.214797
2818	0.214807	0.233006	0.231746	0.209342	0.258834	0.250546	0.235806	0.276375	0.201093	0.201287	0.222117	0.217083
2819.93	0.21718	0.235612	0.234126	0.211586	0.261225	0.252919	0.238254	0.27857	0.203534	0.203873	0.224153	0.219442
2821.86	0.219775	0.238092	0.236829	0.214181	0.263666	0.255324	0.240663	0.281343	0.206317	0.206687	0.226527	0.222008
2823.79	0.222651	0.240702	0.239817	0.216898	0.266333	0.258098	0.243338	0.284198	0.208958	0.209507	0.229563	0.224827
2825.72	0.22568	0.243879	0.242702	0.219708	0.269327	0.261206	0.246437	0.286876	0.212015	0.212492	0.232594	0.227715
2827.64	0.228948	0.247384	0.245958	0.222875	0.272687	0.264157	0.249615	0.290055	0.215456	0.215829	0.235779	0.23089
2829.57	0.232649	0.250926	0.2495	0.226558	0.276278	0.267627	0.253099	0.293708	0.218991	0.219221	0.239351	0.234289
2831.5	0.236757	0.254755	0.253194	0.230377	0.279892	0.271463	0.256997	0.297858	0.223016	0.223173	0.243398	0.23799
2833.43	0.2411	0.259102	0.257618	0.234776	0.284073	0.275453	0.261085	0.301974	0.227543	0.227864	0.247717	0.242253
2835.36	0.245992	0.264193	0.262882	0.240016	0.289066	0.28053	0.265802	0.306518	0.232721	0.233037	0.252596	0.247298
2837.29	0.252236	0.270381	0.26892	0.246188	0.294966	0.286507	0.271697	0.312666	0.23913	0.239412	0.258837	0.253521
2839.22	0.260017	0.278126	0.276315	0.253739	0.302117	0.293649	0.279116	0.319828	0.247133	0.247544	0.266603	0.261204
2841.15	0.269506	0.287682	0.285618	0.263086	0.31101	0.30286	0.288128	0.328614	0.257031	0.257798	0.276419	0.270773
2843.07	0.281142	0.299403	0.297179	0.274919	0.322569	0.314222	0.299245	0.339684	0.269551	0.270234	0.288483	0.282548
2845	0.295424	0.313604	0.310906	0.288991	0.336446	0.327679	0.312699	0.3531	0.284559	0.284939	0.302738	0.296663
2846.93	0.311246	0.329259	0.32602	0.304144	0.351187	0.342423	0.327208	0.367704	0.300892	0.301401	0.318695	0.31247
2848.86	0.325413	0.343774	0.340197	0.318113	0.364248	0.355348	0.339799	0.38044	0.31584	0.316456	0.333341	0.32706
2850.79	0.335785	0.3542	0.350442	0.328604	0.37221	0.363331	0.347343	0.388615	0.325888	0.326812	0.34353	0.337082
2852.72	0.340906	0.359621	0.355355	0.334085	0.374327	0.365543	0.349657	0.391421	0.3299	0.331227	0.34782	0.341224
2854.65	0.340677	0.360052	0.355106	0.333976	0.371843	0.363303	0.347704	0.389395	0.328637	0.330057	0.346381	0.339885
2856.58	0.336873	0.35591	0.351207	0.330203	0.366582	0.358471	0.342793	0.384597	0.323396	0.324914	0.341223	0.334842
2858.51	0.331391	0.350154	0.345778	0.324725	0.360911	0.352838	0.337153	0.379566	0.31672	0.318072	0.334822	0.328645
2860.43	0.325843	0.345088	0.340667	0.319361	0.356213	0.347853	0.332167	0.37479	0.310879	0.312122	0.328882	0.322923
2862.36	0.322091	0.341219	0.337032	0.315526	0.353017	0.344602	0.329141	0.371343	0.306529	0.307775	0.324655	0.318487
2864.29	0.320573	0.339229	0.335234	0.313555	0.351713	0.34295	0.327958	0.37005	0.304195	0.305294	0.322503	0.31622
2866.22	0.320537	0.33949	0.335193	0.313523	0.352043	0.342896	0.328094	0.370018	0.304299	0.305215	0.322389	0.316055
2868.15	0.321983	0.34108	0.336658	0.315147	0.353366	0.344307	0.32953	0.371235	0.305594	0.306438	0.323369	0.317082
2870.08	0.323835	0.342737	0.338684	0.316945	0.354807	0.345822	0.331031	0.373149	0.30674	0.307711	0.324566	0.31809
2872.01	0.325306	0.343886	0.339863	0.31787	0.355622	0.346674	0.331907	0.373942	0.30731	0.308162	0.325171	0.318476
2873.94	0.325639	0.34395	0.3398	0.317817	0.355961	0.346985	0.331714	0.373752	0.306812	0.307913	0.32482	0.318214
2875.86	0.324981	0.343256	0.339186	0.317118	0.35587	0.346779	0.331402	0.373805	0.306192	0.307234	0.324075	0.317328
2877.79	0.32484	0.343256	0.338956	0.316904	0.356024	0.346896	0.331946	0.37416	0.305951	0.306638	0.323577	0.316922
2879.72	0.325563	0.344237	0.339729	0.31773	0.357305	0.348097	0.333083	0.375114	0.306539	0.307289	0.323993	0.317739
2881.65	0.327477	0.346109	0.341648	0.319579	0.359573	0.350144	0.334969	0.377175	0.308432	0.308877	0.325683	0.319271
2883.58	0.330533	0.348695	0.344604	0.322485	0.362571	0.35317	0.33776	0.380087	0.311001	0.311425	0.328849	0.321649
2885.51	0.334203	0.352382	0.348512	0.326133	0.366346	0.356828	0.341343	0.384044	0.314694	0.315283	0.332524	0.325222
2887.44	0.338231	0.357186	0.352602	0.330266	0.370502	0.360891	0.345722	0.388461	0.319073	0.319694	0.336487	0.329552
2889.37	0.342853	0.362085	0.35688	0.334867	0.375008	0.365655	0.350436	0.39298	0.323508	0.324643	0.341054	0.334281
2891.3	0.347956	0.366823	0.361664	0.339734	0.379961	0.370618	0.355226	0.398166	0.328732	0.329921	0.346266	0.339352
2893.22	0.353358	0.371839	0.366969	0.34509	0.385137	0.375635	0.360056	0.403154	0.334129	0.335365	0.351537	0.344287
2895.15	0.358573	0.377453	0.372559	0.350799	0.390521	0.38114	0.365065	0.40801	0.339629	0.340746	0.356785	0.349309
2897.08	0.364195	0.383305	0.37805	0.356477	0.395781	0.386483	0.370303	0.413411	0.34531	0.346119	0.362552	0.354973
2899.01	0.370011	0.38889	0.383701	0.361693	0.400949	0.391733	0.375442	0.419002	0.351091	0.351807	0.36812	0.360587
2900.94	0.375548	0.394534	0.389175	0.366996	0.406145	0.397054	0.380854	0.424319	0.357095	0.357754	0.373485	0.366141
2902.87	0.381659	0.400404	0.394802	0.37301	0.411677	0.402528	0.386404	0.42943	0.363185	0.363742	0.379528	0.3721
2904.8	0.387896	0.406999	0.400971	0.379387	0.417546	0.408146	0.392079	0.43502	0.369618	0.370045	0.386185	0.37849
2906.73	0.39515	0.413973	0.407992	0.386618	0.424004	0.414641	0.398468	0.441438	0.377172	0.377806	0.393467	0.385785
2908.65	0.403951	0.421761	0.415978	0.394896	0.431461	0.42242	0.406257	0.448759	0.386204	0.386637	0.401736	0.394478
2910.58	0.41407	0.431883	0.425619	0.404799	0.440442	0.431532	0.415669	0.457414	0.396504	0.397026	0.411618	0.404688
2912.51	0.426046	0.443868	0.437281	0.416727	0.45172	0.442349	0.426376	0.46819	0.408939	0.40989	0.423422	0.416767
2914.44	0.438866	0.457085	0.450037	0.429569	0.463706	0.453981	0.437859	0.479873	0.422994	0.424213	0.437268	0.430405
2916.37	0.450954	0.469553	0.462149	0.44204	0.474178	0.464435	0.448131	0.48982	0.436408	0.437232	0.450462	0.443023
2918.3	0.460896	0.479526	0.472211	0.452411	0.481548	0.471552	0.455194	0.497347	0.446209	0.446778	0.460358	0.452979
2920.23	0.467873	0.486795	0.478933	0.460079	0.48495	0.475145	0.458681	0.501637	0.452424	0.45353	0.466917	0.460088
2922.16	0.471959	0.491225	0.48211	0.463996	0.484803	0.475764	0.459226	0.502323	0.455539	0.457284	0.469979	0.463352
2924.09	0.471983	0.491662	0.482282	0.46397	0.482046	0.473397	0.456824	0.499675	0.454756	0.456409	0.469153	0.462769
2926.01	0.468094	0.487703	0.479091	0.460718	0.47634	0.467889	0.451157	0.494034	0.450169	0.451296	0.464274	0.458151
2927.94	0.461182	0.480747	0.473003	0.454273	0.468655	0.459734	0.443345	0.486384	0.442634	0.443259	0.456181	0.450261
2929.87	0.452169	0.471765	0.464175	0.445572	0.459402	0.450117	0.433891	0.477123	0.432785	0.433212	0.446265	0.440308
2931.8	0.441912	0.46174	0.453399	0.434459	0.448649	0.439688	0.423477	0.46688	0.421162	0.421711	0.434974	0.429036
2933.73	0.430466	0.450049	0.441811	0.42199	0.438002	0.428258	0.412283	0.455633	0.408839	0.409129	0.422403	0.416687
2935.66	0.418098	0.437111	0.429806	0.409568	0.426985	0.416855	0.400817	0.444026	0.39577	0.396099	0.409592	0.403535
2937.59	0.405489	0.424583	0.417506	0.39765	0.415879	0.405788	0.390199	0.433144	0.382905	0.382696	0.397194	0.391036
2939.52	0.393985	0.412656	0.406262	0.386256	0.405868	0.395447	0.380517	0.423214	0.370841	0.37055	0.385677	0.379621
2941.44	0.383479	0.401831	0.396277	0.375699	0.396759	0.386555	0.371693	0.414149	0.360273	0.359885	0.375182	0.36942
2943.37	0.374167	0.393322	0.387711	0.366938	0.389136	0.379243	0.363769	0.406076	0.351564	0.350994	0.36627	0.360937
2945.3	0.36707	0.386611	0.380682	0.359839	0.383217	0.373215	0.357532	0.399823	0.344468	0.344414	0.359603	0.354132
2947.23	0.362032	0.381435	0.375429	0.354619	0.378725	0.368272	0.35282	0.395423	0.339734	0.339499	0.354847	0.349232
2949.16	0.358957	0.377975	0.372257	0.35123	0.375554	0.364751	0.349265	0.392336	0.337288	0.336467	0.351671	0.346482
2951.09	0.357553	0.376305	0.370621	0.349377	0.373544	0.362684	0.34734	0.390591	0.336276	0.334916	0.350267	0.345094
2953.02	0.35666	0.375803	0.370053	0.348479	0.372035	0.361645	0.346143	0.389368	0.335711	0.334089	0.350076	0.344596
2954.95	0.355517	0.374783	0.369558	0.347661	0.370488	0.360474	0.345071	0.387799	0.335072	0.333405	0.349608	0.344424
2956.87	0.353982	0.373038	0.367901	0.345831	0.368369	0.358393	0.343221	0.385764	0.333514	0.332032	0.347804	0.343046
2958.8	0.35128	0.370257	0.364918	0.342626	0.36565	0.355473	0.339871	0.382982	0.330662	0.329055	0.345123	0.340227
2960.73	0.346963	0.36622	0.360894	0.338777	0.362394	0.351965	0.335981	0.379423	0.326906	0.325005	0.341388	0.336466
2962.66	0.341394	0.360848	0.355874	0.33368	0.357777	0.347342	0.331403	0.375	0.321599	0.319601	0.336353	0.331412
2964.59	0.334675	0.353902	0.349237	0.326884	0.352202	0.341308	0.325784	0.369439	0.314557	0.312546	0.329826	0.324821
2966.52	0.326579	0.345636	0.341445	0.31873	0.345783	0.334706	0.319545	0.362714	0.306784	0.304592	0.321778	0.31707
2968.45	0.317656	0.336792	0.333045	0.309725	0.338804	0.327913	0.312859	0.355892	0.298019	0.295863	0.313154	0.308757
2970.38	0.309008	0.327797	0.324215	0.300667	0.33167	0.320911	0.305752	0.349291	0.288884	0.286901	0.304336	0.30022
2972.31	0.30054	0.319336	0.315391	0.292259	0.324992	0.314087	0.299046	0.342526	0.280278	0.277915	0.295768	0.29176
2974.23	0.292338	0.311268	0.307238	0.28437	0.318977	0.307504	0.292803	0.335998	0.272	0.269529	0.288239	0.283743
2976.16	0.284938	0.303855	0.300201	0.277186	0.31346	0.301647	0.287146	0.33033	0.264613	0.26238	0.281467	0.276885
2978.09	0.278506	0.297368	0.293884	0.270778	0.308574	0.296868	0.282183	0.325426	0.258253	0.255688	0.275246	0.271062
2980.02	0.272557	0.291421	0.288309	0.265078	0.304145	0.292488	0.277832	0.320945	0.252493	0.249876	0.269831	0.265843
2981.95	0.267047	0.28607	0.283398	0.259603	0.300332	0.288605	0.273825	0.317057	0.247513	0.244852	0.264939	0.26129
2983.88	0.262138	0.28146	0.278903	0.254422	0.296927	0.285066	0.269934	0.313293	0.243265	0.240388	0.260599	0.25708
2985.81	0.258127	0.277498	0.274933	0.250367	0.293557	0.28185	0.26688	0.309858	0.23928	0.236693	0.256717	0.253115
2987.74	0.25486	0.27386	0.271309	0.247113	0.290743	0.279337	0.264189	0.307079	0.235777	0.232999	0.253546	0.249789
2989.66	0.251783	0.270955	0.268615	0.244455	0.288438	0.276939	0.261838	0.304863	0.232595	0.229835	0.250937	0.247078
2991.59	0.24965	0.268704	0.266681	0.242286	0.286814	0.275176	0.260319	0.30318	0.230392	0.227526	0.24884	0.245038
2993.52	0.248225	0.267256	0.264977	0.240819	0.286017	0.274217	0.259161	0.30229	0.22942	0.226093	0.247557	0.243654
2995.45	0.247276	0.266249	0.264213	0.240077	0.285371	0.273438	0.25825	0.301661	0.228497	0.225497	0.246797	0.242723
2997.38	0.247381	0.265895	0.264212	0.239981	0.28507	0.273376	0.257973	0.30142	0.228106	0.225457	0.246827	0.242857
2999.31	0.248144	0.266605	0.265039	0.240361	0.28531	0.274087	0.258665	0.302243	0.228843	0.226284	0.247603	0.243948
3001.24	0.249736	0.26822	0.266489	0.241777	0.286449	0.275084	0.260006	0.303715	0.230807	0.227873	0.249338	0.245614
3003.17	0.251876	0.270499	0.268632	0.244109	0.288536	0.276533	0.261599	0.305331	0.233652	0.230276	0.251725	0.247827
3005.1	0.254131	0.272841	0.27126	0.246107	0.29051	0.278501	0.263661	0.307213	0.236477	0.232916	0.25409	0.250199
3007.02	0.256883	0.275643	0.273863	0.248727	0.292494	0.280522	0.265914	0.309476	0.239085	0.235474	0.256709	0.252709
3008.95	0.259236	0.278509	0.276266	0.251333	0.294455	0.282436	0.2677	0.311408	0.241393	0.237728	0.258959	0.254892
3010.88	0.26063	0.279825	0.277747	0.252859	0.295463	0.283689	0.268493	0.312251	0.242713	0.238784	0.260055	0.255819
3012.81	0.260848	0.279438	0.277899	0.253115	0.29525	0.283359	0.26814	0.312076	0.242198	0.238515	0.259604	0.255558
3014.74	0.259925	0.278273	0.276754	0.251925	0.29438	0.282389	0.26728	0.3111	0.240603	0.237067	0.258269	0.254544
3016.67	0.257768	0.276487	0.27489	0.250064	0.293307	0.280958	0.266149	0.309577	0.238713	0.235159	0.25653	0.25274
3018.6	0.255911	0.274823	0.273149	0.248189	0.292112	0.279486	0.264908	0.30855	0.236639	0.233176	0.254723	0.250625
3020.53	0.254777	0.273317	0.271607	0.24644	0.291091	0.278758	0.263931	0.307973	0.235062	0.231254	0.252958	0.248943
3022.45	0.253505	0.272208	0.270473	0.244941	0.290682	0.278424	0.263158	0.307241	0.234046	0.229912	0.251443	0.247774
3024.38	0.253063	0.271705	0.269989	0.244383	0.290718	0.278467	0.263122	0.307045	0.233321	0.229295	0.250828	0.246932
3026.31	0.252899	0.271788	0.269871	0.244467	0.291187	0.278558	0.26361	0.307405	0.233063	0.229077	0.25089	0.246817
3028.24	0.253714	0.272664	0.270547	0.245245	0.292149	0.279308	0.264331	0.308233	0.233381	0.229366	0.251361	0.247213
3030.17	0.254995	0.27329	0.271673	0.246278	0.292963	0.280553	0.265427	0.309512	0.234042	0.229896	0.251683	0.247569
3032.1	0.25564	0.273774	0.272754	0.246981	0.293589	0.281358	0.26626	0.310423	0.234439	0.230131	0.251661	0.247915
3034.03	0.256479	0.274884	0.273466	0.247724	0.294636	0.282239	0.267066	0.311294	0.235178	0.230514	0.252357	0.248498
3035.96	0.257332	0.276311	0.274211	0.248507	0.295709	0.283403	0.26819	0.31277	0.236307	0.231363	0.253503	0.249486
3037.89	0.258802	0.277655	0.276001	0.249912	0.296998	0.284731	0.269665	0.314054	0.237097	0.232551	0.25441	0.250428
3039.81	0.260446	0.278959	0.277626	0.251545	0.29858	0.286088	0.271017	0.314896	0.238101	0.233625	0.255459	0.251262
3041.74	0.26191	0.280107	0.278766	0.252787	0.299709	0.287257	0.272131	0.316148	0.239659	0.234786	0.256496	0.252369
3043.67	0.263562	0.281163	0.279924	0.25364	0.301036	0.288113	0.273222	0.317469	0.24061	0.235877	0.257495	0.253659
3045.6	0.26517	0.2824	0.281373	0.255221	0.302705	0.289367	0.274559	0.318961	0.241664	0.237064	0.258893	0.254852
3047.53	0.266404	0.284061	0.282819	0.256645	0.304473	0.291113	0.276088	0.320483	0.243619	0.238542	0.260293	0.256095
3049.46	0.267736	0.285833	0.284309	0.257565	0.305836	0.292498	0.277666	0.321673	0.24509	0.239796	0.261227	0.257102
3051.39	0.269527	0.287664	0.286224	0.259658	0.306914	0.293803	0.279464	0.323163	0.24621	0.241106	0.262358	0.258181
3053.32	0.271414	0.28969	0.287891	0.261882	0.308785	0.295598	0.281296	0.325213	0.247397	0.242648	0.263879	0.259854
3055.24	0.27306	0.291228	0.289534	0.263399	0.310756	0.297497	0.282812	0.327031	0.248927	0.244332	0.265498	0.261318
3057.17	0.27433	0.292385	0.291226	0.264596	0.312371	0.29904	0.283946	0.328431	0.250849	0.245703	0.267158	0.262505
3059.1	0.276076	0.294071	0.29268	0.266039	0.31386	0.300504	0.285382	0.329805	0.252566	0.247122	0.268544	0.264053
3061.03	0.278087	0.295965	0.294015	0.26776	0.315292	0.302012	0.287008	0.33126	0.254104	0.24836	0.269825	0.265388
3062.96	0.279899	0.297359	0.295722	0.269445	0.316834	0.303335	0.288335	0.332952	0.255459	0.249656	0.270824	0.266608
3064.89	0.280994	0.298478	0.29724	0.270623	0.31805	0.304149	0.289556	0.334312	0.256397	0.250476	0.271539	0.267662
3066.82	0.28166	0.299092	0.297977	0.271454	0.31896	0.305043	0.29041	0.335238	0.256731	0.250954	0.272305	0.26807
3068.75	0.282805	0.300044	0.298738	0.272079	0.319863	0.306405	0.291449	0.33597	0.257429	0.251997	0.273075	0.268699
3070.68	0.283964	0.301569	0.299943	0.273179	0.321158	0.307551	0.292626	0.337394	0.258692	0.253143	0.274267	0.269851
3072.6	0.285252	0.302652	0.301364	0.274507	0.322572	0.30855	0.293634	0.338748	0.259977	0.254242	0.27525	0.2708
3074.53	0.286836	0.304033	0.3029	0.275878	0.324039	0.309946	0.295155	0.339799	0.26074	0.254835	0.276146	0.271901
3076.46	0.28844	0.30565	0.304355	0.277425	0.325591	0.311512	0.296991	0.341489	0.261576	0.255792	0.277001	0.272996
3078.39	0.289648	0.306572	0.305417	0.278714	0.32676	0.312573	0.298535	0.342689	0.262677	0.256863	0.277978	0.273757
3080.32	0.290394	0.307384	0.306137	0.279323	0.327689	0.313254	0.299211	0.343603	0.263258	0.25754	0.278841	0.274436
3082.25	0.291149	0.308186	0.306947	0.279682	0.328353	0.31443	0.29967	0.344508	0.264165	0.25818	0.279209	0.274948
3084.18	0.291931	0.309117	0.308012	0.280638	0.329391	0.315883	0.300671	0.345194	0.264983	0.25867	0.279771	0.275687
3086.11	0.292856	0.310606	0.309026	0.281674	0.330781	0.316882	0.3018	0.345987	0.265665	0.259366	0.280681	0.276297
3088.03	0.293759	0.311735	0.309943	0.282647	0.33177	0.317616	0.302948	0.34687	0.266635	0.260339	0.281634	0.276854
3089.96	0.294918	0.312677	0.311191	0.283833	0.333278	0.318749	0.30411	0.348167	0.267667	0.261393	0.282487	0.277789
3091.89	0.296276	0.313791	0.31222	0.284786	0.334791	0.320005	0.305114	0.349916	0.26876	0.2622	0.283429	0.278855
3093.82	0.297697	0.314956	0.313268	0.285963	0.336008	0.321401	0.306578	0.351444	0.269835	0.263352	0.284356	0.27968
3095.75	0.298935	0.315838	0.314487	0.287129	0.337279	0.322569	0.307732	0.352016	0.270794	0.264474	0.285216	0.280453
3097.68	0.300179	0.317038	0.315656	0.288108	0.338597	0.323897	0.308544	0.352937	0.271711	0.265289	0.286323	0.281475
3099.61	0.301482	0.318355	0.316748	0.289201	0.339957	0.325663	0.31008	0.354657	0.273089	0.266379	0.287521	0.282523
3101.54	0.301738	0.319201	0.317523	0.289678	0.341202	0.326563	0.311259	0.35553	0.274142	0.267438	0.2883	0.283221
3103.46	0.302649	0.320406	0.318786	0.290905	0.342327	0.327745	0.312137	0.356364	0.274928	0.268397	0.289166	0.284109
3105.39	0.304721	0.322405	0.320735	0.292788	0.343457	0.329363	0.31385	0.35783	0.276222	0.269404	0.289969	0.285383
3107.32	0.306457	0.324423	0.322317	0.294311	0.345037	0.330357	0.315555	0.359389	0.277233	0.270672	0.290862	0.286215
3109.25	0.308359	0.325649	0.323534	0.295782	0.346809	0.331837	0.317308	0.361233	0.27846	0.272306	0.292123	0.287161
3111.18	0.310338	0.327009	0.325196	0.297545	0.348568	0.33363	0.318963	0.363059	0.280033	0.273777	0.293654	0.288815
3113.11	0.312138	0.328777	0.327668	0.299664	0.350831	0.335679	0.320797	0.364691	0.281845	0.275028	0.295356	0.290591
3115.04	0.313886	0.33072	0.329345	0.301338	0.352789	0.33786	0.322691	0.366413	0.283504	0.276364	0.29693	0.292169
3116.97	0.315533	0.332664	0.330314	0.302638	0.354232	0.339438	0.32415	0.36818	0.284798	0.277694	0.298373	0.293244
3118.9	0.317152	0.33392	0.332241	0.303902	0.355649	0.341019	0.325697	0.369745	0.286295	0.279352	0.29997	0.294131
3120.82	0.318882	0.335155	0.334001	0.305492	0.357264	0.343031	0.327064	0.371553	0.288262	0.281015	0.301684	0.295823
3122.75	0.32033	0.337102	0.335381	0.306475	0.359076	0.344557	0.328392	0.373267	0.289875	0.282487	0.30308	0.297391
3124.68	0.32207	0.339399	0.337428	0.307733	0.361166	0.345517	0.330232	0.374574	0.291246	0.283997	0.304693	0.298857
3126.61	0.324274	0.341258	0.339415	0.310199	0.362985	0.347177	0.33233	0.376139	0.293104	0.28589	0.306164	0.300449
3128.54	0.326287	0.342763	0.341416	0.312687	0.364587	0.349453	0.334216	0.378171	0.295013	0.287845	0.307573	0.301753
3130.47	0.329042	0.345614	0.343978	0.31544	0.367698	0.351892	0.336627	0.380809	0.297641	0.289747	0.309807	0.30384
3132.4	0.331753	0.348353	0.346195	0.317586	0.370452	0.353704	0.339006	0.383035	0.299943	0.291796	0.311774	0.306122
3134.33	0.333892	0.350088	0.348352	0.319609	0.37192	0.355895	0.340675	0.38478	0.301493	0.293716	0.313374	0.307777
3136.25	0.336602	0.352765	0.351111	0.32204	0.373991	0.358674	0.3428	0.387084	0.303588	0.295777	0.315456	0.30942
3138.18	0.339002	0.355084	0.353401	0.324193	0.376498	0.361079	0.345005	0.389512	0.305774	0.297841	0.317707	0.311639
3140.11	0.340933	0.357294	0.355262	0.326202	0.378666	0.363096	0.346972	0.391491	0.307894	0.299685	0.319583	0.313729
3142.04	0.343231	0.359653	0.357669	0.328123	0.380812	0.36511	0.34904	0.3934	0.310113	0.301717	0.321344	0.315306
3143.97	0.345666	0.361736	0.359716	0.330316	0.382756	0.367355	0.350876	0.395557	0.3125	0.303917	0.323454	0.317189
3145.9	0.348293	0.364316	0.362197	0.332989	0.385119	0.369778	0.352906	0.398094	0.314817	0.306196	0.325652	0.319331
3147.83	0.351095	0.367267	0.365512	0.336094	0.387783	0.372234	0.355526	0.400528	0.317254	0.308235	0.327761	0.321562
3149.76	0.354109	0.370376	0.368488	0.339139	0.390337	0.374633	0.358581	0.402778	0.319988	0.310446	0.330127	0.32357
3151.69	0.356966	0.373056	0.371018	0.341379	0.392977	0.377181	0.361399	0.405354	0.322388	0.313085	0.332539	0.325606
3153.61	0.359244	0.375216	0.37327	0.34341	0.395759	0.379762	0.363889	0.408148	0.325094	0.316012	0.334697	0.328099
3155.54	0.361462	0.377645	0.37594	0.346253	0.398342	0.382377	0.366171	0.410614	0.327733	0.318769	0.337073	0.33042
3157.47	0.364258	0.380257	0.378827	0.348913	0.400429	0.384741	0.368568	0.412565	0.329917	0.321109	0.339643	0.332936
3159.4	0.367199	0.38317	0.381242	0.351422	0.402946	0.386793	0.37119	0.415005	0.332779	0.323498	0.341896	0.335179
3161.33	0.369991	0.38634	0.383913	0.353905	0.405863	0.389118	0.373695	0.41749	0.335605	0.325808	0.344178	0.337243
3163.26	0.372532	0.388786	0.386315	0.356246	0.408274	0.391802	0.375747	0.420034	0.337773	0.328052	0.346449	0.339788
3165.19	0.375395	0.391617	0.388367	0.359292	0.410822	0.394571	0.377873	0.422575	0.340182	0.33047	0.348997	0.342587
3167.12	0.378737	0.394682	0.391254	0.362462	0.41386	0.397307	0.380845	0.425003	0.34307	0.332961	0.351381	0.345145
3169.04	0.381979	0.397403	0.394991	0.365185	0.416737	0.399773	0.383764	0.427633	0.346041	0.335817	0.353557	0.347319
3170.97	0.385862	0.400641	0.398389	0.367755	0.4196	0.402903	0.386287	0.430372	0.34876	0.339035	0.356453	0.349551
3172.9	0.388939	0.404307	0.401282	0.370729	0.422812	0.405677	0.388929	0.432958	0.35158	0.341855	0.35968	0.352137
3174.83	0.391273	0.407074	0.404349	0.37387	0.425471	0.408353	0.391541	0.436244	0.354751	0.34486	0.362655	0.354763
3176.76	0.394235	0.409696	0.407718	0.376358	0.427859	0.411153	0.39431	0.439578	0.357676	0.347983	0.365071	0.357328
3178.69	0.397004	0.412401	0.410286	0.378664	0.430824	0.413142	0.396729	0.441791	0.360182	0.350231	0.367092	0.359624
3180.62	0.399714	0.41538	0.412582	0.381503	0.433625	0.416115	0.399285	0.444038	0.362498	0.352496	0.36971	0.361957
3182.55	0.402851	0.419141	0.415972	0.384788	0.436525	0.419244	0.402168	0.446365	0.364943	0.355149	0.372656	0.36465
3184.48	0.405723	0.42185	0.419119	0.387884	0.439278	0.422039	0.404967	0.448736	0.367869	0.357585	0.374838	0.366986
3186.4	0.408749	0.424254	0.421721	0.390585	0.441896	0.424865	0.407705	0.452162	0.370593	0.360004	0.377082	0.369073
3188.33	0.412574	0.427809	0.424826	0.393873	0.445049	0.427945	0.410877	0.455262	0.373801	0.362908	0.379841	0.371786
3190.26	0.415743	0.431021	0.427932	0.396859	0.448413	0.430768	0.413877	0.457957	0.377144	0.366006	0.382669	0.374662
3192.19	0.418478	0.433758	0.430759	0.400038	0.45105	0.433209	0.416112	0.461183	0.380095	0.368942	0.385347	0.377101
3194.12	0.421631	0.436957	0.434158	0.40337	0.453444	0.436263	0.418536	0.464113	0.383045	0.372027	0.388052	0.380092
3196.05	0.424991	0.440112	0.437349	0.406152	0.456469	0.439439	0.421118	0.467077	0.386279	0.374959	0.390901	0.38334
3197.98	0.427393	0.442094	0.439175	0.408398	0.459368	0.441967	0.423887	0.469522	0.389533	0.37745	0.393409	0.385617
3199.91	0.429799	0.445044	0.441951	0.410876	0.461797	0.444358	0.426932	0.471708	0.392025	0.380451	0.396039	0.387677
3201.83	0.433296	0.44891	0.445705	0.414024	0.464518	0.447375	0.429794	0.474309	0.394284	0.383243	0.398599	0.390242
3203.76	0.436962	0.451985	0.448314	0.41755	0.467401	0.450249	0.432744	0.477329	0.396822	0.385223	0.400874	0.392603
3205.69	0.440239	0.45525	0.4512	0.420943	0.470505	0.453156	0.435886	0.480135	0.399707	0.387974	0.403797	0.395048
3207.62	0.443827	0.458666	0.454899	0.423668	0.474024	0.456565	0.439026	0.483541	0.403148	0.391262	0.4073	0.398015
3209.55	0.44648	0.461	0.45806	0.4263	0.477072	0.459529	0.442191	0.486246	0.40638	0.393777	0.410088	0.401043
3211.48	0.448712	0.463563	0.461553	0.429172	0.480025	0.462688	0.445303	0.488715	0.409549	0.396883	0.412917	0.404302
3213.41	0.452522	0.467639	0.465146	0.43258	0.483631	0.4662	0.448208	0.492579	0.412569	0.400515	0.416289	0.407357
3215.34	0.455832	0.470746	0.467796	0.435028	0.486713	0.468948	0.450231	0.495665	0.41525	0.403434	0.418723	0.409765
3217.27	0.459623	0.474179	0.471421	0.438111	0.490326	0.472129	0.453404	0.498765	0.418743	0.406733	0.42117	0.412526
3219.19	0.462435	0.47747	0.474847	0.44152	0.493645	0.475174	0.456656	0.501585	0.421869	0.409743	0.423951	0.41471
3221.12	0.464809	0.48027	0.477056	0.44428	0.496096	0.477948	0.459051	0.504386	0.424531	0.412574	0.427093	0.417171
3223.05	0.468747	0.484168	0.480022	0.447721	0.499135	0.48188	0.462347	0.507757	0.427667	0.415928	0.430911	0.42036
3224.98	0.472834	0.488434	0.483816	0.451475	0.50242	0.485552	0.466087	0.511173	0.431239	0.419421	0.434252	0.423812
3226.91	0.477136	0.492444	0.48816	0.455535	0.506069	0.488844	0.469904	0.514784	0.434617	0.422812	0.437635	0.427611
3228.84	0.48175	0.496263	0.492183	0.45985	0.509831	0.492795	0.473705	0.518338	0.438215	0.426252	0.441658	0.430876
3230.77	0.486469	0.50052	0.495628	0.464306	0.513972	0.496963	0.477572	0.522503	0.442577	0.430077	0.445302	0.434041
3232.7	0.490594	0.504485	0.499372	0.468362	0.517625	0.500779	0.481509	0.526657	0.446272	0.43431	0.44856	0.437767
3234.62	0.49428	0.508087	0.504016	0.472139	0.521738	0.504388	0.485455	0.529698	0.450359	0.43895	0.452501	0.441463
3236.55	0.497213	0.512014	0.508232	0.475732	0.526033	0.508027	0.489473	0.53273	0.454725	0.442576	0.456723	0.445267
3238.48	0.500948	0.516476	0.512068	0.479023	0.530388	0.511669	0.493381	0.53701	0.459114	0.446387	0.460702	0.449196
3240.41	0.505594	0.520841	0.516145	0.483038	0.534666	0.515114	0.497082	0.541488	0.463841	0.450855	0.464498	0.453083
3242.34	0.51151	0.526189	0.520777	0.488743	0.539086	0.51966	0.501605	0.545814	0.468166	0.455579	0.469076	0.457768
3244.27	0.516969	0.531562	0.526014	0.494324	0.543808	0.524534	0.506227	0.550891	0.472861	0.460532	0.473693	0.462244
3246.2	0.520649	0.535497	0.530874	0.498843	0.547607	0.528834	0.510907	0.555649	0.477313	0.46512	0.478152	0.466225
3248.13	0.525883	0.540828	0.536264	0.503795	0.552637	0.534539	0.516171	0.559846	0.482542	0.470451	0.484101	0.471472
3250.05	0.532089	0.546729	0.541674	0.509068	0.558198	0.540027	0.52102	0.565411	0.488644	0.47625	0.489933	0.47736
3251.98	0.53876	0.553189	0.548206	0.515407	0.563885	0.546057	0.526593	0.572022	0.494427	0.482736	0.495761	0.483221
3253.91	0.544157	0.559371	0.554925	0.521097	0.569815	0.551899	0.531969	0.577653	0.500047	0.489024	0.501544	0.488731
3255.84	0.54903	0.565539	0.559854	0.526705	0.575023	0.55694	0.537177	0.583146	0.506268	0.494951	0.506766	0.493936
3257.77	0.55456	0.571656	0.564847	0.532702	0.580034	0.562802	0.543106	0.588551	0.51264	0.501207	0.512771	0.499685
3259.7	0.560891	0.577487	0.571143	0.537498	0.585335	0.568337	0.548738	0.594184	0.518756	0.507089	0.519079	0.505968
3261.63	0.568121	0.58396	0.577661	0.543887	0.591203	0.574274	0.554092	0.600058	0.524392	0.513475	0.52503	0.511814
3263.56	0.574921	0.590759	0.584048	0.551571	0.597403	0.580546	0.560561	0.606059	0.530495	0.51994	0.531279	0.517451
3265.49	0.581212	0.596944	0.589724	0.558056	0.603429	0.586097	0.566519	0.611683	0.536698	0.525021	0.537765	0.523669
3267.41	0.58743	0.602654	0.595383	0.563703	0.609355	0.591596	0.571539	0.616899	0.541617	0.530392	0.543816	0.529518
3269.34	0.593189	0.608403	0.601895	0.569914	0.614756	0.597111	0.577491	0.622927	0.547245	0.536692	0.548539	0.535316
3271.27	0.598548	0.613996	0.60741	0.575342	0.619487	0.602248	0.582695	0.627819	0.552881	0.54232	0.553083	0.540174
3273.2	0.603066	0.618715	0.611106	0.579249	0.623492	0.605926	0.58585	0.632025	0.557127	0.546908	0.557597	0.544239
3275.13	0.60551	0.621826	0.614038	0.582271	0.626215	0.608791	0.58843	0.635776	0.560069	0.550289	0.561042	0.547931
3277.06	0.607139	0.625099	0.616922	0.584591	0.627744	0.611132	0.591175	0.637934	0.563129	0.55298	0.563886	0.5508
3278.99	0.60994	0.626933	0.619428	0.58666	0.629956	0.613947	0.593673	0.639871	0.566151	0.555578	0.566653	0.553657
3280.92	0.613012	0.628801	0.62127	0.589088	0.633106	0.616699	0.59585	0.642738	0.56796	0.55829	0.569214	0.555943
3282.84	0.614666	0.631721	0.623341	0.590634	0.635476	0.618573	0.597702	0.64507	0.569408	0.56052	0.571282	0.557785
3284.77	0.616273	0.633177	0.625926	0.591438	0.636729	0.620926	0.599421	0.646507	0.571568	0.561929	0.573078	0.559502
3286.7	0.618697	0.635353	0.628026	0.594364	0.638119	0.622475	0.600782	0.64825	0.57392	0.563622	0.574839	0.561541
3288.63	0.620637	0.638059	0.629578	0.597008	0.63992	0.623638	0.602122	0.65031	0.575508	0.565297	0.576642	0.563451
3290.56	0.622044	0.640124	0.631471	0.598452	0.641313	0.6254	0.603482	0.652222	0.577042	0.567218	0.578108	0.564578
3292.49	0.622328	0.640415	0.631568	0.599068	0.641917	0.626303	0.604166	0.652248	0.577497	0.567683	0.578857	0.565078
3294.42	0.622671	0.639878	0.631097	0.599137	0.643081	0.626262	0.604599	0.652229	0.577452	0.567982	0.579156	0.565472
3296.35	0.623378	0.640454	0.631965	0.600162	0.644064	0.626531	0.605023	0.653137	0.57805	0.568908	0.579498	0.566089
3298.28	0.622466	0.63944	0.631507	0.599149	0.643609	0.626876	0.604785	0.652855	0.578184	0.569384	0.579802	0.566456
3300.2	0.622548	0.639659	0.631627	0.598555	0.643737	0.627261	0.605216	0.653006	0.577859	0.569552	0.580937	0.56697
3302.13	0.62309	0.641603	0.632885	0.600112	0.644209	0.627613	0.60583	0.653823	0.577943	0.56967	0.581935	0.566922
3304.06	0.622199	0.641044	0.632547	0.600364	0.643993	0.628009	0.606054	0.654356	0.577997	0.569934	0.581689	0.566883
3305.99	0.623089	0.640808	0.632738	0.600329	0.644432	0.628507	0.6065	0.655268	0.578375	0.569964	0.582443	0.567354
3307.92	0.623766	0.641147	0.631961	0.59998	0.645086	0.629011	0.606293	0.655693	0.57851	0.569624	0.582378	0.567381
3309.85	0.621517	0.640082	0.629847	0.598077	0.644364	0.628412	0.605171	0.654357	0.577716	0.568843	0.581165	0.566831
3311.78	0.620358	0.639301	0.629852	0.596977	0.644737	0.6286	0.605202	0.653854	0.57717	0.569349	0.581744	0.56661
3313.71	0.619433	0.638207	0.629133	0.596334	0.644903	0.627572	0.605669	0.653926	0.576893	0.569332	0.581211	0.566189
3315.63	0.618802	0.638404	0.628656	0.596267	0.644232	0.628041	0.605638	0.654763	0.57725	0.568616	0.58084	0.565846
3317.56	0.61905	0.639213	0.629417	0.596747	0.645033	0.629742	0.606486	0.655818	0.576996	0.569015	0.581655	0.56657
3319.49	0.620577	0.639485	0.630552	0.597201	0.646454	0.630112	0.60811	0.656991	0.57709	0.57004	0.582201	0.567214
3321.42	0.622422	0.640098	0.63195	0.598408	0.648458	0.632437	0.609806	0.659585	0.578203	0.570891	0.583314	0.567677
3323.35	0.623942	0.642474	0.633525	0.600068	0.651495	0.635029	0.611936	0.661933	0.579778	0.57244	0.585451	0.569259
3325.28	0.626016	0.64409	0.636027	0.6019	0.654846	0.637113	0.615076	0.664712	0.581792	0.573709	0.587924	0.571862
3327.21	0.627191	0.645907	0.638067	0.6034	0.657403	0.639391	0.618096	0.667198	0.583701	0.575539	0.589405	0.573559
3329.14	0.628446	0.64866	0.639455	0.605068	0.659025	0.642057	0.621037	0.669341	0.585391	0.578054	0.591177	0.575158
3331.07	0.629982	0.649372	0.640526	0.607178	0.661297	0.644603	0.624081	0.672877	0.586261	0.579942	0.593244	0.577661
3332.99	0.632228	0.649962	0.641865	0.608251	0.663806	0.648136	0.625574	0.675743	0.587357	0.581532	0.594269	0.579062
3334.92	0.63392	0.650495	0.642607	0.608355	0.66511	0.649811	0.626594	0.676561	0.588092	0.581701	0.595066	0.579642
3336.85	0.632258	0.650173	0.64169	0.607801	0.665273	0.648935	0.626422	0.676983	0.587357	0.580285	0.594293	0.579201
3338.78	0.630848	0.649165	0.64067	0.607128	0.664677	0.648622	0.624971	0.676628	0.586378	0.578698	0.591948	0.578379
3340.71	0.630054	0.647269	0.640508	0.605533	0.663487	0.647177	0.622698	0.67513	0.58417	0.577203	0.591208	0.576927
3342.64	0.626979	0.645037	0.638546	0.602697	0.661207	0.644048	0.620418	0.672879	0.581051	0.574801	0.590354	0.574167
3344.57	0.622973	0.642687	0.634771	0.600015	0.658079	0.641208	0.619186	0.669691	0.578084	0.571906	0.586804	0.570942
3346.5	0.619198	0.639651	0.630804	0.596518	0.654949	0.638426	0.616233	0.667432	0.574202	0.568783	0.582508	0.567652
3348.42	0.616316	0.634952	0.626489	0.592355	0.651299	0.634374	0.612704	0.664208	0.570703	0.565147	0.57849	0.564091
3350.35	0.611854	0.630273	0.621755	0.587457	0.646996	0.629692	0.608749	0.658523	0.566437	0.560065	0.574169	0.559801
3352.28	0.606632	0.625661	0.616296	0.581966	0.642836	0.624588	0.603791	0.652657	0.561775	0.555098	0.569596	0.554673
3354.21	0.601959	0.619939	0.611135	0.576887	0.638392	0.620585	0.598611	0.648037	0.557693	0.550841	0.564723	0.549427
3356.14	0.596074	0.614119	0.605739	0.570747	0.632037	0.61553	0.59262	0.642906	0.551762	0.545559	0.558831	0.543945
3358.07	0.590689	0.608852	0.600412	0.56487	0.626	0.609668	0.587292	0.636872	0.545906	0.539843	0.552686	0.539105
3360	0.586494	0.604658	0.595318	0.560168	0.621691	0.605297	0.58248	0.632014	0.5409	0.53424	0.547726	0.534967
3361.93	0.580666	0.599295	0.589438	0.555156	0.617204	0.599901	0.57648	0.626181	0.535367	0.528542	0.542582	0.529693
3363.86	0.575528	0.593604	0.584558	0.550713	0.612424	0.594336	0.57219	0.621177	0.530349	0.523122	0.538162	0.524744
3365.78	0.57107	0.58858	0.579881	0.546015	0.607234	0.589481	0.567987	0.616341	0.525144	0.518321	0.533426	0.519633
3367.71	0.565425	0.583537	0.574894	0.540644	0.602418	0.584882	0.562713	0.611155	0.519771	0.513332	0.528025	0.514562
3369.64	0.560524	0.578453	0.57021	0.535563	0.597766	0.580127	0.558518	0.606564	0.515418	0.508458	0.522986	0.509871
3371.57	0.555732	0.574185	0.565577	0.530917	0.59363	0.575547	0.554606	0.602263	0.511121	0.504123	0.518724	0.505506
3373.5	0.550931	0.570176	0.561561	0.526398	0.589685	0.570964	0.549678	0.59772	0.506424	0.499607	0.514426	0.500948
3375.43	0.546518	0.56516	0.55669	0.521705	0.584985	0.566677	0.544358	0.592349	0.50197	0.494769	0.509719	0.495755
3377.36	0.540984	0.560181	0.551518	0.516642	0.580347	0.561581	0.53984	0.588184	0.497196	0.490187	0.505642	0.491588
3379.29	0.536438	0.555581	0.547106	0.512267	0.575682	0.556759	0.535686	0.584217	0.493054	0.486006	0.501146	0.48793
3381.21	0.532952	0.551481	0.543744	0.5082	0.571635	0.553481	0.531306	0.579892	0.488992	0.481678	0.496892	0.483658
3383.14	0.529175	0.548075	0.540461	0.503915	0.5685	0.549736	0.527114	0.575851	0.48466	0.47772	0.49297	0.47909
3385.07	0.524628	0.542632	0.534954	0.498729	0.564173	0.544759	0.522166	0.570614	0.480516	0.473242	0.488415	0.474464
3387	0.519831	0.537608	0.530056	0.494934	0.559562	0.54125	0.517761	0.566223	0.476771	0.468751	0.484515	0.470726
3388.93	0.516361	0.534855	0.527701	0.492534	0.555663	0.538381	0.514652	0.562994	0.473435	0.465014	0.48075	0.467543
3390.86	0.513605	0.532246	0.524994	0.489815	0.553763	0.535335	0.512378	0.559779	0.471095	0.462029	0.477431	0.465044
3392.79	0.507863	0.527188	0.519193	0.484892	0.549935	0.530672	0.507975	0.554629	0.46714	0.457945	0.473149	0.460726
3394.72	0.504346	0.523301	0.515022	0.480948	0.545073	0.526813	0.503866	0.551045	0.463106	0.454579	0.469145	0.457202
3396.64	0.501767	0.520565	0.511828	0.477661	0.542231	0.523933	0.501603	0.54881	0.459853	0.451554	0.466304	0.454364
3398.57	0.496872	0.515856	0.507548	0.472228	0.538742	0.519301	0.497849	0.544978	0.454861	0.447215	0.462651	0.450129
3400.5	0.494675	0.512575	0.504602	0.469379	0.535579	0.516352	0.495205	0.542341	0.452033	0.444496	0.459719	0.447799
3402.43	0.491241	0.509418	0.501685	0.46629	0.532799	0.513408	0.492158	0.539085	0.449401	0.441542	0.456887	0.445121
3404.36	0.48756	0.506216	0.498981	0.462895	0.529936	0.510449	0.48827	0.536061	0.446063	0.437854	0.45374	0.441588
3406.29	0.484723	0.503662	0.496224	0.460203	0.526643	0.507766	0.484978	0.533274	0.442307	0.435117	0.450631	0.438601
3408.22	0.480783	0.500125	0.49274	0.456789	0.523756	0.504487	0.482164	0.529568	0.43894	0.432158	0.447517	0.435772
3410.15	0.47729	0.49639	0.488601	0.453443	0.52099	0.501338	0.479226	0.526335	0.437134	0.428503	0.444476	0.432436
3412.08	0.473957	0.493092	0.484146	0.450165	0.517748	0.497556	0.476344	0.52279	0.433993	0.425516	0.441041	0.429295
3414	0.469773	0.488864	0.479841	0.446322	0.513465	0.49354	0.472321	0.518088	0.429532	0.421639	0.437331	0.426177
3415.93	0.465921	0.48442	0.476268	0.441661	0.508876	0.490022	0.467131	0.513736	0.424883	0.417301	0.433864	0.422475
3417.86	0.463033	0.481546	0.473662	0.438647	0.506148	0.487282	0.463767	0.511537	0.421571	0.414149	0.430666	0.419388
3419.79	0.458198	0.477628	0.469322	0.433975	0.502693	0.483145	0.459306	0.508449	0.418094	0.409967	0.42621	0.415513
3421.72	0.45097	0.470804	0.461981	0.427185	0.496801	0.476916	0.452503	0.501813	0.412605	0.404448	0.420207	0.409716
3423.65	0.445637	0.465795	0.456941	0.423223	0.491713	0.472185	0.448167	0.496458	0.408081	0.40005	0.41584	0.405109
3425.58	0.442788	0.46223	0.453933	0.420283	0.487604	0.468444	0.445019	0.49334	0.404591	0.396162	0.4126	0.401925
3427.51	0.439618	0.457969	0.450033	0.416343	0.483298	0.464183	0.440953	0.489364	0.40041	0.391968	0.408497	0.397821
3429.43	0.434695	0.453098	0.445611	0.41164	0.479021	0.460156	0.436719	0.484177	0.396302	0.387831	0.404167	0.393395
3431.36	0.430085	0.447686	0.441303	0.407333	0.474242	0.455749	0.432671	0.47896	0.392196	0.383587	0.400042	0.38951
3433.29	0.425645	0.443243	0.437117	0.402954	0.46951	0.450331	0.428578	0.474888	0.387676	0.379568	0.395965	0.385722
3435.22	0.421206	0.439973	0.432999	0.398767	0.466092	0.445777	0.424312	0.470773	0.383918	0.375581	0.391713	0.382123
3437.15	0.416638	0.435936	0.428796	0.39422	0.462317	0.442265	0.419771	0.46596	0.380213	0.371497	0.387561	0.377827
3439.08	0.412215	0.431819	0.424471	0.389838	0.45801	0.438899	0.415756	0.462178	0.376397	0.367479	0.384166	0.374286
3441.01	0.408972	0.428909	0.421137	0.386129	0.454556	0.435625	0.412488	0.459325	0.372752	0.36397	0.380996	0.371766
3442.94	0.40378	0.423809	0.416442	0.380843	0.450612	0.430929	0.406919	0.454882	0.36874	0.359789	0.376776	0.366941
3444.87	0.401489	0.42078	0.413362	0.378517	0.448223	0.428364	0.403709	0.452462	0.366097	0.356954	0.374181	0.364323
3446.79	0.396708	0.416052	0.408288	0.37314	0.443596	0.423527	0.398852	0.447764	0.362364	0.352853	0.369764	0.360694
3448.72	0.389525	0.409158	0.402039	0.366434	0.437534	0.416596	0.392065	0.440951	0.357067	0.34703	0.363594	0.35539
3450.65	0.387464	0.406898	0.400254	0.365176	0.434565	0.41423	0.389884	0.438858	0.3532	0.344002	0.361349	0.353257
3452.58	0.383949	0.403571	0.397143	0.361792	0.430816	0.410457	0.387059	0.435441	0.349696	0.341046	0.35883	0.349657
3454.51	0.379391	0.399755	0.393028	0.357648	0.427367	0.406296	0.383806	0.431312	0.346241	0.337978	0.355593	0.346171
3456.44	0.375064	0.395859	0.388722	0.352895	0.423764	0.402968	0.380045	0.427524	0.342585	0.334073	0.351794	0.343163
3458.37	0.37169	0.39158	0.385111	0.34937	0.419909	0.399196	0.376734	0.423839	0.339181	0.329846	0.347828	0.339606
3460.3	0.368344	0.38788	0.381928	0.346852	0.41661	0.395997	0.373773	0.42089	0.336152	0.326699	0.344478	0.336405
3462.22	0.363252	0.383228	0.378025	0.341926	0.412267	0.39157	0.368646	0.416219	0.332028	0.322906	0.340463	0.332382
3464.15	0.359674	0.379274	0.374088	0.338476	0.407722	0.387512	0.364289	0.41187	0.32757	0.31898	0.336748	0.328538
3466.08	0.356441	0.376264	0.370014	0.33541	0.403998	0.385047	0.36094	0.408605	0.32438	0.315668	0.333397	0.325275
3468.01	0.352397	0.372646	0.365939	0.330633	0.400559	0.381099	0.356656	0.404296	0.320814	0.312053	0.329448	0.321596
3469.94	0.349464	0.369326	0.362328	0.327447	0.397697	0.377211	0.352982	0.400396	0.317111	0.308617	0.326328	0.318794
3471.87	0.345371	0.365441	0.358224	0.323626	0.393676	0.373509	0.349519	0.396864	0.313506	0.305122	0.323235	0.315792
3473.8	0.341131	0.361666	0.354245	0.319585	0.389675	0.369345	0.346118	0.393456	0.309904	0.301416	0.319558	0.312022
3475.73	0.336276	0.356904	0.349799	0.315326	0.385884	0.364719	0.341723	0.388656	0.305935	0.297341	0.315662	0.307942
3477.66	0.333386	0.353513	0.346937	0.312262	0.38255	0.361912	0.338115	0.385739	0.302291	0.294238	0.312551	0.304691
3479.58	0.33101	0.351095	0.343957	0.310026	0.38025	0.359734	0.335373	0.38389	0.299859	0.291612	0.309883	0.301759
3481.51	0.325285	0.345732	0.338729	0.304187	0.376039	0.354538	0.330454	0.378885	0.296169	0.287088	0.30568	0.297901
3483.44	0.320002	0.340524	0.334001	0.299093	0.370775	0.349215	0.325476	0.373963	0.291357	0.282397	0.30094	0.294194
3485.37	0.318564	0.338393	0.331862	0.297548	0.3678	0.346642	0.323566	0.371563	0.288278	0.279963	0.298539	0.291644
3487.3	0.315083	0.334675	0.32865	0.293773	0.363761	0.34334	0.319691	0.367747	0.285727	0.276662	0.295606	0.288183
3489.23	0.309514	0.330006	0.323593	0.288851	0.358943	0.339001	0.314339	0.362903	0.281666	0.272602	0.291623	0.284116
3491.16	0.306055	0.327318	0.319985	0.285817	0.355958	0.335473	0.311072	0.359552	0.277625	0.269125	0.288484	0.28095
3493.09	0.303104	0.32418	0.317155	0.28331	0.352957	0.332179	0.308553	0.356474	0.274529	0.26573	0.285433	0.278661
3495.01	0.29981	0.319772	0.313518	0.27994	0.349492	0.328782	0.305722	0.353131	0.271471	0.262575	0.282348	0.276014
3496.94	0.295507	0.315148	0.309657	0.275113	0.345404	0.324282	0.30079	0.348861	0.267575	0.25875	0.27863	0.27211
3498.87	0.292567	0.313195	0.307628	0.272852	0.342497	0.32183	0.297494	0.346291	0.264809	0.256194	0.276042	0.269809
3500.8	0.290848	0.312117	0.305049	0.271314	0.341648	0.321187	0.29609	0.345148	0.264288	0.255071	0.274236	0.267886
3502.73	0.285252	0.306577	0.299322	0.264949	0.337873	0.316468	0.29141	0.341109	0.261445	0.251062	0.270111	0.263676
3504.66	0.278495	0.300239	0.294443	0.258891	0.331259	0.310007	0.285614	0.335417	0.255266	0.245141	0.265132	0.258619
3506.59	0.277747	0.299536	0.293735	0.25825	0.328461	0.30835	0.284744	0.333111	0.251959	0.243221	0.263309	0.256581
3508.52	0.276089	0.297587	0.291389	0.255663	0.326712	0.30632	0.282276	0.331429	0.249923	0.241542	0.261115	0.25492
3510.45	0.269605	0.291381	0.285506	0.249685	0.321521	0.300397	0.275799	0.326042	0.245443	0.236371	0.256305	0.250052
3512.37	0.266228	0.287979	0.282257	0.246738	0.316945	0.29643	0.272407	0.321573	0.241355	0.232013	0.252725	0.246449
3514.3	0.263536	0.285373	0.279773	0.243997	0.313839	0.293609	0.269593	0.318737	0.238055	0.228733	0.249925	0.244055
3516.23	0.260277	0.282488	0.276765	0.24144	0.311169	0.29044	0.266912	0.316202	0.235252	0.226059	0.246931	0.241477
3518.16	0.256554	0.279073	0.273731	0.238284	0.308144	0.287245	0.263885	0.313194	0.232328	0.223255	0.243709	0.238626
3520.09	0.253703	0.276217	0.271162	0.235999	0.30528	0.285295	0.261632	0.310666	0.229867	0.220676	0.24202	0.2364
3522.02	0.252607	0.274639	0.269181	0.234113	0.304324	0.284424	0.260162	0.309343	0.228678	0.219105	0.2407	0.235034
3523.95	0.247621	0.269398	0.264924	0.228531	0.301237	0.279861	0.255381	0.304998	0.22534	0.215763	0.236729	0.23162
3525.88	0.244844	0.265933	0.261726	0.225691	0.297725	0.276083	0.252226	0.301928	0.221837	0.21293	0.233948	0.228763
3527.8	0.240115	0.26211	0.257491	0.221335	0.293567	0.271952	0.24816	0.298408	0.218004	0.209469	0.230583	0.225344
3529.73	0.234444	0.257453	0.252665	0.21635	0.288457	0.266896	0.242353	0.293285	0.213624	0.204885	0.226285	0.220951
3531.66	0.231753	0.254698	0.249839	0.213763	0.284122	0.263412	0.238688	0.289493	0.210073	0.201222	0.22304	0.218138
3533.59	0.229819	0.253152	0.247691	0.212238	0.280925	0.26079	0.237006	0.286842	0.206973	0.19876	0.220955	0.21605
3535.52	0.226731	0.250384	0.244988	0.209107	0.278472	0.258176	0.234561	0.284052	0.204536	0.196317	0.218659	0.213476
3537.45	0.221289	0.244444	0.24035	0.203784	0.274279	0.253865	0.229175	0.279206	0.200494	0.192116	0.21416	0.209155
3539.38	0.218654	0.241768	0.237107	0.201589	0.270925	0.250818	0.225804	0.276323	0.197057	0.188886	0.21134	0.206456
3541.31	0.217252	0.240802	0.235251	0.200545	0.268839	0.249257	0.224715	0.274884	0.195662	0.18736	0.210025	0.205211
3543.23	0.216118	0.239142	0.233264	0.198832	0.268142	0.248548	0.223835	0.273639	0.195334	0.186658	0.208678	0.203664
3545.16	0.211641	0.234447	0.22869	0.193684	0.265911	0.244976	0.219531	0.269705	0.193658	0.18405	0.205527	0.200323
3547.09	0.204405	0.227892	0.222881	0.187202	0.259751	0.238217	0.212472	0.263905	0.188072	0.178748	0.200589	0.195631
3549.02	0.201721	0.225392	0.221019	0.185488	0.255803	0.234818	0.210009	0.261539	0.183537	0.175441	0.197782	0.193165
3550.95	0.200496	0.224576	0.219522	0.184499	0.254274	0.233718	0.209258	0.260819	0.182092	0.174061	0.196484	0.192021
3552.88	0.194244	0.219238	0.214217	0.178081	0.249712	0.228863	0.20345	0.256055	0.178066	0.169681	0.192827	0.188012
3554.81	0.190503	0.215368	0.210947	0.174269	0.245002	0.224717	0.199248	0.251557	0.173214	0.165151	0.189356	0.184293
3556.74	0.189122	0.21359	0.209031	0.173376	0.242188	0.222719	0.197187	0.249079	0.170343	0.162726	0.187466	0.182431
3558.67	0.186382	0.210878	0.206285	0.17108	0.240026	0.22065	0.194887	0.246564	0.168424	0.161149	0.185397	0.180626
3560.59	0.182707	0.207722	0.203414	0.167893	0.237806	0.218111	0.192549	0.244051	0.166723	0.158925	0.182904	0.178604
3562.52	0.180193	0.20555	0.201876	0.166175	0.236629	0.216023	0.19077	0.24295	0.165286	0.157188	0.181255	0.177248
3564.45	0.180541	0.205292	0.20041	0.165872	0.237774	0.216232	0.191524	0.244445	0.166101	0.15791	0.180903	0.177257
3566.38	0.174852	0.200073	0.193335	0.157431	0.234413	0.211972	0.185557	0.240512	0.165309	0.155283	0.177059	0.173419
3568.31	0.163802	0.190152	0.185566	0.147322	0.22407	0.2017	0.17459	0.229806	0.156321	0.146582	0.169286	0.165432
3570.24	0.162137	0.188013	0.184955	0.147822	0.219467	0.198809	0.172576	0.226308	0.149972	0.14258	0.166739	0.162809
3572.17	0.16225	0.187113	0.183609	0.147644	0.216865	0.197689	0.171236	0.224864	0.146719	0.140571	0.165439	0.161654
3574.1	0.159632	0.184082	0.18075	0.144651	0.213766	0.194732	0.168464	0.222385	0.143888	0.137906	0.163411	0.15955
3576.02	0.155952	0.180801	0.177273	0.141343	0.21049	0.191178	0.16501	0.219408	0.141158	0.135305	0.16104	0.15705
3577.95	0.153086	0.178292	0.174099	0.138829	0.207022	0.188421	0.162026	0.216221	0.138325	0.132622	0.158377	0.154455
3579.88	0.149509	0.174874	0.171343	0.135783	0.204021	0.185603	0.159638	0.212913	0.135713	0.129849	0.155821	0.151569
3581.81	0.146428	0.172097	0.16913	0.133474	0.201797	0.183051	0.157516	0.210657	0.133103	0.127361	0.153845	0.149468
3583.74	0.145433	0.171396	0.167927	0.132247	0.200829	0.182257	0.156534	0.210172	0.132238	0.12646	0.152719	0.148811
3585.67	0.145082	0.170715	0.165601	0.130376	0.201188	0.181863	0.157132	0.209967	0.133883	0.126816	0.151718	0.148396
3587.6	0.136736	0.163611	0.158874	0.122469	0.196722	0.175239	0.149835	0.203992	0.130858	0.122725	0.147369	0.143772
3589.53	0.130507	0.15814	0.154589	0.118291	0.189551	0.169224	0.142773	0.197934	0.122961	0.117017	0.143056	0.139063
3591.46	0.131779	0.158573	0.154669	0.11994	0.187602	0.169193	0.143318	0.19758	0.120462	0.115514	0.142439	0.138728
3593.38	0.129989	0.156963	0.152648	0.118092	0.186356	0.16795	0.141516	0.196728	0.120084	0.114407	0.140927	0.138051
3595.31	0.124999	0.152497	0.14859	0.112943	0.183141	0.163969	0.137034	0.193337	0.117086	0.11149	0.137652	0.135104
3597.24	0.122466	0.149874	0.14613	0.110613	0.179923	0.160911	0.134118	0.190357	0.113477	0.108536	0.135394	0.132296
3599.17	0.120612	0.147732	0.143553	0.108673	0.17713	0.158608	0.132311	0.188208	0.111102	0.10624	0.133425	0.130284
3601.1	0.116778	0.143796	0.140244	0.105101	0.17331	0.154631	0.12882	0.184398	0.107797	0.10312	0.130584	0.127561
3603.03	0.114007	0.141479	0.138805	0.103464	0.16988	0.151916	0.12619	0.181592	0.104574	0.100957	0.128666	0.125526
3604.96	0.11345	0.141024	0.137795	0.103059	0.168982	0.151405	0.126375	0.181134	0.103935	0.100618	0.128088	0.12504
3606.89	0.112514	0.139567	0.135072	0.100966	0.169185	0.150773	0.125572	0.180418	0.104705	0.100169	0.127345	0.124456
3608.81	0.107826	0.135744	0.132232	0.096411	0.166006	0.14701	0.120577	0.176958	0.102682	0.097343	0.124711	0.121666
3610.74	0.106246	0.133959	0.130695	0.095042	0.163884	0.144601	0.1187	0.175241	0.100584	0.095487	0.122806	0.119781
3612.67	0.104248	0.132066	0.128182	0.09289	0.163303	0.143548	0.11664	0.174273	0.099994	0.094697	0.121573	0.119474
3614.6	0.099233	0.12805	0.125619	0.088649	0.159925	0.140104	0.112383	0.170721	0.096923	0.09234	0.119333	0.117536
3616.53	0.09909	0.127372	0.124323	0.088296	0.158085	0.138573	0.112211	0.169872	0.094575	0.091084	0.117992	0.116063
3618.46	0.096638	0.126078	0.120736	0.086194	0.155721	0.135576	0.110033	0.168456	0.092617	0.088984	0.11578	0.113817
3620.39	0.091355	0.121236	0.117524	0.082104	0.150146	0.130089	0.10445	0.16265	0.087885	0.084385	0.112443	0.109786
3622.32	0.090269	0.119197	0.117056	0.081252	0.146391	0.128539	0.102637	0.159706	0.08402	0.081447	0.110941	0.108087
3624.25	0.089905	0.118631	0.116375	0.081168	0.145426	0.128686	0.102679	0.15975	0.082953	0.080733	0.111117	0.108526
3626.17	0.090683	0.118363	0.114695	0.080382	0.146644	0.129776	0.103473	0.160455	0.084786	0.082096	0.111192	0.108912
3628.1	0.088325	0.117422	0.11017	0.077506	0.146935	0.128797	0.101346	0.160223	0.086426	0.082139	0.109849	0.107923
3630.03	0.079158	0.111063	0.10663	0.071455	0.14085	0.121582	0.092557	0.153431	0.080373	0.076681	0.105433	0.10357
3631.96	0.079881	0.109776	0.107053	0.071487	0.13738	0.11979	0.092823	0.150991	0.076544	0.074544	0.103763	0.101603
3633.89	0.07868	0.10855	0.105518	0.070403	0.134664	0.117584	0.091588	0.149918	0.074049	0.072889	0.102763	0.10038
3635.82	0.07677	0.106818	0.103856	0.068686	0.132153	0.115188	0.089017	0.147901	0.071545	0.070981	0.101125	0.098353
3637.75	0.075437	0.105696	0.102891	0.067898	0.130663	0.113849	0.088389	0.146977	0.070319	0.069873	0.100273	0.097383
3639.68	0.074158	0.103894	0.101593	0.066437	0.129074	0.112685	0.087028	0.145593	0.069339	0.068725	0.099096	0.096338
3641.6	0.073113	0.102775	0.100352	0.065391	0.128325	0.112134	0.08547	0.144965	0.069039	0.067919	0.098416	0.096192
3643.53	0.070974	0.101598	0.099691	0.064118	0.128228	0.111398	0.0842	0.144425	0.068518	0.067155	0.097735	0.095909
3645.46	0.071689	0.102426	0.098803	0.06406	0.130103	0.112458	0.086437	0.145688	0.070465	0.068549	0.097887	0.096499
3647.39	0.070717	0.101519	0.095909	0.062108	0.132443	0.112972	0.086791	0.146999	0.073611	0.070143	0.098158	0.097445
3649.32	0.067442	0.097597	0.091783	0.05837	0.129618	0.109755	0.08155	0.143359	0.071676	0.067341	0.095248	0.094348
3651.25	0.061584	0.094415	0.091446	0.055364	0.123425	0.103902	0.075385	0.13819	0.064934	0.063035	0.092891	0.09111
3653.18	0.061971	0.093635	0.091707	0.056198	0.12031	0.102878	0.075814	0.136465	0.061439	0.061601	0.091927	0.089439
3655.11	0.063327	0.093775	0.090072	0.056118	0.11922	0.102775	0.076602	0.137012	0.060579	0.060865	0.091649	0.089143
3657.04	0.060491	0.091363	0.088847	0.053453	0.116284	0.099862	0.072401	0.13464	0.05826	0.058017	0.090149	0.08716
3658.96	0.0598	0.090529	0.088147	0.053081	0.11403	0.098485	0.071527	0.132733	0.056474	0.056349	0.088721	0.085572
3660.89	0.059274	0.089749	0.087457	0.052371	0.112633	0.09722	0.07095	0.131749	0.054689	0.055647	0.087903	0.085297
3662.82	0.057982	0.088576	0.086555	0.051497	0.111486	0.096338	0.06982	0.130618	0.053443	0.055011	0.08714	0.084761
3664.75	0.056704	0.088258	0.085714	0.050961	0.111543	0.096243	0.069743	0.130398	0.053392	0.054795	0.086836	0.084787
3666.68	0.056714	0.087802	0.085374	0.050533	0.112749	0.097107	0.070492	0.130783	0.054641	0.055605	0.086717	0.085226
3668.61	0.057004	0.087531	0.083346	0.049061	0.114741	0.098652	0.071704	0.131883	0.057685	0.056842	0.086713	0.0861
3670.54	0.052006	0.085546	0.081885	0.046496	0.114504	0.096451	0.06745	0.130509	0.057261	0.055591	0.086301	0.086091
3672.47	0.053468	0.084696	0.08171	0.047036	0.112871	0.095678	0.066873	0.129089	0.055766	0.054996	0.085426	0.084137
3674.39	0.05467	0.085945	0.080048	0.046886	0.113995	0.096332	0.068872	0.131204	0.05797	0.055833	0.085471	0.08535
3676.32	0.049361	0.08421	0.079441	0.043551	0.11233	0.093001	0.064614	0.128778	0.055376	0.053439	0.084364	0.084154
3678.25	0.050335	0.082784	0.079099	0.043596	0.108825	0.091683	0.063755	0.126076	0.051917	0.051824	0.083021	0.081483
3680.18	0.04934	0.082219	0.079077	0.044161	0.106305	0.090263	0.062545	0.12477	0.049298	0.050367	0.08226	0.080333
3682.11	0.049015	0.081636	0.079525	0.044643	0.104798	0.089599	0.062138	0.123805	0.047189	0.049347	0.081633	0.079328
3684.04	0.049063	0.081025	0.079403	0.044797	0.105025	0.089729	0.063119	0.124195	0.047078	0.049357	0.08181	0.080101
3685.97	0.048876	0.080998	0.07843	0.044282	0.106481	0.090484	0.064638	0.124735	0.048387	0.050243	0.082125	0.081031
3687.9	0.048721	0.081957	0.077049	0.043284	0.108172	0.091366	0.065164	0.125553	0.050734	0.051251	0.082508	0.081819
3689.83	0.047733	0.080462	0.076836	0.04183	0.107754	0.090345	0.062245	0.124842	0.051018	0.050144	0.081916	0.081034
3691.75	0.046136	0.078866	0.076974	0.041889	0.104998	0.088182	0.060122	0.12334	0.047902	0.048564	0.080729	0.07942
3693.68	0.046226	0.078939	0.076861	0.042178	0.103139	0.087378	0.059877	0.122418	0.045352	0.047633	0.080226	0.078395
3695.61	0.046557	0.079151	0.076551	0.041971	0.102345	0.08739	0.060033	0.122445	0.044787	0.04747	0.080485	0.078207
3697.54	0.045669	0.078881	0.076407	0.041764	0.102204	0.086945	0.05992	0.12261	0.044595	0.04747	0.080545	0.078142
3699.47	0.046593	0.078817	0.075662	0.041958	0.102682	0.087578	0.060792	0.122929	0.04517	0.047958	0.080557	0.078165
3701.4	0.046166	0.078868	0.074999	0.041455	0.102711	0.08764	0.0602	0.123212	0.045952	0.048093	0.080888	0.078742
3703.33	0.045681	0.078599	0.076249	0.041031	0.101805	0.086528	0.058968	0.121962	0.044615	0.046972	0.079992	0.078197
3705.26	0.046046	0.078619	0.076563	0.041214	0.10197	0.086854	0.059728	0.122102	0.044233	0.047107	0.079765	0.078343
3707.18	0.045764	0.07902	0.075861	0.040814	0.10344	0.087942	0.06084	0.123327	0.045625	0.048164	0.080567	0.079282
3709.11	0.046468	0.079563	0.075332	0.040199	0.105956	0.089703	0.061929	0.124969	0.048407	0.049572	0.08182	0.080199
3711.04	0.046251	0.07901	0.074523	0.039723	0.107077	0.090168	0.060817	0.126079	0.050672	0.050294	0.082315	0.080709
3712.97	0.045175	0.078087	0.074774	0.039169	0.104714	0.087707	0.058629	0.123936	0.048424	0.048753	0.081395	0.079643
3714.9	0.045114	0.078292	0.075309	0.039663	0.102929	0.086778	0.058826	0.122524	0.045896	0.047698	0.080423	0.078299
3716.83	0.045151	0.078683	0.07533	0.040416	0.102497	0.086819	0.059391	0.122623	0.045211	0.047778	0.080584	0.078133
3718.76	0.044849	0.078391	0.075193	0.039972	0.103507	0.087578	0.059879	0.123122	0.045561	0.048453	0.081247	0.078786
3720.69	0.044829	0.078411	0.074602	0.039551	0.104561	0.088537	0.060786	0.12385	0.046719	0.049015	0.081445	0.079141
3722.61	0.044834	0.078791	0.074442	0.039743	0.105468	0.088877	0.061018	0.124671	0.048397	0.049266	0.081856	0.079585
3724.54	0.045411	0.078351	0.074648	0.040246	0.105566	0.089265	0.061099	0.124683	0.048637	0.049256	0.081376	0.079552
3726.47	0.044194	0.077888	0.074873	0.040515	0.104872	0.088626	0.060247	0.124261	0.047256	0.048673	0.081298	0.079403
3728.4	0.044043	0.077619	0.075175	0.040772	0.104026	0.087887	0.05968	0.122899	0.045281	0.047999	0.081154	0.078734
3730.33	0.045016	0.078176	0.07505	0.040985	0.104605	0.088861	0.06121	0.123267	0.046017	0.048589	0.081462	0.079985
3732.26	0.044492	0.078465	0.075516	0.040302	0.107366	0.090272	0.061813	0.125103	0.050136	0.050227	0.082329	0.081925
3734.19	0.046835	0.07885	0.074714	0.039965	0.109898	0.091973	0.063006	0.126238	0.054466	0.052181	0.082504	0.081999
3736.12	0.045465	0.078033	0.074475	0.039236	0.109892	0.09126	0.060422	0.125468	0.053656	0.05118	0.082203	0.081039
3738.05	0.045228	0.076805	0.075653	0.040401	0.106994	0.089105	0.058877	0.123469	0.049595	0.049077	0.081337	0.079378
3739.97	0.044765	0.077395	0.075976	0.040715	0.10641	0.088843	0.059686	0.123835	0.048625	0.048991	0.082246	0.080429
3741.9	0.045279	0.077815	0.074805	0.040119	0.107372	0.08981	0.061146	0.12458	0.049801	0.04998	0.0823	0.080846
3743.83	0.046017	0.07913	0.072953	0.039185	0.107988	0.09057	0.061491	0.125664	0.051541	0.051015	0.082081	0.081521
3745.76	0.043629	0.078971	0.074919	0.038126	0.10947	0.089911	0.059126	0.124765	0.052251	0.050618	0.082536	0.082289
3747.69	0.045098	0.079112	0.074847	0.038341	0.110477	0.090977	0.060608	0.125979	0.052452	0.051441	0.08272	0.083178
3749.62	0.044741	0.080483	0.073268	0.037819	0.111657	0.091602	0.061006	0.129109	0.053598	0.052322	0.083202	0.084393
3751.55	0.043543	0.079215	0.073162	0.038134	0.10994	0.089369	0.059633	0.127354	0.052702	0.051537	0.083106	0.08264
3753.48	0.043329	0.078241	0.074432	0.038837	0.106702	0.087675	0.058518	0.124608	0.04907	0.049497	0.082111	0.080612
3755.4	0.044499	0.078446	0.075339	0.03935	0.105621	0.087825	0.059268	0.124403	0.047614	0.048349	0.081421	0.08019
3757.33	0.045173	0.078909	0.07492	0.039048	0.105409	0.088099	0.060326	0.124973	0.047964	0.04873	0.081685	0.080484
3759.26	0.044502	0.078894	0.074448	0.038573	0.104677	0.087361	0.059359	0.124664	0.047646	0.048392	0.081312	0.080257
3761.19	0.043761	0.078661	0.075528	0.038873	0.103379	0.08652	0.057553	0.123646	0.045537	0.04725	0.080946	0.07958
3763.12	0.045215	0.078592	0.075434	0.039997	0.103329	0.087163	0.058778	0.123472	0.045363	0.047712	0.080904	0.079304
3765.05	0.045496	0.078993	0.074837	0.039711	0.104383	0.087551	0.059332	0.124824	0.046411	0.048379	0.08147	0.080153
3766.98	0.045108	0.079179	0.075224	0.039371	0.104702	0.087719	0.058734	0.125042	0.046373	0.048318	0.081497	0.079912
3768.91	0.045666	0.079447	0.074488	0.039693	0.103764	0.087828	0.059203	0.124969	0.046581	0.048515	0.081768	0.079835
3770.84	0.044641	0.079218	0.074858	0.039384	0.102996	0.086897	0.057624	0.124434	0.04556	0.047655	0.081713	0.079497
3772.76	0.044924	0.078735	0.075518	0.039985	0.102184	0.086346	0.057388	0.123444	0.043862	0.046763	0.081042	0.079004
3774.69	0.044969	0.078839	0.075777	0.040345	0.101821	0.086006	0.057772	0.123649	0.043118	0.046788	0.08135	0.07952
3776.62	0.045544	0.07869	0.075662	0.040704	0.102292	0.086618	0.058679	0.123907	0.043796	0.047322	0.081201	0.079273
3778.55	0.045955	0.078966	0.074871	0.040662	0.102673	0.086992	0.058991	0.124301	0.04489	0.047832	0.081309	0.079609
3780.48	0.044754	0.078779	0.075963	0.039823	0.103073	0.086821	0.057503	0.124208	0.044332	0.04741	0.081625	0.079788
3782.41	0.04548	0.078699	0.076333	0.039779	0.103232	0.087307	0.058555	0.124625	0.044461	0.047349	0.081598	0.079603
3784.34	0.045579	0.079576	0.075828	0.039862	0.103473	0.087378	0.059269	0.125825	0.045712	0.047675	0.082054	0.079978
3786.27	0.045245	0.079595	0.076188	0.040091	0.103227	0.086776	0.058367	0.125077	0.044777	0.047022	0.08215	0.079372
3788.19	0.045515	0.079402	0.076008	0.040661	0.102474	0.086207	0.058168	0.124345	0.043221	0.046513	0.081851	0.079198
3790.12	0.045423	0.079255	0.075846	0.040638	0.102091	0.086443	0.058445	0.124389	0.043005	0.046604	0.081541	0.079334
3792.05	0.045091	0.079297	0.076636	0.040188	0.102376	0.086824	0.058777	0.124309	0.043256	0.046858	0.08147	0.079436
3793.98	0.045678	0.079363	0.07581	0.040272	0.103516	0.087618	0.059735	0.124453	0.044292	0.047692	0.081757	0.079815
3795.91	0.04558	0.079428	0.074556	0.039703	0.105206	0.088489	0.059831	0.125233	0.046271	0.048565	0.082702	0.081046
3797.84	0.044752	0.079265	0.075734	0.039283	0.106595	0.089471	0.059336	0.125835	0.04803	0.04937	0.083333	0.081776
3799.77	0.047382	0.079493	0.07444	0.039992	0.106979	0.090529	0.061297	0.126547	0.049349	0.050436	0.08303	0.081881
3801.7	0.045244	0.079571	0.074509	0.039022	0.107642	0.088918	0.058995	0.127338	0.048982	0.050259	0.08388	0.08285
3803.63	0.044293	0.079353	0.076639	0.039286	0.106423	0.088272	0.057654	0.12581	0.046819	0.048768	0.083153	0.081414
3805.55	0.046549	0.080119	0.074781	0.039424	0.105066	0.088876	0.059815	0.126669	0.046851	0.048735	0.082604	0.08077
3807.48	0.045117	0.079563	0.075278	0.039047	0.10431	0.088069	0.058457	0.126249	0.045782	0.048068	0.082285	0.08066
3809.41	0.045003	0.079009	0.076402	0.040346	0.103574	0.087615	0.058172	0.124339	0.044109	0.047042	0.081876	0.080006
3811.34	0.045058	0.079362	0.076471	0.040481	0.103613	0.087801	0.058671	0.124692	0.043909	0.047121	0.082566	0.080475
3813.27	0.04608	0.079959	0.076556	0.04051	0.104738	0.089064	0.059912	0.125417	0.045373	0.047841	0.082894	0.080721
3815.2	0.046669	0.080629	0.075402	0.040135	0.106081	0.089745	0.060506	0.126742	0.047836	0.048767	0.083678	0.081667
3817.13	0.045245	0.080145	0.076442	0.039159	0.107693	0.089637	0.05898	0.127512	0.048558	0.049325	0.084408	0.082736
3819.06	0.047655	0.080568	0.075612	0.040386	0.10855	0.09086	0.061268	0.128089	0.050166	0.050654	0.084413	0.083108
3820.98	0.045933	0.080945	0.075051	0.039332	0.107908	0.089928	0.059099	0.129209	0.050768	0.050937	0.084804	0.084547
3822.91	0.04408	0.079662	0.077447	0.039415	0.106537	0.088879	0.057546	0.127454	0.04806	0.04892	0.083569	0.082328
3824.84	0.046235	0.080107	0.076869	0.040592	0.106167	0.089281	0.059916	0.12729	0.047252	0.048672	0.083294	0.081162
3826.77	0.045404	0.080844	0.077144	0.039716	0.106262	0.089174	0.059268	0.127423	0.046555	0.049006	0.083622	0.0816
3828.7	0.045541	0.080316	0.077816	0.039635	0.105958	0.08922	0.059064	0.127045	0.046216	0.04911	0.08351	0.081249
3830.63	0.046648	0.080123	0.076847	0.040462	0.105838	0.08963	0.0598	0.127596	0.046843	0.049367	0.083913	0.081912
3832.56	0.046312	0.08013	0.077304	0.04103	0.106962	0.090512	0.059776	0.128004	0.04714	0.049411	0.084581	0.08267
3834.49	0.046409	0.080244	0.077047	0.041074	0.108371	0.091265	0.060377	0.128904	0.048717	0.050423	0.084872	0.082889
3836.42	0.046269	0.080412	0.075574	0.040742	0.109815	0.091561	0.060627	0.13025	0.051232	0.051661	0.085087	0.083778
3838.34	0.045754	0.08199	0.075244	0.039542	0.110797	0.091438	0.060009	0.130297	0.052146	0.051593	0.085738	0.084377
3840.27	0.044969	0.082203	0.076843	0.039185	0.110202	0.09094	0.059111	0.129756	0.05089	0.050874	0.085022	0.083542
3842.2	0.046263	0.081011	0.077356	0.040107	0.108356	0.090285	0.059415	0.128462	0.048972	0.049837	0.083782	0.081922
3844.13	0.04651	0.080988	0.077686	0.040069	0.10676	0.089262	0.059462	0.126933	0.047182	0.048726	0.083629	0.081742
3846.06	0.046648	0.080711	0.078354	0.040818	0.105835	0.088943	0.059941	0.126081	0.045651	0.048156	0.083518	0.081555
3847.99	0.046934	0.080768	0.077761	0.041592	0.106778	0.090075	0.060987	0.12729	0.046759	0.049177	0.084524	0.082644
3849.92	0.047074	0.080769	0.077468	0.041487	0.109708	0.092152	0.062739	0.129605	0.050008	0.051348	0.086236	0.084576
3851.85	0.047696	0.082231	0.076759	0.040092	0.11301	0.093306	0.064459	0.132638	0.053955	0.054152	0.087512	0.086029
3853.77	0.045262	0.083455	0.075933	0.037982	0.112121	0.091326	0.059847	0.132258	0.053517	0.052323	0.086439	0.084949
3855.7	0.045788	0.08172	0.076848	0.039659	0.109147	0.090523	0.059033	0.128399	0.05051	0.050031	0.084842	0.082831
3857.63	0.046253	0.081023	0.0775	0.040445	0.107668	0.090554	0.059669	0.127608	0.048403	0.049919	0.084687	0.082274
3859.56	0.046999	0.081333	0.077749	0.040703	0.106802	0.09076	0.060119	0.128212	0.047062	0.049496	0.084711	0.082327
3861.49	0.047965	0.081715	0.077786	0.040782	0.108376	0.091319	0.060982	0.12942	0.048775	0.050603	0.085572	0.083446
3863.42	0.047958	0.081613	0.077453	0.040616	0.110164	0.091944	0.06179	0.130001	0.05097	0.052169	0.086288	0.084003
3865.35	0.045805	0.082289	0.078765	0.039991	0.11007	0.091358	0.060313	0.129494	0.050082	0.052112	0.086771	0.084238
3867.28	0.047406	0.082886	0.078593	0.041478	0.109998	0.092088	0.061196	0.129751	0.050007	0.05207	0.086379	0.083715
3869.2	0.047292	0.0844	0.077349	0.041446	0.111055	0.093358	0.061705	0.132272	0.052114	0.053282	0.087513	0.085648
3871.13	0.046529	0.083147	0.078074	0.039869	0.110926	0.09271	0.059898	0.130724	0.051148	0.052494	0.087478	0.085155
3873.06	0.048805	0.082356	0.076994	0.040964	0.109202	0.091604	0.061505	0.129297	0.050108	0.051556	0.08609	0.083557
3874.99	0.046339	0.082424	0.078533	0.040743	0.107625	0.090099	0.060169	0.129034	0.047968	0.050272	0.085727	0.083753
3876.92	0.046768	0.082358	0.07981	0.041461	0.107255	0.090443	0.060723	0.128259	0.046645	0.049971	0.085124	0.082982
3878.85	0.048187	0.083557	0.078326	0.041947	0.108258	0.091682	0.062648	0.129726	0.048897	0.051691	0.086099	0.083814
3880.78	0.04699	0.08395	0.078538	0.041413	0.109619	0.092284	0.061588	0.131371	0.050147	0.052333	0.08731	0.084933
3882.71	0.048139	0.083165	0.078605	0.042205	0.109673	0.092264	0.061667	0.130695	0.049668	0.051593	0.08637	0.083983
3884.64	0.04904	0.083727	0.077546	0.042268	0.109531	0.091964	0.06224	0.131027	0.050145	0.051595	0.086446	0.084034
3886.56	0.046529	0.082972	0.079788	0.041228	0.108817	0.090317	0.059743	0.130213	0.04833	0.050539	0.086507	0.084216
3888.49	0.047631	0.082154	0.080104	0.042059	0.107834	0.090782	0.060862	0.129445	0.047046	0.050321	0.085546	0.083964
3890.42	0.048581	0.083064	0.07858	0.042102	0.108193	0.092101	0.061822	0.130988	0.048399	0.051529	0.086102	0.085086
3892.35	0.047412	0.083268	0.078845	0.041522	0.109074	0.091856	0.060303	0.131066	0.048993	0.051139	0.086549	0.084796
3894.28	0.047299	0.082969	0.079614	0.042128	0.108619	0.091514	0.060496	0.130376	0.047726	0.050567	0.086042	0.08398
3896.21	0.048302	0.083019	0.079616	0.042483	0.108576	0.092424	0.061781	0.130609	0.04806	0.051232	0.086464	0.084162
3898.14	0.049128	0.083414	0.078162	0.042611	0.110019	0.093695	0.063314	0.131765	0.050792	0.05307	0.088063	0.085321
3900.07	0.047812	0.083741	0.078116	0.041679	0.112221	0.093897	0.063055	0.133296	0.052771	0.054266	0.089426	0.086528
3901.99	0.047789	0.084333	0.078389	0.041137	0.112892	0.094139	0.062849	0.134091	0.053584	0.05489	0.089121	0.08673
3903.92	0.047782	0.085509	0.078067	0.041169	0.111733	0.093795	0.061862	0.133815	0.053043	0.054345	0.088678	0.086733
3905.85	0.047766	0.084583	0.07959	0.041439	0.109138	0.0919	0.060458	0.13143	0.049607	0.051609	0.087336	0.085105
3907.78	0.048083	0.083703	0.080556	0.042198	0.107151	0.090573	0.060177	0.129796	0.046705	0.049902	0.086376	0.083673
3909.71	0.048113	0.083882	0.080234	0.042746	0.106326	0.090461	0.060439	0.129596	0.045544	0.04943	0.086408	0.083858
3911.64	0.048039	0.083807	0.080139	0.043187	0.106589	0.09074	0.060796	0.130139	0.045881	0.049968	0.086662	0.08446
3913.57	0.048653	0.084242	0.080327	0.043307	0.107596	0.091498	0.06176	0.130276	0.047062	0.051023	0.086606	0.084558
3915.5	0.049071	0.085231	0.080278	0.043208	0.109267	0.092937	0.062851	0.130903	0.048988	0.051987	0.087384	0.085139
3917.43	0.048599	0.085446	0.080582	0.043015	0.110225	0.093203	0.062068	0.131308	0.049918	0.052142	0.088287	0.085179
3919.35	0.048547	0.085643	0.080773	0.043049	0.109767	0.091979	0.061159	0.131299	0.048901	0.051639	0.08831	0.084841
3921.28	0.048583	0.085322	0.080625	0.042993	0.108969	0.091674	0.061461	0.131619	0.048228	0.051562	0.088172	0.084889
3923.21	0.049351	0.08508	0.079812	0.042713	0.109335	0.092695	0.062744	0.132175	0.049311	0.052613	0.088039	0.085504
3925.14	0.048586	0.084694	0.080626	0.042328	0.109881	0.092274	0.062056	0.132248	0.048972	0.052346	0.087869	0.085758
3927.07	0.047957	0.084447	0.081222	0.043033	0.109492	0.092027	0.061592	0.131398	0.047798	0.051578	0.087449	0.085276
3929	0.048734	0.085256	0.080485	0.043306	0.110222	0.093142	0.063087	0.132304	0.049049	0.052523	0.088546	0.086077
3930.93	0.049328	0.085777	0.08052	0.043019	0.110837	0.093451	0.063896	0.13317	0.050568	0.05297	0.089237	0.086627
3932.86	0.049125	0.08569	0.081323	0.043489	0.110123	0.092878	0.063058	0.132641	0.049997	0.052133	0.088537	0.086065
3934.78	0.049229	0.085404	0.081609	0.043722	0.109068	0.092081	0.061869	0.131383	0.047936	0.051168	0.087837	0.085032
3936.71	0.049449	0.085598	0.081106	0.043538	0.108721	0.091918	0.06173	0.130983	0.047412	0.050999	0.087702	0.084997
3938.64	0.049172	0.085749	0.081499	0.043187	0.109068	0.091828	0.061685	0.131441	0.047587	0.051247	0.088008	0.085238
3940.57	0.049912	0.085956	0.081261	0.043496	0.109511	0.092538	0.06293	0.132246	0.048348	0.051917	0.088317	0.085638
3942.5	0.049684	0.085923	0.080303	0.043287	0.110111	0.093673	0.063143	0.133251	0.049546	0.052611	0.088844	0.086571
3944.43	0.049275	0.085658	0.081045	0.043339	0.110131	0.093395	0.062223	0.133006	0.048715	0.052162	0.088562	0.085911
3946.36	0.050236	0.086092	0.081462	0.044004	0.110287	0.093444	0.063024	0.133325	0.049011	0.052254	0.08858	0.086106
3948.29	0.050148	0.08647	0.081792	0.043627	0.110846	0.093313	0.063097	0.13377	0.050105	0.0531	0.089214	0.08704
3950.22	0.049713	0.086401	0.082299	0.043073	0.110326	0.092804	0.062626	0.132938	0.049318	0.052573	0.088833	0.086236
3952.14	0.049993	0.086116	0.081779	0.043467	0.109328	0.092815	0.062312	0.132832	0.048087	0.051491	0.088434	0.085677
3954.07	0.050447	0.085584	0.081617	0.043702	0.108901	0.092591	0.062081	0.132916	0.047365	0.051317	0.088524	0.085758
3956	0.050205	0.085602	0.081759	0.043681	0.109377	0.092697	0.062285	0.132734	0.047505	0.051573	0.088798	0.085887
3957.93	0.049611	0.086145	0.081955	0.043735	0.109488	0.092502	0.062219	0.132918	0.047624	0.051404	0.088674	0.086055
3959.86	0.049799	0.086648	0.081737	0.043974	0.109526	0.092339	0.062244	0.132774	0.047783	0.051149	0.088809	0.086294
3961.79	0.050101	0.086487	0.081864	0.043883	0.109754	0.092769	0.062072	0.132992	0.048131	0.051595	0.089138	0.08635
3963.72	0.049959	0.085987	0.082369	0.043838	0.108921	0.092476	0.061671	0.13303	0.047489	0.051826	0.088801	0.085764
3965.65	0.050159	0.086068	0.081928	0.044384	0.10824	0.092357	0.061748	0.132991	0.046644	0.051524	0.088573	0.085476
3967.57	0.050036	0.086383	0.081791	0.044512	0.108957	0.092655	0.061787	0.133455	0.046912	0.051372	0.088978	0.085768
3969.5	0.050243	0.086867	0.082132	0.044068	0.109815	0.092769	0.061966	0.133925	0.047396	0.051764	0.089517	0.086083
3971.43	0.050818	0.08681	0.082218	0.04395	0.110377	0.093075	0.062488	0.133766	0.047707	0.051966	0.089304	0.086467
3973.36	0.050782	0.08668	0.081721	0.043984	0.110531	0.093085	0.063192	0.133262	0.048225	0.05176	0.089229	0.086608
3975.29	0.050423	0.086869	0.081695	0.044011	0.110106	0.092832	0.063245	0.133505	0.048182	0.051997	0.089487	0.086647
3977.22	0.050187	0.086758	0.081967	0.044455	0.109712	0.092882	0.063014	0.133688	0.047579	0.05169	0.08932	0.086539
3979.15	0.050341	0.086752	0.082075	0.044443	0.109428	0.092922	0.062922	0.133834	0.047188	0.051155	0.088978	0.086006
3981.08	0.050579	0.086647	0.08214	0.044474	0.109373	0.092496	0.062564	0.133847	0.047243	0.051084	0.088824	0.085918
3983.01	0.05052	0.086818	0.081979	0.044656	0.109399	0.092453	0.062729	0.133604	0.046953	0.050997	0.088703	0.086213
3984.93	0.050541	0.086991	0.082244	0.044648	0.109482	0.092547	0.062879	0.133637	0.046796	0.050905	0.088772	0.086315
3986.86	0.050874	0.086965	0.082624	0.044969	0.109452	0.092663	0.062614	0.133606	0.047296	0.051275	0.088946	0.086801
3988.79	0.050765	0.087042	0.082623	0.045096	0.109581	0.093373	0.063169	0.133996	0.048003	0.052119	0.089524	0.087312
3990.72	0.051323	0.087523	0.082752	0.044681	0.109929	0.093704	0.063536	0.134414	0.048211	0.052479	0.089919	0.087272
3992.65	0.051679	0.087806	0.083209	0.0446	0.109474	0.093436	0.063198	0.134118	0.047527	0.052026	0.089468	0.087128
3994.58	0.050859	0.087237	0.0835	0.044734	0.10921	0.093349	0.063142	0.133964	0.047161	0.051807	0.089256	0.087024
3996.51	0.050199	0.086726	0.083382	0.044138	0.109382	0.093312	0.063114	0.133624	0.047042	0.05175	0.089325	0.086878
3998.44	0.050165	0.087106	0.082925	0.044147	0.109372	0.092859	0.062947	0.133578	0.04697	0.051705	0.089503	0.086855
4000.36	0.050119	0.087984	0.082532	0.044964	0.109712	0.092813	0.062678	0.133552	0.046502	0.051649	0.08935	0.086933

## Sheet: FTIR 1º derivative
	089_1.1	089_1.2	089_1.3	089_1.4	089_2.1	089_2.2	089_2.3	089_2.4	089_3.1	089_3.2	089_3.3	089_3.4
628.794	0.001907	0.002594	0.001498	6.2e-05	0.004823	4e-05	0.0039	-3.8e-05	0.000979	0.004354	0.000831	0.008634
630.723	0.004533	0.002634	0.001392	-0.001984	0.006436	-0.000864	0.003328	0.0044	0.001073	0.003678	-0.000865	0.010484
632.652	0.006098	0.002223	-0.000276	-0.003589	0.005165	-0.001073	0.002787	0.006583	0.000193	0.00147	-0.003485	0.007481
634.58	0.005658	0.001074	-0.001004	-0.003635	0.001576	-0.000491	0.002733	0.004904	-0.000937	-0.001479	-0.004326	0.001037
636.509	0.002736	-0.000353	-0.000614	-0.001321	-0.002394	0.000537	0.003262	0.001584	-0.000697	-0.003858	-0.002847	-0.005823
638.438	-0.000721	-0.000767	0.000579	0.002134	-0.002833	0.002486	0.004298	-0.001236	0.001145	-0.002762	-0.00023	-0.00691
640.367	-0.00246	0.000278	0.000633	0.004275	-0.000638	0.001373	0.003783	-0.001277	0.001823	-0.000679	0.001266	-0.003359
642.296	-0.002168	0.000778	0.00033	0.002998	0.001818	0.00038	0.002073	0.001251	0.001032	0.000609	0.002222	0.000308
644.225	-0.001531	0.000669	-0.001495	0.000795	0.002437	-0.000959	0.000665	0.003043	0.000443	-9.6e-05	0.001304	0.001796
646.153	-0.000272	0.000115	-0.00271	-0.000723	0.001284	-0.001619	0.000765	0.001049	-0.001022	-0.00064	0.000794	0.00156
648.082	0.000617	-0.001052	-0.002077	-0.001494	-0.000176	-0.001509	0.001064	-0.001107	-0.001266	-0.001206	0.001105	0.000418
650.011	0.000525	-0.001427	-0.001185	-0.000917	-0.000647	-0.000851	0.000832	-0.001423	-0.000405	-0.001082	0.000754	-0.000893
651.94	0.000401	-0.000968	-0.000415	-0.000158	0.000332	0.000642	7.8e-05	-0.001061	0.00029	-6.1e-05	-5.7e-05	-0.000851
653.869	-1.1e-05	0.000139	0.000301	0.000441	0.001064	0.00135	0.000286	-0.00058	0.000331	0.000802	-0.000283	-0.000231
655.797	-0.000147	0.00081	0.001316	0.000959	0.001121	0.001189	0.001649	0.000293	0.000417	0.001654	0.000103	0.000319
657.726	0.000159	0.000944	0.001855	0.001287	0.000795	0.000871	0.002152	0.000868	0.000917	0.001834	0.000484	0.000975
659.655	0.001216	0.001082	0.001985	0.001305	0.000695	0.001035	0.002229	0.000972	0.001389	0.001661	0.000971	0.001527
661.584	0.001808	0.001488	0.001617	0.001396	0.000645	0.001041	0.002176	0.001255	0.001425	0.001723	0.001472	0.001586
663.513	0.000873	0.000868	0.000404	0.000971	5.5e-05	0.000258	0.000845	0.000613	0.000566	0.000539	0.00115	0.000484
665.442	-0.000146	-0.000304	-0.000717	-3e-06	-0.000518	-0.000369	-0.000333	-0.00023	-7.9e-05	-0.00082	0.000571	-0.00051
667.37	-0.001075	-0.001142	-0.00129	-0.000929	-0.000969	-0.001054	-0.000901	-0.000773	-0.000766	-0.001579	-0.000332	-0.001022
669.299	-0.00158	-0.001439	-0.001469	-0.001593	-0.001134	-0.001377	-0.001264	-0.001528	-0.001465	-0.00191	-0.001233	-0.001257
671.228	-0.0016	-0.0014	-0.001586	-0.002035	-0.001232	-0.001616	-0.001592	-0.002186	-0.001648	-0.001983	-0.001851	-0.001433
673.157	-0.001342	-0.001348	-0.001649	-0.001783	-0.001431	-0.001777	-0.001536	-0.002138	-0.001716	-0.00162	-0.001977	-0.001475
675.086	-0.001813	-0.00184	-0.001995	-0.001557	-0.002057	-0.002025	-0.001641	-0.00207	-0.002172	-0.001506	-0.001984	-0.001759
677.014	-0.002504	-0.002525	-0.002258	-0.002058	-0.002417	-0.002408	-0.002176	-0.002197	-0.002286	-0.002069	-0.002203	-0.002207
678.943	-0.00219	-0.002348	-0.001883	-0.002164	-0.001891	-0.002178	-0.002129	-0.001828	-0.001809	-0.002071	-0.001963	-0.002008
680.872	-0.001841	-0.001911	-0.001535	-0.001848	-0.001457	-0.001895	-0.001917	-0.001543	-0.001497	-0.001798	-0.001721	-0.001655
682.801	-0.00131	-0.001397	-0.001287	-0.001381	-0.001103	-0.001523	-0.001641	-0.001255	-0.000996	-0.001383	-0.001346	-0.001217
684.73	-0.000756	-0.000948	-0.001122	-0.000847	-0.00071	-0.001098	-0.001159	-0.000963	-0.000438	-0.00078	-0.000938	-0.000701
686.658	-0.000384	-0.000475	-0.00074	-0.000226	-0.000362	-0.000616	-0.000407	-0.000639	-5.4e-05	-6.5e-05	-0.000384	-4.9e-05
688.587	8e-05	9.4e-05	-8e-06	0.000292	2.2e-05	1e-05	0.000187	-0.000171	0.000303	0.000478	0.000258	0.000598
690.516	0.000734	0.000763	0.000729	0.000678	0.000457	0.000518	0.000481	0.000389	0.000741	0.000941	0.000814	0.001069
692.445	0.001284	0.00129	0.001273	0.001028	0.000746	0.000792	0.00085	0.000866	0.00119	0.00136	0.001256	0.001345
694.374	0.001502	0.001499	0.001545	0.001258	0.000829	0.000894	0.001084	0.00119	0.001611	0.001492	0.001457	0.00143
696.303	0.001425	0.001343	0.001392	0.001197	0.000808	0.000781	0.00094	0.001032	0.001599	0.001285	0.001259	0.001206
698.231	0.000895	0.00083	0.000906	0.000831	0.000515	0.000391	0.00051	0.000435	0.001008	0.00079	0.000669	0.000724
700.16	5.4e-05	8.3e-05	0.000191	0.00022	-0.000123	-0.000261	-0.000242	-0.000334	0.000161	3e-06	-7.9e-05	7.4e-05
702.089	-0.000769	-0.000744	-0.000676	-0.000546	-0.000951	-0.001102	-0.001231	-0.001156	-0.000859	-0.000916	-0.000919	-0.000707
704.018	-0.001462	-0.001422	-0.00146	-0.001368	-0.001729	-0.001968	-0.002045	-0.001799	-0.001832	-0.00174	-0.001701	-0.001463
705.947	-0.002038	-0.001949	-0.002069	-0.002041	-0.002297	-0.002606	-0.00247	-0.002275	-0.002473	-0.00242	-0.002253	-0.002054
707.875	-0.002509	-0.002429	-0.002546	-0.002534	-0.002717	-0.002951	-0.002754	-0.002732	-0.00279	-0.00284	-0.002615	-0.002452
709.804	-0.00286	-0.002896	-0.002897	-0.002913	-0.003072	-0.0031	-0.002964	-0.003147	-0.002992	-0.003021	-0.002934	-0.002741
711.733	-0.003175	-0.003353	-0.003103	-0.003177	-0.003291	-0.003251	-0.003119	-0.003378	-0.003086	-0.003126	-0.003112	-0.002896
713.662	-0.003477	-0.003696	-0.003274	-0.003325	-0.003397	-0.003444	-0.003333	-0.003567	-0.003219	-0.003272	-0.003165	-0.003029
715.591	-0.003729	-0.003922	-0.003565	-0.003532	-0.003615	-0.003701	-0.003636	-0.003794	-0.003567	-0.003522	-0.003306	-0.003312
717.52	-0.004036	-0.004178	-0.004039	-0.003933	-0.003936	-0.004041	-0.003973	-0.003991	-0.004032	-0.003898	-0.003616	-0.003662
719.448	-0.004515	-0.004559	-0.004585	-0.004503	-0.00436	-0.004424	-0.004402	-0.004352	-0.004479	-0.004391	-0.00411	-0.004082
721.377	-0.005026	-0.004978	-0.005048	-0.005077	-0.004826	-0.004823	-0.004915	-0.004781	-0.004874	-0.004855	-0.004633	-0.004513
723.306	-0.005355	-0.005264	-0.005259	-0.005335	-0.005059	-0.005038	-0.005198	-0.004992	-0.005085	-0.005183	-0.00494	-0.00473
725.235	-0.005291	-0.00521	-0.005089	-0.005193	-0.004886	-0.004889	-0.005011	-0.004849	-0.004892	-0.005097	-0.004851	-0.004574
727.164	-0.0048	-0.004726	-0.004619	-0.004671	-0.004403	-0.004361	-0.004405	-0.004356	-0.004432	-0.004542	-0.004406	-0.004144
729.092	-0.004029	-0.003985	-0.003941	-0.003902	-0.003749	-0.003632	-0.003666	-0.003621	-0.003792	-0.003738	-0.003765	-0.003511
731.021	-0.00317	-0.003119	-0.003145	-0.003044	-0.002924	-0.002845	-0.002862	-0.002781	-0.003003	-0.002885	-0.002923	-0.002695
732.95	-0.002372	-0.002259	-0.00233	-0.002231	-0.002057	-0.002091	-0.002055	-0.001993	-0.002186	-0.002087	-0.002035	-0.001916
734.879	-0.001693	-0.001638	-0.001637	-0.001586	-0.001316	-0.001493	-0.001402	-0.001334	-0.001484	-0.001443	-0.00131	-0.001284
736.808	-0.001216	-0.001318	-0.001188	-0.00119	-0.000903	-0.001124	-0.000991	-0.000974	-0.001057	-0.001125	-0.000903	-0.000898
738.737	-0.001068	-0.001224	-0.001053	-0.001135	-0.000923	-0.001061	-0.000979	-0.000977	-0.001019	-0.001054	-0.000889	-0.000858
740.665	-0.001264	-0.001351	-0.001212	-0.001325	-0.001243	-0.001285	-0.001317	-0.001268	-0.001335	-0.001235	-0.001211	-0.001162
742.594	-0.001573	-0.001609	-0.00151	-0.001569	-0.001598	-0.001617	-0.001711	-0.001644	-0.001724	-0.001644	-0.001612	-0.001574
744.523	-0.001804	-0.001763	-0.00177	-0.001698	-0.001792	-0.001855	-0.001868	-0.001831	-0.002056	-0.001977	-0.001824	-0.001815
746.452	-0.001774	-0.001694	-0.001762	-0.001623	-0.001791	-0.001858	-0.001757	-0.001769	-0.002137	-0.001972	-0.001825	-0.001808
748.381	-0.001444	-0.001438	-0.001458	-0.001369	-0.001611	-0.001638	-0.001511	-0.001585	-0.001879	-0.001707	-0.001632	-0.001561
750.309	-0.001006	-0.001013	-0.001001	-0.001002	-0.001353	-0.001286	-0.001192	-0.001314	-0.001428	-0.001281	-0.00126	-0.001118
752.238	-0.000677	-0.000647	-0.0006	-0.000674	-0.001139	-0.001002	-0.000948	-0.000975	-0.000989	-0.000833	-0.000878	-0.000715
754.167	-0.000553	-0.000504	-0.000414	-0.00046	-0.00103	-0.000905	-0.00082	-0.000692	-0.000779	-0.000661	-0.000711	-0.000567
756.096	-0.000575	-0.000473	-0.000396	-0.000357	-0.000955	-0.000871	-0.000737	-0.000531	-0.000829	-0.000727	-0.000692	-0.000559
758.025	-0.000612	-0.000458	-0.00042	-0.000343	-0.000827	-0.000743	-0.000656	-0.000427	-0.000918	-0.000755	-0.000661	-0.000579
759.954	-0.000531	-0.000418	-0.000415	-0.000338	-0.000613	-0.000566	-0.000529	-0.000372	-0.000861	-0.000722	-0.000592	-0.00059
761.882	-0.000456	-0.000449	-0.000444	-0.000433	-0.000426	-0.000457	-0.00045	-0.000381	-0.000766	-0.000751	-0.000581	-0.00058
763.811	-0.000618	-0.000745	-0.000683	-0.000721	-0.000479	-0.000496	-0.000557	-0.000548	-0.000825	-0.0009	-0.000742	-0.000684
765.74	-0.001084	-0.00129	-0.001171	-0.001151	-0.000842	-0.000826	-0.000919	-0.00096	-0.00114	-0.001265	-0.00115	-0.001049
767.669	-0.001743	-0.001896	-0.001753	-0.001691	-0.001348	-0.001344	-0.001398	-0.001495	-0.001616	-0.001707	-0.001663	-0.001523
769.598	-0.00232	-0.002322	-0.002245	-0.002172	-0.001783	-0.001761	-0.001783	-0.00194	-0.002011	-0.002024	-0.001987	-0.001886
771.526	-0.002567	-0.00246	-0.002488	-0.002411	-0.00198	-0.00194	-0.001925	-0.002067	-0.002128	-0.002093	-0.002027	-0.002007
773.455	-0.002474	-0.002356	-0.002468	-0.002405	-0.001906	-0.001944	-0.001907	-0.001939	-0.002043	-0.001963	-0.001905	-0.001896
775.384	-0.002252	-0.002199	-0.002313	-0.002275	-0.001717	-0.001836	-0.00182	-0.001747	-0.001888	-0.001817	-0.001762	-0.00175
777.313	-0.002078	-0.002104	-0.00214	-0.002087	-0.001524	-0.001647	-0.001651	-0.001587	-0.001723	-0.00172	-0.001623	-0.001655
779.242	-0.001917	-0.001919	-0.001891	-0.001844	-0.00138	-0.001432	-0.001436	-0.001419	-0.001546	-0.0016	-0.001465	-0.001519
781.17	-0.001696	-0.00161	-0.001581	-0.001588	-0.001225	-0.001181	-0.001169	-0.001201	-0.001349	-0.001381	-0.001265	-0.001288
783.099	-0.001358	-0.001215	-0.00125	-0.001246	-0.000993	-0.00087	-0.000863	-0.000954	-0.001102	-0.001084	-0.001014	-0.000991
785.028	-0.000939	-0.000819	-0.000857	-0.000838	-0.000714	-0.0006	-0.000598	-0.00066	-0.00079	-0.000682	-0.00071	-0.000647
786.957	-0.000534	-0.000468	-0.000495	-0.000472	-0.000432	-0.000437	-0.000459	-0.000433	-0.000468	-0.00029	-0.000414	-0.000341
788.886	-0.000307	-0.000269	-0.000271	-0.000268	-0.000276	-0.000393	-0.000425	-0.000367	-0.000213	-0.000118	-0.000205	-0.000216
790.815	-0.000327	-0.000315	-0.00031	-0.000321	-0.000349	-0.000464	-0.000525	-0.000465	-0.000181	-0.000213	-0.000188	-0.000275
792.743	-0.000664	-0.00062	-0.000679	-0.000684	-0.000735	-0.000785	-0.00084	-0.00076	-0.000504	-0.00057	-0.000498	-0.000555
794.672	-0.001367	-0.001259	-0.001353	-0.001355	-0.001376	-0.001409	-0.001383	-0.001297	-0.001244	-0.001222	-0.001169	-0.001153
796.601	-0.002239	-0.002103	-0.002144	-0.002153	-0.002081	-0.002105	-0.002018	-0.001961	-0.002176	-0.00203	-0.001967	-0.001893
798.53	-0.002943	-0.002827	-0.002775	-0.002802	-0.002643	-0.002606	-0.002514	-0.002463	-0.00291	-0.00269	-0.002584	-0.002468
800.459	-0.003182	-0.003118	-0.003005	-0.003042	-0.002785	-0.002699	-0.002635	-0.002605	-0.003171	-0.002931	-0.002812	-0.002681
802.387	-0.002945	-0.002959	-0.002804	-0.002821	-0.002492	-0.002369	-0.002352	-0.002335	-0.002913	-0.002724	-0.002529	-0.002485
804.316	-0.002438	-0.002498	-0.00239	-0.00231	-0.001933	-0.001821	-0.001847	-0.00179	-0.002349	-0.002246	-0.001964	-0.001978
806.245	-0.001944	-0.001982	-0.001906	-0.001802	-0.001411	-0.001344	-0.001366	-0.001287	-0.001776	-0.001702	-0.001459	-0.001452
808.174	-0.001608	-0.001605	-0.001526	-0.001479	-0.001104	-0.001041	-0.00106	-0.000994	-0.001415	-0.001321	-0.001163	-0.001138
810.103	-0.001427	-0.001404	-0.001341	-0.001344	-0.000966	-0.000938	-0.000915	-0.000898	-0.001255	-0.00117	-0.001054	-0.001019
812.032	-0.001383	-0.001339	-0.001283	-0.001323	-0.000968	-0.001003	-0.000914	-0.000913	-0.00123	-0.00113	-0.001064	-0.001
813.96	-0.001372	-0.001339	-0.001274	-0.001278	-0.001025	-0.001097	-0.000998	-0.000955	-0.001291	-0.001126	-0.001073	-0.00102
815.889	-0.001296	-0.001326	-0.001248	-0.001213	-0.001081	-0.001109	-0.001106	-0.001003	-0.001264	-0.001124	-0.001019	-0.000987
817.818	-0.001185	-0.001255	-0.001158	-0.001123	-0.001133	-0.001087	-0.001152	-0.001044	-0.001131	-0.001039	-0.000975	-0.00088
819.747	-0.001083	-0.001151	-0.001007	-0.000978	-0.001167	-0.001084	-0.001107	-0.001075	-0.000995	-0.000879	-0.000889	-0.000767
821.676	-0.001045	-0.001033	-0.000931	-0.000895	-0.001156	-0.001079	-0.001062	-0.001046	-0.000875	-0.000788	-0.000769	-0.000705
823.604	-0.001057	-0.00093	-0.000913	-0.000879	-0.001117	-0.001078	-0.001065	-0.000985	-0.000789	-0.000755	-0.000668	-0.000681
825.533	-0.001013	-0.00083	-0.000842	-0.000828	-0.00107	-0.001046	-0.001079	-0.00094	-0.000715	-0.000683	-0.00058	-0.000633
827.462	-0.000815	-0.000665	-0.000709	-0.000683	-0.000997	-0.000959	-0.001028	-0.000857	-0.000569	-0.000556	-0.000475	-0.000536
829.391	-0.00051	-0.00044	-0.000497	-0.000493	-0.000875	-0.000827	-0.00089	-0.000746	-0.000379	-0.000385	-0.000346	-0.000372
831.32	-0.000243	-0.000248	-0.000261	-0.000266	-0.000765	-0.000701	-0.000689	-0.000651	-0.000252	-0.000196	-0.000195	-0.000197
833.249	-6.8e-05	-0.000113	-8.4e-05	-5.2e-05	-0.000642	-0.000592	-0.000534	-0.000535	-0.000191	-5.2e-05	-6.2e-05	-7.6e-05
835.177	1e-05	-2.9e-05	-4e-06	3.2e-05	-0.000511	-0.000474	-0.000476	-0.000396	-0.000161	-3e-06	-2.1e-05	-1e-05
837.106	1.5e-05	4e-05	3.2e-05	5e-05	-0.000407	-0.00038	-0.000427	-0.000256	-0.00014	1.6e-05	-1e-05	3.7e-05
839.035	3.4e-05	0.000122	9.4e-05	0.000109	-0.000284	-0.000304	-0.000299	-0.000145	-4.4e-05	5.4e-05	2.9e-05	9.8e-05
840.964	0.000133	0.000242	0.000197	0.000237	-0.000143	-0.000171	-0.0001	-2.5e-05	0.000119	0.00014	0.000135	0.000187
842.893	0.000319	0.000382	0.000355	0.000386	1.1e-05	3.3e-05	8.4e-05	0.000138	0.000243	0.000296	0.000309	0.000308
844.821	0.000488	0.00051	0.000527	0.000506	0.000136	0.00022	0.000219	0.000288	0.000361	0.000459	0.000453	0.000411
846.75	0.000569	0.000586	0.000621	0.000538	0.000224	0.000284	0.000282	0.000352	0.000434	0.000523	0.000496	0.000436
848.679	0.000563	0.000564	0.000597	0.000493	0.000256	0.000253	0.000268	0.000304	0.000407	0.00048	0.000443	0.000402
850.608	0.000485	0.000519	0.000514	0.000464	0.000244	0.000202	0.000262	0.000226	0.000376	0.000416	0.000382	0.000347
852.537	0.000499	0.000554	0.000518	0.000545	0.000296	0.000249	0.000318	0.000222	0.000432	0.000446	0.000397	0.000369
854.465	0.000705	0.000716	0.00068	0.00075	0.000425	0.000439	0.000413	0.00036	0.000579	0.000602	0.000551	0.000519
856.394	0.000931	0.000891	0.000896	0.000932	0.000563	0.000632	0.00052	0.000553	0.000706	0.000725	0.000745	0.000702
858.323	0.000893	0.000861	0.000921	0.000875	0.000583	0.000684	0.000559	0.000585	0.000679	0.000651	0.000749	0.000716
860.252	0.000489	0.000479	0.000532	0.000467	0.000373	0.000469	0.00041	0.000365	0.000394	0.000354	0.000453	0.000462
862.181	-0.000248	-0.000257	-0.000221	-0.000258	-1.7e-05	3.2e-05	5.7e-05	-3.9e-05	-0.000171	-0.000133	-9.8e-05	-3e-05
864.11	-0.001135	-0.001089	-0.001096	-0.001076	-0.000435	-0.000437	-0.000371	-0.000451	-0.00081	-0.000733	-0.000708	-0.000594
866.038	-0.001818	-0.00171	-0.001765	-0.001687	-0.000734	-0.000751	-0.000707	-0.000698	-0.00131	-0.001217	-0.001134	-0.001005
867.967	-0.002101	-0.001988	-0.002027	-0.001933	-0.000831	-0.000838	-0.000819	-0.000732	-0.001516	-0.00143	-0.001248	-0.001184
869.896	-0.002018	-0.001905	-0.001908	-0.001841	-0.000708	-0.000684	-0.000698	-0.000585	-0.001395	-0.001353	-0.001112	-0.001114
871.825	-0.001657	-0.001549	-0.001559	-0.001514	-0.000442	-0.000376	-0.000407	-0.000312	-0.001045	-0.001005	-0.000821	-0.000848
873.754	-0.001134	-0.001084	-0.001094	-0.001051	-0.000139	-6.8e-05	-4.6e-05	3e-06	-0.000594	-0.000522	-0.000456	-0.000504
875.682	-0.000619	-0.00059	-0.000614	-0.000584	0.000173	0.000198	0.000246	0.000268	-0.000211	-8.6e-05	-9.4e-05	-0.000154
877.611	-0.000155	-0.000105	-0.000163	-0.000132	0.000419	0.00041	0.00043	0.00052	0.000139	0.000257	0.000258	0.000237
879.54	0.000275	0.000308	0.000292	0.000275	0.000606	0.000602	0.0006	0.000758	0.000476	0.000583	0.000592	0.0006
881.469	0.000642	0.000663	0.000731	0.000643	0.000827	0.000832	0.000805	0.000974	0.000803	0.000915	0.000897	0.000889
883.398	0.000974	0.000993	0.001094	0.00101	0.001043	0.001097	0.001057	0.001212	0.00111	0.001215	0.001174	0.001138
885.327	0.001254	0.001263	0.001327	0.001312	0.001254	0.001337	0.001357	0.001439	0.001325	0.001435	0.001385	0.00134
887.255	0.001442	0.001472	0.001446	0.001517	0.001487	0.001547	0.001591	0.001585	0.001465	0.001558	0.001484	0.001431
889.184	0.00153	0.001631	0.001489	0.001604	0.001671	0.001696	0.001712	0.001668	0.001525	0.0016	0.001518	0.001476
891.113	0.001553	0.001657	0.001501	0.001592	0.00172	0.001736	0.001746	0.001746	0.001539	0.001583	0.00151	0.001507
893.042	0.001519	0.001573	0.001485	0.001506	0.001636	0.001691	0.001715	0.001746	0.001482	0.001518	0.001464	0.001444
894.971	0.001411	0.001434	0.00142	0.001387	0.001473	0.001556	0.001597	0.001637	0.001355	0.001415	0.001406	0.001336
896.899	0.0013	0.001272	0.001322	0.001259	0.001265	0.00136	0.001408	0.001503	0.001225	0.001289	0.001313	0.001217
898.828	0.001228	0.001202	0.001265	0.001182	0.001165	0.001202	0.001231	0.001353	0.001123	0.001191	0.001194	0.001118
900.757	0.001267	0.001277	0.001324	0.001282	0.00125	0.001211	0.001188	0.001288	0.001149	0.001216	0.00117	0.001115
902.686	0.001474	0.001509	0.001516	0.001544	0.001469	0.001432	0.001379	0.001463	0.001345	0.001408	0.001302	0.001305
904.615	0.00184	0.001876	0.001827	0.001889	0.0018	0.00178	0.001728	0.001828	0.001673	0.001716	0.001569	0.00161
906.544	0.002263	0.002324	0.002209	0.002248	0.002137	0.002153	0.002122	0.002205	0.002043	0.00204	0.001916	0.001914
908.472	0.002608	0.002675	0.00256	0.002527	0.002401	0.002437	0.002421	0.002445	0.002325	0.002317	0.002216	0.002184
910.401	0.002838	0.00285	0.002791	0.002683	0.002502	0.002526	0.00251	0.002482	0.002454	0.002456	0.002365	0.002294
912.33	0.002879	0.002853	0.002827	0.002708	0.002363	0.002402	0.002408	0.002296	0.002371	0.00237	0.002295	0.002221
914.259	0.002692	0.002643	0.002636	0.002602	0.002045	0.002108	0.002139	0.001996	0.002107	0.00211	0.002046	0.002019
916.188	0.002333	0.002276	0.002285	0.002315	0.001657	0.001683	0.001727	0.001686	0.001715	0.001721	0.00167	0.001691
918.116	0.001844	0.001813	0.001837	0.00188	0.001282	0.001192	0.001279	0.001353	0.001253	0.001248	0.001245	0.001289
920.045	0.001316	0.001305	0.001334	0.001363	0.000902	0.000778	0.000872	0.000999	0.00079	0.000792	0.000839	0.000889
921.974	0.00088	0.000814	0.000853	0.000853	0.000563	0.000539	0.000564	0.000659	0.000395	0.000426	0.000492	0.000511
923.903	0.000582	0.000487	0.000491	0.000484	0.000328	0.000435	0.0004	0.000427	0.000149	0.000156	0.000229	0.000202
925.832	0.000379	0.000361	0.000292	0.000328	0.000254	0.000419	0.000385	0.000359	7.1e-05	4.4e-05	7.5e-05	6e-05
927.76	0.000272	0.000331	0.000237	0.000333	0.000334	0.000457	0.000452	0.000404	0.0001	9.2e-05	5.3e-05	8.5e-05
929.689	0.000246	0.000335	0.000284	0.000372	0.000487	0.000527	0.000541	0.000529	0.000184	0.000204	0.000133	0.000205
931.618	0.000221	0.000328	0.000324	0.000386	0.000673	0.000634	0.00067	0.00069	0.000273	0.000322	0.000262	0.000318
933.547	0.00023	0.000285	0.000308	0.000338	0.000848	0.000801	0.000814	0.000869	0.000341	0.000417	0.000382	0.000375
935.476	0.000223	0.000228	0.000259	0.00024	0.001033	0.00099	0.000975	0.001075	0.000361	0.000478	0.000471	0.000423
937.405	0.000136	0.000158	0.000173	0.000115	0.001236	0.001152	0.001184	0.001296	0.000359	0.00052	0.00054	0.000508
939.333	1.9e-05	0.000105	8.8e-05	3.3e-05	0.001455	0.001376	0.001451	0.001519	0.00044	0.000574	0.000628	0.000632
941.262	3.8e-05	0.000155	0.000115	9.7e-05	0.001735	0.001753	0.001792	0.001788	0.000636	0.000695	0.000796	0.000817
943.191	0.000339	0.000441	0.000411	0.000406	0.002207	0.002292	0.002257	0.002242	0.001001	0.001024	0.001109	0.001126
945.12	0.000978	0.00105	0.001008	0.001032	0.002926	0.002993	0.0029	0.002917	0.001594	0.001655	0.00165	0.001625
947.049	0.001968	0.00198	0.001901	0.001944	0.003791	0.003823	0.003711	0.003753	0.002396	0.002516	0.002443	0.00236
948.977	0.003132	0.003149	0.003006	0.003015	0.004721	0.004747	0.004655	0.004699	0.003368	0.003524	0.003399	0.003268
950.906	0.004325	0.004368	0.004159	0.004129	0.005673	0.005714	0.005675	0.005679	0.004449	0.004586	0.004407	0.004244
952.835	0.005443	0.005538	0.005259	0.005237	0.006674	0.006718	0.006687	0.006663	0.005534	0.005607	0.005401	0.005197
954.764	0.00644	0.006563	0.006252	0.006263	0.007665	0.00771	0.007636	0.007612	0.006515	0.006566	0.006295	0.006084
956.693	0.007303	0.00739	0.007095	0.00713	0.008467	0.008555	0.008442	0.008391	0.007337	0.007392	0.007025	0.006853
958.622	0.007923	0.007979	0.00768	0.007749	0.008964	0.009088	0.008967	0.008932	0.007906	0.007942	0.00758	0.007395
960.55	0.008285	0.008268	0.00798	0.008073	0.009106	0.009228	0.0091	0.009153	0.008173	0.008167	0.007864	0.00765
962.479	0.008386	0.008324	0.008086	0.008133	0.008962	0.009012	0.008932	0.009044	0.00821	0.008157	0.007872	0.007699
964.408	0.008316	0.008255	0.008095	0.008032	0.008673	0.008617	0.008586	0.008743	0.008077	0.008029	0.007763	0.007612
966.337	0.008212	0.008221	0.008078	0.007952	0.008403	0.008325	0.008254	0.008468	0.007916	0.00794	0.007695	0.007493
968.266	0.008275	0.008369	0.008229	0.008108	0.008308	0.008329	0.008226	0.008416	0.007936	0.008038	0.00779	0.007547
970.194	0.008816	0.008887	0.00876	0.008667	0.008562	0.008715	0.008656	0.008732	0.008315	0.008447	0.008228	0.007907
972.123	0.009967	0.009974	0.009804	0.009764	0.009379	0.009553	0.009623	0.009658	0.009204	0.009364	0.00918	0.008769
974.052	0.011823	0.011784	0.011538	0.01155	0.01082	0.01098	0.01111	0.011209	0.010797	0.011012	0.01075	0.010326
975.981	0.014306	0.014297	0.013939	0.013969	0.012833	0.01299	0.013054	0.013224	0.013084	0.01333	0.012958	0.012536
977.91	0.01686	0.016852	0.016423	0.016443	0.014889	0.015032	0.014926	0.015145	0.015579	0.015807	0.015325	0.014875
979.839	0.018392	0.018355	0.01793	0.017944	0.015982	0.016128	0.015865	0.016062	0.017211	0.017367	0.016805	0.016323
981.767	0.018158	0.018131	0.017752	0.017757	0.015464	0.015635	0.015385	0.015448	0.017085	0.017141	0.016557	0.016086
983.696	0.016533	0.016454	0.016163	0.016151	0.013651	0.013795	0.013667	0.013583	0.015447	0.015375	0.014835	0.014371
985.625	0.014516	0.014434	0.014198	0.014223	0.011673	0.011723	0.011686	0.011586	0.013346	0.013226	0.012726	0.012375
987.554	0.013249	0.01326	0.013096	0.01318	0.010568	0.010581	0.010509	0.010494	0.012045	0.011943	0.011428	0.011274
989.483	0.013307	0.013337	0.013312	0.013408	0.010728	0.010764	0.010534	0.010631	0.0121	0.012005	0.011556	0.011482
991.411	0.014096	0.014036	0.014136	0.014194	0.011505	0.011623	0.011277	0.011397	0.012989	0.012899	0.012593	0.012484
993.34	0.014561	0.014437	0.014557	0.014531	0.011883	0.012094	0.011809	0.011901	0.013652	0.013509	0.013362	0.013166
995.269	0.013983	0.013903	0.013859	0.013832	0.011376	0.011587	0.011384	0.011497	0.013296	0.013136	0.013089	0.012823
997.198	0.012223	0.012168	0.011984	0.012046	0.009917	0.010088	0.009942	0.010023	0.011799	0.011708	0.011644	0.011393
999.127	0.00968	0.009628	0.009416	0.009608	0.007812	0.008032	0.007928	0.007929	0.009438	0.009535	0.009308	0.009289
1001.06	0.007159	0.007182	0.007068	0.007307	0.005822	0.006045	0.005989	0.005956	0.007054	0.007323	0.006964	0.007082
1002.98	0.005663	0.005778	0.005729	0.005925	0.004818	0.00498	0.004952	0.004915	0.005567	0.005891	0.005681	0.005694
1004.91	0.005766	0.005927	0.005814	0.005991	0.005251	0.005336	0.005346	0.005226	0.005686	0.005804	0.00592	0.005766
1006.84	0.007248	0.007442	0.007275	0.007424	0.006835	0.006764	0.006797	0.006756	0.007302	0.007146	0.007377	0.007132
1008.77	0.008861	0.009017	0.008834	0.008957	0.008441	0.008278	0.008225	0.008381	0.009059	0.008952	0.009028	0.00885
1010.7	0.009261	0.009293	0.009273	0.00935	0.008796	0.00873	0.008635	0.008855	0.009631	0.009675	0.009514	0.009573
1012.63	0.008096	0.008034	0.008195	0.008234	0.00773	0.007694	0.007637	0.007781	0.008616	0.008629	0.008404	0.008614
1014.56	0.005946	0.006005	0.006121	0.006113	0.00585	0.005777	0.005807	0.00576	0.006519	0.006479	0.00633	0.006436
1016.49	0.003858	0.004231	0.004051	0.004116	0.003962	0.00411	0.004129	0.0039	0.004352	0.004379	0.004312	0.004369
1018.41	0.002785	0.003221	0.00282	0.003049	0.002915	0.003292	0.003144	0.002922	0.00316	0.003189	0.003209	0.003306
1020.34	0.002893	0.003138	0.002757	0.00307	0.002866	0.003304	0.003038	0.002974	0.003099	0.003128	0.003222	0.003394
1022.27	0.003688	0.00372	0.003433	0.003696	0.003582	0.003902	0.003692	0.003714	0.003689	0.003801	0.00403	0.004246
1024.2	0.004777	0.004733	0.004661	0.004727	0.0048	0.004777	0.004719	0.00484	0.004806	0.005024	0.005422	0.005478
1026.13	0.006039	0.006055	0.006086	0.005956	0.006127	0.005842	0.005813	0.006122	0.006294	0.006548	0.007176	0.00688
1028.06	0.006874	0.007109	0.007051	0.006793	0.006895	0.00675	0.006535	0.006928	0.007455	0.007755	0.00843	0.008016
1029.99	0.006173	0.00666	0.006511	0.006264	0.006218	0.006293	0.005955	0.00629	0.007163	0.007482	0.00793	0.007801
1031.92	0.003379	0.003703	0.003609	0.003362	0.003456	0.003589	0.003233	0.003464	0.004508	0.004745	0.004862	0.005088
1033.85	-0.001308	-0.001307	-0.001375	-0.001492	-0.001177	-0.001007	-0.001304	-0.001276	-0.00044	-0.000275	-0.000503	-0.000175
1035.77	-0.00639	-0.006708	-0.00686	-0.006764	-0.006135	-0.006166	-0.006196	-0.006376	-0.006098	-0.005922	-0.006458	-0.006351
1037.7	-0.009883	-0.010485	-0.010623	-0.010464	-0.009668	-0.010003	-0.009716	-0.009997	-0.010271	-0.010035	-0.01068	-0.010902
1039.63	-0.010454	-0.011047	-0.011176	-0.010939	-0.010448	-0.010924	-0.010442	-0.010737	-0.011341	-0.011191	-0.0117	-0.012018
1041.56	-0.008128	-0.008404	-0.008551	-0.008308	-0.008439	-0.008782	-0.008261	-0.008572	-0.00907	-0.009172	-0.009452	-0.009615
1043.49	-0.004058	-0.003976	-0.004102	-0.003955	-0.004815	-0.004824	-0.004425	-0.004542	-0.004751	-0.004924	-0.005017	-0.004976
1045.42	0.000559	0.000736	0.000751	0.000721	-0.000646	-0.000297	-0.000201	2.1e-05	0.000102	6.6e-05	0.000182	0.000313
1047.35	0.00461	0.004777	0.004886	0.004776	0.003334	0.003907	0.003703	0.004064	0.004506	0.004495	0.004972	0.00498
1049.28	0.007152	0.007333	0.007402	0.007204	0.00624	0.006748	0.00647	0.00677	0.007576	0.007496	0.008325	0.008114
1051.2	0.007691	0.007876	0.008035	0.007625	0.007384	0.007573	0.007462	0.007614	0.008593	0.008564	0.00962	0.009301
1053.13	0.006008	0.006318	0.006576	0.00605	0.006522	0.006404	0.00642	0.006526	0.007346	0.007401	0.0084	0.008218
1055.06	0.001932	0.002337	0.002547	0.002013	0.00314	0.003029	0.002993	0.003056	0.003592	0.003699	0.004363	0.004227
1056.99	-0.004489	-0.004183	-0.004138	-0.004482	-0.002809	-0.002847	-0.002892	-0.002929	-0.002896	-0.002615	-0.002459	-0.002627
1058.92	-0.01185	-0.011844	-0.011993	-0.012022	-0.009936	-0.009977	-0.009873	-0.01018	-0.010751	-0.010396	-0.010769	-0.010802
1060.85	-0.018018	-0.018235	-0.018621	-0.018347	-0.015978	-0.016064	-0.015804	-0.016405	-0.017404	-0.017228	-0.017864	-0.017784
1062.78	-0.020907	-0.021214	-0.021728	-0.021264	-0.018913	-0.019214	-0.018884	-0.019535	-0.020636	-0.020749	-0.021426	-0.021292
1064.71	-0.019439	-0.019805	-0.020111	-0.019701	-0.017871	-0.018461	-0.018037	-0.018608	-0.019568	-0.019838	-0.02055	-0.020218
1066.64	-0.014682	-0.014779	-0.014944	-0.014647	-0.013786	-0.014406	-0.014147	-0.01451	-0.01503	-0.015394	-0.016139	-0.015572
1068.56	-0.008966	-0.00879	-0.008928	-0.008755	-0.009047	-0.009516	-0.00953	-0.009748	-0.00942	-0.009913	-0.010559	-0.010041
1070.49	-0.004716	-0.004647	-0.004679	-0.004607	-0.005928	-0.006232	-0.006357	-0.00649	-0.005527	-0.006027	-0.006431	-0.006009
1072.42	-0.003141	-0.003416	-0.003235	-0.003226	-0.005199	-0.005293	-0.005447	-0.005579	-0.004408	-0.004743	-0.004944	-0.004524
1074.35	-0.004243	-0.004717	-0.004326	-0.004358	-0.006447	-0.006464	-0.006523	-0.006664	-0.005582	-0.005792	-0.005777	-0.005444
1076.28	-0.006814	-0.00727	-0.006857	-0.00684	-0.008668	-0.00875	-0.00863	-0.008723	-0.007877	-0.008064	-0.007916	-0.007717
1078.21	-0.009442	-0.009671	-0.009383	-0.00934	-0.010701	-0.010873	-0.010553	-0.010637	-0.010026	-0.010245	-0.010128	-0.010002
1080.14	-0.011111	-0.010971	-0.010882	-0.010829	-0.011687	-0.011903	-0.011555	-0.01161	-0.011158	-0.011457	-0.01137	-0.011265
1082.07	-0.011465	-0.011246	-0.011198	-0.011163	-0.011576	-0.011804	-0.011486	-0.011521	-0.011237	-0.011475	-0.011417	-0.011309
1083.99	-0.010958	-0.01098	-0.010807	-0.010774	-0.010875	-0.010998	-0.010746	-0.010784	-0.01082	-0.010814	-0.010694	-0.010562
1085.92	-0.010129	-0.010336	-0.010112	-0.010018	-0.009938	-0.009932	-0.009772	-0.009866	-0.010111	-0.009875	-0.00969	-0.00953
1087.85	-0.009126	-0.009253	-0.009112	-0.008983	-0.008849	-0.008835	-0.008661	-0.00875	-0.009013	-0.00877	-0.008499	-0.00838
1089.78	-0.007655	-0.007623	-0.007639	-0.00753	-0.007435	-0.007446	-0.00725	-0.007222	-0.007435	-0.007301	-0.006922	-0.006901
1091.71	-0.005605	-0.005448	-0.005499	-0.005517	-0.005539	-0.005518	-0.005366	-0.005203	-0.005333	-0.005309	-0.004921	-0.004957
1093.64	-0.003054	-0.002833	-0.002826	-0.002944	-0.003277	-0.003146	-0.003025	-0.002814	-0.002856	-0.00282	-0.002529	-0.002559
1095.57	-0.000301	-8.4e-05	-2.5e-05	-0.000204	-0.000855	-0.00067	-0.000514	-0.00029	-0.000239	-0.000108	1.5e-05	3e-06
1097.5	0.002028	0.002244	0.002313	0.002088	0.001289	0.001467	0.001595	0.001797	0.00198	0.002186	0.002164	0.00216
1099.43	0.003264	0.003519	0.003533	0.003308	0.002483	0.002599	0.002672	0.002907	0.003196	0.003411	0.003351	0.003281
1101.35	0.003217	0.003466	0.003464	0.003236	0.002504	0.002573	0.002585	0.002914	0.003207	0.003356	0.003471	0.003199
1103.28	0.002378	0.002491	0.002535	0.002338	0.001791	0.001814	0.001798	0.002149	0.002352	0.002477	0.002797	0.002388
1105.21	0.000983	0.000955	0.001053	0.0009	0.000595	0.000515	0.000518	0.000781	0.001015	0.00109	0.001443	0.001071
1107.14	-0.0015	-0.001604	-0.001499	-0.001581	-0.001672	-0.001817	-0.001806	-0.001737	-0.001314	-0.001294	-0.001041	-0.001205
1109.07	-0.005424	-0.005563	-0.005395	-0.005465	-0.005386	-0.005601	-0.005578	-0.005736	-0.005081	-0.005154	-0.005018	-0.004875
1111	-0.009985	-0.010123	-0.00987	-0.009955	-0.009799	-0.010011	-0.010066	-0.010376	-0.009561	-0.009786	-0.009692	-0.009306
1112.93	-0.013397	-0.013523	-0.013262	-0.013299	-0.013234	-0.013361	-0.013462	-0.013807	-0.013053	-0.013408	-0.01326	-0.012786
1114.86	-0.014175	-0.014304	-0.014071	-0.014016	-0.014123	-0.014217	-0.01423	-0.01456	-0.014038	-0.014399	-0.014206	-0.013756
1116.78	-0.012196	-0.012331	-0.012135	-0.012015	-0.012253	-0.01239	-0.012285	-0.012532	-0.012255	-0.012532	-0.012382	-0.011955
1118.71	-0.009072	-0.009203	-0.009037	-0.008928	-0.009163	-0.009365	-0.009187	-0.009314	-0.009134	-0.009341	-0.009249	-0.008868
1120.64	-0.00693	-0.007043	-0.006855	-0.00681	-0.006953	-0.007175	-0.007042	-0.007046	-0.006822	-0.006924	-0.00689	-0.006602
1122.57	-0.006471	-0.006557	-0.00633	-0.006341	-0.006374	-0.00657	-0.006525	-0.006461	-0.006173	-0.006243	-0.006201	-0.005971
1124.5	-0.00693	-0.006975	-0.00677	-0.006729	-0.006708	-0.006788	-0.006845	-0.006754	-0.006495	-0.006611	-0.006512	-0.006259
1126.43	-0.007239	-0.007269	-0.007106	-0.006966	-0.006965	-0.006952	-0.007001	-0.006928	-0.006834	-0.006945	-0.006781	-0.00649
1128.36	-0.006896	-0.006934	-0.006774	-0.006616	-0.006664	-0.006659	-0.006598	-0.006557	-0.006661	-0.006744	-0.00649	-0.006193
1130.29	-0.005856	-0.005848	-0.005708	-0.005595	-0.005749	-0.005771	-0.005637	-0.005587	-0.005794	-0.00587	-0.005583	-0.005323
1132.21	-0.004191	-0.004141	-0.004052	-0.003971	-0.004372	-0.004391	-0.004222	-0.004161	-0.004364	-0.004428	-0.004205	-0.003991
1134.14	-0.002041	-0.001996	-0.001942	-0.001894	-0.002638	-0.002628	-0.002517	-0.002418	-0.00252	-0.002541	-0.002433	-0.002293
1136.07	0.000459	0.000497	0.000531	0.000539	-0.000601	-0.000537	-0.000506	-0.000385	-0.000314	-0.000307	-0.0003	-0.000192
1138	0.003107	0.003119	0.003153	0.003139	0.001615	0.001721	0.001681	0.001815	0.002167	0.002153	0.002081	0.002168
1139.93	0.005461	0.005405	0.005464	0.005409	0.003622	0.003702	0.003668	0.003779	0.004467	0.004407	0.004331	0.004294
1141.86	0.006892	0.006812	0.006858	0.006765	0.004877	0.004939	0.00495	0.005001	0.005955	0.005847	0.005794	0.005664
1143.79	0.00707	0.007039	0.007004	0.00692	0.005115	0.005198	0.005184	0.005211	0.006299	0.00619	0.00609	0.005964
1145.72	0.006221	0.006189	0.006134	0.006066	0.004485	0.004584	0.00454	0.004554	0.005599	0.005561	0.0054	0.005327
1147.65	0.004696	0.004671	0.004635	0.004567	0.003366	0.003391	0.003363	0.003392	0.00427	0.004307	0.004147	0.004101
1149.57	0.002862	0.002894	0.00285	0.002806	0.002044	0.001999	0.001977	0.002034	0.002732	0.002778	0.002683	0.00265
1151.5	0.001104	0.001172	0.001121	0.001084	0.000773	0.00074	0.000713	0.000769	0.001299	0.001316	0.001351	0.001273
1153.43	-0.000352	-0.000231	-0.000271	-0.000403	-0.000194	-0.000229	-0.000186	-0.000194	0.000141	0.000135	0.000325	0.000176
1155.36	-0.001589	-0.001402	-0.00146	-0.001674	-0.000943	-0.000978	-0.000884	-0.000947	-0.000791	-0.000796	-0.000545	-0.00068
1157.29	-0.003107	-0.002929	-0.002988	-0.003221	-0.001993	-0.001992	-0.001947	-0.002005	-0.001935	-0.001922	-0.001665	-0.001767
1159.22	-0.005554	-0.005493	-0.005459	-0.005683	-0.003996	-0.004	-0.004004	-0.004068	-0.003988	-0.003944	-0.003711	-0.003759
1161.15	-0.009228	-0.009249	-0.0091	-0.009272	-0.007268	-0.007355	-0.007394	-0.007419	-0.007259	-0.007245	-0.00701	-0.006965
1163.08	-0.013516	-0.013569	-0.013295	-0.013361	-0.011369	-0.011513	-0.011607	-0.011567	-0.011303	-0.011372	-0.011073	-0.010893
1165	-0.017121	-0.017183	-0.016817	-0.01679	-0.015134	-0.015323	-0.015371	-0.015339	-0.015022	-0.015165	-0.014778	-0.014434
1166.93	-0.018905	-0.018929	-0.018556	-0.018459	-0.017358	-0.017601	-0.017506	-0.017527	-0.017221	-0.01744	-0.016973	-0.016475
1168.86	-0.018632	-0.018652	-0.018302	-0.018123	-0.017649	-0.017872	-0.017714	-0.017756	-0.01745	-0.017723	-0.017218	-0.016645
1170.79	-0.016928	-0.016962	-0.016614	-0.016442	-0.016447	-0.016554	-0.01646	-0.01647	-0.016183	-0.016449	-0.015944	-0.015382
1172.72	-0.014645	-0.014672	-0.014321	-0.014222	-0.014487	-0.014503	-0.014487	-0.014452	-0.014176	-0.014405	-0.013943	-0.013431
1174.65	-0.012344	-0.012355	-0.011998	-0.011977	-0.01237	-0.012368	-0.01237	-0.012284	-0.012001	-0.012174	-0.011771	-0.011336
1176.58	-0.010166	-0.010186	-0.009841	-0.009846	-0.010329	-0.010306	-0.010289	-0.010182	-0.00995	-0.010026	-0.00968	-0.009338
1178.51	-0.00812	-0.008152	-0.007866	-0.007877	-0.008387	-0.008361	-0.008302	-0.008222	-0.00804	-0.008032	-0.007753	-0.007516
1180.44	-0.006273	-0.006293	-0.006072	-0.006089	-0.006556	-0.006542	-0.006499	-0.006408	-0.006254	-0.006249	-0.00603	-0.005875
1182.36	-0.004723	-0.004737	-0.004548	-0.004558	-0.004935	-0.004923	-0.004952	-0.004839	-0.004722	-0.004752	-0.004582	-0.004467
1184.29	-0.003429	-0.003419	-0.003268	-0.003282	-0.003557	-0.003528	-0.003603	-0.00348	-0.003493	-0.003493	-0.003377	-0.003294
1186.22	-0.002333	-0.002298	-0.002194	-0.002216	-0.002375	-0.002347	-0.002399	-0.0023	-0.002476	-0.002436	-0.002359	-0.002303
1188.15	-0.001375	-0.001347	-0.001273	-0.001304	-0.001361	-0.001346	-0.001342	-0.001297	-0.001612	-0.001554	-0.001476	-0.001444
1190.08	-0.000505	-0.000486	-0.000437	-0.000472	-0.000449	-0.000434	-0.000407	-0.000404	-0.000823	-0.000755	-0.000676	-0.000682
1192.01	0.000287	0.000288	0.000316	0.000278	0.000396	0.000394	0.000408	0.000381	-2.8e-05	1.9e-05	5.1e-05	8e-06
1193.94	0.000956	0.000951	0.000945	0.000914	0.00111	0.001124	0.001079	0.001029	0.000699	0.00071	0.000683	0.000623
1195.87	0.001454	0.00145	0.001419	0.001379	0.001632	0.001661	0.001585	0.001481	0.001248	0.001252	0.00117	0.001091
1197.79	0.001754	0.001755	0.001704	0.001641	0.001931	0.001926	0.001871	0.001727	0.001585	0.001603	0.001472	0.001367
1199.72	0.001821	0.001832	0.001758	0.001698	0.001988	0.001924	0.001889	0.001741	0.001707	0.001696	0.001553	0.001459
1201.65	0.001585	0.001598	0.001521	0.001476	0.001716	0.001627	0.001568	0.001438	0.001529	0.001471	0.001349	0.001285
1203.58	0.000979	0.00098	0.00092	0.0009	0.001061	0.000974	0.000874	0.000751	0.000958	0.000894	0.000774	0.000752
1205.51	0.000117	9.5e-05	4.9e-05	7.4e-05	0.000171	9.6e-05	-4.9e-05	-0.00015	0.000124	7.8e-05	-4.2e-05	-3.8e-05
1207.44	-0.000681	-0.000708	-0.000736	-0.000684	-0.000617	-0.000676	-0.000821	-0.000904	-0.000666	-0.000691	-0.000759	-0.00076
1209.37	-0.001025	-0.00104	-0.00105	-0.000995	-0.000922	-0.000978	-0.001069	-0.001146	-0.001022	-0.001024	-0.001048	-0.001059
1211.3	-0.000734	-0.000714	-0.000736	-0.000684	-0.00058	-0.000616	-0.000668	-0.000703	-0.000731	-0.000699	-0.000737	-0.000745
1213.23	7.3e-05	0.000138	0.000103	0.000123	0.000271	0.000261	0.000235	0.000234	8.1e-05	0.000125	6e-05	6.3e-05
1215.15	0.001057	0.001143	0.001111	0.001095	0.001259	0.001268	0.001271	0.001245	0.001048	0.001078	0.001005	0.000994
1217.08	0.001923	0.00199	0.001961	0.001931	0.00208	0.002087	0.002094	0.002041	0.001861	0.001876	0.001795	0.001766
1219.01	0.002574	0.002588	0.002559	0.002528	0.002648	0.002643	0.002631	0.002591	0.002455	0.00244	0.002336	0.002289
1220.94	0.002998	0.002972	0.002927	0.002908	0.002978	0.002973	0.002944	0.002917	0.002806	0.002777	0.002667	0.002607
1222.87	0.003249	0.003224	0.003123	0.003125	0.003147	0.00315	0.003084	0.003084	0.002971	0.002963	0.00284	0.002794
1224.8	0.003361	0.003353	0.003208	0.003202	0.003215	0.003221	0.003152	0.003164	0.003048	0.003058	0.002921	0.002884
1226.73	0.003396	0.003384	0.003251	0.003214	0.003243	0.003226	0.003225	0.003199	0.003096	0.003107	0.002976	0.002907
1228.66	0.003367	0.003333	0.003245	0.003194	0.003227	0.00319	0.003229	0.003169	0.003095	0.003101	0.002987	0.002868
1230.58	0.003149	0.003086	0.003063	0.003001	0.003022	0.002981	0.003003	0.002951	0.002919	0.002895	0.002795	0.002674
1232.51	0.002641	0.002571	0.002589	0.002528	0.002516	0.002485	0.002492	0.002441	0.002479	0.0024	0.002322	0.002243
1234.44	0.001925	0.001869	0.00189	0.001846	0.001814	0.001782	0.001814	0.001719	0.00182	0.001709	0.001675	0.001647
1236.37	0.001218	0.001157	0.001171	0.001154	0.001125	0.001075	0.001159	0.001014	0.001149	0.001036	0.001019	0.001032
1238.3	0.000647	0.000565	0.000592	0.000591	0.000594	0.000538	0.000643	0.000485	0.00063	0.000519	0.000495	0.000515
1240.23	0.000232	0.000158	0.00019	0.000194	0.000233	0.000199	0.000248	0.000171	0.000251	0.000166	0.000142	0.000139
1242.16	-0.000138	-0.000164	-0.000136	-0.000143	-8.7e-05	-0.000104	-0.000139	-8.9e-05	-0.000125	-0.000177	-0.00016	-0.000178
1244.09	-0.00059	-0.000562	-0.000549	-0.000583	-0.000521	-0.000527	-0.000591	-0.000466	-0.000604	-0.000636	-0.000561	-0.000561
1246.02	-0.00108	-0.001025	-0.001027	-0.001077	-0.001035	-0.001023	-0.001079	-0.000916	-0.001131	-0.001125	-0.001039	-0.000992
1247.94	-0.001452	-0.001413	-0.001406	-0.001439	-0.001429	-0.001424	-0.001459	-0.001304	-0.001529	-0.001493	-0.001426	-0.001331
1249.87	-0.001595	-0.001585	-0.001562	-0.001557	-0.001601	-0.001612	-0.001609	-0.001492	-0.001684	-0.001654	-0.001576	-0.001461
1251.8	-0.001445	-0.001425	-0.0014	-0.001375	-0.001505	-0.001504	-0.00147	-0.001397	-0.001553	-0.001537	-0.001425	-0.001337
1253.73	-0.001041	-0.001009	-0.000996	-0.000971	-0.00115	-0.001147	-0.001091	-0.001056	-0.001169	-0.001167	-0.001039	-0.000996
1255.66	-0.000619	-0.000602	-0.000571	-0.000571	-0.000747	-0.000766	-0.00068	-0.00068	-0.00073	-0.000743	-0.00063	-0.000618
1257.59	-0.000346	-0.000362	-0.000292	-0.000311	-0.000485	-0.000495	-0.000426	-0.000404	-0.000427	-0.000448	-0.000363	-0.000357
1259.52	-0.000314	-0.00035	-0.000266	-0.000286	-0.000397	-0.000381	-0.000391	-0.000277	-0.000314	-0.000337	-0.000291	-0.000262
1261.45	-0.000518	-0.000534	-0.000464	-0.000479	-0.00045	-0.000423	-0.000489	-0.000299	-0.000371	-0.000397	-0.000342	-0.000304
1263.37	-0.000749	-0.000717	-0.000692	-0.000693	-0.000515	-0.000471	-0.000542	-0.000328	-0.00047	-0.000495	-0.000379	-0.000362
1265.3	-0.0008	-0.000727	-0.000741	-0.00076	-0.000421	-0.00038	-0.000413	-0.000242	-0.000444	-0.000451	-0.000327	-0.000325
1267.23	-0.000636	-0.000557	-0.000577	-0.000633	-0.000173	-0.000154	-0.000117	-1.7e-05	-0.000275	-0.000254	-0.000168	-0.000164
1269.16	-0.000276	-0.000232	-0.000198	-0.00028	0.000117	0.000141	0.000272	0.000293	-3.2e-05	2.9e-05	9.7e-05	0.000103
1271.09	0.000237	0.000224	0.000296	0.000233	0.000425	0.000471	0.000636	0.000636	0.000271	0.000358	0.000435	0.000426
1273.02	0.000791	0.000761	0.000796	0.000764	0.000785	0.000852	0.000975	0.00101	0.000662	0.000754	0.000823	0.000795
1274.95	0.00131	0.001307	0.001299	0.001301	0.001207	0.001278	0.001346	0.001406	0.001132	0.001212	0.001273	0.001219
1276.88	0.001607	0.001643	0.001603	0.001631	0.001458	0.001526	0.00154	0.0016	0.001471	0.001507	0.001553	0.001487
1278.81	0.001467	0.00152	0.001473	0.001494	0.001272	0.001311	0.001329	0.00136	0.001377	0.001392	0.001386	0.00135
1280.73	0.000939	0.000979	0.000947	0.000972	0.000712	0.000718	0.000747	0.000772	0.000864	0.000866	0.000834	0.000821
1282.66	0.000147	0.000132	0.000138	0.000175	-2.9e-05	-4.6e-05	-5.2e-05	-1.3e-05	0.000114	7.1e-05	3.3e-05	5.1e-05
1284.59	-0.000631	-0.000697	-0.000659	-0.000629	-0.000688	-0.000722	-0.000736	-0.000705	-0.000658	-0.000721	-0.000749	-0.000706
1286.52	-0.001086	-0.001154	-0.001089	-0.001094	-0.000969	-0.001002	-0.000975	-0.000991	-0.001179	-0.001214	-0.001185	-0.001133
1288.45	-0.001189	-0.001223	-0.001136	-0.001152	-0.000911	-0.000932	-0.000858	-0.000923	-0.001381	-0.001372	-0.001249	-0.001205
1290.38	-0.00109	-0.001077	-0.001011	-0.00101	-0.000741	-0.000749	-0.00068	-0.000731	-0.001354	-0.001318	-0.001154	-0.001116
1292.31	-0.000787	-0.000757	-0.00073	-0.000716	-0.000463	-0.000475	-0.000453	-0.000433	-0.001089	-0.001045	-0.000912	-0.000867
1294.24	-0.000244	-0.000218	-0.000215	-0.000203	2.5e-05	4e-06	-2.7e-05	4.7e-05	-0.000514	-0.0005	-0.00042	-0.000387
1296.16	0.000443	0.000464	0.000445	0.000452	0.000658	0.000629	0.00061	0.000657	0.000246	0.000233	0.000243	0.000256
1298.09	0.00122	0.001253	0.001201	0.001206	0.001331	0.001306	0.001374	0.001354	0.001036	0.001028	0.001005	0.00098
1300.02	0.001974	0.002027	0.001944	0.001938	0.001983	0.001992	0.002099	0.002051	0.001751	0.00177	0.001752	0.001691
1301.95	0.002557	0.002615	0.002501	0.00249	0.002543	0.002573	0.002619	0.002609	0.002344	0.00238	0.002356	0.002249
1303.88	0.002963	0.002993	0.002886	0.002848	0.002957	0.002994	0.002964	0.003013	0.002783	0.00283	0.002779	0.002637
1305.81	0.003309	0.003307	0.003231	0.003173	0.003338	0.003372	0.003318	0.003392	0.003157	0.003203	0.003134	0.002981
1307.74	0.003443	0.00344	0.003386	0.003316	0.003595	0.003598	0.003562	0.003603	0.003422	0.003419	0.00333	0.003163
1309.67	0.003162	0.003173	0.003113	0.003065	0.003372	0.003376	0.003352	0.003369	0.003221	0.003207	0.003103	0.002954
1311.59	0.002406	0.002419	0.002355	0.002341	0.00259	0.002605	0.002594	0.002598	0.002457	0.002446	0.002355	0.002276
1313.52	0.001	0.000999	0.000969	0.000941	0.00122	0.001176	0.001156	0.001148	0.001093	0.001058	0.000989	0.000989
1315.45	-0.000715	-0.000738	-0.000716	-0.000751	-0.000509	-0.000591	-0.000657	-0.000641	-0.000633	-0.000675	-0.000676	-0.000633
1317.38	-0.00198	-0.00201	-0.001941	-0.00195	-0.001912	-0.001971	-0.002008	-0.002007	-0.002072	-0.002064	-0.001958	-0.0019
1319.31	-0.002369	-0.002377	-0.002295	-0.00226	-0.002445	-0.00246	-0.002424	-0.002478	-0.002649	-0.00259	-0.002412	-0.002363
1321.24	-0.001949	-0.001942	-0.00188	-0.001807	-0.002169	-0.00213	-0.002066	-0.00214	-0.002388	-0.002288	-0.002113	-0.002068
1323.17	-0.00094	-0.000942	-0.000907	-0.000814	-0.001301	-0.001214	-0.001146	-0.001208	-0.001558	-0.001407	-0.001279	-0.001213
1325.1	0.000228	0.000225	0.00022	0.000298	-9.3e-05	-4.4e-05	1.8e-05	-3.1e-05	-0.000372	-0.000278	-0.000223	-0.00014
1327.03	0.001157	0.001161	0.001122	0.001147	0.00097	0.000949	0.00095	0.000972	0.000685	0.000694	0.000702	0.000761
1328.95	0.001925	0.00192	0.001872	0.001854	0.001766	0.001738	0.001698	0.001788	0.001468	0.001465	0.001484	0.001485
1330.88	0.002479	0.002487	0.00243	0.002423	0.002348	0.002341	0.002294	0.002399	0.002079	0.00204	0.002055	0.002022
1332.81	0.002619	0.002601	0.00251	0.002573	0.002727	0.00269	0.0026	0.002703	0.002624	0.002372	0.002262	0.002237
1334.74	0.001692	0.00158	0.001521	0.001553	0.002263	0.002058	0.001916	0.001949	0.002375	0.001903	0.001599	0.001594
1336.67	0.000227	0.000102	0.00011	6.2e-05	0.000922	0.000654	0.00056	0.00049	0.001057	0.000652	0.000367	0.00037
1338.6	-0.001064	-0.001119	-0.001075	-0.001142	-0.000669	-0.000833	-0.000787	-0.000929	-0.000664	-0.00079	-0.00085	-0.000833
1340.53	-0.001903	-0.001882	-0.001807	-0.001846	-0.001981	-0.00197	-0.001818	-0.001922	-0.002193	-0.001966	-0.001772	-0.001711
1342.46	-0.002088	-0.002015	-0.001931	-0.001884	-0.002508	-0.002354	-0.00217	-0.002174	-0.002915	-0.00247	-0.002128	-0.002002
1344.38	-0.001789	-0.001691	-0.001629	-0.001475	-0.002143	-0.001947	-0.001837	-0.00174	-0.002622	-0.002225	-0.001904	-0.001747
1346.31	-0.001182	-0.001097	-0.001081	-0.000885	-0.00115	-0.00102	-0.001034	-0.000861	-0.001562	-0.001391	-0.001221	-0.001096
1348.24	-0.000561	-0.000481	-0.000469	-0.000399	-0.000174	-0.000142	-0.000224	-8e-05	-0.000492	-0.000467	-0.000426	-0.000374
1350.17	0.000307	0.000394	0.000396	0.000353	0.000656	0.000707	0.000637	0.000729	0.000397	0.000422	0.000446	0.000437
1352.1	0.000884	0.000935	0.000922	0.000842	0.00111	0.001147	0.001113	0.001173	0.000979	0.001	0.000986	0.000959
1354.03	0.001129	0.001143	0.00113	0.001105	0.001229	0.001242	0.001254	0.001292	0.001168	0.001201	0.001166	0.001167
1355.96	0.001387	0.001348	0.001308	0.001393	0.001521	0.001475	0.001509	0.001523	0.001499	0.001431	0.001356	0.001385
1357.89	0.001033	0.000949	0.000933	0.000981	0.001432	0.001265	0.001213	0.001203	0.001534	0.00132	0.00115	0.001148
1359.82	0.00078	0.000753	0.000745	0.000744	0.001115	0.000989	0.000877	0.000888	0.001283	0.001118	0.000977	0.000937
1361.74	0.00109	0.00114	0.001085	0.001066	0.001119	0.001125	0.000999	0.00105	0.001292	0.001253	0.001211	0.001156
1363.67	0.001344	0.001419	0.001348	0.001301	0.001087	0.001157	0.001064	0.001143	0.001264	0.001348	0.001366	0.00132
1365.6	0.001669	0.00178	0.001715	0.001738	0.001083	0.001248	0.001285	0.001374	0.00121	0.001433	0.001533	0.001534
1367.53	0.002091	0.002158	0.00207	0.002201	0.001452	0.00165	0.001763	0.001842	0.001544	0.001683	0.001774	0.001858
1369.46	0.001285	0.001209	0.001175	0.001221	0.001113	0.001096	0.001127	0.001164	0.001385	0.001201	0.001133	0.001241
1371.39	-0.000267	-0.000393	-0.00034	-0.000397	-0.000146	-0.000343	-0.000383	-0.000384	0.000292	-2.3e-05	-0.000148	-7.7e-05
1373.32	-0.001296	-0.001358	-0.001286	-0.001295	-0.001325	-0.001511	-0.001505	-0.001505	-0.000903	-0.0011	-0.001143	-0.001084
1375.25	-0.001796	-0.001823	-0.001763	-0.001731	-0.002049	-0.002163	-0.002111	-0.002098	-0.001712	-0.001771	-0.001745	-0.00167
1377.17	-0.002068	-0.002076	-0.001997	-0.001974	-0.002524	-0.002524	-0.002435	-0.002437	-0.00233	-0.002218	-0.002141	-0.002043
1379.1	-0.001474	-0.001419	-0.001382	-0.001232	-0.002173	-0.001955	-0.001859	-0.001833	-0.002174	-0.001942	-0.00179	-0.001631
1381.03	-0.000764	-0.000738	-0.000779	-0.000559	-0.001184	-0.000983	-0.000982	-0.000908	-0.001209	-0.001237	-0.001148	-0.000949
1382.96	-0.00117	-0.001193	-0.001191	-0.001113	-0.000975	-0.001025	-0.001082	-0.00103	-0.000899	-0.00122	-0.001218	-0.001075
1384.89	-0.001402	-0.001384	-0.001359	-0.001352	-0.000999	-0.001153	-0.00115	-0.001124	-0.000973	-0.001282	-0.00125	-0.001167
1386.82	-0.001184	-0.001135	-0.001114	-0.00109	-0.000907	-0.001001	-0.000914	-0.000904	-0.000976	-0.001124	-0.001048	-0.000981
1388.75	-0.000672	-0.000716	-0.000681	-0.000641	-0.000538	-0.000544	-0.000485	-0.000452	-0.000736	-0.000751	-0.000686	-0.000585
1390.68	-0.000249	-0.000329	-0.000289	-0.000268	-3e-05	1.2e-05	-3.2e-05	0	-0.000292	-0.000296	-0.000297	-0.000177
1392.61	0.00035	0.000295	0.000289	0.000334	0.000766	0.000778	0.000653	0.000733	0.000537	0.000352	0.000315	0.000429
1394.53	-0.000143	-0.000231	-0.000177	-0.000301	0.000636	0.000463	0.000326	0.000406	0.000514	0.000143	9e-05	0.000135
1396.46	-0.000963	-0.000972	-0.000847	-0.001061	-0.000332	-0.00049	-0.000449	-0.000416	-0.0005	-0.00067	-0.00058	-0.000593
1398.39	-0.000845	-0.000765	-0.00068	-0.000739	-0.000726	-0.000689	-0.000455	-0.000398	-0.001094	-0.000916	-0.000675	-0.000683
1400.32	-0.000673	-0.000627	-0.000556	-0.000498	-0.000759	-0.000619	-0.000369	-0.000293	-0.001252	-0.000896	-0.000667	-0.000679
1402.25	-0.000696	-0.000719	-0.000635	-0.000574	-0.00068	-0.000558	-0.000389	-0.00034	-0.001174	-0.000857	-0.000709	-0.000742
1404.18	-0.000641	-0.000645	-0.000597	-0.000554	-0.000472	-0.000386	-0.000292	-0.000302	-0.000825	-0.000677	-0.000584	-0.000669
1406.11	-0.000487	-0.000513	-0.000482	-0.000493	-0.000206	-0.000215	-0.000183	-0.000218	-0.000373	-0.000411	-0.000383	-0.0005
1408.04	-0.000601	-0.000646	-0.000575	-0.000696	-0.000358	-0.000429	-0.000395	-0.000484	-0.000382	-0.000435	-0.000444	-0.000551
1409.96	4.7e-05	8.8e-05	6.8e-05	5.7e-05	1.2e-05	4.6e-05	0.000109	8e-06	7.9e-05	6.5e-05	7e-05	2e-05
1411.89	0.001086	0.001126	0.000936	0.00111	0.001124	0.001172	0.001096	0.001051	0.001289	0.001108	0.000998	0.001016
1413.82	0.000706	0.000651	0.000474	0.00049	0.001224	0.00106	0.000805	0.000721	0.001507	0.001184	0.000891	0.00087
1415.75	0.000218	0.000157	4.4e-05	-6.8e-05	0.000762	0.00054	0.000327	0.000198	0.001036	0.000802	0.000528	0.00046
1417.68	-4e-06	-7.2e-05	-0.000113	-0.000326	0.000394	0.000172	4.8e-05	-4.3e-05	0.000626	0.000511	0.000314	0.000195
1419.61	-0.000708	-0.000748	-0.000664	-0.001041	-0.000501	-0.000699	-0.000738	-0.000804	-0.000247	-0.000172	-0.000288	-0.000488
1421.54	-0.000789	-0.000727	-0.000625	-0.000916	-0.00111	-0.001073	-0.001002	-0.001034	-0.000869	-0.000555	-0.000475	-0.000711
1423.47	-0.00022	-8.1e-05	-0.000107	-0.000146	-0.000843	-0.000626	-0.00056	-0.000565	-0.000585	-0.000238	-0.000105	-0.000297
1425.4	-0.000122	-2.9e-05	-0.000137	-9.9e-05	-0.000544	-0.000425	-0.000481	-0.000504	-0.000201	-9e-06	-1.3e-05	-0.000139
1427.32	-0.000932	-0.000932	-0.000951	-0.001057	-0.001118	-0.001186	-0.001309	-0.00144	-0.000631	-0.000511	-0.000646	-0.000752
1429.25	-0.000494	-0.000477	-0.00055	-0.00049	-0.000924	-0.000896	-0.000965	-0.001134	-0.000281	-0.000276	-0.000382	-0.00037
1431.18	-0.000552	-0.000595	-0.000676	-0.00062	-0.000826	-0.000926	-0.00106	-0.001194	8.9e-05	-0.000257	-0.000415	-0.000311
1433.11	-0.001509	-0.001585	-0.001548	-0.001641	-0.00171	-0.001912	-0.002094	-0.002205	-0.000675	-0.001051	-0.001239	-0.001152
1435.04	-0.001595	-0.001655	-0.001579	-0.001639	-0.002135	-0.002226	-0.002345	-0.002394	-0.001256	-0.001413	-0.00148	-0.001437
1436.97	-0.001534	-0.001564	-0.001488	-0.00155	-0.002275	-0.002297	-0.002367	-0.002372	-0.00161	-0.001543	-0.001547	-0.00156
1438.9	-0.001245	-0.001197	-0.001136	-0.001178	-0.002145	-0.002063	-0.00208	-0.002056	-0.001665	-0.001387	-0.001349	-0.001395
1440.83	-0.00013	-2.3e-05	-7.3e-05	5.6e-05	-0.001093	-0.000914	-0.000882	-0.000851	-0.000746	-0.000483	-0.000434	-0.000411
1442.75	0.000627	0.000694	0.000553	0.000716	4.3e-05	9.9e-05	7.4e-05	9.9e-05	0.000412	0.000348	0.000309	0.000427
1444.68	0.000124	0.000105	3.9e-05	-4e-06	4.4e-05	-0.000128	-0.000282	-0.000254	0.000536	0.000201	9e-05	0.000169
1446.61	-0.000229	-0.000273	-0.000254	-0.000394	-0.000313	-0.00046	-0.000629	-0.000621	0.000182	-3.2e-05	-0.000124	-0.000128
1448.54	0.000368	0.000363	0.000354	0.000357	-6.3e-05	-2.5e-05	-5.8e-05	-0.000124	0.000504	0.000425	0.000387	0.000378
1450.47	0.00161	0.001631	0.001433	0.00175	0.001022	0.001143	0.001197	0.001118	0.001633	0.001378	0.001361	0.001449
1452.4	0.000582	0.000475	0.000288	0.000486	0.000863	0.000596	0.000427	0.000396	0.001374	0.000874	0.00067	0.000812
1454.33	-0.001892	-0.002086	-0.002075	-0.002215	-0.000917	-0.001495	-0.001821	-0.001833	-0.000536	-0.00103	-0.001322	-0.001214
1456.26	-0.00414	-0.004265	-0.004029	-0.004378	-0.003379	-0.003819	-0.004094	-0.004074	-0.003129	-0.003254	-0.003367	-0.003342
1458.18	-0.004614	-0.004575	-0.00428	-0.004514	-0.004734	-0.004738	-0.004797	-0.00471	-0.004649	-0.004352	-0.00413	-0.004121
1460.11	-0.004333	-0.004204	-0.003929	-0.004033	-0.004986	-0.004705	-0.004542	-0.004492	-0.004969	-0.004492	-0.004096	-0.004045
1462.04	-0.003539	-0.003401	-0.00323	-0.003138	-0.004371	-0.003948	-0.003632	-0.003676	-0.004351	-0.003956	-0.003509	-0.003416
1463.97	-0.003353	-0.00329	-0.003237	-0.003002	-0.003803	-0.003476	-0.003213	-0.0033	-0.00393	-0.003793	-0.003361	-0.00325
1465.9	-0.004666	-0.004705	-0.004609	-0.004536	-0.004236	-0.004273	-0.004234	-0.004317	-0.00469	-0.004803	-0.004523	-0.004352
1467.83	-0.006548	-0.006563	-0.006423	-0.006403	-0.005436	-0.005655	-0.005724	-0.005802	-0.006149	-0.006478	-0.006248	-0.006
1469.76	-0.007702	-0.007712	-0.007576	-0.007541	-0.006223	-0.006477	-0.006621	-0.006593	-0.00713	-0.007539	-0.007287	-0.007008
1471.69	-0.008433	-0.00847	-0.008276	-0.008386	-0.006772	-0.007034	-0.007254	-0.007076	-0.0077	-0.008	-0.007756	-0.00755
1473.62	-0.008106	-0.008114	-0.007825	-0.00809	-0.00679	-0.006863	-0.007	-0.006785	-0.007605	-0.00747	-0.007197	-0.007153
1475.54	-0.005816	-0.005752	-0.00549	-0.005692	-0.005387	-0.005137	-0.005045	-0.004864	-0.006087	-0.005465	-0.005104	-0.005198
1477.47	-0.002816	-0.002678	-0.002528	-0.002551	-0.003166	-0.002703	-0.002432	-0.002296	-0.003718	-0.002921	-0.002505	-0.002621
1479.4	-0.000433	-0.00031	-0.000283	-0.000149	-0.000953	-0.000532	-0.000251	-0.000142	-0.001338	-0.000807	-0.000477	-0.000498
1481.33	0.000246	0.000349	0.0003	0.000487	0.000259	0.000421	0.000562	0.000639	9.8e-05	0.000236	0.000322	0.000378
1483.26	0.001421	0.001507	0.001302	0.001548	0.001846	0.001762	0.001719	0.001855	0.001895	0.001626	0.001439	0.001591
1485.19	0.001776	0.001752	0.00157	0.001619	0.002551	0.002221	0.001956	0.002117	0.002819	0.002274	0.001881	0.002021
1487.12	0.00205	0.002008	0.001911	0.001833	0.002523	0.002242	0.001987	0.002104	0.002831	0.002467	0.002127	0.002178
1489.05	0.0025	0.002522	0.002474	0.002424	0.002332	0.002313	0.002207	0.002315	0.002597	0.002582	0.002463	0.002426
1490.97	0.003099	0.003164	0.003155	0.003169	0.002414	0.002644	0.002632	0.002794	0.002665	0.002847	0.002938	0.002889
1492.9	0.003726	0.003793	0.003771	0.003852	0.002934	0.003196	0.003258	0.003441	0.003158	0.003358	0.00345	0.003471
1494.83	0.004124	0.004174	0.004101	0.004148	0.003656	0.003724	0.0038	0.003941	0.003871	0.003923	0.003805	0.003884
1496.76	0.004208	0.004189	0.004126	0.004034	0.004042	0.003931	0.004025	0.004049	0.004305	0.004227	0.003906	0.003941
1498.69	0.004287	0.004294	0.004291	0.00425	0.003766	0.003819	0.004118	0.003983	0.004052	0.00418	0.003966	0.003909
1500.62	0.005615	0.005682	0.005398	0.005832	0.004922	0.005132	0.005203	0.005242	0.005267	0.005175	0.005031	0.005063
1502.55	0.006466	0.006431	0.005978	0.006319	0.006744	0.006573	0.006003	0.00625	0.007305	0.006584	0.006061	0.006094
1504.48	0.006676	0.006528	0.00609	0.006073	0.007689	0.007142	0.006186	0.006514	0.008445	0.00735	0.006507	0.006466
1506.41	0.006385	0.006231	0.005986	0.005629	0.007078	0.006514	0.005761	0.005975	0.007841	0.0071	0.006221	0.006045
1508.33	0.006575	0.006577	0.006508	0.006142	0.005933	0.005823	0.005754	0.005736	0.006584	0.006625	0.006058	0.005785
1510.26	0.007347	0.007475	0.007398	0.007376	0.005478	0.005844	0.006394	0.006218	0.006044	0.006563	0.006372	0.006167
1512.19	0.007439	0.007567	0.007479	0.007707	0.005402	0.005846	0.00661	0.0063	0.005969	0.006461	0.006399	0.00638
1514.12	0.007437	0.007424	0.007149	0.007597	0.006073	0.006301	0.006705	0.006465	0.006715	0.006591	0.00639	0.006585
1516.05	0.005613	0.005415	0.005145	0.005228	0.005672	0.005364	0.005131	0.005023	0.006292	0.005516	0.005112	0.005306
1517.98	0.003857	0.003646	0.003496	0.003408	0.004282	0.003895	0.003486	0.003471	0.004795	0.003937	0.003633	0.003789
1519.91	0.003249	0.003084	0.003046	0.002892	0.00335	0.003171	0.002798	0.002853	0.00373	0.003165	0.002947	0.003037
1521.84	0.003317	0.003226	0.003241	0.003019	0.003048	0.003076	0.002812	0.00288	0.003386	0.003169	0.002945	0.002932
1523.76	0.003532	0.003462	0.003565	0.003213	0.002968	0.003067	0.00301	0.002959	0.003352	0.003464	0.003171	0.003042
1525.69	0.004556	0.004624	0.004684	0.004525	0.003299	0.003611	0.003924	0.003651	0.003729	0.004198	0.003936	0.003776
1527.62	0.005829	0.005922	0.005676	0.005908	0.00432	0.004688	0.004995	0.004829	0.004879	0.005046	0.004945	0.004863
1529.55	0.005014	0.004958	0.004699	0.00474	0.004427	0.00436	0.004318	0.004221	0.005088	0.004776	0.004612	0.004526
1531.48	0.005121	0.005041	0.004855	0.004964	0.004486	0.004439	0.004598	0.004272	0.005244	0.005016	0.004754	0.0047
1533.41	0.006285	0.006165	0.005773	0.006278	0.005448	0.005457	0.005217	0.005249	0.006061	0.00558	0.005405	0.005541
1535.34	0.003734	0.003529	0.003257	0.003536	0.004157	0.003805	0.002779	0.00311	0.004503	0.003758	0.003515	0.003727
1537.27	0.001409	0.001228	0.00109	0.00118	0.002445	0.001957	0.000675	0.00117	0.00261	0.001823	0.001564	0.001796
1539.2	-0.001121	-0.001298	-0.001272	-0.001625	0.000337	-0.00033	-0.001378	-0.001007	0.00061	-0.000145	-0.000529	-0.000432
1541.12	-0.003429	-0.003619	-0.003283	-0.004124	-0.002288	-0.002935	-0.003186	-0.003286	-0.001878	-0.002263	-0.002588	-0.002724
1543.05	-0.002943	-0.003009	-0.00258	-0.003247	-0.003472	-0.003552	-0.002752	-0.003355	-0.003117	-0.002771	-0.002759	-0.003039
1544.98	-0.001794	-0.00172	-0.001425	-0.001506	-0.003728	-0.003216	-0.001958	-0.002636	-0.003516	-0.002833	-0.002493	-0.00271
1546.91	-0.001681	-0.001567	-0.001434	-0.001016	-0.00372	-0.002989	-0.002243	-0.002459	-0.003955	-0.003479	-0.002851	-0.002842
1548.84	-0.004503	-0.00448	-0.004247	-0.00398	-0.005042	-0.004594	-0.004459	-0.004429	-0.005917	-0.005676	-0.005077	-0.004909
1550.77	-0.005632	-0.005583	-0.005388	-0.005069	-0.005251	-0.005032	-0.00492	-0.004845	-0.006525	-0.006494	-0.005924	-0.005631
1552.7	-0.005271	-0.005323	-0.005321	-0.004903	-0.004112	-0.004256	-0.004338	-0.004056	-0.005951	-0.006191	-0.005656	-0.005159
1554.63	-0.007665	-0.007815	-0.007653	-0.007572	-0.00563	-0.006121	-0.006329	-0.005981	-0.007857	-0.008068	-0.007528	-0.007089
1556.55	-0.009187	-0.009273	-0.008965	-0.009144	-0.007011	-0.007476	-0.007631	-0.00727	-0.009246	-0.009202	-0.008592	-0.008386
1558.48	-0.009931	-0.009887	-0.009405	-0.009805	-0.008005	-0.008261	-0.008195	-0.007981	-0.010019	-0.00956	-0.008967	-0.009027
1560.41	-0.00835	-0.008142	-0.007644	-0.007915	-0.007343	-0.00717	-0.006684	-0.006715	-0.009121	-0.008242	-0.00754	-0.007756
1562.34	-0.005119	-0.00479	-0.004541	-0.004376	-0.004911	-0.004402	-0.003681	-0.003823	-0.00649	-0.005616	-0.004844	-0.005014
1564.27	-0.001824	-0.001536	-0.001499	-0.001054	-0.001749	-0.001264	-0.000706	-0.00079	-0.003135	-0.00264	-0.002016	-0.001953
1566.2	-0.000817	-0.000773	-0.000754	-0.000497	-0.000254	-0.000116	-0.000109	8.1e-05	-0.001684	-0.001559	-0.001174	-0.000936
1568.13	-0.00274	-0.002783	-0.002512	-0.002648	-0.001573	-0.001635	-0.001772	-0.001664	-0.002832	-0.002694	-0.002474	-0.002383
1570.06	-0.001323	-0.001309	-0.001183	-0.001091	-0.000495	-0.000437	-0.000476	-0.000347	-0.001789	-0.001615	-0.001319	-0.001209
1571.99	-0.00108	-0.001105	-0.001025	-0.001007	-3.1e-05	-0.000185	-0.000157	-0.000103	-0.001334	-0.001195	-0.00097	-0.000901
1573.91	-0.00106	-0.001042	-0.000986	-0.001014	-1.4e-05	-0.000208	-4.6e-05	-0.000138	-0.001175	-0.001023	-0.00084	-0.000849
1575.84	-0.000377	-0.000309	-0.000309	-0.00029	0.000362	0.000298	0.000484	0.000394	-0.000637	-0.000479	-0.000316	-0.000343
1577.77	-0.000531	-0.000497	-0.000377	-0.000545	0.000168	0.000116	0.000245	0.00016	-0.000698	-0.000461	-0.000393	-0.000446
1579.7	6.2e-05	0.00014	0.000261	0.000208	0.000367	0.000502	0.000743	0.000618	-0.000423	-6e-06	9.3e-05	-3e-06
1581.63	0.001485	0.001605	0.001571	0.001809	0.001523	0.001802	0.002049	0.00203	0.000714	0.001099	0.001233	0.001215
1583.56	0.002005	0.002055	0.001953	0.002129	0.002389	0.002483	0.00254	0.002659	0.001539	0.001705	0.001732	0.001804
1585.49	0.001646	0.001635	0.001592	0.001566	0.0024	0.002308	0.002252	0.002324	0.001651	0.001703	0.001594	0.001613
1587.42	0.002027	0.002056	0.00196	0.001988	0.002702	0.002681	0.002568	0.002623	0.002061	0.002058	0.001963	0.001924
1589.34	0.002391	0.002415	0.002292	0.002332	0.003042	0.003024	0.002858	0.002912	0.002496	0.002401	0.002323	0.00224
1591.27	0.002496	0.002505	0.002401	0.002377	0.003119	0.003041	0.002915	0.002902	0.002683	0.002581	0.002457	0.002366
1593.2	0.002588	0.002613	0.002515	0.002478	0.003019	0.002948	0.002921	0.002836	0.00269	0.002664	0.002504	0.002432
1595.13	0.002862	0.002888	0.002781	0.002771	0.003032	0.003027	0.003011	0.002955	0.002817	0.00281	0.002615	0.002609
1597.06	0.003138	0.003134	0.003026	0.002973	0.003149	0.00317	0.00306	0.003083	0.003092	0.003034	0.002794	0.002821
1598.99	0.003372	0.003358	0.003255	0.003182	0.003259	0.003258	0.003113	0.003151	0.003397	0.003294	0.003033	0.00302
1600.92	0.003805	0.003794	0.003674	0.00364	0.00353	0.00352	0.003363	0.003424	0.003841	0.003658	0.003421	0.003376
1602.85	0.00414	0.00409	0.003999	0.003928	0.003765	0.003689	0.003521	0.003566	0.004277	0.003982	0.003716	0.003653
1604.77	0.004198	0.004113	0.004074	0.003945	0.003638	0.003521	0.003418	0.003395	0.004375	0.004079	0.003737	0.003655
1606.7	0.004332	0.004218	0.004222	0.0041	0.003438	0.00337	0.003336	0.003269	0.004334	0.004119	0.003737	0.003625
1608.63	0.005125	0.005038	0.004949	0.005065	0.003828	0.003907	0.003981	0.003861	0.004747	0.004604	0.00422	0.00414
1610.56	0.006057	0.005997	0.005697	0.005994	0.004652	0.004766	0.004694	0.004677	0.005558	0.00533	0.00488	0.004917
1612.49	0.005965	0.005887	0.005614	0.005681	0.004764	0.004697	0.004364	0.004417	0.00579	0.005495	0.004894	0.004982
1614.42	0.006212	0.006158	0.005983	0.005872	0.00493	0.004808	0.004418	0.004462	0.006101	0.005803	0.005164	0.005227
1616.35	0.007104	0.007037	0.006855	0.006811	0.005563	0.005473	0.005062	0.005229	0.006835	0.00651	0.005899	0.005921
1618.28	0.007412	0.007309	0.007171	0.007036	0.005864	0.0057	0.005266	0.005467	0.007294	0.007002	0.006357	0.006287
1620.21	0.008038	0.007994	0.007792	0.007754	0.006271	0.006227	0.00592	0.006017	0.007776	0.00761	0.007014	0.006838
1622.13	0.008607	0.008679	0.008286	0.008412	0.006836	0.006941	0.006803	0.006759	0.008368	0.008224	0.007693	0.007458
1624.06	0.007596	0.00768	0.00732	0.007169	0.006369	0.006369	0.006274	0.006018	0.007989	0.007816	0.007214	0.006932
1625.99	0.006159	0.006208	0.006045	0.005621	0.005315	0.005228	0.005355	0.00471	0.006948	0.006902	0.006231	0.005878
1627.92	0.007108	0.007162	0.006848	0.00692	0.005863	0.006088	0.006383	0.005675	0.007276	0.007293	0.006706	0.006443
1629.85	0.007405	0.007219	0.006751	0.007139	0.006426	0.006697	0.006131	0.006165	0.007592	0.007305	0.00668	0.006689
1631.78	0.004974	0.004587	0.00431	0.004236	0.005129	0.00498	0.003628	0.004127	0.006465	0.005775	0.005094	0.00517
1633.71	0.003294	0.002948	0.002791	0.00243	0.003722	0.003455	0.002133	0.002644	0.005266	0.004572	0.003998	0.003969
1635.64	0.002136	0.001933	0.001893	0.001277	0.002406	0.002082	0.001388	0.001494	0.004104	0.003721	0.003275	0.00303
1637.56	0.002116	0.002124	0.002148	0.001639	0.001695	0.001502	0.00175	0.00115	0.003414	0.003529	0.00324	0.002782
1639.49	0.0053	0.005498	0.00512	0.005546	0.003285	0.003693	0.00437	0.0036	0.004787	0.005136	0.005082	0.004716
1641.42	0.00596	0.006067	0.005476	0.006201	0.004114	0.004537	0.004351	0.004398	0.005453	0.005468	0.005413	0.005386
1643.35	0.002642	0.002553	0.002336	0.002445	0.002396	0.002214	0.001182	0.001794	0.003853	0.003498	0.003226	0.003417
1645.28	0.002158	0.002102	0.002093	0.002157	0.001951	0.001691	0.00103	0.001294	0.003791	0.003448	0.003114	0.003366
1647.21	0.002085	0.00208	0.001908	0.002311	0.001415	0.001143	0.000703	0.001131	0.003289	0.002993	0.002893	0.003225
1649.14	-0.001463	-0.001377	-0.001413	-0.001322	-0.001738	-0.00228	-0.002341	-0.002045	0.000147	-9e-06	2.7e-05	0.000216
1651.07	-0.003471	-0.003279	-0.003262	-0.003328	-0.004044	-0.00441	-0.004009	-0.004015	-0.002235	-0.002067	-0.001912	-0.001872
1653	-0.004162	-0.003979	-0.003965	-0.004106	-0.005429	-0.005366	-0.004802	-0.004916	-0.003877	-0.003387	-0.003105	-0.003117
1654.92	-0.005172	-0.005071	-0.004887	-0.005207	-0.006555	-0.006327	-0.005709	-0.005917	-0.005361	-0.00464	-0.004318	-0.00435
1656.85	-0.004793	-0.004727	-0.004517	-0.004472	-0.006698	-0.006181	-0.005211	-0.005697	-0.005985	-0.005094	-0.004689	-0.004699
1658.78	-0.005227	-0.005181	-0.005132	-0.004577	-0.007131	-0.006479	-0.00561	-0.00589	-0.00698	-0.006256	-0.005689	-0.005568
1660.71	-0.009093	-0.00901	-0.008946	-0.00854	-0.009561	-0.009381	-0.009052	-0.008746	-0.009936	-0.009585	-0.008879	-0.008676
1662.64	-0.011316	-0.011115	-0.010932	-0.010774	-0.010879	-0.010879	-0.010664	-0.010362	-0.011558	-0.011258	-0.010698	-0.010441
1664.57	-0.011461	-0.011349	-0.011174	-0.011107	-0.010595	-0.010673	-0.010666	-0.010323	-0.011505	-0.011271	-0.01083	-0.010539
1666.5	-0.011601	-0.011554	-0.011339	-0.011322	-0.010504	-0.010651	-0.010686	-0.010407	-0.01143	-0.011271	-0.010802	-0.010627
1668.43	-0.010062	-0.010052	-0.009927	-0.009779	-0.00924	-0.009367	-0.009333	-0.009059	-0.01008	-0.010069	-0.009485	-0.009371
1670.35	-0.011426	-0.011479	-0.011193	-0.011421	-0.010171	-0.010506	-0.010356	-0.010181	-0.010831	-0.010919	-0.010278	-0.010304
1672.28	-0.011609	-0.011546	-0.011158	-0.011499	-0.010697	-0.010883	-0.010402	-0.010474	-0.011177	-0.011044	-0.010336	-0.010484
1674.21	-0.009262	-0.00909	-0.008849	-0.008907	-0.009166	-0.009051	-0.008452	-0.008592	-0.009632	-0.009315	-0.00865	-0.008719
1676.14	-0.007008	-0.00684	-0.006851	-0.006512	-0.007122	-0.006889	-0.006529	-0.006569	-0.007644	-0.00743	-0.006932	-0.006819
1678.07	-0.006726	-0.006765	-0.006869	-0.006454	-0.006066	-0.006102	-0.006343	-0.006078	-0.006678	-0.006852	-0.006524	-0.006298
1680	-0.008442	-0.008539	-0.008464	-0.008302	-0.00702	-0.007293	-0.007816	-0.007487	-0.007632	-0.00794	-0.007659	-0.00749
1681.93	-0.009336	-0.009431	-0.009217	-0.00932	-0.007831	-0.008128	-0.008577	-0.008276	-0.008487	-0.008704	-0.008322	-0.008232
1683.86	-0.011219	-0.011293	-0.010867	-0.011361	-0.009656	-0.009975	-0.010102	-0.010032	-0.01028	-0.010222	-0.009782	-0.009871
1685.79	-0.010859	-0.010785	-0.010299	-0.010808	-0.010072	-0.010123	-0.009728	-0.009969	-0.010706	-0.01016	-0.009638	-0.009863
1687.71	-0.008721	-0.008449	-0.008146	-0.008264	-0.008868	-0.00856	-0.007746	-0.008189	-0.009506	-0.008669	-0.008054	-0.008232
1689.64	-0.005584	-0.005302	-0.005368	-0.004887	-0.006267	-0.005765	-0.005103	-0.005297	-0.007047	-0.006402	-0.005705	-0.005625
1691.57	-0.005787	-0.005713	-0.005792	-0.005301	-0.00547	-0.005311	-0.00533	-0.005114	-0.006488	-0.006328	-0.005785	-0.005473
1693.5	-0.006789	-0.006805	-0.006798	-0.006524	-0.00543	-0.005565	-0.005973	-0.005583	-0.006466	-0.006632	-0.006265	-0.005876
1695.43	-0.007899	-0.008024	-0.007892	-0.00791	-0.005896	-0.006214	-0.006724	-0.00627	-0.006861	-0.007256	-0.006944	-0.006652
1697.36	-0.009354	-0.009494	-0.009128	-0.009476	-0.007093	-0.007466	-0.007712	-0.00748	-0.007951	-0.008262	-0.007945	-0.007873
1699.29	-0.009079	-0.00911	-0.008661	-0.009063	-0.00731	-0.007469	-0.007279	-0.007247	-0.008106	-0.008186	-0.007714	-0.007774
1701.22	-0.007442	-0.007367	-0.00698	-0.007237	-0.006404	-0.006287	-0.005724	-0.005779	-0.007131	-0.007052	-0.006431	-0.006472
1703.14	-0.0058	-0.005738	-0.005436	-0.005564	-0.005185	-0.004947	-0.00432	-0.004292	-0.006006	-0.005821	-0.00517	-0.005128
1705.07	-0.004742	-0.004685	-0.004403	-0.004442	-0.004218	-0.003898	-0.00334	-0.00324	-0.005042	-0.004702	-0.004133	-0.004047
1707	-0.002771	-0.002714	-0.00258	-0.002421	-0.002653	-0.002197	-0.001701	-0.001402	-0.003394	-0.002968	-0.002427	-0.002278
1708.93	-0.002403	-0.002371	-0.002206	-0.002085	-0.001996	-0.001693	-0.001286	-0.00083	-0.002697	-0.002383	-0.001955	-0.001762
1710.86	-0.000667	-0.000596	-0.000596	-0.000324	0.000119	0.000302	0.000442	0.001158	-0.000512	-0.00055	-0.000286	0.0001
1712.79	-0.000394	-0.000394	-0.000376	-0.000314	0.00092	0.000858	0.000697	0.001639	0.000587	0.000104	0.000238	0.000679
1714.72	-0.00123	-0.001233	-0.000997	-0.001237	-3.1e-05	-8.5e-05	-9.4e-05	0.000738	-0.000118	-0.000508	-0.000314	-1.6e-05
1716.65	-0.001324	-0.001239	-0.00091	-0.001191	-0.000949	-0.000691	-0.000323	0.000343	-0.000982	-0.000902	-0.0005	-0.000359
1718.58	-0.001118	-0.000947	-0.00059	-0.000811	-0.001542	-0.000984	-0.000305	0.000197	-0.001556	-0.001058	-0.000475	-0.000431
1720.5	-0.000375	-0.000122	0.00014	0.00011	-0.001359	-0.00063	0.000242	0.000585	-0.001376	-0.000665	4e-06	5.7e-05
1722.43	0.000671	0.00096	0.001019	0.001221	-0.000287	0.000404	0.001165	0.001484	-0.000281	0.000308	0.000868	0.001048
1724.36	0.001151	0.001367	0.001294	0.001508	0.000718	0.001143	0.001465	0.001746	0.000979	0.001193	0.001409	0.001672
1726.29	0.001228	0.001363	0.001283	0.001449	0.001135	0.001321	0.001367	0.001548	0.001789	0.001674	0.001624	0.001878
1728.22	0.001251	0.001239	0.001127	0.001181	0.001482	0.001371	0.000987	0.001178	0.002461	0.00197	0.001681	0.001883
1730.15	0.000534	0.000435	0.000422	0.000195	0.000897	0.000448	-0.000311	-0.000303	0.002119	0.001548	0.001032	0.00106
1732.08	4e-05	-2.9e-05	3e-05	-0.000303	-1.6e-05	-0.000503	-0.001231	-0.001496	0.001262	0.000935	0.000426	0.000292
1734.01	-0.000455	-0.000424	-0.000378	-0.000682	-0.001114	-0.001471	-0.001997	-0.00255	7.2e-05	5.5e-05	-0.000296	-0.000563
1735.93	-0.000903	-0.000763	-0.000759	-0.00094	-0.001981	-0.002161	-0.002468	-0.003215	-0.001015	-0.000786	-0.001005	-0.001324
1737.86	-0.001595	-0.001431	-0.001461	-0.001542	-0.002528	-0.002649	-0.002902	-0.003738	-0.001854	-0.001568	-0.001839	-0.002151
1739.79	-0.002526	-0.002392	-0.002479	-0.002445	-0.002962	-0.003085	-0.003387	-0.004176	-0.00266	-0.002501	-0.002801	-0.003069
1741.72	-0.003929	-0.003961	-0.004019	-0.004081	-0.003654	-0.003974	-0.004521	-0.005176	-0.003744	-0.003825	-0.004183	-0.004403
1743.65	-0.005538	-0.005607	-0.005568	-0.005706	-0.004692	-0.005133	-0.005698	-0.006294	-0.005192	-0.005289	-0.005626	-0.005798
1745.58	-0.006831	-0.00694	-0.006853	-0.00701	-0.005578	-0.005994	-0.006457	-0.006854	-0.006392	-0.006577	-0.00676	-0.006878
1747.51	-0.008669	-0.00877	-0.00853	-0.008848	-0.007221	-0.007558	-0.007924	-0.008257	-0.008267	-0.008376	-0.008337	-0.008507
1749.44	-0.009149	-0.009145	-0.008843	-0.009132	-0.008083	-0.008116	-0.008226	-0.00851	-0.009313	-0.00911	-0.008797	-0.008984
1751.36	-0.008797	-0.008762	-0.008469	-0.008696	-0.00796	-0.007785	-0.007782	-0.007984	-0.009271	-0.008896	-0.008483	-0.008651
1753.29	-0.007718	-0.007662	-0.007412	-0.007545	-0.007039	-0.006749	-0.006666	-0.006831	-0.008331	-0.007928	-0.007456	-0.007564
1755.22	-0.005995	-0.005974	-0.005856	-0.00588	-0.005255	-0.00504	-0.004954	-0.004996	-0.006376	-0.006238	-0.005803	-0.005773
1757.15	-0.004937	-0.005008	-0.004918	-0.004977	-0.003846	-0.003877	-0.003876	-0.003823	-0.004722	-0.004884	-0.004626	-0.004547
1759.08	-0.004255	-0.004356	-0.00421	-0.004322	-0.003229	-0.003316	-0.003265	-0.003232	-0.003968	-0.00408	-0.003901	-0.003863
1761.01	-0.00339	-0.003417	-0.003291	-0.003366	-0.002737	-0.002702	-0.002538	-0.002537	-0.003391	-0.003295	-0.003093	-0.00308
1762.94	-0.002265	-0.002224	-0.002177	-0.002185	-0.00187	-0.001746	-0.001582	-0.001547	-0.00237	-0.002236	-0.002069	-0.002055
1764.87	-0.001561	-0.001533	-0.001545	-0.001526	-0.001034	-0.000955	-0.000904	-0.000813	-0.001407	-0.00144	-0.001353	-0.001299
1766.8	-0.000982	-0.001007	-0.001037	-0.001027	-0.000214	-0.000306	-0.000432	-0.000216	-0.000552	-0.000808	-0.000763	-0.000624
1768.72	-0.000723	-0.000803	-0.00081	-0.000852	0.000143	-0.000116	-0.000378	-5.3e-05	-0.000153	-0.000536	-0.000518	-0.000358
1770.65	-0.00093	-0.001007	-0.000918	-0.001042	-0.000309	-0.000555	-0.000773	-0.000524	-0.000598	-0.000766	-0.000746	-0.000678
1772.58	-0.000945	-0.000928	-0.000809	-0.000931	-0.000844	-0.000856	-0.000823	-0.000808	-0.001116	-0.000895	-0.000841	-0.000882
1774.51	-0.000727	-0.000669	-0.000605	-0.000694	-0.00092	-0.000771	-0.000583	-0.000744	-0.001018	-0.000732	-0.000702	-0.000818
1776.44	-0.00057	-0.000491	-0.000473	-0.000529	-0.000802	-0.000615	-0.000408	-0.000674	-0.000784	-0.000577	-0.000561	-0.000713
1778.37	-0.000297	-0.000243	-0.000295	-0.000312	-0.000381	-0.000266	-0.000166	-0.00037	-0.000366	-0.000322	-0.000301	-0.000413
1780.3	-0.000284	-0.000296	-0.000332	-0.000387	-0.000174	-0.000235	-0.000356	-0.000398	-0.000222	-0.000295	-0.000298	-0.000388
1782.23	-0.000408	-0.000402	-0.000396	-0.000452	-0.000411	-0.000466	-0.000588	-0.000656	-0.000527	-0.000457	-0.000448	-0.000552
1784.15	-0.000342	-0.00031	-0.000317	-0.000328	-0.000392	-0.000379	-0.00041	-0.000578	-0.000522	-0.000392	-0.000388	-0.000447
1786.08	-0.000131	-0.000158	-0.000207	-0.000189	9.2e-05	2.7e-05	-9.2e-05	-0.000225	-1.3e-05	-8.2e-05	-0.000163	-0.000123
1788.01	-7.8e-05	-0.000185	-0.000227	-0.00023	0.000414	0.000209	-4.9e-05	-0.000114	0.000342	7.4e-05	-9e-05	-3e-06
1789.94	-0.00015	-0.000267	-0.000278	-0.000329	0.000375	0.000131	-0.000125	-0.000211	0.000314	4.5e-05	-0.000132	-0.000102
1791.87	-0.000233	-0.000312	-0.000291	-0.000385	8.9e-05	-7.9e-05	-0.000239	-0.000361	4.6e-05	-0.000102	-0.000222	-0.000279
1793.8	-0.000342	-0.000334	-0.000294	-0.000395	-0.000318	-0.000353	-0.000373	-0.000538	-0.00039	-0.000323	-0.000355	-0.000453
1795.73	-0.000334	-0.000267	-0.000245	-0.000312	-0.000458	-0.000386	-0.000289	-0.000485	-0.000509	-0.000355	-0.00034	-0.000442
1797.66	-0.000254	-0.000188	-0.000188	-0.000224	-0.000341	-0.000256	-0.000179	-0.000293	-0.000319	-0.000262	-0.00024	-0.000307
1799.59	-0.000273	-0.000236	-0.000225	-0.000249	-0.00031	-0.00027	-0.000311	-0.000291	-0.000344	-0.000297	-0.000273	-0.000308
1801.51	-0.000363	-0.000329	-0.000278	-0.000294	-0.000483	-0.000427	-0.000451	-0.000439	-0.000602	-0.000422	-0.000377	-0.000429
1803.44	-0.000333	-0.000286	-0.000246	-0.000247	-0.000471	-0.000381	-0.000344	-0.000383	-0.000606	-0.000394	-0.000328	-0.000373
1805.37	-0.000274	-0.000222	-0.000216	-0.000207	-0.00028	-0.000223	-0.000198	-0.000233	-0.0004	-0.00028	-0.000227	-0.000222
1807.3	-0.000237	-0.000207	-0.0002	-0.000212	-7.3e-05	-0.0001	-0.00012	-0.000113	-0.000164	-0.000154	-0.000151	-0.000116
1809.23	-0.000242	-0.000242	-0.000201	-0.00024	-7.3e-05	-0.000125	-0.000163	-0.000127	-0.000115	-0.000143	-0.000155	-0.000138
1811.16	-0.000284	-0.000258	-0.000205	-0.000241	-0.000268	-0.000264	-0.000275	-0.000222	-0.000321	-0.000251	-0.000229	-0.000228
1813.09	-0.000282	-0.000229	-0.000199	-0.000214	-0.000398	-0.000338	-0.000301	-0.000249	-0.000495	-0.00032	-0.00026	-0.000272
1815.02	-0.00023	-0.000183	-0.000168	-0.000172	-0.000399	-0.000303	-0.000231	-0.000201	-0.000472	-0.000299	-0.000215	-0.00024
1816.94	-0.000141	-0.000112	-0.00011	-9e-05	-0.000187	-0.000108	-5.2e-05	-4.9e-05	-0.000225	-0.000152	-6.7e-05	-8.1e-05
1818.87	-4e-05	-7.4e-05	-8.2e-05	-5.9e-05	0.000168	0.000136	0.000105	0.000127	0.00018	5.4e-05	7e-05	8.4e-05
1820.8	-4.7e-05	-0.000102	-6.8e-05	-6.9e-05	0.000233	0.000156	8.9e-05	0.000108	0.000272	8e-05	6.9e-05	9.2e-05
1822.73	-3e-06	-2.2e-05	-2.9e-05	-1.6e-05	0.000343	0.00025	0.00019	0.000198	0.000335	0.00017	0.00013	0.000183
1824.66	-2e-06	-7e-06	-4.7e-05	-5.6e-05	0.000482	0.0003	0.000149	0.000233	0.000392	0.000254	0.000139	0.000208
1826.59	-9e-05	-7.5e-05	-7.8e-05	-0.000122	0.000233	9.1e-05	-6.5e-05	4.9e-05	9.9e-05	8.7e-05	1e-05	4.1e-05
1828.52	-0.000146	-9.8e-05	-6.7e-05	-0.000115	-0.000141	-0.000138	-0.000192	-0.000106	-0.000252	-0.000123	-9.4e-05	-0.000125
1830.45	-0.000112	-5.7e-05	-1.8e-05	-4.5e-05	-0.000288	-0.000201	-0.000148	-0.000108	-0.000335	-0.000193	-9.6e-05	-0.000153
1832.38	-5.1e-05	-3.3e-05	-1e-06	-1.6e-05	-0.000298	-0.000195	-0.000106	-8.5e-05	-0.00027	-0.000205	-0.000106	-0.000155
1834.3	-5.8e-05	-3.4e-05	1e-05	1.1e-05	-0.000337	-0.000203	-8e-05	-0.00012	-0.000321	-0.000237	-0.000118	-0.000162
1836.23	4.2e-05	8.4e-05	5.7e-05	8.5e-05	-1.6e-05	7.1e-05	0.000172	8.9e-05	-5.5e-05	2e-06	4.8e-05	6.1e-05
1838.16	0.000128	0.00014	5.7e-05	6.1e-05	0.000424	0.00036	0.000309	0.000283	0.000407	0.000264	0.00019	0.000258
1840.09	0.000102	9.8e-05	3.6e-05	1.4e-05	0.000537	0.000398	0.000301	0.000287	0.000562	0.000309	0.000204	0.000259
1842.02	5.9e-05	4.7e-05	1.3e-05	-3e-05	0.000489	0.00032	0.000237	0.000236	0.000502	0.000276	0.000164	0.000185
1843.95	-3.8e-05	-5.9e-05	-2.1e-05	-8.2e-05	0.000184	6.4e-05	-1.9e-05	1e-05	0.000133	6.6e-05	1.5e-05	-1.3e-05
1845.88	-0.000152	-0.000159	-5.6e-05	-0.000107	-0.000313	-0.000269	-0.000319	-0.00027	-0.00045	-0.000256	-0.000179	-0.000263
1847.81	-0.000201	-0.000171	-4.8e-05	-7.2e-05	-0.000669	-0.000456	-0.000422	-0.000386	-0.000857	-0.000467	-0.000283	-0.000374
1849.73	-0.000115	-6.6e-05	1e-06	1.1e-05	-0.000581	-0.000348	-0.000257	-0.000236	-0.00074	-0.000386	-0.000206	-0.000247
1851.66	-2.5e-05	1.4e-05	1.9e-05	2.5e-05	-0.000238	-0.000139	-6.5e-05	-3.9e-05	-0.000341	-0.000189	-8.5e-05	-8.5e-05
1853.59	-2e-06	2.4e-05	2.5e-05	-4e-06	-2e-06	-5e-06	5.3e-05	4.6e-05	-6.1e-05	-3e-05	-2.3e-05	-1.2e-05
1855.52	3.3e-05	4.4e-05	1.9e-05	-2.2e-05	0.00014	9.9e-05	0.000103	0.0001	0.000124	9.4e-05	2.8e-05	4.2e-05
1857.45	1e-05	1.1e-05	-1.1e-05	-3.1e-05	8.3e-05	6.4e-05	5e-06	2.9e-05	8.4e-05	5.1e-05	-3e-06	9e-06
1859.38	-2.3e-05	-8e-06	-1e-05	0	-1.3e-05	1.7e-05	-2.3e-05	-2.2e-05	-2e-06	-1.4e-05	-2.2e-05	-1e-06
1861.31	3.2e-05	4.9e-05	4.1e-05	6.9e-05	0.00019	0.000169	0.000134	0.000133	0.000201	0.000112	9.5e-05	0.000149
1863.24	0.00012	0.000102	6.5e-05	7.4e-05	0.000579	0.000397	0.000269	0.000353	0.000606	0.000333	0.000264	0.000325
1865.17	0.000123	7.7e-05	4.3e-05	1e-06	0.000645	0.000393	0.000227	0.000354	0.000696	0.000367	0.000284	0.000298
1867.09	5.7e-05	1.4e-05	1.1e-05	-5.1e-05	0.000298	0.000151	5.4e-05	0.000157	0.000338	0.000169	0.000134	9.5e-05
1869.02	-4.6e-05	-4.9e-05	-2.7e-05	-5.4e-05	-0.000226	-0.000189	-0.000158	-0.00012	-0.000237	-0.000143	-7.5e-05	-0.000145
1870.95	-0.000115	-6.6e-05	-1.8e-05	-1.7e-05	-0.000622	-0.000414	-0.000248	-0.000309	-0.000692	-0.000381	-0.00022	-0.000283
1872.88	-8.1e-05	-3e-06	4.4e-05	4.9e-05	-0.000584	-0.000325	-0.00012	-0.000226	-0.000673	-0.000333	-0.000179	-0.0002
1874.81	2.4e-05	8.2e-05	9.3e-05	8.5e-05	-0.000151	-2e-05	8.5e-05	3.6e-05	-0.000236	-6e-05	-2e-06	2e-05
1876.74	6.8e-05	9.3e-05	8.8e-05	5.1e-05	0.000157	0.000147	0.000134	0.000165	0.000119	0.000109	0.000107	0.000124
1878.67	4.7e-05	6.4e-05	6.7e-05	2.3e-05	0.000158	0.000112	7.2e-05	0.00012	0.000135	9.7e-05	9.9e-05	8.1e-05
1880.6	2.7e-05	4.8e-05	4.8e-05	3.7e-05	9.2e-05	6.4e-05	3.3e-05	7.5e-05	5.9e-05	4.5e-05	7.3e-05	4.1e-05
1882.52	5.6e-05	7.2e-05	4.7e-05	6.8e-05	0.000155	0.000117	8.8e-05	0.000134	0.000131	8.7e-05	0.00011	9.9e-05
1884.45	6.9e-05	5.6e-05	3.5e-05	4e-05	0.000256	0.00017	9.7e-05	0.000179	0.000235	0.000146	0.000114	0.000148
1886.38	2.4e-05	8e-06	1.7e-05	2e-06	0.000212	0.000129	7.2e-05	0.000129	0.00017	0.000115	5.4e-05	0.000113
1888.31	-3e-06	-5e-06	2.1e-05	-4e-06	0.000148	9.7e-05	9.3e-05	8.8e-05	8.4e-05	7.4e-05	2.4e-05	7.3e-05
1890.24	-5e-06	-5e-06	3.1e-05	-1e-05	8.1e-05	6.9e-05	7.1e-05	5.3e-05	2.6e-05	2.7e-05	7e-06	1.5e-05
1892.17	-6e-06	-6e-06	2e-05	-1.4e-05	-3.6e-05	5e-06	-9e-06	-5e-06	-9.1e-05	-4.9e-05	-2.1e-05	-6.3e-05
1894.1	-1e-05	1e-06	7e-06	5e-06	-0.000147	-5.9e-05	-6.4e-05	-4.2e-05	-0.000194	-0.000116	-3.7e-05	-0.000105
1896.03	9e-06	1.8e-05	8e-06	1.7e-05	-0.000123	-5.1e-05	-5.4e-05	-8e-06	-0.000163	-0.0001	-2.3e-05	-6.6e-05
1897.95	-1.4e-05	-1.9e-05	2e-06	-2e-06	-0.000111	-8.3e-05	-9.3e-05	-4.5e-05	-0.00017	-0.000116	-5.7e-05	-6.4e-05
1899.88	-3.7e-05	-1.4e-05	2.1e-05	1.9e-05	-0.00011	-8.2e-05	-4.5e-05	-6.1e-05	-0.000183	-0.000125	-6.7e-05	-5.2e-05
1901.81	1.8e-05	5.2e-05	5.8e-05	5.1e-05	7.3e-05	6.3e-05	0.000121	6.1e-05	3.6e-05	3e-06	2.4e-05	5.5e-05
1903.74	7e-05	7.1e-05	6.4e-05	3.7e-05	0.000237	0.000176	0.000188	0.000144	0.000276	0.000116	9.5e-05	0.000125
1905.67	6.4e-05	4.9e-05	3.9e-05	7e-06	0.000216	0.000163	0.000118	0.000125	0.000286	0.00011	0.000102	0.000107
1907.6	3.2e-05	1.1e-05	7e-06	-1.4e-05	8.1e-05	5.9e-05	-1.3e-05	4.6e-05	0.000123	3.5e-05	5.8e-05	3.3e-05
1909.53	4e-06	0	6e-06	5e-06	-6e-05	-3.6e-05	-8.8e-05	-2.4e-05	-8.4e-05	-3.6e-05	1.7e-05	-1.9e-05
1911.46	2.1e-05	3.4e-05	2.9e-05	4.9e-05	-7e-06	1.3e-05	-3.5e-05	2.2e-05	-0.000108	1.6e-05	3.6e-05	1.6e-05
1913.39	7e-06	4.2e-05	3.2e-05	4.5e-05	8.3e-05	5.9e-05	2.4e-05	6.6e-05	-3.6e-05	7.5e-05	4.3e-05	4.8e-05
1915.31	5.7e-05	8e-05	5e-05	5.8e-05	0.000236	0.000173	0.000174	0.000177	0.000186	0.00018	0.00012	0.000136
1917.24	0.00011	9e-05	5.6e-05	3.9e-05	0.000416	0.0003	0.000248	0.000259	0.00046	0.00029	0.000195	0.000202
1919.17	6.2e-05	4.7e-05	5e-05	0	0.000271	0.000181	0.000129	0.00014	0.000322	0.000182	0.000132	0.000117
1921.1	2.7e-05	4.1e-05	6.6e-05	1.3e-05	-1.2e-05	-1.5e-05	9e-06	9e-06	-7e-06	2e-06	3.7e-05	1e-05
1923.03	1.6e-05	6.1e-05	8.4e-05	4.3e-05	-0.0002	-0.000112	-4.5e-05	-3.6e-05	-0.000236	-0.000106	-2.3e-05	-4e-05
1924.96	1.6e-05	7.3e-05	7.5e-05	5.9e-05	-0.000228	-0.000107	-5.2e-05	-1.4e-05	-0.000292	-0.00013	-4.3e-05	-4.7e-05
1926.89	3e-06	6.5e-05	4.6e-05	6.8e-05	-0.000201	-9.9e-05	-6.5e-05	-7e-06	-0.000245	-0.000128	-3.7e-05	-4.7e-05
1928.82	5.7e-05	9.8e-05	5.5e-05	9.7e-05	-1.5e-05	2.9e-05	3.6e-05	8.9e-05	-2.8e-05	-1e-06	5e-05	4.3e-05
1930.74	8.7e-05	8.6e-05	6.2e-05	8.6e-05	0.000167	0.000125	9.5e-05	0.000138	0.000152	0.000116	9.9e-05	9.8e-05
1932.67	4.4e-05	3.9e-05	6.2e-05	7.3e-05	8.3e-05	4.5e-05	5.8e-05	5.5e-05	1.8e-05	5.2e-05	5.1e-05	4.2e-05
1934.6	5.8e-05	6.6e-05	8.5e-05	0.000101	7.4e-05	7.4e-05	0.000133	9.4e-05	-3e-06	6.2e-05	8.3e-05	7.7e-05
1936.53	0.000103	0.000109	9.2e-05	0.000103	0.000245	0.000218	0.000247	0.000224	0.000248	0.000179	0.000166	0.000189
1938.46	9.9e-05	0.000105	7.3e-05	6.9e-05	0.000361	0.000279	0.000243	0.000248	0.000408	0.000229	0.000193	0.000214
1940.39	7e-05	6.3e-05	4.3e-05	1.4e-05	0.000328	0.000221	0.00014	0.000185	0.00035	0.000179	0.000138	0.000157
1942.32	1.5e-05	-4e-06	2.7e-05	-4.1e-05	0.000127	5.5e-05	-2.5e-05	4.8e-05	7.6e-05	2.8e-05	1.2e-05	3.8e-05
1944.25	-2.9e-05	-5.3e-05	2.2e-05	-4.8e-05	-0.000129	-0.000121	-0.000161	-9.8e-05	-0.000251	-0.000144	-0.000103	-9.7e-05
1946.18	-4.6e-05	-5.1e-05	2.4e-05	-1.8e-05	-0.000288	-0.000202	-0.000191	-0.000166	-0.000452	-0.000233	-0.000146	-0.000156
1948.1	0	2.1e-05	4.6e-05	3.6e-05	-0.000199	-0.000102	-5.7e-05	-6.4e-05	-0.000314	-0.00014	-6.3e-05	-7.2e-05
1950.03	4.7e-05	7.6e-05	5.1e-05	4.6e-05	1e-05	3.6e-05	6.9e-05	6.2e-05	-2.2e-05	1e-06	3.2e-05	1.5e-05
1951.96	3.8e-05	5.9e-05	4e-05	3.2e-05	6.8e-05	6.3e-05	7.9e-05	6e-05	4.2e-05	3.2e-05	4e-05	7e-06
1953.89	3.3e-05	3.4e-05	3.5e-05	3.5e-05	6.2e-05	6.7e-05	7.3e-05	5.7e-05	3.4e-05	3.5e-05	3.6e-05	1.6e-05
1955.82	2.5e-05	1.6e-05	2.4e-05	3.8e-05	2.6e-05	4.2e-05	2.6e-05	3.2e-05	1.7e-05	1e-05	2.5e-05	2.1e-05
1957.75	2.2e-05	1.2e-05	1.9e-05	4.8e-05	-3.1e-05	0	-2.1e-05	1e-06	-2.5e-05	-2.9e-05	1.4e-05	2e-05
1959.68	4.9e-05	4.9e-05	4.8e-05	7e-05	3.7e-05	5.1e-05	3.6e-05	7.3e-05	5.5e-05	2.8e-05	6.3e-05	8.1e-05
1961.61	8.5e-05	9.2e-05	8.2e-05	6.5e-05	0.000223	0.000176	0.000138	0.000198	0.000284	0.00015	0.000135	0.000152
1963.53	8.2e-05	8.3e-05	8.9e-05	3.1e-05	0.000276	0.000196	0.000162	0.000207	0.000333	0.000174	0.000126	0.000136
1965.46	5.7e-05	5.7e-05	6.9e-05	1.9e-05	0.000168	0.000122	0.000114	0.000134	0.000173	0.000116	7.1e-05	6.8e-05
1967.39	2.2e-05	5e-05	3.8e-05	1.7e-05	9e-06	2.6e-05	4.2e-05	5.9e-05	-1.6e-05	3e-05	2.4e-05	1.6e-05
1969.32	2e-06	6.3e-05	2.5e-05	2e-05	-0.000119	-5.4e-05	-2.6e-05	2e-06	-0.000158	-5e-05	3e-06	-1e-05
1971.25	-1e-06	7.5e-05	5.1e-05	4e-05	-0.000136	-6.5e-05	-4.3e-05	-1e-05	-0.000183	-6.8e-05	1.8e-05	6e-06
1973.18	3.3e-05	8.8e-05	8.8e-05	5.5e-05	1.8e-05	3.2e-05	3.9e-05	5.9e-05	-2.7e-05	1.8e-05	7.5e-05	6.7e-05
1975.11	6e-05	7.3e-05	8.8e-05	4.5e-05	0.000139	0.0001	8.9e-05	8.8e-05	0.000104	7.9e-05	9.3e-05	9.7e-05
1977.04	6.9e-05	4.4e-05	7.6e-05	4.2e-05	0.000116	7.4e-05	6.7e-05	5.6e-05	7e-05	7.4e-05	7e-05	7.6e-05
1978.97	7.4e-05	3.4e-05	6.9e-05	5.6e-05	7.9e-05	5.4e-05	4.8e-05	6.1e-05	2.8e-05	6.4e-05	5.9e-05	6.2e-05
1980.89	7.8e-05	5e-05	7.3e-05	7.3e-05	8.5e-05	8.2e-05	5.6e-05	8.9e-05	5.5e-05	6.9e-05	6.8e-05	6.6e-05
1982.82	7.7e-05	6.5e-05	8.4e-05	8.1e-05	0.000121	0.000121	7.3e-05	0.000116	0.000124	9.1e-05	9e-05	7.4e-05
1984.75	8.3e-05	8.8e-05	8.8e-05	9.4e-05	0.000209	0.000185	0.000143	0.000176	0.00022	0.000144	0.000132	0.00012
1986.68	9.4e-05	9.9e-05	7e-05	7.6e-05	0.00032	0.000247	0.000212	0.000224	0.000322	0.000219	0.000169	0.000161
1988.61	6.1e-05	7.4e-05	4e-05	3.4e-05	0.00026	0.000187	0.000149	0.000157	0.000239	0.000172	0.000122	0.00011
1990.54	1.9e-05	5.2e-05	2.9e-05	-3e-06	8e-05	5.6e-05	2.6e-05	4.3e-05	1.9e-05	3e-05	3.5e-05	1.5e-05
1992.47	-7e-06	3.4e-05	2.8e-05	-1e-05	-9.5e-05	-5.9e-05	-6.2e-05	-4.3e-05	-0.000186	-0.000108	-4.5e-05	-6.3e-05
1994.4	-5e-06	2.4e-05	3.4e-05	1.7e-05	-0.000177	-0.000105	-8.3e-05	-6.8e-05	-0.00026	-0.000174	-8.3e-05	-8.5e-05
1996.32	1.2e-05	1.8e-05	5.5e-05	4.4e-05	-0.000158	-9.3e-05	-4.9e-05	-3.8e-05	-0.000216	-0.000161	-7.2e-05	-5.2e-05
1998.25	5.2e-05	3.2e-05	7e-05	7.1e-05	-4.5e-05	-2.2e-05	3.4e-05	4e-05	-8.8e-05	-7.3e-05	-2.1e-05	1.1e-05
2000.18	6.7e-05	3.5e-05	6.6e-05	5.8e-05	6.3e-05	3.5e-05	5.8e-05	7e-05	2.2e-05	1.8e-05	1.3e-05	3.5e-05
2002.11	5e-05	4.3e-05	5.9e-05	3.9e-05	6.6e-05	4.6e-05	3.4e-05	5e-05	1.7e-05	4e-05	1.2e-05	2.3e-05
2004.04	5.5e-05	7e-05	5.5e-05	4.2e-05	7.2e-05	7.2e-05	4.6e-05	6.1e-05	2.8e-05	6.4e-05	4.1e-05	4.3e-05
2005.97	6.2e-05	7.1e-05	5e-05	5.6e-05	7.7e-05	7.2e-05	6.3e-05	7.1e-05	5.6e-05	8e-05	6.8e-05	6.2e-05
2007.9	6.5e-05	7.1e-05	6.1e-05	7.6e-05	5.6e-05	6e-05	7.5e-05	6.9e-05	5.7e-05	5.5e-05	8.4e-05	6.8e-05
2009.83	9.5e-05	0.000104	9.4e-05	0.000103	8.7e-05	9.9e-05	0.000112	0.000116	0.000124	7.6e-05	0.000122	0.000115
2011.76	0.000136	0.000138	0.000116	0.000113	0.000201	0.000177	0.000168	0.000192	0.000266	0.000159	0.000168	0.000167
2013.68	0.000134	0.00014	0.000121	9.3e-05	0.000275	0.000217	0.000178	0.000206	0.000314	0.000204	0.000176	0.000167
2015.61	0.000111	0.00013	0.000131	7.1e-05	0.000246	0.000196	0.000148	0.000173	0.000239	0.000183	0.000145	0.000138
2017.54	9.2e-05	0.000113	0.000136	6.4e-05	0.000147	0.000114	9.8e-05	0.000115	9.3e-05	0.000119	0.000104	9.3e-05
2019.47	7.7e-05	0.0001	0.000135	7.7e-05	3.9e-05	2.8e-05	5.3e-05	6.1e-05	-4.2e-05	5.3e-05	7.1e-05	5.3e-05
2021.4	7.7e-05	0.000105	0.000126	0.0001	-1.4e-05	1.4e-05	4.6e-05	6e-05	-6.7e-05	1.7e-05	6.4e-05	4.7e-05
2023.33	0.000104	0.000126	0.000101	0.000107	2.8e-05	6.7e-05	7.7e-05	0.000103	2.5e-05	5e-05	8.4e-05	8.2e-05
2025.26	0.000112	0.000116	7.5e-05	9.3e-05	9.2e-05	0.000105	9.6e-05	0.000115	0.000112	8.3e-05	8.8e-05	0.0001
2027.19	9.6e-05	9.7e-05	7.4e-05	8.6e-05	8.4e-05	9.1e-05	8e-05	9.3e-05	9.4e-05	6.2e-05	7.7e-05	9.2e-05
2029.11	8.9e-05	0.000105	9.3e-05	9e-05	7e-05	7.3e-05	6.9e-05	9.2e-05	6.3e-05	5.6e-05	7.4e-05	8.5e-05
2031.04	7.6e-05	0.000103	0.000106	9.6e-05	7e-05	5.6e-05	6.7e-05	9.1e-05	5.1e-05	5.8e-05	7.4e-05	6.5e-05
2032.97	7e-05	9.7e-05	0.000109	9.2e-05	7.3e-05	5.9e-05	6.5e-05	8.2e-05	3.9e-05	5.8e-05	7.5e-05	5.2e-05
2034.9	8.7e-05	9.8e-05	9.7e-05	7.4e-05	0.000116	0.000107	7.9e-05	9.9e-05	7.7e-05	8.1e-05	8.7e-05	7e-05
2036.83	9.3e-05	8.5e-05	7.7e-05	5.5e-05	0.000146	0.000132	7.9e-05	9.8e-05	0.0001	9.2e-05	8.5e-05	8.3e-05
2038.76	8.4e-05	5e-05	5.7e-05	5.2e-05	0.000125	0.000102	5.3e-05	7.5e-05	8.1e-05	5.6e-05	5.4e-05	7.1e-05
2040.69	7e-05	2.6e-05	4.6e-05	5.6e-05	6.4e-05	3.1e-05	1.7e-05	3.9e-05	2.4e-05	3e-06	2.6e-05	4.2e-05
2042.62	4.1e-05	2.2e-05	4.1e-05	4.4e-05	-7e-06	-3.4e-05	-1.3e-05	0	-5.3e-05	-3.8e-05	0	1e-06
2044.54	7e-06	1.1e-05	3.7e-05	2e-05	-5.2e-05	-5e-05	-1.5e-05	-2.2e-05	-9.7e-05	-5.5e-05	-2.3e-05	-3e-05
2046.47	-5e-06	1.9e-05	2.9e-05	2e-06	-5.3e-05	-1.7e-05	-4e-06	-1.9e-05	-9.2e-05	-4e-05	-1.7e-05	-3.2e-05
2048.4	4e-06	4.1e-05	3e-05	1.1e-05	-3e-06	3.2e-05	1.7e-05	1.3e-05	-3.1e-05	-4e-06	6e-06	-1.2e-05
2050.33	7e-06	5e-05	3.8e-05	3.1e-05	2.3e-05	3.9e-05	2.8e-05	2.9e-05	5e-06	2e-06	1.2e-05	-5e-06
2052.26	2.9e-05	4.3e-05	3.7e-05	4.1e-05	3e-05	2.7e-05	2.7e-05	4.1e-05	2e-05	-1e-06	1.4e-05	9e-06
2054.19	5.3e-05	3.7e-05	4e-05	3e-05	4.9e-05	2.6e-05	2e-05	5.4e-05	4.9e-05	2.2e-05	2.7e-05	2.8e-05
2056.12	4.5e-05	2.5e-05	4.4e-05	3e-06	5.1e-05	3.1e-05	2e-06	6.1e-05	5.5e-05	3.5e-05	3e-05	3e-05
2058.05	4.3e-05	1.6e-05	4.7e-05	0	8.8e-05	7.1e-05	3.7e-05	0.000102	9.7e-05	7.6e-05	5.7e-05	6.1e-05
2059.98	4.3e-05	2.6e-05	4.6e-05	2.4e-05	0.000134	0.000103	7.6e-05	0.00013	0.00016	0.000124	0.000103	0.000101
2061.9	3.8e-05	4e-05	4.2e-05	5.3e-05	0.00014	8.5e-05	7.8e-05	0.000109	0.000149	0.000108	0.000108	0.000102
2063.83	2.8e-05	5.1e-05	3.9e-05	6.2e-05	9.5e-05	4.9e-05	5.5e-05	6.3e-05	7.5e-05	4.6e-05	7.4e-05	7.9e-05
2065.76	2e-05	6.1e-05	4.1e-05	4.7e-05	3.1e-05	1.8e-05	2e-05	2.4e-05	2e-06	-5e-06	2.9e-05	4.7e-05
2067.69	1.5e-05	5.5e-05	4.5e-05	2.7e-05	-7e-06	0	1.4e-05	1.3e-05	-3e-05	-2.2e-05	-1e-06	1e-05
2069.62	3e-06	3.8e-05	3.8e-05	8e-06	-1.3e-05	8e-06	2.8e-05	2.6e-05	-4e-05	-1.1e-05	-1e-06	7e-06
2071.55	8e-06	3.3e-05	3e-05	-5e-06	2.6e-05	4.8e-05	5.7e-05	5.5e-05	1.8e-05	3.8e-05	3.3e-05	3.5e-05
2073.48	2e-06	2.2e-05	1e-05	-2e-05	4e-05	4.6e-05	3.3e-05	4.6e-05	5.5e-05	5e-05	4.7e-05	2.9e-05
2075.41	1e-05	1.9e-05	9e-06	-2.4e-05	2.5e-05	1.8e-05	-3e-06	2.1e-05	9e-06	1.4e-05	3.7e-05	2e-06
2077.33	2.3e-05	2e-05	2.9e-05	-7e-06	1.5e-05	9e-06	-9e-06	1.3e-05	-2.5e-05	-7e-06	2.8e-05	-1.5e-05
2079.26	2.7e-05	2.2e-05	4.6e-05	2e-05	1e-05	-4e-06	1.1e-05	2.8e-05	-2.5e-05	-1.9e-05	1.6e-05	-1.8e-05
2081.19	2.8e-05	1.9e-05	4.7e-05	4e-05	1.7e-05	-4e-06	3.8e-05	3.9e-05	-1.7e-05	-2.6e-05	8e-06	-3e-06
2083.12	2.1e-05	2.5e-05	2.9e-05	3.8e-05	3.8e-05	2.9e-05	5e-05	3.8e-05	1e-06	-5e-06	4e-06	2.2e-05
2085.05	1.1e-05	2.6e-05	5e-06	1.2e-05	5.7e-05	6e-05	3.6e-05	2.5e-05	2.5e-05	1.3e-05	-6e-06	2.5e-05
2086.98	-6e-06	3e-06	-2.5e-05	-1.8e-05	4.3e-05	4.4e-05	7e-06	0	-2e-06	-5e-06	-1.9e-05	0
2088.91	-1.4e-05	-1.7e-05	-2.3e-05	-2.3e-05	1.3e-05	6e-06	-1.1e-05	-1.9e-05	-5.4e-05	-3.2e-05	-3e-05	-1.8e-05
2090.84	-1.4e-05	-2.1e-05	-1e-06	-1.5e-05	-1.9e-05	-2.9e-05	-2.3e-05	-3.2e-05	-7.3e-05	-6.1e-05	-4.2e-05	-2e-05
2092.77	4e-06	5e-06	2.2e-05	0	-2.8e-05	-5.1e-05	-1.2e-05	-1.9e-05	-5.8e-05	-6.3e-05	-2.5e-05	-1e-06
2094.69	2e-05	3.4e-05	3.7e-05	7e-06	-1e-05	-3.3e-05	1.1e-05	-3e-06	-2.8e-05	-3.2e-05	9e-06	1.8e-05
2096.62	3.2e-05	4.7e-05	3.3e-05	6e-06	2.2e-05	1.4e-05	3e-05	1.3e-05	1.1e-05	2.2e-05	2.9e-05	2.6e-05
2098.55	1.9e-05	3.9e-05	1.2e-05	-9e-06	3.7e-05	3.1e-05	2.9e-05	1.8e-05	2e-05	4.7e-05	2.2e-05	2.6e-05
2100.48	2e-06	2.5e-05	-5e-06	-1.4e-05	2.7e-05	1.4e-05	3.6e-05	2.3e-05	1.2e-05	3.6e-05	2.1e-05	4e-05
2102.41	2e-06	1.7e-05	0	2e-06	2.2e-05	9e-06	5.1e-05	4e-05	2.3e-05	2.3e-05	3.4e-05	4.4e-05
2104.34	1.3e-05	2.3e-05	1.9e-05	2.8e-05	1.8e-05	1.5e-05	5.5e-05	5.7e-05	4.6e-05	1.4e-05	5.3e-05	3.3e-05
2106.27	3.1e-05	4.8e-05	4.7e-05	5.6e-05	2.2e-05	2.8e-05	5.4e-05	8.1e-05	7e-05	2.4e-05	7.4e-05	3.3e-05
2108.2	4.9e-05	6.4e-05	7.1e-05	6.4e-05	4.6e-05	7.2e-05	6.8e-05	0.000107	8.9e-05	5.6e-05	8.5e-05	4.4e-05
2110.12	6.3e-05	6.2e-05	7.3e-05	5.8e-05	8.3e-05	0.000104	8.2e-05	0.000124	0.000106	0.0001	7.8e-05	6.4e-05
2112.05	5.5e-05	5.6e-05	5.3e-05	3.8e-05	0.0001	7.7e-05	7.2e-05	0.00011	0.000101	0.000106	6.4e-05	6.7e-05
2113.98	4.7e-05	4.9e-05	2.3e-05	2e-05	7.7e-05	3.5e-05	5.5e-05	8.1e-05	7.7e-05	7.9e-05	5.8e-05	5.2e-05
2115.91	2.8e-05	3.6e-05	6e-06	5e-06	4.9e-05	8e-06	3.2e-05	3.8e-05	3.5e-05	3.8e-05	4.6e-05	2e-05
2117.84	8e-06	2.7e-05	1.8e-05	2e-06	2.8e-05	-5e-06	2e-06	3e-06	-1.3e-05	1e-05	2.8e-05	4e-06
2119.77	8e-06	2.5e-05	3.5e-05	5e-06	2.4e-05	1.3e-05	-7e-06	-3e-06	-2.8e-05	6e-06	1.3e-05	1e-05
2121.7	1e-05	2.3e-05	4.7e-05	2e-05	4.4e-05	4.7e-05	1.6e-05	2.3e-05	-7e-06	1e-05	2e-05	2.2e-05
2123.63	3e-06	1.2e-05	5.3e-05	4.1e-05	5.2e-05	4.1e-05	2.2e-05	5.1e-05	2e-05	3e-06	2.9e-05	3.7e-05
2125.56	-1e-06	1.7e-05	4e-05	4e-05	3.8e-05	1.6e-05	7e-06	5.8e-05	2.4e-05	-1e-05	2.9e-05	4.4e-05
2127.48	-3e-06	2.1e-05	1.2e-05	1.9e-05	1.3e-05	3e-06	-1.8e-05	4.1e-05	8e-06	-1.7e-05	1e-05	4.3e-05
2129.41	-1.6e-05	7e-06	-3e-06	-1.2e-05	5e-06	-8e-06	-3.3e-05	5e-06	-1.6e-05	-1.8e-05	-2e-05	2.8e-05
2131.34	-2.3e-05	-1.5e-05	-1.2e-05	-3.6e-05	1e-06	-1.6e-05	-4.1e-05	-2e-05	-3.9e-05	-2.2e-05	-4e-05	-1.7e-05
2133.27	-1.8e-05	-2.6e-05	-2.8e-05	-4.9e-05	-1.3e-05	-8e-06	-3.8e-05	-2.4e-05	-4.1e-05	-3.7e-05	-4.9e-05	-5.6e-05
2135.2	-2e-05	-2e-05	-2.8e-05	-4e-05	-2.6e-05	0	-2.9e-05	-1.6e-05	-4.4e-05	-4.7e-05	-3.6e-05	-6.1e-05
2137.13	-2.4e-05	-1.1e-05	-1.9e-05	-3.3e-05	-3.6e-05	-1.1e-05	-1.4e-05	-1.9e-05	-5.1e-05	-4.8e-05	-2.4e-05	-4.7e-05
2139.06	-1.4e-05	8e-06	-1.3e-05	-3.2e-05	-3.8e-05	-2.2e-05	-5e-06	-2.4e-05	-5.8e-05	-4.5e-05	-8e-06	-2.8e-05
2140.99	-1.5e-05	7e-06	-4e-06	-3.1e-05	-3.5e-05	-3.8e-05	-1e-05	-2.3e-05	-6.2e-05	-4.1e-05	-4e-06	-1.7e-05
2142.91	-2.3e-05	-1.9e-05	4e-06	-3.9e-05	-2.9e-05	-5.9e-05	3e-06	-2.5e-05	-5.7e-05	-3.5e-05	-1.4e-05	-1.4e-05
2144.84	-2.5e-05	-5e-05	-1e-05	-4e-05	-2.2e-05	-6e-05	-5e-06	-3.3e-05	-4.6e-05	-3.8e-05	-2.8e-05	-1.6e-05
2146.77	-2.3e-05	-5.2e-05	-2.9e-05	-2.8e-05	-1.7e-05	-4.2e-05	-3.4e-05	-2.9e-05	-3.4e-05	-2.8e-05	-4.3e-05	-9e-06
2148.7	-2.7e-05	-2.6e-05	-2.6e-05	-1e-05	-1.6e-05	-3.4e-05	-5.9e-05	-1.2e-05	-2.7e-05	-2e-05	-3.9e-05	-6e-06
2150.63	-2.5e-05	0	-9e-06	2e-06	-1.9e-05	-3.7e-05	-7.2e-05	-7e-06	-1.2e-05	-2.2e-05	-1.9e-05	-3e-06
2152.56	-7e-06	1.8e-05	1.1e-05	1e-05	-2.1e-05	-2.7e-05	-7.3e-05	3e-06	4e-06	-1.5e-05	1.6e-05	3e-06
2154.49	3e-06	1.8e-05	2.4e-05	9e-06	-1.7e-05	-7e-06	-5e-05	1.4e-05	2.4e-05	9e-06	3e-05	9e-06
2156.42	6e-06	1.2e-05	1.6e-05	-5e-06	-9e-06	1e-05	-1.2e-05	1.1e-05	3.7e-05	2.9e-05	2.8e-05	2.6e-05
2158.35	-1e-06	9e-06	-1e-06	-2.3e-05	-3e-06	2.5e-05	-1.9e-05	1.3e-05	3.8e-05	2.9e-05	2.8e-05	4e-05
2160.27	-3.1e-05	3e-06	-2.3e-05	-4.1e-05	-1.5e-05	2.3e-05	-5.2e-05	7e-06	6e-06	1.2e-05	1.4e-05	2.3e-05
2162.2	-6.2e-05	-1.6e-05	-4.6e-05	-5e-05	-3.2e-05	-7e-06	-7.8e-05	-1.8e-05	-3.8e-05	-2.8e-05	-1.3e-05	-4e-06
2164.13	-7.6e-05	-4.5e-05	-5.7e-05	-5e-05	-4e-05	-4.1e-05	-8.8e-05	-3.9e-05	-6.3e-05	-4.9e-05	-4.1e-05	-2.2e-05
2166.06	-7.3e-05	-6.7e-05	-5e-05	-4.2e-05	-3.3e-05	-5.9e-05	-8.1e-05	-2.6e-05	-6.4e-05	-4.9e-05	-5.2e-05	-4.5e-05
2167.99	-5.2e-05	-5.9e-05	-4.2e-05	-4.4e-05	-2.1e-05	-5.2e-05	-6.3e-05	-9e-06	-4e-05	-4.2e-05	-5.3e-05	-4.8e-05
2169.92	-4.4e-05	-3.5e-05	-2.9e-05	-5.2e-05	-3.2e-05	-3.6e-05	-6.3e-05	-1.8e-05	-3.2e-05	-4.3e-05	-3.8e-05	-3.1e-05
2171.85	-5.8e-05	-2.8e-05	-2.6e-05	-5e-05	-5.4e-05	-2.6e-05	-8.4e-05	-4e-05	-5.4e-05	-5e-05	-1.6e-05	-2.1e-05
2173.78	-7.4e-05	-3.5e-05	-4.5e-05	-5.4e-05	-6e-05	-3.5e-05	-8.5e-05	-6.1e-05	-9.9e-05	-5.6e-05	-1.8e-05	-2.9e-05
2175.7	-7.3e-05	-6.1e-05	-6.7e-05	-6.4e-05	-5.8e-05	-6.6e-05	-9.1e-05	-6e-05	-0.00013	-7.2e-05	-4.9e-05	-4.4e-05
2177.63	-7e-05	-8.6e-05	-6.9e-05	-7.9e-05	-6.5e-05	-9.2e-05	-0.000107	-5.1e-05	-0.000135	-8.9e-05	-8.3e-05	-7e-05
2179.56	-6.6e-05	-8.9e-05	-6.2e-05	-9.1e-05	-6.5e-05	-9.5e-05	-0.000108	-5.4e-05	-0.000113	-0.000114	-0.000105	-0.000101
2181.49	-5.9e-05	-6.9e-05	-5.4e-05	-8.8e-05	-6.4e-05	-7.6e-05	-0.0001	-6.8e-05	-7.2e-05	-0.000121	-0.00011	-0.000102
2183.42	-7.8e-05	-5.1e-05	-4.8e-05	-6e-05	-5.5e-05	-6e-05	-8e-05	-8.3e-05	-5e-05	-9.4e-05	-8.6e-05	-7.4e-05
2185.35	-8.2e-05	-2.8e-05	-5.8e-05	-2.8e-05	-3.6e-05	-4.4e-05	-5.3e-05	-7.1e-05	-4.5e-05	-6e-05	-5.4e-05	-4.1e-05
2187.28	-6.4e-05	-1.2e-05	-6.3e-05	-2.5e-05	-3.9e-05	-2.9e-05	-2.8e-05	-3.2e-05	-4.6e-05	-3.1e-05	-3.1e-05	-1.7e-05
2189.21	-4.9e-05	-3e-05	-5.9e-05	-5.1e-05	-5.1e-05	-2.9e-05	-2.6e-05	-6e-06	-5.6e-05	-2.8e-05	-1.3e-05	-7e-06
2191.13	-3.7e-05	-4.3e-05	-4.4e-05	-8.2e-05	-5.5e-05	-2.8e-05	-3.6e-05	-9e-06	-6.5e-05	-4.8e-05	-1e-06	-1.5e-05
2193.06	-2.8e-05	-5.1e-05	-2.8e-05	-8e-05	-5.8e-05	-3.6e-05	-4.7e-05	-2.2e-05	-6.4e-05	-6.6e-05	-1.4e-05	-3.5e-05
2194.99	-3.5e-05	-6.3e-05	-3.4e-05	-4.8e-05	-5.8e-05	-4.8e-05	-5.7e-05	-4.7e-05	-6.2e-05	-6.6e-05	-3.3e-05	-4.8e-05
2196.92	-4.6e-05	-5e-05	-5.5e-05	-8e-06	-4.6e-05	-5.3e-05	-5.1e-05	-5.4e-05	-5.2e-05	-4.6e-05	-3.7e-05	-4.7e-05
2198.85	-4.4e-05	-1.6e-05	-5e-05	1.1e-05	-2.2e-05	-4.2e-05	-2.9e-05	-1.8e-05	-2.3e-05	-1.7e-05	-2.8e-05	-3.2e-05
2200.78	-3.4e-05	2e-06	-1.6e-05	1e-06	2e-06	-2.6e-05	-7e-06	1.6e-05	1e-05	2.4e-05	0	1e-06
2202.71	-2e-05	9e-06	1.8e-05	-2.2e-05	3e-05	-1.4e-05	1.1e-05	3.1e-05	3.9e-05	4.7e-05	3.7e-05	3.3e-05
2204.64	-3e-06	1.7e-05	5e-05	-4.4e-05	3.9e-05	7e-06	1.9e-05	4.7e-05	5.6e-05	4.1e-05	5.7e-05	4.5e-05
2206.57	-2e-06	6e-06	5.5e-05	-5.1e-05	2e-05	1.6e-05	1.6e-05	5.3e-05	5.3e-05	2e-05	4.7e-05	4.2e-05
2208.49	-1.4e-05	-1.6e-05	1.5e-05	-4.7e-05	3e-06	1.2e-05	2e-06	4e-05	4e-05	-3e-06	2.8e-05	3.7e-05
2210.42	-2.3e-05	-1.5e-05	-2e-05	-2.9e-05	6e-06	1e-06	-2.2e-05	1.9e-05	1.2e-05	-7e-06	1.9e-05	3.1e-05
2212.35	-3.3e-05	1e-06	-3.1e-05	4e-06	1.6e-05	-6e-06	-3.3e-05	2e-06	-2.4e-05	1e-06	9e-06	2.1e-05
2214.28	-3.1e-05	9e-06	-3.6e-05	2.8e-05	1.2e-05	-3e-06	-2.5e-05	-8e-06	-3.3e-05	6e-06	4e-06	1.5e-05
2216.21	-1.9e-05	1.7e-05	-2.7e-05	3e-05	1.3e-05	9e-06	-9e-06	8e-06	-2.6e-05	6e-06	6e-06	1e-05
2218.14	-5e-06	2.9e-05	4e-06	2.1e-05	1.6e-05	1.8e-05	1.1e-05	3.3e-05	-9e-06	4e-06	-5e-06	6e-06
2220.07	3e-06	3.4e-05	2.2e-05	3e-06	1.4e-05	1.5e-05	1.7e-05	4.1e-05	1.3e-05	5e-06	-1.4e-05	7e-06
2222	6e-06	1.6e-05	2.6e-05	-2.3e-05	1.1e-05	-1e-06	0	3.5e-05	8e-06	9e-06	-5e-06	0
2223.92	1.3e-05	-3e-06	2.9e-05	-2.8e-05	1e-06	-1.2e-05	-2.8e-05	1.3e-05	-2.7e-05	4e-06	1e-06	-5e-06
2225.85	6e-06	-2.2e-05	8e-06	-1.9e-05	-1.7e-05	-2.1e-05	-3.8e-05	-8e-06	-5.2e-05	-2.4e-05	-7e-06	-8e-06
2227.78	-1.3e-05	-3.8e-05	-1.8e-05	-1.1e-05	-3e-05	-2.6e-05	-3.9e-05	-2.3e-05	-5.3e-05	-5.1e-05	-9e-06	-1.6e-05
2229.71	-2.9e-05	-2.9e-05	-1.9e-05	-2e-06	-2.8e-05	-3.5e-05	-4.9e-05	-3.3e-05	-5.6e-05	-6.2e-05	-2e-05	-3.1e-05
2231.64	-3.2e-05	-8e-06	-7e-06	-1e-06	-2.3e-05	-4.4e-05	-4e-05	-4e-05	-5.3e-05	-6.7e-05	-3.9e-05	-4.1e-05
2233.57	-2.4e-05	4e-06	3e-06	-9e-06	-2.3e-05	-2.5e-05	-2e-05	-2.8e-05	-4.7e-05	-5.2e-05	-2.1e-05	-3.1e-05
2235.5	-1.3e-05	4e-06	1.7e-05	-1.6e-05	-2.9e-05	4e-06	0	7e-06	-4e-05	-2.6e-05	-2e-06	-8e-06
2237.43	-6e-06	7e-06	1.8e-05	-1.3e-05	-2.8e-05	2e-05	1e-05	2.9e-05	-2.2e-05	-1.1e-05	-1e-06	1.9e-05
2239.36	-1.6e-05	1.4e-05	-1e-06	-1.4e-05	-1.6e-05	1.2e-05	1.5e-05	3.8e-05	-4e-06	-1e-06	2e-06	2.6e-05
2241.28	-2.1e-05	1.4e-05	-1.2e-05	-1.7e-05	-4e-06	-7e-06	3e-06	4.1e-05	-6e-06	5e-06	9e-06	1e-05
2243.21	-8e-06	-1e-06	-2.3e-05	-2e-06	2e-06	-2.6e-05	-1.4e-05	1.8e-05	-2.8e-05	-1.6e-05	2e-06	-2e-06
2245.14	-6e-06	-1.8e-05	-3.6e-05	1.7e-05	1e-06	-3e-05	-1.7e-05	-2.1e-05	-4.3e-05	-4.4e-05	1.1e-05	1e-06
2247.07	-8e-06	-2.3e-05	-1.3e-05	2.3e-05	-4e-06	-1.4e-05	-1.3e-05	-2.5e-05	-2.1e-05	-3.9e-05	4.5e-05	1.4e-05
2249	-1.7e-05	-1.2e-05	2.7e-05	1.6e-05	9e-06	3e-06	-1.1e-05	3e-06	1.6e-05	-1.5e-05	4.7e-05	2.7e-05
2250.93	-2.3e-05	1.5e-05	4.5e-05	1e-05	2.3e-05	1.1e-05	2e-06	3e-05	4e-05	1.8e-05	3.4e-05	3.5e-05
2252.86	-1e-05	3.2e-05	5e-05	2.1e-05	2.4e-05	1.3e-05	2.3e-05	5.2e-05	4.6e-05	4.2e-05	3e-05	2.9e-05
2254.79	4e-06	1.7e-05	3.5e-05	3.2e-05	2e-05	1.8e-05	1.8e-05	6.6e-05	2.8e-05	5.5e-05	2.5e-05	1.2e-05
2256.71	4e-06	6e-06	7e-06	2.9e-05	1e-05	1.5e-05	-5e-06	4.4e-05	5e-06	4.6e-05	1.6e-05	6e-06
2258.64	-4e-06	1.4e-05	-4e-06	1.3e-05	-3e-06	1e-06	-2.8e-05	9e-06	-1.7e-05	2.4e-05	2e-05	1.1e-05
2260.57	-6e-06	1.3e-05	1e-06	-4e-06	-2.2e-05	-1e-05	-4.3e-05	0	-4e-05	6e-06	1.4e-05	1.5e-05
2262.5	-1.8e-05	1.4e-05	-1.4e-05	-1e-05	-3.4e-05	-1.4e-05	-3.5e-05	-5e-06	-6e-05	-2.1e-05	-1.5e-05	1e-05
2264.43	-2.9e-05	3e-06	-3.1e-05	-7e-06	-2.9e-05	-2.2e-05	-1.1e-05	-1.4e-05	-7.3e-05	-3.6e-05	-2.5e-05	-5e-06
2266.36	-3.1e-05	-2.5e-05	-1e-05	-2e-06	-5e-06	-1.1e-05	0	-6e-06	-6.8e-05	-2.9e-05	-1e-05	-1.1e-05
2268.29	-2.5e-05	-2.8e-05	6e-06	-1.1e-05	2.2e-05	1.8e-05	-4e-06	8e-06	-4.5e-05	-9e-06	5e-06	0
2270.22	-1.4e-05	-4e-06	1.8e-05	-1.8e-05	2.6e-05	3e-05	-7e-06	-5e-06	-2e-05	1.4e-05	3.1e-05	1.6e-05
2272.15	-3e-06	1.7e-05	3e-05	-1.1e-05	1.7e-05	2.6e-05	-1e-05	-1.5e-05	-8e-06	1.3e-05	5.1e-05	2.1e-05
2274.07	7e-06	1.8e-05	2.3e-05	-1e-05	2e-06	1e-05	-2.7e-05	5e-06	2e-06	-8e-06	3.4e-05	5e-06
2276	2e-05	2e-05	6e-06	-1.3e-05	1e-06	-1.5e-05	-3.7e-05	2.5e-05	9e-06	-2.3e-05	4e-06	-7e-06
2277.93	2.5e-05	2.3e-05	1.6e-05	-1.3e-05	1.4e-05	-2.3e-05	-2.6e-05	2.7e-05	1.5e-05	-2e-05	-5e-06	0
2279.86	1.8e-05	2.5e-05	4.4e-05	-7e-06	1.2e-05	3e-06	9e-06	2.3e-05	1.2e-05	-1.5e-05	3e-06	2.3e-05
2281.79	1.3e-05	2.7e-05	4.4e-05	1.6e-05	3e-06	2.5e-05	4.7e-05	1.4e-05	-8e-06	0	1.4e-05	2.7e-05
2283.72	5e-06	2.5e-05	3.4e-05	4.3e-05	-3e-06	3.1e-05	7.2e-05	1e-05	-3.3e-05	2.2e-05	3.4e-05	0
2285.65	-1e-06	2.7e-05	3e-05	7.7e-05	1e-06	3.8e-05	7.8e-05	1.8e-05	-4.9e-05	1.7e-05	4.2e-05	-1.6e-05
2287.58	-8e-06	1.9e-05	2.3e-05	0.000112	-2e-06	4.1e-05	6e-05	3.6e-05	-4.9e-05	1.5e-05	3.4e-05	-1.8e-05
2289.5	-3.2e-05	-4e-06	1.6e-05	0.000119	-1.3e-05	4.8e-05	5.3e-05	3.1e-05	-4.3e-05	1.8e-05	4.3e-05	-1.9e-05
2291.43	-7e-05	-1.7e-05	1.8e-05	0.000102	-1.1e-05	7e-05	5.4e-05	-4e-06	-4.1e-05	1e-06	4.8e-05	-1.8e-05
2293.36	-8.6e-05	-2.3e-05	2.4e-05	9.4e-05	-4e-06	8.2e-05	5.6e-05	-1.2e-05	-5.4e-05	-1.7e-05	2.5e-05	-1.8e-05
2295.29	-6.9e-05	-2.8e-05	1.4e-05	8.6e-05	-5e-06	6.6e-05	6.3e-05	3e-06	-7e-05	-1.5e-05	6e-06	-3.6e-05
2297.22	-5.4e-05	-1.5e-05	-1.2e-05	8.8e-05	-5e-06	5.4e-05	8.5e-05	-1e-06	-6.7e-05	-1.1e-05	8e-06	-3.9e-05
2299.15	-5.3e-05	1.3e-05	-1.7e-05	0.000121	2e-06	6.9e-05	0.000126	-6e-06	-5.1e-05	1.1e-05	3.3e-05	-4e-06
2301.08	-6e-05	2.3e-05	-6e-06	0.000152	6e-06	8.7e-05	0.000164	2.3e-05	-3.7e-05	4.6e-05	7.3e-05	1.2e-05
2303.01	-9.5e-05	1.1e-05	7e-06	0.000169	-4e-06	0.000101	0.000172	4.1e-05	-5.8e-05	4.3e-05	9.4e-05	-1.5e-05
2304.94	-0.000149	-1.1e-05	4.3e-05	0.000184	-3.6e-05	0.000114	0.000141	4e-05	-0.000142	1.9e-05	7.9e-05	-3.5e-05
2306.86	-0.000172	-4.7e-05	6e-05	0.000173	-9.6e-05	9.8e-05	8.8e-05	3.7e-05	-0.000247	-3.6e-05	5.2e-05	-6.1e-05
2308.79	-0.000166	-8.9e-05	2.7e-05	0.000122	-0.000153	4.7e-05	3.3e-05	-1.2e-05	-0.000322	-0.000119	3.2e-05	-8.5e-05
2310.72	-0.000145	-9.4e-05	-2.2e-05	8.4e-05	-0.000175	3e-06	3e-06	-8.4e-05	-0.00034	-0.000182	-2e-06	-7.5e-05
2312.65	-0.000145	-6.7e-05	-5.9e-05	9.9e-05	-0.000181	0	1.6e-05	-0.000116	-0.000349	-0.000188	-4.9e-05	-8.3e-05
2314.58	-0.000202	-8.1e-05	-7.8e-05	0.000149	-0.000178	1.7e-05	5.2e-05	-0.000134	-0.000467	-0.000193	-9.1e-05	-0.000156
2316.51	-0.000278	-0.000134	-7.2e-05	0.000212	-0.000185	3.6e-05	7.9e-05	-0.000161	-0.000645	-0.00021	-0.000125	-0.000227
2318.44	-0.000298	-0.000157	-4.6e-05	0.000243	-0.000214	3.6e-05	5e-05	-0.000151	-0.000779	-0.000242	-0.000115	-0.000223
2320.37	-0.000247	-0.000124	-4.3e-05	0.000187	-0.00026	-9e-06	-7e-06	-0.000111	-0.000813	-0.0003	-6.4e-05	-0.000167
2322.29	-0.000185	-7.1e-05	-4.6e-05	0.000115	-0.000305	-5e-05	-3.2e-05	-8.8e-05	-0.000741	-0.000348	-3.9e-05	-9.4e-05
2324.22	-0.000169	-4.9e-05	-3.9e-05	9.6e-05	-0.000327	-6.7e-05	-2.1e-05	-0.000102	-0.000645	-0.00035	-6.2e-05	-6e-05
2326.15	-0.000223	-6.7e-05	-4.9e-05	8.7e-05	-0.000324	-8.4e-05	-4.5e-05	-0.000143	-0.000628	-0.000316	-0.000103	-7.3e-05
2328.08	-0.00025	-0.000105	-5.2e-05	5.6e-05	-0.000261	-9.5e-05	-7.9e-05	-0.000157	-0.000662	-0.000312	-0.000151	-0.000124
2330.01	-0.000175	-0.000107	-5.1e-05	4.2e-05	-0.000205	-8.1e-05	-7.3e-05	-0.000114	-0.000618	-0.00028	-0.000166	-0.000141
2331.94	-6.8e-05	-4.3e-05	-5.8e-05	5.3e-05	-0.000179	-4.6e-05	-6.8e-05	-5.7e-05	-0.000519	-0.000216	-0.000116	-9.3e-05
2333.87	6e-06	2e-06	-5.5e-05	7.5e-05	-0.000156	-7e-06	-1.1e-05	-9e-06	-0.000398	-0.000166	-2.8e-05	-4.8e-05
2335.8	-1e-06	-3e-06	-2e-06	0.000103	-0.000118	2.4e-05	6.8e-05	-6e-06	-0.000294	-0.000125	4.3e-05	-3.5e-05
2337.72	-6.4e-05	-2.7e-05	5.7e-05	0.000139	-7.5e-05	3e-05	9.9e-05	-1.9e-05	-0.000189	-5.5e-05	9.2e-05	-3.6e-05
2339.65	-9.3e-05	-4.3e-05	7.3e-05	0.000101	-1.8e-05	-2e-05	3.2e-05	1.1e-05	-4.7e-05	6e-06	6.8e-05	-4.4e-05
2341.58	6.3e-05	3.4e-05	0.000113	-3e-05	0.000177	-4.2e-05	-5.4e-05	9.2e-05	0.000384	0.000142	3.3e-05	6e-06
2343.51	0.000359	0.000217	0.000192	-0.000105	0.000457	7.2e-05	-1.6e-05	0.000251	0.001016	0.000454	0.00012	0.000206
2345.44	0.000512	0.000349	0.000214	-5.6e-05	0.00059	0.000232	0.000138	0.000375	0.001256	0.000638	0.000231	0.000395
2347.37	0.000353	0.000282	0.000161	5.2e-05	0.00044	0.000288	0.000292	0.000314	0.000788	0.000471	0.000264	0.000372
2349.3	-3.9e-05	6.9e-05	5.6e-05	0.000215	5.7e-05	0.000216	0.000315	9.7e-05	-0.000197	5e-05	0.000167	0.000146
2351.23	-0.000416	-0.000193	-8.1e-05	0.00038	-0.000406	4.3e-05	0.00023	-0.000168	-0.001247	-0.000449	2e-06	-0.000182
2353.16	-0.000597	-0.000373	-0.000165	0.000381	-0.000668	-0.000116	5.4e-05	-0.000358	-0.001788	-0.000767	-0.000144	-0.00043
2355.08	-0.000495	-0.000307	-0.000147	0.000265	-0.000587	-0.000138	-0.000107	-0.000338	-0.001523	-0.000712	-0.00019	-0.000444
2357.01	-0.000267	-0.000112	-9.2e-05	0.000192	-0.000309	-4.1e-05	-0.000109	-0.00014	-0.000848	-0.000371	-0.000164	-0.000255
2358.94	-0.000122	2e-05	-4e-05	0.000102	-8.7e-05	3.3e-05	-6e-05	1.5e-05	-0.000195	-9.9e-05	-0.00013	-5.3e-05
2360.87	9e-06	0.000117	4.7e-05	-9e-06	8.9e-05	1.6e-05	-9.2e-05	9.2e-05	0.000308	9e-05	-3.9e-05	0.000117
2362.8	0.000226	0.000213	0.000154	-8.2e-05	0.000279	9e-06	-0.000142	0.000183	0.000678	0.000313	8.2e-05	0.000261
2364.73	0.000456	0.000268	0.000263	-0.00017	0.000434	4.5e-05	-0.000113	0.000245	0.001002	0.000502	0.000229	0.000351
2366.66	0.000599	0.000328	0.000331	-0.000252	0.000583	0.000131	-2.5e-05	0.000314	0.001363	0.000596	0.000328	0.000404
2368.59	0.00069	0.000395	0.00032	-0.000261	0.000682	0.000184	8.7e-05	0.000407	0.001618	0.000635	0.000351	0.000438
2370.51	0.000714	0.000425	0.000287	-0.00023	0.000703	0.0002	0.00019	0.000464	0.001729	0.00067	0.000341	0.000488
2372.44	0.000683	0.000449	0.000277	-0.000212	0.000657	0.000197	0.000209	0.000484	0.001691	0.000642	0.000329	0.000515
2374.37	0.00066	0.000474	0.000272	-0.00018	0.00063	0.000154	0.000118	0.000484	0.001469	0.000656	0.000302	0.000515
2376.3	0.000628	0.000453	0.000274	-0.000168	0.000632	0.000123	3e-06	0.000442	0.001207	0.00069	0.000256	0.000493
2378.23	0.000564	0.000406	0.000293	-0.000159	0.000578	9.9e-05	-6.1e-05	0.000376	0.000996	0.000611	0.000234	0.000443
2380.16	0.000502	0.00037	0.000291	-0.000117	0.000485	6.7e-05	-7.7e-05	0.000324	0.000781	0.000445	0.000219	0.000397
2382.09	0.000467	0.000307	0.000248	-7.8e-05	0.000367	3e-05	-5.6e-05	0.000264	0.000561	0.000305	0.000212	0.000357
2384.02	0.000408	0.000245	0.000198	-4.2e-05	0.000252	1.6e-05	-5e-06	0.000215	0.000384	0.000198	0.000191	0.000306
2385.95	0.000333	0.000207	0.000158	3e-06	0.000186	4.5e-05	4.9e-05	0.000193	0.000256	0.000132	0.000161	0.000241
2387.87	0.00025	0.000169	0.000116	6.3e-05	0.000152	8.8e-05	7.7e-05	0.000189	0.000186	0.000128	0.00013	0.000198
2389.8	0.000155	0.000149	9.8e-05	0.000107	0.000136	0.000114	9.8e-05	0.000163	0.000136	0.000133	0.000105	0.000175
2391.73	8.8e-05	0.000153	0.000109	0.000115	0.00012	0.000121	0.000104	0.000126	9.5e-05	0.000131	0.000109	0.000153
2393.66	5.7e-05	0.000144	0.000109	8.7e-05	0.000116	0.000103	8.7e-05	9.1e-05	8.1e-05	0.000116	0.000113	0.000126
2395.59	6.2e-05	0.000114	9.3e-05	4.6e-05	0.000116	6.5e-05	7.7e-05	6.5e-05	8.1e-05	9e-05	0.000115	9.7e-05
2397.52	8.7e-05	9.5e-05	9.2e-05	3.5e-05	0.000112	4.5e-05	6.3e-05	8.1e-05	8.9e-05	9e-05	0.000125	8.4e-05
2399.45	0.000105	8.8e-05	0.0001	7.1e-05	0.000106	6.4e-05	4.9e-05	0.000108	0.000102	9.9e-05	0.000124	8.8e-05
2401.38	0.000113	9e-05	0.000105	0.000122	8.7e-05	9.5e-05	6.4e-05	0.000135	0.000109	9.9e-05	0.000114	9.3e-05
2403.3	0.000119	0.000105	0.000138	0.000137	8.7e-05	0.000112	0.000106	0.000145	0.000101	0.000112	0.000118	9e-05
2405.23	0.00014	0.000131	0.000172	0.000118	9.6e-05	0.00013	0.000135	0.000155	9.2e-05	0.000129	0.000133	9.1e-05
2407.16	0.000148	0.000147	0.000166	9.9e-05	9.7e-05	0.000128	0.000138	0.000161	0.000106	0.00012	0.000124	0.000102
2409.09	0.000131	0.000146	0.000127	8.8e-05	0.000105	0.000102	0.000113	0.000138	0.000119	0.000103	0.000108	0.000118
2411.02	0.000103	0.000141	8.7e-05	7.9e-05	0.000113	8.2e-05	6.4e-05	9.6e-05	0.000122	9.4e-05	0.000103	0.000132
2412.95	8e-05	0.000125	7.4e-05	8.8e-05	0.000102	7.2e-05	4e-05	6.4e-05	0.000112	6.7e-05	0.000102	0.000122
2414.88	8.6e-05	0.000102	0.000103	0.000105	8.5e-05	6.7e-05	5.5e-05	7.3e-05	8.5e-05	5.4e-05	0.0001	9.4e-05
2416.81	0.000111	9.4e-05	0.000155	0.000107	9.6e-05	7.9e-05	9e-05	9.7e-05	5.5e-05	6.8e-05	9.5e-05	7.6e-05
2418.74	0.000142	0.000114	0.000173	0.00011	0.000114	0.000112	0.000121	0.000123	3.4e-05	8.3e-05	9.3e-05	9.2e-05
2420.66	0.00016	0.000152	0.000154	0.000128	0.000111	0.000144	0.000142	0.000155	4.2e-05	9.9e-05	9.9e-05	0.000125
2422.59	0.000163	0.000184	0.000131	0.000159	0.000115	0.000169	0.000151	0.000159	7.7e-05	0.000114	0.00011	0.00016
2424.52	0.000161	0.000193	0.000139	0.000168	0.000127	0.000172	0.000145	0.000142	0.000125	0.000115	0.00013	0.000167
2426.45	0.000148	0.000181	0.000169	0.00016	0.000138	0.000144	0.000128	0.000145	0.00016	0.000122	0.000157	0.000138
2428.38	0.000139	0.000165	0.000184	0.000152	0.000151	0.000108	0.000105	0.000153	0.000156	0.000142	0.000155	0.000109
2430.31	0.000128	0.000161	0.000164	0.000131	0.000148	9.2e-05	9e-05	0.000151	0.000132	0.000142	0.000137	0.000101
2432.24	0.000122	0.000168	0.000132	0.000125	0.000118	9.5e-05	9.1e-05	0.000155	0.000109	0.000123	0.00013	0.000126
2434.17	0.000133	0.000182	0.00013	0.000147	9.8e-05	0.000118	0.00012	0.000163	0.000114	0.000104	0.000128	0.00016
2436.09	0.000158	0.000185	0.000157	0.000172	0.000118	0.000143	0.000147	0.000168	0.000148	0.000106	0.00014	0.000175
2438.02	0.000173	0.000176	0.000182	0.000175	0.000158	0.00015	0.000165	0.000181	0.000173	0.000126	0.000161	0.000161
2439.95	0.000177	0.000171	0.000185	0.000172	0.000181	0.000145	0.000175	0.000189	0.000177	0.000165	0.000177	0.000147
2441.88	0.000177	0.000167	0.000179	0.000162	0.000176	0.000151	0.000174	0.000172	0.00017	0.000191	0.000171	0.000156
2443.81	0.000156	0.000156	0.000173	0.000136	0.00015	0.000166	0.000164	0.000151	0.000163	0.000184	0.000168	0.000152
2445.74	0.000139	0.000148	0.000159	0.000123	0.000137	0.000159	0.000139	0.000146	0.000157	0.00017	0.000158	0.000145
2447.67	0.000141	0.00016	0.000136	0.000121	0.00013	0.000141	0.000102	0.000145	0.000142	0.000158	0.000136	0.000127
2449.6	0.000136	0.000163	0.000105	0.000121	0.00012	0.000123	7.4e-05	0.000139	0.000116	0.000135	0.000126	0.000102
2451.53	0.000127	0.000147	9.5e-05	0.000122	0.00012	0.000105	8.4e-05	0.000133	9.4e-05	0.000116	0.000113	0.000105
2453.45	0.000129	0.000142	0.000124	0.000138	0.000124	0.000101	0.00011	0.000125	0.000102	0.000111	0.00011	0.00013
2455.38	0.000139	0.000147	0.000168	0.000161	0.000142	0.000117	0.000133	0.000138	0.000133	0.000108	0.000124	0.000152
2457.31	0.000144	0.000143	0.000196	0.000177	0.000157	0.000125	0.000137	0.000165	0.000146	0.000113	0.00014	0.000154
2459.24	0.000148	0.000145	0.000187	0.000183	0.000154	0.000125	0.00013	0.000171	0.000144	0.000127	0.000142	0.000147
2461.17	0.00015	0.000149	0.000157	0.000157	0.000122	0.00013	0.000115	0.000145	0.000119	0.000132	0.000136	0.000139
2463.1	0.000134	0.000133	0.000132	0.000133	0.000106	0.000132	9.3e-05	0.000117	8.1e-05	0.000122	0.000134	0.000142
2465.03	0.000122	0.000142	0.000121	0.000124	0.000116	0.000129	8e-05	0.000113	8.1e-05	0.000115	0.000122	0.000148
2466.96	0.000126	0.000163	0.000129	0.000126	0.000119	0.000132	8.1e-05	0.000115	9.8e-05	0.000106	0.000113	0.000129
2468.88	0.000141	0.000161	0.000135	0.000124	0.000138	0.000131	9.8e-05	0.000136	0.000118	9.2e-05	0.000112	0.000103
2470.81	0.000156	0.000159	0.000154	0.000128	0.000149	0.000126	0.00014	0.000158	0.000126	9.5e-05	0.000121	9.2e-05
2472.74	0.000184	0.00017	0.000179	0.000153	0.000154	0.000141	0.000193	0.000176	0.000135	0.000108	0.00013	0.000103
2474.67	0.000216	0.00018	0.000204	0.000178	0.000159	0.000165	0.000209	0.000201	0.000142	0.000122	0.000138	0.000139
2476.6	0.000217	0.000184	0.000217	0.000202	0.000162	0.000172	0.000191	0.000207	0.000148	0.000143	0.000147	0.00018
2478.53	0.000199	0.000193	0.0002	0.000191	0.000158	0.00016	0.000163	0.000195	0.000158	0.000164	0.000154	0.000193
2480.46	0.000168	0.000181	0.000173	0.000152	0.000153	0.000138	0.000134	0.000161	0.000165	0.000167	0.000172	0.000178
2482.39	0.000127	0.000169	0.000144	0.000121	0.000163	0.000109	0.000116	0.000127	0.000161	0.00015	0.000182	0.000158
2484.32	0.000106	0.000167	0.000133	0.000106	0.000161	0.000105	0.000112	0.000121	0.000131	0.000129	0.000175	0.000149
2486.24	0.000104	0.000146	0.000143	0.000108	0.000155	0.000134	0.000117	0.000147	0.000118	0.000115	0.00016	0.000144
2488.17	0.000103	0.000143	0.000165	0.00012	0.00015	0.000149	0.000122	0.000172	0.000124	0.00012	0.000147	0.000144
2490.1	0.000116	0.000164	0.000174	0.000135	0.000153	0.000149	0.000133	0.000194	0.000138	0.000143	0.000155	0.000152
2492.03	0.000155	0.000177	0.000161	0.000152	0.000165	0.000156	0.000146	0.000226	0.000166	0.000161	0.000174	0.000156
2493.96	0.000193	0.000183	0.000149	0.000185	0.000167	0.000162	0.000166	0.00022	0.000189	0.000171	0.000183	0.000167
2495.89	0.000206	0.000167	0.000143	0.000202	0.000152	0.000159	0.000167	0.000189	0.000182	0.000166	0.000169	0.00018
2497.82	0.000183	0.000145	0.000142	0.000176	0.000142	0.000161	0.000145	0.000161	0.000165	0.000149	0.000149	0.000171
2499.75	0.000126	0.000147	0.000155	0.000133	0.000158	0.000157	0.000125	0.000138	0.000166	0.000144	0.000131	0.000148
2501.67	8.2e-05	0.000174	0.000168	0.0001	0.000174	0.000144	0.0001	0.000134	0.000153	0.000133	0.000116	0.000135
2503.6	9.6e-05	0.000191	0.000162	8.8e-05	0.000175	0.000141	9.1e-05	0.000158	0.00012	0.000124	0.000122	0.000127
2505.53	0.000128	0.000166	0.000152	0.000122	0.000164	0.000137	0.000115	0.000186	9.4e-05	0.00013	0.000129	0.000124
2507.46	0.000167	0.000153	0.000152	0.000179	0.000145	0.000135	0.000153	0.000183	9e-05	0.000125	0.000128	0.000138
2509.39	0.000201	0.000157	0.00017	0.000199	0.000135	0.000137	0.00017	0.000167	0.000101	0.000118	0.000136	0.000145
2511.32	0.000198	0.000166	0.000175	0.000194	0.000151	0.000151	0.000179	0.000154	0.000111	0.000117	0.000151	0.000132
2513.25	0.000176	0.000159	0.000169	0.000175	0.000165	0.000165	0.000177	0.000148	0.000112	0.000103	0.000153	0.000128
2515.18	0.000149	0.000131	0.000159	0.000138	0.000158	0.000159	0.000149	0.000144	0.000101	9e-05	0.000135	0.000119
2517.1	0.000119	0.000106	0.000142	0.000113	0.00013	0.000128	0.000115	0.000137	9.2e-05	8.8e-05	0.00012	8.9e-05
2519.03	9e-05	8.2e-05	0.000125	0.000113	9.3e-05	0.000109	9e-05	0.000131	9.4e-05	9e-05	0.000109	9.5e-05
2520.96	0.000106	8.5e-05	0.000119	0.000117	6.9e-05	0.000103	6.8e-05	0.00013	8.4e-05	0.000105	9.6e-05	0.000124
2522.89	0.000154	0.000108	0.000119	0.000123	7.2e-05	9.5e-05	6.2e-05	0.000134	6.9e-05	0.00012	0.000103	0.000153
2524.82	0.000185	0.000128	0.000123	0.000156	0.0001	0.00012	9.4e-05	0.000134	8.2e-05	0.000122	0.000129	0.000162
2526.75	0.000198	0.000153	0.000154	0.000175	0.000139	0.000148	0.000131	0.000141	0.000122	0.000112	0.000142	0.000138
2528.68	0.000192	0.000203	0.000194	0.000175	0.000168	0.000154	0.000166	0.000155	0.000158	0.000112	0.000151	0.000123
2530.61	0.00017	0.000247	0.000212	0.000162	0.000171	0.000146	0.000185	0.00017	0.000174	0.000134	0.000172	0.000134
2532.54	0.000139	0.00023	0.000209	0.000128	0.000171	0.000132	0.00017	0.000182	0.000179	0.000165	0.00017	0.000154
2534.46	0.000121	0.000172	0.000172	9.3e-05	0.000163	0.000104	0.000132	0.000188	0.000174	0.000181	0.00014	0.000154
2536.39	0.000116	0.000132	0.000119	8.1e-05	0.00015	8.3e-05	8.9e-05	0.000162	0.00016	0.000161	0.000129	0.000144
2538.32	0.000101	0.000111	8.3e-05	0.000109	0.000136	9.8e-05	6e-05	0.000117	0.00014	0.000125	0.000124	0.000122
2540.25	0.000109	0.00012	7.3e-05	0.000131	0.000119	0.000114	5.9e-05	0.000111	0.000121	0.000105	0.000112	0.000114
2542.18	0.000141	0.000162	0.000108	0.000144	0.000109	0.000125	8.3e-05	0.000133	0.000104	0.000102	0.000112	0.000139
2544.11	0.00015	0.000186	0.000161	0.000154	0.00013	0.000127	0.000107	0.000158	9.3e-05	0.000118	0.000116	0.000146
2546.04	0.000143	0.000183	0.000195	0.000152	0.000152	0.000135	0.000114	0.000172	0.000111	0.000134	0.000121	0.00014
2547.97	0.000137	0.000181	0.000197	0.000133	0.000151	0.000162	0.000121	0.000164	0.000127	0.000139	0.000148	0.00014
2549.89	0.000137	0.000162	0.000183	0.00011	0.00015	0.000169	0.000121	0.000141	0.000109	0.000132	0.00017	0.000152
2551.82	0.000136	0.000138	0.00016	9.3e-05	0.000137	0.000152	0.000117	0.000118	0.000104	0.00011	0.000161	0.00015
2553.75	0.000133	0.00013	0.000144	7.3e-05	0.000117	0.000115	0.000108	0.000105	0.000111	9.2e-05	0.000127	0.000134
2555.68	0.00012	0.000111	0.000127	8.9e-05	0.000103	7.4e-05	8.2e-05	9.6e-05	0.00011	8.2e-05	7.9e-05	0.000101
2557.61	9.8e-05	9.7e-05	9.3e-05	0.00013	9.4e-05	6.5e-05	6.9e-05	0.0001	9.9e-05	8.4e-05	4.9e-05	6.8e-05
2559.54	0.000106	0.000111	9.3e-05	0.000159	8.4e-05	9.5e-05	6.7e-05	0.000131	8.5e-05	8.5e-05	4.9e-05	5.9e-05
2561.47	0.000128	0.000124	0.000119	0.000167	9.2e-05	0.000129	9.2e-05	0.000152	5.7e-05	7.2e-05	7.7e-05	6.9e-05
2563.4	0.00015	0.000131	0.000147	0.000158	0.000122	0.00013	0.00012	0.000165	4.1e-05	6e-05	0.000105	9e-05
2565.33	0.000166	0.000154	0.000165	0.000149	0.000146	0.000127	0.000137	0.000157	6.9e-05	6.7e-05	0.000125	0.000115
2567.25	0.000178	0.000169	0.000168	0.000149	0.000148	0.000114	0.000143	0.000148	0.000102	9.7e-05	0.000133	0.000135
2569.18	0.000161	0.000152	0.000169	0.000144	0.00014	0.000105	0.000142	0.000161	0.000128	0.000128	0.000132	0.000139
2571.11	0.000139	0.000143	0.00016	0.000126	0.000138	0.000111	0.000141	0.000172	0.000147	0.000148	0.000154	0.000134
2573.04	0.000137	0.000153	0.000167	0.000115	0.000133	0.000116	0.000132	0.000174	0.000141	0.000137	0.000159	0.00012
2574.97	0.000138	0.000169	0.000159	0.000127	0.000133	0.000129	0.000153	0.000154	0.000142	0.000124	0.000143	0.000115
2576.9	0.000165	0.000196	0.000147	0.000164	0.000152	0.00015	0.000173	0.000147	0.000164	0.000137	0.000144	0.000141
2578.83	0.0002	0.000218	0.000159	0.000207	0.000184	0.000183	0.000192	0.000162	0.000185	0.00017	0.000155	0.000184
2580.76	0.000219	0.000224	0.000195	0.00023	0.000217	0.0002	0.000205	0.000209	0.000194	0.000202	0.000168	0.000217
2582.68	0.000209	0.000224	0.000229	0.000217	0.000249	0.000215	0.000204	0.000252	0.000199	0.000218	0.000199	0.000232
2584.61	0.000208	0.000242	0.000229	0.00021	0.000243	0.000231	0.000211	0.000273	0.000208	0.000214	0.000238	0.000226
2586.54	0.000208	0.000258	0.000243	0.000208	0.000211	0.00023	0.000225	0.000271	0.000206	0.000182	0.000245	0.000205
2588.47	0.000184	0.000239	0.000225	0.000194	0.00019	0.000217	0.000231	0.000224	0.000194	0.00016	0.000225	0.000185
2590.4	0.00017	0.000199	0.000181	0.000178	0.000196	0.000196	0.000204	0.000182	0.000187	0.000163	0.00021	0.000186
2592.33	0.000155	0.00017	0.000164	0.000159	0.000209	0.000174	0.000165	0.000167	0.000183	0.000183	0.000186	0.000197
2594.26	0.000168	0.000161	0.000157	0.000161	0.00021	0.000144	0.000141	0.000176	0.000188	0.000205	0.000183	0.000208
2596.19	0.000208	0.000178	0.000164	0.000177	0.000211	0.000149	0.000164	0.000203	0.000185	0.000193	0.000191	0.000205
2598.12	0.000247	0.000214	0.000205	0.000209	0.000202	0.00019	0.000222	0.000238	0.000186	0.000173	0.000197	0.000205
2600.04	0.00027	0.000248	0.000252	0.00023	0.000199	0.00022	0.000259	0.00026	0.000178	0.000171	0.000211	0.000211
2601.97	0.000264	0.000279	0.000267	0.00024	0.00021	0.000238	0.000273	0.000253	0.000169	0.00017	0.000212	0.00022
2603.9	0.000233	0.000293	0.000273	0.000251	0.000233	0.000242	0.000255	0.00024	0.000161	0.000185	0.000216	0.000222
2605.83	0.000195	0.000271	0.000274	0.000247	0.000242	0.00022	0.00022	0.000226	0.000166	0.000195	0.000214	0.000188
2607.76	0.00018	0.000228	0.000247	0.000235	0.000236	0.000209	0.000193	0.000216	0.00018	0.000173	0.000186	0.000154
2609.69	0.000186	0.000185	0.000205	0.000213	0.000225	0.000224	0.000176	0.000214	0.000174	0.000151	0.000148	0.000136
2611.62	0.000203	0.00017	0.000177	0.000189	0.000196	0.000221	0.000173	0.000211	0.000176	0.000145	0.000141	0.000155
2613.55	0.000234	0.000176	0.000181	0.000188	0.000176	0.000203	0.000191	0.000212	0.000182	0.000169	0.000156	0.000191
2615.47	0.000256	0.000207	0.000228	0.000219	0.000194	0.000208	0.00023	0.00022	0.00019	0.000194	0.000186	0.000206
2617.4	0.000278	0.000253	0.000293	0.000257	0.000242	0.000237	0.000263	0.00024	0.000186	0.000212	0.000224	0.000213
2619.33	0.000297	0.000287	0.000315	0.000274	0.000285	0.00026	0.000291	0.000274	0.0002	0.000214	0.000256	0.000232
2621.26	0.000278	0.000311	0.000302	0.000268	0.000307	0.000273	0.000287	0.000281	0.000223	0.000218	0.000279	0.00025
2623.19	0.000253	0.000298	0.000266	0.000248	0.000291	0.000265	0.000253	0.00027	0.00024	0.000239	0.000285	0.000241
2625.12	0.000235	0.000264	0.000225	0.000236	0.000247	0.000249	0.000241	0.000256	0.000266	0.000251	0.000256	0.000241
2627.05	0.000209	0.000225	0.000199	0.000223	0.000219	0.000239	0.000248	0.000232	0.000261	0.000256	0.000199	0.000231
2628.98	0.000218	0.000213	0.000187	0.000225	0.000214	0.000218	0.000249	0.000226	0.000231	0.000238	0.000167	0.000213
2630.91	0.00025	0.000244	0.000211	0.000231	0.000231	0.000201	0.000255	0.000259	0.000192	0.000207	0.000168	0.000208
2632.83	0.000268	0.000281	0.000258	0.000236	0.000253	0.000209	0.00026	0.000308	0.00018	0.000205	0.000207	0.000206
2634.76	0.000298	0.000311	0.000314	0.000261	0.000273	0.000243	0.000239	0.000321	0.000207	0.000247	0.000268	0.000218
2636.69	0.000332	0.000317	0.000337	0.0003	0.000288	0.000292	0.000228	0.000314	0.000269	0.000287	0.00031	0.000249
2638.62	0.000326	0.000299	0.000317	0.000321	0.000295	0.000325	0.00026	0.000302	0.000335	0.000297	0.000305	0.000283
2640.55	0.000302	0.00028	0.00028	0.000295	0.000296	0.000312	0.000275	0.000276	0.00034	0.000279	0.000285	0.000289
2642.48	0.000292	0.000281	0.000238	0.000259	0.000292	0.000267	0.000253	0.00026	0.000292	0.000239	0.000272	0.000271
2644.41	0.00026	0.000285	0.000234	0.000223	0.000282	0.000219	0.00023	0.000253	0.000232	0.000201	0.000249	0.000238
2646.34	0.00023	0.000272	0.000253	0.000201	0.000263	0.000194	0.000211	0.000253	0.000207	0.000203	0.000231	0.000225
2648.26	0.000232	0.000272	0.000275	0.000206	0.000261	0.000203	0.000213	0.000272	0.000229	0.000211	0.000225	0.000219
2650.19	0.00024	0.000278	0.000297	0.000236	0.00026	0.000238	0.000233	0.000307	0.000263	0.000192	0.000219	0.000208
2652.12	0.000274	0.000286	0.000318	0.000272	0.000255	0.000269	0.000257	0.000329	0.00026	0.000191	0.000216	0.00022
2654.05	0.00031	0.000301	0.000319	0.000305	0.000263	0.000291	0.000268	0.000323	0.000236	0.000215	0.000234	0.000234
2655.98	0.000322	0.000308	0.000301	0.000342	0.000284	0.0003	0.000275	0.000301	0.000219	0.000238	0.000255	0.000253
2657.91	0.000314	0.000298	0.000296	0.000359	0.00032	0.00029	0.000291	0.000277	0.000214	0.000268	0.000267	0.000261
2659.84	0.000295	0.000289	0.000308	0.000319	0.000333	0.000278	0.000301	0.000276	0.000217	0.000272	0.000245	0.000252
2661.77	0.000274	0.000286	0.00031	0.000237	0.000315	0.00027	0.000288	0.000262	0.000218	0.00024	0.000211	0.000234
2663.69	0.000263	0.000276	0.000286	0.000194	0.000268	0.000252	0.000247	0.000238	0.000215	0.00023	0.000204	0.000213
2665.62	0.000249	0.000267	0.000253	0.000194	0.000229	0.000237	0.000218	0.000229	0.000215	0.000243	0.000205	0.000207
2667.55	0.00022	0.000257	0.000234	0.00023	0.000217	0.000242	0.000225	0.000246	0.000226	0.000232	0.000223	0.000214
2669.48	0.000223	0.000251	0.00024	0.000295	0.000239	0.000243	0.00027	0.000278	0.000219	0.000201	0.000248	0.000241
2671.41	0.000274	0.000266	0.000268	0.000335	0.000271	0.000239	0.000324	0.000299	0.000208	0.000189	0.000253	0.000265
2673.34	0.000337	0.000283	0.000319	0.000342	0.000279	0.000249	0.00034	0.000309	0.000236	0.000192	0.000241	0.000264
2675.27	0.000359	0.000295	0.000349	0.000316	0.000286	0.000262	0.000323	0.000315	0.000279	0.00021	0.000249	0.00025
2677.2	0.000346	0.000285	0.00033	0.000286	0.000292	0.000281	0.000295	0.000335	0.000306	0.000254	0.000267	0.000236
2679.13	0.000295	0.000276	0.000278	0.000255	0.000286	0.000309	0.000266	0.000326	0.000308	0.000294	0.000274	0.00024
2681.05	0.000222	0.000297	0.000217	0.000212	0.000277	0.000303	0.000245	0.000298	0.000276	0.000313	0.000288	0.000261
2682.98	0.000193	0.000307	0.00018	0.00021	0.000268	0.000265	0.000226	0.00027	0.000249	0.00032	0.000282	0.00027
2684.91	0.000222	0.000304	0.000184	0.000228	0.000261	0.000234	0.000196	0.000259	0.00024	0.000291	0.000265	0.00026
2686.84	0.000262	0.000282	0.000236	0.000231	0.000263	0.000229	0.00019	0.000281	0.000244	0.000215	0.000247	0.00023
2688.77	0.000293	0.000247	0.000295	0.000235	0.00028	0.00023	0.000236	0.000321	0.000245	0.000162	0.000225	0.000225
2690.7	0.000334	0.000257	0.000339	0.00026	0.000295	0.000265	0.000296	0.000357	0.000234	0.000189	0.000229	0.000249
2692.63	0.000332	0.000317	0.00035	0.000295	0.000294	0.000317	0.000327	0.000357	0.000231	0.000253	0.000253	0.00027
2694.56	0.000302	0.000355	0.000347	0.000301	0.000308	0.000321	0.00033	0.00034	0.000246	0.000304	0.000278	0.000284
2696.48	0.000281	0.00035	0.000342	0.000302	0.000337	0.000303	0.000316	0.000321	0.000291	0.000314	0.000283	0.00029
2698.41	0.000273	0.000336	0.000314	0.000298	0.000337	0.000307	0.00029	0.000307	0.000312	0.000275	0.000289	0.000302
2700.34	0.000277	0.000308	0.000293	0.000285	0.000305	0.000307	0.00027	0.000291	0.000302	0.000237	0.000297	0.000299
2702.27	0.000292	0.000276	0.000292	0.000301	0.000282	0.000286	0.000282	0.000278	0.000271	0.00024	0.000285	0.000295
2704.2	0.000324	0.000283	0.000305	0.000324	0.000255	0.000288	0.000307	0.000293	0.000234	0.00025	0.000261	0.0003
2706.13	0.000367	0.000314	0.000321	0.000334	0.00024	0.0003	0.000335	0.000301	0.000242	0.000263	0.000264	0.000301
2708.06	0.000417	0.000338	0.000356	0.000353	0.00029	0.000317	0.000363	0.000321	0.000293	0.000287	0.000298	0.00031
2709.99	0.000437	0.00039	0.000391	0.000391	0.00036	0.000358	0.000383	0.000381	0.000325	0.00033	0.000346	0.000327
2711.92	0.000434	0.000453	0.000412	0.000423	0.000399	0.000386	0.000389	0.00043	0.000332	0.000371	0.00041	0.000346
2713.84	0.000425	0.000475	0.000425	0.000439	0.000413	0.000375	0.000377	0.000435	0.000343	0.000382	0.00042	0.000361
2715.77	0.0004	0.000432	0.000424	0.000408	0.000406	0.000349	0.000356	0.000395	0.000348	0.00038	0.000366	0.000359
2717.7	0.000375	0.000373	0.000411	0.00036	0.000368	0.000339	0.000312	0.000348	0.000336	0.000339	0.000312	0.000334
2719.63	0.000342	0.000337	0.000382	0.00034	0.000322	0.000334	0.000258	0.000316	0.00032	0.000273	0.000296	0.000292
2721.56	0.000293	0.000298	0.000344	0.000334	0.000294	0.000321	0.000233	0.000303	0.000325	0.000231	0.000285	0.000257
2723.49	0.000261	0.000288	0.000294	0.000329	0.000297	0.000288	0.000255	0.000311	0.00033	0.000241	0.000292	0.000254
2725.42	0.000273	0.000322	0.000266	0.0003	0.000325	0.000269	0.000292	0.000309	0.000345	0.000292	0.000319	0.000299
2727.35	0.000304	0.000352	0.000269	0.000283	0.000342	0.000295	0.000304	0.000321	0.000353	0.000337	0.000325	0.000354
2729.27	0.000336	0.000359	0.000302	0.00028	0.000338	0.000329	0.000284	0.000342	0.000329	0.00037	0.000324	0.000353
2731.2	0.00036	0.000358	0.000336	0.000305	0.000314	0.000349	0.000261	0.000359	0.000293	0.000354	0.00032	0.000299
2733.13	0.000359	0.000333	0.000356	0.00031	0.000288	0.000333	0.000268	0.000349	0.000284	0.000297	0.000301	0.000235
2735.06	0.00033	0.000274	0.000355	0.000252	0.00028	0.000276	0.000267	0.0003	0.000307	0.000263	0.000283	0.000199
2736.99	0.000272	0.000229	0.000308	0.000199	0.000292	0.000227	0.000255	0.000259	0.000297	0.000246	0.000266	0.000207
2738.92	0.000222	0.000237	0.000255	0.000184	0.000298	0.000209	0.000249	0.000227	0.000252	0.000216	0.000232	0.000242
2740.85	0.000223	0.000266	0.000222	0.000221	0.000251	0.000187	0.000225	0.000217	0.000209	0.000166	0.00019	0.000262
2742.78	0.000266	0.000284	0.000229	0.00028	0.000208	0.000177	0.000198	0.000233	0.000176	0.000145	0.000172	0.000247
2744.71	0.000299	0.0003	0.000268	0.000322	0.000215	0.000199	0.000211	0.000263	0.000155	0.000137	0.000176	0.000219
2746.63	0.000305	0.000323	0.000318	0.000322	0.000246	0.000237	0.000244	0.000278	0.000194	0.000173	0.000202	0.000215
2748.56	0.000291	0.000328	0.00033	0.000294	0.000286	0.000295	0.000271	0.000277	0.00026	0.00026	0.000259	0.000244
2750.49	0.000285	0.000317	0.000303	0.00029	0.000329	0.00035	0.000323	0.000284	0.000275	0.000304	0.000287	0.000284
2752.42	0.000316	0.000327	0.00028	0.000305	0.000348	0.000344	0.000352	0.000278	0.000254	0.0003	0.000282	0.000304
2754.35	0.000358	0.000306	0.000277	0.000312	0.000325	0.000295	0.000302	0.000269	0.00024	0.000297	0.000286	0.000306
2756.28	0.000359	0.000267	0.00028	0.000322	0.000303	0.000256	0.000221	0.000273	0.000242	0.000279	0.000269	0.000287
2758.21	0.000329	0.00027	0.000283	0.000306	0.000287	0.00023	0.000182	0.000284	0.000256	0.000249	0.000247	0.000259
2760.14	0.000307	0.000296	0.000305	0.000285	0.000283	0.000237	0.000197	0.000286	0.000316	0.000269	0.00026	0.00023
2762.06	0.000303	0.000312	0.000342	0.000292	0.000294	0.000291	0.000247	0.000309	0.000352	0.000294	0.00028	0.000218
2763.99	0.000334	0.000342	0.000388	0.000326	0.000315	0.000351	0.000322	0.000361	0.000341	0.000318	0.00029	0.000252
2765.92	0.000374	0.000396	0.000425	0.000374	0.000349	0.0004	0.000374	0.000396	0.000336	0.000357	0.000332	0.000299
2767.85	0.000406	0.000435	0.000426	0.000419	0.000376	0.00043	0.000384	0.000421	0.000347	0.00037	0.000361	0.000352
2769.78	0.000404	0.000464	0.000381	0.000414	0.000379	0.000401	0.000377	0.000423	0.000369	0.000349	0.000341	0.000382
2771.71	0.000375	0.000453	0.000342	0.000358	0.000383	0.000353	0.000367	0.000386	0.000382	0.000339	0.000333	0.000384
2773.64	0.000362	0.00039	0.000319	0.000322	0.000405	0.00034	0.000347	0.000337	0.000409	0.000372	0.000345	0.000361
2775.57	0.000358	0.000328	0.000327	0.000309	0.000405	0.000345	0.000331	0.000324	0.00042	0.00041	0.000369	0.000366
2777.5	0.000375	0.000321	0.000377	0.000329	0.000398	0.000368	0.00034	0.000343	0.000405	0.000429	0.000411	0.000393
2779.42	0.000405	0.000384	0.000441	0.000383	0.000407	0.0004	0.000362	0.00039	0.0004	0.000403	0.000444	0.000388
2781.35	0.000445	0.000487	0.000501	0.000447	0.000421	0.000422	0.000396	0.000459	0.000408	0.000372	0.000431	0.000386
2783.28	0.00049	0.000557	0.000542	0.0005	0.000438	0.000447	0.000437	0.000495	0.000427	0.00038	0.000412	0.000394
2785.21	0.000529	0.000576	0.000568	0.000554	0.00049	0.000491	0.000471	0.000507	0.00046	0.000423	0.000438	0.000438
2787.14	0.000567	0.000591	0.000556	0.000586	0.000541	0.000525	0.00051	0.000529	0.000507	0.0005	0.000486	0.000515
2789.07	0.000593	0.000589	0.00055	0.000585	0.000552	0.000548	0.000542	0.000542	0.000539	0.000578	0.000525	0.000572
2791	0.000599	0.000573	0.000563	0.000578	0.000554	0.000576	0.000568	0.000524	0.000549	0.000607	0.000558	0.000583
2792.93	0.000606	0.000558	0.000574	0.000559	0.000578	0.00058	0.000593	0.000537	0.000557	0.000584	0.000597	0.00055
2794.85	0.000622	0.000571	0.000572	0.000567	0.000604	0.000576	0.000601	0.000585	0.000563	0.000555	0.000609	0.00051
2796.78	0.000639	0.000606	0.000613	0.000601	0.000631	0.000582	0.000601	0.00063	0.000574	0.000565	0.000593	0.000534
2798.71	0.000662	0.000679	0.0007	0.000645	0.000689	0.000617	0.000624	0.000677	0.000623	0.000635	0.000601	0.00064
2800.64	0.00073	0.000787	0.000779	0.000719	0.000748	0.000693	0.000693	0.000739	0.000706	0.000726	0.000643	0.000743
2802.57	0.00083	0.000871	0.000854	0.00083	0.000792	0.000797	0.000768	0.000809	0.00077	0.000774	0.000711	0.000784
2804.5	0.000905	0.000918	0.000925	0.000908	0.000838	0.000881	0.000851	0.000873	0.00082	0.000787	0.000805	0.000811
2806.43	0.000964	0.000938	0.000949	0.000931	0.000886	0.000923	0.000932	0.000958	0.000899	0.000812	0.000907	0.000841
2808.36	0.001	0.000965	0.000951	0.000935	0.000929	0.000938	0.00098	0.001013	0.000977	0.00089	0.00096	0.000889
2810.28	0.001014	0.00098	0.000988	0.000954	0.000972	0.000949	0.000997	0.001019	0.001027	0.00099	0.000982	0.000954
2812.21	0.001028	0.001015	0.001019	0.001006	0.001014	0.000991	0.001004	0.00102	0.001057	0.001056	0.001045	0.00101
2814.14	0.001069	0.001097	0.001038	0.001079	0.001055	0.00106	0.001032	0.001026	0.001072	0.001089	0.001091	0.001042
2816.07	0.001121	0.001187	0.001095	0.001145	0.001098	0.00113	0.001075	0.001079	0.001111	0.001144	0.001094	0.001083
2818	0.001189	0.001243	0.001212	0.001198	0.001158	0.001195	0.00115	0.001182	0.001184	0.001238	0.00114	0.001181
2819.93	0.001288	0.001299	0.00132	0.001257	0.001236	0.001286	0.001258	0.001284	0.001294	0.001344	0.001242	0.00129
2821.86	0.001398	0.001395	0.001424	0.001327	0.001345	0.001364	0.001363	0.001367	0.001414	0.001459	0.001357	0.001384
2823.79	0.001516	0.001513	0.001533	0.001449	0.001487	0.001454	0.001468	0.001458	0.001523	0.001535	0.001494	0.001474
2825.72	0.001657	0.001655	0.001616	0.001581	0.001621	0.001584	0.001605	0.001598	0.001639	0.001602	0.001654	0.001572
2827.64	0.001811	0.001801	0.001709	0.001721	0.001744	0.00169	0.001748	0.001756	0.001788	0.001739	0.001783	0.001679
2829.57	0.001956	0.001931	0.001879	0.001913	0.001872	0.001822	0.001867	0.001908	0.001965	0.001928	0.001907	0.001825
2831.5	0.002144	0.002103	0.002127	0.002154	0.002054	0.002043	0.002025	0.002102	0.002172	0.002165	0.002113	0.002054
2833.43	0.002438	0.002419	0.002439	0.002468	0.002338	0.002353	0.002314	0.002352	0.002503	0.002508	0.002412	0.002394
2835.36	0.002897	0.002914	0.002885	0.002906	0.002751	0.002781	0.002755	0.002739	0.002996	0.003036	0.002885	0.002897
2837.29	0.003558	0.003588	0.003518	0.003556	0.003373	0.003426	0.003391	0.003339	0.003699	0.003769	0.003603	0.003587
2839.22	0.004481	0.004498	0.004376	0.00446	0.004274	0.00431	0.004284	0.004217	0.004697	0.004745	0.004573	0.004494
2841.15	0.005679	0.005665	0.005497	0.005616	0.005459	0.005436	0.005411	0.005344	0.00597	0.005994	0.005783	0.005663
2843.07	0.006905	0.006902	0.006708	0.006802	0.006705	0.006631	0.006562	0.006498	0.007299	0.007284	0.007039	0.006929
2845	0.007732	0.007731	0.007533	0.007582	0.007423	0.007323	0.007192	0.007213	0.00815	0.008121	0.007883	0.007797
2846.93	0.007649	0.007658	0.007461	0.007511	0.007017	0.006928	0.00678	0.006906	0.007922	0.007952	0.00775	0.007678
2848.86	0.006341	0.006445	0.006215	0.006284	0.005314	0.005293	0.005171	0.005357	0.006364	0.006484	0.006318	0.006255
2850.79	0.004013	0.004182	0.003957	0.004076	0.002722	0.002778	0.002711	0.002886	0.003746	0.003908	0.003774	0.003724
2852.72	0.001341	0.001457	0.001291	0.001449	3.7e-05	0.00015	0.000158	0.000314	0.000781	0.000904	0.000839	0.000826
2854.65	-0.000972	-0.000912	-0.001005	-0.00089	-0.001944	-0.001819	-0.001781	-0.001624	-0.001649	-0.001591	-0.001596	-0.001544
2856.58	-0.002446	-0.002402	-0.002395	-0.002388	-0.002846	-0.002761	-0.002737	-0.002622	-0.00302	-0.003029	-0.002994	-0.002905
2858.51	-0.00286	-0.002893	-0.002776	-0.002856	-0.0028	-0.002792	-0.00277	-0.002686	-0.003333	-0.003377	-0.003284	-0.003218
2860.43	-0.002422	-0.002475	-0.002359	-0.002465	-0.002127	-0.002228	-0.00215	-0.002121	-0.002774	-0.002828	-0.002705	-0.002698
2862.36	-0.001495	-0.001489	-0.001476	-0.001557	-0.001174	-0.001329	-0.001191	-0.001283	-0.001695	-0.001765	-0.001686	-0.001712
2864.29	-0.000445	-0.000441	-0.000453	-0.000484	-0.00026	-0.000385	-0.00025	-0.00037	-0.000582	-0.000633	-0.000622	-0.000666
2866.22	0.000407	0.000388	0.000392	0.000374	0.000391	0.000324	0.000434	0.000383	0.000245	0.000193	0.000186	0.00013
2868.15	0.000832	0.000809	0.000809	0.000778	0.000677	0.000663	0.000682	0.000686	0.00059	0.000571	0.000535	0.000495
2870.08	0.000782	0.000703	0.000737	0.00068	0.000599	0.000626	0.000544	0.00059	0.000451	0.000485	0.000442	0.000386
2872.01	0.000431	0.000295	0.000339	0.000267	0.000311	0.000327	0.000242	0.000316	6.9e-05	9.2e-05	9.1e-05	2.4e-05
2873.94	2.8e-05	-4.4e-05	-6.6e-05	-0.000112	7.8e-05	5.9e-05	1.1e-05	4.9e-05	-0.000224	-0.000226	-0.000228	-0.000241
2875.86	-0.000118	-8.6e-05	-0.000172	-0.000174	9.5e-05	5e-05	4.7e-05	3.8e-05	-0.00021	-0.000259	-0.000304	-0.000231
2877.79	0.000122	0.000172	0.00011	0.000123	0.000381	0.000328	0.000342	0.000332	8.6e-05	2e-06	-3e-06	4.1e-05
2879.72	0.000658	0.000638	0.000666	0.000649	0.000845	0.000793	0.00078	0.000788	0.000589	0.0005	0.000571	0.000512
2881.65	0.001237	0.001196	0.001263	0.001214	0.001351	0.001289	0.001233	0.001292	0.001153	0.0011	0.00118	0.001069
2883.58	0.001691	0.001718	0.001729	0.001681	0.001756	0.001713	0.001667	0.001754	0.001642	0.001661	0.001679	0.001571
2885.51	0.002036	0.002139	0.002031	0.002021	0.002047	0.002048	0.002058	0.002132	0.002031	0.002107	0.002046	0.002011
2887.44	0.002308	0.002408	0.002234	0.002273	0.002279	0.002294	0.002325	0.002389	0.002329	0.002458	0.002307	0.002355
2889.37	0.002508	0.002555	0.002419	0.002487	0.002476	0.002488	0.002465	0.002514	0.002558	0.002673	0.002487	0.002519
2891.3	0.002668	0.002651	0.002599	0.0027	0.002627	0.002645	0.002539	0.002565	0.002708	0.002758	0.002673	0.002597
2893.22	0.002799	0.002754	0.002783	0.002842	0.002723	0.002735	0.002573	0.002643	0.002828	0.0028	0.002812	0.002678
2895.15	0.00285	0.002878	0.002883	0.002862	0.002737	0.002758	0.002624	0.002723	0.002924	0.002833	0.002841	0.002754
2897.08	0.002896	0.002936	0.002882	0.002835	0.002712	0.002769	0.002691	0.002747	0.002969	0.002886	0.002839	0.002831
2899.01	0.002938	0.00296	0.002854	0.002815	0.002707	0.002745	0.002739	0.002755	0.003013	0.002929	0.002892	0.002911
2900.94	0.003005	0.003018	0.002897	0.002902	0.002759	0.002738	0.002773	0.002754	0.003084	0.003044	0.003007	0.00299
2902.87	0.003177	0.003138	0.003054	0.003135	0.002906	0.002875	0.002886	0.002815	0.003285	0.003264	0.003204	0.003171
2904.8	0.003543	0.003431	0.003357	0.003508	0.003158	0.003172	0.003191	0.003043	0.003647	0.003615	0.003557	0.003553
2906.73	0.004158	0.003961	0.003912	0.004065	0.003657	0.003698	0.003723	0.003547	0.004233	0.004229	0.004057	0.004141
2908.65	0.004969	0.004787	0.004712	0.004833	0.004453	0.004469	0.004498	0.00434	0.005105	0.005177	0.004823	0.004991
2910.58	0.005831	0.005754	0.005599	0.005721	0.005345	0.005307	0.005316	0.005153	0.006133	0.006235	0.005831	0.005948
2912.51	0.006395	0.006479	0.006285	0.006382	0.005913	0.005785	0.005763	0.005658	0.006856	0.006897	0.00663	0.006604
2914.44	0.006392	0.006556	0.006411	0.006537	0.00573	0.005559	0.005494	0.005545	0.006859	0.006856	0.00676	0.006666
2916.37	0.005768	0.005904	0.00574	0.005983	0.00463	0.004556	0.004476	0.00465	0.006025	0.006032	0.00602	0.005962
2918.3	0.004537	0.00469	0.004406	0.004721	0.002901	0.002983	0.002935	0.003117	0.004447	0.004528	0.004518	0.004558
2920.23	0.002872	0.003019	0.0027	0.003005	0.000989	0.001196	0.001141	0.001298	0.002478	0.002619	0.002547	0.002696
2922.16	0.000967	0.001099	0.000906	0.001071	-0.000779	-0.000551	-0.00059	-0.000497	0.00048	0.000575	0.000469	0.00066
2924.09	-0.000978	-0.000891	-0.000835	-0.000809	-0.002252	-0.002131	-0.00213	-0.002133	-0.00138	-0.001453	-0.00151	-0.001374
2926.01	-0.002727	-0.002686	-0.002462	-0.002531	-0.003491	-0.003484	-0.003446	-0.003442	-0.003118	-0.003309	-0.003266	-0.003191
2927.94	-0.004112	-0.004084	-0.003907	-0.004026	-0.004469	-0.004573	-0.004495	-0.004423	-0.004553	-0.004746	-0.004666	-0.004592
2929.87	-0.005073	-0.005096	-0.005045	-0.005233	-0.005154	-0.005318	-0.005247	-0.005159	-0.005591	-0.005675	-0.005652	-0.005616
2931.8	-0.005775	-0.005816	-0.005831	-0.006054	-0.005574	-0.005736	-0.005684	-0.005653	-0.006283	-0.006325	-0.00626	-0.006273
2933.73	-0.00623	-0.006325	-0.006256	-0.006429	-0.005761	-0.005921	-0.005837	-0.005877	-0.006673	-0.006738	-0.006554	-0.0066
2935.66	-0.006401	-0.006587	-0.006313	-0.006451	-0.005717	-0.00588	-0.005701	-0.005803	-0.00674	-0.006844	-0.006569	-0.006613
2937.59	-0.006288	-0.00645	-0.006067	-0.006147	-0.005464	-0.005549	-0.005369	-0.005505	-0.00646	-0.006602	-0.006297	-0.006282
2939.52	-0.005841	-0.005857	-0.005575	-0.005653	-0.00501	-0.004956	-0.004879	-0.005018	-0.005901	-0.005978	-0.005744	-0.005658
2941.44	-0.005116	-0.005007	-0.004881	-0.004996	-0.004318	-0.004262	-0.004282	-0.004385	-0.005085	-0.00508	-0.004971	-0.004866
2943.37	-0.004205	-0.004073	-0.004037	-0.004154	-0.003524	-0.003532	-0.003641	-0.003652	-0.004083	-0.004035	-0.004048	-0.003968
2945.3	-0.003158	-0.003085	-0.003126	-0.003178	-0.002716	-0.002813	-0.002894	-0.002802	-0.002957	-0.002988	-0.003034	-0.002972
2947.23	-0.002064	-0.0021	-0.00215	-0.002191	-0.001939	-0.002091	-0.002091	-0.001922	-0.001862	-0.001996	-0.001986	-0.001972
2949.16	-0.001172	-0.001261	-0.00122	-0.001319	-0.001317	-0.001388	-0.001351	-0.001214	-0.000945	-0.001166	-0.001059	-0.001064
2951.09	-0.000627	-0.000655	-0.000552	-0.000693	-0.000926	-0.000854	-0.000814	-0.00081	-0.000374	-0.000588	-0.000466	-0.000418
2953.02	-0.000443	-0.000427	-0.000334	-0.000502	-0.000802	-0.000653	-0.000627	-0.000712	-0.000287	-0.000375	-0.000281	-0.000221
2954.95	-0.000644	-0.000617	-0.000569	-0.0007	-0.000896	-0.000793	-0.000809	-0.000873	-0.000556	-0.00057	-0.000501	-0.000447
2956.87	-0.00114	-0.00111	-0.001076	-0.001153	-0.001179	-0.001161	-0.001248	-0.001209	-0.001041	-0.001056	-0.001021	-0.000951
2958.8	-0.001775	-0.001755	-0.001733	-0.001753	-0.001586	-0.00167	-0.001768	-0.001616	-0.001702	-0.001746	-0.001655	-0.001632
2960.73	-0.002499	-0.002471	-0.002422	-0.002426	-0.002078	-0.002217	-0.002267	-0.002112	-0.002433	-0.002512	-0.002335	-0.00237
2962.66	-0.003262	-0.003234	-0.003076	-0.00314	-0.002609	-0.002739	-0.002679	-0.002662	-0.003156	-0.003242	-0.00305	-0.003057
2964.59	-0.003897	-0.003931	-0.003691	-0.003859	-0.003124	-0.0032	-0.003056	-0.003123	-0.003839	-0.003861	-0.003754	-0.003677
2966.52	-0.004328	-0.004416	-0.004212	-0.00442	-0.003502	-0.00351	-0.003394	-0.003433	-0.004353	-0.004356	-0.004306	-0.004161
2968.45	-0.004553	-0.004624	-0.004534	-0.004654	-0.003636	-0.003632	-0.00357	-0.003579	-0.004607	-0.004642	-0.00456	-0.004429
2970.38	-0.004547	-0.004573	-0.004564	-0.004573	-0.003571	-0.003615	-0.003559	-0.003548	-0.004623	-0.00465	-0.004484	-0.004447
2972.31	-0.00432	-0.004329	-0.004361	-0.004289	-0.003335	-0.003462	-0.003393	-0.003375	-0.00442	-0.004454	-0.004186	-0.004228
2974.23	-0.003987	-0.00399	-0.003984	-0.003894	-0.003021	-0.003174	-0.003094	-0.003133	-0.004038	-0.004091	-0.003788	-0.00384
2976.16	-0.003634	-0.003625	-0.003513	-0.003506	-0.002698	-0.002798	-0.002738	-0.002798	-0.003605	-0.003646	-0.003368	-0.003353
2978.09	-0.003281	-0.003265	-0.003073	-0.003209	-0.002391	-0.002428	-0.002456	-0.002443	-0.003161	-0.003207	-0.002995	-0.00288
2980.02	-0.002956	-0.002893	-0.002718	-0.002945	-0.002136	-0.002136	-0.002207	-0.002185	-0.002746	-0.002797	-0.002693	-0.002528
2981.95	-0.002631	-0.002567	-0.002454	-0.002671	-0.001923	-0.001908	-0.001984	-0.002004	-0.002413	-0.002452	-0.002398	-0.002297
2983.88	-0.002313	-0.002268	-0.002205	-0.002342	-0.001749	-0.001721	-0.001785	-0.001819	-0.002166	-0.002164	-0.002106	-0.002093
2985.81	-0.001969	-0.001969	-0.001918	-0.001966	-0.001569	-0.00152	-0.001547	-0.001601	-0.001956	-0.001946	-0.001829	-0.001859
2987.74	-0.001618	-0.001655	-0.001614	-0.001573	-0.001316	-0.00128	-0.001261	-0.001318	-0.001673	-0.001708	-0.001521	-0.001571
2989.66	-0.001303	-0.001332	-0.001283	-0.001222	-0.000994	-0.001021	-0.000992	-0.000986	-0.001313	-0.001389	-0.001206	-0.001256
2991.59	-0.000975	-0.001006	-0.000942	-0.000908	-0.000676	-0.00076	-0.000776	-0.000706	-0.000939	-0.001005	-0.00088	-0.000926
2993.52	-0.000603	-0.000663	-0.000578	-0.000594	-0.000433	-0.000467	-0.000524	-0.000443	-0.000594	-0.000565	-0.00055	-0.000563
2995.45	-0.000188	-0.000295	-0.000212	-0.000261	-0.000219	-0.000148	-0.000221	-0.000132	-0.000234	-0.000159	-0.000175	-0.000153
2997.38	0.000225	0.000141	0.000194	0.000147	6.2e-05	0.000134	0.000105	0.000197	0.000192	0.000248	0.000255	0.000288
2999.31	0.000611	0.000572	0.000617	0.000524	0.000408	0.000419	0.000463	0.000504	0.000694	0.00066	0.000663	0.000699
3001.24	0.000956	0.000959	0.000966	0.000863	0.00076	0.000697	0.000795	0.0008	0.001176	0.001029	0.001025	0.001029
3003.17	0.001211	0.001287	0.001245	0.001167	0.001031	0.000907	0.00103	0.001023	0.001464	0.001313	0.001282	0.001244
3005.1	0.001344	0.00146	0.001385	0.00134	0.001139	0.001059	0.001113	0.001096	0.001521	0.0014	0.001377	0.001309
3007.02	0.001264	0.001354	0.00131	0.001293	0.001005	0.00102	0.000983	0.000999	0.001298	0.001236	0.001205	0.00115
3008.95	0.000969	0.000957	0.000961	0.000991	0.000667	0.000726	0.000641	0.0007	0.000815	0.000801	0.000784	0.000771
3010.88	0.000419	0.000336	0.000389	0.000459	0.000242	0.000249	0.000169	0.000199	0.000199	0.000208	0.000206	0.000244
3012.81	-0.000247	-0.000324	-0.000228	-0.000204	-0.000202	-0.00027	-0.00027	-0.000303	-0.00044	-0.000391	-0.000383	-0.000333
3014.74	-0.000716	-0.000776	-0.000714	-0.000722	-0.00053	-0.000635	-0.000542	-0.000578	-0.000907	-0.000849	-0.000792	-0.000776
3016.67	-0.000942	-0.000922	-0.000943	-0.000997	-0.000631	-0.000724	-0.000644	-0.000633	-0.001053	-0.001059	-0.000983	-0.000972
3018.6	-0.000897	-0.000863	-0.000904	-0.001014	-0.000554	-0.000565	-0.000597	-0.000543	-0.000941	-0.001024	-0.000971	-0.000976
3020.53	-0.000696	-0.000694	-0.000711	-0.000824	-0.000378	-0.000354	-0.000436	-0.00037	-0.000733	-0.000825	-0.000809	-0.000812
3022.45	-0.000414	-0.000394	-0.000443	-0.000513	-0.000117	-0.000127	-0.000197	-0.000171	-0.000481	-0.000543	-0.000513	-0.000512
3024.38	-0.0001	-7.1e-05	-0.000134	-0.00013	0.000159	0.000105	8.6e-05	5.9e-05	-0.000196	-0.000219	-0.000171	-0.000207
3026.31	0.000193	0.00017	0.000191	0.000211	0.000331	0.000283	0.000321	0.000305	1.9e-05	3.3e-05	5.8e-05	1.4e-05
3028.24	0.000421	0.00031	0.00042	0.000413	0.000411	0.000415	0.000447	0.000471	0.000171	0.000149	0.00015	0.000149
3030.17	0.000473	0.000403	0.000478	0.000439	0.000442	0.000492	0.000467	0.000547	0.000307	0.000192	0.000194	0.000239
3032.1	0.000475	0.000486	0.0005	0.000423	0.000457	0.000534	0.000494	0.000598	0.000379	0.000255	0.000262	0.000304
3034.03	0.000493	0.000585	0.000549	0.000468	0.000535	0.000558	0.000558	0.000596	0.000405	0.000341	0.000375	0.00037
3035.96	0.000591	0.000693	0.000637	0.000593	0.000635	0.000621	0.000625	0.000593	0.000491	0.000465	0.000501	0.000444
3037.89	0.000738	0.000701	0.000714	0.000671	0.000681	0.000658	0.000671	0.000608	0.000572	0.000571	0.000547	0.000506
3039.81	0.00083	0.000623	0.000746	0.000692	0.000689	0.000611	0.000655	0.000609	0.000561	0.000593	0.000532	0.000545
3041.74	0.000847	0.00059	0.000705	0.000697	0.000739	0.000594	0.000625	0.000643	0.000604	0.0006	0.000577	0.000591
3043.67	0.000777	0.000637	0.000645	0.000619	0.000788	0.00063	0.000633	0.000707	0.000699	0.000623	0.000629	0.000631
3045.6	0.000736	0.000729	0.000713	0.000621	0.000779	0.000677	0.000711	0.000725	0.000739	0.000653	0.000624	0.000608
3047.53	0.000759	0.00087	0.000811	0.000754	0.000773	0.00074	0.000822	0.000735	0.000733	0.000676	0.000619	0.000591
3049.46	0.00082	0.000975	0.000864	0.000888	0.000773	0.000812	0.000904	0.000805	0.000721	0.000725	0.000629	0.00063
3051.39	0.000861	0.00095	0.000894	0.000922	0.000809	0.000843	0.000891	0.00087	0.000694	0.000758	0.000682	0.000675
3053.32	0.000864	0.000859	0.000901	0.00091	0.000871	0.000862	0.000822	0.000898	0.000722	0.000783	0.000773	0.000725
3055.24	0.000847	0.000817	0.000844	0.000838	0.000904	0.000885	0.000764	0.000863	0.000839	0.000788	0.000839	0.000759
3057.17	0.000873	0.000811	0.000792	0.000757	0.000875	0.000859	0.000726	0.000794	0.000914	0.000764	0.000806	0.000742
3059.1	0.000921	0.000829	0.000813	0.000782	0.000795	0.000763	0.000735	0.000765	0.000892	0.00071	0.000697	0.000717
3061.03	0.000877	0.000793	0.00079	0.000811	0.000735	0.000648	0.000725	0.000773	0.000734	0.000601	0.000571	0.000661
3062.96	0.000746	0.000648	0.000698	0.00071	0.000655	0.000579	0.00066	0.000704	0.000518	0.000498	0.000449	0.000527
3064.89	0.000573	0.000518	0.000591	0.000545	0.000571	0.000544	0.000573	0.000606	0.000387	0.00043	0.000406	0.000407
3066.82	0.000482	0.000481	0.00051	0.000443	0.000533	0.00053	0.000509	0.000554	0.000386	0.000452	0.000425	0.000371
3068.75	0.000527	0.000538	0.000512	0.000458	0.000562	0.000562	0.000513	0.000533	0.000456	0.00048	0.000481	0.000405
3070.68	0.000666	0.000658	0.000636	0.00058	0.000671	0.000641	0.000598	0.000616	0.000528	0.000509	0.000513	0.0005
3072.6	0.000775	0.000737	0.000763	0.000722	0.000762	0.000687	0.000747	0.00071	0.000573	0.000514	0.000512	0.000573
3074.53	0.000768	0.0007	0.000747	0.000767	0.00077	0.000658	0.000816	0.000722	0.000506	0.000471	0.000507	0.000547
3076.46	0.00069	0.000608	0.000626	0.000643	0.000669	0.000611	0.000746	0.000663	0.000439	0.000451	0.000458	0.000462
3078.39	0.000551	0.000507	0.00051	0.000486	0.00054	0.000578	0.000594	0.00059	0.000429	0.000419	0.000399	0.000397
3080.32	0.00043	0.000447	0.00045	0.000378	0.00048	0.00056	0.000435	0.000491	0.000424	0.000367	0.000342	0.000337
3082.25	0.000381	0.000488	0.000442	0.000347	0.000468	0.000555	0.000388	0.000385	0.0004	0.000309	0.000328	0.000301
3084.18	0.00041	0.000572	0.000498	0.00043	0.000536	0.000566	0.000473	0.00038	0.000407	0.000341	0.000354	0.000308
3086.11	0.00048	0.000605	0.000546	0.000527	0.000639	0.000546	0.000563	0.000463	0.000458	0.000408	0.000424	0.000355
3088.03	0.000564	0.00061	0.000552	0.000564	0.000707	0.000532	0.00061	0.000632	0.000497	0.000469	0.000487	0.000416
3089.96	0.000641	0.000564	0.000557	0.000565	0.000711	0.000571	0.000626	0.000734	0.000545	0.000531	0.000479	0.000445
3091.89	0.000684	0.000523	0.00058	0.000572	0.000702	0.000631	0.000603	0.000689	0.00054	0.000534	0.000463	0.000472
3093.82	0.000735	0.000567	0.000604	0.000595	0.000701	0.00071	0.000604	0.000642	0.000534	0.000525	0.0005	0.00049
3095.75	0.000664	0.000578	0.000573	0.000542	0.000672	0.000718	0.000624	0.000581	0.000558	0.000531	0.00053	0.000472
3097.68	0.000507	0.000541	0.000531	0.00047	0.00067	0.000686	0.000593	0.000526	0.00055	0.000532	0.000534	0.000453
3099.61	0.000452	0.000566	0.000549	0.00047	0.000645	0.000687	0.000579	0.000549	0.00056	0.000506	0.00051	0.000481
3101.54	0.000513	0.000696	0.00064	0.000564	0.000615	0.000666	0.000642	0.000596	0.000556	0.000506	0.000456	0.000493
3103.46	0.000662	0.000802	0.000732	0.000686	0.000637	0.000626	0.000725	0.000625	0.000535	0.000555	0.000416	0.000468
3105.39	0.000867	0.00086	0.000773	0.000785	0.000696	0.000639	0.000788	0.000726	0.00054	0.000628	0.000456	0.000495
3107.32	0.001027	0.000864	0.00085	0.000887	0.000825	0.000739	0.000883	0.000878	0.000639	0.000708	0.000581	0.000589
3109.25	0.001017	0.000813	0.000917	0.000917	0.000975	0.000855	0.000943	0.000928	0.000759	0.000753	0.00071	0.000705
3111.18	0.000959	0.000831	0.000908	0.000928	0.001042	0.000969	0.000922	0.000921	0.000819	0.000732	0.000804	0.000801
3113.11	0.000931	0.000905	0.000916	0.000904	0.000997	0.001021	0.000914	0.000896	0.000834	0.000698	0.000831	0.000796
3115.04	0.000892	0.000909	0.000897	0.000844	0.000904	0.00099	0.000874	0.000874	0.000823	0.000712	0.000832	0.000711
3116.97	0.000852	0.000823	0.000802	0.000737	0.000811	0.000957	0.000792	0.000893	0.000824	0.00077	0.000812	0.000641
3118.9	0.000819	0.000798	0.000782	0.000615	0.000796	0.000863	0.000723	0.000884	0.000819	0.0008	0.000809	0.000657
3120.82	0.000838	0.00087	0.00088	0.000631	0.000888	0.000767	0.000754	0.000829	0.000841	0.000813	0.000817	0.000746
3122.75	0.000873	0.000918	0.000931	0.000747	0.000915	0.000749	0.000834	0.000783	0.00084	0.000841	0.000774	0.000788
3124.68	0.000969	0.001005	0.000978	0.000965	0.00097	0.000823	0.000939	0.000843	0.000881	0.000877	0.000772	0.000786
3126.61	0.001135	0.001113	0.001094	0.001188	0.001121	0.000937	0.001091	0.00098	0.001015	0.000952	0.000847	0.000829
3128.54	0.001253	0.001137	0.001151	0.001311	0.001209	0.001064	0.001146	0.0011	0.001127	0.001011	0.000918	0.000932
3130.47	0.00131	0.001204	0.001187	0.001284	0.001216	0.001163	0.001122	0.001161	0.001146	0.00103	0.000956	0.000977
3132.4	0.00134	0.001274	0.001254	0.001191	0.001205	0.001198	0.001103	0.001163	0.001094	0.001038	0.001017	0.000998
3134.33	0.001302	0.00125	0.001237	0.001147	0.001139	0.001219	0.001078	0.001133	0.001045	0.00104	0.001042	0.001023
3136.25	0.001206	0.001186	0.001203	0.001102	0.001074	0.001223	0.001053	0.0011	0.001022	0.00103	0.001015	0.000984
3138.18	0.001164	0.001182	0.001167	0.001076	0.001115	0.001194	0.001059	0.001096	0.001096	0.001023	0.001027	0.000975
3140.11	0.001163	0.001179	0.001093	0.001048	0.001143	0.001118	0.00104	0.001096	0.001165	0.001055	0.001034	0.000992
3142.04	0.001182	0.001159	0.001123	0.001105	0.001115	0.001104	0.000997	0.001104	0.001168	0.001081	0.001016	0.000998
3143.97	0.001306	0.001283	0.0013	0.001301	0.00115	0.001172	0.001076	0.001156	0.001222	0.001098	0.001054	0.001013
3145.9	0.001449	0.001428	0.001461	0.001465	0.001243	0.001242	0.001245	0.001223	0.001266	0.001121	0.001142	0.001055
3147.83	0.001493	0.001487	0.001489	0.001465	0.001336	0.001279	0.001398	0.001279	0.001301	0.001176	0.001182	0.001109
3149.76	0.001435	0.001449	0.001447	0.001376	0.001411	0.001307	0.001463	0.001326	0.001349	0.001286	0.001182	0.001119
3151.69	0.001337	0.001324	0.001364	0.001285	0.001379	0.001334	0.001397	0.001312	0.001338	0.001383	0.00121	0.001163
3153.61	0.001286	0.001244	0.001301	0.001256	0.001306	0.001313	0.001294	0.001283	0.001312	0.00142	0.001231	0.001225
3155.54	0.001317	0.001311	0.001342	0.001307	0.00129	0.001247	0.00126	0.001235	0.001338	0.001365	0.001229	0.001236
3157.47	0.001386	0.001418	0.00139	0.001333	0.001283	0.001189	0.001267	0.001195	0.001358	0.001261	0.001218	0.001197
3159.4	0.001431	0.001477	0.00133	0.001309	0.001285	0.001197	0.001225	0.001221	0.001317	0.00119	0.001218	0.00119
3161.33	0.001449	0.001489	0.001216	0.001327	0.001343	0.001278	0.001198	0.00128	0.001304	0.001175	0.001217	0.001258
3163.26	0.001451	0.001459	0.001247	0.001427	0.001405	0.001347	0.00123	0.001314	0.001329	0.001204	0.001199	0.001307
3165.19	0.001581	0.001436	0.001424	0.001485	0.001415	0.001413	0.0013	0.001314	0.001348	0.001297	0.001211	0.001313
3167.12	0.001755	0.001533	0.00159	0.001494	0.001484	0.001438	0.001392	0.00131	0.001413	0.001412	0.001275	0.00127
3169.04	0.001784	0.001653	0.001704	0.001504	0.001566	0.001442	0.001436	0.001345	0.001497	0.001502	0.001399	0.001221
3170.97	0.001688	0.001657	0.001748	0.001482	0.001521	0.001482	0.001416	0.001477	0.001532	0.001587	0.001508	0.001244
3172.9	0.001549	0.001595	0.00167	0.001448	0.001455	0.001431	0.001358	0.001564	0.001532	0.001589	0.001507	0.0013
3174.83	0.001424	0.001483	0.001518	0.001402	0.001419	0.001353	0.001337	0.001541	0.001496	0.001481	0.001395	0.001309
3176.76	0.001384	0.001455	0.001462	0.001375	0.001408	0.00132	0.001346	0.001437	0.001402	0.001373	0.001294	0.001292
3178.69	0.001458	0.00153	0.001476	0.001409	0.001432	0.00138	0.001359	0.001258	0.001314	0.001303	0.001262	0.001275
3180.62	0.001485	0.001577	0.001466	0.001475	0.001458	0.00144	0.001375	0.001172	0.001268	0.001227	0.001266	0.001239
3182.55	0.001538	0.001578	0.001498	0.001577	0.001448	0.001512	0.001425	0.001289	0.001331	0.001234	0.001288	0.001222
3184.48	0.001659	0.001579	0.001576	0.001599	0.001477	0.00157	0.001525	0.001455	0.001472	0.001335	0.001301	0.001261
3186.4	0.001701	0.001546	0.001552	0.001567	0.00155	0.001487	0.001535	0.00156	0.001586	0.001408	0.001301	0.001278
3188.33	0.001674	0.001551	0.001519	0.001595	0.001541	0.001445	0.001473	0.001602	0.001619	0.001489	0.001351	0.001314
3190.26	0.001683	0.001667	0.001633	0.001662	0.001511	0.001475	0.001386	0.0016	0.001613	0.001584	0.001443	0.001447
3192.19	0.001621	0.001598	0.001622	0.001633	0.001476	0.001492	0.001297	0.001547	0.001643	0.001569	0.001444	0.00152
3194.12	0.001486	0.001425	0.00147	0.001482	0.00141	0.001458	0.001284	0.001486	0.001624	0.00151	0.001406	0.001456
3196.05	0.001443	0.001434	0.001438	0.001364	0.00139	0.001445	0.001371	0.001369	0.00156	0.001498	0.001393	0.001379
3197.98	0.001473	0.001498	0.00144	0.001338	0.00141	0.001422	0.001473	0.001282	0.001452	0.001431	0.00134	0.001289
3199.91	0.001535	0.001574	0.001433	0.001472	0.001399	0.001378	0.001519	0.001281	0.001317	0.001334	0.001277	0.001176
3201.83	0.00171	0.001737	0.001553	0.001648	0.001447	0.001455	0.001552	0.001393	0.00129	0.001343	0.00133	0.001188
3203.76	0.001856	0.001787	0.001655	0.001703	0.001572	0.001562	0.00158	0.001541	0.001406	0.00136	0.001442	0.001304
3205.69	0.001717	0.001574	0.001643	0.001597	0.001641	0.001597	0.001615	0.001536	0.001588	0.001372	0.001508	0.001422
3207.62	0.001547	0.001487	0.001727	0.001517	0.001674	0.001642	0.001671	0.001528	0.0017	0.001509	0.001605	0.001547
3209.55	0.001484	0.001527	0.001783	0.001462	0.001664	0.001665	0.001581	0.001551	0.001659	0.001612	0.00162	0.00161
3211.48	0.001588	0.001599	0.001733	0.001466	0.001673	0.00165	0.001463	0.001614	0.001599	0.001638	0.001514	0.00159
3213.41	0.001729	0.001731	0.001734	0.001547	0.00174	0.001628	0.001439	0.001645	0.001583	0.001674	0.00141	0.001472
3215.34	0.001747	0.001768	0.001699	0.001556	0.001752	0.001569	0.001411	0.001639	0.001582	0.001664	0.001366	0.001322
3217.27	0.00165	0.001681	0.001569	0.001547	0.001664	0.001544	0.001426	0.001564	0.001561	0.00158	0.001406	0.001239
3219.19	0.001565	0.00167	0.001498	0.00159	0.00155	0.001627	0.001516	0.001501	0.00158	0.001572	0.001538	0.001293
3221.12	0.001683	0.001839	0.001576	0.001714	0.001537	0.001734	0.001643	0.001603	0.001609	0.001644	0.001704	0.001484
3223.05	0.001901	0.001961	0.001735	0.001824	0.00158	0.001799	0.001735	0.001691	0.001624	0.001687	0.001818	0.001678
3224.98	0.002215	0.002093	0.00196	0.002018	0.001773	0.001909	0.001891	0.001811	0.001785	0.001756	0.001892	0.001804
3226.91	0.002386	0.002159	0.002063	0.002201	0.001937	0.001987	0.002012	0.001961	0.001918	0.001818	0.001878	0.001813
3228.84	0.002375	0.002087	0.002038	0.002237	0.001992	0.001995	0.002011	0.002024	0.001977	0.001954	0.001853	0.001782
3230.77	0.002233	0.002018	0.002041	0.002195	0.002039	0.002023	0.002023	0.001952	0.002044	0.002094	0.001906	0.001793
3232.7	0.001978	0.002016	0.002081	0.002039	0.002088	0.001996	0.002053	0.001847	0.002113	0.002144	0.001959	0.001859
3234.62	0.001771	0.002015	0.002133	0.001835	0.002145	0.001864	0.002028	0.001826	0.002187	0.002123	0.001981	0.001933
3236.55	0.00186	0.002105	0.002144	0.001835	0.002192	0.001823	0.002016	0.001874	0.002247	0.002096	0.002064	0.002008
3238.48	0.002264	0.002375	0.002175	0.002113	0.002296	0.001952	0.002059	0.002097	0.002345	0.002166	0.002148	0.002112
3240.41	0.002554	0.002515	0.002256	0.002425	0.002265	0.002078	0.00214	0.002376	0.002334	0.002283	0.002146	0.002171
3242.34	0.002642	0.002527	0.00245	0.002643	0.002233	0.002269	0.002299	0.002427	0.002316	0.002437	0.002267	0.002215
3244.27	0.002582	0.002525	0.002584	0.002676	0.002285	0.002471	0.002439	0.002372	0.002418	0.002519	0.002496	0.002335
3246.2	0.002657	0.002634	0.002702	0.002659	0.002426	0.002673	0.002563	0.00251	0.002616	0.002662	0.002733	0.002541
3248.13	0.002857	0.002818	0.002939	0.002704	0.002663	0.002856	0.002648	0.002726	0.002823	0.0029	0.002932	0.002765
3250.05	0.003059	0.00309	0.003125	0.00287	0.002887	0.002965	0.002707	0.002918	0.002969	0.003109	0.003021	0.002932
3251.98	0.003066	0.003294	0.003127	0.003069	0.002975	0.003	0.002771	0.00305	0.003092	0.003255	0.002989	0.00295
3253.91	0.002845	0.003231	0.002998	0.00301	0.002842	0.002906	0.00284	0.003022	0.003149	0.003229	0.002937	0.002896
3255.84	0.002829	0.003155	0.002914	0.002863	0.002734	0.002872	0.002861	0.002879	0.003157	0.003171	0.002986	0.002928
3257.77	0.003068	0.003172	0.002954	0.002916	0.002748	0.00292	0.002896	0.002867	0.003169	0.003202	0.003061	0.002989
3259.7	0.003396	0.003273	0.003128	0.003187	0.002876	0.003029	0.003028	0.002987	0.003187	0.003221	0.00318	0.003075
3261.63	0.003556	0.003319	0.003244	0.00337	0.003075	0.003084	0.003043	0.002994	0.003091	0.00312	0.003308	0.003108
3263.56	0.003491	0.003292	0.003216	0.003467	0.003178	0.003035	0.003026	0.003006	0.002997	0.003019	0.003262	0.003108
3265.49	0.003312	0.003209	0.003176	0.003458	0.003126	0.003014	0.003075	0.002975	0.002981	0.002998	0.003094	0.003091
3267.41	0.00314	0.003077	0.0031	0.003165	0.00295	0.002877	0.002946	0.002871	0.002943	0.002977	0.002872	0.002989
3269.34	0.002883	0.002839	0.002847	0.0028	0.002661	0.002623	0.002577	0.002734	0.002719	0.002897	0.002566	0.002744
3271.27	0.002358	0.002569	0.002435	0.002405	0.002185	0.002231	0.002167	0.002448	0.002397	0.002633	0.00224	0.002364
3273.2	0.001759	0.002146	0.001936	0.001875	0.001627	0.001777	0.001739	0.00196	0.00208	0.002122	0.001965	0.002015
3275.13	0.00139	0.001614	0.001483	0.001424	0.001272	0.001473	0.001373	0.00151	0.001688	0.001658	0.001739	0.001714
3277.06	0.001214	0.001299	0.001238	0.00121	0.001182	0.001309	0.001237	0.001312	0.001358	0.00143	0.001494	0.001484
3278.99	0.001156	0.001132	0.001167	0.000993	0.001196	0.0013	0.0012	0.001178	0.001157	0.001285	0.001298	0.001257
3280.92	0.001187	0.001056	0.001147	0.000878	0.001181	0.001263	0.001071	0.001095	0.001058	0.001162	0.001169	0.001082
3282.84	0.001133	0.001066	0.00111	0.00094	0.001075	0.001102	0.000909	0.001063	0.000983	0.001006	0.001052	0.001019
3284.77	0.001044	0.001222	0.001154	0.00106	0.000891	0.000939	0.000818	0.001041	0.00102	0.00093	0.000969	0.00098
3286.7	0.000961	0.00121	0.001086	0.001115	0.000721	0.000857	0.000741	0.000937	0.001027	0.000866	0.000899	0.000912
3288.63	0.000801	0.00094	0.000744	0.000979	0.000673	0.000721	0.000631	0.000755	0.000791	0.000746	0.000769	0.000732
3290.56	0.000575	0.000672	0.000436	0.000736	0.000677	0.000501	0.000515	0.00056	0.000479	0.000598	0.000564	0.000503
3292.49	0.000263	0.000198	0.000182	0.000333	0.000523	0.000326	0.000336	0.00028	0.000265	0.000417	0.000311	0.000296
3294.42	4.7e-05	-0.000191	-3.1e-05	-1e-06	0.000319	0.000169	0.000159	6e-05	0.000121	0.000287	0.000178	0.00023
3296.35	1.3e-05	-0.000108	4e-06	-6.6e-05	0.000209	8.8e-05	9.7e-05	4.6e-05	3.3e-05	0.000212	0.000258	0.00023
3298.28	-5.8e-05	0.000115	0.000145	4e-06	8.9e-05	0.000143	0.000118	0.000143	1.2e-05	0.000214	0.000326	0.000178
3300.2	-9.3e-05	0.000199	0.000212	0.00011	-8e-06	0.000202	0.000182	0.000215	2e-06	0.000152	0.000373	0.000123
3302.13	0.000101	0.000227	0.000201	0.000227	9.9e-05	0.000251	0.000248	0.000356	4.2e-05	8.2e-05	0.000367	0.0001
3304.06	0.000157	0.000165	-3e-06	0.000185	0.000147	0.000214	0.000145	0.000372	8.3e-05	-2.8e-05	0.000149	6.2e-05
3305.99	-6.8e-05	-9.8e-05	-0.000309	-0.000185	8.7e-05	0.000179	-7.6e-05	0.000131	1.5e-05	-9.7e-05	-3e-05	7e-06
3307.92	-0.000327	-0.00035	-0.000507	-0.000557	8.3e-05	1.3e-05	-0.000171	-0.000152	-0.000148	-9.7e-05	-0.000107	-5.5e-05
3309.85	-0.000554	-0.000394	-0.000531	-0.000629	4e-06	-0.000179	-0.00018	-0.000264	-0.000209	-0.000126	-0.000181	-0.000191
3311.78	-0.000722	-0.000374	-0.000449	-0.000512	-9.7e-05	-0.00013	-0.000106	-0.000167	-0.000203	-0.000121	-0.000195	-0.000225
3313.71	-0.000466	-0.000199	-0.00016	-0.000251	-3.8e-05	2e-06	0.000123	9.1e-05	-0.000138	-3.5e-05	-5.2e-05	-8.6e-05
3315.63	4.7e-05	2.2e-05	0.000146	5.9e-05	0.000165	0.00027	0.000365	0.000458	-1.8e-05	6.2e-05	8.1e-05	5.4e-05
3317.56	0.000403	0.000265	0.000337	0.000274	0.000447	0.000595	0.00053	0.000711	0.00011	0.000219	0.000228	0.000176
3319.49	0.00077	0.000508	0.000668	0.000515	0.000941	0.000923	0.000812	0.000979	0.000338	0.000464	0.000608	0.000439
3321.42	0.000953	0.000648	0.000916	0.000706	0.00139	0.001051	0.001129	0.001213	0.000633	0.000629	0.000863	0.0007
3323.35	0.000917	0.000934	0.001034	0.00082	0.0015	0.00118	0.00134	0.0013	0.000936	0.000753	0.000985	0.000853
3325.28	0.000774	0.001119	0.001033	0.000931	0.00143	0.001258	0.001558	0.001348	0.001001	0.000918	0.001091	0.001045
3327.21	0.000749	0.00103	0.00094	0.000964	0.001306	0.001312	0.001634	0.001443	0.000898	0.001093	0.001031	0.001128
3329.14	0.000926	0.000804	0.000824	0.000904	0.001181	0.001512	0.001498	0.001495	0.000781	0.001122	0.000929	0.001043
3331.07	0.000902	0.000584	0.000598	0.000693	0.001063	0.001434	0.001179	0.00135	0.000575	0.000883	0.000798	0.00084
3332.99	0.000613	0.000272	0.000296	0.00039	0.000862	0.00106	0.000732	0.00104	0.000343	0.000349	0.000397	0.000558
3334.92	0.000182	-5.9e-05	5e-05	2.6e-05	0.000499	0.000525	0.000137	0.00053	3.4e-05	-0.000198	-0.000142	0.000155
3336.85	-0.000333	-0.000344	-0.000168	-0.000384	-2.1e-05	-0.000149	-0.000489	-6.1e-05	-0.000411	-0.000618	-0.000444	-0.000308
3338.78	-0.000875	-0.000705	-0.000482	-0.000712	-0.000544	-0.00078	-0.000826	-0.000583	-0.00089	-0.000928	-0.000626	-0.000714
3340.71	-0.00131	-0.000966	-0.000854	-0.001036	-0.000957	-0.001091	-0.001019	-0.000953	-0.00131	-0.001106	-0.000904	-0.001108
3342.64	-0.00153	-0.001238	-0.001306	-0.00137	-0.001303	-0.001334	-0.001109	-0.001188	-0.00158	-0.001252	-0.001232	-0.001424
3344.57	-0.0018	-0.001584	-0.001826	-0.001699	-0.001624	-0.001647	-0.001228	-0.001428	-0.001787	-0.001556	-0.001678	-0.00167
3346.5	-0.002007	-0.001911	-0.002262	-0.00203	-0.001863	-0.001933	-0.001522	-0.00183	-0.001948	-0.001937	-0.002138	-0.001879
3348.42	-0.002055	-0.002261	-0.002447	-0.002312	-0.001955	-0.002146	-0.001931	-0.002255	-0.002032	-0.002192	-0.002281	-0.002097
3350.35	-0.002289	-0.002584	-0.002585	-0.002619	-0.002152	-0.002342	-0.002377	-0.002577	-0.002194	-0.002384	-0.002307	-0.00241
3352.28	-0.002647	-0.002804	-0.002734	-0.002867	-0.002524	-0.002522	-0.002665	-0.002851	-0.002434	-0.002537	-0.002557	-0.002686
3354.21	-0.002765	-0.002802	-0.002757	-0.002962	-0.00278	-0.002541	-0.002803	-0.002807	-0.002669	-0.002633	-0.002809	-0.002713
3356.14	-0.002718	-0.002746	-0.002785	-0.002936	-0.00285	-0.002569	-0.002897	-0.002742	-0.002817	-0.002738	-0.002948	-0.002616
3358.07	-0.002717	-0.002681	-0.002796	-0.002793	-0.002746	-0.00267	-0.00285	-0.002807	-0.002875	-0.002915	-0.002894	-0.002503
3360	-0.002649	-0.002616	-0.00277	-0.002584	-0.002549	-0.00276	-0.002671	-0.002825	-0.002824	-0.002959	-0.002676	-0.002476
3361.93	-0.0026	-0.002653	-0.002696	-0.002422	-0.002401	-0.002684	-0.00254	-0.002736	-0.002725	-0.00283	-0.002491	-0.002539
3363.86	-0.002657	-0.002753	-0.00261	-0.002468	-0.00248	-0.002622	-0.002488	-0.002651	-0.002706	-0.002713	-0.002498	-0.002641
3365.78	-0.002666	-0.002746	-0.002536	-0.002573	-0.002563	-0.002576	-0.00235	-0.002578	-0.002626	-0.002586	-0.002569	-0.002623
3367.71	-0.00259	-0.002515	-0.002408	-0.002581	-0.002431	-0.002441	-0.002232	-0.002406	-0.002487	-0.002454	-0.00253	-0.002467
3369.64	-0.002538	-0.002359	-0.002359	-0.002539	-0.002278	-0.002349	-0.002338	-0.002418	-0.002378	-0.0024	-0.002488	-0.002438
3371.57	-0.002517	-0.002336	-0.002361	-0.002476	-0.0022	-0.002356	-0.002406	-0.002428	-0.002326	-0.002401	-0.002345	-0.002431
3373.5	-0.002518	-0.002375	-0.002429	-0.002439	-0.002263	-0.002441	-0.002435	-0.002395	-0.002337	-0.002371	-0.002251	-0.002376
3375.43	-0.00252	-0.002457	-0.002456	-0.002425	-0.002372	-0.002431	-0.002485	-0.002372	-0.002349	-0.002367	-0.002265	-0.002288
3377.36	-0.002367	-0.002375	-0.002261	-0.002343	-0.002328	-0.00229	-0.002364	-0.002236	-0.002288	-0.002306	-0.002247	-0.002195
3379.29	-0.002185	-0.002252	-0.00211	-0.002327	-0.00217	-0.002209	-0.002244	-0.002173	-0.002225	-0.00221	-0.00222	-0.002176
3381.21	-0.002133	-0.002273	-0.00214	-0.002356	-0.002056	-0.002156	-0.002294	-0.002256	-0.00219	-0.002197	-0.002199	-0.002226
3383.14	-0.002147	-0.002334	-0.002206	-0.002278	-0.002126	-0.002047	-0.002373	-0.002364	-0.002151	-0.002248	-0.002198	-0.002292
3385.07	-0.002083	-0.002184	-0.002081	-0.002013	-0.002054	-0.001906	-0.002166	-0.002208	-0.001977	-0.002173	-0.002075	-0.002077
3387	-0.002116	-0.002055	-0.002019	-0.001797	-0.001905	-0.001853	-0.001906	-0.002093	-0.001762	-0.002065	-0.002001	-0.001832
3388.93	-0.002123	-0.001971	-0.001984	-0.001724	-0.001866	-0.001823	-0.001817	-0.002071	-0.001681	-0.001961	-0.002004	-0.001727
3390.86	-0.001976	-0.001785	-0.001932	-0.001715	-0.001778	-0.001788	-0.001713	-0.001931	-0.001659	-0.001782	-0.001945	-0.001673
3392.79	-0.002037	-0.001915	-0.002141	-0.002046	-0.001826	-0.00198	-0.001789	-0.00193	-0.001872	-0.001799	-0.00195	-0.001817
3394.72	-0.002015	-0.002067	-0.002241	-0.002239	-0.001929	-0.002041	-0.001818	-0.001828	-0.002067	-0.001849	-0.001888	-0.001869
3396.64	-0.001827	-0.00198	-0.002006	-0.002132	-0.001891	-0.00193	-0.001669	-0.00164	-0.002043	-0.001788	-0.001748	-0.001738
3398.57	-0.001668	-0.001836	-0.001693	-0.001942	-0.001621	-0.001764	-0.001531	-0.001519	-0.00181	-0.001721	-0.001592	-0.001572
3400.5	-0.001706	-0.001764	-0.001576	-0.001801	-0.001522	-0.001657	-0.001638	-0.001559	-0.001692	-0.001704	-0.00156	-0.001568
3402.43	-0.001699	-0.001633	-0.001454	-0.00163	-0.00157	-0.001545	-0.001745	-0.001596	-0.001707	-0.001608	-0.00158	-0.001535
3404.36	-0.001698	-0.00154	-0.001435	-0.001527	-0.001515	-0.001433	-0.001699	-0.001574	-0.001621	-0.001575	-0.00155	-0.001527
3406.29	-0.001815	-0.001627	-0.001673	-0.001636	-0.001491	-0.001543	-0.001636	-0.001633	-0.001592	-0.001628	-0.001595	-0.001636
3408.22	-0.001806	-0.001722	-0.001959	-0.001641	-0.001533	-0.001682	-0.001496	-0.001727	-0.001513	-0.001616	-0.00165	-0.001598
3410.15	-0.001917	-0.001938	-0.002208	-0.001812	-0.001745	-0.001865	-0.001631	-0.002001	-0.001616	-0.001746	-0.001724	-0.001621
3412.08	-0.001907	-0.002034	-0.002154	-0.001916	-0.001915	-0.001892	-0.001873	-0.002098	-0.001837	-0.001882	-0.001747	-0.001676
3414	-0.001775	-0.001888	-0.001858	-0.001888	-0.001923	-0.001763	-0.002006	-0.001872	-0.001989	-0.001885	-0.001736	-0.001645
3415.93	-0.00201	-0.002002	-0.001894	-0.002153	-0.001967	-0.001859	-0.002285	-0.001845	-0.002139	-0.002007	-0.001931	-0.001791
3417.86	-0.002468	-0.002304	-0.002271	-0.00246	-0.002104	-0.002116	-0.002562	-0.002055	-0.002183	-0.002216	-0.002229	-0.002123
3419.79	-0.002755	-0.002492	-0.002595	-0.002527	-0.002269	-0.002375	-0.00258	-0.002269	-0.002193	-0.002306	-0.002404	-0.002316
3421.72	-0.002709	-0.002574	-0.002684	-0.002405	-0.002458	-0.002538	-0.002478	-0.00243	-0.00225	-0.002361	-0.002419	-0.00234
3423.65	-0.002426	-0.002511	-0.002493	-0.00225	-0.002521	-0.002458	-0.00234	-0.002464	-0.002269	-0.002337	-0.002283	-0.002292
3425.58	-0.002041	-0.00234	-0.002123	-0.001999	-0.002348	-0.002163	-0.002056	-0.002327	-0.002128	-0.002181	-0.002074	-0.002123
3427.51	-0.001936	-0.002322	-0.001952	-0.001994	-0.002261	-0.002085	-0.001931	-0.002232	-0.002056	-0.002096	-0.002002	-0.002017
3429.43	-0.002193	-0.002456	-0.002135	-0.002233	-0.002315	-0.002325	-0.00209	-0.002372	-0.002158	-0.002138	-0.002136	-0.002049
3431.36	-0.002414	-0.002412	-0.002241	-0.00232	-0.002274	-0.002464	-0.002197	-0.002487	-0.002185	-0.002141	-0.002228	-0.002081
3433.29	-0.002438	-0.00224	-0.002226	-0.002299	-0.002182	-0.00239	-0.002228	-0.002393	-0.002103	-0.002125	-0.002178	-0.002044
3435.22	-0.002249	-0.001955	-0.002131	-0.002202	-0.002052	-0.002135	-0.002133	-0.00215	-0.002012	-0.002072	-0.002045	-0.001898
3437.15	-0.002283	-0.001922	-0.002145	-0.002307	-0.002012	-0.001962	-0.002183	-0.002085	-0.001991	-0.002075	-0.001992	-0.001914
3439.08	-0.002133	-0.001953	-0.002049	-0.002186	-0.001899	-0.001768	-0.002137	-0.001922	-0.001906	-0.001992	-0.001833	-0.001857
3441.01	-0.001902	-0.00192	-0.001956	-0.002035	-0.001788	-0.001722	-0.002046	-0.00169	-0.001797	-0.001835	-0.001679	-0.001731
3442.94	-0.002131	-0.002193	-0.00222	-0.002286	-0.001915	-0.002101	-0.002331	-0.001943	-0.001829	-0.001949	-0.001933	-0.001861
3444.87	-0.002334	-0.00242	-0.00237	-0.002394	-0.00209	-0.002345	-0.002539	-0.002239	-0.001964	-0.00212	-0.002187	-0.001969
3446.79	-0.002351	-0.00243	-0.002293	-0.002284	-0.002261	-0.00239	-0.002452	-0.002304	-0.002102	-0.002189	-0.002183	-0.001959
3448.72	-0.002224	-0.002203	-0.002042	-0.002037	-0.002248	-0.00232	-0.00211	-0.00219	-0.002147	-0.002056	-0.001972	-0.001858
3450.65	-0.002198	-0.002015	-0.001906	-0.001967	-0.0021	-0.002172	-0.001876	-0.002069	-0.002111	-0.001876	-0.001756	-0.001824
3452.58	-0.001968	-0.001795	-0.001776	-0.001839	-0.001837	-0.001877	-0.001594	-0.001844	-0.001915	-0.001713	-0.001555	-0.001679
3454.51	-0.001874	-0.001801	-0.001849	-0.001863	-0.001743	-0.001755	-0.001493	-0.00176	-0.001729	-0.001712	-0.001611	-0.001621
3456.44	-0.002118	-0.002116	-0.002045	-0.002105	-0.00187	-0.001921	-0.001782	-0.001948	-0.001734	-0.00191	-0.001923	-0.001763
3458.37	-0.002069	-0.002187	-0.001931	-0.001984	-0.001949	-0.00195	-0.001946	-0.001961	-0.00184	-0.001979	-0.001996	-0.001792
3460.3	-0.001998	-0.002151	-0.001877	-0.001832	-0.002084	-0.001936	-0.002048	-0.001976	-0.001929	-0.001947	-0.001945	-0.001871
3462.22	-0.002043	-0.00206	-0.001962	-0.001882	-0.002153	-0.001922	-0.002144	-0.002058	-0.001974	-0.001881	-0.001927	-0.001949
3464.15	-0.001981	-0.001904	-0.002054	-0.001984	-0.002054	-0.00187	-0.002192	-0.002118	-0.001989	-0.001861	-0.001915	-0.001901
3466.08	-0.001838	-0.001803	-0.002081	-0.001972	-0.001907	-0.001835	-0.002093	-0.002098	-0.001932	-0.001855	-0.001847	-0.001768
3468.01	-0.001756	-0.00172	-0.002027	-0.00189	-0.001776	-0.001814	-0.001875	-0.001916	-0.001821	-0.001785	-0.001741	-0.001623
3469.94	-0.002005	-0.001897	-0.002091	-0.00204	-0.001823	-0.002039	-0.001894	-0.001979	-0.001846	-0.001847	-0.001766	-0.001672
3471.87	-0.002169	-0.002099	-0.002103	-0.002088	-0.001975	-0.002203	-0.001965	-0.002066	-0.001978	-0.001936	-0.001817	-0.001793
3473.8	-0.00201	-0.001991	-0.001948	-0.001841	-0.001914	-0.001951	-0.001856	-0.001835	-0.001904	-0.001833	-0.001749	-0.001821
3475.73	-0.001918	-0.001913	-0.001867	-0.001806	-0.001747	-0.001777	-0.001857	-0.001712	-0.00176	-0.001754	-0.001719	-0.001851
3477.66	-0.002037	-0.002045	-0.001986	-0.001987	-0.001755	-0.00188	-0.002054	-0.001826	-0.001781	-0.001855	-0.001825	-0.001849
3479.58	-0.002078	-0.002095	-0.002059	-0.002057	-0.001863	-0.001986	-0.002068	-0.001878	-0.001862	-0.001913	-0.001883	-0.001758
3481.51	-0.00198	-0.002044	-0.001977	-0.002023	-0.001981	-0.00205	-0.001942	-0.001889	-0.00184	-0.001909	-0.001866	-0.001692
3483.44	-0.002056	-0.002133	-0.001995	-0.002077	-0.002182	-0.002137	-0.002023	-0.002085	-0.00184	-0.001933	-0.001872	-0.001749
3485.37	-0.002009	-0.002019	-0.001937	-0.001998	-0.00222	-0.002019	-0.002072	-0.002098	-0.001867	-0.001859	-0.001786	-0.001804
3487.3	-0.001876	-0.001733	-0.00183	-0.001761	-0.002011	-0.001802	-0.001965	-0.001924	-0.001796	-0.001756	-0.001651	-0.001755
3489.23	-0.001932	-0.00174	-0.001893	-0.001733	-0.001848	-0.001782	-0.001849	-0.001886	-0.001763	-0.001778	-0.001632	-0.00165
3491.16	-0.002038	-0.00199	-0.002015	-0.001875	-0.001857	-0.001959	-0.001856	-0.001953	-0.00188	-0.001895	-0.001756	-0.00162
3493.09	-0.001878	-0.002011	-0.001826	-0.001792	-0.001832	-0.001985	-0.00178	-0.001874	-0.001921	-0.001861	-0.001732	-0.00153
3495.01	-0.001591	-0.00174	-0.001502	-0.001548	-0.001649	-0.001679	-0.00164	-0.001636	-0.001627	-0.001599	-0.001543	-0.001385
3496.94	-0.001555	-0.001546	-0.00153	-0.001569	-0.001419	-0.001398	-0.001642	-0.001441	-0.001241	-0.001337	-0.001434	-0.001362
3498.87	-0.001945	-0.001719	-0.001871	-0.00195	-0.001498	-0.001563	-0.001897	-0.001529	-0.001256	-0.001476	-0.001586	-0.001599
3500.8	-0.002189	-0.001876	-0.001997	-0.002107	-0.001764	-0.001793	-0.001927	-0.001718	-0.001507	-0.00172	-0.00173	-0.001787
3502.73	-0.001997	-0.001826	-0.001834	-0.001983	-0.001862	-0.001798	-0.001674	-0.001709	-0.001695	-0.001722	-0.001681	-0.001715
3504.66	-0.00198	-0.001943	-0.0018	-0.002057	-0.002007	-0.001982	-0.001809	-0.001826	-0.001948	-0.001796	-0.00173	-0.001744
3506.59	-0.001886	-0.001877	-0.001699	-0.001903	-0.002083	-0.002031	-0.001919	-0.001915	-0.002059	-0.001834	-0.001737	-0.001713
3508.52	-0.001679	-0.001683	-0.001629	-0.001672	-0.001933	-0.001844	-0.001861	-0.001855	-0.00189	-0.001777	-0.001656	-0.001609
3510.45	-0.001791	-0.001789	-0.001813	-0.001772	-0.001898	-0.001901	-0.001945	-0.001896	-0.00179	-0.001883	-0.001726	-0.001643
3512.37	-0.002048	-0.001969	-0.001913	-0.001889	-0.002016	-0.002091	-0.002028	-0.001989	-0.001905	-0.002043	-0.001893	-0.001741
3514.3	-0.00187	-0.001729	-0.001626	-0.001564	-0.001867	-0.001842	-0.001662	-0.001772	-0.001809	-0.00182	-0.001714	-0.001575
3516.23	-0.001424	-0.001317	-0.001285	-0.001165	-0.001405	-0.001285	-0.001181	-0.001266	-0.001399	-0.001359	-0.001295	-0.001201
3518.16	-0.001506	-0.001445	-0.001382	-0.001359	-0.001206	-0.001171	-0.001255	-0.001218	-0.001192	-0.001234	-0.001199	-0.001159
3520.09	-0.001461	-0.00158	-0.001436	-0.001498	-0.001168	-0.001214	-0.001342	-0.001328	-0.001164	-0.001229	-0.001184	-0.001183
3522.02	-0.001478	-0.001697	-0.001531	-0.00168	-0.001238	-0.001382	-0.001465	-0.001408	-0.001285	-0.001273	-0.001239	-0.001226
3523.95	-0.001871	-0.001964	-0.001856	-0.002019	-0.001554	-0.001829	-0.001846	-0.001672	-0.001589	-0.00149	-0.001518	-0.001495
3525.88	-0.0023	-0.002209	-0.002144	-0.002292	-0.002048	-0.002274	-0.00231	-0.002038	-0.001946	-0.00183	-0.001874	-0.001816
3527.8	-0.002308	-0.002066	-0.002118	-0.002104	-0.002395	-0.002337	-0.002368	-0.002177	-0.002132	-0.002014	-0.001921	-0.001881
3529.73	-0.001844	-0.001529	-0.001756	-0.001615	-0.002218	-0.001955	-0.00193	-0.001928	-0.00192	-0.001839	-0.001633	-0.00162
3531.66	-0.001754	-0.001519	-0.001607	-0.001602	-0.002001	-0.001783	-0.001758	-0.001895	-0.001761	-0.001726	-0.001571	-0.00154
3533.59	-0.001678	-0.00165	-0.001574	-0.001594	-0.001824	-0.001688	-0.00169	-0.001839	-0.001726	-0.001661	-0.001557	-0.001536
3535.52	-0.001737	-0.001738	-0.001646	-0.001625	-0.001738	-0.001656	-0.001696	-0.00174	-0.001715	-0.001634	-0.001545	-0.001525
3537.45	-0.001616	-0.001615	-0.001608	-0.001473	-0.001577	-0.001474	-0.001581	-0.00153	-0.001528	-0.001489	-0.001434	-0.001422
3539.38	-0.001216	-0.0013	-0.001434	-0.001196	-0.001185	-0.001099	-0.001248	-0.001216	-0.00104	-0.001143	-0.001181	-0.001173
3541.31	-0.001281	-0.001338	-0.001562	-0.001356	-0.001075	-0.001136	-0.001276	-0.001247	-0.000811	-0.001015	-0.001124	-0.001144
3543.23	-0.001737	-0.00173	-0.001801	-0.001799	-0.001339	-0.001559	-0.001646	-0.001554	-0.001075	-0.001234	-0.001336	-0.001366
3545.16	-0.002062	-0.002036	-0.001879	-0.002002	-0.001669	-0.001906	-0.001923	-0.001751	-0.001506	-0.001515	-0.001596	-0.001557
3547.09	-0.002231	-0.00207	-0.001901	-0.002025	-0.001936	-0.002092	-0.002073	-0.001766	-0.001867	-0.001739	-0.001694	-0.001608
3549.02	-0.002212	-0.001915	-0.001803	-0.001965	-0.002099	-0.002085	-0.002022	-0.001719	-0.002063	-0.001876	-0.001646	-0.001581
3550.95	-0.001862	-0.001625	-0.001585	-0.001714	-0.001992	-0.001797	-0.001773	-0.001604	-0.001987	-0.001826	-0.001464	-0.001482
3552.88	-0.001642	-0.001552	-0.001561	-0.001614	-0.001824	-0.001594	-0.001707	-0.00167	-0.001806	-0.001709	-0.001353	-0.001444
3554.81	-0.00174	-0.001721	-0.001703	-0.00169	-0.001861	-0.001641	-0.001822	-0.001882	-0.001763	-0.001684	-0.001425	-0.001479
3556.74	-0.001662	-0.001642	-0.001486	-0.001433	-0.001693	-0.001528	-0.00161	-0.001751	-0.001606	-0.001514	-0.001364	-0.001312
3558.67	-0.001108	-0.001094	-0.000946	-0.000724	-0.000941	-0.000952	-0.000819	-0.000959	-0.000978	-0.000904	-0.000943	-0.000772
3560.59	-0.00089	-0.000848	-0.000985	-0.000791	-0.000252	-0.000571	-0.000469	-0.000288	-0.000204	-0.000368	-0.000659	-0.000448
3562.52	-0.001595	-0.001469	-0.001735	-0.001883	-0.000639	-0.001164	-0.001241	-0.000735	-0.000293	-0.000703	-0.00109	-0.000928
3564.45	-0.00238	-0.002204	-0.002341	-0.002689	-0.001602	-0.002019	-0.002208	-0.00168	-0.001132	-0.001464	-0.001707	-0.001644
3566.38	-0.002705	-0.002581	-0.00251	-0.002829	-0.002511	-0.002542	-0.002793	-0.002488	-0.002146	-0.002118	-0.002119	-0.002126
3568.31	-0.00251	-0.002514	-0.002204	-0.002401	-0.002975	-0.002594	-0.002771	-0.00278	-0.002842	-0.002467	-0.002155	-0.002185
3570.24	-0.001874	-0.002009	-0.001559	-0.001552	-0.002715	-0.002189	-0.002188	-0.002347	-0.002866	-0.002273	-0.001733	-0.001773
3572.17	-0.000983	-0.001212	-0.001031	-0.000701	-0.001888	-0.00142	-0.001295	-0.001413	-0.002143	-0.001558	-0.001094	-0.001096
3574.1	-0.000928	-0.001063	-0.001236	-0.00092	-0.001417	-0.001145	-0.001105	-0.001076	-0.001355	-0.001117	-0.000909	-0.000917
3576.02	-0.001717	-0.001632	-0.001718	-0.001642	-0.001675	-0.001612	-0.001587	-0.001578	-0.001374	-0.001382	-0.001264	-0.001333
3577.95	-0.001868	-0.00166	-0.00155	-0.001547	-0.001671	-0.001611	-0.001549	-0.001642	-0.001501	-0.001471	-0.001317	-0.001406
3579.88	-0.001196	-0.001079	-0.001071	-0.001	-0.001124	-0.001002	-0.000861	-0.00107	-0.001063	-0.001052	-0.000997	-0.000988
3581.81	-0.000996	-0.000921	-0.001062	-0.001087	-0.000611	-0.000767	-0.000559	-0.000715	-0.000418	-0.000671	-0.000815	-0.000716
3583.74	-0.001642	-0.001439	-0.001605	-0.001761	-0.000872	-0.001303	-0.001226	-0.001103	-0.000541	-0.000854	-0.00108	-0.000982
3585.67	-0.002051	-0.001813	-0.001951	-0.00202	-0.001499	-0.001799	-0.001852	-0.00163	-0.001191	-0.001281	-0.001377	-0.001333
3587.6	-0.00205	-0.001869	-0.00189	-0.001797	-0.001927	-0.001919	-0.002046	-0.001851	-0.0017	-0.001575	-0.001461	-0.001452
3589.53	-0.001911	-0.001772	-0.001657	-0.001512	-0.002026	-0.001807	-0.002004	-0.001749	-0.001936	-0.001663	-0.001421	-0.001354
3591.46	-0.001487	-0.001404	-0.001265	-0.001153	-0.001748	-0.00143	-0.001664	-0.001355	-0.001789	-0.001464	-0.001223	-0.001088
3593.38	-0.000987	-0.001004	-0.001045	-0.000938	-0.001224	-0.000996	-0.001098	-0.00089	-0.00123	-0.001068	-0.00098	-0.000823
3595.31	-0.001352	-0.001361	-0.00143	-0.001464	-0.001235	-0.001307	-0.001311	-0.001138	-0.001105	-0.001148	-0.001134	-0.001056
3597.24	-0.001815	-0.001788	-0.001675	-0.001778	-0.001756	-0.001818	-0.001775	-0.001681	-0.001634	-0.001526	-0.001395	-0.00144
3599.17	-0.001541	-0.001537	-0.001333	-0.001321	-0.001866	-0.001694	-0.001477	-0.001639	-0.001775	-0.001463	-0.00125	-0.001338
3601.1	-0.001064	-0.001094	-0.001035	-0.000851	-0.001421	-0.0012	-0.000913	-0.001199	-0.001277	-0.001018	-0.000907	-0.000918
3603.03	-0.001068	-0.00102	-0.001039	-0.00097	-0.001047	-0.000972	-0.000853	-0.000987	-0.000801	-0.000742	-0.000754	-0.000713
3604.96	-0.001043	-0.000969	-0.001003	-0.001049	-0.00085	-0.000921	-0.000916	-0.000891	-0.000569	-0.000677	-0.000707	-0.000725
3606.89	-0.000937	-0.000912	-0.001063	-0.00108	-0.000643	-0.00085	-0.000957	-0.000736	-0.000356	-0.000641	-0.000709	-0.000692
3608.81	-0.001371	-0.001279	-0.00127	-0.00147	-0.000815	-0.001131	-0.00143	-0.000991	-0.000537	-0.000839	-0.000904	-0.00079
3610.74	-0.001553	-0.00144	-0.001176	-0.001498	-0.001072	-0.001271	-0.001599	-0.001169	-0.000934	-0.000946	-0.000989	-0.00082
3612.67	-0.001276	-0.001123	-0.001073	-0.001164	-0.001012	-0.0011	-0.001192	-0.000893	-0.001031	-0.000784	-0.000886	-0.000682
3614.6	-0.001279	-0.001057	-0.001286	-0.001145	-0.001102	-0.001248	-0.001112	-0.000923	-0.00111	-0.000847	-0.000933	-0.000812
3616.53	-0.001546	-0.001293	-0.001416	-0.001326	-0.001651	-0.00169	-0.00148	-0.00142	-0.001543	-0.0013	-0.001189	-0.001252
3618.46	-0.001485	-0.00133	-0.001226	-0.00114	-0.002037	-0.001805	-0.001541	-0.00167	-0.001918	-0.001649	-0.001224	-0.001412
3620.39	-0.001056	-0.001165	-0.000873	-0.000807	-0.001788	-0.001306	-0.001188	-0.001443	-0.001695	-0.00145	-0.00091	-0.001051
3622.32	-0.000495	-0.000772	-0.000736	-0.000564	-0.000999	-0.000476	-0.000579	-0.000782	-0.000815	-0.000748	-0.000442	-0.000463
3624.25	-0.000595	-0.000637	-0.000975	-0.000718	-0.000401	-0.000203	-0.000571	-0.000386	-0.000163	-0.000295	-0.000312	-0.000204
3626.17	-0.00106	-0.000804	-0.001297	-0.001092	-0.000385	-0.000543	-0.000951	-0.000529	-0.000122	-0.00033	-0.000583	-0.000416
3628.1	-0.001649	-0.001266	-0.001431	-0.001475	-0.001048	-0.001319	-0.001536	-0.001177	-0.000787	-0.000846	-0.001018	-0.000925
3630.03	-0.001733	-0.001472	-0.001189	-0.001444	-0.001767	-0.001807	-0.001782	-0.001652	-0.00164	-0.001363	-0.001263	-0.001295
3631.96	-0.001353	-0.001263	-0.00077	-0.001022	-0.001962	-0.001753	-0.001439	-0.001535	-0.001987	-0.001455	-0.001107	-0.001238
3633.89	-0.000703	-0.000868	-0.000484	-0.000577	-0.001565	-0.001241	-0.000772	-0.001039	-0.00159	-0.001069	-0.000767	-0.00094
3635.82	-0.000384	-0.000572	-0.0006	-0.000436	-0.000994	-0.000736	-0.00046	-0.000548	-0.000842	-0.000637	-0.00051	-0.000615
3637.75	-0.000884	-0.00083	-0.000722	-0.000725	-0.000867	-0.000774	-0.000929	-0.00066	-0.000669	-0.000695	-0.000568	-0.000551
3639.68	-0.000705	-0.00067	-0.000488	-0.000564	-0.000556	-0.000475	-0.000659	-0.000516	-0.000437	-0.000534	-0.000479	-0.000356
3641.6	-0.000444	-0.000319	-0.000426	-0.000407	0.000114	-3.1e-05	-8.1e-05	1.7e-05	0.000184	-4.2e-05	-0.000178	7.2e-05
3643.53	-0.000294	-0.000256	-0.000786	-0.000528	0.000644	0.000212	0.000121	0.000298	0.00077	0.000295	-0.00011	0.000194
3645.46	-0.000766	-0.000575	-0.001139	-0.000949	0.000379	-0.000246	-0.000437	-5.8e-05	0.000562	7.3e-05	-0.000315	-9.7e-05
3647.39	-0.001308	-0.001057	-0.001184	-0.001233	-0.000558	-0.000982	-0.001218	-0.000858	-0.000377	-0.00051	-0.000676	-0.000671
3649.32	-0.001321	-0.001187	-0.001007	-0.001081	-0.001427	-0.001379	-0.001502	-0.001333	-0.001325	-0.000994	-0.000858	-0.001023
3651.25	-0.001198	-0.00114	-0.00068	-0.000867	-0.001949	-0.001533	-0.001568	-0.001466	-0.001965	-0.001344	-0.000872	-0.00116
3653.18	-0.0007	-0.000766	-0.000378	-0.000493	-0.00184	-0.001221	-0.001068	-0.00116	-0.001839	-0.001275	-0.000708	-0.001029
3655.11	-0.00026	-0.000453	-0.000352	-0.000317	-0.001279	-0.000775	-0.000533	-0.000665	-0.001183	-0.000917	-0.000491	-0.000677
3657.04	-0.000241	-0.000517	-0.000539	-0.000451	-0.000993	-0.000674	-0.00059	-0.000615	-0.00082	-0.000776	-0.000541	-0.00058
3658.96	-0.000661	-0.000612	-0.000516	-0.000592	-0.000995	-0.000844	-0.000844	-0.000796	-0.00091	-0.000766	-0.000587	-0.000539
3660.89	-0.000642	-0.00051	-0.000329	-0.000375	-0.000731	-0.000616	-0.000542	-0.000688	-0.000804	-0.000492	-0.000476	-0.000362
3662.82	-0.000192	-0.00024	-0.000363	-0.000203	-8.6e-05	-7e-06	0.000147	-0.000165	-0.000137	1.6e-05	-0.00024	-8e-06
3664.75	-0.00048	-0.000288	-0.000531	-0.000499	0.000404	0.000194	5.5e-05	9.1e-05	0.000461	0.0002	-9.6e-05	0.000239
3666.68	-0.000654	-0.000436	-0.000576	-0.000624	0.000446	0.000127	-0.000245	-3.5e-05	0.000568	0.00014	-0.000109	0.000121
3668.61	-0.000365	-0.000379	-0.000631	-0.000507	0.000375	7.4e-05	-0.00023	2.2e-05	0.000599	0.00015	-0.000112	7.2e-05
3670.54	-0.000535	-0.000346	-0.000647	-0.000581	0.000151	-0.000255	-0.000492	-4.8e-05	0.000355	-4.7e-05	-0.000174	-1.4e-05
3672.47	-0.000616	-0.000342	-0.00057	-0.000617	-0.000278	-0.000594	-0.000666	-0.000304	-0.000171	-0.000341	-0.000301	-0.000269
3674.39	-0.000553	-0.000357	-0.000404	-0.000518	-0.000732	-0.000787	-0.000689	-0.000569	-0.000712	-0.000569	-0.00042	-0.000523
3676.32	-0.000473	-0.000381	-0.000272	-0.000378	-0.001074	-0.000801	-0.000653	-0.000773	-0.001104	-0.000716	-0.000507	-0.000727
3678.25	-0.000633	-0.000529	-7.7e-05	-0.000211	-0.001291	-0.000862	-0.000808	-0.00093	-0.001448	-0.000864	-0.000506	-0.000778
3680.18	-0.000278	-0.000535	9.5e-05	0.000142	-0.001126	-0.000591	-0.000413	-0.000779	-0.001364	-0.000686	-0.000389	-0.00064
3682.11	8.3e-05	-0.00015	-6.6e-05	0.000266	-0.000291	-7e-06	0.000389	-0.000106	-0.000446	-0.000111	-8.2e-05	-3.4e-05
3684.04	-0.0001	0	-0.000279	-0.000141	0.000459	0.00024	0.000433	0.000245	0.000412	0.000203	0.000116	0.000369
3685.97	-0.000171	-0.000111	-0.000402	-0.000408	0.000554	0.000185	0.000117	0.000211	0.000683	0.000217	7.2e-05	0.000297
3687.9	-0.000378	-0.000263	-0.000363	-0.00045	0.000114	-0.000168	-0.00043	-6.5e-05	0.00027	-7e-05	-0.000123	-3.5e-05
3689.83	-0.000395	-0.000356	-0.000196	-0.000321	-0.000525	-0.000482	-0.000786	-0.00038	-0.000456	-0.000414	-0.000299	-0.000427
3691.75	-0.000371	-0.000368	-2.6e-05	-0.000141	-0.000922	-0.000637	-0.000767	-0.000479	-0.000976	-0.000576	-0.000314	-0.000556
3693.68	-0.000181	-0.000232	-1.7e-05	2.3e-05	-0.000812	-0.000458	-0.000305	-0.000343	-0.000966	-0.000409	-0.000203	-0.000451
3695.61	2.5e-05	2e-05	-0.000219	4.4e-05	-0.00032	-6.1e-05	0.000165	1e-05	-0.000356	-2.7e-05	3.4e-05	-0.000126
3697.54	3.2e-05	2.8e-05	-0.00024	-9.2e-05	2e-06	6.1e-05	9.2e-05	0.000111	0.000123	8.1e-05	9.5e-05	5.2e-05
3699.47	-4.4e-05	-7.3e-05	-8e-05	-0.000116	-3.2e-05	-5.8e-05	-0.00011	-2.7e-05	7.6e-05	-2.5e-05	-4.5e-05	3.4e-05
3701.4	-7.7e-05	-6.5e-05	6e-05	-9.5e-05	-0.000106	-0.000118	-0.000143	-0.000137	-0.000124	-0.000115	-0.000151	1.8e-05
3703.33	-1.5e-05	5.1e-05	0.000112	-0.000122	7.8e-05	5.4e-05	7.3e-05	-1.8e-05	-4.1e-05	-1.3e-05	-5.1e-05	0.000106
3705.26	2.7e-05	0.000123	-3e-06	-0.000159	0.000541	0.000384	0.000299	0.000368	0.00046	0.000287	0.000187	0.000284
3707.18	6.5e-05	5.8e-05	-0.000214	-0.000222	0.000778	0.000497	0.000253	0.000564	0.000866	0.000466	0.000345	0.000365
3709.11	-4.4e-05	-5.7e-05	-0.000295	-0.000278	0.000509	0.000241	-7.2e-05	0.000363	0.000738	0.000313	0.000272	0.000217
3711.04	-0.00015	-0.000131	-0.000114	-0.000163	-0.000143	-0.000249	-0.000406	-0.000136	4.9e-05	-9.8e-05	-3.2e-05	-0.000148
3712.97	-0.000184	-0.000145	7.5e-05	2.5e-05	-0.000613	-0.000515	-0.000423	-0.000471	-0.000629	-0.000348	-0.000229	-0.000367
3714.9	-0.000186	-8.2e-05	9.5e-05	9e-05	-0.000585	-0.000374	-0.000115	-0.000441	-0.000816	-0.000285	-0.000206	-0.000322
3716.83	-9.2e-05	6.5e-05	0	4.9e-05	-6.6e-05	5e-05	0.000283	-5.1e-05	-0.000312	1.2e-05	3.8e-05	-6.1e-05
3718.76	5e-05	8.6e-05	-0.000134	-4e-06	0.000463	0.000426	0.000436	0.000363	0.000435	0.000292	0.000205	0.000207
3720.69	7e-06	-1.3e-05	-0.000141	-3.4e-05	0.000513	0.000385	0.000255	0.000405	0.000647	0.000258	0.000163	0.000266
3722.61	-8.8e-05	-0.000107	-2.4e-05	5.6e-05	0.000202	0.000116	-2.3e-05	0.000131	0.000248	1.2e-05	-3e-06	4.9e-05
3724.54	-6.6e-05	-0.000122	5.6e-05	0.000212	-0.000192	-0.000119	-0.000144	-0.000187	-0.00034	-0.000202	-0.000107	-0.000112
3726.47	-0.000155	-0.000106	0.000155	0.00018	-0.000223	-0.000135	-0.000116	-0.000256	-0.000508	-0.000191	-3.8e-05	4.1e-05
3728.4	6.8e-05	4.3e-05	0.000104	5.6e-05	0.000211	0.000187	0.00025	1.7e-05	0.000174	0.000177	0.000101	0.00031
3730.33	0.000236	0.000182	-5.1e-05	-0.000159	0.000818	0.000528	0.000388	0.000381	0.00114	0.000544	0.000237	0.000494
3732.26	0.000308	4.1e-05	-7.9e-05	-0.00021	0.000885	0.000501	0.000129	0.000363	0.001315	0.000501	0.000115	0.00027
3734.19	7.5e-05	-0.00015	4.6e-05	-9.6e-05	0.000394	9e-05	-0.000306	8.3e-05	0.000607	0.000106	1.3e-05	-4.9e-05
3736.12	-0.000123	-0.000282	0.000159	6.5e-05	-0.000217	-0.00032	-0.000478	-0.000282	-0.000396	-0.000302	-5.4e-05	-0.000321
3738.05	-2.3e-05	-0.000111	-6.4e-05	0.000132	-0.000548	-0.000336	-0.000139	-0.000251	-0.000816	-0.000333	-7e-05	-0.000242
3739.97	-0.000172	0.000131	-0.000137	-6e-05	-0.000283	-0.000174	1.9e-05	-4.7e-05	-0.000391	-0.000107	3e-05	9.2e-05
3741.9	-1e-05	0.000283	-0.000151	-0.000251	0.000266	0.000159	0.000207	0.000134	0.000342	0.000252	9.8e-05	0.000348
3743.83	-2.1e-05	0.000392	-0.000187	-0.000428	0.000745	0.000411	0.000128	0.000469	0.000741	0.000429	0.000135	0.000562
3745.76	-0.0001	0.000283	-0.000154	-0.000341	0.000727	0.00026	-5e-05	0.000574	0.000642	0.000363	0.000135	0.000481
3747.69	-0.000258	7.7e-05	-7.2e-05	-0.000134	0.000273	-0.000102	-0.0002	0.000362	0.000164	0.000132	0.000142	0.000204
3749.62	-0.000201	-0.000139	1e-05	9.9e-05	-0.000336	-0.000383	-0.000212	-3.1e-05	-0.000429	-0.000207	-3.2e-05	-0.00024
3751.55	2.4e-05	-0.000174	4.9e-05	0.000221	-0.000809	-0.000473	-9.5e-05	-0.00033	-0.000776	-0.000434	-0.000193	-0.000524
3753.48	4.7e-05	-0.000177	0.000211	0.000157	-0.000895	-0.000477	-9.6e-05	-0.00055	-0.0008	-0.00054	-0.000248	-0.000543
3755.4	0.000117	-8.4e-05	0.000253	5.2e-05	-0.000759	-0.000318	-6.9e-05	-0.000451	-0.00072	-0.000481	-0.000246	-0.000361
3757.33	0.000112	7.7e-05	0.000125	5e-06	-0.000468	-0.000108	-6.7e-05	-0.000146	-0.000481	-0.000276	-0.000176	-0.000131
3759.26	5.8e-05	4.7e-05	-1.1e-05	5.3e-05	-0.000252	-8.8e-05	-0.00011	-5.1e-05	-0.00025	-8.3e-05	-6.4e-05	-5e-05
3761.19	1.6e-05	-9e-06	3.8e-05	0.000103	-0.000107	-6.9e-05	-0.000174	-5.2e-05	-0.00024	-3.2e-05	-2.3e-05	-6.8e-05
3763.12	0.000172	4.7e-05	1.9e-05	0.000152	5.4e-05	0.000105	3.7e-05	9.5e-05	-6.8e-05	6.9e-05	3.9e-05	-1.2e-05
3765.05	0.000173	0.000125	-9.6e-05	5e-05	0.000125	0.000178	0.000139	0.000241	0.000168	0.000168	0.000151	6.3e-05
3766.98	1.5e-05	8.4e-05	-0.000118	-5e-05	-2.9e-05	3.3e-05	-5.5e-05	0.000115	9.2e-05	3.3e-05	8.9e-05	-9e-06
3768.91	-0.000156	-5e-06	5.3e-05	-2.3e-05	-0.000332	-0.000222	-0.000329	-0.000148	-0.000333	-0.000232	-6e-06	-9.5e-05
3770.84	-7.7e-05	-0.000101	0.000175	0.000135	-0.000435	-0.000277	-0.000229	-0.000289	-0.000568	-0.000295	-8.4e-05	-0.000145
3772.76	8.8e-05	-9e-05	8.5e-05	0.000214	-0.000265	-0.000169	4.9e-05	-0.000155	-0.000383	-0.000142	-8.5e-05	-5.1e-05
3774.69	7.4e-05	-4.7e-05	5.9e-05	0.00014	-9e-06	-2.4e-05	8.8e-05	-1.7e-05	-0.000128	1.4e-05	-3.8e-05	3.3e-05
3776.62	9.5e-05	-2.6e-05	2.9e-05	2.2e-05	0.000147	0.000137	0.000132	8e-05	0.000101	0.000124	2.9e-05	7.2e-05
3778.55	1.8e-05	3.1e-05	3.3e-05	-0.00013	0.000233	0.000189	9e-05	0.000222	0.000287	0.000132	9.1e-05	0.0001
3780.48	-2.8e-05	8.2e-05	0.000101	-0.00016	0.000206	0.000134	3.3e-05	0.000234	0.000265	2.7e-05	0.000107	4.3e-05
3782.41	-3.3e-05	0.000125	0.000122	-6e-05	7e-05	-2.9e-05	-1.2e-05	0.000154	3.5e-05	-9.7e-05	0.000128	-7e-06
3784.34	3.5e-05	9.7e-05	2e-05	0.000106	-9e-05	-0.000123	8e-06	2.7e-05	-0.000173	-0.000152	5.4e-05	-8.6e-05
3786.27	2.3e-05	5.4e-05	-2.5e-05	0.000154	-0.000226	-0.000161	-1.9e-05	-0.000101	-0.000304	-0.000156	-4.2e-05	-9.5e-05
3788.19	-5e-05	-2.5e-05	7e-05	9.2e-05	-0.000217	-0.000108	-5.1e-05	-0.000215	-0.000388	-0.000114	-0.000113	-8.2e-05
3790.12	4.1e-05	-5.6e-05	-5.4e-05	-2e-06	0	9.2e-05	0.000154	-0.000137	-0.000138	5.5e-05	-7.9e-05	3.5e-05
3792.05	-7.9e-05	-9e-06	-0.0001	-0.000156	0.000386	0.000306	0.000195	9.8e-05	0.000393	0.000275	0.00012	0.00026
3793.98	8.6e-05	1.5e-05	-0.000158	-0.000142	0.000648	0.000534	0.000303	0.000224	0.000811	0.000448	0.000227	0.00033
3795.91	0.000177	3.3e-05	-0.000296	-0.000119	0.000753	0.00049	0.000244	0.000392	0.000954	0.000535	0.000314	0.000449
3797.84	-2.9e-05	-8e-06	-7.6e-05	-0.0001	0.000584	0.00022	-0.000103	0.000323	0.000641	0.000357	0.000261	0.00037
3799.77	-2.8e-05	4.7e-05	9.5e-05	-5.9e-05	0.000184	-1.7e-05	-0.000185	0.000196	0.000162	8.5e-05	9e-05	0.000103
3801.7	-2.2e-05	8.6e-05	6.3e-05	-7e-05	-0.000217	-0.0002	-0.000186	9.7e-05	-0.000262	-0.000152	-8.5e-05	-0.000142
3803.63	-8.4e-05	2.3e-05	5.5e-05	-2.1e-05	-0.000494	-0.000299	-0.000223	-0.000134	-0.000572	-0.000373	-0.000218	-0.000305
3805.55	-0.000169	-7e-05	0.00018	8.3e-05	-0.000598	-0.000275	-0.00021	-0.000328	-0.000705	-0.000457	-0.000229	-0.000329
3807.48	5.8e-05	-7.9e-05	0.000166	0.000238	-0.000465	-7.1e-05	8.2e-05	-0.000349	-0.000563	-0.000319	-0.000175	-0.000245
3809.41	0.000104	3.3e-05	6.6e-05	0.000218	-8.9e-05	6.5e-05	0.000197	-0.00014	-0.000149	-9.2e-05	5.3e-05	6e-06
3811.34	-1.7e-05	9.8e-05	0.00016	4.3e-05	0.000296	0.000171	8.1e-05	6.7e-05	0.000223	6.9e-05	0.000238	0.000182
3813.27	0.000289	0.000197	-4.5e-05	-3.3e-05	0.000639	0.000411	0.00037	0.000399	0.000715	0.00036	0.000324	0.000306
3815.2	0.000269	0.000228	-0.000244	-0.000159	0.000763	0.000402	0.000259	0.000658	0.001029	0.000589	0.000372	0.000551
3817.13	-6.5e-05	5.7e-05	-7.2e-05	-0.000161	0.000487	0.000138	-0.000162	0.000454	0.000722	0.000415	0.00021	0.000473
3819.06	-0.000184	-8.4e-05	9e-05	-1.7e-05	3.9e-05	-9.5e-05	-0.000265	0.000167	0.000157	8.2e-05	-2e-06	0.00014
3820.98	-0.000171	-5.3e-05	0.000198	7.4e-05	-0.000274	-0.00018	-0.000171	-7.3e-05	-0.000337	-0.000183	-0.000167	-0.0002
3822.91	-0.000154	7e-06	0.00026	3e-05	-0.000387	-0.000199	-9.2e-05	-0.000223	-0.000605	-0.000299	-0.000214	-0.000415
3824.84	-6.3e-05	-1.5e-05	0.00026	-2.3e-05	-0.00032	-0.000153	-2.9e-05	-0.000233	-0.000619	-0.000232	-0.000144	-0.000389
3826.77	0.000248	1.2e-05	8.7e-05	0.000115	-0.000122	8.1e-05	0.000218	-0.000107	-0.00033	-2.4e-05	1e-05	-0.000138
3828.7	0.000207	1.8e-05	-2.4e-05	0.000128	8.6e-05	0.000215	0.000136	0.00012	3e-05	0.000148	0.000194	0.000208
3830.63	6.6e-05	-0.000129	-3.4e-05	0.000196	0.000299	0.000292	8.4e-05	0.000254	0.000326	0.000221	0.000194	0.000272
3832.56	0.000117	7e-06	-0.000295	0.000169	0.000594	0.000365	0.00024	0.000427	0.000735	0.000351	0.000252	0.00035
3834.49	-0.000145	0.000283	-0.000298	-0.000136	0.000759	0.000275	6.2e-05	0.00048	0.000871	0.000389	0.000269	0.000399
3836.42	-0.000209	0.0003	-0.000102	-0.000278	0.000532	8.4e-05	-0.000115	0.000282	0.0006	0.000231	7.2e-05	0.000137
3838.34	-7.1e-05	0.000194	6.3e-05	-0.00024	8e-06	-0.000168	-0.000189	-7.4e-05	5e-05	-9e-05	-0.00014	-0.000138
3840.27	4e-05	0	0.000358	-6.3e-05	-0.000542	-0.000384	-0.000203	-0.000528	-0.000691	-0.000475	-0.000312	-0.000388
3842.2	0.000176	-0.000172	0.000428	0.000193	-0.000846	-0.000428	-5.3e-05	-0.00072	-0.001077	-0.000596	-0.00035	-0.00047
3844.13	0.000215	-0.000281	0.000226	0.000387	-0.000614	-0.000168	0.000212	-0.000471	-0.000765	-0.000344	-0.000117	-0.000168
3846.06	0.000279	-8.6e-05	-1.8e-05	0.000315	0.000239	0.000353	0.000701	0.000221	0.000202	0.000328	0.000384	0.000406
3847.99	3.1e-05	0.000278	-0.000215	-0.000111	0.001012	0.000597	0.000604	0.00096	0.001106	0.000818	0.000648	0.000741
3849.92	-0.000119	0.000356	-0.000316	-0.000359	0.001046	0.000446	0.000147	0.000937	0.001286	0.000702	0.000452	0.000526
3851.85	-0.000239	0.000234	-0.000217	-0.000402	0.000444	3.6e-05	-0.000365	0.000286	0.000684	0.000206	7e-05	5.9e-05
3853.77	-0.00022	-9e-06	2.8e-05	-0.000165	-0.000478	-0.000334	-0.00065	-0.000469	-0.000423	-0.000419	-0.000343	-0.00046
3855.7	1.3e-05	-0.000182	0.000201	0.00018	-0.000977	-0.000379	-0.000514	-0.000742	-0.001096	-0.000683	-0.00044	-0.00058
3857.63	0.000358	-0.000263	0.0002	0.000382	-0.000634	-4.2e-05	8.1e-05	-0.000409	-0.000777	-0.000326	-0.000176	-0.000267
[truncated: 74 more rows]
