# Supplementary material for: Fourier Transform Infrared with Attenuated Total Reflectance Applied to the Discrimination of Freshwater Planktonic Coccoid Green Microalgae
Source: PLoS One. 2014 Dec 26;9(12):e114458. doi: 10.1371/journal.pone.0114458 (PMC4277285; doi:10.1371/journal.pone.0114458)
Supplement: S11 Data — Raw data and its 9-point first derivative presented in .xlsx file for strain Selenastrum bibraianum (241). (XLSX) [file pone.0114458.s013.xlsx]

## Sheet: FTIR raw
	241_1.1	241_1.2	241_1.3	241_1.4	241_2.1	241_2.2	241_2.3	241_2.4	241_3.1	241_3.2	241_3.3	241_3.4
628.794	0.702161	0.675767	0.714401	0.707228	0.718157	0.711216	0.698797	0.661623	0.741232	0.709782	0.700598	0.676611
630.723	0.703646	0.704192	0.705981	0.694323	0.731931	0.721297	0.720983	0.694052	0.739913	0.715421	0.725868	0.713145
632.652	0.717285	0.720902	0.707889	0.710342	0.750087	0.719385	0.713875	0.71557	0.736367	0.729371	0.757761	0.730659
634.58	0.724363	0.714188	0.723159	0.732334	0.748643	0.722958	0.713062	0.699073	0.738257	0.73566	0.753957	0.757966
636.509	0.721652	0.726101	0.720535	0.71713	0.746522	0.74415	0.714471	0.691689	0.757864	0.732926	0.745814	0.788006
638.438	0.720991	0.742997	0.723431	0.720555	0.741569	0.741389	0.71882	0.705354	0.769716	0.750319	0.754324	0.776367
640.367	0.730818	0.746203	0.720006	0.731779	0.75036	0.745474	0.722856	0.713211	0.778242	0.763674	0.757572	0.758847
642.296	0.744011	0.753151	0.73133	0.73738	0.769854	0.761342	0.729018	0.729274	0.787526	0.771745	0.771802	0.7659
644.225	0.744181	0.755824	0.741023	0.752773	0.781062	0.7635	0.72579	0.736319	0.791388	0.780261	0.776318	0.781698
646.153	0.742313	0.755941	0.746759	0.767506	0.782419	0.76156	0.729917	0.735316	0.794622	0.781003	0.776735	0.783992
648.082	0.744322	0.765739	0.742602	0.763616	0.783269	0.759811	0.748109	0.736101	0.798012	0.785149	0.780501	0.778255
650.011	0.744111	0.765936	0.736349	0.759664	0.785056	0.759482	0.753925	0.735887	0.803339	0.793823	0.784507	0.783157
651.94	0.749963	0.762612	0.740396	0.757547	0.785462	0.768302	0.752266	0.742053	0.805476	0.801672	0.783791	0.786124
653.869	0.754329	0.764028	0.746067	0.75746	0.788227	0.772512	0.752016	0.743534	0.810309	0.799779	0.788522	0.790333
655.797	0.758129	0.767177	0.749105	0.762091	0.793806	0.772433	0.756122	0.742205	0.81437	0.795901	0.793295	0.793485
657.726	0.761863	0.771478	0.750914	0.763671	0.798861	0.777262	0.758253	0.745955	0.817609	0.804848	0.792685	0.795019
659.655	0.763701	0.771789	0.750152	0.765788	0.799542	0.776604	0.759562	0.749617	0.818421	0.811542	0.798781	0.798005
661.584	0.76558	0.772171	0.748019	0.769446	0.799968	0.776129	0.763597	0.752078	0.817684	0.812902	0.806181	0.79861
663.513	0.76414	0.775811	0.749537	0.772114	0.803215	0.776415	0.761245	0.752791	0.819302	0.812087	0.807742	0.799691
665.442	0.766994	0.780486	0.75123	0.773012	0.806843	0.778703	0.761871	0.754913	0.82455	0.814101	0.811307	0.802951
667.37	0.769039	0.781503	0.750552	0.778148	0.802683	0.777759	0.760284	0.752837	0.822344	0.815229	0.81001	0.801615
669.299	0.760421	0.774735	0.747525	0.771614	0.796875	0.771696	0.754236	0.74813	0.811588	0.80795	0.799607	0.794908
671.228	0.758716	0.772681	0.747033	0.765119	0.800706	0.771488	0.755386	0.749303	0.813369	0.807837	0.802419	0.796595
673.157	0.757089	0.77	0.74398	0.76339	0.798254	0.770298	0.753362	0.748044	0.812989	0.805618	0.799791	0.794895
675.086	0.75329	0.765855	0.738904	0.75971	0.793347	0.769273	0.751281	0.744804	0.811719	0.800988	0.793955	0.791166
677.014	0.749196	0.761682	0.733807	0.755949	0.789379	0.764479	0.746838	0.741004	0.805535	0.797201	0.790084	0.78659
678.943	0.744384	0.756341	0.728541	0.752142	0.784321	0.758279	0.741972	0.737346	0.798713	0.792262	0.78526	0.780872
680.872	0.737959	0.750187	0.723241	0.747009	0.77961	0.753023	0.737389	0.731607	0.794771	0.786283	0.779455	0.773563
682.801	0.733957	0.746716	0.719539	0.742437	0.775423	0.748502	0.731723	0.72622	0.789533	0.781471	0.773749	0.767779
684.73	0.731381	0.743615	0.717508	0.737283	0.771877	0.744762	0.727793	0.722645	0.785554	0.777487	0.770277	0.765296
686.658	0.72926	0.740822	0.715363	0.73316	0.772388	0.743196	0.725972	0.720377	0.783587	0.774101	0.767546	0.762168
688.587	0.728531	0.739492	0.714185	0.730165	0.772919	0.742633	0.725088	0.719761	0.782781	0.772214	0.764812	0.760216
690.516	0.727831	0.738398	0.714142	0.728516	0.770075	0.741844	0.724522	0.719536	0.780792	0.770519	0.763797	0.759561
692.445	0.728554	0.739332	0.715467	0.730381	0.769027	0.741288	0.725993	0.71929	0.779408	0.77116	0.764474	0.760359
694.374	0.731679	0.742875	0.717739	0.733805	0.770831	0.742933	0.728196	0.721459	0.78161	0.774258	0.767444	0.762662
696.303	0.73573	0.745785	0.721118	0.736166	0.774243	0.74691	0.730102	0.724649	0.785123	0.778011	0.77135	0.766518
698.231	0.737472	0.747169	0.723959	0.737643	0.776123	0.748716	0.731581	0.725824	0.788763	0.780905	0.774032	0.768685
700.16	0.736717	0.747593	0.723673	0.737935	0.77427	0.747739	0.731265	0.725245	0.789494	0.779868	0.774417	0.768106
702.089	0.733467	0.744621	0.72093	0.734553	0.770237	0.744375	0.728955	0.722992	0.785803	0.776063	0.771587	0.765946
704.018	0.728388	0.738398	0.715479	0.729653	0.764166	0.737176	0.722826	0.71578	0.778487	0.769577	0.765321	0.760551
705.947	0.721763	0.731302	0.708485	0.723069	0.756054	0.728149	0.712962	0.705972	0.7702	0.761598	0.756823	0.751542
707.875	0.714222	0.724266	0.700675	0.714557	0.747348	0.719525	0.703537	0.698204	0.761899	0.752975	0.74758	0.741262
709.804	0.706778	0.716524	0.692443	0.707284	0.73803	0.710791	0.695391	0.690189	0.753	0.744236	0.73791	0.732073
711.733	0.699597	0.709747	0.685761	0.701301	0.730568	0.703959	0.688796	0.683155	0.745753	0.736822	0.730505	0.724927
713.662	0.69542	0.705613	0.681215	0.696705	0.725959	0.698941	0.684215	0.678629	0.741242	0.731629	0.726233	0.720696
715.591	0.694201	0.704112	0.67905	0.694655	0.72336	0.695956	0.681518	0.675942	0.739124	0.729268	0.723551	0.718527
717.52	0.694689	0.704446	0.678722	0.695053	0.724383	0.696403	0.681785	0.675512	0.739067	0.729943	0.723555	0.717827
719.448	0.693287	0.703203	0.677027	0.694246	0.724081	0.695649	0.680637	0.673939	0.738191	0.729363	0.722861	0.716305
721.377	0.686629	0.696847	0.671566	0.687624	0.718237	0.689953	0.674816	0.66855	0.73237	0.722894	0.717034	0.71029
723.306	0.678126	0.687445	0.662428	0.67735	0.710118	0.681957	0.666777	0.660905	0.723323	0.713448	0.708492	0.701529
725.235	0.668671	0.67741	0.652267	0.667441	0.700996	0.673565	0.657895	0.653198	0.713576	0.703485	0.698014	0.691921
727.164	0.658989	0.667859	0.643209	0.657767	0.692026	0.665478	0.649592	0.645471	0.703786	0.694208	0.688291	0.682601
729.092	0.650623	0.659279	0.634828	0.648928	0.684673	0.657906	0.64242	0.637693	0.694898	0.685885	0.679954	0.674094
731.021	0.643404	0.652144	0.627097	0.642211	0.678164	0.651455	0.636281	0.63219	0.68751	0.679055	0.672292	0.667297
732.95	0.638436	0.64693	0.621776	0.637259	0.673015	0.646428	0.631636	0.62789	0.681639	0.6735	0.667313	0.662985
734.879	0.634928	0.642729	0.619094	0.63374	0.669459	0.642815	0.629147	0.624195	0.677806	0.669586	0.664063	0.659564
736.808	0.631794	0.639165	0.616672	0.631031	0.66684	0.640751	0.627229	0.622205	0.67558	0.667106	0.661455	0.65682
738.737	0.629218	0.636806	0.614026	0.628454	0.664407	0.638325	0.624671	0.619994	0.673088	0.664227	0.659031	0.654295
740.665	0.625135	0.633676	0.61038	0.624813	0.660381	0.634067	0.621169	0.616336	0.668797	0.659731	0.655012	0.650622
742.594	0.619263	0.628103	0.605925	0.620261	0.654536	0.628498	0.615767	0.611625	0.662757	0.653811	0.64944	0.645841
744.523	0.612732	0.622087	0.601067	0.614708	0.647073	0.62202	0.609593	0.605922	0.655504	0.647429	0.642844	0.639791
746.452	0.605867	0.615284	0.595077	0.608282	0.638564	0.614514	0.602232	0.598869	0.647533	0.63994	0.634933	0.63217
748.381	0.59869	0.608294	0.588488	0.602101	0.630138	0.606451	0.594915	0.591307	0.639568	0.631923	0.626619	0.624689
750.309	0.591783	0.601909	0.58165	0.595982	0.621836	0.598853	0.58757	0.583698	0.631284	0.623187	0.618586	0.616689
752.238	0.58619	0.59585	0.576134	0.590331	0.614356	0.591923	0.580221	0.576915	0.623123	0.61553	0.611183	0.609035
754.167	0.581438	0.591431	0.571744	0.585654	0.608328	0.585624	0.57426	0.571144	0.616623	0.609585	0.604632	0.602588
756.096	0.577478	0.587776	0.567702	0.582238	0.603303	0.580136	0.569302	0.566161	0.610963	0.60416	0.599696	0.597192
758.025	0.573991	0.584028	0.563998	0.579177	0.598413	0.575417	0.56451	0.561661	0.60557	0.599202	0.594757	0.592655
759.954	0.570606	0.580934	0.560803	0.575914	0.593445	0.570542	0.559842	0.557102	0.600965	0.594581	0.590042	0.588232
761.882	0.567101	0.578114	0.557896	0.57298	0.588878	0.56628	0.555691	0.553366	0.596474	0.590318	0.585917	0.583867
763.811	0.563749	0.574764	0.554679	0.570517	0.585096	0.562678	0.551679	0.549545	0.592567	0.586161	0.581301	0.579969
765.74	0.560139	0.571438	0.5514	0.566992	0.581414	0.558977	0.547652	0.545743	0.588447	0.581878	0.576974	0.576047
767.669	0.55642	0.567948	0.547882	0.562462	0.577296	0.555319	0.543887	0.542092	0.583353	0.577738	0.573237	0.571589
769.598	0.552315	0.563191	0.543663	0.558039	0.573258	0.551392	0.540798	0.53843	0.578713	0.573453	0.569298	0.567605
771.526	0.547527	0.558215	0.539308	0.553511	0.569778	0.548146	0.537566	0.535346	0.574636	0.56918	0.564859	0.5636
773.455	0.543194	0.554215	0.534958	0.549113	0.568196	0.546493	0.535581	0.533782	0.571439	0.566265	0.561886	0.559886
775.384	0.53933	0.549797	0.530526	0.544576	0.567057	0.545256	0.534272	0.532536	0.568846	0.563238	0.559249	0.556951
777.313	0.534674	0.544818	0.525984	0.539669	0.562732	0.541536	0.530339	0.528317	0.564651	0.558661	0.554585	0.552946
779.242	0.530326	0.541046	0.522139	0.535566	0.558372	0.537677	0.526682	0.524286	0.560229	0.554236	0.550051	0.548344
781.17	0.527483	0.538047	0.519004	0.532738	0.556183	0.535452	0.524739	0.522301	0.557367	0.551431	0.547099	0.54514
783.099	0.524912	0.534927	0.516292	0.530256	0.554716	0.533838	0.522688	0.520832	0.554994	0.549255	0.544674	0.542775
785.028	0.522191	0.531773	0.51351	0.527273	0.552423	0.531247	0.520173	0.518604	0.551765	0.545665	0.54149	0.540019
786.957	0.519581	0.528781	0.510515	0.524064	0.5494	0.52772	0.517229	0.515308	0.548194	0.541863	0.537874	0.536477
788.886	0.517222	0.526318	0.508048	0.5212	0.546745	0.525182	0.514696	0.5125	0.544992	0.5388	0.534573	0.532888
790.815	0.515114	0.524313	0.505956	0.518938	0.544446	0.523003	0.512583	0.509996	0.54216	0.535773	0.531564	0.529927
792.743	0.513398	0.522094	0.504096	0.517209	0.542798	0.521087	0.51067	0.507783	0.539548	0.53295	0.528897	0.527624
794.672	0.512216	0.520415	0.502173	0.515485	0.541479	0.519736	0.509183	0.506181	0.53721	0.530814	0.52665	0.525353
796.601	0.511414	0.519449	0.501108	0.513896	0.540561	0.518657	0.507915	0.505159	0.535528	0.529001	0.525026	0.523429
798.53	0.509961	0.517944	0.499728	0.512357	0.539705	0.517334	0.506229	0.503984	0.533874	0.526617	0.523233	0.521832
800.459	0.507785	0.515691	0.49756	0.510179	0.537377	0.515011	0.503688	0.50159	0.531144	0.523604	0.520444	0.519129
802.387	0.505576	0.51364	0.495787	0.508115	0.534054	0.512504	0.501394	0.499266	0.527759	0.521359	0.518177	0.516784
804.316	0.50332	0.511853	0.494464	0.506917	0.530764	0.510207	0.499604	0.497639	0.525404	0.519941	0.516875	0.515259
806.245	0.501063	0.510664	0.49341	0.506107	0.527503	0.50796	0.498111	0.496218	0.524385	0.518531	0.515774	0.514031
808.174	0.499303	0.509942	0.492582	0.505355	0.524677	0.505813	0.496524	0.494594	0.523192	0.517583	0.515205	0.513876
810.103	0.497591	0.508996	0.491898	0.504719	0.522026	0.503575	0.494441	0.492891	0.52194	0.516721	0.514726	0.513515
812.032	0.495876	0.507708	0.490694	0.503882	0.519013	0.501397	0.492086	0.491323	0.520995	0.515705	0.51373	0.511926
813.96	0.494116	0.506003	0.489268	0.502602	0.516058	0.499147	0.489908	0.489107	0.519304	0.514333	0.512155	0.510098
815.889	0.491552	0.503605	0.487025	0.500206	0.512939	0.496154	0.487169	0.485753	0.516424	0.511877	0.509427	0.507544
817.818	0.488016	0.499766	0.483363	0.496568	0.508796	0.491884	0.483118	0.481613	0.512354	0.507922	0.505509	0.503746
819.747	0.483502	0.495118	0.478531	0.491916	0.503878	0.486869	0.478225	0.476659	0.507038	0.502817	0.500469	0.49907
821.676	0.479085	0.490504	0.473662	0.487048	0.498841	0.48177	0.473132	0.471397	0.501735	0.497391	0.49481	0.493627
823.604	0.475149	0.486252	0.469588	0.482673	0.494269	0.476795	0.46806	0.466559	0.496711	0.492034	0.489679	0.488334
825.533	0.47152	0.482479	0.465988	0.478865	0.48977	0.472313	0.463219	0.462206	0.491485	0.487273	0.484994	0.483323
827.462	0.467965	0.478486	0.462215	0.474791	0.48485	0.467772	0.458613	0.457743	0.486442	0.482466	0.48003	0.478312
829.391	0.464485	0.474398	0.458212	0.470625	0.479843	0.46299	0.453806	0.45293	0.481428	0.476882	0.474605	0.473564
831.32	0.460808	0.470818	0.454716	0.467305	0.475024	0.458224	0.44936	0.448364	0.476198	0.47192	0.469817	0.468788
833.249	0.457478	0.467662	0.451807	0.46475	0.47069	0.454047	0.445402	0.444275	0.471388	0.468156	0.46612	0.464751
835.177	0.454902	0.465291	0.449743	0.46286	0.466766	0.450558	0.441953	0.441167	0.46762	0.46465	0.462894	0.461819
837.106	0.452889	0.463748	0.448374	0.461665	0.463704	0.447721	0.439758	0.439206	0.464909	0.461943	0.460502	0.459533
839.035	0.451396	0.462617	0.447556	0.460898	0.461391	0.445937	0.438353	0.437647	0.462822	0.460098	0.459084	0.457982
840.964	0.450385	0.462139	0.44773	0.460679	0.459907	0.444766	0.437286	0.436905	0.461451	0.458666	0.458319	0.457612
842.893	0.450335	0.462586	0.448302	0.46147	0.458918	0.444298	0.437091	0.437012	0.460884	0.45853	0.458078	0.457712
844.821	0.45074	0.46376	0.449321	0.462689	0.458809	0.44473	0.437715	0.437572	0.461058	0.459127	0.458854	0.45836
846.75	0.451333	0.464854	0.450527	0.463597	0.459591	0.445422	0.438413	0.438421	0.461902	0.459868	0.45986	0.45926
848.679	0.452192	0.465538	0.451405	0.46442	0.460209	0.446118	0.439079	0.439189	0.462391	0.460349	0.460325	0.459899
850.608	0.452128	0.465713	0.451518	0.46482	0.459811	0.445503	0.438654	0.438762	0.461252	0.459603	0.459462	0.459175
852.537	0.451093	0.46492	0.450957	0.464189	0.456932	0.44272	0.435834	0.435977	0.458469	0.456798	0.457069	0.45651
854.465	0.450236	0.464373	0.450542	0.463665	0.453266	0.439545	0.43272	0.433124	0.455626	0.453845	0.454762	0.454149
856.394	0.450626	0.465278	0.451304	0.464485	0.451474	0.437912	0.431366	0.431921	0.454387	0.453011	0.453519	0.453299
858.323	0.452738	0.467286	0.453295	0.466884	0.451605	0.437971	0.431341	0.432042	0.455251	0.453877	0.454399	0.454165
860.252	0.455567	0.470256	0.456152	0.470444	0.452617	0.439186	0.432438	0.433337	0.457126	0.456114	0.456573	0.456493
862.181	0.457882	0.472816	0.458901	0.473174	0.454405	0.441253	0.434487	0.435285	0.459144	0.458544	0.458759	0.459142
864.11	0.459028	0.474328	0.460535	0.474521	0.456177	0.443219	0.436516	0.437755	0.461231	0.460785	0.46125	0.461205
866.038	0.459466	0.475205	0.461442	0.475569	0.457707	0.444932	0.438476	0.439956	0.463106	0.462879	0.463495	0.463167
867.967	0.459661	0.475551	0.461692	0.475719	0.459781	0.447148	0.44081	0.441935	0.464855	0.464397	0.46532	0.46517
869.896	0.45938	0.4754	0.461645	0.47536	0.461629	0.44965	0.442858	0.444102	0.466856	0.46609	0.467135	0.467122
871.825	0.458796	0.475014	0.461358	0.475106	0.463029	0.451684	0.444641	0.445973	0.468377	0.4677	0.468709	0.468799
873.754	0.458047	0.474458	0.460846	0.474677	0.464191	0.452961	0.446096	0.447297	0.469097	0.468746	0.469907	0.470064
875.682	0.456962	0.473444	0.460225	0.473934	0.464631	0.45345	0.44679	0.448072	0.46957	0.46935	0.470542	0.470332
877.611	0.455296	0.47215	0.459469	0.472794	0.464032	0.452971	0.446526	0.447915	0.469236	0.468967	0.47024	0.46986
879.54	0.453753	0.470988	0.45834	0.471588	0.462525	0.451766	0.445347	0.446478	0.468061	0.46808	0.469383	0.469021
881.469	0.452711	0.469857	0.45712	0.470742	0.460818	0.450613	0.444061	0.445252	0.466883	0.46739	0.468675	0.468179
883.398	0.452233	0.469444	0.456921	0.470555	0.459822	0.449925	0.443501	0.444965	0.466223	0.467346	0.468818	0.468196
885.327	0.453241	0.470816	0.458186	0.471861	0.460009	0.450391	0.443946	0.445418	0.467172	0.468774	0.470089	0.469533
887.255	0.45511	0.473038	0.460551	0.474494	0.461212	0.451538	0.445322	0.446637	0.469625	0.471103	0.472444	0.472144
889.184	0.457657	0.475554	0.463045	0.477132	0.463092	0.452771	0.447273	0.448101	0.472086	0.473245	0.475201	0.474736
891.113	0.460028	0.477835	0.464837	0.47893	0.464814	0.453934	0.448231	0.449223	0.473792	0.474743	0.47691	0.476406
893.042	0.461232	0.47891	0.46598	0.480045	0.465645	0.454411	0.448236	0.449426	0.474352	0.475192	0.477315	0.476877
894.971	0.46207	0.47937	0.466429	0.480756	0.465726	0.454298	0.4479	0.449045	0.474582	0.474951	0.476978	0.476684
896.899	0.462348	0.479474	0.466244	0.480734	0.465013	0.45361	0.447056	0.448443	0.474248	0.474244	0.476539	0.476306
898.828	0.462106	0.479137	0.465989	0.480422	0.463909	0.45253	0.446132	0.447403	0.47303	0.473303	0.47615	0.47574
900.757	0.461721	0.478778	0.465815	0.480278	0.462722	0.45144	0.445005	0.446644	0.471963	0.472725	0.475557	0.475218
902.686	0.461819	0.478711	0.465958	0.48045	0.461615	0.450501	0.444301	0.446353	0.471584	0.472272	0.475313	0.474897
904.615	0.462378	0.479175	0.466563	0.481277	0.461323	0.450232	0.44453	0.446302	0.471899	0.472519	0.475507	0.474886
906.544	0.463603	0.480857	0.468088	0.482821	0.462057	0.451167	0.445418	0.447022	0.473026	0.473628	0.47611	0.475936
908.472	0.465975	0.483267	0.470567	0.485099	0.463656	0.453001	0.44691	0.44864	0.474861	0.475157	0.477882	0.478007
910.401	0.468962	0.485958	0.47314	0.487945	0.465811	0.455038	0.448795	0.450682	0.477003	0.477518	0.479955	0.480452
912.33	0.471668	0.4885	0.475259	0.490489	0.467558	0.456544	0.450193	0.452449	0.47856	0.479457	0.481556	0.482256
914.259	0.473768	0.490511	0.477394	0.492885	0.468433	0.45734	0.451218	0.453338	0.479575	0.480844	0.483091	0.483241
916.188	0.475844	0.49287	0.479498	0.495281	0.469084	0.457925	0.452037	0.454076	0.48066	0.481998	0.484183	0.484568
918.116	0.478198	0.495157	0.481866	0.497588	0.469852	0.458533	0.452637	0.454633	0.481779	0.482821	0.485307	0.486105
920.045	0.480413	0.497198	0.484046	0.500079	0.470641	0.459456	0.453437	0.455006	0.482843	0.483787	0.486411	0.487203
921.974	0.482157	0.499199	0.485903	0.50203	0.471049	0.460075	0.453694	0.455598	0.483431	0.484616	0.48711	0.487831
923.903	0.483612	0.500792	0.487615	0.503473	0.4713	0.460264	0.453769	0.45597	0.484195	0.485447	0.488015	0.488265
925.832	0.485185	0.502246	0.488923	0.505161	0.47224	0.461159	0.454524	0.456252	0.485398	0.486719	0.489314	0.488995
927.76	0.4872	0.504293	0.490929	0.50711	0.473866	0.462594	0.456129	0.457573	0.48746	0.488476	0.491177	0.490791
929.689	0.489784	0.506911	0.493643	0.50989	0.476272	0.464889	0.458563	0.46005	0.490678	0.491209	0.493877	0.493931
931.618	0.493111	0.510338	0.497122	0.513414	0.479816	0.468428	0.461693	0.463009	0.494543	0.495033	0.497492	0.497557
933.547	0.496379	0.514114	0.500745	0.516561	0.483261	0.472302	0.465316	0.466576	0.498572	0.499417	0.501714	0.501177
935.476	0.49927	0.517254	0.504068	0.519909	0.486797	0.476125	0.469042	0.470336	0.502832	0.504	0.506234	0.505422
937.405	0.501986	0.520148	0.50705	0.523283	0.490814	0.480116	0.472929	0.474324	0.507334	0.508322	0.510689	0.509913
939.333	0.504554	0.523205	0.509692	0.526009	0.494478	0.483875	0.477135	0.478585	0.51165	0.512623	0.515088	0.514122
941.262	0.506676	0.525704	0.512081	0.528336	0.497846	0.487551	0.480994	0.4823	0.515707	0.516875	0.519436	0.518209
943.191	0.508572	0.527621	0.514224	0.530514	0.501522	0.491659	0.48483	0.486152	0.519487	0.520907	0.523534	0.522012
945.12	0.510711	0.529901	0.516322	0.532869	0.505911	0.49583	0.489028	0.490645	0.523234	0.524759	0.527467	0.525987
947.049	0.513542	0.532842	0.51907	0.535583	0.51101	0.500241	0.493438	0.49496	0.527101	0.528548	0.531298	0.530321
948.977	0.517119	0.535902	0.522549	0.538857	0.515697	0.504319	0.497283	0.498612	0.53094	0.532048	0.534941	0.534405
950.906	0.521162	0.540008	0.52672	0.543408	0.519473	0.507814	0.500439	0.501807	0.53501	0.535726	0.538947	0.538446
952.835	0.527063	0.54607	0.532355	0.549578	0.52373	0.512007	0.504162	0.505805	0.540263	0.540601	0.544106	0.543519
954.764	0.534854	0.553782	0.539921	0.557493	0.530048	0.518029	0.50981	0.511697	0.547435	0.54787	0.55148	0.551248
956.693	0.544376	0.563222	0.549405	0.567155	0.538632	0.526258	0.517738	0.519513	0.556545	0.55747	0.560987	0.560685
958.622	0.555354	0.574403	0.560501	0.578322	0.548604	0.536471	0.527659	0.529145	0.567664	0.568521	0.572094	0.571508
960.55	0.566973	0.586699	0.572521	0.59053	0.559778	0.547748	0.538611	0.540266	0.580136	0.580769	0.584414	0.583861
962.479	0.578902	0.598965	0.584459	0.602869	0.570785	0.558409	0.549363	0.551123	0.592477	0.59335	0.596981	0.595861
964.408	0.590043	0.610725	0.595694	0.614521	0.580012	0.567928	0.558892	0.560333	0.603483	0.604691	0.608911	0.606994
966.337	0.600752	0.621451	0.606276	0.625339	0.588635	0.576978	0.567566	0.569027	0.613788	0.615001	0.619117	0.617484
968.266	0.611268	0.631748	0.616527	0.636028	0.597519	0.585684	0.576355	0.577767	0.624568	0.625357	0.629098	0.627798
970.194	0.621664	0.642472	0.626984	0.646867	0.606299	0.594388	0.585184	0.586539	0.635164	0.635662	0.640123	0.638338
972.123	0.63263	0.653887	0.638152	0.658315	0.615231	0.603478	0.593509	0.595557	0.645524	0.646175	0.650638	0.648893
974.052	0.644439	0.666215	0.650276	0.671004	0.624322	0.612751	0.602691	0.60483	0.656535	0.657267	0.661542	0.66041
975.981	0.657923	0.680161	0.664301	0.685628	0.634364	0.623087	0.613724	0.615345	0.669278	0.66981	0.674576	0.673312
977.91	0.674983	0.697586	0.681834	0.703011	0.646965	0.636283	0.626348	0.628231	0.684849	0.685202	0.690646	0.688466
979.839	0.695837	0.718778	0.702769	0.723942	0.662722	0.652463	0.641815	0.643505	0.703234	0.703864	0.709844	0.706967
981.767	0.719151	0.743068	0.726356	0.748027	0.680778	0.670089	0.658991	0.660195	0.725005	0.725217	0.731572	0.727636
983.696	0.744539	0.769101	0.751508	0.773387	0.699443	0.688051	0.676418	0.677738	0.748481	0.747956	0.754786	0.750145
985.625	0.771032	0.79571	0.777223	0.799714	0.718241	0.706059	0.693939	0.695582	0.771923	0.771211	0.77851	0.772798
987.554	0.797629	0.823257	0.803917	0.827557	0.737368	0.724708	0.712194	0.713847	0.795881	0.795168	0.802881	0.796025
989.483	0.825506	0.852107	0.832229	0.856792	0.757546	0.744673	0.731865	0.733258	0.821381	0.820217	0.828552	0.821535
991.411	0.855081	0.882045	0.861868	0.887017	0.779289	0.765999	0.753094	0.754034	0.847679	0.846606	0.855485	0.847759
993.34	0.884872	0.912412	0.891774	0.918122	0.801494	0.788498	0.775401	0.776217	0.874602	0.873622	0.88229	0.874017
995.269	0.91331	0.941863	0.921282	0.947713	0.82411	0.811252	0.797607	0.79888	0.902075	0.900874	0.909251	0.901299
997.198	0.940405	0.968896	0.948421	0.974377	0.846791	0.834043	0.820058	0.821333	0.928162	0.927369	0.935924	0.928139
999.127	0.965895	0.993971	0.973263	0.999275	0.868579	0.85653	0.842063	0.843608	0.95293	0.951499	0.960663	0.952848
1001.06	0.989189	1.01764	0.99644	1.02226	0.889212	0.877826	0.86305	0.865265	0.975706	0.975033	0.983616	0.976208
1002.98	1.0098	1.03813	1.01626	1.0424	0.908326	0.897043	0.882504	0.884606	0.996825	0.99614	1.00502	0.997414
1004.91	1.02841	1.05648	1.03449	1.05948	0.926554	0.915024	0.90025	0.902722	1.01679	1.01484	1.02429	1.01617
1006.84	1.04668	1.07376	1.05292	1.07681	0.94463	0.933375	0.9184	0.921056	1.03554	1.03454	1.04242	1.03492
1008.77	1.06478	1.09143	1.07133	1.09498	0.96379	0.952339	0.937101	0.939527	1.05447	1.05357	1.06179	1.05445
1010.7	1.0843	1.11037	1.08974	1.11288	0.983567	0.971966	0.956456	0.958024	1.07428	1.07241	1.08163	1.07391
1012.63	1.10479	1.13017	1.10972	1.13141	1.00313	0.992149	0.976433	0.977654	1.09424	1.09276	1.10195	1.09409
1014.56	1.12348	1.14928	1.12941	1.14919	1.0231	1.01249	0.996458	0.998429	1.11412	1.11343	1.12263	1.11363
1016.49	1.1399	1.16588	1.14582	1.16577	1.04304	1.03214	1.01632	1.01791	1.13411	1.13291	1.14111	1.13236
1018.41	1.15387	1.18001	1.15946	1.17997	1.06067	1.05077	1.03494	1.0358	1.15106	1.15061	1.15823	1.15054
1020.34	1.16325	1.18914	1.16935	1.18946	1.07607	1.06689	1.05153	1.05187	1.1647	1.16579	1.17178	1.16495
1022.27	1.1684	1.19411	1.17557	1.19469	1.08783	1.07999	1.06488	1.0645	1.17518	1.17663	1.18152	1.17504
1024.2	1.17166	1.19685	1.17821	1.19747	1.0961	1.08936	1.07502	1.07437	1.18156	1.18349	1.18972	1.18307
1026.13	1.17213	1.19585	1.17716	1.19688	1.10182	1.09493	1.08153	1.08186	1.18559	1.18723	1.19469	1.18713
1028.06	1.16867	1.19243	1.17258	1.19338	1.10435	1.09963	1.08517	1.08725	1.1868	1.18956	1.1974	1.18972
1029.99	1.16372	1.18867	1.16778	1.18849	1.10572	1.1029	1.08859	1.08975	1.18671	1.19039	1.19678	1.19078
1031.92	1.15743	1.18323	1.1639	1.18303	1.10585	1.10248	1.08952	1.09052	1.1861	1.18865	1.19502	1.18866
1033.85	1.15216	1.17665	1.15839	1.17823	1.10462	1.10021	1.08817	1.09034	1.18386	1.18634	1.19283	1.18791
1035.77	1.14795	1.17218	1.15389	1.17364	1.10297	1.09919	1.08751	1.0894	1.18207	1.18384	1.19007	1.18716
1037.7	1.14382	1.16959	1.15093	1.1701	1.10214	1.09992	1.0877	1.09007	1.18091	1.18208	1.18884	1.18581
1039.63	1.14241	1.16801	1.14853	1.16887	1.10176	1.10058	1.08869	1.09127	1.17975	1.18265	1.18762	1.18494
1041.56	1.14205	1.16732	1.14752	1.16888	1.10333	1.10106	1.08986	1.09308	1.17995	1.18313	1.18843	1.18454
1043.49	1.14071	1.16732	1.14665	1.16867	1.10517	1.10311	1.09172	1.09438	1.18108	1.18302	1.18963	1.1851
1045.42	1.14041	1.16718	1.14671	1.16678	1.10661	1.10599	1.09498	1.09655	1.18224	1.18416	1.1907	1.1867
1047.35	1.14002	1.16656	1.14634	1.16431	1.10884	1.10889	1.09771	1.10029	1.18289	1.18563	1.19301	1.18861
1049.28	1.13786	1.16521	1.14442	1.16366	1.11164	1.11067	1.09958	1.10323	1.18395	1.18731	1.19416	1.18988
1051.2	1.13375	1.16051	1.14061	1.16108	1.11368	1.11193	1.10224	1.1052	1.18511	1.18803	1.19435	1.19067
1053.13	1.12794	1.15473	1.13545	1.15556	1.114	1.1138	1.10396	1.10593	1.18514	1.18762	1.19333	1.19017
1055.06	1.12239	1.1487	1.129	1.14904	1.11278	1.1145	1.10405	1.10615	1.18136	1.18505	1.18972	1.18897
1056.99	1.11691	1.1424	1.12221	1.14205	1.11263	1.11404	1.1042	1.10675	1.1781	1.18168	1.1873	1.18704
1058.92	1.11097	1.13582	1.1166	1.13598	1.1124	1.11302	1.10417	1.10621	1.17632	1.17916	1.18574	1.18266
1060.85	1.10517	1.12959	1.11185	1.13151	1.11013	1.1116	1.10354	1.10537	1.17316	1.17636	1.18281	1.17892
1062.78	1.09993	1.1243	1.10594	1.12641	1.1072	1.10944	1.1013	1.1033	1.17028	1.1727	1.17821	1.17559
1064.71	1.09621	1.12019	1.10101	1.12173	1.10503	1.10699	1.09842	1.10105	1.16685	1.16836	1.17409	1.17214
1066.64	1.09365	1.1165	1.09834	1.11866	1.10292	1.10407	1.0955	1.09865	1.16166	1.1636	1.1704	1.16856
1068.56	1.09262	1.11471	1.09805	1.11682	1.09935	1.10087	1.09187	1.09557	1.15657	1.15934	1.16603	1.16421
1070.49	1.09253	1.11478	1.09869	1.11604	1.09557	1.09704	1.08755	1.09231	1.1522	1.15549	1.16158	1.16008
1072.42	1.09273	1.1155	1.09777	1.11603	1.0912	1.09229	1.0835	1.08728	1.14814	1.15175	1.1577	1.15692
1074.35	1.09136	1.11411	1.09559	1.11365	1.08504	1.08629	1.07807	1.08091	1.14338	1.14591	1.15222	1.15261
1076.28	1.08551	1.10634	1.08972	1.10628	1.07642	1.07791	1.06934	1.0723	1.13537	1.13783	1.14322	1.1441
1078.21	1.07485	1.09489	1.0784	1.09549	1.06496	1.06599	1.05704	1.0608	1.12444	1.1259	1.13095	1.13174
1080.14	1.06045	1.08165	1.06419	1.08285	1.0513	1.0519	1.04296	1.04723	1.11138	1.1119	1.11734	1.11857
1082.07	1.04433	1.06639	1.0485	1.06797	1.03733	1.03737	1.02867	1.0319	1.09671	1.09781	1.1041	1.10438
1083.99	1.02827	1.05002	1.03145	1.05119	1.02292	1.02259	1.01375	1.01707	1.08197	1.08352	1.08957	1.0893
1085.92	1.01249	1.03319	1.01494	1.03403	1.00787	1.00783	0.998952	1.00282	1.0673	1.06936	1.07467	1.07445
1087.85	0.996659	1.01649	0.999442	1.01709	0.993714	0.993537	0.9851	0.988223	1.05284	1.05514	1.06021	1.0602
1089.78	0.980274	0.999969	0.982639	1.00095	0.980258	0.979285	0.971266	0.974257	1.03853	1.04075	1.04562	1.04624
1091.71	0.963781	0.984001	0.96546	0.985279	0.966069	0.964825	0.956508	0.960424	1.02361	1.02567	1.03172	1.03158
1093.64	0.947786	0.968566	0.949556	0.969726	0.951261	0.950957	0.942246	0.94618	1.00885	1.01046	1.01751	1.01702
1095.57	0.931982	0.953125	0.934788	0.954774	0.937265	0.937251	0.928681	0.931576	0.994162	0.996409	1.00288	1.00313
1097.5	0.917037	0.938767	0.921162	0.941008	0.922759	0.922647	0.914451	0.917199	0.980376	0.983788	0.989426	0.98971
1099.43	0.904022	0.925769	0.907879	0.928481	0.908385	0.908342	0.900476	0.903756	0.967599	0.970569	0.976733	0.976228
1101.35	0.891418	0.913068	0.895285	0.916202	0.894904	0.895365	0.887592	0.890492	0.954976	0.95732	0.964609	0.963109
1103.28	0.878688	0.900796	0.883331	0.903918	0.88245	0.883063	0.875235	0.878193	0.94291	0.944799	0.952052	0.951577
1105.21	0.866088	0.888525	0.871457	0.892039	0.871249	0.87114	0.863388	0.867041	0.930584	0.932532	0.939656	0.939704
1107.14	0.854472	0.876186	0.859529	0.880286	0.860119	0.860263	0.852621	0.856313	0.918546	0.921008	0.928084	0.928068
1109.07	0.843564	0.864435	0.848516	0.868526	0.849484	0.849898	0.842629	0.845711	0.907246	0.909484	0.916587	0.916691
1111	0.832143	0.853339	0.837797	0.85714	0.839844	0.839012	0.833061	0.83528	0.896058	0.897769	0.905684	0.905181
1112.93	0.820731	0.842096	0.826246	0.845946	0.829665	0.828963	0.822588	0.824933	0.884766	0.886369	0.894147	0.893646
1114.86	0.810008	0.83077	0.815371	0.835036	0.819186	0.819248	0.811703	0.814745	0.873605	0.875178	0.882461	0.882193
1116.78	0.799636	0.820185	0.805214	0.824512	0.808781	0.808239	0.801041	0.80403	0.861422	0.863734	0.870675	0.870962
1118.71	0.789327	0.810478	0.795137	0.814517	0.798006	0.797247	0.79027	0.793199	0.849773	0.85229	0.859216	0.859672
1120.64	0.779513	0.800778	0.785294	0.804579	0.787209	0.786617	0.779342	0.782464	0.838893	0.841057	0.848131	0.848811
1122.57	0.770067	0.791168	0.77595	0.794993	0.776988	0.775753	0.768912	0.771658	0.827832	0.829905	0.837292	0.837876
1124.5	0.760278	0.781151	0.766121	0.785123	0.766219	0.764677	0.758406	0.761005	0.816471	0.818655	0.826206	0.826598
1126.43	0.750002	0.770618	0.755602	0.77461	0.754622	0.753424	0.747185	0.750106	0.804332	0.807129	0.81453	0.815249
1128.36	0.739186	0.759562	0.744731	0.763701	0.743218	0.741742	0.735188	0.738335	0.792064	0.794962	0.802102	0.803051
1130.29	0.728499	0.748848	0.734341	0.75276	0.731538	0.730216	0.723114	0.726666	0.780373	0.782843	0.789454	0.790877
1132.21	0.718921	0.739499	0.725289	0.743457	0.720215	0.71924	0.71241	0.715655	0.768925	0.771734	0.778188	0.780358
1134.14	0.711606	0.732282	0.718361	0.736723	0.710953	0.710094	0.703467	0.706387	0.759568	0.762774	0.769132	0.771272
1136.07	0.70714	0.728139	0.714307	0.73239	0.703974	0.703083	0.696505	0.699599	0.753213	0.756083	0.762519	0.764321
1138	0.70593	0.727376	0.713479	0.731256	0.699459	0.698479	0.691989	0.695147	0.749385	0.752332	0.758722	0.760468
1139.93	0.707889	0.729523	0.715431	0.733251	0.698046	0.696686	0.689952	0.693003	0.74846	0.751666	0.757799	0.759041
1141.86	0.712001	0.733908	0.719678	0.737698	0.698967	0.697379	0.690192	0.693106	0.750202	0.753141	0.75954	0.760065
1143.79	0.717687	0.739979	0.72513	0.743544	0.701398	0.699774	0.692053	0.695171	0.753638	0.756473	0.762792	0.763091
1145.72	0.724126	0.746484	0.731161	0.749243	0.704952	0.702884	0.694554	0.697721	0.757652	0.760863	0.766837	0.766422
1147.65	0.729523	0.75146	0.73613	0.754073	0.708463	0.705929	0.697179	0.69977	0.761358	0.764651	0.770312	0.769391
1149.57	0.732588	0.754171	0.738624	0.756613	0.710855	0.707749	0.698737	0.700811	0.7639	0.766387	0.77215	0.770924
1151.5	0.732358	0.753954	0.738111	0.755766	0.711072	0.707464	0.698349	0.700084	0.764063	0.765999	0.771751	0.770569
1153.43	0.728716	0.750199	0.734126	0.751855	0.708942	0.704869	0.695789	0.697335	0.76151	0.763462	0.76893	0.767435
1155.36	0.722144	0.743492	0.727349	0.745076	0.70435	0.700407	0.691096	0.692503	0.7567	0.75843	0.763715	0.761527
1157.29	0.71296	0.734424	0.718074	0.735545	0.698136	0.693955	0.684865	0.685775	0.749484	0.751198	0.756329	0.754061
1159.22	0.701833	0.722708	0.706514	0.72347	0.69062	0.686056	0.677237	0.677857	0.740139	0.741737	0.746928	0.744691
1161.15	0.688745	0.708862	0.693235	0.709803	0.681626	0.677065	0.668124	0.668885	0.728583	0.729784	0.734916	0.733232
1163.08	0.673589	0.693541	0.678599	0.694612	0.671454	0.66663	0.657795	0.658501	0.715138	0.716447	0.721402	0.719972
1165	0.657578	0.677276	0.662766	0.678001	0.660065	0.655082	0.646495	0.647086	0.700446	0.701798	0.706205	0.705717
1166.93	0.641458	0.660967	0.646623	0.661447	0.648133	0.643129	0.634763	0.635412	0.684865	0.686539	0.690657	0.690629
1168.86	0.625553	0.644766	0.630831	0.645421	0.636279	0.631275	0.623172	0.623649	0.669482	0.67132	0.675709	0.675731
1170.79	0.610116	0.62909	0.615431	0.629743	0.624038	0.619019	0.61102	0.611688	0.654179	0.656161	0.660569	0.661481
1172.72	0.594388	0.613372	0.600262	0.614252	0.611052	0.605813	0.598148	0.599045	0.6383	0.64081	0.645114	0.646368
1174.65	0.578484	0.597417	0.584964	0.598799	0.596632	0.59131	0.58388	0.58516	0.621883	0.624452	0.628688	0.630118
1176.58	0.564074	0.583041	0.570712	0.58456	0.582081	0.577297	0.569964	0.571621	0.6066	0.609199	0.61328	0.615243
1178.51	0.551986	0.571122	0.55909	0.572993	0.570202	0.565807	0.558701	0.560448	0.593735	0.596939	0.600864	0.603269
1180.44	0.542584	0.561907	0.550265	0.564404	0.561371	0.557029	0.550035	0.552084	0.583537	0.587527	0.591312	0.594005
1182.36	0.536085	0.555415	0.544094	0.558136	0.55497	0.550764	0.543775	0.546066	0.576446	0.580639	0.584538	0.587239
1184.29	0.532198	0.551462	0.540177	0.553885	0.550861	0.546819	0.539786	0.542168	0.571923	0.576186	0.580143	0.582774
1186.22	0.530095	0.549362	0.537972	0.551493	0.548768	0.544609	0.537612	0.540024	0.569414	0.573396	0.577223	0.580085
1188.15	0.529422	0.548387	0.536857	0.550529	0.54799	0.543604	0.536414	0.538928	0.568261	0.571605	0.575798	0.578505
1190.08	0.530046	0.548677	0.536825	0.550612	0.548342	0.543626	0.535995	0.538495	0.568016	0.571404	0.575524	0.5779
1192.01	0.531317	0.549836	0.537778	0.551531	0.549552	0.544335	0.53637	0.538721	0.568615	0.57217	0.575719	0.578048
1193.94	0.53345	0.55164	0.539366	0.55309	0.551278	0.545851	0.537719	0.539953	0.569932	0.573342	0.576882	0.578967
1195.87	0.536174	0.554121	0.541707	0.555258	0.553967	0.54828	0.539946	0.542024	0.572261	0.57531	0.578768	0.580832
1197.79	0.539106	0.556899	0.544432	0.557849	0.557357	0.551252	0.542584	0.544649	0.574894	0.577847	0.581025	0.583206
1199.72	0.542508	0.559923	0.54716	0.560579	0.560774	0.55456	0.545631	0.547693	0.577786	0.58064	0.583847	0.586037
1201.65	0.545876	0.562992	0.550095	0.563537	0.564152	0.557949	0.54908	0.551084	0.58092	0.583515	0.586994	0.588867
1203.58	0.549005	0.566062	0.553218	0.566439	0.567415	0.561128	0.552574	0.554406	0.583774	0.586501	0.590045	0.591546
1205.51	0.551744	0.568965	0.556151	0.569207	0.570505	0.564492	0.556	0.557629	0.586588	0.589425	0.592638	0.5944
1207.44	0.554538	0.571683	0.559065	0.572008	0.573759	0.56806	0.559352	0.561113	0.589613	0.592362	0.595491	0.597166
1209.37	0.557921	0.574913	0.562374	0.575116	0.577552	0.571826	0.56314	0.564843	0.593333	0.595866	0.598952	0.600714
1211.3	0.561712	0.578864	0.566417	0.578935	0.581979	0.576049	0.567519	0.569006	0.597776	0.600251	0.602805	0.605181
1213.23	0.565778	0.583177	0.570701	0.583123	0.586448	0.580589	0.572245	0.573644	0.602676	0.604912	0.607611	0.609937
1215.15	0.570413	0.587969	0.57557	0.587912	0.591323	0.585939	0.577808	0.579148	0.60826	0.610631	0.61351	0.615464
1217.08	0.575661	0.593488	0.581191	0.593632	0.597171	0.592183	0.584037	0.585626	0.614488	0.617335	0.619904	0.62168
1219.01	0.581342	0.599445	0.587023	0.599466	0.603148	0.598601	0.590304	0.592118	0.620915	0.62391	0.626652	0.628142
1220.94	0.587028	0.605284	0.592916	0.605188	0.608775	0.604725	0.596412	0.598316	0.627367	0.630413	0.633294	0.634801
1222.87	0.592371	0.610683	0.598535	0.610869	0.614235	0.610643	0.602431	0.604328	0.633558	0.636559	0.639365	0.641334
1224.8	0.597334	0.615781	0.603751	0.616066	0.619646	0.616089	0.607988	0.609657	0.639045	0.642373	0.644823	0.64696
1226.73	0.601973	0.620413	0.608209	0.620664	0.624376	0.62082	0.612749	0.6145	0.644068	0.647758	0.649934	0.651855
1228.66	0.606559	0.624797	0.612524	0.624986	0.628884	0.62554	0.617452	0.619525	0.648942	0.652571	0.655114	0.656827
1230.58	0.610628	0.62885	0.616392	0.628965	0.633186	0.629968	0.621922	0.623941	0.653329	0.656873	0.659541	0.661227
1232.51	0.613956	0.63197	0.619348	0.632278	0.636845	0.633579	0.625433	0.627558	0.656988	0.660529	0.663142	0.665137
1234.44	0.616166	0.633852	0.621445	0.634404	0.639508	0.636083	0.628093	0.630253	0.659539	0.662948	0.665412	0.668058
1236.37	0.617083	0.634749	0.622368	0.635251	0.640766	0.637291	0.629398	0.631537	0.660894	0.664267	0.666466	0.669004
1238.3	0.616878	0.634316	0.621762	0.634685	0.64072	0.637314	0.629205	0.631671	0.660681	0.664063	0.666355	0.668511
1240.23	0.615384	0.632501	0.620058	0.6328	0.639611	0.63602	0.627853	0.63018	0.659018	0.662339	0.664745	0.667018
1242.16	0.612872	0.629691	0.617367	0.629793	0.637597	0.633569	0.625404	0.62733	0.656407	0.659516	0.661997	0.664279
1244.09	0.609348	0.625723	0.613321	0.625827	0.63424	0.630027	0.621722	0.623283	0.6525	0.655333	0.657698	0.660034
1246.02	0.605201	0.621243	0.608668	0.621475	0.629902	0.625515	0.61731	0.618724	0.647907	0.650273	0.65272	0.655396
1247.94	0.600818	0.616678	0.603999	0.616891	0.625655	0.621027	0.613046	0.614482	0.6433	0.6455	0.648365	0.65099
1249.87	0.595995	0.611862	0.599425	0.612205	0.621323	0.616706	0.608596	0.610088	0.638684	0.641158	0.644041	0.646388
1251.8	0.591307	0.607209	0.594928	0.607755	0.616705	0.612272	0.604106	0.60562	0.633816	0.636562	0.639064	0.641683
1253.73	0.586794	0.603173	0.590793	0.603677	0.612476	0.608136	0.600013	0.601481	0.628936	0.632133	0.634435	0.63729
1255.66	0.5828	0.599337	0.586762	0.599658	0.608473	0.604065	0.596284	0.597647	0.624689	0.6276	0.63043	0.632908
1257.59	0.579571	0.59575	0.583372	0.596319	0.605256	0.600669	0.593141	0.594432	0.620972	0.623744	0.626785	0.629178
1259.52	0.575997	0.592146	0.580567	0.593184	0.602543	0.597498	0.590016	0.591379	0.617241	0.620271	0.622876	0.625548
1261.45	0.572126	0.588296	0.576645	0.589137	0.598378	0.593354	0.586174	0.587597	0.613098	0.61602	0.618683	0.621251
1263.37	0.568532	0.584705	0.573007	0.585256	0.594265	0.589564	0.582569	0.584097	0.609619	0.612361	0.615311	0.617839
1265.3	0.564716	0.581039	0.569586	0.581554	0.59044	0.585618	0.578539	0.580274	0.605924	0.608864	0.611893	0.614675
1267.23	0.560496	0.577054	0.565765	0.577718	0.585781	0.580753	0.573999	0.575715	0.601949	0.604898	0.607887	0.610833
1269.16	0.556534	0.573417	0.562476	0.574339	0.581638	0.576494	0.569871	0.571613	0.598264	0.601202	0.604252	0.60714
1271.09	0.552984	0.570016	0.559223	0.57116	0.577629	0.572391	0.565666	0.567692	0.594368	0.597562	0.600954	0.603658
1273.02	0.549908	0.566872	0.555789	0.568203	0.57304	0.568384	0.561644	0.563915	0.590696	0.594023	0.597549	0.600161
1274.95	0.547628	0.564666	0.553025	0.565901	0.569525	0.565603	0.558718	0.561221	0.588144	0.591685	0.594977	0.597719
1276.88	0.545719	0.562573	0.551066	0.563973	0.567018	0.563206	0.55634	0.55893	0.58616	0.58961	0.59262	0.595796
1278.81	0.543805	0.560619	0.54933	0.562258	0.565064	0.560914	0.554106	0.556712	0.583851	0.587182	0.590348	0.593733
1280.73	0.541779	0.558654	0.547324	0.560258	0.562881	0.558595	0.551839	0.554489	0.581593	0.584817	0.588285	0.591421
1282.66	0.539981	0.556824	0.545398	0.558514	0.560515	0.556461	0.549854	0.552432	0.579558	0.58302	0.586489	0.589487
1284.59	0.538695	0.555802	0.544405	0.557496	0.559343	0.555354	0.548765	0.55121	0.578339	0.582188	0.585501	0.588472
1286.52	0.538232	0.555371	0.544846	0.55738	0.559709	0.55557	0.548866	0.551223	0.578378	0.582123	0.58544	0.588711
1288.45	0.537882	0.555044	0.544968	0.557165	0.559586	0.555259	0.548631	0.551065	0.578001	0.581655	0.585123	0.588452
1290.38	0.537944	0.55524	0.54463	0.557218	0.558856	0.554902	0.548381	0.551064	0.577796	0.581551	0.585327	0.588233
1292.31	0.538623	0.555989	0.544939	0.558287	0.558895	0.555519	0.549009	0.551991	0.578445	0.582437	0.586444	0.589125
1294.24	0.54016	0.557416	0.546323	0.559951	0.560358	0.557144	0.550772	0.553779	0.580066	0.584355	0.588332	0.591317
1296.16	0.542288	0.559481	0.548553	0.562081	0.56264	0.559498	0.55317	0.556013	0.582308	0.586579	0.590465	0.593921
1298.09	0.544509	0.561725	0.55054	0.564187	0.564611	0.561723	0.555348	0.558406	0.58468	0.588731	0.592616	0.5961
1300.02	0.546702	0.563958	0.552551	0.566191	0.566671	0.563947	0.557668	0.560735	0.587	0.59113	0.595365	0.598462
1301.95	0.548355	0.565687	0.554342	0.567892	0.568579	0.565969	0.559768	0.562673	0.588987	0.59337	0.597701	0.600445
1303.88	0.549422	0.566673	0.555439	0.568988	0.56983	0.567046	0.560962	0.564027	0.590707	0.594905	0.599021	0.601878
1305.81	0.549975	0.567213	0.556268	0.569775	0.570833	0.567814	0.561843	0.565013	0.591872	0.596016	0.600236	0.603215
1307.74	0.549675	0.567068	0.556587	0.569784	0.571003	0.567913	0.562048	0.565239	0.591634	0.596201	0.600522	0.603493
1309.67	0.549098	0.566795	0.556109	0.569507	0.570321	0.56749	0.56183	0.565024	0.591366	0.595929	0.600449	0.603664
1311.59	0.548449	0.56653	0.556918	0.569653	0.571385	0.567911	0.562322	0.565357	0.591881	0.596344	0.601043	0.604614
1313.52	0.546278	0.564703	0.556175	0.567992	0.570453	0.566551	0.560567	0.563823	0.590049	0.594399	0.598991	0.602633
1315.45	0.544441	0.563111	0.554213	0.566202	0.568018	0.564615	0.558522	0.561971	0.588145	0.592535	0.597141	0.60079
1317.38	0.542616	0.561871	0.553653	0.565118	0.567577	0.563361	0.557524	0.560883	0.58715	0.59167	0.596299	0.600205
1319.31	0.53946	0.558884	0.550876	0.562319	0.563873	0.559585	0.554089	0.5576	0.583371	0.587734	0.592485	0.596631
1321.24	0.537513	0.556528	0.546982	0.559966	0.558571	0.556065	0.550842	0.554691	0.579589	0.584374	0.589405	0.593608
1323.17	0.536836	0.555605	0.54524	0.559149	0.555977	0.554428	0.549445	0.553544	0.577969	0.583175	0.588591	0.592608
1325.1	0.53681	0.555308	0.544885	0.55914	0.554921	0.553566	0.548559	0.553002	0.576973	0.582362	0.588058	0.591841
1327.03	0.53759	0.556195	0.545548	0.559907	0.554999	0.553777	0.548562	0.553396	0.577079	0.582539	0.588161	0.592112
1328.95	0.539034	0.557543	0.547001	0.561224	0.556098	0.55471	0.54962	0.554568	0.578149	0.583591	0.589333	0.593329
1330.88	0.540608	0.558989	0.548606	0.562755	0.557263	0.555929	0.550934	0.555871	0.579309	0.584707	0.59047	0.59466
1332.81	0.542455	0.560947	0.550558	0.56471	0.559009	0.55803	0.552895	0.557775	0.581096	0.586443	0.592166	0.596863
1334.74	0.544807	0.563436	0.553704	0.567303	0.562907	0.561357	0.555985	0.560823	0.584102	0.589491	0.595245	0.600102
1336.67	0.547173	0.566339	0.558979	0.570509	0.569734	0.565935	0.560424	0.565086	0.588482	0.593926	0.599515	0.604401
1338.6	0.547585	0.567748	0.564188	0.572375	0.577065	0.5696	0.564109	0.568257	0.591057	0.596631	0.601737	0.606705
1340.53	0.544672	0.564411	0.559952	0.568783	0.571723	0.565347	0.560332	0.564701	0.585756	0.591485	0.596569	0.60158
1342.46	0.544742	0.562984	0.554304	0.567372	0.564911	0.563015	0.558772	0.563643	0.584011	0.59011	0.596163	0.600978
1344.38	0.54559	0.56345	0.553495	0.567922	0.564929	0.564477	0.560274	0.565331	0.585383	0.591514	0.597896	0.602893
1346.31	0.545089	0.563145	0.553078	0.567893	0.56546	0.565309	0.560782	0.566084	0.585326	0.591364	0.59764	0.603212
1348.24	0.545071	0.563571	0.553886	0.568631	0.566938	0.566668	0.562337	0.567517	0.586504	0.59247	0.598838	0.604439
1350.17	0.544942	0.563821	0.554403	0.568733	0.566917	0.567144	0.562988	0.568295	0.587148	0.593059	0.599344	0.605111
1352.1	0.546183	0.565315	0.555916	0.570443	0.568245	0.569016	0.564866	0.57053	0.589368	0.595627	0.601831	0.607569
1354.03	0.547765	0.567538	0.559194	0.573068	0.571687	0.571948	0.568105	0.57379	0.592333	0.599092	0.605446	0.610887
1355.96	0.550201	0.570415	0.562257	0.575906	0.574398	0.575156	0.571741	0.577234	0.595496	0.602355	0.608775	0.614218
1357.89	0.554463	0.574998	0.566543	0.580574	0.5789	0.58043	0.577258	0.582393	0.60097	0.607718	0.614044	0.619433
1359.82	0.560649	0.582405	0.575135	0.588365	0.58892	0.589589	0.586197	0.591274	0.61044	0.617255	0.623592	0.628591
1361.74	0.566283	0.590178	0.586283	0.5964	0.601561	0.599313	0.595829	0.600474	0.620094	0.626828	0.632724	0.637215
1363.67	0.57187	0.595344	0.590599	0.600889	0.605359	0.604376	0.600982	0.605518	0.623924	0.630581	0.636138	0.640658
1365.6	0.582299	0.60441	0.595991	0.609476	0.611476	0.613771	0.610364	0.615522	0.63365	0.64061	0.646661	0.651176
1367.53	0.591404	0.614045	0.605995	0.619261	0.623622	0.625167	0.622181	0.627267	0.645347	0.652715	0.658549	0.663208
1369.46	0.595694	0.618117	0.610628	0.623362	0.629171	0.631027	0.627644	0.633035	0.649699	0.657349	0.662961	0.667517
1371.39	0.60198	0.624326	0.616455	0.629627	0.637196	0.639879	0.636024	0.641568	0.658316	0.665848	0.671935	0.676221
1373.32	0.606454	0.630606	0.625074	0.636114	0.649299	0.648707	0.645487	0.650538	0.666886	0.674386	0.680239	0.684681
1375.25	0.60923	0.633294	0.627485	0.638284	0.652116	0.651961	0.648536	0.654155	0.668617	0.675922	0.68128	0.686229
1377.17	0.616839	0.63967	0.632058	0.644218	0.657308	0.659748	0.65633	0.661861	0.676419	0.683406	0.689126	0.694189
1379.1	0.622221	0.644338	0.636293	0.648761	0.663548	0.666597	0.663672	0.668799	0.682675	0.689591	0.695671	0.700328
1381.03	0.625499	0.647193	0.638083	0.651515	0.667321	0.671273	0.668458	0.67409	0.686693	0.69366	0.699681	0.704781
1382.96	0.629448	0.650993	0.64116	0.655192	0.673037	0.677815	0.674759	0.681037	0.692382	0.699382	0.70506	0.710934
1384.89	0.634377	0.656415	0.647859	0.661308	0.683688	0.687219	0.684763	0.690442	0.701197	0.708556	0.714201	0.720125
1386.82	0.634145	0.657248	0.651853	0.662619	0.690297	0.690745	0.689211	0.694622	0.703314	0.710959	0.716148	0.722411
1388.75	0.631373	0.653695	0.647021	0.658103	0.684563	0.687536	0.685612	0.692219	0.698313	0.705471	0.71101	0.717262
1390.68	0.635012	0.656553	0.648014	0.660898	0.686988	0.692579	0.690556	0.69734	0.703251	0.710422	0.716733	0.722897
1392.61	0.639264	0.662142	0.654894	0.667337	0.697108	0.701255	0.699879	0.705784	0.712272	0.719845	0.725896	0.732667
1394.53	0.637503	0.66293	0.659092	0.66859	0.703135	0.703461	0.702609	0.707701	0.713635	0.721627	0.726292	0.733978
1396.46	0.637993	0.662654	0.659031	0.668091	0.703902	0.703052	0.701671	0.707302	0.713411	0.720983	0.725055	0.73266
1398.39	0.63971	0.663726	0.659348	0.669263	0.704414	0.704047	0.70299	0.70873	0.715033	0.722573	0.727211	0.734492
1400.32	0.636656	0.658197	0.651512	0.662607	0.693512	0.696593	0.694974	0.701612	0.70643	0.714162	0.718985	0.726187
1402.25	0.639442	0.659416	0.651051	0.663936	0.69381	0.698707	0.697033	0.703695	0.709718	0.717167	0.722742	0.729943
1404.18	0.635916	0.657511	0.650598	0.662226	0.693873	0.695869	0.694312	0.700569	0.708073	0.714821	0.720412	0.727776
1406.11	0.628841	0.649305	0.641576	0.65325	0.682441	0.684196	0.682115	0.688575	0.696855	0.702896	0.707969	0.715414
1408.04	0.627329	0.645987	0.63682	0.649818	0.677042	0.680021	0.677634	0.683997	0.693524	0.699967	0.705215	0.71232
1409.96	0.623218	0.642005	0.63379	0.645875	0.673432	0.675063	0.672119	0.677993	0.689233	0.69565	0.700646	0.707464
1411.89	0.616683	0.635439	0.626874	0.638659	0.665503	0.665505	0.661606	0.667423	0.680783	0.686584	0.691056	0.69777
1413.82	0.612097	0.630618	0.620809	0.633453	0.659042	0.658561	0.654216	0.659939	0.67535	0.681098	0.685217	0.691614
1415.75	0.608798	0.628108	0.620394	0.631224	0.659539	0.656212	0.651262	0.65626	0.67414	0.679763	0.683517	0.689756
1417.68	0.602572	0.624121	0.62042	0.627971	0.660829	0.651971	0.646777	0.650795	0.670811	0.676446	0.679424	0.685414
1419.61	0.585281	0.606206	0.601777	0.608682	0.636576	0.627401	0.621469	0.626364	0.646132	0.651123	0.652789	0.658287
1421.54	0.582118	0.600687	0.592748	0.602144	0.626513	0.619999	0.613521	0.618591	0.640182	0.645042	0.647206	0.652261
1423.47	0.578064	0.596935	0.58953	0.598561	0.623457	0.615509	0.609077	0.61306	0.636843	0.641517	0.643731	0.648423
1425.4	0.570737	0.588126	0.578941	0.589246	0.61051	0.604154	0.59678	0.600877	0.624538	0.628838	0.631284	0.635714
1427.32	0.572332	0.588959	0.5783	0.590189	0.610605	0.605186	0.597648	0.601191	0.626335	0.630762	0.633766	0.637366
1429.25	0.571545	0.589783	0.581086	0.591023	0.613626	0.60597	0.59869	0.601376	0.627571	0.631666	0.634385	0.637478
1431.18	0.572188	0.590216	0.581708	0.590756	0.613158	0.605545	0.597718	0.600637	0.625933	0.6299	0.632647	0.635903
1433.11	0.578956	0.596368	0.586977	0.596828	0.620106	0.612594	0.603977	0.607031	0.632853	0.637015	0.639868	0.643095
1435.04	0.585651	0.604532	0.596325	0.605607	0.632575	0.622413	0.614326	0.616918	0.643925	0.648335	0.651161	0.654109
1436.97	0.582638	0.602111	0.595707	0.60296	0.62983	0.619491	0.611734	0.615349	0.638018	0.643132	0.645319	0.648497
1438.9	0.585698	0.602882	0.59319	0.60322	0.625607	0.619653	0.611472	0.615438	0.637356	0.642313	0.644688	0.648097
1440.83	0.592425	0.60869	0.597155	0.60918	0.630418	0.62624	0.618362	0.621831	0.645014	0.64951	0.652387	0.656218
1442.75	0.594518	0.611	0.599509	0.611634	0.632763	0.629017	0.621385	0.625036	0.647207	0.651886	0.654665	0.658815
1444.68	0.59811	0.615251	0.604241	0.616274	0.638261	0.63424	0.62689	0.630717	0.652862	0.657703	0.660598	0.66444
1446.61	0.600221	0.619379	0.610434	0.620984	0.64575	0.639677	0.632957	0.636513	0.658763	0.663605	0.666185	0.669896
1448.54	0.598942	0.618852	0.610887	0.620524	0.644978	0.638699	0.632121	0.636054	0.656409	0.661816	0.663992	0.667878
1450.47	0.603416	0.62279	0.613821	0.624333	0.647562	0.642843	0.635948	0.640103	0.660662	0.666447	0.668728	0.672508
1452.4	0.608162	0.628474	0.620291	0.630253	0.655278	0.649643	0.642764	0.646408	0.667739	0.673325	0.675986	0.679422
1454.33	0.612899	0.635468	0.629586	0.63857	0.667878	0.658643	0.652372	0.65511	0.678634	0.683703	0.687283	0.690518
1456.26	0.604753	0.633237	0.633174	0.637911	0.674849	0.658369	0.654386	0.655481	0.679645	0.684985	0.687818	0.691655
1458.18	0.579701	0.60994	0.610755	0.612651	0.643528	0.628132	0.624175	0.62649	0.646144	0.651988	0.651992	0.657646
1460.11	0.581181	0.604469	0.59811	0.60615	0.627865	0.621168	0.615767	0.619685	0.63901	0.645058	0.64636	0.651865
1462.04	0.585456	0.606541	0.596915	0.608415	0.628477	0.624916	0.618945	0.62288	0.644372	0.650333	0.653008	0.657988
1463.97	0.579496	0.603221	0.595495	0.605821	0.628404	0.622905	0.617459	0.621318	0.642525	0.648791	0.651655	0.656501
1465.9	0.566562	0.590007	0.582948	0.592256	0.612514	0.608152	0.602911	0.607177	0.625536	0.632395	0.634616	0.639975
1467.83	0.557642	0.579112	0.570015	0.58106	0.600276	0.598452	0.593287	0.597572	0.615365	0.622098	0.625019	0.630595
1469.76	0.544114	0.566563	0.558556	0.56976	0.594268	0.590202	0.585948	0.589717	0.607639	0.614086	0.617853	0.623681
1471.69	0.517901	0.54465	0.543334	0.55012	0.585253	0.574223	0.571789	0.575114	0.589314	0.596133	0.599457	0.606352
1473.62	0.480216	0.507171	0.50834	0.511891	0.548109	0.536215	0.533699	0.537875	0.54675	0.553261	0.555653	0.563015
1475.54	0.465948	0.489981	0.488558	0.494563	0.527031	0.51947	0.517108	0.521753	0.528709	0.535139	0.538562	0.546278
1477.47	0.452356	0.473771	0.469496	0.478081	0.505807	0.502692	0.500678	0.506169	0.510764	0.517406	0.521589	0.529775
1479.4	0.447741	0.468417	0.462996	0.473125	0.499034	0.498586	0.496779	0.502437	0.506422	0.513263	0.518447	0.526594
1481.33	0.443234	0.464713	0.460352	0.469728	0.495316	0.495213	0.493588	0.499301	0.502288	0.509422	0.514588	0.52302
1483.26	0.443838	0.464659	0.45933	0.469604	0.493771	0.495467	0.493501	0.499975	0.50163	0.509142	0.514603	0.523234
1485.19	0.449638	0.471609	0.467851	0.477552	0.504481	0.505236	0.50339	0.509795	0.511291	0.519066	0.525259	0.533844
1487.12	0.456994	0.482669	0.483496	0.489927	0.523451	0.520126	0.518434	0.524323	0.525958	0.533392	0.53931	0.548171
1489.05	0.46609	0.494695	0.49976	0.503019	0.542968	0.534156	0.533357	0.538769	0.539834	0.54775	0.55275	0.561612
1490.97	0.478453	0.504665	0.506738	0.511811	0.546605	0.541772	0.540867	0.547136	0.545643	0.554145	0.558705	0.567871
1492.9	0.497338	0.520735	0.516868	0.526499	0.556745	0.558246	0.556777	0.563335	0.563131	0.571023	0.577137	0.586231
1494.83	0.51646	0.541907	0.53861	0.548192	0.582826	0.582283	0.581645	0.587167	0.589133	0.596831	0.60333	0.612315
1496.76	0.531299	0.559884	0.560247	0.566588	0.60685	0.602549	0.602074	0.607043	0.607937	0.615991	0.620999	0.630178
1498.69	0.547595	0.575089	0.574709	0.58079	0.6202	0.617879	0.61655	0.621766	0.62175	0.629723	0.634662	0.643616
1500.62	0.567449	0.59255	0.590458	0.597384	0.636505	0.636448	0.634541	0.639919	0.639248	0.646981	0.65248	0.661046
1502.55	0.588875	0.613856	0.610205	0.618509	0.659698	0.660008	0.657304	0.662702	0.66312	0.670718	0.676512	0.684283
1504.48	0.610916	0.639587	0.637744	0.646631	0.694017	0.69048	0.688725	0.692686	0.696407	0.703842	0.709768	0.717175
1506.41	0.624344	0.660976	0.672794	0.670497	0.733302	0.717452	0.717665	0.718614	0.721183	0.72839	0.730356	0.740852
1508.33	0.641591	0.675099	0.68756	0.679718	0.743398	0.727167	0.723396	0.725852	0.723489	0.729365	0.728575	0.738038
1510.26	0.671968	0.700279	0.703931	0.703597	0.760932	0.752749	0.74892	0.751871	0.750132	0.756027	0.757804	0.765766
1512.19	0.697044	0.723614	0.722108	0.725553	0.778466	0.775519	0.772092	0.775058	0.772145	0.778542	0.780834	0.788907
1514.12	0.722056	0.748917	0.746475	0.751596	0.807624	0.803617	0.800538	0.803012	0.800426	0.80737	0.809981	0.817094
1516.05	0.73509	0.765295	0.767107	0.768655	0.831373	0.822089	0.818902	0.820619	0.818148	0.824611	0.825891	0.833098
1517.98	0.739989	0.770143	0.770705	0.771358	0.83341	0.824302	0.819628	0.822515	0.818365	0.824365	0.824067	0.831035
1519.91	0.755871	0.787074	0.787305	0.789592	0.857584	0.845479	0.844535	0.845136	0.841998	0.848571	0.850075	0.855906
1521.84	0.749108	0.783427	0.787294	0.784313	0.854918	0.837821	0.838504	0.83627	0.830961	0.836976	0.83616	0.845176
1523.76	0.763018	0.792259	0.792396	0.791996	0.859446	0.846869	0.843195	0.843446	0.838819	0.844104	0.843124	0.8518
1525.69	0.781157	0.808637	0.80778	0.807972	0.877828	0.864985	0.861564	0.861031	0.857788	0.861762	0.862137	0.869084
1527.62	0.789236	0.815337	0.811645	0.811865	0.878446	0.867505	0.863607	0.863454	0.858899	0.863004	0.861946	0.868774
1529.55	0.807385	0.829934	0.822156	0.825696	0.889509	0.88287	0.878114	0.879107	0.874428	0.878891	0.877598	0.883669
1531.48	0.829344	0.852158	0.844742	0.849104	0.917579	0.909968	0.906011	0.905292	0.903623	0.907741	0.907192	0.911945
1533.41	0.831578	0.85707	0.853367	0.854177	0.924757	0.913266	0.909548	0.907964	0.905706	0.909825	0.907651	0.913825
1535.34	0.845656	0.868574	0.86065	0.862774	0.931772	0.923518	0.917262	0.916665	0.914354	0.918553	0.913945	0.921932
1537.27	0.872429	0.896264	0.885945	0.891321	0.966568	0.958154	0.952126	0.948225	0.952412	0.955489	0.951584	0.960067
1539.2	0.859036	0.891124	0.889794	0.890795	0.975505	0.959744	0.960042	0.948263	0.952793	0.953149	0.948525	0.964288
1541.12	0.821808	0.854621	0.85675	0.852234	0.930055	0.908572	0.90879	0.902172	0.90024	0.900958	0.894923	0.910042
1543.05	0.82709	0.854226	0.8548	0.850925	0.929379	0.909795	0.908553	0.903448	0.902202	0.903848	0.900001	0.911307
1544.98	0.815369	0.837067	0.834474	0.830087	0.904109	0.888364	0.884085	0.880663	0.879787	0.881668	0.876456	0.8848
1546.91	0.814779	0.832641	0.823111	0.824992	0.896163	0.887154	0.881251	0.880018	0.878939	0.88035	0.876467	0.883643
1548.84	0.811385	0.830012	0.821112	0.823379	0.898446	0.888749	0.884786	0.88171	0.882224	0.882617	0.879695	0.887781
1550.77	0.787887	0.806391	0.798393	0.79908	0.875721	0.863984	0.860483	0.858406	0.856998	0.857909	0.854218	0.861854
1552.7	0.780128	0.799046	0.790285	0.794057	0.872114	0.861825	0.858496	0.857081	0.855918	0.85747	0.853937	0.862206
1554.63	0.758697	0.780828	0.775835	0.778029	0.861411	0.84805	0.845018	0.843445	0.842664	0.843731	0.840076	0.849926
1556.55	0.751366	0.775913	0.771564	0.774053	0.86242	0.846759	0.842751	0.841678	0.843731	0.843904	0.841587	0.851073
1558.48	0.724702	0.758339	0.76214	0.759412	0.849387	0.83236	0.833256	0.828795	0.828378	0.828566	0.826572	0.842112
1560.41	0.675213	0.701415	0.700269	0.699015	0.772205	0.761724	0.760754	0.760859	0.754086	0.756084	0.752059	0.766459
1562.34	0.688302	0.709222	0.701756	0.708124	0.781986	0.775993	0.774487	0.776142	0.771655	0.773758	0.772799	0.784107
1564.27	0.683915	0.705279	0.69788	0.705251	0.778348	0.773755	0.773161	0.775067	0.7707	0.773508	0.773329	0.784727
1566.2	0.676015	0.696626	0.688866	0.697052	0.768882	0.765772	0.764873	0.767665	0.762574	0.765663	0.765651	0.777556
1568.13	0.675548	0.698007	0.690974	0.699761	0.774679	0.770938	0.771424	0.773494	0.769443	0.771919	0.773101	0.784974
1570.06	0.658634	0.68316	0.678197	0.684513	0.75471	0.750722	0.751794	0.754738	0.748568	0.751827	0.75221	0.765286
1571.99	0.658932	0.680302	0.672476	0.681661	0.748316	0.747616	0.747303	0.751488	0.7453	0.74913	0.750172	0.762785
1573.91	0.667028	0.690247	0.681999	0.693649	0.763401	0.761826	0.762738	0.766241	0.762413	0.766198	0.768756	0.78114
1575.84	0.655349	0.683551	0.679104	0.687738	0.757243	0.752622	0.755377	0.758934	0.753022	0.758011	0.760133	0.773979
1577.77	0.645207	0.670331	0.664777	0.672843	0.734451	0.733598	0.735106	0.74009	0.732651	0.738301	0.739786	0.753429
1579.7	0.650709	0.672438	0.66399	0.675597	0.733513	0.737048	0.738727	0.744416	0.737579	0.743211	0.746016	0.759043
1581.63	0.651151	0.672174	0.663405	0.676338	0.731864	0.737253	0.739589	0.745684	0.738456	0.744402	0.748232	0.760978
1583.56	0.650182	0.670968	0.662571	0.675833	0.729252	0.735668	0.738364	0.744482	0.737115	0.74344	0.747784	0.760529
1585.49	0.65085	0.671832	0.663612	0.67717	0.728961	0.736471	0.739271	0.745602	0.737922	0.744932	0.749345	0.76218
1587.42	0.652027	0.673786	0.665626	0.679344	0.73057	0.738365	0.74107	0.747821	0.739971	0.746877	0.751607	0.764855
1589.34	0.654553	0.676897	0.669236	0.682404	0.734391	0.741708	0.744119	0.751081	0.743037	0.749664	0.754685	0.768684
1591.27	0.657904	0.679858	0.672719	0.685336	0.737821	0.744599	0.74687	0.753927	0.745649	0.752077	0.757495	0.771349
1593.2	0.66289	0.684929	0.678115	0.690874	0.743884	0.749756	0.752794	0.759453	0.751326	0.757711	0.763298	0.777168
1595.13	0.666924	0.68929	0.682331	0.694605	0.747975	0.752805	0.756172	0.762496	0.754328	0.761112	0.765852	0.779695
1597.06	0.673269	0.695009	0.686835	0.699098	0.751932	0.757179	0.759861	0.766622	0.75843	0.764899	0.769583	0.783085
1598.99	0.68181	0.702767	0.693777	0.706465	0.759705	0.76527	0.767629	0.774194	0.765995	0.772128	0.776824	0.790848
1600.92	0.690543	0.711623	0.703246	0.715162	0.770251	0.774628	0.777006	0.782807	0.774993	0.780941	0.784807	0.799038
1602.85	0.697915	0.719172	0.711214	0.722027	0.778141	0.780468	0.782578	0.788081	0.781261	0.786254	0.789406	0.803438
1604.77	0.70888	0.729209	0.720182	0.731348	0.787978	0.789445	0.790818	0.796524	0.790232	0.794493	0.797638	0.811261
1606.7	0.720914	0.741138	0.732213	0.743076	0.801378	0.801644	0.802369	0.807914	0.801807	0.805916	0.808498	0.822334
1608.63	0.73297	0.753225	0.744541	0.754366	0.813415	0.812008	0.811693	0.817153	0.811336	0.815111	0.816786	0.83047
1610.56	0.747238	0.766128	0.756061	0.765547	0.824252	0.822413	0.820862	0.826437	0.820636	0.824219	0.825393	0.838168
1612.49	0.76704	0.784609	0.773397	0.782554	0.844091	0.841286	0.838476	0.844102	0.838298	0.841165	0.841842	0.854274
1614.42	0.788923	0.807688	0.796959	0.806237	0.872819	0.866969	0.864319	0.868892	0.864926	0.866877	0.8668	0.879552
1616.35	0.799755	0.821254	0.814029	0.820391	0.888464	0.878322	0.877779	0.880714	0.875543	0.87581	0.874091	0.888458
1618.28	0.813596	0.831809	0.823635	0.827564	0.893331	0.883585	0.880612	0.884223	0.876064	0.876913	0.873161	0.886491
1620.21	0.84715	0.863045	0.852254	0.858138	0.927056	0.917558	0.913618	0.916359	0.90964	0.911369	0.907855	0.919892
1622.13	0.867751	0.886063	0.877869	0.882323	0.954215	0.94157	0.939618	0.940419	0.933477	0.934619	0.931782	0.944731
1624.06	0.876309	0.894711	0.887231	0.889161	0.956761	0.944553	0.941644	0.943348	0.933404	0.934217	0.930507	0.944488
1625.99	0.89718	0.914277	0.904265	0.907717	0.973998	0.96397	0.959967	0.962406	0.952235	0.953628	0.950622	0.962968
1627.92	0.905475	0.923101	0.912943	0.916364	0.980849	0.970866	0.967861	0.970704	0.958338	0.961804	0.958404	0.969653
1629.85	0.909693	0.925099	0.913981	0.918104	0.979854	0.972255	0.968204	0.972185	0.958402	0.961554	0.957518	0.969325
1631.78	0.924853	0.938956	0.92779	0.933009	0.998743	0.990993	0.986248	0.989367	0.97786	0.978931	0.975334	0.987173
1633.71	0.93597	0.953372	0.944853	0.948188	1.02067	1.00974	1.00746	1.00778	0.99805	0.997696	0.994689	1.0072
1635.64	0.912246	0.937256	0.934977	0.931367	1.0038	0.988188	0.990193	0.988971	0.975155	0.973861	0.970003	0.986473
1637.56	0.904226	0.924575	0.920074	0.91755	0.98378	0.970276	0.967901	0.969249	0.954939	0.953733	0.948435	0.963148
1639.49	0.924627	0.940238	0.931457	0.933342	0.997976	0.988368	0.984502	0.985954	0.97261	0.972652	0.967914	0.980607
1641.42	0.932338	0.946976	0.936886	0.940214	1.00385	0.994789	0.991281	0.992988	0.979008	0.979578	0.975749	0.987779
1643.35	0.943451	0.958001	0.948949	0.952346	1.01923	1.00822	1.00525	1.00606	0.993269	0.992543	0.990276	1.00225
1645.28	0.948278	0.968061	0.964028	0.963983	1.03733	1.02102	1.02188	1.0193	1.00885	1.00547	1.00408	1.01908
1647.21	0.915581	0.942275	0.942285	0.935454	1.00273	0.981847	0.982616	0.980417	0.971143	0.967641	0.96183	0.978723
1649.14	0.925417	0.946468	0.941325	0.938847	1.0018	0.985855	0.982395	0.983538	0.973415	0.972639	0.965802	0.979037
1651.07	0.957208	0.97819	0.97159	0.972362	1.03733	1.02329	1.02172	1.02062	1.01574	1.01509	1.00728	1.02115
1653	0.904692	0.937184	0.936699	0.930746	0.985899	0.969523	0.974228	0.968673	0.963138	0.962097	0.954596	0.971151
1654.92	0.879869	0.904872	0.901724	0.897223	0.945423	0.933136	0.930696	0.930176	0.921897	0.92208	0.918462	0.929351
1656.85	0.898827	0.917278	0.909809	0.910394	0.956816	0.949931	0.944975	0.946752	0.941242	0.943051	0.939529	0.949363
1658.78	0.893033	0.909698	0.900997	0.903805	0.949224	0.944451	0.939863	0.942016	0.938085	0.940958	0.937894	0.947701
1660.71	0.877607	0.89643	0.889275	0.892697	0.939382	0.933688	0.930429	0.93157	0.929547	0.932762	0.930859	0.941007
1662.64	0.839322	0.861304	0.856147	0.857503	0.901573	0.894162	0.892386	0.893415	0.892026	0.894737	0.892793	0.904449
1664.57	0.811178	0.830874	0.823737	0.827119	0.866579	0.862278	0.859216	0.86176	0.86124	0.864952	0.863353	0.873668
1666.5	0.805323	0.82553	0.818516	0.823681	0.865649	0.862617	0.859543	0.861947	0.863734	0.867259	0.866753	0.876288
1668.43	0.775028	0.800754	0.798758	0.800835	0.847193	0.839863	0.838577	0.839549	0.842409	0.844748	0.844515	0.856003
1670.35	0.72883	0.755707	0.755955	0.755934	0.798263	0.78859	0.787177	0.788717	0.790481	0.794262	0.792806	0.804413
1672.28	0.713648	0.737546	0.734341	0.737592	0.777738	0.770792	0.768569	0.771991	0.774603	0.779039	0.778088	0.788728
1674.21	0.698586	0.723135	0.719827	0.723958	0.7643	0.757459	0.757191	0.759675	0.762952	0.767505	0.767405	0.779136
1676.14	0.658323	0.681702	0.678876	0.681704	0.716626	0.711637	0.710562	0.713292	0.715563	0.720226	0.721266	0.732277
1678.07	0.649254	0.671141	0.667828	0.672082	0.707134	0.704096	0.701876	0.705047	0.708235	0.713234	0.715479	0.725844
1680	0.627076	0.650758	0.650418	0.652897	0.690705	0.685182	0.682805	0.685486	0.689475	0.694398	0.696418	0.707342
1681.93	0.608375	0.635355	0.636748	0.638596	0.679227	0.670249	0.668907	0.670291	0.677151	0.680685	0.682664	0.693819
1683.86	0.564997	0.597724	0.603741	0.601878	0.641067	0.627668	0.62934	0.628989	0.634894	0.638276	0.638969	0.652281
1685.79	0.525831	0.553599	0.556779	0.556183	0.586923	0.578514	0.576709	0.579942	0.582795	0.587605	0.588458	0.599576
1687.71	0.521241	0.545484	0.546516	0.549155	0.579078	0.573032	0.571132	0.574136	0.578463	0.58408	0.586292	0.595707
1689.64	0.495957	0.519363	0.519229	0.522617	0.548627	0.543896	0.54239	0.544689	0.549444	0.555064	0.557191	0.566393
1691.57	0.473302	0.495172	0.492603	0.498548	0.520057	0.518395	0.516095	0.519673	0.523408	0.529176	0.531754	0.541059
1693.5	0.459189	0.481783	0.479907	0.486734	0.510103	0.506868	0.504536	0.508018	0.513187	0.519239	0.522118	0.531348
1695.43	0.425817	0.453227	0.457281	0.459917	0.48777	0.478022	0.477156	0.479841	0.48331	0.489442	0.491949	0.502666
1697.36	0.389002	0.41795	0.424558	0.424746	0.45247	0.438526	0.43647	0.440136	0.443124	0.448833	0.450766	0.461664
1699.29	0.373393	0.401981	0.408325	0.409594	0.434803	0.420747	0.420053	0.422726	0.426852	0.432779	0.434793	0.445374
1701.22	0.332647	0.357784	0.363258	0.364091	0.381935	0.370259	0.36869	0.372455	0.372997	0.379841	0.381276	0.392657
1703.14	0.325244	0.348191	0.351269	0.354484	0.370771	0.360726	0.357702	0.36236	0.363555	0.370123	0.372344	0.383194
1705.07	0.310367	0.333924	0.337518	0.340705	0.355203	0.343102	0.340793	0.345197	0.346643	0.353169	0.355348	0.365942
1707	0.29662	0.31734	0.318906	0.323234	0.330767	0.320399	0.317245	0.322289	0.323667	0.330395	0.33247	0.342846
1708.93	0.291004	0.309428	0.309183	0.314741	0.317626	0.309905	0.306289	0.311064	0.313278	0.320089	0.322199	0.332641
1710.86	0.283677	0.301603	0.301163	0.306705	0.307226	0.299512	0.295411	0.300165	0.302987	0.30983	0.31166	0.322309
1712.79	0.276997	0.296368	0.29752	0.301868	0.303425	0.294028	0.289412	0.293871	0.297608	0.303915	0.305785	0.316445
1714.72	0.266057	0.289725	0.295808	0.29602	0.30261	0.288183	0.283541	0.287142	0.291721	0.297462	0.298539	0.309662
1716.65	0.254772	0.280632	0.289761	0.287819	0.296505	0.277386	0.273847	0.276762	0.28182	0.287979	0.287786	0.299782
1718.58	0.245145	0.266801	0.271927	0.272905	0.272889	0.258161	0.254217	0.257862	0.26265	0.269285	0.26938	0.280849
1720.5	0.244696	0.261528	0.261487	0.266231	0.259318	0.250775	0.245657	0.249993	0.25536	0.261883	0.26322	0.27329
1722.43	0.242923	0.258735	0.257866	0.263107	0.254324	0.246835	0.241676	0.245658	0.252449	0.258718	0.260313	0.269846
1724.36	0.238037	0.253292	0.252019	0.257466	0.246483	0.239517	0.234161	0.238231	0.24569	0.251927	0.253407	0.26282
1726.29	0.236443	0.250737	0.248096	0.254739	0.241314	0.235277	0.229564	0.233844	0.242357	0.248618	0.250523	0.259393
1728.22	0.234811	0.250221	0.249277	0.254211	0.242094	0.234	0.228213	0.231858	0.242363	0.248482	0.249967	0.258664
1730.15	0.232148	0.249904	0.252139	0.253883	0.244982	0.232948	0.226904	0.230247	0.242327	0.248453	0.24885	0.257943
1732.08	0.230245	0.250331	0.254183	0.254666	0.247786	0.232273	0.226471	0.229323	0.243758	0.249735	0.249787	0.258636
1734.01	0.222941	0.245172	0.25112	0.249585	0.243052	0.224973	0.220406	0.222309	0.237653	0.243956	0.243141	0.252344
1735.93	0.220699	0.238707	0.240345	0.241795	0.227405	0.215182	0.209141	0.212608	0.228455	0.234936	0.234634	0.243464
1737.86	0.218955	0.23594	0.236524	0.239458	0.223721	0.21243	0.206803	0.209773	0.227161	0.233571	0.23376	0.241674
1739.79	0.204302	0.222504	0.223979	0.226342	0.21083	0.199017	0.194221	0.19733	0.213006	0.219575	0.219413	0.227941
1741.72	0.192892	0.210453	0.21221	0.213926	0.199047	0.188283	0.183159	0.186619	0.2006	0.207348	0.207152	0.215732
1743.65	0.178461	0.196154	0.200333	0.199885	0.18891	0.176808	0.172006	0.174881	0.186688	0.193597	0.19333	0.201749
1745.58	0.163786	0.181634	0.186291	0.185863	0.177292	0.16473	0.160132	0.163483	0.172195	0.179161	0.179059	0.187973
1747.51	0.149133	0.168956	0.175624	0.173887	0.169164	0.154999	0.150787	0.154191	0.160344	0.167125	0.167051	0.176482
1749.44	0.135381	0.155796	0.164121	0.160794	0.158216	0.143732	0.139817	0.143095	0.146741	0.153382	0.153085	0.163017
1751.36	0.125613	0.143464	0.149783	0.148121	0.142675	0.131619	0.128092	0.131539	0.132744	0.139881	0.14008	0.149815
1753.29	0.118314	0.133363	0.13578	0.137698	0.128009	0.121734	0.117919	0.122412	0.121082	0.128375	0.129447	0.138879
1755.22	0.113086	0.12801	0.129897	0.132589	0.123047	0.117659	0.114074	0.118536	0.115913	0.123401	0.124584	0.133827
1757.15	0.105734	0.121581	0.125207	0.126261	0.119122	0.112555	0.109088	0.113364	0.109299	0.117024	0.1178	0.127657
1759.08	0.101637	0.116617	0.119342	0.121371	0.113645	0.107979	0.104429	0.109313	0.104046	0.111811	0.112768	0.12271
1761.01	0.096968	0.112801	0.116234	0.118064	0.111618	0.105046	0.102082	0.106556	0.100569	0.108595	0.109419	0.119144
1762.94	0.092709	0.108071	0.110805	0.112925	0.105266	0.099848	0.096793	0.101461	0.09456	0.102643	0.103478	0.113607
1764.87	0.091426	0.105312	0.106282	0.109729	0.100367	0.096811	0.09354	0.09871	0.09112	0.099081	0.100299	0.11007
1766.8	0.089134	0.103671	0.106277	0.108206	0.101384	0.09616	0.093103	0.097809	0.089941	0.097863	0.099017	0.108497
1768.72	0.085481	0.101351	0.105498	0.10611	0.101861	0.094638	0.091395	0.096164	0.087825	0.095685	0.096367	0.106358
1770.65	0.080627	0.099335	0.104737	0.105016	0.103497	0.093615	0.090908	0.095537	0.086824	0.094972	0.095057	0.105291
1772.58	0.076423	0.096498	0.102885	0.102211	0.101883	0.09049	0.088323	0.092707	0.083861	0.092027	0.091599	0.102271
1774.51	0.078031	0.094466	0.098344	0.098957	0.09505	0.087348	0.084493	0.08899	0.080204	0.088034	0.088218	0.098261
1776.44	0.078816	0.092946	0.095027	0.096847	0.090665	0.08551	0.082309	0.086832	0.077805	0.085634	0.08642	0.095879
1778.37	0.078176	0.091837	0.093879	0.09561	0.089825	0.084425	0.081491	0.085762	0.076647	0.084428	0.085278	0.094608
1780.3	0.076487	0.090645	0.093497	0.094414	0.089785	0.083381	0.080614	0.084352	0.075508	0.083062	0.083927	0.093325
1782.23	0.075698	0.08887	0.090705	0.092405	0.086287	0.081264	0.078099	0.082202	0.073156	0.080571	0.081555	0.091012
1784.15	0.075283	0.087884	0.089523	0.091213	0.084887	0.080244	0.077062	0.081124	0.071996	0.079449	0.080291	0.089577
1786.08	0.073999	0.086427	0.087562	0.08949	0.082435	0.078188	0.075066	0.079296	0.069906	0.077452	0.078338	0.087657
1788.01	0.07324	0.085404	0.086081	0.088435	0.081205	0.076961	0.073929	0.078346	0.068645	0.076317	0.077385	0.086429
1789.94	0.071357	0.085183	0.088544	0.088848	0.085781	0.07801	0.075223	0.079108	0.069602	0.077253	0.077914	0.086876
1791.87	0.067829	0.084273	0.090153	0.088561	0.088831	0.077537	0.075389	0.07872	0.069493	0.077192	0.077015	0.086551
1793.8	0.067601	0.082802	0.08732	0.086558	0.084565	0.075168	0.072647	0.076433	0.066921	0.074749	0.074567	0.084239
1795.73	0.068742	0.08231	0.08594	0.085618	0.082663	0.074619	0.071565	0.075492	0.06587	0.073598	0.073649	0.083143
1797.66	0.06789	0.081357	0.083836	0.084405	0.079979	0.073139	0.069889	0.074118	0.064415	0.071998	0.072356	0.081804
1799.59	0.066543	0.080711	0.083554	0.083882	0.079787	0.072573	0.069527	0.07354	0.063821	0.071508	0.071853	0.081134
1801.51	0.066889	0.080093	0.083599	0.083315	0.079886	0.071942	0.068999	0.072821	0.063076	0.070947	0.07125	0.080594
1803.44	0.066951	0.078838	0.079988	0.081619	0.075025	0.069716	0.066536	0.070831	0.060963	0.068563	0.069198	0.078606
1805.37	0.066162	0.078051	0.078038	0.080566	0.07258	0.068505	0.065295	0.069672	0.059788	0.067313	0.067878	0.077175
1807.3	0.065762	0.077812	0.078387	0.080357	0.073304	0.068501	0.065146	0.069595	0.059579	0.067291	0.067659	0.076865
1809.23	0.064476	0.077353	0.078703	0.080164	0.074197	0.068267	0.065098	0.069465	0.059368	0.06723	0.067343	0.076538
1811.16	0.063768	0.076987	0.078862	0.07983	0.074459	0.067933	0.064917	0.068931	0.058945	0.066889	0.066939	0.076225
1813.09	0.064241	0.076319	0.076643	0.078737	0.070995	0.066594	0.063305	0.067532	0.057405	0.065169	0.065691	0.075006
1815.02	0.064328	0.075849	0.074996	0.078103	0.068894	0.065651	0.062457	0.066813	0.056622	0.064254	0.064943	0.074107
1816.94	0.063869	0.075644	0.07536	0.07789	0.069312	0.065596	0.062378	0.066638	0.056504	0.064107	0.064662	0.0738
1818.87	0.063471	0.075121	0.074487	0.077317	0.068375	0.064858	0.061691	0.06611	0.055614	0.063445	0.064067	0.073221
1820.8	0.063226	0.074713	0.074028	0.07697	0.068182	0.064532	0.061321	0.065866	0.055154	0.063139	0.063677	0.072967
1822.73	0.062619	0.074803	0.075461	0.077453	0.070317	0.065407	0.062161	0.06641	0.055944	0.063683	0.064025	0.073231
1824.66	0.061354	0.074727	0.076891	0.077814	0.072521	0.065599	0.062752	0.066727	0.056255	0.064148	0.064239	0.073467
1826.59	0.061146	0.074291	0.075854	0.077274	0.071345	0.064827	0.061569	0.066293	0.055379	0.063416	0.063497	0.073097
1828.52	0.05933	0.074287	0.077054	0.077554	0.073162	0.065498	0.062507	0.066643	0.056176	0.063927	0.063816	0.073263
1830.45	0.058798	0.073976	0.077273	0.077187	0.072887	0.064835	0.062221	0.065991	0.055689	0.063363	0.063379	0.072974
1832.38	0.061324	0.073483	0.074063	0.075954	0.068244	0.06325	0.060221	0.064587	0.053943	0.061592	0.062157	0.071573
1834.3	0.061726	0.0732	0.073068	0.07562	0.067142	0.062959	0.059941	0.064227	0.053584	0.061212	0.061877	0.071136
1836.23	0.061224	0.07302	0.073435	0.075596	0.067727	0.063131	0.060019	0.064238	0.053543	0.061144	0.061817	0.071134
1838.16	0.061021	0.072839	0.073092	0.075367	0.067068	0.062746	0.059616	0.063837	0.053135	0.060818	0.061468	0.070709
1840.09	0.061215	0.072656	0.072524	0.075243	0.066583	0.062404	0.059201	0.063652	0.052726	0.060572	0.0612	0.070613
1842.02	0.060492	0.073235	0.075014	0.076173	0.070373	0.063806	0.06081	0.064943	0.053997	0.061887	0.06228	0.071575
1843.95	0.058736	0.07348	0.077628	0.076928	0.073896	0.064734	0.062046	0.065763	0.054928	0.063078	0.063043	0.072543
1845.88	0.059285	0.07314	0.076312	0.076105	0.071403	0.063929	0.060679	0.064647	0.053804	0.061843	0.06198	0.071739
1847.81	0.060016	0.072835	0.074474	0.075246	0.06845	0.062949	0.059568	0.063648	0.052861	0.060612	0.061122	0.070511
1849.73	0.060201	0.072018	0.071889	0.074406	0.065222	0.061353	0.05804	0.062607	0.051549	0.059359	0.059976	0.069457
1851.66	0.060229	0.071562	0.070392	0.073926	0.063523	0.060525	0.05727	0.062004	0.050668	0.05868	0.059259	0.068828
1853.59	0.060088	0.071564	0.07021	0.073825	0.063255	0.060377	0.057199	0.061886	0.050365	0.058533	0.059174	0.068672
1855.52	0.060016	0.0714	0.070051	0.073825	0.063134	0.060289	0.057114	0.06186	0.050281	0.058407	0.059173	0.068598
1857.45	0.059934	0.071458	0.070691	0.074009	0.063879	0.060668	0.057419	0.062097	0.050652	0.058646	0.059444	0.068751
1859.38	0.059895	0.071597	0.071155	0.074079	0.064438	0.060878	0.057578	0.062141	0.05087	0.058795	0.059487	0.068813
1861.31	0.059837	0.071529	0.070965	0.074019	0.064256	0.060734	0.057428	0.061896	0.050711	0.058685	0.059273	0.068664
1863.24	0.059603	0.071405	0.070585	0.073903	0.063985	0.06058	0.057247	0.061783	0.050495	0.058478	0.059167	0.068543
1865.17	0.058882	0.071772	0.071932	0.074426	0.066163	0.061473	0.057951	0.062596	0.05128	0.059223	0.059713	0.069185
1867.09	0.057237	0.072465	0.075619	0.075656	0.071605	0.063296	0.060003	0.064308	0.053072	0.061191	0.060888	0.070431
1869.02	0.057121	0.072477	0.076684	0.07595	0.072857	0.063456	0.060424	0.064501	0.053338	0.061551	0.061208	0.070893
1870.95	0.058953	0.07186	0.072965	0.074663	0.067035	0.061542	0.058221	0.062702	0.051371	0.059584	0.059882	0.069741
1872.88	0.059854	0.071514	0.070466	0.073861	0.063497	0.060282	0.057086	0.061806	0.05029	0.058518	0.059178	0.068841
1874.81	0.060103	0.071452	0.070041	0.073801	0.06279	0.060001	0.056857	0.061743	0.050024	0.0583	0.059134	0.068637
1876.74	0.06023	0.071501	0.070219	0.073882	0.063005	0.060136	0.057038	0.061773	0.050057	0.05831	0.059265	0.068682
1878.67	0.06041	0.071614	0.070577	0.074	0.063359	0.060444	0.057372	0.061856	0.050354	0.058501	0.059394	0.068882
1880.6	0.060401	0.071604	0.070405	0.0741	0.063193	0.060408	0.057248	0.061951	0.050318	0.058514	0.059354	0.068936
1882.52	0.060134	0.071571	0.070396	0.074171	0.063433	0.06036	0.057212	0.062033	0.050367	0.058526	0.059443	0.068892
1884.45	0.059937	0.071682	0.071042	0.074301	0.064269	0.060709	0.057671	0.062258	0.050626	0.058805	0.059567	0.069141
1886.38	0.06009	0.071745	0.071063	0.074368	0.064305	0.06077	0.057618	0.062412	0.050617	0.058813	0.059617	0.069257
1888.31	0.059457	0.072156	0.07254	0.074847	0.066075	0.061504	0.05838	0.062918	0.051452	0.059503	0.060189	0.069673
1890.24	0.059017	0.072185	0.07293	0.074703	0.066334	0.061437	0.058295	0.062785	0.051333	0.05934	0.059983	0.069797
1892.17	0.059881	0.071968	0.071369	0.074363	0.064456	0.060818	0.057479	0.062393	0.050562	0.058772	0.059541	0.06944
1894.1	0.059731	0.0721	0.072	0.074726	0.06558	0.061177	0.058129	0.062751	0.050914	0.059273	0.059924	0.069633
1896.03	0.059632	0.071998	0.07176	0.074636	0.065156	0.060957	0.057937	0.062554	0.050548	0.05905	0.059724	0.069382
1897.95	0.059912	0.071742	0.070401	0.074195	0.063126	0.060315	0.057067	0.061956	0.049919	0.058332	0.059188	0.06874
1899.88	0.059859	0.071667	0.070161	0.0741	0.062777	0.060171	0.056849	0.061867	0.049812	0.058182	0.059058	0.068715
1901.81	0.059734	0.071666	0.070235	0.074084	0.062979	0.060231	0.056962	0.06194	0.04974	0.058151	0.059027	0.068875
1903.74	0.059473	0.071587	0.070167	0.074079	0.063072	0.060098	0.056973	0.061925	0.049691	0.058115	0.058993	0.068761
1905.67	0.059444	0.071613	0.070358	0.074254	0.063475	0.060298	0.056994	0.062063	0.049793	0.05836	0.059076	0.068846
1907.6	0.059257	0.071933	0.071578	0.074732	0.065267	0.061048	0.0577	0.06265	0.050393	0.058993	0.059598	0.069422
1909.53	0.058995	0.071884	0.072059	0.074821	0.065975	0.061176	0.057814	0.062759	0.050456	0.059122	0.059567	0.069462
1911.46	0.059286	0.071616	0.070664	0.074369	0.063875	0.060374	0.056979	0.062026	0.049706	0.058409	0.058873	0.068877
1913.39	0.059485	0.071543	0.069948	0.074171	0.062937	0.060012	0.056734	0.061725	0.049447	0.058156	0.058678	0.068787
1915.31	0.059141	0.071679	0.070571	0.074342	0.063979	0.06057	0.057234	0.06221	0.04989	0.058455	0.059066	0.068942
1917.24	0.058148	0.072003	0.072493	0.074848	0.066505	0.061492	0.058407	0.062915	0.050842	0.059306	0.059851	0.069572
1919.17	0.058572	0.07186	0.072229	0.074771	0.066081	0.061237	0.057941	0.062791	0.050561	0.059127	0.059586	0.06976
1921.1	0.059265	0.072159	0.072705	0.075097	0.06676	0.061744	0.058458	0.063075	0.050937	0.059454	0.05987	0.069888
1923.03	0.058919	0.072466	0.073931	0.075372	0.068116	0.062152	0.059186	0.063305	0.051421	0.059915	0.060259	0.070285
1924.96	0.059516	0.071913	0.071311	0.074481	0.064478	0.060724	0.057583	0.062341	0.049976	0.058625	0.05933	0.069605
1926.89	0.060094	0.071766	0.070155	0.074184	0.062972	0.060332	0.057101	0.062078	0.0496	0.058209	0.059139	0.069249
1928.82	0.060148	0.071808	0.070155	0.074193	0.062847	0.060388	0.057091	0.062166	0.049717	0.05823	0.059299	0.069115
1930.74	0.060257	0.071885	0.070165	0.074336	0.062922	0.060503	0.057308	0.062257	0.049705	0.058371	0.059329	0.069159
1932.67	0.060272	0.072046	0.070597	0.074503	0.063432	0.060712	0.057619	0.062464	0.049914	0.058614	0.059423	0.069428
1934.6	0.060263	0.072085	0.070637	0.074494	0.063226	0.060549	0.057491	0.062494	0.049944	0.058588	0.059549	0.06961
1936.53	0.060329	0.072162	0.070669	0.074661	0.063218	0.060547	0.057501	0.062539	0.04991	0.058576	0.059606	0.069801
1938.46	0.060419	0.07231	0.070933	0.074866	0.063601	0.060788	0.057625	0.062898	0.050152	0.058667	0.059686	0.069937
1940.39	0.06022	0.072706	0.072417	0.075493	0.065745	0.061816	0.05861	0.063725	0.051129	0.05952	0.060467	0.070537
1942.32	0.059699	0.073123	0.074196	0.076071	0.068195	0.062843	0.059636	0.064276	0.051938	0.060475	0.061166	0.07144
1944.25	0.059765	0.072913	0.073087	0.075663	0.066722	0.062062	0.058828	0.063767	0.051277	0.059906	0.060536	0.071016
1946.18	0.060027	0.072784	0.071985	0.075456	0.065197	0.061538	0.058256	0.063445	0.050862	0.059389	0.060218	0.070611
1948.1	0.060337	0.072648	0.07131	0.075209	0.064048	0.061194	0.05784	0.063178	0.050605	0.059146	0.059954	0.070362
1950.03	0.060469	0.072597	0.070888	0.075061	0.063493	0.061063	0.057664	0.063051	0.050428	0.059141	0.059927	0.070102
1951.96	0.060303	0.072727	0.070945	0.075156	0.063638	0.061225	0.057736	0.063107	0.050506	0.059243	0.060095	0.070307
1953.89	0.060306	0.072813	0.071224	0.075346	0.064135	0.061451	0.058045	0.063264	0.050728	0.059527	0.060288	0.070544
1955.82	0.060328	0.072813	0.071266	0.075372	0.064256	0.061562	0.058117	0.063342	0.050662	0.05965	0.06042	0.070657
1957.75	0.060344	0.072819	0.070864	0.075162	0.06374	0.061303	0.057835	0.063238	0.050443	0.059399	0.06022	0.070555
1959.68	0.0603	0.072776	0.070821	0.07523	0.063896	0.061289	0.05788	0.063263	0.050459	0.059418	0.060278	0.07071
1961.61	0.060378	0.072656	0.070928	0.075342	0.064115	0.061419	0.058156	0.063311	0.050532	0.059528	0.060337	0.070896
1963.53	0.060513	0.072704	0.071103	0.075448	0.064276	0.061584	0.058305	0.063484	0.050673	0.059591	0.060356	0.070738
1965.46	0.060473	0.073103	0.072539	0.07601	0.066298	0.062382	0.059129	0.06424	0.051437	0.060375	0.061088	0.071222
1967.39	0.060406	0.073217	0.073182	0.0761	0.067097	0.062553	0.059392	0.064417	0.051666	0.060799	0.061388	0.071732
1969.32	0.060684	0.072889	0.071469	0.075555	0.064805	0.061679	0.058553	0.063746	0.050906	0.060082	0.06082	0.07123
1971.25	0.060884	0.072813	0.070797	0.075403	0.063989	0.061441	0.058279	0.063587	0.050819	0.059719	0.060626	0.070974
1973.18	0.060856	0.072823	0.070846	0.075451	0.063973	0.061578	0.058299	0.063671	0.050923	0.059659	0.06067	0.071123
1975.11	0.060878	0.072823	0.070861	0.075523	0.063977	0.061619	0.058425	0.063727	0.050888	0.059719	0.060711	0.071147
1977.04	0.060873	0.072894	0.070975	0.075495	0.064108	0.061621	0.058449	0.063785	0.05095	0.0597	0.06075	0.071163
1978.97	0.060829	0.07295	0.071059	0.075488	0.064138	0.061631	0.05858	0.063879	0.050969	0.059638	0.060816	0.071311
1980.89	0.060924	0.072931	0.071068	0.075565	0.064203	0.061653	0.058614	0.064019	0.050936	0.059748	0.060926	0.071438
1982.82	0.060908	0.072976	0.071168	0.075553	0.064295	0.061774	0.058566	0.064051	0.050999	0.059917	0.060953	0.071426
1984.75	0.060889	0.073151	0.071277	0.07559	0.064398	0.061928	0.058638	0.064126	0.051116	0.059934	0.060876	0.071506
1986.68	0.06092	0.073365	0.072032	0.075927	0.065491	0.06241	0.059131	0.064562	0.051481	0.060338	0.061156	0.07185
1988.61	0.060847	0.073479	0.072671	0.076224	0.066295	0.062765	0.059389	0.064864	0.051777	0.060763	0.061481	0.072085
1990.54	0.060467	0.073769	0.073497	0.076481	0.067237	0.063263	0.059858	0.065124	0.052203	0.06108	0.061798	0.072371
1992.47	0.060212	0.073878	0.073967	0.076584	0.067791	0.063469	0.060074	0.065132	0.052246	0.06122	0.061966	0.072667
1994.4	0.06041	0.073414	0.071971	0.076023	0.06535	0.062379	0.058965	0.064386	0.051289	0.060396	0.061193	0.072053
1996.32	0.060515	0.073191	0.070974	0.075739	0.064364	0.06193	0.058656	0.064188	0.050955	0.060027	0.060919	0.07176
1998.25	0.060528	0.07311	0.071097	0.07569	0.06447	0.061994	0.058675	0.064224	0.05095	0.059955	0.061019	0.071879
2000.18	0.060472	0.07307	0.071061	0.075642	0.064202	0.061949	0.058644	0.064193	0.050918	0.059904	0.060923	0.071852
2002.11	0.06042	0.073111	0.07096	0.075728	0.064172	0.061998	0.058669	0.064225	0.050894	0.060026	0.060939	0.071817
2004.04	0.060393	0.073198	0.07095	0.075786	0.064228	0.062101	0.058628	0.064358	0.05086	0.060054	0.060981	0.071864
2005.97	0.060472	0.073294	0.071144	0.075876	0.064461	0.062159	0.058711	0.064526	0.051067	0.060103	0.061098	0.071871
2007.9	0.060606	0.073361	0.071302	0.075987	0.064712	0.062314	0.058818	0.064592	0.051313	0.060267	0.061189	0.071862
2009.83	0.060704	0.073387	0.071272	0.076025	0.0647	0.062389	0.058851	0.064588	0.051281	0.060401	0.061227	0.071936
2011.76	0.060883	0.073551	0.071387	0.076145	0.064707	0.06243	0.059009	0.064662	0.051252	0.060492	0.061416	0.072169
2013.68	0.061004	0.073735	0.071737	0.076347	0.065107	0.062656	0.059281	0.064951	0.051482	0.060606	0.061597	0.072434
2015.61	0.061099	0.074146	0.072914	0.076753	0.066743	0.063476	0.060066	0.065534	0.052233	0.061218	0.062055	0.072975
2017.54	0.061219	0.074429	0.073755	0.077034	0.067735	0.06402	0.060636	0.065936	0.052754	0.06172	0.06251	0.073527
2019.47	0.061457	0.074208	0.072805	0.07679	0.066424	0.063482	0.060056	0.065587	0.05237	0.061378	0.062315	0.073271
2021.4	0.061575	0.074117	0.0722	0.07664	0.065759	0.063214	0.059882	0.065396	0.052149	0.0612	0.06229	0.073176
2023.33	0.06159	0.074163	0.072289	0.076725	0.065786	0.06328	0.060126	0.065531	0.052298	0.061254	0.062519	0.073393
2025.26	0.06169	0.07425	0.072297	0.076761	0.065698	0.063222	0.060106	0.065566	0.052306	0.061214	0.062472	0.073447
2027.19	0.061791	0.074389	0.072324	0.076863	0.065766	0.063297	0.060201	0.065658	0.052338	0.061251	0.0625	0.073547
2029.11	0.061814	0.074403	0.072309	0.076902	0.065753	0.063369	0.060178	0.065773	0.052367	0.061382	0.062604	0.073512
2031.04	0.061853	0.074537	0.072387	0.076942	0.065766	0.063362	0.0602	0.065817	0.052478	0.061606	0.062611	0.073516
2032.97	0.061912	0.074615	0.072472	0.077057	0.065816	0.06339	0.06032	0.065942	0.052449	0.061714	0.062657	0.073606
2034.9	0.061905	0.074671	0.072544	0.077166	0.065996	0.063533	0.060343	0.065991	0.052501	0.061681	0.062745	0.073696
2036.83	0.06187	0.074717	0.072557	0.077165	0.066105	0.063609	0.060307	0.065993	0.052644	0.061633	0.062849	0.073873
2038.76	0.061862	0.07474	0.072817	0.077283	0.066411	0.063895	0.060496	0.066204	0.052689	0.061944	0.062954	0.07396
2040.69	0.061806	0.074948	0.073528	0.077705	0.06738	0.064338	0.060924	0.066446	0.053039	0.062399	0.063064	0.074151
2042.62	0.061639	0.074843	0.073242	0.077633	0.067067	0.064043	0.060649	0.066393	0.052879	0.062176	0.062904	0.074166
2044.54	0.061588	0.074678	0.072614	0.077341	0.066242	0.063768	0.060304	0.066221	0.052558	0.061856	0.062662	0.073839
2046.47	0.061612	0.074679	0.072542	0.077276	0.066101	0.063783	0.06028	0.066142	0.05256	0.061867	0.062644	0.07374
2048.4	0.061697	0.074638	0.07233	0.077187	0.065973	0.063668	0.060201	0.066054	0.052463	0.061898	0.062664	0.073773
2050.33	0.061738	0.074667	0.072187	0.07714	0.066008	0.063766	0.060219	0.066073	0.05245	0.061954	0.062664	0.073781
2052.26	0.061681	0.074664	0.072126	0.077159	0.066058	0.063796	0.060252	0.066218	0.052396	0.061981	0.062676	0.073841
2054.19	0.061663	0.074697	0.072121	0.077343	0.066063	0.063758	0.060371	0.066269	0.052337	0.061988	0.062724	0.073918
2056.12	0.061665	0.074768	0.072175	0.077361	0.066076	0.063809	0.060425	0.066304	0.052359	0.061956	0.062772	0.073919
2058.05	0.061712	0.074713	0.072244	0.077289	0.066276	0.063931	0.060499	0.066319	0.052456	0.061959	0.062848	0.073934
2059.98	0.061734	0.074717	0.072395	0.07731	0.066385	0.064046	0.060596	0.066343	0.052587	0.062059	0.062838	0.074038
2061.9	0.061805	0.07477	0.072514	0.077401	0.066632	0.064124	0.060682	0.066523	0.052703	0.062227	0.062926	0.074119
2063.83	0.061764	0.074944	0.073277	0.077683	0.067683	0.064576	0.061166	0.066861	0.053056	0.062504	0.063298	0.074425
2065.76	0.061809	0.074972	0.073443	0.077637	0.067834	0.064592	0.061219	0.066894	0.053119	0.062467	0.063369	0.074519
2067.69	0.061914	0.07469	0.072541	0.077347	0.066776	0.064129	0.060805	0.066569	0.052831	0.062108	0.062995	0.074144
2069.62	0.061849	0.074483	0.072266	0.077323	0.066505	0.064009	0.060726	0.066483	0.0527	0.06197	0.06293	0.074121
2071.55	0.061847	0.074557	0.072405	0.077293	0.066636	0.063944	0.060691	0.066437	0.052618	0.061938	0.062984	0.07424
2073.48	0.061832	0.07473	0.072525	0.077256	0.066604	0.063938	0.060813	0.066444	0.052623	0.06199	0.06298	0.074144
2075.41	0.061785	0.074686	0.072469	0.07722	0.06647	0.063941	0.060813	0.066439	0.052559	0.061984	0.062975	0.074078
2077.33	0.06187	0.074667	0.072447	0.077269	0.066439	0.063995	0.060758	0.066493	0.05252	0.061897	0.062947	0.074145
2079.26	0.061784	0.074613	0.072436	0.07728	0.066454	0.063958	0.06062	0.066486	0.052497	0.061855	0.062878	0.07408
2081.19	0.061643	0.074569	0.072337	0.077184	0.066496	0.063947	0.060566	0.066424	0.052476	0.061883	0.06279	0.073974
2083.12	0.061583	0.074604	0.072239	0.077192	0.066395	0.063949	0.060499	0.066346	0.052524	0.06183	0.062678	0.073944
2085.05	0.061517	0.074605	0.072313	0.077205	0.066441	0.063867	0.060403	0.066245	0.052479	0.061745	0.062668	0.07402
2086.98	0.061399	0.074543	0.072301	0.077192	0.066628	0.063965	0.060496	0.066325	0.052349	0.061857	0.062684	0.074049
2088.91	0.061342	0.074547	0.072421	0.07722	0.066832	0.064235	0.060633	0.066405	0.052469	0.062023	0.062664	0.074088
2090.84	0.061242	0.074403	0.072241	0.077064	0.066673	0.064111	0.0605	0.066261	0.052351	0.061791	0.062525	0.073982
2092.77	0.061092	0.074216	0.071724	0.076892	0.066108	0.063763	0.060163	0.066129	0.051966	0.061481	0.062293	0.073735
2094.69	0.061047	0.074275	0.071711	0.076865	0.065912	0.06368	0.060094	0.066077	0.051869	0.061487	0.062384	0.073609
2096.62	0.060932	0.074276	0.071704	0.076755	0.065952	0.063633	0.060047	0.065924	0.05187	0.061416	0.062418	0.07353
2098.55	0.060826	0.074193	0.071612	0.076698	0.066016	0.063599	0.059932	0.065943	0.051802	0.061397	0.062377	0.073468
2100.48	0.060771	0.074035	0.071416	0.076634	0.065935	0.063524	0.059845	0.065949	0.051749	0.061404	0.062354	0.073407
2102.41	0.060762	0.073967	0.071285	0.076589	0.065822	0.06352	0.059803	0.065877	0.051677	0.061299	0.062257	0.073416
2104.34	0.06072	0.073917	0.071267	0.076633	0.065684	0.063452	0.059714	0.065792	0.051607	0.061274	0.062212	0.073384
2106.27	0.060632	0.073874	0.071278	0.076567	0.065761	0.06332	0.059798	0.06579	0.051536	0.061228	0.062313	0.073375
2108.2	0.060516	0.073875	0.071235	0.076451	0.065857	0.063267	0.059792	0.065741	0.051491	0.061142	0.062278	0.073357
2110.12	0.0605	0.073872	0.071255	0.076368	0.065784	0.063286	0.059702	0.065674	0.051528	0.061148	0.062189	0.073372
2112.05	0.060626	0.07389	0.07139	0.076288	0.065861	0.063383	0.059815	0.065808	0.051423	0.061182	0.062267	0.073409
2113.98	0.060724	0.07385	0.071543	0.076334	0.066158	0.063474	0.059958	0.065847	0.051474	0.061225	0.062283	0.07344
2115.91	0.060702	0.073723	0.071494	0.076293	0.066069	0.063349	0.059834	0.06575	0.051521	0.061104	0.062238	0.073399
2117.84	0.06059	0.073636	0.071337	0.076183	0.065685	0.063126	0.059583	0.065521	0.051347	0.060866	0.062089	0.073344
2119.77	0.060628	0.073639	0.071358	0.076178	0.065602	0.063133	0.059542	0.0654	0.051284	0.060744	0.062038	0.073359
2121.7	0.060568	0.07354	0.071233	0.076148	0.065586	0.063062	0.059409	0.065368	0.05109	0.0607	0.062054	0.073263
2123.63	0.060478	0.073522	0.071222	0.076202	0.065544	0.062969	0.059305	0.065256	0.050909	0.060663	0.061933	0.073128
2125.56	0.060365	0.073503	0.071204	0.076167	0.065378	0.062883	0.059295	0.065136	0.050886	0.060536	0.061812	0.072994
2127.48	0.060224	0.073445	0.071124	0.076057	0.065271	0.062765	0.0592	0.065203	0.050943	0.060543	0.061768	0.072989
2129.41	0.060214	0.073327	0.070961	0.075955	0.065115	0.062624	0.059062	0.065135	0.050868	0.060604	0.061674	0.072907
2131.34	0.060067	0.073304	0.070868	0.075907	0.065001	0.062559	0.059066	0.064894	0.050694	0.060445	0.061505	0.072786
2133.27	0.059854	0.073248	0.07073	0.075822	0.064949	0.062544	0.058956	0.064755	0.050591	0.060234	0.06132	0.07264
2135.2	0.059736	0.073139	0.070758	0.075816	0.065169	0.062613	0.05878	0.064785	0.050487	0.060182	0.061317	0.072543
2137.13	0.059627	0.073088	0.070738	0.075862	0.065127	0.062456	0.0586	0.064704	0.050302	0.060059	0.061227	0.072382
2139.06	0.059595	0.073085	0.070569	0.07584	0.064786	0.062238	0.058485	0.064512	0.05026	0.05988	0.061033	0.07229
2140.99	0.059457	0.073072	0.070402	0.075784	0.064568	0.062215	0.058367	0.064484	0.050127	0.059796	0.060906	0.072327
2142.91	0.059418	0.072936	0.070186	0.075744	0.064395	0.062186	0.058191	0.064428	0.049926	0.059798	0.060959	0.07226
2144.84	0.0594	0.072848	0.070172	0.075772	0.064421	0.06214	0.058137	0.064383	0.0499	0.059815	0.06103	0.07218
2146.77	0.059312	0.072851	0.070229	0.075708	0.064433	0.062074	0.058109	0.064369	0.049907	0.059723	0.060926	0.072142
2148.7	0.059209	0.072859	0.07024	0.075627	0.064361	0.061938	0.058012	0.064261	0.049783	0.059648	0.060898	0.072087
2150.63	0.059186	0.072879	0.070189	0.075647	0.064319	0.061787	0.057872	0.064212	0.04971	0.059684	0.060922	0.07206
2152.56	0.059205	0.072762	0.070075	0.075568	0.06426	0.06176	0.057806	0.064285	0.049856	0.059654	0.06086	0.072072
2154.49	0.059183	0.072658	0.070014	0.075461	0.064139	0.061815	0.057791	0.06428	0.04981	0.059628	0.060717	0.07201
2156.42	0.059241	0.072714	0.070126	0.075545	0.064124	0.061813	0.057891	0.064155	0.04972	0.059558	0.060671	0.07199
2158.35	0.059208	0.072649	0.070153	0.075672	0.064205	0.061814	0.057992	0.064199	0.04972	0.059537	0.060563	0.071983
2160.27	0.059244	0.072713	0.07023	0.075587	0.064194	0.061833	0.058071	0.064246	0.049689	0.059545	0.060434	0.071999
2162.2	0.059276	0.072748	0.070334	0.075462	0.064177	0.061814	0.05813	0.064191	0.049649	0.05942	0.06038	0.07207
2164.13	0.059208	0.07263	0.070286	0.075342	0.064178	0.061722	0.058055	0.064042	0.049521	0.059353	0.060262	0.072039
2166.06	0.059213	0.07257	0.070215	0.075278	0.064104	0.061584	0.058059	0.063898	0.049362	0.059252	0.060177	0.071979
2167.99	0.059052	0.072471	0.070121	0.075233	0.064011	0.061577	0.057975	0.063934	0.049419	0.059152	0.060009	0.07197
2169.92	0.058881	0.072463	0.070046	0.075164	0.063955	0.061513	0.057888	0.063913	0.049408	0.059153	0.059906	0.071922
2171.85	0.058938	0.072506	0.070119	0.075098	0.063913	0.061383	0.057911	0.063792	0.049218	0.059038	0.059939	0.071797
2173.78	0.058959	0.072398	0.07009	0.074944	0.063817	0.061328	0.057833	0.063736	0.049126	0.058857	0.059884	0.071807
2175.7	0.058857	0.072221	0.069925	0.074943	0.063668	0.06123	0.05772	0.063766	0.049014	0.058752	0.059822	0.071785
2177.63	0.058654	0.072212	0.069863	0.075049	0.063662	0.061217	0.057692	0.063733	0.048908	0.058874	0.059741	0.071709
2179.56	0.058495	0.072243	0.069745	0.074923	0.063676	0.061215	0.057574	0.063735	0.048766	0.058841	0.059633	0.071586
2181.49	0.058365	0.072282	0.069739	0.07487	0.063611	0.061116	0.057455	0.063703	0.048578	0.058712	0.059611	0.071463
2183.42	0.0582	0.07215	0.069601	0.074822	0.063454	0.061035	0.057415	0.0636	0.048481	0.058645	0.059448	0.071448
2185.35	0.058167	0.071944	0.069373	0.074744	0.063239	0.060987	0.05735	0.063518	0.048424	0.058558	0.059325	0.071459
2187.28	0.057993	0.071951	0.06929	0.074753	0.06312	0.060985	0.057142	0.063357	0.048445	0.058563	0.05935	0.071537
2189.21	0.057842	0.072019	0.069251	0.07476	0.063069	0.061056	0.057047	0.06326	0.048427	0.05862	0.059308	0.071503
2191.13	0.057822	0.071963	0.069241	0.074788	0.062992	0.060987	0.057097	0.06319	0.048291	0.058592	0.059238	0.071437
2193.06	0.057757	0.071901	0.069211	0.074758	0.062967	0.06085	0.057045	0.06327	0.048265	0.058425	0.059138	0.071554
2194.99	0.057635	0.071917	0.069226	0.074731	0.062974	0.06073	0.057004	0.063382	0.048284	0.058323	0.05915	0.071732
2196.92	0.057594	0.071825	0.069127	0.074643	0.062957	0.060637	0.056965	0.06335	0.048271	0.058214	0.059211	0.07156
2198.85	0.05764	0.071759	0.068967	0.074584	0.062893	0.060702	0.056836	0.063256	0.048191	0.058331	0.059161	0.07136
2200.78	0.057695	0.071855	0.069008	0.074542	0.062892	0.060764	0.056839	0.063233	0.048111	0.058492	0.059246	0.071324
2202.71	0.05767	0.071819	0.0691	0.074567	0.062929	0.060768	0.057061	0.06329	0.048169	0.058396	0.059364	0.071381
2204.64	0.057687	0.071656	0.069064	0.074659	0.062951	0.060775	0.057153	0.063351	0.048206	0.058495	0.059396	0.071487
2206.57	0.057794	0.071657	0.069152	0.074664	0.062915	0.060783	0.057126	0.063432	0.048169	0.058566	0.059434	0.07145
2208.49	0.057877	0.071782	0.069305	0.074634	0.062982	0.060865	0.057226	0.063448	0.048241	0.058493	0.059411	0.071565
2210.42	0.057882	0.071846	0.069357	0.074612	0.063061	0.060913	0.057339	0.063426	0.048276	0.058397	0.059435	0.071675
2212.35	0.05783	0.0718	0.069345	0.07462	0.062975	0.060853	0.057363	0.0635	0.048222	0.058411	0.059494	0.071772
2214.28	0.057768	0.071767	0.069279	0.074693	0.062933	0.060827	0.057317	0.063441	0.048191	0.058481	0.059408	0.071758
2216.21	0.057721	0.071822	0.069279	0.074708	0.062931	0.060872	0.057344	0.063332	0.048083	0.058476	0.059466	0.071713
2218.14	0.057693	0.071854	0.069306	0.07466	0.062926	0.060908	0.057339	0.063402	0.048044	0.058438	0.059577	0.071844
2220.07	0.057701	0.071865	0.069328	0.074742	0.06289	0.060881	0.057238	0.063492	0.048059	0.05849	0.059594	0.071911
2222	0.057749	0.071869	0.069335	0.074797	0.062913	0.060949	0.05732	0.063603	0.048092	0.05861	0.059629	0.071922
2223.92	0.057691	0.071881	0.06938	0.074856	0.062894	0.061057	0.05738	0.063694	0.048106	0.058733	0.05973	0.072038
2225.85	0.057613	0.07196	0.069427	0.074936	0.062884	0.060984	0.057401	0.06373	0.048007	0.05875	0.059789	0.072124
2227.78	0.057606	0.071953	0.069406	0.074969	0.062985	0.060986	0.057465	0.063829	0.048012	0.058697	0.059855	0.072164
2229.71	0.057543	0.071952	0.069415	0.074975	0.062964	0.061076	0.057378	0.063889	0.048031	0.058726	0.059934	0.072293
2231.64	0.057552	0.07202	0.069319	0.074943	0.062829	0.061064	0.05733	0.063894	0.048054	0.058792	0.059967	0.072331
2233.57	0.057671	0.072016	0.069305	0.074939	0.062782	0.06111	0.057387	0.063866	0.048069	0.058858	0.059912	0.072353
2235.5	0.057628	0.072012	0.06941	0.075172	0.062846	0.06111	0.057378	0.063888	0.048043	0.058829	0.059908	0.072413
2237.43	0.057562	0.072134	0.069429	0.075426	0.062927	0.061121	0.057457	0.064003	0.048097	0.058862	0.059972	0.072486
2239.36	0.05763	0.072347	0.069506	0.075536	0.062977	0.061249	0.057634	0.064142	0.048255	0.059	0.060021	0.072717
2241.28	0.057664	0.072466	0.069561	0.075593	0.063008	0.06136	0.057701	0.064222	0.048375	0.059089	0.060147	0.072896
2243.21	0.057649	0.072559	0.069692	0.075663	0.063074	0.061461	0.05768	0.064235	0.048509	0.059184	0.060325	0.072932
2245.14	0.057718	0.072702	0.069761	0.075837	0.063184	0.061473	0.057651	0.06434	0.048523	0.059259	0.060449	0.072982
2247.07	0.057898	0.072726	0.069805	0.075913	0.063277	0.061564	0.057677	0.064427	0.048478	0.059388	0.060479	0.073126
2249	0.05799	0.072681	0.069858	0.075986	0.063228	0.061709	0.057845	0.064559	0.048539	0.059513	0.060535	0.073268
2250.93	0.058059	0.072874	0.069985	0.076197	0.063388	0.061825	0.058081	0.064777	0.048667	0.059665	0.060582	0.073358
2252.86	0.058211	0.073077	0.070268	0.076416	0.063604	0.06191	0.058304	0.064933	0.048835	0.059811	0.060729	0.073576
2254.79	0.058279	0.073138	0.070427	0.076604	0.063686	0.062003	0.058525	0.065123	0.04898	0.059828	0.060942	0.073769
2256.71	0.058346	0.073174	0.070565	0.076853	0.063761	0.062244	0.058676	0.06529	0.049069	0.059966	0.061123	0.073963
2258.64	0.058464	0.073325	0.070751	0.077078	0.063718	0.062353	0.058761	0.06539	0.04928	0.060265	0.061325	0.074098
2260.57	0.058561	0.07348	0.070781	0.077256	0.063799	0.062316	0.058818	0.065614	0.049414	0.060422	0.061494	0.074222
2262.5	0.058512	0.073643	0.07087	0.07741	0.063949	0.062417	0.058951	0.065772	0.049459	0.060466	0.061629	0.074499
2264.43	0.058555	0.073662	0.070865	0.077512	0.063956	0.062534	0.059025	0.065797	0.04944	0.060542	0.061733	0.074674
2266.36	0.05875	0.073697	0.070896	0.077671	0.063887	0.06277	0.059133	0.065895	0.049436	0.060623	0.061884	0.074812
2268.29	0.058782	0.073949	0.0711	0.077954	0.06388	0.062949	0.059276	0.065982	0.049566	0.060764	0.062066	0.074864
2270.22	0.058853	0.074117	0.071341	0.078179	0.064044	0.063111	0.059411	0.066085	0.049596	0.060931	0.062198	0.075057
2272.15	0.058985	0.074216	0.071584	0.078315	0.064244	0.063242	0.059537	0.066285	0.049677	0.061089	0.062265	0.075387
2274.07	0.059136	0.074425	0.071719	0.078553	0.064412	0.063323	0.05961	0.066493	0.049977	0.061113	0.062367	0.075557
2276	0.059223	0.074637	0.07187	0.078691	0.064616	0.063543	0.05976	0.066632	0.050168	0.061257	0.062497	0.075821
2277.93	0.059298	0.074775	0.072035	0.07878	0.064799	0.063687	0.059994	0.066863	0.050306	0.061535	0.062677	0.076026
2279.86	0.059431	0.074969	0.072243	0.078865	0.064958	0.063796	0.060133	0.067078	0.050493	0.061709	0.062878	0.076154
2281.79	0.059573	0.075063	0.072381	0.079073	0.065234	0.063968	0.060246	0.067283	0.050524	0.061932	0.063012	0.076405
2283.72	0.059712	0.075175	0.072507	0.079373	0.065492	0.064223	0.060469	0.067526	0.050703	0.062169	0.063126	0.076601
2285.65	0.059865	0.075498	0.072777	0.079804	0.065515	0.064451	0.060673	0.06764	0.050745	0.062404	0.063284	0.076761
2287.58	0.060146	0.075767	0.073055	0.0805	0.065555	0.064726	0.060747	0.067727	0.050764	0.062592	0.0635	0.077007
2289.5	0.060389	0.076058	0.073295	0.081145	0.06558	0.06509	0.060821	0.067905	0.050952	0.062894	0.063851	0.077289
2291.43	0.060466	0.07641	0.073796	0.081819	0.065631	0.065379	0.061044	0.068081	0.051241	0.063283	0.064182	0.07772
2293.36	0.060566	0.076661	0.074245	0.082597	0.065908	0.065612	0.061269	0.068221	0.051588	0.063756	0.064306	0.07831
2295.29	0.060771	0.076952	0.074527	0.083384	0.066185	0.065834	0.061442	0.068395	0.051776	0.064131	0.064441	0.078648
2297.22	0.061217	0.077293	0.074875	0.084282	0.066406	0.066093	0.06156	0.068633	0.051855	0.064395	0.064651	0.078928
2299.15	0.061664	0.077515	0.075269	0.085174	0.066515	0.066471	0.061591	0.068801	0.051953	0.06474	0.064959	0.079381
2301.08	0.061852	0.077737	0.075777	0.086048	0.066716	0.0668	0.061862	0.069029	0.052176	0.065115	0.06515	0.079823
2303.01	0.062187	0.078221	0.076269	0.087016	0.066909	0.067065	0.062092	0.069269	0.052311	0.065566	0.065299	0.080128
2304.94	0.062506	0.07872	0.076775	0.088377	0.066985	0.067562	0.062148	0.069367	0.052296	0.066004	0.065616	0.080565
2306.86	0.062558	0.079213	0.07735	0.090068	0.066895	0.068041	0.062151	0.069479	0.052285	0.066277	0.065894	0.081234
2308.79	0.062513	0.079742	0.077844	0.091612	0.066801	0.068311	0.062109	0.069643	0.052415	0.066748	0.066043	0.081986
2310.72	0.062486	0.080088	0.078012	0.092782	0.066516	0.068442	0.062002	0.069641	0.052418	0.067186	0.066109	0.08237
2312.65	0.062477	0.080052	0.077667	0.093668	0.065943	0.068549	0.061862	0.069554	0.052113	0.0674	0.066202	0.082543
2314.58	0.062404	0.079924	0.077313	0.094593	0.065365	0.068385	0.061871	0.069677	0.051926	0.067692	0.06616	0.082811
2316.51	0.062099	0.080251	0.077576	0.095886	0.064666	0.068241	0.061727	0.069749	0.051929	0.067986	0.066116	0.083184
2318.44	0.061482	0.080742	0.078043	0.097823	0.063978	0.068495	0.061351	0.069518	0.051651	0.068359	0.065818	0.083767
2320.37	0.060814	0.081199	0.078207	0.099947	0.062944	0.068613	0.060914	0.069246	0.051248	0.068762	0.065551	0.084459
2322.29	0.060228	0.081656	0.077926	0.101447	0.061725	0.068376	0.06029	0.069084	0.051192	0.069025	0.065489	0.08486
2324.22	0.0594	0.081756	0.077158	0.102241	0.060539	0.068156	0.059738	0.068964	0.051067	0.068909	0.065328	0.085041
2326.15	0.058794	0.081477	0.076181	0.103127	0.059419	0.068068	0.059357	0.068865	0.050458	0.068757	0.065327	0.085387
2328.08	0.058605	0.081128	0.075442	0.104584	0.058471	0.067789	0.059142	0.068842	0.04986	0.068989	0.065309	0.085614
2330.01	0.058151	0.081241	0.075333	0.105791	0.057462	0.067453	0.058836	0.068704	0.049489	0.069391	0.065201	0.085893
2331.94	0.057392	0.081548	0.075093	0.106107	0.056454	0.067222	0.058563	0.068505	0.049198	0.069519	0.065316	0.086166
2333.87	0.057046	0.081549	0.074267	0.106044	0.055801	0.066913	0.058505	0.068764	0.049018	0.069376	0.065467	0.086111
2335.8	0.056786	0.081724	0.073956	0.106557	0.055353	0.066857	0.058314	0.068935	0.04894	0.069514	0.065366	0.086058
2337.72	0.056586	0.081853	0.07402	0.10718	0.055104	0.067091	0.058173	0.06891	0.048878	0.069823	0.065459	0.086441
2339.65	0.056714	0.082133	0.074213	0.108178	0.0548	0.067325	0.058563	0.069102	0.049271	0.070021	0.06563	0.086992
2341.58	0.057135	0.082488	0.074848	0.109186	0.055092	0.067512	0.058975	0.069366	0.049634	0.070323	0.065899	0.087523
2343.51	0.05835	0.082657	0.075738	0.109298	0.056319	0.067977	0.059476	0.069711	0.050097	0.070989	0.066472	0.087954
2345.44	0.059348	0.082772	0.076951	0.107455	0.05823	0.068736	0.060536	0.070148	0.051102	0.071246	0.067304	0.088041
2347.37	0.061079	0.08327	0.078457	0.104252	0.061886	0.070053	0.062164	0.071485	0.052481	0.0712	0.068446	0.088058
2349.3	0.062092	0.084079	0.079267	0.104528	0.063521	0.071214	0.063035	0.072422	0.05326	0.071625	0.069078	0.088392
2351.23	0.060926	0.084221	0.078361	0.107948	0.061037	0.070861	0.062173	0.072121	0.052702	0.072036	0.068863	0.089011
2353.16	0.059332	0.08424	0.077369	0.111501	0.0577	0.069943	0.061133	0.071469	0.051782	0.07254	0.068134	0.089674
2355.08	0.058615	0.08431	0.076682	0.114823	0.055278	0.069545	0.060059	0.070731	0.050704	0.073381	0.067574	0.090417
2357.01	0.057935	0.084376	0.07591	0.116968	0.053488	0.069434	0.058906	0.070173	0.050287	0.073742	0.067377	0.091047
2358.94	0.057402	0.084715	0.076197	0.118494	0.052781	0.069207	0.058744	0.07025	0.050166	0.074088	0.067524	0.091429
2360.87	0.057074	0.085073	0.076544	0.118791	0.05293	0.069538	0.059141	0.07059	0.049985	0.073846	0.068011	0.091952
2362.8	0.057827	0.085475	0.077324	0.117866	0.05408	0.069726	0.060201	0.071169	0.050806	0.074103	0.068384	0.092413
2364.73	0.0591	0.085263	0.077358	0.116833	0.055102	0.069967	0.060711	0.071876	0.051337	0.074616	0.068933	0.092514
2366.66	0.059705	0.08613	0.078724	0.114578	0.057988	0.071525	0.061697	0.072687	0.052508	0.074325	0.069924	0.092627
2368.59	0.061508	0.086798	0.080842	0.11194	0.061528	0.072337	0.063618	0.073868	0.05417	0.074794	0.070824	0.092346
2370.51	0.063824	0.086514	0.081546	0.109678	0.064116	0.072642	0.065389	0.075108	0.055313	0.075224	0.071879	0.092103
2372.44	0.065746	0.086746	0.082124	0.107304	0.066561	0.073502	0.066795	0.076265	0.056293	0.075157	0.073149	0.092543
2374.37	0.067169	0.087336	0.083136	0.104894	0.069014	0.074784	0.068002	0.077324	0.05782	0.075432	0.074184	0.092723
2376.3	0.068279	0.087797	0.084386	0.102422	0.071482	0.075857	0.069393	0.078274	0.059255	0.076042	0.075033	0.092661
2378.23	0.069533	0.088076	0.085401	0.100042	0.073877	0.076477	0.07081	0.079243	0.060615	0.076229	0.075945	0.092645
2380.16	0.070262	0.088134	0.085862	0.097809	0.075724	0.076997	0.071924	0.080011	0.061902	0.076149	0.076647	0.092555
2382.09	0.070609	0.088252	0.085901	0.09571	0.076741	0.077509	0.072857	0.080791	0.062615	0.076077	0.077279	0.092421
2384.02	0.070898	0.088306	0.085581	0.094147	0.07737	0.077703	0.073626	0.081539	0.063082	0.076053	0.077847	0.092282
2385.95	0.071041	0.088208	0.085272	0.093268	0.077795	0.077746	0.074093	0.082075	0.063447	0.076212	0.078202	0.092354
2387.87	0.071207	0.088267	0.085196	0.092983	0.078099	0.077994	0.074435	0.082523	0.063877	0.076535	0.078608	0.092577
2389.8	0.071483	0.088527	0.0854	0.092982	0.078478	0.078403	0.07491	0.08294	0.064392	0.076857	0.078915	0.092839
2391.73	0.071829	0.088909	0.085748	0.093179	0.078915	0.078758	0.075536	0.083424	0.064782	0.077281	0.079375	0.093204
2393.66	0.072177	0.089408	0.086213	0.093466	0.079373	0.079204	0.076014	0.083882	0.065276	0.077564	0.079965	0.093753
2395.59	0.072597	0.089847	0.086748	0.093797	0.079743	0.079568	0.076395	0.084257	0.065807	0.077848	0.080345	0.094291
2397.52	0.073129	0.090184	0.087069	0.094251	0.080062	0.079941	0.076843	0.084717	0.066238	0.078309	0.080864	0.094765
2399.45	0.073614	0.090444	0.087352	0.094595	0.080367	0.080463	0.077248	0.085286	0.066659	0.078797	0.081345	0.095168
2401.38	0.073787	0.090697	0.087722	0.094949	0.080798	0.080862	0.077633	0.085725	0.067101	0.079357	0.081592	0.095664
2403.3	0.074011	0.091096	0.088169	0.0954	0.081335	0.081239	0.078154	0.086082	0.067445	0.079636	0.082099	0.096241
2405.23	0.074479	0.091649	0.088669	0.095884	0.081736	0.081761	0.078672	0.086603	0.06785	0.079985	0.082701	0.096638
2407.16	0.075001	0.09206	0.089111	0.096253	0.082078	0.082297	0.079305	0.087062	0.06836	0.080606	0.083188	0.097103
2409.09	0.075366	0.092407	0.089464	0.096638	0.082537	0.08277	0.079906	0.087484	0.068764	0.081139	0.083669	0.097658
2411.02	0.075658	0.092845	0.08978	0.097131	0.083014	0.083243	0.080216	0.088089	0.069281	0.081757	0.084259	0.09823
2412.95	0.076047	0.093328	0.090291	0.097596	0.083502	0.083748	0.080561	0.08868	0.069685	0.082307	0.084783	0.0989
2414.88	0.076382	0.09384	0.090771	0.09796	0.083956	0.084168	0.081104	0.089161	0.069979	0.082675	0.085153	0.099505
2416.81	0.076751	0.094279	0.091029	0.098373	0.084396	0.084561	0.081629	0.08958	0.070414	0.083176	0.085591	0.099927
2418.74	0.077049	0.09471	0.091385	0.098929	0.084823	0.084993	0.081969	0.090048	0.07108	0.083831	0.086088	0.100227
2420.66	0.077435	0.095005	0.091816	0.099261	0.085239	0.085465	0.08236	0.090563	0.071608	0.084348	0.086643	0.100796
2422.59	0.077777	0.095452	0.092212	0.099619	0.085775	0.086018	0.082749	0.091106	0.072079	0.08477	0.08713	0.101435
2424.52	0.078169	0.095976	0.092605	0.100096	0.086259	0.08647	0.083205	0.091631	0.07256	0.085376	0.087645	0.101943
2426.45	0.07857	0.096534	0.093108	0.100619	0.086676	0.086919	0.083845	0.092107	0.072981	0.085893	0.088308	0.102635
2428.38	0.079001	0.097091	0.093585	0.101243	0.087183	0.087404	0.084409	0.092699	0.073604	0.08636	0.088913	0.103331
2430.31	0.079552	0.097352	0.093963	0.101752	0.087707	0.087918	0.084935	0.093299	0.074137	0.086871	0.089462	0.103747
2432.24	0.080016	0.097703	0.094364	0.102154	0.088159	0.088566	0.085431	0.093817	0.074727	0.087395	0.090102	0.104265
2434.17	0.080432	0.098265	0.094766	0.102663	0.088723	0.089111	0.085932	0.094345	0.075375	0.088061	0.090655	0.104867
2436.09	0.08084	0.098796	0.095236	0.103131	0.089206	0.08961	0.086449	0.094933	0.075871	0.088626	0.091135	0.105412
2438.02	0.081376	0.09926	0.095783	0.103623	0.089501	0.090083	0.087108	0.0956	0.076283	0.089078	0.091741	0.10613
2439.95	0.08194	0.099793	0.096416	0.104243	0.09	0.09068	0.087733	0.096152	0.076834	0.089693	0.092431	0.106789
2441.88	0.082434	0.100422	0.097043	0.104671	0.090769	0.091323	0.088359	0.096707	0.077491	0.090427	0.092985	0.107459
2443.81	0.082943	0.100927	0.097537	0.105138	0.09148	0.091855	0.089138	0.097334	0.078224	0.091141	0.093606	0.107981
2445.74	0.083496	0.101425	0.098064	0.105791	0.091993	0.092428	0.089797	0.097954	0.078869	0.09178	0.094324	0.108488
2447.67	0.084031	0.1019	0.098645	0.106442	0.092569	0.093063	0.090336	0.098518	0.079488	0.092371	0.09498	0.109172
2449.6	0.084674	0.102262	0.099128	0.106971	0.093114	0.093673	0.090816	0.099031	0.080211	0.092946	0.095681	0.10992
2451.53	0.085305	0.102832	0.099721	0.107458	0.093582	0.094214	0.091424	0.099709	0.080712	0.093401	0.09608	0.110574
2453.45	0.085594	0.103437	0.100291	0.108069	0.094123	0.094817	0.09194	0.100435	0.081084	0.093937	0.09662	0.111245
2455.38	0.086008	0.103841	0.100668	0.108682	0.094759	0.095361	0.092555	0.101044	0.081572	0.094639	0.097444	0.111989
2457.31	0.086589	0.104322	0.101092	0.109005	0.095425	0.095865	0.093156	0.101628	0.082205	0.095253	0.098051	0.112579
2459.24	0.087052	0.104984	0.101656	0.10941	0.095933	0.096456	0.093618	0.102261	0.082742	0.095806	0.098563	0.113143
2461.17	0.087539	0.105615	0.102204	0.110078	0.096425	0.097114	0.094264	0.10277	0.083333	0.09632	0.09914	0.113771
2463.1	0.087916	0.10608	0.102627	0.110741	0.096908	0.097699	0.094951	0.103339	0.083951	0.096962	0.099875	0.114446
2465.03	0.088408	0.106539	0.103075	0.111322	0.097434	0.098231	0.095492	0.104039	0.084494	0.097665	0.10049	0.115134
2466.96	0.08898	0.107132	0.103582	0.111744	0.098052	0.098802	0.095974	0.10455	0.085067	0.098137	0.101027	0.11579
2468.88	0.089343	0.107683	0.104076	0.112224	0.098634	0.099357	0.096479	0.105137	0.085516	0.098644	0.101579	0.116344
2470.81	0.089727	0.108198	0.104411	0.112768	0.099229	0.099921	0.096903	0.105744	0.086038	0.099384	0.102059	0.11704
2472.74	0.090222	0.108685	0.104912	0.113202	0.099645	0.100452	0.097443	0.10628	0.08668	0.100022	0.1027	0.117667
2474.67	0.090703	0.109201	0.105549	0.113827	0.100078	0.101159	0.098055	0.106868	0.087313	0.100582	0.103442	0.118209
2476.6	0.091288	0.10977	0.106015	0.114485	0.100752	0.101829	0.098589	0.107437	0.087942	0.101228	0.104059	0.118756
2478.53	0.091854	0.110392	0.106497	0.115009	0.101293	0.102325	0.099301	0.108162	0.088709	0.101865	0.104759	0.119392
2480.46	0.092286	0.110902	0.107013	0.115634	0.101878	0.103009	0.100012	0.108915	0.089461	0.102486	0.105418	0.120201
2482.39	0.092703	0.11133	0.107582	0.116197	0.102499	0.103693	0.10062	0.109527	0.090198	0.103216	0.106033	0.120976
2484.32	0.093224	0.111864	0.108208	0.11664	0.103148	0.104279	0.101296	0.110073	0.090809	0.103859	0.106656	0.121632
2486.24	0.093838	0.112449	0.108784	0.117144	0.103807	0.105069	0.101886	0.110611	0.091133	0.104567	0.107447	0.122254
2488.17	0.094338	0.112916	0.109243	0.117658	0.10425	0.105731	0.10247	0.111277	0.091698	0.105193	0.108083	0.122758
2490.1	0.094851	0.113365	0.109642	0.118188	0.104843	0.106132	0.103139	0.112011	0.092291	0.105837	0.108619	0.123384
2492.03	0.095442	0.113978	0.110232	0.118787	0.105621	0.106649	0.103904	0.112704	0.092835	0.106617	0.1095	0.124225
2493.96	0.095992	0.114508	0.110749	0.119313	0.106239	0.10728	0.104604	0.113401	0.093594	0.107316	0.110181	0.124946
2495.89	0.096483	0.114965	0.111233	0.11978	0.106772	0.107867	0.105165	0.113965	0.094216	0.107923	0.110748	0.125648
2497.82	0.096958	0.115546	0.11183	0.120316	0.107363	0.108524	0.105733	0.114547	0.09477	0.108278	0.111353	0.126207
2499.75	0.097529	0.11603	0.112331	0.12087	0.107954	0.109243	0.106376	0.115216	0.09539	0.108862	0.112043	0.12677
2501.67	0.098116	0.116522	0.112875	0.121322	0.108474	0.109724	0.106882	0.115818	0.096038	0.109566	0.112722	0.127389
2503.6	0.09853	0.116964	0.113329	0.12171	0.109044	0.110136	0.107449	0.11631	0.09674	0.110012	0.11319	0.127966
2505.53	0.098892	0.117363	0.113668	0.122203	0.109507	0.110547	0.108044	0.11695	0.097357	0.110569	0.113551	0.128569
2507.46	0.099149	0.117901	0.114082	0.122739	0.109964	0.110972	0.108444	0.117592	0.097753	0.111173	0.114045	0.129064
2509.39	0.099499	0.118333	0.114522	0.123167	0.110467	0.111597	0.108922	0.118052	0.098014	0.111606	0.114656	0.129718
2511.32	0.099863	0.118706	0.114947	0.123614	0.11087	0.112157	0.109419	0.118492	0.098471	0.112027	0.115207	0.130375
2513.25	0.10011	0.119196	0.115431	0.124143	0.111335	0.112692	0.109928	0.119076	0.099066	0.112693	0.115818	0.130854
2515.18	0.100489	0.119558	0.115806	0.124622	0.111852	0.113248	0.110512	0.11964	0.099522	0.113402	0.116318	0.131374
2517.1	0.100962	0.120061	0.116229	0.124934	0.112457	0.113794	0.111049	0.120093	0.099984	0.113764	0.116788	0.131864
2519.03	0.101285	0.120611	0.116681	0.125243	0.112863	0.114301	0.111502	0.120597	0.100518	0.114143	0.117227	0.132315
2520.96	0.101606	0.120814	0.116887	0.125771	0.113112	0.114782	0.111912	0.121142	0.101091	0.114646	0.117701	0.132842
2522.89	0.101932	0.121372	0.117278	0.126291	0.113588	0.115345	0.112454	0.121773	0.101601	0.115097	0.118229	0.133264
2524.82	0.102246	0.121955	0.117747	0.126749	0.114132	0.115867	0.112995	0.122304	0.102066	0.115568	0.118673	0.133741
2526.75	0.102673	0.122278	0.118084	0.127165	0.114562	0.116324	0.113361	0.122585	0.102389	0.116012	0.119212	0.134398
2528.68	0.103054	0.122621	0.118541	0.127538	0.115027	0.116832	0.113853	0.123089	0.102802	0.116578	0.119776	0.134876
2530.61	0.10346	0.122947	0.118932	0.128063	0.11559	0.117317	0.114425	0.123807	0.103277	0.117203	0.120233	0.135415
2532.54	0.104033	0.12346	0.119295	0.128578	0.116109	0.11787	0.114979	0.124193	0.103784	0.11761	0.120891	0.136117
2534.46	0.104547	0.123899	0.119796	0.128829	0.116512	0.118346	0.11546	0.124653	0.10434	0.118105	0.12156	0.136586
2536.39	0.104976	0.124297	0.120321	0.129262	0.11705	0.118671	0.115822	0.125285	0.104853	0.118686	0.122063	0.136941
2538.32	0.105387	0.124645	0.12065	0.129788	0.117522	0.119208	0.116308	0.12573	0.105448	0.119042	0.122464	0.137502
2540.25	0.105726	0.124932	0.120935	0.130102	0.117954	0.119606	0.116799	0.126192	0.105927	0.119476	0.122683	0.137985
2542.18	0.106173	0.125436	0.121409	0.130363	0.118412	0.119944	0.117181	0.126621	0.106283	0.119931	0.122981	0.138423
2544.11	0.106638	0.125896	0.121915	0.130659	0.118821	0.120519	0.117716	0.12711	0.106776	0.120336	0.123602	0.138994
2546.04	0.106998	0.12636	0.122415	0.131203	0.119332	0.121134	0.118227	0.127719	0.107348	0.120849	0.12419	0.139405
2547.97	0.107358	0.126903	0.122864	0.131773	0.119763	0.121575	0.118786	0.128181	0.107762	0.121181	0.124614	0.139866
2549.89	0.107648	0.127269	0.123281	0.132229	0.120277	0.122055	0.119323	0.12859	0.108193	0.12174	0.125123	0.140476
2551.82	0.10801	0.12769	0.123776	0.132734	0.120721	0.122592	0.11985	0.129076	0.108809	0.122589	0.125687	0.141035
2553.75	0.108614	0.128175	0.124188	0.133199	0.121226	0.123027	0.120321	0.129661	0.109405	0.123106	0.126256	0.141581
2555.68	0.108989	0.128574	0.124542	0.133629	0.121889	0.123444	0.120695	0.130258	0.109915	0.12356	0.126619	0.142219
2557.61	0.109272	0.128833	0.124767	0.134051	0.122324	0.123833	0.121139	0.130769	0.110327	0.124023	0.1271	0.142796
2559.54	0.10968	0.129269	0.125067	0.134442	0.122693	0.124293	0.121473	0.131187	0.110584	0.124547	0.127872	0.143203
2561.47	0.109974	0.129788	0.125369	0.134896	0.122966	0.124783	0.121762	0.131523	0.111086	0.125233	0.128288	0.143772
2563.4	0.110325	0.130173	0.125644	0.135383	0.123413	0.125276	0.122181	0.132	0.111814	0.125643	0.128761	0.144513
2565.33	0.11085	0.130607	0.12616	0.135743	0.123944	0.125693	0.122729	0.132515	0.112273	0.125965	0.129405	0.14504
2567.25	0.111289	0.131067	0.126664	0.136132	0.124405	0.126216	0.123269	0.133033	0.112636	0.126327	0.12986	0.145546
2569.18	0.111549	0.131587	0.127195	0.136718	0.12494	0.126828	0.123929	0.133624	0.113252	0.126745	0.130297	0.146153
2571.11	0.111957	0.132073	0.127694	0.137265	0.125422	0.127536	0.124517	0.134227	0.113746	0.127523	0.13082	0.146691
2573.04	0.112582	0.132641	0.128171	0.137785	0.125861	0.12819	0.125052	0.134813	0.114175	0.128383	0.131438	0.147302
2574.97	0.113082	0.133127	0.128746	0.138325	0.126329	0.128555	0.125642	0.135372	0.114688	0.128803	0.131961	0.147855
2576.9	0.113499	0.133728	0.129302	0.138822	0.126861	0.128956	0.126198	0.136026	0.115402	0.129178	0.132606	0.148337
2578.83	0.113912	0.134385	0.129829	0.139241	0.12767	0.129443	0.126808	0.136721	0.116027	0.129984	0.133235	0.149025
2580.76	0.114431	0.134868	0.130255	0.139618	0.128348	0.130051	0.127566	0.137347	0.116576	0.130762	0.133903	0.149866
2582.68	0.115058	0.135468	0.130773	0.140302	0.128799	0.130926	0.128328	0.138137	0.11739	0.13129	0.134792	0.150454
2584.61	0.115671	0.13603	0.131403	0.14117	0.129354	0.131733	0.128961	0.138899	0.118033	0.131789	0.135525	0.151106
2586.54	0.116303	0.136441	0.132008	0.141834	0.130038	0.13233	0.129603	0.139494	0.118542	0.132621	0.136088	0.152035
2588.47	0.116892	0.136991	0.132637	0.142299	0.130883	0.132834	0.130326	0.140067	0.119295	0.133401	0.136835	0.152821
2590.4	0.117483	0.137673	0.133185	0.142814	0.131513	0.133477	0.131069	0.140598	0.120123	0.134169	0.137484	0.153525
2592.33	0.118038	0.138189	0.133734	0.143434	0.132142	0.134162	0.131756	0.141328	0.120783	0.134852	0.138152	0.154178
2594.26	0.118471	0.138791	0.134415	0.144047	0.132802	0.134705	0.132484	0.142137	0.121412	0.13539	0.138947	0.154792
2596.19	0.118929	0.139232	0.134931	0.144549	0.133325	0.135346	0.133049	0.142813	0.121953	0.136102	0.139589	0.155537
2598.12	0.119571	0.139628	0.135424	0.144931	0.133906	0.136	0.133574	0.143481	0.122695	0.136635	0.14033	0.156357
2600.04	0.120177	0.140296	0.135873	0.145512	0.134678	0.1366	0.134336	0.144203	0.123389	0.137182	0.141072	0.157177
2601.97	0.12062	0.141097	0.136484	0.146258	0.135406	0.137407	0.13502	0.144824	0.123863	0.137952	0.141743	0.157932
2603.9	0.121121	0.141803	0.137167	0.146986	0.135935	0.138205	0.135595	0.145425	0.124404	0.138661	0.142542	0.158651
2605.83	0.121675	0.142448	0.137685	0.147608	0.136521	0.138796	0.136424	0.146127	0.125145	0.13932	0.143205	0.15938
2607.76	0.122269	0.143057	0.138214	0.148078	0.13722	0.139415	0.137153	0.14691	0.125881	0.140076	0.143596	0.159979
2609.69	0.1229	0.143565	0.138695	0.148674	0.137842	0.140104	0.137556	0.147606	0.12645	0.140731	0.144274	0.160646
2611.62	0.12334	0.144014	0.139219	0.149446	0.138346	0.140854	0.138048	0.148254	0.127008	0.141416	0.145108	0.1614
2613.55	0.123776	0.144435	0.139734	0.149959	0.138881	0.141436	0.138751	0.148876	0.12774	0.142105	0.145834	0.162108
2615.47	0.124294	0.145135	0.140342	0.150486	0.1394	0.141991	0.139407	0.149355	0.128439	0.142658	0.146652	0.162769
2617.4	0.124937	0.145844	0.140932	0.151236	0.139949	0.1427	0.140071	0.150088	0.129085	0.143474	0.147314	0.163549
2619.33	0.125575	0.146443	0.141576	0.151825	0.140836	0.143429	0.140893	0.150897	0.129793	0.144345	0.148076	0.164304
2621.26	0.12623	0.147194	0.142191	0.15246	0.14169	0.144219	0.1416	0.151628	0.130493	0.14512	0.149011	0.165051
2623.19	0.126801	0.147886	0.142748	0.153225	0.142492	0.144951	0.142165	0.152532	0.13123	0.145869	0.149685	0.165886
2625.12	0.127379	0.14848	0.143466	0.153847	0.143366	0.145547	0.142779	0.153304	0.131898	0.146492	0.150335	0.166523
2627.05	0.128136	0.149094	0.144109	0.154514	0.143994	0.146217	0.143567	0.153871	0.132754	0.147278	0.151001	0.167271
2628.98	0.12871	0.149719	0.144803	0.155195	0.14459	0.146995	0.144442	0.154741	0.133467	0.147973	0.151633	0.168265
2630.91	0.129376	0.150435	0.145617	0.15575	0.1454	0.147669	0.14521	0.155656	0.133905	0.148651	0.15227	0.169005
2632.83	0.129975	0.151039	0.146182	0.156345	0.146078	0.148345	0.145912	0.156164	0.134649	0.149313	0.152995	0.169462
2634.76	0.130508	0.151553	0.14666	0.156955	0.146709	0.149007	0.146515	0.156752	0.135493	0.149835	0.153747	0.170015
2636.69	0.13101	0.152129	0.14714	0.157493	0.147266	0.149545	0.147078	0.157498	0.136039	0.150513	0.154429	0.170757
2638.62	0.131579	0.15278	0.147717	0.15813	0.147747	0.150159	0.147744	0.158225	0.136755	0.151445	0.155108	0.171655
2640.55	0.132304	0.153499	0.148472	0.158927	0.148522	0.150853	0.148432	0.158822	0.137658	0.152297	0.155881	0.17254
2642.48	0.133038	0.154186	0.149266	0.159538	0.149187	0.151603	0.149124	0.159414	0.138331	0.15291	0.156738	0.173196
2644.41	0.13358	0.154774	0.149937	0.160054	0.149644	0.152442	0.149935	0.160155	0.139087	0.153541	0.157416	0.173816
2646.34	0.134007	0.155178	0.150324	0.160591	0.15029	0.153133	0.150626	0.160867	0.139687	0.154177	0.157994	0.174449
2648.26	0.134529	0.155794	0.150927	0.161154	0.151067	0.153663	0.151229	0.161595	0.140166	0.154798	0.158762	0.175235
2650.19	0.135012	0.15646	0.151617	0.161703	0.15178	0.154294	0.151814	0.162284	0.140823	0.155412	0.15949	0.175973
2652.12	0.135531	0.156999	0.152019	0.162435	0.152395	0.154959	0.152361	0.162805	0.141339	0.156123	0.159996	0.176486
2654.05	0.136063	0.15759	0.152539	0.163098	0.152991	0.155557	0.152959	0.163336	0.141855	0.156861	0.160718	0.177224
2655.98	0.13676	0.158235	0.153134	0.163706	0.153616	0.156184	0.153627	0.163924	0.142645	0.157569	0.161443	0.178117
2657.91	0.137485	0.159093	0.153786	0.164456	0.15415	0.156833	0.154314	0.164579	0.143492	0.158113	0.161965	0.178808
2659.84	0.138145	0.159901	0.154496	0.165151	0.154813	0.157554	0.155024	0.165382	0.144191	0.158832	0.162672	0.17952
2661.77	0.138728	0.160536	0.155095	0.165718	0.155557	0.15833	0.155886	0.166148	0.144855	0.15963	0.163517	0.18034
2663.69	0.139227	0.161064	0.155639	0.166315	0.1563	0.159144	0.156433	0.16694	0.145537	0.160168	0.164201	0.180805
2665.62	0.139783	0.16159	0.156128	0.166993	0.157087	0.159935	0.156972	0.16756	0.146428	0.160816	0.164836	0.181438
2667.55	0.140321	0.162288	0.156838	0.167628	0.157762	0.160505	0.157751	0.168176	0.147284	0.161665	0.165723	0.182309
2669.48	0.140931	0.163046	0.157558	0.168415	0.158503	0.161085	0.158445	0.168964	0.147864	0.162548	0.16639	0.183058
2671.41	0.141613	0.163535	0.157928	0.169054	0.159205	0.161708	0.159099	0.16961	0.14854	0.1632	0.166927	0.18374
2673.34	0.142303	0.163965	0.158378	0.169462	0.15986	0.162381	0.159799	0.170403	0.149229	0.163786	0.167529	0.184523
2675.27	0.142946	0.164621	0.159024	0.170107	0.160551	0.163091	0.160549	0.171127	0.149888	0.16456	0.16836	0.185282
2677.2	0.143293	0.165273	0.159668	0.170872	0.161138	0.163795	0.161298	0.171754	0.150521	0.165181	0.169218	0.18594
2679.13	0.143882	0.16588	0.160244	0.171492	0.161804	0.164605	0.162068	0.172722	0.151132	0.165936	0.169953	0.186717
2681.05	0.144704	0.166638	0.16105	0.172142	0.162564	0.165343	0.162862	0.173454	0.152003	0.166894	0.170738	0.187557
2682.98	0.145466	0.167382	0.161886	0.172879	0.163523	0.166184	0.16366	0.174083	0.152997	0.16753	0.17151	0.188552
2684.91	0.146097	0.168082	0.162532	0.173509	0.164332	0.166881	0.164309	0.174938	0.153698	0.168297	0.172246	0.189449
2686.84	0.146526	0.168738	0.163227	0.174026	0.164831	0.167601	0.165054	0.175712	0.154242	0.169187	0.173075	0.190118
2688.77	0.14726	0.169118	0.16367	0.174545	0.165464	0.168331	0.165745	0.176547	0.154866	0.169774	0.173779	0.190686
2690.7	0.147979	0.169546	0.164035	0.175226	0.166143	0.168982	0.166452	0.177277	0.155784	0.170333	0.174396	0.191295
2692.63	0.148533	0.170214	0.164701	0.176033	0.166866	0.169657	0.167326	0.17778	0.156573	0.171002	0.175149	0.19208
2694.56	0.14915	0.170997	0.165514	0.176581	0.167719	0.170298	0.168096	0.178472	0.157064	0.171842	0.17585	0.193177
2696.48	0.149724	0.171651	0.166163	0.177255	0.168419	0.171063	0.16876	0.179408	0.157847	0.172768	0.176638	0.193987
2698.41	0.150285	0.172322	0.166811	0.17806	0.169096	0.171943	0.169548	0.180407	0.158695	0.173402	0.177463	0.194513
2700.34	0.150854	0.173116	0.167495	0.178726	0.169846	0.172861	0.170369	0.181351	0.159525	0.174382	0.178322	0.195449
2702.27	0.151621	0.173836	0.168107	0.179493	0.170784	0.173619	0.171046	0.182145	0.16046	0.175473	0.179203	0.196575
2704.2	0.152359	0.174566	0.168803	0.180257	0.171581	0.174361	0.171794	0.182892	0.161126	0.176249	0.180124	0.197758
2706.13	0.153042	0.175301	0.169594	0.18108	0.172199	0.1753	0.172617	0.183668	0.16196	0.17698	0.181019	0.198726
2708.06	0.153821	0.17616	0.170236	0.182033	0.173075	0.176228	0.173482	0.184429	0.162843	0.17773	0.181988	0.199594
2709.99	0.154737	0.177217	0.171155	0.183077	0.174092	0.177055	0.174328	0.185469	0.163817	0.178764	0.183068	0.20053
2711.92	0.155846	0.178308	0.172365	0.183993	0.175354	0.17807	0.175483	0.186665	0.165074	0.179968	0.184316	0.201342
2713.84	0.156824	0.179375	0.173458	0.184994	0.176576	0.17928	0.176751	0.187641	0.166286	0.181245	0.185433	0.202526
2715.77	0.157817	0.180491	0.174534	0.186059	0.177728	0.180434	0.17775	0.1889	0.167562	0.182353	0.186416	0.2039
2717.7	0.158823	0.18151	0.175405	0.187198	0.178878	0.181545	0.178983	0.190221	0.168682	0.183451	0.187574	0.205122
2719.63	0.159696	0.182316	0.1761	0.188277	0.179916	0.182731	0.180302	0.191244	0.169625	0.184611	0.188825	0.206258
2721.56	0.160659	0.183251	0.177058	0.189073	0.180861	0.183619	0.181294	0.192177	0.170616	0.185594	0.189886	0.207289
2723.49	0.161548	0.184254	0.177984	0.189853	0.181754	0.184322	0.182008	0.19311	0.171701	0.18663	0.19072	0.208436
2725.42	0.162432	0.185011	0.178785	0.190695	0.182651	0.185287	0.182925	0.194223	0.172794	0.187746	0.191902	0.209501
2727.35	0.163413	0.185884	0.179794	0.191559	0.1836	0.186657	0.184082	0.1954	0.174216	0.188997	0.193158	0.210496
2729.27	0.16442	0.187031	0.180964	0.192594	0.184805	0.187878	0.185392	0.196481	0.175438	0.190258	0.194332	0.2116
2731.2	0.165476	0.188101	0.182046	0.193751	0.185946	0.18883	0.186726	0.197597	0.175988	0.191169	0.195333	0.212891
2733.13	0.166489	0.18916	0.182964	0.194813	0.187008	0.189926	0.187652	0.198688	0.176742	0.192106	0.196262	0.213873
2735.06	0.167368	0.190062	0.183716	0.195625	0.187989	0.190888	0.188499	0.199615	0.177979	0.193278	0.197314	0.214763
2736.99	0.168108	0.190793	0.184461	0.196301	0.188766	0.191745	0.189278	0.200429	0.178954	0.194247	0.198238	0.215819
2738.92	0.168772	0.191629	0.185447	0.197193	0.18953	0.192635	0.190084	0.201154	0.179677	0.19495	0.199066	0.216704
2740.85	0.169557	0.192382	0.186222	0.197954	0.190433	0.193459	0.190916	0.201967	0.180522	0.195777	0.199772	0.217536
2742.78	0.17035	0.193002	0.186711	0.198675	0.191244	0.19425	0.191638	0.20299	0.181497	0.196774	0.200442	0.218228
2744.71	0.170949	0.193581	0.187219	0.199259	0.192094	0.195012	0.192439	0.203892	0.18228	0.197459	0.201272	0.219085
2746.63	0.171438	0.19425	0.187964	0.199819	0.192923	0.195919	0.193246	0.204686	0.182824	0.198023	0.202186	0.220061
2748.56	0.171992	0.195145	0.188807	0.200613	0.193719	0.196866	0.194271	0.205588	0.183803	0.199049	0.203153	0.220984
2750.49	0.172913	0.196021	0.189696	0.201725	0.194826	0.19792	0.195463	0.206594	0.184974	0.200143	0.204362	0.222167
2752.42	0.173964	0.197054	0.190672	0.203048	0.196055	0.199218	0.196571	0.207914	0.186276	0.201324	0.205423	0.223402
2754.35	0.175041	0.198129	0.191527	0.204096	0.197193	0.200358	0.197543	0.209103	0.187633	0.202597	0.206462	0.2244
2756.28	0.176088	0.19929	0.192592	0.205017	0.198258	0.20138	0.198516	0.210188	0.188593	0.203644	0.207472	0.225522
2758.21	0.177001	0.200352	0.193595	0.20597	0.199236	0.202498	0.199655	0.211495	0.18953	0.204645	0.208723	0.226586
2760.14	0.177917	0.201172	0.194471	0.207035	0.20022	0.203544	0.200896	0.21258	0.190671	0.205808	0.21015	0.227721
2762.06	0.178733	0.202152	0.195298	0.208106	0.201445	0.204572	0.202178	0.213479	0.191861	0.206817	0.211166	0.229145
2763.99	0.179799	0.203357	0.196397	0.209152	0.202639	0.205848	0.203247	0.214716	0.193084	0.207824	0.212113	0.230344
2765.92	0.180988	0.204536	0.197659	0.210367	0.203776	0.207081	0.204382	0.215943	0.194211	0.209199	0.213308	0.231469
2767.85	0.182113	0.205645	0.198753	0.211523	0.205106	0.20832	0.205751	0.217139	0.195629	0.210749	0.21459	0.232713
2769.78	0.183418	0.207006	0.200126	0.21263	0.206541	0.20973	0.207135	0.218527	0.197005	0.212067	0.215942	0.233944
2771.71	0.184664	0.208289	0.201459	0.21379	0.20786	0.211106	0.20833	0.219895	0.198155	0.213208	0.217594	0.235382
2773.64	0.185786	0.209571	0.202619	0.215042	0.209138	0.212444	0.209597	0.221154	0.199655	0.214548	0.219125	0.237058
2775.57	0.187221	0.211049	0.203904	0.216516	0.210694	0.213815	0.21106	0.222496	0.201412	0.21626	0.220715	0.238546
2777.5	0.188791	0.212212	0.205132	0.218042	0.212395	0.215266	0.212726	0.224102	0.203242	0.217927	0.222448	0.240082
2779.42	0.190191	0.213547	0.206587	0.219412	0.213878	0.21672	0.214447	0.225757	0.204809	0.219667	0.22388	0.241762
2781.35	0.191692	0.215277	0.208223	0.220917	0.215321	0.218182	0.21587	0.22736	0.206249	0.221357	0.225287	0.243413
2783.28	0.193179	0.216762	0.209567	0.222571	0.216955	0.219901	0.217548	0.229021	0.207759	0.222841	0.22701	0.245176
2785.21	0.194512	0.218403	0.211167	0.223921	0.218676	0.221599	0.219535	0.230773	0.209476	0.224698	0.228939	0.247101
2787.14	0.195913	0.219854	0.212874	0.225343	0.220175	0.223162	0.221176	0.23237	0.211261	0.22664	0.230803	0.24892
2789.07	0.197573	0.221421	0.21432	0.227081	0.22187	0.224871	0.222572	0.234288	0.213117	0.22836	0.232569	0.250801
2791	0.199489	0.223302	0.215743	0.228919	0.223963	0.226853	0.224343	0.236436	0.215272	0.230215	0.234564	0.253096
2792.93	0.201368	0.224982	0.217516	0.230999	0.225908	0.228745	0.226426	0.238369	0.217352	0.232404	0.236585	0.255251
2794.85	0.203248	0.226869	0.219626	0.23301	0.227689	0.230688	0.228199	0.240095	0.219298	0.234612	0.238622	0.256984
2796.78	0.204943	0.228872	0.221699	0.234898	0.229466	0.232681	0.230047	0.242008	0.221321	0.236573	0.240758	0.258782
2798.71	0.206517	0.230984	0.223571	0.236949	0.23132	0.23459	0.23234	0.244018	0.223522	0.238658	0.242942	0.261004
2800.64	0.208647	0.233242	0.225641	0.239122	0.233598	0.236924	0.234489	0.246092	0.225769	0.24103	0.245286	0.263412
2802.57	0.211013	0.23554	0.227872	0.241316	0.236035	0.239242	0.23655	0.24856	0.228033	0.243466	0.247842	0.265896
2804.5	0.213353	0.23789	0.230157	0.243541	0.238203	0.241583	0.238895	0.250964	0.230763	0.246258	0.250164	0.268656
2806.43	0.215875	0.240181	0.23235	0.245993	0.24056	0.244193	0.241396	0.253224	0.23362	0.249058	0.252683	0.271524
2808.36	0.218252	0.242778	0.234715	0.248555	0.243135	0.246766	0.24382	0.255769	0.236343	0.251711	0.255662	0.274313
2810.28	0.220898	0.245573	0.237443	0.251233	0.245872	0.249374	0.246296	0.258611	0.239106	0.254521	0.258547	0.277249
2812.21	0.22391	0.248449	0.240057	0.25421	0.248852	0.252113	0.249016	0.26129	0.242064	0.257552	0.261631	0.280395
2814.14	0.226803	0.251494	0.242976	0.257404	0.251858	0.254963	0.25196	0.264234	0.24532	0.260647	0.264954	0.283552
2816.07	0.229812	0.254556	0.246156	0.260468	0.25472	0.257933	0.255045	0.267237	0.248812	0.264092	0.268376	0.286718
2818	0.232763	0.257488	0.24915	0.263507	0.257733	0.261134	0.258109	0.270159	0.252198	0.267526	0.271779	0.290102
2819.93	0.236069	0.260688	0.252387	0.266868	0.261248	0.264504	0.261434	0.273382	0.255639	0.271058	0.27532	0.293921
2821.86	0.239855	0.264643	0.256124	0.270596	0.264808	0.267996	0.265136	0.27692	0.259783	0.27493	0.279229	0.297925
2823.79	0.243923	0.268846	0.260193	0.27459	0.268567	0.271772	0.268921	0.281016	0.264363	0.279258	0.283654	0.30219
2825.72	0.24847	0.273459	0.264749	0.279075	0.272956	0.276181	0.273272	0.285387	0.269203	0.284262	0.288537	0.306642
2827.64	0.253075	0.278429	0.269804	0.283947	0.277616	0.281018	0.277918	0.289896	0.27423	0.289253	0.293663	0.311448
2829.57	0.258147	0.283552	0.27485	0.2893	0.282814	0.286112	0.282885	0.29472	0.279608	0.294632	0.299325	0.317177
2831.5	0.264124	0.289464	0.280438	0.295354	0.288481	0.291779	0.288505	0.300351	0.286049	0.301044	0.305417	0.323592
2833.43	0.270709	0.296493	0.287231	0.302125	0.294683	0.298275	0.294817	0.30674	0.293323	0.308312	0.312461	0.330745
2835.36	0.2785	0.304757	0.29522	0.310144	0.302526	0.305842	0.302393	0.314218	0.301792	0.316805	0.321365	0.339189
2837.29	0.288712	0.314823	0.305175	0.32032	0.312444	0.315255	0.311752	0.323815	0.312361	0.32762	0.332259	0.349558
2839.22	0.301983	0.328043	0.317974	0.333386	0.32479	0.327574	0.32376	0.335626	0.325875	0.341543	0.345953	0.362713
2841.15	0.319128	0.34583	0.334965	0.350489	0.340794	0.343527	0.339521	0.350613	0.343768	0.359385	0.363752	0.380113
2843.07	0.341239	0.368773	0.357094	0.373026	0.361487	0.36407	0.359679	0.370215	0.3669	0.382474	0.38625	0.402615
2845	0.369545	0.397676	0.385309	0.401436	0.387973	0.390154	0.38492	0.3953	0.396086	0.411661	0.414721	0.431074
2846.93	0.40143	0.430536	0.416973	0.433684	0.417858	0.419853	0.413888	0.423532	0.429064	0.444663	0.447636	0.463211
2848.86	0.426389	0.456405	0.442008	0.458885	0.440974	0.443479	0.436441	0.445669	0.455181	0.471821	0.474725	0.489273
2850.79	0.433439	0.463472	0.449788	0.46638	0.446932	0.450072	0.442663	0.452637	0.463855	0.480908	0.483733	0.498724
2852.72	0.426098	0.455633	0.442741	0.459772	0.439838	0.443137	0.43679	0.446762	0.457854	0.474717	0.477402	0.493094
2854.65	0.414616	0.443226	0.430898	0.447966	0.429136	0.432827	0.426753	0.4371	0.446331	0.463273	0.46655	0.482087
2856.58	0.402768	0.431002	0.418926	0.435735	0.418476	0.422948	0.416883	0.427879	0.434524	0.451353	0.454779	0.470639
2858.51	0.39175	0.420011	0.408437	0.424565	0.409302	0.414011	0.408354	0.419577	0.423994	0.440826	0.444177	0.460413
2860.43	0.383134	0.41102	0.399684	0.415926	0.402548	0.407034	0.401606	0.413469	0.41573	0.432588	0.436115	0.452251
2862.36	0.377817	0.405206	0.393673	0.410194	0.398813	0.403131	0.397901	0.409985	0.41067	0.427148	0.430667	0.447035
2864.29	0.3756	0.402688	0.391512	0.407474	0.397797	0.402252	0.397319	0.409044	0.408755	0.424695	0.428622	0.445085
2866.22	0.376153	0.403189	0.392119	0.40822	0.399207	0.403564	0.399095	0.410673	0.409533	0.425209	0.429484	0.445949
2868.15	0.378291	0.405346	0.394178	0.410494	0.402027	0.40615	0.401629	0.41367	0.412272	0.427726	0.43177	0.448463
2870.08	0.380587	0.407589	0.396259	0.412472	0.404709	0.408984	0.40404	0.416105	0.414865	0.430377	0.434228	0.450482
2872.01	0.381854	0.408788	0.397181	0.413705	0.406083	0.410452	0.405537	0.417377	0.415703	0.431623	0.435319	0.451149
2873.94	0.381481	0.408455	0.396958	0.413374	0.40595	0.410082	0.40531	0.417528	0.415274	0.430788	0.434525	0.450897
2875.86	0.380165	0.407399	0.39592	0.412069	0.404372	0.408829	0.404286	0.416358	0.414386	0.429129	0.433193	0.449968
2877.79	0.379106	0.406351	0.394934	0.411398	0.403379	0.407572	0.403056	0.415306	0.412774	0.427702	0.431991	0.448701
2879.72	0.379042	0.406218	0.394964	0.411388	0.403139	0.407184	0.402292	0.414982	0.411692	0.426741	0.431121	0.448013
2881.65	0.380062	0.407299	0.396032	0.412269	0.403024	0.407519	0.402665	0.415751	0.412057	0.42705	0.431487	0.448457
2883.58	0.382022	0.409667	0.39807	0.414364	0.404714	0.409174	0.404322	0.417606	0.413634	0.428965	0.43338	0.450434
2885.51	0.385238	0.412897	0.401264	0.417396	0.408013	0.412161	0.407215	0.420084	0.417265	0.432925	0.436441	0.453744
2887.44	0.389836	0.417051	0.40536	0.421989	0.412156	0.415988	0.410896	0.42377	0.422324	0.437909	0.440866	0.45822
2889.37	0.39526	0.422696	0.410534	0.427619	0.416955	0.421026	0.415671	0.42822	0.427881	0.443488	0.446627	0.463428
2891.3	0.401161	0.428789	0.416613	0.433554	0.422564	0.426647	0.421268	0.433595	0.434007	0.449722	0.453195	0.469716
2893.22	0.407245	0.435204	0.422855	0.440129	0.42876	0.43269	0.427183	0.439793	0.44051	0.456701	0.460064	0.476709
2895.15	0.413816	0.442005	0.42959	0.447341	0.435299	0.439325	0.433293	0.446113	0.447743	0.464092	0.467494	0.483922
2897.08	0.42119	0.449251	0.437337	0.454739	0.442647	0.446522	0.440145	0.453331	0.455685	0.472184	0.4757	0.491675
2899.01	0.429263	0.457394	0.445516	0.462797	0.450741	0.454481	0.44788	0.461074	0.464544	0.48129	0.484582	0.500188
2900.94	0.437965	0.466288	0.45395	0.47177	0.459024	0.463201	0.456249	0.468705	0.474058	0.490404	0.493704	0.509351
2902.87	0.447722	0.476511	0.463422	0.481651	0.46823	0.472502	0.465777	0.47752	0.484132	0.500474	0.50339	0.519684
2904.8	0.459232	0.488352	0.474804	0.493296	0.479145	0.483271	0.476349	0.488565	0.496198	0.512319	0.515421	0.531876
2906.73	0.473361	0.50224	0.488854	0.507346	0.492485	0.496478	0.489218	0.502062	0.510535	0.526741	0.530356	0.545974
2908.65	0.490871	0.520017	0.506362	0.524996	0.509445	0.513006	0.506122	0.518366	0.528013	0.545145	0.5485	0.563606
2910.58	0.513395	0.543302	0.528798	0.547861	0.531007	0.534648	0.526968	0.538944	0.551089	0.568533	0.570858	0.586136
2912.51	0.541707	0.572113	0.556752	0.575748	0.557749	0.561258	0.55234	0.564216	0.580162	0.59772	0.59946	0.614261
2914.44	0.570912	0.601876	0.586518	0.605031	0.585798	0.589467	0.579628	0.591333	0.610914	0.628955	0.630781	0.645411
2916.37	0.591427	0.623141	0.607692	0.626739	0.605571	0.609872	0.599595	0.611304	0.63382	0.652056	0.653839	0.668356
2918.3	0.59854	0.630352	0.614988	0.634082	0.611456	0.616337	0.606463	0.617757	0.642545	0.660846	0.662777	0.676365
2920.23	0.596933	0.628372	0.613548	0.632773	0.608241	0.614313	0.605118	0.616264	0.641323	0.659793	0.661468	0.676476
2922.16	0.591382	0.622505	0.60815	0.627454	0.6023	0.608908	0.600662	0.611659	0.636223	0.655248	0.656301	0.672303
2924.09	0.58364	0.613793	0.600308	0.61879	0.595092	0.60221	0.593583	0.605419	0.628782	0.647693	0.64883	0.66428
2926.01	0.573868	0.60307	0.58992	0.60868	0.586334	0.593686	0.58453	0.596884	0.618391	0.637708	0.638877	0.653864
2927.94	0.562608	0.590899	0.578039	0.596969	0.576209	0.582806	0.574411	0.586486	0.606099	0.626099	0.626743	0.642055
2929.87	0.549959	0.577915	0.564794	0.583628	0.56473	0.570639	0.562892	0.576141	0.593371	0.612328	0.613576	0.62894
2931.8	0.535465	0.563698	0.551034	0.569659	0.552477	0.558191	0.550432	0.564099	0.57926	0.597072	0.59958	0.614872
2933.73	0.519864	0.548417	0.5364	0.554411	0.539418	0.545109	0.537263	0.551103	0.563537	0.581095	0.583403	0.599635
2935.66	0.50479	0.532813	0.520336	0.538136	0.525966	0.531174	0.52378	0.537764	0.547874	0.565271	0.567115	0.583079
2937.59	0.48958	0.516977	0.504738	0.522416	0.512334	0.517233	0.51062	0.523784	0.532197	0.549157	0.551772	0.567325
2939.52	0.474659	0.501854	0.489961	0.507678	0.498802	0.504268	0.497904	0.510932	0.517274	0.533802	0.536596	0.552581
2941.44	0.461538	0.488206	0.47633	0.494399	0.487158	0.492811	0.485963	0.499845	0.503833	0.520207	0.523037	0.539518
2943.37	0.450432	0.477306	0.465139	0.48301	0.47809	0.483176	0.476012	0.490592	0.492463	0.508613	0.5119	0.529298
2945.3	0.442612	0.469286	0.456745	0.474494	0.471363	0.476169	0.4691	0.483646	0.48462	0.500712	0.503738	0.521084
2947.23	0.437744	0.463954	0.451087	0.469636	0.467412	0.471992	0.464906	0.479551	0.480255	0.496629	0.498506	0.516368
2949.16	0.435201	0.461256	0.44846	0.467248	0.466054	0.470175	0.463647	0.477973	0.478351	0.49452	0.496425	0.514783
2951.09	0.434933	0.460844	0.44846	0.466457	0.466521	0.470531	0.464326	0.478439	0.478287	0.494375	0.496658	0.514627
2953.02	0.435482	0.461555	0.448922	0.466577	0.467946	0.47212	0.465905	0.479767	0.479647	0.496066	0.497692	0.515375
2954.95	0.435589	0.461292	0.448716	0.465917	0.468578	0.472949	0.46721	0.48022	0.480284	0.496236	0.498336	0.515615
2956.87	0.434262	0.459365	0.447304	0.464237	0.467502	0.471877	0.466698	0.479604	0.478678	0.494415	0.496521	0.514222
2958.8	0.430559	0.456044	0.443676	0.460788	0.464669	0.469136	0.464115	0.477544	0.475121	0.490991	0.492889	0.510644
2960.73	0.424471	0.450356	0.438023	0.454847	0.460118	0.464618	0.459561	0.473005	0.4693	0.484821	0.48701	0.505054
2962.66	0.417003	0.442534	0.430509	0.447588	0.453526	0.457815	0.453141	0.466217	0.461249	0.476825	0.47911	0.497538
2964.59	0.408225	0.433795	0.421879	0.438905	0.445297	0.449581	0.444891	0.458249	0.451559	0.467286	0.470465	0.488496
2966.52	0.397982	0.423873	0.412272	0.428612	0.436066	0.439987	0.435468	0.449308	0.440904	0.456564	0.45959	0.478187
2968.45	0.387223	0.412981	0.40178	0.41759	0.426289	0.429763	0.425916	0.43929	0.42965	0.445831	0.447582	0.466974
2970.38	0.376408	0.402167	0.391448	0.406682	0.41611	0.419963	0.416152	0.429358	0.418524	0.434519	0.436762	0.455828
2972.31	0.366161	0.392283	0.381515	0.396794	0.40644	0.410028	0.406479	0.419969	0.408013	0.42304	0.426167	0.444996
2974.23	0.356776	0.382847	0.371886	0.387529	0.397435	0.400529	0.397214	0.41096	0.397373	0.412578	0.415483	0.434755
2976.16	0.348197	0.373697	0.363238	0.378591	0.388582	0.391978	0.388721	0.402427	0.387558	0.403055	0.405721	0.425606
2978.09	0.339689	0.365039	0.354714	0.370235	0.38024	0.383868	0.380687	0.394124	0.378271	0.393844	0.396688	0.416701
2980.02	0.331497	0.357311	0.346815	0.362188	0.372439	0.375922	0.373058	0.386267	0.36919	0.384954	0.388137	0.408054
2981.95	0.32409	0.350073	0.339676	0.354931	0.365445	0.368727	0.366088	0.379093	0.361492	0.377263	0.380373	0.400236
2983.88	0.317467	0.343335	0.332807	0.348419	0.358889	0.362227	0.359476	0.372649	0.353957	0.370282	0.373048	0.393336
2985.81	0.311534	0.337342	0.326934	0.342388	0.353033	0.356324	0.353598	0.367025	0.347096	0.363774	0.366549	0.386824
2987.74	0.306095	0.331721	0.32155	0.336882	0.348211	0.35113	0.34815	0.361831	0.341417	0.357992	0.360604	0.380961
2989.66	0.301093	0.327069	0.316795	0.332238	0.343783	0.346571	0.343708	0.357398	0.336145	0.352806	0.355368	0.375892
2991.59	0.29718	0.323447	0.312939	0.328678	0.339941	0.343298	0.340476	0.354292	0.332304	0.348684	0.351483	0.371553
2993.52	0.294821	0.320462	0.310108	0.325925	0.337481	0.340675	0.337636	0.351385	0.32966	0.345575	0.34838	0.368613
2995.45	0.293247	0.318644	0.308037	0.323802	0.335838	0.338379	0.335462	0.349204	0.327284	0.343062	0.346075	0.366748
2997.38	0.292263	0.317578	0.306745	0.322561	0.334696	0.337515	0.334312	0.348279	0.326195	0.341666	0.344842	0.365816
2999.31	0.291816	0.316889	0.306275	0.322212	0.33457	0.337523	0.334292	0.34793	0.326262	0.341545	0.344439	0.36571
3001.24	0.292127	0.317249	0.306384	0.322221	0.335059	0.337578	0.33471	0.348173	0.326634	0.342052	0.344601	0.365794
3003.17	0.292849	0.317963	0.307156	0.322479	0.335944	0.338056	0.33551	0.348912	0.327094	0.342535	0.345166	0.366059
3005.1	0.293602	0.318451	0.307888	0.323182	0.337025	0.338867	0.336207	0.349801	0.327733	0.342865	0.345797	0.366421
3007.02	0.294682	0.319103	0.308376	0.324144	0.338156	0.339823	0.336916	0.35089	0.328836	0.344159	0.346767	0.367292
3008.95	0.295732	0.319888	0.309231	0.324761	0.339306	0.340937	0.338188	0.352013	0.33016	0.345422	0.347845	0.368605
3010.88	0.296326	0.320716	0.310243	0.325455	0.340429	0.342101	0.339243	0.352939	0.331097	0.34582	0.348609	0.369326
3012.81	0.296712	0.321459	0.310822	0.325957	0.341149	0.342851	0.340302	0.353646	0.331286	0.346443	0.349165	0.370224
3014.74	0.29735	0.321946	0.310803	0.326231	0.341925	0.3434	0.341179	0.354304	0.331758	0.347585	0.349529	0.370871
3016.67	0.297853	0.322384	0.311245	0.326725	0.342931	0.344373	0.341923	0.355192	0.332529	0.348254	0.350067	0.371178
3018.6	0.29868	0.323148	0.312092	0.327677	0.344029	0.345733	0.343015	0.356382	0.333296	0.348852	0.351185	0.372457
3020.53	0.300023	0.324165	0.313058	0.328988	0.345817	0.347134	0.344599	0.357984	0.334501	0.350313	0.352319	0.373638
3022.45	0.300907	0.32512	0.313898	0.330093	0.347552	0.348728	0.346248	0.360008	0.335891	0.351431	0.35378	0.374649
3024.38	0.30181	0.326314	0.315046	0.331399	0.349063	0.35045	0.347841	0.361771	0.337541	0.352419	0.355567	0.376521
3026.31	0.30331	0.327733	0.31655	0.332962	0.350976	0.351982	0.34926	0.363019	0.339107	0.354034	0.35683	0.377938
3028.24	0.304764	0.329479	0.318056	0.33456	0.352896	0.354174	0.351091	0.365294	0.340856	0.355982	0.358577	0.37966
3030.17	0.305392	0.331075	0.319797	0.335812	0.35485	0.356348	0.353022	0.367338	0.342802	0.357747	0.360139	0.38185
3032.1	0.306215	0.332261	0.321041	0.336585	0.356652	0.357262	0.353945	0.368068	0.343809	0.359097	0.360956	0.382622
3034.03	0.307987	0.333652	0.322133	0.338197	0.358083	0.358483	0.355582	0.369266	0.345045	0.360597	0.362427	0.383935
3035.96	0.309658	0.33496	0.323464	0.340033	0.359302	0.360575	0.357663	0.371353	0.34686	0.362497	0.364008	0.386027
3037.89	0.311708	0.336637	0.325221	0.34174	0.361418	0.362828	0.359712	0.3735	0.348717	0.364735	0.365879	0.387923
3039.81	0.313491	0.3384	0.326875	0.343529	0.36388	0.365141	0.361726	0.375629	0.350684	0.366516	0.368225	0.389933
3041.74	0.314653	0.340351	0.328256	0.345311	0.36553	0.36721	0.363526	0.377813	0.352792	0.368174	0.37056	0.39216
3043.67	0.316802	0.342739	0.330311	0.347083	0.367485	0.369255	0.365777	0.379507	0.355182	0.370296	0.372404	0.394176
3045.6	0.319245	0.344631	0.332413	0.349242	0.370018	0.371608	0.368115	0.381883	0.357748	0.372901	0.374579	0.39632
3047.53	0.321046	0.346412	0.334155	0.351575	0.372889	0.373853	0.370516	0.384432	0.360328	0.375165	0.377006	0.399201
3049.46	0.322749	0.348433	0.336155	0.353621	0.375435	0.37602	0.372776	0.386328	0.362525	0.376816	0.378892	0.401183
3051.39	0.325347	0.350864	0.338347	0.355943	0.377821	0.378403	0.375193	0.388573	0.364793	0.379167	0.381324	0.402979
3053.32	0.328507	0.353461	0.340698	0.358649	0.380864	0.381186	0.378035	0.391201	0.367665	0.381941	0.384209	0.405914
3055.24	0.331014	0.355765	0.343335	0.36119	0.383981	0.383739	0.380556	0.39407	0.37075	0.38495	0.386787	0.408356
3057.17	0.333297	0.358205	0.345613	0.362894	0.386265	0.385839	0.382805	0.396357	0.373389	0.38735	0.388536	0.410535
3059.1	0.335589	0.360792	0.347628	0.364697	0.388229	0.388245	0.384714	0.39855	0.375714	0.389412	0.390451	0.412868
3061.03	0.337698	0.362755	0.349641	0.366828	0.390568	0.390408	0.386656	0.40084	0.377999	0.391701	0.392861	0.414699
3062.96	0.339323	0.364031	0.351258	0.368591	0.392974	0.392233	0.388907	0.402358	0.379785	0.393617	0.395138	0.416823
3064.89	0.339885	0.364919	0.352375	0.369683	0.394556	0.39366	0.390195	0.403242	0.38075	0.394639	0.396108	0.418376
3066.82	0.340713	0.365697	0.353206	0.370626	0.395717	0.394272	0.390588	0.404027	0.381489	0.395154	0.396619	0.418687
3068.75	0.34227	0.366977	0.35398	0.371573	0.396722	0.395092	0.391536	0.405607	0.38247	0.395942	0.397704	0.419285
3070.68	0.343525	0.368502	0.355308	0.372733	0.397473	0.396747	0.392923	0.407232	0.38374	0.397311	0.398685	0.420706
3072.6	0.344955	0.369741	0.356624	0.37413	0.398661	0.397962	0.39408	0.408237	0.385007	0.398844	0.399942	0.421783
3074.53	0.346365	0.371066	0.357502	0.375042	0.400347	0.399049	0.39501	0.40934	0.385844	0.399701	0.400972	0.422479
3076.46	0.347068	0.372039	0.358346	0.375898	0.401623	0.40027	0.396069	0.410519	0.386491	0.400665	0.402085	0.423754
3078.39	0.347443	0.372428	0.359438	0.376904	0.402493	0.400808	0.397181	0.411212	0.3873	0.401714	0.403134	0.424688
3080.32	0.347969	0.372804	0.359964	0.377702	0.403047	0.400987	0.397723	0.411419	0.387982	0.402314	0.403395	0.425092
3082.25	0.348481	0.373339	0.359923	0.378094	0.402915	0.401523	0.397881	0.411511	0.388209	0.402794	0.403541	0.425794
3084.18	0.349055	0.37408	0.360432	0.378657	0.403219	0.402267	0.398285	0.41177	0.388935	0.403032	0.403825	0.426238
3086.11	0.349515	0.374619	0.36075	0.379359	0.403853	0.402886	0.398792	0.412452	0.390226	0.403541	0.404266	0.426357
3088.03	0.349913	0.375093	0.361059	0.379576	0.404259	0.403266	0.398773	0.413078	0.390809	0.404081	0.404582	0.426831
3089.96	0.350404	0.375382	0.361439	0.379894	0.404414	0.403507	0.39874	0.413232	0.390961	0.404532	0.404601	0.427454
3091.89	0.351022	0.375585	0.361817	0.380121	0.405366	0.403925	0.399525	0.413962	0.391276	0.404638	0.405087	0.428224
3093.82	0.35172	0.376276	0.363031	0.380552	0.407019	0.404928	0.400761	0.415183	0.391883	0.404978	0.406257	0.429098
3095.75	0.351879	0.376614	0.363717	0.3813	0.40719	0.405059	0.400531	0.415228	0.391704	0.405495	0.406457	0.428965
3097.68	0.352629	0.376849	0.363766	0.381736	0.407388	0.404862	0.400436	0.415458	0.391821	0.405841	0.406699	0.429026
3099.61	0.353058	0.377541	0.364153	0.381875	0.408391	0.405705	0.401551	0.415741	0.392805	0.406264	0.407443	0.429677
3101.54	0.352795	0.37819	0.364165	0.38181	0.408787	0.405911	0.401894	0.415187	0.392985	0.406045	0.407645	0.429683
3103.46	0.353307	0.378819	0.364296	0.38239	0.408644	0.406428	0.401988	0.415865	0.393482	0.406819	0.408277	0.430053
3105.39	0.354598	0.37942	0.364944	0.383653	0.408801	0.407521	0.402713	0.417067	0.394249	0.4077	0.409053	0.431058
3107.32	0.355586	0.380131	0.365595	0.384221	0.409352	0.40818	0.403099	0.417354	0.394772	0.408094	0.409657	0.431523
3109.25	0.356142	0.380942	0.366408	0.384991	0.410422	0.408813	0.403352	0.417732	0.395937	0.409342	0.410508	0.432236
3111.18	0.357103	0.381666	0.367622	0.386244	0.411842	0.410028	0.404393	0.418708	0.396955	0.410809	0.411281	0.433401
3113.11	0.358305	0.382868	0.369013	0.387358	0.413279	0.411304	0.406131	0.419876	0.397985	0.411894	0.412259	0.434364
3115.04	0.359412	0.384139	0.37009	0.388522	0.414181	0.411601	0.407408	0.420851	0.399395	0.412777	0.413519	0.435851
3116.97	0.360283	0.385024	0.370852	0.389244	0.415418	0.412338	0.408084	0.421757	0.400545	0.413619	0.41455	0.436788
3118.9	0.36127	0.38612	0.372222	0.390225	0.416339	0.413475	0.409105	0.422586	0.401563	0.414656	0.415769	0.437465
3120.82	0.362588	0.387566	0.373664	0.39157	0.417046	0.414904	0.41062	0.423843	0.40302	0.416369	0.416815	0.439131
3122.75	0.364229	0.38879	0.374593	0.392867	0.418632	0.415961	0.411303	0.425352	0.404591	0.41729	0.417551	0.440057
3124.68	0.366707	0.390407	0.37591	0.394707	0.420315	0.4168	0.412153	0.42699	0.406206	0.418414	0.419099	0.440985
3126.61	0.368155	0.392417	0.377437	0.396262	0.422129	0.418409	0.413571	0.428182	0.407739	0.420381	0.420793	0.442443
3128.54	0.369193	0.394377	0.378877	0.397383	0.42308	0.420043	0.414774	0.42911	0.409045	0.421904	0.42208	0.443845
3130.47	0.371573	0.396724	0.381157	0.399805	0.425342	0.422319	0.417033	0.431412	0.411407	0.424553	0.424536	0.446488
3132.4	0.373446	0.398675	0.383263	0.402172	0.428539	0.424354	0.418857	0.433356	0.413706	0.426844	0.42673	0.448915
3134.33	0.37548	0.400591	0.384757	0.403611	0.430609	0.426043	0.420448	0.434742	0.41545	0.428213	0.428458	0.450581
3136.25	0.377792	0.402288	0.386482	0.405585	0.432248	0.428358	0.422706	0.436612	0.417815	0.430537	0.430529	0.452576
3138.18	0.379635	0.403707	0.388245	0.407554	0.433594	0.430492	0.424224	0.43864	0.420104	0.432202	0.432202	0.454393
3140.11	0.381795	0.4059	0.390051	0.409653	0.435587	0.432295	0.425847	0.440525	0.422093	0.434159	0.434496	0.456184
3142.04	0.384033	0.408223	0.392316	0.411829	0.438425	0.434257	0.428401	0.442215	0.424676	0.436415	0.43637	0.45805
3143.97	0.386436	0.41028	0.394547	0.414136	0.441174	0.436206	0.430688	0.444386	0.426809	0.438483	0.43836	0.460457
3145.9	0.388875	0.41244	0.396719	0.416529	0.443744	0.438476	0.432828	0.44689	0.42936	0.441339	0.441257	0.463934
3147.83	0.391423	0.415356	0.399357	0.418697	0.44624	0.441058	0.434967	0.44933	0.432191	0.444078	0.443646	0.466762
3149.76	0.39441	0.418047	0.401509	0.421079	0.448964	0.44406	0.437144	0.45141	0.434918	0.446519	0.446022	0.468528
3151.69	0.397083	0.420145	0.403372	0.423428	0.451507	0.44665	0.43981	0.453787	0.438125	0.449069	0.448717	0.470844
3153.61	0.399895	0.422933	0.406213	0.426105	0.454526	0.449496	0.442462	0.45666	0.440866	0.451995	0.452093	0.473714
3155.54	0.402931	0.425939	0.409361	0.429052	0.458033	0.452621	0.444737	0.459443	0.444159	0.455486	0.454656	0.476658
3157.47	0.405626	0.428395	0.412164	0.431803	0.460707	0.454824	0.447563	0.462105	0.447278	0.458141	0.456895	0.479245
3159.4	0.408128	0.431046	0.414706	0.434502	0.463431	0.457254	0.450429	0.464286	0.449983	0.460104	0.459861	0.481303
3161.33	0.410833	0.434036	0.417225	0.437008	0.465932	0.460055	0.452853	0.466661	0.452461	0.462794	0.462647	0.483903
3163.26	0.41375	0.436556	0.419803	0.43918	0.468504	0.462918	0.455364	0.469568	0.455047	0.466075	0.465235	0.486573
3165.19	0.416581	0.439228	0.42219	0.44166	0.472144	0.465723	0.457935	0.472251	0.45802	0.469484	0.468195	0.489635
3167.12	0.419489	0.442246	0.424947	0.444613	0.475302	0.468645	0.460599	0.474441	0.460942	0.471997	0.471364	0.492478
3169.04	0.422778	0.445115	0.427951	0.447379	0.477917	0.471178	0.463181	0.476943	0.464489	0.474794	0.473452	0.495024
3170.97	0.425985	0.448095	0.430566	0.450417	0.480975	0.473963	0.466164	0.48002	0.467856	0.477994	0.475849	0.498271
3172.9	0.428755	0.451333	0.433755	0.45389	0.484302	0.477248	0.469551	0.482718	0.470738	0.481183	0.478907	0.50119
3174.83	0.431931	0.454486	0.436992	0.457107	0.488187	0.479639	0.4723	0.485609	0.473868	0.484757	0.481881	0.504167
3176.76	0.434858	0.457201	0.43962	0.460134	0.492305	0.482551	0.475206	0.488961	0.476807	0.488163	0.485205	0.507034
3178.69	0.437071	0.459821	0.442274	0.4625	0.494642	0.485596	0.477389	0.491339	0.479569	0.490179	0.487755	0.509381
3180.62	0.440093	0.462819	0.44481	0.464818	0.496189	0.487912	0.479437	0.49331	0.482572	0.492233	0.490057	0.51182
3182.55	0.443346	0.465812	0.447505	0.467512	0.499127	0.490859	0.482534	0.49579	0.485739	0.495199	0.493194	0.515104
3184.48	0.445786	0.468541	0.449896	0.470355	0.502606	0.493569	0.485031	0.498307	0.488738	0.497866	0.495924	0.517739
3186.4	0.448576	0.471269	0.452275	0.473021	0.505067	0.495725	0.487325	0.500888	0.49155	0.500113	0.498205	0.519481
3188.33	0.451829	0.473992	0.455008	0.475632	0.507301	0.499106	0.490094	0.503349	0.494966	0.504143	0.5012	0.52239
3190.26	0.455183	0.4769	0.458198	0.478693	0.510689	0.502998	0.492486	0.505851	0.498001	0.508074	0.504733	0.525615
3192.19	0.458404	0.480097	0.461404	0.481952	0.514312	0.505449	0.494635	0.508662	0.501241	0.509927	0.507591	0.529068
3194.12	0.461069	0.483049	0.464136	0.484598	0.517306	0.507877	0.497415	0.511729	0.504692	0.512807	0.509504	0.53222
3196.05	0.464436	0.485977	0.467166	0.487018	0.519996	0.511116	0.500369	0.514526	0.507254	0.515879	0.511846	0.534858
3197.98	0.467049	0.488316	0.469539	0.489198	0.522087	0.513316	0.502181	0.51598	0.509258	0.517646	0.514529	0.536053
3199.91	0.468723	0.490167	0.471362	0.491385	0.524053	0.514974	0.504168	0.517781	0.511834	0.520129	0.51719	0.537826
3201.83	0.471537	0.492676	0.47346	0.493827	0.526922	0.517038	0.506866	0.520328	0.514372	0.523029	0.519383	0.541035
3203.76	0.474194	0.495321	0.47562	0.496259	0.529848	0.518796	0.508976	0.522948	0.516646	0.525759	0.52146	0.543582
3205.69	0.476985	0.497448	0.477972	0.49904	0.532155	0.520962	0.510726	0.525278	0.518784	0.528499	0.524007	0.545106
3207.62	0.479963	0.500244	0.480735	0.50171	0.534792	0.523906	0.513042	0.527477	0.521742	0.53099	0.527011	0.547304
3209.55	0.48223	0.502909	0.483066	0.503813	0.537386	0.526246	0.515347	0.529228	0.524095	0.533018	0.52935	0.549751
3211.48	0.485476	0.505693	0.485792	0.506447	0.539634	0.528779	0.517738	0.531185	0.526251	0.535815	0.531604	0.552275
3213.41	0.48768	0.508655	0.488761	0.509314	0.542302	0.530619	0.520226	0.533314	0.529206	0.538758	0.534629	0.555732
3215.34	0.489171	0.5106	0.490644	0.511279	0.544209	0.53249	0.521639	0.534156	0.531072	0.540676	0.536165	0.557793
3217.27	0.492315	0.513051	0.493295	0.513743	0.546919	0.535368	0.523567	0.536828	0.53416	0.5434	0.538073	0.560179
3219.19	0.494752	0.515179	0.495692	0.515605	0.549618	0.537278	0.525568	0.539322	0.536623	0.544921	0.540478	0.561942
3221.12	0.497206	0.516978	0.497402	0.51769	0.551028	0.538571	0.526988	0.540788	0.538452	0.546551	0.542276	0.562603
3223.05	0.500149	0.519917	0.499842	0.520519	0.553027	0.54024	0.528553	0.542968	0.540634	0.54923	0.544663	0.564328
3224.98	0.502443	0.522752	0.50266	0.523038	0.555712	0.54261	0.530186	0.544604	0.543781	0.551276	0.547302	0.566777
3226.91	0.505426	0.525206	0.505036	0.525583	0.558578	0.545247	0.532952	0.546583	0.547142	0.553664	0.549502	0.569661
3228.84	0.507828	0.528482	0.507721	0.528412	0.560729	0.547558	0.535666	0.548803	0.549132	0.556317	0.551424	0.572666
3230.77	0.509893	0.531659	0.510713	0.531408	0.562514	0.550091	0.537817	0.551662	0.551179	0.55957	0.553859	0.575459
3232.7	0.512837	0.53367	0.512895	0.533475	0.565079	0.552582	0.539975	0.553972	0.554419	0.562591	0.557165	0.578205
3234.62	0.516474	0.536511	0.515737	0.535832	0.56882	0.55546	0.542625	0.556035	0.557923	0.565371	0.56093	0.58102
3236.55	0.520189	0.539931	0.518892	0.538898	0.57227	0.558429	0.545395	0.558576	0.56021	0.568331	0.562926	0.583224
3238.48	0.522922	0.543155	0.521805	0.541653	0.575059	0.561479	0.548127	0.561518	0.563549	0.571551	0.565104	0.585776
3240.41	0.525692	0.546512	0.52469	0.544489	0.577974	0.564326	0.550941	0.564216	0.567239	0.574657	0.568856	0.588781
3242.34	0.529592	0.550413	0.528584	0.548374	0.581728	0.5672	0.554066	0.567774	0.570991	0.578496	0.57285	0.592131
3244.27	0.532961	0.55442	0.532739	0.552355	0.585213	0.570899	0.557068	0.571317	0.575377	0.582935	0.576107	0.595978
3246.2	0.536729	0.557442	0.535587	0.556227	0.587807	0.573885	0.559635	0.573108	0.579003	0.586217	0.578358	0.599429
3248.13	0.541927	0.561554	0.539057	0.561021	0.592142	0.577954	0.564144	0.57701	0.582864	0.59025	0.583237	0.603751
3250.05	0.546887	0.566286	0.544056	0.565493	0.596857	0.583404	0.568417	0.582059	0.587598	0.594695	0.588531	0.608158
3251.98	0.552053	0.571078	0.549735	0.570085	0.602122	0.58816	0.572731	0.586547	0.593231	0.599662	0.593873	0.612656
3253.91	0.556641	0.575601	0.554458	0.5739	0.607839	0.591618	0.576575	0.58969	0.597778	0.603899	0.597768	0.616836
3255.84	0.560689	0.580047	0.558339	0.577679	0.612334	0.595812	0.579825	0.593204	0.601888	0.608228	0.600598	0.62099
3257.77	0.565775	0.584605	0.562431	0.582166	0.616363	0.600438	0.583993	0.597171	0.606671	0.613391	0.604914	0.625254
3259.7	0.571054	0.589083	0.566972	0.586164	0.620312	0.604577	0.588359	0.601135	0.611232	0.618007	0.609469	0.629075
3261.63	0.575756	0.594003	0.571021	0.590293	0.624167	0.608777	0.593018	0.606165	0.615202	0.622247	0.61511	0.63353
3263.56	0.580056	0.598542	0.574741	0.595086	0.628505	0.612926	0.597029	0.609953	0.619637	0.626617	0.619615	0.637963
3265.49	0.584572	0.603144	0.579512	0.600153	0.633162	0.616864	0.600713	0.613466	0.624718	0.631375	0.623467	0.642227
3267.41	0.589054	0.607283	0.584567	0.604407	0.637372	0.620476	0.6043	0.6177	0.629209	0.634895	0.628205	0.646258
3269.34	0.592697	0.611303	0.588536	0.609156	0.641238	0.623984	0.607788	0.621337	0.634124	0.639487	0.632388	0.650645
3271.27	0.596134	0.61506	0.591875	0.61296	0.644773	0.627899	0.611076	0.624882	0.638096	0.643735	0.636028	0.654868
3273.2	0.598648	0.617676	0.59492	0.614566	0.647366	0.631089	0.613555	0.627452	0.640364	0.645856	0.638978	0.657377
3275.13	0.601246	0.619943	0.597531	0.616645	0.649168	0.63332	0.616535	0.628751	0.642521	0.648691	0.640971	0.658877
3277.06	0.604367	0.622578	0.599409	0.619186	0.650817	0.635386	0.617903	0.630142	0.644479	0.651033	0.642725	0.660433
3278.99	0.606211	0.624081	0.600439	0.620315	0.652936	0.636465	0.618217	0.631827	0.646704	0.651617	0.644104	0.662347
3280.92	0.606745	0.62511	0.601643	0.622084	0.654668	0.637444	0.619561	0.633252	0.648747	0.653141	0.644675	0.663935
3282.84	0.607411	0.626798	0.602791	0.623223	0.654473	0.637673	0.620186	0.633576	0.64893	0.65398	0.645538	0.664287
3284.77	0.607644	0.626564	0.60306	0.623146	0.654232	0.637685	0.620064	0.633375	0.648278	0.653898	0.646804	0.665585
3286.7	0.607918	0.627003	0.602862	0.623582	0.654749	0.63839	0.620223	0.63384	0.648736	0.655388	0.647586	0.666587
3288.63	0.608312	0.627786	0.602643	0.623264	0.653754	0.638424	0.619802	0.633431	0.648166	0.655609	0.647591	0.665103
3290.56	0.607549	0.627309	0.602393	0.62307	0.653357	0.6379	0.619117	0.632184	0.646508	0.654897	0.647365	0.664649
3292.49	0.605302	0.626142	0.601504	0.621814	0.65174	0.635693	0.617693	0.630651	0.645605	0.653398	0.645904	0.664137
3294.42	0.603953	0.624476	0.600232	0.620732	0.648501	0.633476	0.616105	0.629153	0.644396	0.651824	0.643652	0.662809
3296.35	0.603592	0.622108	0.598578	0.62006	0.647749	0.631758	0.614774	0.62797	0.642653	0.650466	0.641862	0.661079
3298.28	0.601459	0.619628	0.59645	0.617646	0.645752	0.628958	0.61182	0.62599	0.640075	0.648075	0.639463	0.658865
3300.2	0.599209	0.617943	0.594473	0.615153	0.642511	0.626617	0.609628	0.623661	0.637619	0.645751	0.637147	0.656151
3302.13	0.59649	0.615624	0.592232	0.613363	0.639846	0.624773	0.608372	0.621262	0.635183	0.643506	0.635603	0.65341
3304.06	0.593225	0.613297	0.589889	0.611542	0.636791	0.622339	0.605531	0.61853	0.633213	0.640652	0.633953	0.651154
3305.99	0.591287	0.610819	0.587409	0.609567	0.634245	0.619888	0.602688	0.615868	0.631613	0.637737	0.631893	0.64902
3307.92	0.58919	0.608319	0.585224	0.606719	0.631354	0.617254	0.599941	0.613082	0.628534	0.63495	0.629409	0.646439
3309.85	0.586101	0.605526	0.582431	0.603315	0.628342	0.61386	0.596253	0.610384	0.624561	0.632134	0.626215	0.64336
3311.78	0.583625	0.602693	0.579405	0.600614	0.625939	0.61108	0.593461	0.608949	0.621259	0.629715	0.623311	0.641308
3313.71	0.580386	0.599906	0.57623	0.597132	0.62293	0.60666	0.590054	0.605114	0.618252	0.626543	0.619329	0.638075
3315.63	0.576793	0.597259	0.57321	0.594151	0.619674	0.602412	0.587018	0.60068	0.615205	0.623548	0.616224	0.634755
3317.56	0.57371	0.593929	0.570813	0.591157	0.614596	0.600258	0.584334	0.597843	0.61138	0.620219	0.614246	0.631418
3319.49	0.570449	0.589917	0.567629	0.587779	0.610592	0.597548	0.580718	0.594987	0.606761	0.615515	0.610339	0.627728
3321.42	0.566994	0.586933	0.564519	0.584827	0.608197	0.594554	0.577188	0.592175	0.603287	0.611958	0.606744	0.624401
3323.35	0.56363	0.583944	0.561718	0.582111	0.604754	0.591377	0.57368	0.588943	0.601227	0.609356	0.603743	0.621351
3325.28	0.560959	0.581053	0.558804	0.579944	0.601878	0.588166	0.570141	0.585725	0.598152	0.606147	0.60016	0.619212
3327.21	0.557184	0.578245	0.555864	0.577446	0.598292	0.583852	0.567203	0.582134	0.594954	0.603125	0.59734	0.61557
3329.14	0.553575	0.575299	0.553109	0.574661	0.594555	0.580303	0.564656	0.578769	0.592381	0.600531	0.594191	0.612328
3331.07	0.551315	0.572357	0.550343	0.57186	0.591575	0.578356	0.561937	0.576961	0.58972	0.597363	0.590798	0.610315
3332.99	0.548684	0.569995	0.547427	0.569613	0.588499	0.575326	0.55885	0.574512	0.58734	0.594193	0.588596	0.607525
3334.92	0.545405	0.567394	0.544193	0.566806	0.586088	0.572684	0.556164	0.570766	0.584151	0.591434	0.586029	0.604797
3336.85	0.541249	0.563348	0.539845	0.562062	0.582196	0.569528	0.55304	0.567208	0.579961	0.587093	0.582164	0.601364
3338.78	0.537653	0.559491	0.536693	0.558896	0.577908	0.56565	0.54949	0.563957	0.576489	0.583095	0.578425	0.597777
3340.71	0.534935	0.556747	0.533803	0.556653	0.574788	0.562584	0.545881	0.56101	0.573653	0.580669	0.575351	0.594759
3342.64	0.532553	0.553788	0.53124	0.552729	0.571899	0.559543	0.542248	0.557311	0.570283	0.576986	0.572617	0.591324
3344.57	0.530047	0.550801	0.528881	0.55016	0.569296	0.55646	0.539673	0.554597	0.567679	0.574208	0.569473	0.588117
3346.5	0.52691	0.54861	0.525184	0.548432	0.566832	0.553405	0.536969	0.552317	0.564522	0.571949	0.566161	0.585683
3348.42	0.524106	0.545694	0.522202	0.545874	0.564173	0.550818	0.533774	0.549512	0.560948	0.56907	0.563646	0.582546
3350.35	0.521463	0.542882	0.519922	0.542815	0.560468	0.548219	0.530556	0.546987	0.558268	0.56702	0.561115	0.579141
3352.28	0.518815	0.54055	0.517797	0.539778	0.558012	0.544996	0.528463	0.543838	0.555542	0.564098	0.557685	0.576343
3354.21	0.515901	0.537842	0.515314	0.536551	0.556216	0.542124	0.526816	0.540528	0.552976	0.560529	0.554388	0.574379
3356.14	0.512119	0.534188	0.51197	0.532829	0.552564	0.538516	0.523217	0.536301	0.549124	0.556043	0.550996	0.57033
3358.07	0.509175	0.530617	0.508636	0.529951	0.54872	0.534839	0.519064	0.533326	0.545198	0.552066	0.547159	0.566133
3360	0.506211	0.527659	0.505578	0.527041	0.54566	0.531579	0.515485	0.530512	0.541814	0.550065	0.543833	0.563483
3361.93	0.502271	0.52446	0.502729	0.523291	0.542662	0.52799	0.511929	0.526553	0.537161	0.546533	0.540231	0.559051
3363.86	0.498783	0.521646	0.500117	0.520318	0.539241	0.525136	0.508142	0.523703	0.533344	0.542362	0.537291	0.555493
3365.78	0.495636	0.51819	0.497151	0.517528	0.535869	0.52138	0.504975	0.519743	0.530619	0.53912	0.534412	0.552608
3367.71	0.492563	0.514938	0.493444	0.514405	0.532787	0.517681	0.5021	0.51566	0.52814	0.535836	0.530188	0.549256
3369.64	0.489687	0.512255	0.49043	0.511501	0.529077	0.514938	0.498532	0.5129	0.524816	0.53284	0.526582	0.546474
3371.57	0.486793	0.50951	0.487596	0.508629	0.525902	0.512347	0.49601	0.510868	0.521538	0.529456	0.524158	0.543418
3373.5	0.48405	0.506532	0.484394	0.506071	0.523194	0.509374	0.493622	0.50885	0.518791	0.526204	0.521071	0.540021
3375.43	0.481652	0.50355	0.480992	0.503587	0.519871	0.506131	0.490613	0.505868	0.514726	0.522716	0.517308	0.536927
3377.36	0.478717	0.50062	0.4781	0.500125	0.516398	0.503411	0.487478	0.502531	0.510879	0.519151	0.514028	0.533871
3379.29	0.47564	0.49745	0.47536	0.49686	0.513205	0.499652	0.483874	0.498946	0.507735	0.516509	0.511052	0.53012
3381.21	0.473196	0.494406	0.471675	0.49453	0.510634	0.496585	0.481209	0.495778	0.504943	0.513065	0.508471	0.526801
3383.14	0.470526	0.491827	0.46958	0.491952	0.508573	0.494216	0.478812	0.493495	0.502751	0.509548	0.50582	0.524356
3385.07	0.467261	0.489232	0.467461	0.48881	0.505429	0.490782	0.47546	0.490007	0.499348	0.506208	0.501757	0.520507
3387	0.464793	0.486435	0.464809	0.485885	0.502232	0.488034	0.472324	0.48634	0.496287	0.503274	0.498275	0.516814
3388.93	0.462532	0.484008	0.462292	0.483805	0.500404	0.485547	0.470078	0.48475	0.494201	0.501512	0.495925	0.514561
3390.86	0.460587	0.482301	0.460349	0.482112	0.499352	0.483685	0.468837	0.483512	0.49168	0.500006	0.493985	0.513165
3392.79	0.456775	0.478629	0.45716	0.478429	0.496211	0.479761	0.465346	0.47939	0.487253	0.49562	0.490265	0.509543
3394.72	0.453332	0.475205	0.45391	0.475736	0.492604	0.476578	0.462204	0.476037	0.484241	0.491949	0.487403	0.505864
3396.64	0.451646	0.472894	0.451696	0.473388	0.489538	0.474484	0.459095	0.474156	0.481909	0.489673	0.484702	0.502609
3398.57	0.448421	0.469607	0.448293	0.469731	0.484996	0.470975	0.454763	0.470715	0.477316	0.485849	0.480078	0.498414
3400.5	0.445746	0.467081	0.445531	0.466794	0.482597	0.468566	0.451845	0.467168	0.474455	0.483615	0.477808	0.495775
3402.43	0.442913	0.46405	0.442946	0.463999	0.480007	0.465357	0.448981	0.46454	0.471327	0.480561	0.474994	0.492902
3404.36	0.439193	0.461133	0.439879	0.461191	0.476286	0.462044	0.446302	0.461458	0.467685	0.476414	0.471201	0.489588
3406.29	0.43625	0.458428	0.437095	0.458112	0.473259	0.458869	0.44373	0.457778	0.464856	0.473728	0.468035	0.48654
3408.22	0.433473	0.45558	0.43407	0.454831	0.4706	0.456052	0.44147	0.455026	0.461455	0.470634	0.464901	0.482593
3410.15	0.43073	0.452724	0.43107	0.451661	0.467588	0.45355	0.438254	0.451968	0.458339	0.466966	0.461149	0.479088
3412.08	0.427678	0.449824	0.428314	0.44904	0.464059	0.450461	0.434628	0.44866	0.455458	0.463536	0.458221	0.476915
3414	0.424315	0.446754	0.424742	0.445932	0.461343	0.447149	0.431422	0.445515	0.452082	0.459841	0.455543	0.473828
3415.93	0.421007	0.443391	0.421432	0.442768	0.45848	0.444261	0.428239	0.4421	0.448907	0.456478	0.451469	0.470375
3417.86	0.418397	0.440857	0.419536	0.440244	0.456117	0.442055	0.426309	0.439173	0.446084	0.454058	0.449187	0.468118
3419.79	0.414614	0.437477	0.416788	0.43664	0.453145	0.438758	0.423241	0.43519	0.442501	0.45071	0.446187	0.464868
3421.72	0.409654	0.432301	0.411993	0.431507	0.448433	0.433697	0.417577	0.429805	0.438235	0.444836	0.439986	0.459214
3423.65	0.406478	0.428974	0.40787	0.42767	0.444058	0.429538	0.413392	0.426577	0.434261	0.440417	0.435825	0.455339
3425.58	0.403755	0.426197	0.404516	0.425223	0.440689	0.426945	0.410663	0.4246	0.430316	0.438141	0.432928	0.452661
3427.51	0.400474	0.422654	0.401066	0.42217	0.43718	0.424127	0.40767	0.421199	0.426806	0.435055	0.429	0.449208
3429.43	0.397391	0.419441	0.397744	0.418592	0.43376	0.420448	0.40396	0.417542	0.42361	0.431172	0.425712	0.4457
3431.36	0.394081	0.415576	0.394535	0.415114	0.430191	0.416236	0.399853	0.414711	0.419181	0.427285	0.422208	0.441403
3433.29	0.389918	0.411948	0.391153	0.411322	0.425831	0.412301	0.396344	0.410926	0.414568	0.423635	0.418195	0.436594
3435.22	0.38638	0.408675	0.387564	0.407957	0.422479	0.40894	0.393495	0.407329	0.411419	0.420396	0.414976	0.433182
3437.15	0.383021	0.404549	0.384416	0.404189	0.419302	0.405205	0.389907	0.403517	0.408004	0.416008	0.411044	0.430202
3439.08	0.379755	0.40098	0.381301	0.400002	0.415993	0.401885	0.385927	0.400407	0.404305	0.412332	0.40748	0.426554
3441.01	0.375724	0.397737	0.378189	0.396803	0.413583	0.398847	0.383633	0.398001	0.400668	0.409395	0.40474	0.423173
3442.94	0.370856	0.393291	0.37417	0.392859	0.409138	0.394509	0.379612	0.393153	0.395786	0.40505	0.399553	0.419117
3444.87	0.368391	0.390764	0.371892	0.390382	0.406731	0.39221	0.377278	0.390122	0.393149	0.402697	0.396291	0.416399
3446.79	0.363653	0.386424	0.367859	0.385747	0.403347	0.387108	0.372681	0.384815	0.388582	0.397102	0.391646	0.411028
3448.72	0.35859	0.381033	0.36119	0.380253	0.396144	0.381003	0.365286	0.378588	0.381854	0.390575	0.385028	0.404469
3450.65	0.356241	0.378511	0.357892	0.377704	0.392067	0.378663	0.3626	0.376449	0.378919	0.388204	0.382387	0.401828
3452.58	0.352142	0.374756	0.354431	0.373983	0.38853	0.375222	0.359538	0.372921	0.37538	0.384617	0.379432	0.398094
3454.51	0.34799	0.370774	0.350426	0.370008	0.384927	0.371549	0.356165	0.369091	0.371034	0.38033	0.375313	0.393966
3456.44	0.344767	0.366839	0.346728	0.365661	0.381099	0.368044	0.352171	0.365261	0.367103	0.375643	0.370952	0.39014
3458.37	0.341083	0.362924	0.34317	0.36205	0.377824	0.36429	0.34871	0.36128	0.363123	0.371816	0.367457	0.38643
3460.3	0.336537	0.359499	0.339939	0.358499	0.374939	0.360777	0.345927	0.358022	0.358975	0.368377	0.364304	0.382447
3462.22	0.331907	0.354774	0.335775	0.353588	0.369968	0.356256	0.34049	0.353378	0.354427	0.363757	0.359017	0.377134
3464.15	0.328508	0.350503	0.33155	0.349766	0.364876	0.35193	0.336082	0.348677	0.350374	0.35957	0.353541	0.372871
3466.08	0.324968	0.347365	0.328053	0.346068	0.361517	0.348405	0.333283	0.34588	0.346375	0.355465	0.34936	0.369569
3468.01	0.320847	0.343339	0.323869	0.341671	0.357157	0.344042	0.328774	0.342153	0.341648	0.351154	0.34479	0.365385
3469.94	0.317089	0.339151	0.319381	0.337938	0.352736	0.340115	0.324335	0.338123	0.337445	0.347413	0.34083	0.361556
3471.87	0.312874	0.335301	0.315729	0.334289	0.349348	0.33604	0.320583	0.333884	0.333162	0.343575	0.33765	0.357732
3473.8	0.308878	0.331631	0.312378	0.330701	0.345511	0.332378	0.317467	0.329613	0.328798	0.339125	0.334583	0.353357
3475.73	0.304288	0.327359	0.307925	0.326045	0.340933	0.327992	0.312636	0.325349	0.32435	0.333886	0.329463	0.34875
3477.66	0.300332	0.323529	0.304452	0.322424	0.337401	0.324379	0.309251	0.322152	0.321439	0.330857	0.325089	0.345606
3479.58	0.297005	0.32035	0.302583	0.319604	0.335053	0.321857	0.307585	0.319194	0.318965	0.328638	0.322754	0.34298
3481.51	0.291868	0.31546	0.298447	0.314781	0.331367	0.316894	0.302622	0.314211	0.313584	0.323539	0.317844	0.338036
3483.44	0.287001	0.310163	0.292784	0.309723	0.325697	0.311469	0.296712	0.309915	0.307802	0.317391	0.312187	0.332366
3485.37	0.284101	0.307254	0.289559	0.306383	0.322428	0.309085	0.294033	0.3072	0.304939	0.314727	0.309431	0.3283
3487.3	0.280169	0.303553	0.285766	0.30194	0.31871	0.305446	0.290684	0.302451	0.300882	0.311098	0.305141	0.323913
3489.23	0.276228	0.298931	0.280942	0.297493	0.312887	0.300596	0.285838	0.297177	0.295606	0.305407	0.30041	0.319496
3491.16	0.272843	0.295015	0.276834	0.294362	0.309017	0.297115	0.28195	0.294023	0.291494	0.301544	0.296827	0.316112
3493.09	0.269148	0.291738	0.273395	0.291097	0.305894	0.293519	0.278369	0.291136	0.288103	0.298285	0.293392	0.31252
3495.01	0.265704	0.288165	0.270276	0.287347	0.302947	0.290012	0.274606	0.287165	0.284426	0.294577	0.289885	0.308468
3496.94	0.261174	0.283611	0.266083	0.282776	0.298943	0.285793	0.269925	0.283002	0.279425	0.290078	0.285086	0.304249
3498.87	0.257274	0.28027	0.263334	0.279482	0.295723	0.282459	0.267284	0.28003	0.276179	0.28699	0.281453	0.301372
3500.8	0.254529	0.277556	0.262747	0.276767	0.295535	0.280676	0.266253	0.278313	0.274496	0.284664	0.27934	0.299287
3502.73	0.248596	0.272581	0.25887	0.271372	0.291823	0.275664	0.261267	0.273552	0.269775	0.279228	0.274377	0.29424
3504.66	0.24294	0.267106	0.251626	0.265709	0.283459	0.268704	0.254314	0.266974	0.262318	0.272756	0.26734	0.287892
3506.59	0.241118	0.264577	0.247726	0.263191	0.279434	0.266356	0.25201	0.264593	0.259391	0.270327	0.264757	0.284751
3508.52	0.237859	0.261192	0.245534	0.26021	0.277649	0.263723	0.249686	0.261737	0.25659	0.267656	0.262206	0.281846
3510.45	0.232683	0.255764	0.240358	0.254591	0.271844	0.258005	0.243627	0.255842	0.24968	0.261512	0.256207	0.276423
3512.37	0.229358	0.251911	0.235371	0.250586	0.266132	0.254007	0.239322	0.251406	0.245301	0.25678	0.251771	0.272173
3514.3	0.22646	0.248335	0.231361	0.247322	0.262114	0.250541	0.23604	0.24811	0.241738	0.253191	0.248434	0.268241
3516.23	0.222803	0.244883	0.227704	0.243734	0.258704	0.247169	0.232985	0.245003	0.238257	0.250469	0.245543	0.264188
3518.16	0.21842	0.241216	0.224619	0.23999	0.255503	0.24354	0.228936	0.241292	0.234706	0.24707	0.241922	0.260267
3520.09	0.214797	0.237897	0.222086	0.23713	0.253257	0.240853	0.225733	0.238695	0.231648	0.24345	0.238678	0.257851
3522.02	0.211049	0.234783	0.221146	0.234888	0.253446	0.239157	0.2246	0.236795	0.229432	0.241045	0.236383	0.256296
3523.95	0.206011	0.230464	0.218521	0.230419	0.250847	0.234976	0.220643	0.231747	0.224612	0.236693	0.231061	0.251362
3525.88	0.202465	0.227036	0.214715	0.226582	0.246208	0.230995	0.217092	0.227403	0.220724	0.232653	0.226955	0.246808
3527.8	0.198305	0.222836	0.210163	0.222362	0.240737	0.225732	0.212079	0.223063	0.215626	0.227563	0.222706	0.24245
3529.73	0.194128	0.217866	0.204224	0.217419	0.233807	0.220102	0.206118	0.218042	0.209681	0.222191	0.21743	0.237504
3531.66	0.191097	0.214182	0.198936	0.212958	0.228203	0.215855	0.201798	0.214179	0.205502	0.218203	0.213663	0.233449
3533.59	0.188359	0.21148	0.19547	0.210146	0.224948	0.212957	0.199184	0.211566	0.202838	0.215977	0.210898	0.230407
3535.52	0.184606	0.207666	0.193361	0.207205	0.222407	0.210047	0.196174	0.20836	0.199782	0.212444	0.207419	0.227137
3537.45	0.180175	0.202863	0.188585	0.202059	0.21708	0.20512	0.190724	0.203189	0.194351	0.206267	0.201933	0.222169
3539.38	0.177093	0.199593	0.183923	0.198655	0.212633	0.201845	0.187278	0.199779	0.190225	0.202715	0.19807	0.218641
3541.31	0.174131	0.197065	0.181719	0.196502	0.211134	0.199837	0.185764	0.197718	0.18805	0.20069	0.195608	0.216354
3543.23	0.170301	0.194526	0.181824	0.194248	0.211246	0.198129	0.185266	0.195678	0.186391	0.199034	0.194141	0.2145
3545.16	0.165334	0.190462	0.180637	0.190465	0.209149	0.194357	0.181362	0.190952	0.182335	0.195284	0.190245	0.210088
3547.09	0.159965	0.184778	0.174265	0.184905	0.202133	0.187941	0.174079	0.18506	0.175557	0.18871	0.183162	0.203918
3549.02	0.157151	0.181361	0.168771	0.181299	0.195996	0.183505	0.170183	0.181958	0.171	0.184492	0.179455	0.200506
3550.95	0.154256	0.178832	0.166347	0.178687	0.193288	0.181073	0.168815	0.179784	0.168367	0.18229	0.177913	0.198048
3552.88	0.14906	0.173987	0.162283	0.173525	0.188182	0.175717	0.163488	0.174644	0.162746	0.177187	0.172675	0.192668
3554.81	0.146344	0.169728	0.15651	0.169327	0.181839	0.171218	0.158079	0.170041	0.158038	0.172436	0.167917	0.187741
3556.74	0.143398	0.166693	0.152468	0.166546	0.17816	0.168515	0.155433	0.167078	0.154972	0.169002	0.164631	0.184921
3558.67	0.13979	0.163949	0.150581	0.163837	0.176581	0.166079	0.152827	0.164194	0.152259	0.165794	0.161595	0.182273
3560.59	0.135933	0.160465	0.148647	0.160869	0.175185	0.163586	0.149921	0.161563	0.149046	0.162857	0.158695	0.179291
3562.52	0.13197	0.157402	0.147056	0.158455	0.174053	0.161047	0.147777	0.159713	0.146178	0.160621	0.156184	0.177121
3564.45	0.129029	0.156153	0.148816	0.157822	0.176122	0.160627	0.14811	0.159243	0.146019	0.160028	0.155873	0.176047
3566.38	0.122346	0.151931	0.148542	0.153435	0.175186	0.156348	0.144909	0.154079	0.141977	0.154852	0.151907	0.171559
3568.31	0.116196	0.144259	0.138653	0.145478	0.162296	0.146167	0.134055	0.144276	0.131845	0.145541	0.142133	0.163219
3570.24	0.115453	0.140819	0.130268	0.142009	0.153011	0.141819	0.129495	0.141036	0.127112	0.141939	0.137772	0.159363
3572.17	0.113583	0.138455	0.12567	0.139104	0.148981	0.139264	0.127479	0.138812	0.124372	0.139379	0.135373	0.156711
3574.1	0.110161	0.135213	0.12294	0.13597	0.14604	0.135979	0.124543	0.135287	0.121046	0.136229	0.13218	0.153521
3576.02	0.10692	0.131749	0.119958	0.132641	0.142169	0.132417	0.120694	0.131772	0.117581	0.132472	0.128547	0.149922
3577.95	0.103635	0.128662	0.116936	0.129512	0.138633	0.129131	0.117211	0.128873	0.114069	0.129127	0.125563	0.146554
3579.88	0.100126	0.12542	0.113686	0.126581	0.135018	0.126356	0.113695	0.125577	0.110353	0.125742	0.122819	0.143152
3581.81	0.096881	0.122599	0.110835	0.124071	0.131985	0.123868	0.11044	0.122978	0.107346	0.122856	0.1202	0.140261
3583.74	0.093926	0.121135	0.110429	0.122782	0.131838	0.12231	0.109476	0.121436	0.105586	0.121531	0.118847	0.138958
3585.67	0.090757	0.119413	0.112151	0.121446	0.134594	0.121792	0.109736	0.120159	0.104919	0.120868	0.118038	0.137556
3587.6	0.084686	0.113811	0.109388	0.116323	0.131526	0.116041	0.104353	0.115256	0.099128	0.115602	0.112555	0.132916
3589.53	0.081634	0.109395	0.101349	0.111224	0.12108	0.10963	0.097329	0.109604	0.092403	0.109456	0.105967	0.127681
3591.46	0.080981	0.107694	0.097655	0.109927	0.116811	0.108098	0.096056	0.107779	0.090889	0.107572	0.104494	0.1252
3593.38	0.077289	0.104897	0.096597	0.10808	0.116004	0.10591	0.09481	0.105412	0.08894	0.105524	0.102836	0.123279
3595.31	0.07316	0.101574	0.094284	0.104449	0.113603	0.101944	0.090653	0.102115	0.085059	0.101945	0.098817	0.120424
3597.24	0.070514	0.099071	0.091227	0.101428	0.109852	0.099052	0.087259	0.099393	0.081356	0.098702	0.095723	0.117413
3599.17	0.0674	0.096295	0.088298	0.09913	0.105895	0.096545	0.084715	0.096521	0.078119	0.095854	0.093569	0.114525
3601.1	0.06429	0.092841	0.084399	0.096196	0.101055	0.092542	0.080438	0.092952	0.074304	0.092083	0.089983	0.111051
3603.03	0.062617	0.090248	0.08064	0.093287	0.096655	0.089521	0.076691	0.090128	0.071043	0.088891	0.086758	0.108509
3604.96	0.060813	0.088731	0.079127	0.091824	0.095489	0.08814	0.075745	0.088298	0.069306	0.08764	0.085565	0.106349
3606.89	0.05726	0.086769	0.080129	0.090586	0.096908	0.086458	0.075696	0.087012	0.068208	0.086642	0.084106	0.104598
3608.81	0.05332	0.08351	0.07875	0.087302	0.095276	0.083238	0.07211	0.084821	0.065124	0.082883	0.080258	0.103126
3610.74	0.051109	0.081487	0.075964	0.084831	0.092564	0.080993	0.069874	0.08208	0.062589	0.080083	0.07781	0.099733
3612.67	0.047651	0.079147	0.075558	0.0831	0.092374	0.078975	0.068818	0.07983	0.060956	0.078459	0.076453	0.097362
3614.6	0.044636	0.076402	0.073355	0.080267	0.089209	0.075617	0.064861	0.076679	0.057455	0.075576	0.07358	0.095707
3616.53	0.043297	0.074853	0.070578	0.078489	0.085717	0.073525	0.063356	0.074351	0.055099	0.074033	0.0718	0.093103
3618.46	0.0397	0.071705	0.068639	0.075836	0.08359	0.070358	0.061497	0.071421	0.052712	0.071553	0.069783	0.09038
3620.39	0.037039	0.068423	0.064116	0.072499	0.076914	0.065766	0.055457	0.067664	0.04793	0.066482	0.065748	0.087148
3622.32	0.037054	0.066755	0.059073	0.070732	0.070248	0.063189	0.051565	0.064929	0.044184	0.063314	0.062691	0.083636
3624.25	0.036221	0.065553	0.057351	0.06941	0.068645	0.062187	0.050315	0.06383	0.042691	0.062051	0.061395	0.082162
3626.17	0.033358	0.065007	0.058757	0.069128	0.071136	0.062106	0.051181	0.063093	0.042849	0.06203	0.060748	0.081594
3628.1	0.027864	0.062259	0.060515	0.067868	0.073329	0.060048	0.052857	0.061642	0.041781	0.060744	0.059523	0.080927
3630.03	0.025241	0.058275	0.056473	0.063352	0.066436	0.054714	0.046049	0.058053	0.036675	0.055382	0.054476	0.078182
3631.96	0.02693	0.057671	0.051377	0.061339	0.05995	0.052605	0.042355	0.054722	0.033729	0.05256	0.051507	0.074307
3633.89	0.026054	0.055706	0.048054	0.05941	0.055873	0.050051	0.03999	0.052394	0.031042	0.049897	0.049885	0.072038
3635.82	0.024462	0.053536	0.044738	0.057439	0.052036	0.047804	0.037234	0.050042	0.028261	0.047393	0.048139	0.069428
3637.75	0.022496	0.051638	0.042429	0.055704	0.049663	0.046164	0.035617	0.048522	0.026042	0.045694	0.046773	0.067151
3639.68	0.02096	0.050059	0.041225	0.054004	0.048136	0.044591	0.033911	0.04677	0.024356	0.044413	0.0448	0.065303
3641.6	0.019422	0.049181	0.041303	0.053041	0.048414	0.043791	0.032713	0.045464	0.023633	0.043533	0.043049	0.064367
3643.53	0.017257	0.048323	0.041418	0.052389	0.04862	0.042593	0.031202	0.044738	0.022298	0.042235	0.041488	0.063705
3645.46	0.014518	0.047605	0.043182	0.052158	0.051726	0.042449	0.032633	0.044571	0.021775	0.042045	0.041415	0.062639
3647.39	0.008036	0.045972	0.048267	0.052021	0.059764	0.043026	0.035509	0.044912	0.022821	0.043233	0.042431	0.063523
3649.32	0.003321	0.043038	0.046877	0.04969	0.057548	0.040007	0.033815	0.041699	0.020994	0.041726	0.041393	0.061841
3651.25	0.005722	0.040551	0.040239	0.046241	0.047245	0.035404	0.027023	0.039314	0.016678	0.036922	0.03777	0.06009
3653.18	0.008613	0.040501	0.035217	0.044545	0.039173	0.033341	0.023372	0.036704	0.013504	0.033668	0.034137	0.056505
3655.11	0.00718	0.039272	0.033196	0.04316	0.03664	0.031562	0.022939	0.03492	0.011951	0.032165	0.033227	0.053948
3657.04	0.005718	0.03723	0.031543	0.041695	0.034462	0.029363	0.020471	0.033085	0.010129	0.030394	0.032019	0.053394
3658.96	0.006382	0.036539	0.028529	0.040575	0.030052	0.028131	0.018364	0.030772	0.007849	0.028649	0.029695	0.050799
3660.89	0.005939	0.035423	0.02631	0.039148	0.027253	0.026302	0.016842	0.029214	0.00591	0.026686	0.02768	0.048944
3662.82	0.005261	0.034428	0.025035	0.038117	0.025831	0.024797	0.015187	0.027832	0.004156	0.025228	0.026435	0.047678
3664.75	0.004031	0.033472	0.024778	0.037657	0.025863	0.024287	0.01409	0.027528	0.003414	0.024581	0.026156	0.047291
3666.68	0.001292	0.03297	0.025753	0.037607	0.027916	0.024322	0.01431	0.027407	0.003319	0.024441	0.025305	0.046732
3668.61	-0.003809	0.032245	0.028649	0.037723	0.032844	0.024959	0.016689	0.027348	0.003898	0.025445	0.025405	0.045775
3670.54	-0.006697	0.031213	0.030951	0.037429	0.035701	0.02431	0.015509	0.029129	0.003621	0.025142	0.025574	0.049259
3672.47	-0.005415	0.031198	0.028698	0.036424	0.0312	0.022723	0.013521	0.026237	0.001275	0.023513	0.023062	0.046968
3674.39	-0.008414	0.029837	0.02963	0.035392	0.032226	0.022289	0.016601	0.024595	0.001378	0.023562	0.023518	0.045015
3676.32	-0.00946	0.028198	0.029833	0.034488	0.032602	0.020851	0.014836	0.025588	0.000799	0.022978	0.023872	0.046961
3678.25	-0.006782	0.027885	0.025023	0.033048	0.0256	0.018935	0.011021	0.022761	-0.001792	0.020555	0.021471	0.043801
3680.18	-0.005918	0.026981	0.021084	0.031786	0.020582	0.016843	0.00829	0.020672	-0.003975	0.018122	0.019466	0.042093
3682.11	-0.005071	0.02636	0.018518	0.031083	0.017513	0.015652	0.006062	0.019284	-0.00532	0.016703	0.018179	0.040342
3684.04	-0.00572	0.025929	0.018005	0.030954	0.017247	0.015054	0.005516	0.019107	-0.005921	0.016082	0.017909	0.039516
3685.97	-0.008333	0.025193	0.018703	0.031074	0.018818	0.014814	0.006099	0.018774	-0.006195	0.015944	0.017661	0.039109
3687.9	-0.012775	0.024059	0.021162	0.031203	0.022814	0.015442	0.0079	0.018666	-0.005536	0.017014	0.018482	0.039824
3689.83	-0.014331	0.023645	0.02331	0.031871	0.025689	0.015453	0.008346	0.019314	-0.004685	0.018007	0.019247	0.041903
3691.75	-0.010987	0.023917	0.020743	0.030808	0.020267	0.014069	0.005769	0.018449	-0.006328	0.016108	0.017666	0.040618
3693.68	-0.00866	0.024242	0.017718	0.029615	0.015133	0.013035	0.003621	0.016776	-0.008164	0.014206	0.015959	0.038241
3695.61	-0.007985	0.024024	0.016414	0.02911	0.013273	0.012337	0.002955	0.01569	-0.009156	0.013475	0.015253	0.036945
3697.54	-0.007774	0.023455	0.015959	0.029168	0.012505	0.011528	0.002216	0.015742	-0.00974	0.012786	0.014786	0.037132
3699.47	-0.008886	0.02316	0.015909	0.029047	0.012277	0.011402	0.002303	0.014994	-0.010052	0.012629	0.014235	0.036003
3701.4	-0.010604	0.022923	0.016851	0.029095	0.013749	0.012001	0.002972	0.014998	-0.009913	0.01308	0.015027	0.036652
3703.33	-0.010301	0.022613	0.015725	0.029174	0.012799	0.011557	0.001799	0.014837	-0.010095	0.012359	0.01456	0.037213
3705.26	-0.010081	0.022346	0.014793	0.028939	0.012044	0.011187	0.001391	0.014808	-0.011016	0.012005	0.013551	0.036234
3707.18	-0.011325	0.02204	0.015803	0.028801	0.013964	0.011708	0.001965	0.015343	-0.0112	0.012239	0.013464	0.036081
3709.11	-0.014024	0.021999	0.018821	0.029163	0.018844	0.012297	0.003859	0.015556	-0.009618	0.013384	0.013828	0.036656
3711.04	-0.015756	0.022433	0.022152	0.029708	0.023175	0.013112	0.006533	0.016025	-0.00755	0.015061	0.015454	0.038421
3712.97	-0.012879	0.02247	0.020621	0.028921	0.019325	0.012542	0.004135	0.015785	-0.008243	0.013999	0.015783	0.038407
3714.9	-0.010043	0.022269	0.017017	0.027982	0.014373	0.010886	0.001792	0.014752	-0.01033	0.012437	0.014056	0.036453
3716.83	-0.010435	0.021846	0.015027	0.027761	0.012275	0.010131	0.001365	0.014031	-0.011494	0.011311	0.012672	0.035168
3718.76	-0.011761	0.021761	0.016233	0.028274	0.013408	0.010671	0.001753	0.014548	-0.01165	0.011339	0.012772	0.035722
3720.69	-0.012501	0.021974	0.017885	0.028598	0.015853	0.011422	0.002943	0.015215	-0.01052	0.01205	0.013364	0.035932
3722.61	-0.013286	0.022442	0.020171	0.029542	0.019218	0.012837	0.003542	0.01658	-0.008861	0.013035	0.014304	0.036994
3724.54	-0.012889	0.022684	0.020768	0.030083	0.01972	0.013442	0.003414	0.01583	-0.009099	0.013679	0.014452	0.036997
3726.47	-0.012792	0.022273	0.01977	0.030223	0.018298	0.012709	0.002233	0.015376	-0.009676	0.013616	0.014274	0.037434
3728.4	-0.012807	0.022109	0.017519	0.029654	0.015355	0.011356	0.00017	0.014723	-0.011397	0.01223	0.012769	0.036963
3730.33	-0.014546	0.021402	0.016399	0.028726	0.01565	0.010409	0.000639	0.013811	-0.012042	0.011558	0.011882	0.035043
3732.26	-0.017944	0.021207	0.020356	0.029546	0.021582	0.011611	0.002852	0.015802	-0.009734	0.012628	0.012854	0.036027
3734.19	-0.019238	0.022527	0.025898	0.030157	0.026971	0.014129	0.00584	0.016718	-0.007547	0.014352	0.014201	0.037053
3736.12	-0.018785	0.023162	0.027337	0.029903	0.028798	0.01465	0.006269	0.017574	-0.007333	0.015561	0.016363	0.039505
3738.05	-0.016883	0.022409	0.02219	0.029242	0.023245	0.012861	0.003357	0.016482	-0.009452	0.013655	0.014659	0.038348
3739.97	-0.015624	0.021662	0.01973	0.028529	0.020849	0.012275	0.002486	0.016025	-0.010637	0.012108	0.013377	0.037345
3741.9	-0.016018	0.021486	0.019593	0.027827	0.020047	0.011986	0.002913	0.015217	-0.011375	0.011631	0.012632	0.035246
3743.83	-0.018642	0.02085	0.021088	0.027635	0.022253	0.01167	0.005117	0.015744	-0.010192	0.012782	0.01373	0.035924
3745.76	-0.019411	0.021805	0.024146	0.029183	0.027381	0.013281	0.004713	0.017948	-0.008089	0.014124	0.014767	0.040359
3747.69	-0.020029	0.021173	0.022574	0.02871	0.026251	0.013134	0.004381	0.017069	-0.009205	0.013366	0.013059	0.038065
3749.62	-0.02273	0.020295	0.023412	0.028792	0.028322	0.012617	0.007553	0.017038	-0.008078	0.014383	0.014405	0.038678
3751.55	-0.020967	0.021332	0.024342	0.02906	0.028223	0.012859	0.006859	0.01733	-0.006689	0.015567	0.015926	0.040942
3753.48	-0.0165	0.021097	0.02026	0.027899	0.02078	0.011347	0.002788	0.016319	-0.009281	0.012878	0.014064	0.039783
3755.4	-0.015082	0.020775	0.017177	0.026953	0.01648	0.010012	0.001115	0.014642	-0.011392	0.011058	0.012832	0.036809
3757.33	-0.01524	0.020626	0.016862	0.026491	0.016092	0.010251	0.001761	0.013955	-0.011856	0.011155	0.012975	0.035249
3759.26	-0.014894	0.020475	0.017145	0.026215	0.01536	0.01025	0.001943	0.014115	-0.011432	0.011129	0.013161	0.035827
3761.19	-0.013199	0.020678	0.015085	0.025874	0.012074	0.009045	-0.000401	0.01371	-0.012109	0.009951	0.012366	0.035625
3763.12	-0.012464	0.020777	0.01386	0.025528	0.010367	0.008667	-0.00078	0.012471	-0.013294	0.009222	0.011613	0.033494
3765.05	-0.013312	0.020291	0.014914	0.025669	0.012705	0.008824	0.000268	0.013307	-0.012921	0.009956	0.012315	0.034493
3766.98	-0.013148	0.020737	0.014951	0.026492	0.012967	0.008971	0.000348	0.013325	-0.012473	0.010414	0.012251	0.035246
3768.91	-0.013672	0.020714	0.014561	0.026046	0.011577	0.008878	0.001037	0.012481	-0.012489	0.01027	0.012497	0.033925
3770.84	-0.012778	0.020746	0.014781	0.025658	0.010919	0.008755	6.4e-05	0.013272	-0.012765	0.009895	0.013152	0.035275
3772.76	-0.010951	0.020766	0.012672	0.025073	0.007581	0.008074	-0.001599	0.012393	-0.014093	0.008658	0.011885	0.034134
3774.69	-0.010928	0.020352	0.011331	0.024796	0.006277	0.007366	-0.001849	0.012155	-0.01484	0.008086	0.011152	0.033538
3776.62	-0.011875	0.020357	0.011403	0.025026	0.006968	0.007269	-0.001362	0.012088	-0.014808	0.00864	0.010777	0.03321
3778.55	-0.013637	0.020233	0.012561	0.025098	0.008999	0.007974	-0.000339	0.012269	-0.014157	0.009621	0.010989	0.033778
3780.48	-0.012812	0.020563	0.01337	0.025415	0.010015	0.008474	-0.000724	0.013254	-0.013444	0.009359	0.011323	0.035436
3782.41	-0.011874	0.020731	0.012522	0.025076	0.008492	0.007832	-0.00111	0.012142	-0.013863	0.008944	0.011296	0.033827
3784.34	-0.012632	0.020762	0.013392	0.025067	0.009406	0.00819	-3.6e-05	0.011978	-0.013876	0.009716	0.012196	0.034175
3786.27	-0.011914	0.020959	0.013299	0.025187	0.00878	0.008414	-0.000341	0.01249	-0.013811	0.009685	0.012346	0.035038
3788.19	-0.010848	0.020552	0.01147	0.024981	0.006303	0.007586	-0.001474	0.011722	-0.014604	0.008798	0.011383	0.033988
3790.12	-0.010714	0.020502	0.010726	0.025098	0.005724	0.007539	-0.001942	0.011319	-0.014916	0.008482	0.010807	0.033317
3792.05	-0.011166	0.020704	0.010813	0.025204	0.006535	0.007408	-0.002235	0.011572	-0.014994	0.008212	0.010855	0.033432
3793.98	-0.012582	0.020278	0.011111	0.025276	0.007909	0.007363	-0.001658	0.011517	-0.015108	0.008453	0.010377	0.033035
3795.91	-0.014979	0.019824	0.013487	0.025625	0.012045	0.008435	6.6e-05	0.012658	-0.013957	0.009892	0.010918	0.034536
3797.84	-0.015906	0.020688	0.016313	0.026262	0.015659	0.009342	0.000667	0.014459	-0.012946	0.01081	0.012066	0.036861
3799.77	-0.017533	0.020597	0.016132	0.026184	0.015806	0.009055	0.001899	0.013474	-0.012995	0.010703	0.011876	0.034391
3801.7	-0.019526	0.019777	0.018136	0.026821	0.019345	0.009675	0.003329	0.015587	-0.011343	0.011496	0.013984	0.03709
3803.63	-0.016257	0.020655	0.016565	0.026915	0.015507	0.009405	0.000567	0.015021	-0.011676	0.010408	0.012757	0.037063
3805.55	-0.015723	0.020067	0.014065	0.025748	0.011981	0.008266	0.000736	0.013347	-0.012552	0.00965	0.011403	0.033903
3807.48	-0.015213	0.019942	0.01394	0.025897	0.011888	0.008392	0.000248	0.013923	-0.01302	0.010172	0.012062	0.035933
3809.41	-0.012483	0.020725	0.012407	0.02602	0.008583	0.007996	-0.002045	0.012727	-0.014266	0.009448	0.011137	0.034928
3811.34	-0.012077	0.020917	0.011744	0.0255	0.007343	0.007594	-0.002495	0.012502	-0.014746	0.008608	0.010813	0.034065
3813.27	-0.013858	0.021194	0.012181	0.025588	0.008846	0.007877	-0.001689	0.011803	-0.014793	0.008651	0.010447	0.033723
3815.2	-0.017427	0.020587	0.014457	0.026079	0.01344	0.008442	0.000515	0.012842	-0.013538	0.010078	0.011488	0.034474
3817.13	-0.017849	0.02121	0.017998	0.02703	0.018462	0.009782	0.001039	0.01616	-0.011407	0.011425	0.013065	0.038008
3819.06	-0.017509	0.021392	0.018137	0.026713	0.017998	0.009858	0.002423	0.014363	-0.011109	0.011941	0.012085	0.035348
3820.98	-0.019271	0.020116	0.019414	0.026616	0.020154	0.010076	0.005199	0.015281	-0.009816	0.013194	0.014064	0.037412
3822.91	-0.015931	0.021156	0.018111	0.027333	0.016865	0.010409	0.001891	0.015209	-0.011121	0.011976	0.013966	0.038328
3824.84	-0.014668	0.02149	0.015713	0.026919	0.012721	0.00939	0.000837	0.013287	-0.012651	0.010861	0.012537	0.035275
3826.77	-0.014913	0.021194	0.015427	0.026577	0.012716	0.008959	0.000683	0.014066	-0.012626	0.010879	0.01258	0.036135
3828.7	-0.01373	0.021272	0.014369	0.026283	0.011247	0.009118	-0.000585	0.013631	-0.01333	0.010078	0.011829	0.035695
3830.63	-0.0145	0.020503	0.01358	0.026092	0.011285	0.00888	-0.000578	0.013238	-0.013433	0.009558	0.011582	0.0348
3832.56	-0.01589	0.020717	0.014973	0.026547	0.014039	0.009317	-5.5e-05	0.014191	-0.012786	0.010166	0.011902	0.035971
3834.49	-0.017144	0.021077	0.016194	0.026842	0.016083	0.009993	0.001106	0.014441	-0.012694	0.011346	0.012054	0.035858
3836.42	-0.018905	0.020745	0.018438	0.027068	0.019055	0.010714	0.002937	0.015414	-0.011556	0.012838	0.013336	0.036569
3838.34	-0.019421	0.021429	0.021735	0.027944	0.022917	0.012031	0.004526	0.016961	-0.009966	0.013948	0.015256	0.038816
3840.27	-0.017398	0.021892	0.0213	0.028207	0.022165	0.012236	0.003983	0.01691	-0.010238	0.01367	0.015339	0.039699
3842.2	-0.015135	0.021603	0.017652	0.027088	0.016126	0.010785	0.001894	0.014162	-0.01143	0.011883	0.013627	0.03725
3844.13	-0.014101	0.021574	0.01558	0.02663	0.01298	0.009878	3.4e-05	0.013342	-0.012474	0.010737	0.013193	0.036311
3846.06	-0.012577	0.021917	0.013958	0.026583	0.010433	0.009281	-0.001482	0.01307	-0.013693	0.009864	0.012225	0.035522
3847.99	-0.013183	0.02189	0.01414	0.026779	0.011354	0.009243	-0.000874	0.013934	-0.013639	0.009936	0.011724	0.03482
3849.92	-0.01612	0.022223	0.017344	0.027533	0.016861	0.010702	0.001618	0.015672	-0.012502	0.011488	0.012447	0.035389
3851.85	-0.019322	0.02221	0.021257	0.028003	0.022638	0.011896	0.006149	0.016947	-0.010146	0.013849	0.013672	0.036392
3853.77	-0.018683	0.021589	0.023099	0.028835	0.023622	0.011719	0.007564	0.018492	-0.007881	0.015418	0.016137	0.041247
3855.7	-0.015165	0.021811	0.020096	0.028413	0.018565	0.011482	0.003017	0.016195	-0.010066	0.013866	0.015349	0.039974
3857.63	-0.013326	0.022017	0.01722	0.027327	0.014073	0.010598	0.000513	0.01469	-0.012024	0.011982	0.013687	0.03757
3859.56	-0.013095	0.022101	0.015496	0.026927	0.012018	0.010169	-0.000134	0.013553	-0.012887	0.010737	0.012677	0.036114
3861.49	-0.014727	0.022184	0.016919	0.027753	0.015017	0.01119	0.001115	0.014138	-0.012106	0.011251	0.013047	0.035924
3863.42	-0.016118	0.022022	0.019071	0.028534	0.01889	0.012144	0.003083	0.015552	-0.010555	0.012713	0.014054	0.036622
3865.35	-0.015321	0.022286	0.019853	0.028824	0.019496	0.011896	0.002336	0.017325	-0.010567	0.012765	0.014695	0.039266
3867.28	-0.014243	0.022996	0.018677	0.028154	0.016167	0.011455	0.001491	0.01539	-0.011796	0.011604	0.013654	0.036995
3869.2	-0.015362	0.02279	0.020632	0.028098	0.019144	0.01207	0.004321	0.015487	-0.00994	0.012451	0.015001	0.037405
3871.13	-0.014975	0.023337	0.021786	0.029161	0.020223	0.012515	0.004085	0.016858	-0.009758	0.013579	0.015985	0.040697
3873.06	-0.014033	0.023064	0.018661	0.028421	0.015509	0.01122	0.002786	0.014696	-0.011316	0.012546	0.014882	0.037499
3874.99	-0.012977	0.022275	0.016847	0.027969	0.013922	0.009944	0.001352	0.015437	-0.011411	0.011665	0.014507	0.038474
3876.92	-0.011716	0.02263	0.014623	0.027546	0.011189	0.0093	-0.000486	0.014426	-0.013141	0.010533	0.013138	0.036998
3878.85	-0.012653	0.022494	0.01567	0.02743	0.012423	0.009767	0.001358	0.013939	-0.012766	0.010917	0.013749	0.03562
3880.78	-0.013171	0.022733	0.019765	0.028846	0.017584	0.011664	0.003199	0.01641	-0.010717	0.012652	0.015626	0.039569
3882.71	-0.012407	0.023248	0.018884	0.029178	0.016684	0.012217	0.002035	0.01561	-0.011445	0.012765	0.014602	0.038732
3884.64	-0.012871	0.022662	0.017786	0.028227	0.015614	0.011732	0.002744	0.014911	-0.011416	0.012377	0.014459	0.037526
3886.56	-0.01226	0.022686	0.017288	0.028301	0.014474	0.011112	0.001026	0.016169	-0.011252	0.011724	0.014858	0.039471
3888.49	-0.011143	0.02295	0.015195	0.028184	0.011634	0.01058	-0.000311	0.015039	-0.012658	0.011248	0.013211	0.036676
3890.42	-0.012298	0.022629	0.01672	0.028116	0.013395	0.011013	0.001661	0.015034	-0.01209	0.012451	0.013854	0.036089
3892.35	-0.012508	0.022999	0.018937	0.028861	0.015691	0.012137	0.002249	0.016018	-0.010619	0.013545	0.015501	0.038773
3894.28	-0.010682	0.023234	0.016714	0.028268	0.012776	0.011497	0.000701	0.015135	-0.011759	0.012244	0.014708	0.038204
3896.21	-0.010486	0.023126	0.015475	0.027754	0.012185	0.010906	0.000583	0.014583	-0.012872	0.011843	0.013903	0.036847
3898.14	-0.011972	0.023501	0.018159	0.028675	0.016179	0.01232	0.003095	0.016098	-0.011775	0.013093	0.014817	0.037184
3900.07	-0.012737	0.024425	0.021935	0.030074	0.020408	0.014509	0.005036	0.018462	-0.009485	0.014864	0.016295	0.039835
3901.99	-0.012788	0.024828	0.022948	0.0302	0.021448	0.015121	0.005966	0.017988	-0.008582	0.015599	0.016837	0.040414
3903.92	-0.012745	0.024328	0.022562	0.029832	0.020954	0.014562	0.006503	0.017566	-0.007994	0.015531	0.0176	0.041146
3905.85	-0.011061	0.023613	0.018993	0.029094	0.015437	0.012668	0.003449	0.016474	-0.009482	0.014057	0.016369	0.04054
3907.78	-0.009528	0.023418	0.014662	0.028034	0.009295	0.010414	0.000217	0.014429	-0.011848	0.011723	0.014509	0.038027
3909.71	-0.008501	0.023344	0.012808	0.027797	0.006785	0.009323	-0.000815	0.013501	-0.012924	0.01071	0.013908	0.036891
3911.64	-0.008617	0.023122	0.012799	0.028076	0.007114	0.009477	-0.000583	0.014042	-0.013151	0.0108	0.013978	0.037281
3913.57	-0.009299	0.02334	0.013417	0.028239	0.008812	0.009989	7.4e-05	0.01453	-0.012655	0.011069	0.013788	0.036813
3915.5	-0.010005	0.023812	0.016083	0.028845	0.011795	0.011301	0.001845	0.015271	-0.011195	0.012335	0.014787	0.037117
3917.43	-0.009514	0.024415	0.018254	0.029449	0.013611	0.012181	0.002616	0.016048	-0.010329	0.013616	0.015908	0.039008
3919.35	-0.008914	0.02445	0.01758	0.029341	0.012994	0.011562	0.001748	0.016179	-0.010886	0.013481	0.015824	0.039446
3921.28	-0.009255	0.024199	0.016707	0.029222	0.012002	0.011302	0.001242	0.015964	-0.01167	0.013123	0.015399	0.038816
3923.21	-0.009621	0.024405	0.017605	0.029205	0.013131	0.012153	0.002704	0.015931	-0.010928	0.013403	0.015729	0.038613
3925.14	-0.009636	0.024343	0.017921	0.02941	0.014055	0.012009	0.002646	0.016851	-0.010216	0.013306	0.016098	0.039896
3927.07	-0.009362	0.024262	0.0161	0.029413	0.011511	0.011343	0.001115	0.016141	-0.011559	0.012513	0.015246	0.039233
3929	-0.009523	0.024429	0.016724	0.029625	0.012506	0.01187	0.002335	0.016277	-0.011456	0.012819	0.015623	0.039187
3930.93	-0.008811	0.024836	0.018628	0.030133	0.014441	0.01272	0.003668	0.016636	-0.010153	0.013818	0.016544	0.040257
3932.86	-0.008233	0.024847	0.018417	0.030049	0.01311	0.012895	0.002719	0.016395	-0.010044	0.013916	0.016928	0.040195
3934.78	-0.008315	0.024408	0.015591	0.029446	0.010055	0.011462	0.000949	0.015581	-0.011717	0.012732	0.015805	0.03897
3936.71	-0.008175	0.024395	0.014008	0.029017	0.008808	0.010586	0.000701	0.014866	-0.012517	0.012021	0.015169	0.038187
3938.64	-0.007932	0.024634	0.014535	0.029193	0.009205	0.010907	0.001001	0.01537	-0.012053	0.012313	0.015419	0.038772
3940.57	-0.008086	0.024548	0.015247	0.029456	0.010052	0.011548	0.001721	0.015529	-0.011882	0.012694	0.015253	0.038509
3942.5	-0.008096	0.024649	0.017227	0.029928	0.012681	0.01254	0.003084	0.016408	-0.010826	0.013924	0.016522	0.03981
3944.43	-0.007833	0.024959	0.01726	0.030034	0.012153	0.012424	0.002489	0.016369	-0.01089	0.014118	0.016616	0.040396
3946.36	-0.007886	0.025161	0.016905	0.029974	0.01168	0.012174	0.00267	0.015813	-0.011091	0.013714	0.015946	0.039003
3948.29	-0.007915	0.02511	0.017993	0.03018	0.013179	0.012938	0.003453	0.016676	-0.009926	0.014114	0.017079	0.039396
3950.22	-0.007736	0.025053	0.017109	0.030004	0.011828	0.012546	0.001993	0.016512	-0.010638	0.013409	0.017102	0.039681
3952.14	-0.007456	0.024866	0.015424	0.029824	0.009751	0.011368	0.001129	0.015936	-0.011784	0.012523	0.016397	0.03895
3954.07	-0.007356	0.024806	0.014739	0.029416	0.009245	0.010972	0.001209	0.015554	-0.012052	0.012412	0.016031	0.038392
3956	-0.007067	0.025138	0.015072	0.029449	0.009885	0.01118	0.001396	0.015309	-0.012071	0.012782	0.015821	0.038605
3957.93	-0.007217	0.025592	0.015368	0.029831	0.009778	0.01135	0.00146	0.015774	-0.011585	0.013097	0.015918	0.039167
3959.86	-0.007194	0.025616	0.015507	0.029871	0.009786	0.011661	0.001787	0.015961	-0.011346	0.013069	0.016084	0.038629
3961.79	-0.007261	0.025097	0.015474	0.029981	0.010539	0.011976	0.0024	0.015861	-0.011114	0.013342	0.016553	0.038876
3963.72	-0.007599	0.024675	0.014522	0.029857	0.009175	0.01134	0.001552	0.015671	-0.011443	0.013243	0.016096	0.03924
3965.65	-0.00691	0.024498	0.013928	0.029661	0.007997	0.010908	0.00107	0.015384	-0.012191	0.012413	0.015435	0.038377
3967.57	-0.006843	0.02476	0.014698	0.029773	0.008531	0.011709	0.001284	0.015383	-0.011917	0.012094	0.015837	0.038335
3969.5	-0.007109	0.024945	0.015103	0.029759	0.009115	0.012055	0.00088	0.015891	-0.011516	0.012717	0.016424	0.038936
3971.43	-0.007171	0.025228	0.015246	0.029778	0.009359	0.011788	0.001352	0.01616	-0.011464	0.013353	0.016519	0.039147
3973.36	-0.007622	0.025454	0.015852	0.029978	0.009551	0.011893	0.002152	0.016036	-0.011206	0.013447	0.016155	0.039339
3975.29	-0.007753	0.025419	0.01572	0.029737	0.009456	0.012148	0.002054	0.016232	-0.01106	0.012902	0.016202	0.039726
3977.22	-0.007647	0.025317	0.014689	0.029607	0.008332	0.011614	0.001441	0.015997	-0.011426	0.012545	0.016101	0.039693
3979.15	-0.007533	0.025166	0.014061	0.029706	0.007531	0.010857	0.000936	0.015449	-0.011965	0.012587	0.015786	0.039496
3981.08	-0.007432	0.025125	0.014174	0.029536	0.008177	0.010787	0.000918	0.015332	-0.012045	0.012956	0.016147	0.039187
3983.01	-0.007189	0.024861	0.013888	0.029169	0.008136	0.01087	0.001054	0.015284	-0.0121	0.012897	0.015988	0.038908
3984.93	-0.007265	0.024511	0.013367	0.029216	0.007487	0.011127	0.000918	0.015185	-0.012327	0.012646	0.015709	0.038929
3986.86	-0.007402	0.024713	0.013637	0.029774	0.007546	0.011233	0.000925	0.015324	-0.012316	0.012954	0.01608	0.039141
3988.79	-0.007084	0.025328	0.01495	0.030082	0.00844	0.011711	0.001839	0.015718	-0.011814	0.013154	0.016536	0.039518
3990.72	-0.006869	0.025615	0.015783	0.030294	0.00866	0.012248	0.001973	0.01609	-0.01118	0.013483	0.016756	0.040137
3992.65	-0.007012	0.025581	0.015041	0.030241	0.007755	0.011875	0.001404	0.015974	-0.011306	0.013501	0.016587	0.039778
3994.58	-0.007456	0.025471	0.014332	0.029916	0.007714	0.011271	0.001352	0.016001	-0.011268	0.013267	0.016606	0.039425
3996.51	-0.007572	0.025347	0.014036	0.029966	0.007436	0.011177	0.00117	0.015916	-0.011486	0.013162	0.016358	0.039792
3998.44	-0.007488	0.025515	0.013747	0.029826	0.007339	0.011449	0.001272	0.015633	-0.012187	0.012908	0.016265	0.039444
4000.36	-0.007154	0.02542	0.013541	0.02993	0.007543	0.011626	0.001118	0.015482	-0.012282	0.012733	0.016265	0.039355

## Sheet: FTIR 1º derivative
	241_1.1	241_1.2	241_1.3	241_1.4	241_2.1	241_2.2	241_2.3	241_2.4	241_3.1	241_3.2	241_3.3	241_3.4
628.794	0.002	0.005857	-0.000699	0.000737	0.004271	0.000734	0.002786	0.007519	-0.001291	0.002695	0.007814	0.007422
630.723	0.003203	0.006314	0.000421	0.002399	0.005203	0.002347	0.00225	0.006343	-0.000556	0.00317	0.008423	0.012983
632.652	0.002872	0.006312	0.00181	0.002829	0.00355	0.003449	0.001223	0.003582	0.001686	0.003552	0.006544	0.014943
634.58	0.001906	0.005015	0.001877	0.002972	0.000671	0.003296	0.000207	0.000297	0.004248	0.004149	0.002598	0.010223
636.509	0.001879	0.003744	0.001607	0.002117	-0.000377	0.00373	0.000558	-0.000474	0.006325	0.004541	9e-06	0.002711
638.438	0.002374	0.004609	0.001182	0.001113	0.002022	0.004528	0.002208	0.003464	0.006627	0.005422	0.00139	-0.000431
640.367	0.003261	0.003966	0.00232	0.004107	0.005312	0.003602	0.001274	0.00655	0.004982	0.005882	0.004088	-0.00128
642.296	0.003194	0.002133	0.003993	0.006964	0.006039	0.00229	0.001647	0.005165	0.002866	0.00455	0.003921	0.000349
644.225	0.001414	0.00185	0.002807	0.005245	0.004696	0.001434	0.002933	0.002262	0.002352	0.002434	0.002648	0.003121
646.153	-4.9e-05	0.00185	0.000924	0.002685	0.001826	-0.000113	0.003902	0.000899	0.00186	0.002627	0.001641	0.00243
648.082	0.0002	0.001008	-0.000804	7.8e-05	2.4e-05	-2.9e-05	0.003727	0.00031	0.001722	0.003036	0.000752	0.000541
650.011	0.001517	0.000525	-0.000414	-0.001589	0.000311	0.001345	0.002872	0.000758	0.002027	0.002217	0.001442	0.000604
651.94	0.002204	0.00038	0.000997	-0.000976	0.001387	0.002261	0.001058	0.001095	0.002171	0.001537	0.001444	0.001749
653.869	0.002272	0.000484	0.002126	0.000649	0.001971	0.002219	2.2e-05	0.001065	0.00209	0.00105	0.001239	0.002079
655.797	0.002158	0.001191	0.001551	0.001323	0.001946	0.001369	0.001064	0.001147	0.001582	0.001281	0.001812	0.001411
657.726	0.001274	0.001211	0.00023	0.001615	0.001587	0.000315	0.001423	0.001079	0.000905	0.00185	0.002267	0.001044
659.655	0.00078	0.001076	-0.000184	0.001352	0.001361	0.000302	0.001035	0.001529	0.000669	0.002185	0.002387	0.000921
661.584	0.000904	0.001466	2.8e-05	0.001599	0.0011	0.000472	0.000572	0.001415	0.001079	0.0017	0.002681	0.001093
663.513	0.000416	0.001271	7.8e-05	0.001616	0.000261	-7.1e-05	-0.000256	0.000296	0.000372	0.000121	0.001314	0.000419
665.442	-0.000295	0.00064	8.1e-05	0.000483	-0.000195	-0.000355	-0.000917	-0.000428	-0.000486	-0.000503	-0.00047	-0.000289
667.37	-0.000954	-0.000492	-0.000243	-0.000813	-0.000633	-0.000887	-0.001237	-0.000736	-0.001252	-0.000751	-0.001306	-0.000677
669.299	-0.001459	-0.001592	-0.00093	-0.001789	-0.001046	-0.001058	-0.000974	-0.000852	-0.001481	-0.001219	-0.001638	-0.001032
671.228	-0.001871	-0.002013	-0.001468	-0.002313	-0.001084	-0.000992	-0.001015	-0.000964	-0.001224	-0.001631	-0.001814	-0.001188
673.157	-0.001682	-0.001897	-0.001916	-0.002252	-0.001152	-0.000973	-0.001065	-0.000933	-0.000947	-0.001661	-0.001606	-0.001182
675.086	-0.001716	-0.002049	-0.002458	-0.001687	-0.001915	-0.001492	-0.001461	-0.001419	-0.001455	-0.00185	-0.001867	-0.001834
677.014	-0.002545	-0.002633	-0.002894	-0.001913	-0.002695	-0.002473	-0.002331	-0.002268	-0.00275	-0.002599	-0.002867	-0.003037
678.943	-0.002734	-0.002683	-0.002664	-0.002365	-0.002619	-0.0029	-0.002647	-0.00257	-0.003043	-0.002721	-0.002806	-0.003228
680.872	-0.002491	-0.002457	-0.002208	-0.002504	-0.002311	-0.002776	-0.002675	-0.00261	-0.002797	-0.002666	-0.002625	-0.003009
682.801	-0.001961	-0.002013	-0.001712	-0.002561	-0.001577	-0.002049	-0.002219	-0.00229	-0.00203	-0.002418	-0.002431	-0.002478
684.73	-0.001303	-0.001498	-0.001196	-0.002433	-0.000849	-0.001315	-0.001651	-0.001608	-0.001467	-0.00196	-0.001943	-0.001769
686.658	-0.000779	-0.001095	-0.000714	-0.001906	-0.000543	-0.000829	-0.000944	-0.000889	-0.001199	-0.001474	-0.001398	-0.001106
688.587	-0.000374	-0.000567	-0.000271	-0.000965	-0.00045	-0.000483	-0.000176	-0.000363	-0.0008	-0.000866	-0.000781	-0.000612
690.516	0.000343	0.000282	0.000329	0.000177	-0.000225	2.9e-05	0.000386	0.000204	-0.00035	9e-06	2.9e-05	9.1e-05
692.445	0.001127	0.00102	0.001083	0.00105	0.000295	0.00065	0.000842	0.000757	0.000415	0.001026	0.000998	0.001
694.374	0.001556	0.001453	0.001517	0.001516	0.000961	0.00116	0.001091	0.001066	0.001318	0.001652	0.001684	0.001454
696.303	0.001361	0.001359	0.001405	0.001241	0.001071	0.001223	0.00099	0.001105	0.001715	0.001541	0.001663	0.001367
698.231	0.000422	0.000455	0.000622	0.00032	0.000176	0.000426	0.000365	0.000453	0.000934	0.000491	0.000832	0.000677
700.16	-0.000915	-0.000914	-0.00066	-0.00079	-0.001275	-0.001158	-0.000858	-0.001071	-0.000772	-0.001079	-0.000666	-0.000626
702.089	-0.002179	-0.002187	-0.002071	-0.002027	-0.002682	-0.002804	-0.002447	-0.002658	-0.002534	-0.002617	-0.002314	-0.002276
704.018	-0.003084	-0.003244	-0.003247	-0.003173	-0.003769	-0.004007	-0.003907	-0.003865	-0.003921	-0.003787	-0.003778	-0.003761
705.947	-0.003749	-0.003929	-0.003959	-0.003861	-0.004463	-0.004644	-0.004742	-0.004566	-0.004602	-0.004412	-0.004739	-0.004788
707.875	-0.004011	-0.004011	-0.004172	-0.003977	-0.004654	-0.004624	-0.004738	-0.004515	-0.004574	-0.004568	-0.004874	-0.005014
709.804	-0.003686	-0.003579	-0.00379	-0.003636	-0.004265	-0.00407	-0.004021	-0.003817	-0.004012	-0.004179	-0.004301	-0.004295
711.733	-0.002671	-0.002641	-0.00284	-0.002665	-0.003142	-0.003046	-0.002818	-0.002828	-0.002982	-0.003142	-0.003134	-0.002969
713.662	-0.001294	-0.001339	-0.001604	-0.001324	-0.001568	-0.001698	-0.001534	-0.001732	-0.001587	-0.00163	-0.00163	-0.00155
715.591	-0.000466	-0.000453	-0.000731	-0.000507	-0.000462	-0.000721	-0.000716	-0.000889	-0.000587	-0.00056	-0.000618	-0.000743
717.52	-0.000691	-0.000702	-0.000862	-0.000776	-0.000488	-0.00074	-0.000797	-0.00095	-0.000709	-0.00065	-0.00068	-0.000942
719.448	-0.001931	-0.001997	-0.00199	-0.002046	-0.001554	-0.001662	-0.001784	-0.001811	-0.001838	-0.001865	-0.001791	-0.002041
721.377	-0.003526	-0.003651	-0.003511	-0.003748	-0.00313	-0.003025	-0.003184	-0.002948	-0.003415	-0.003559	-0.00339	-0.003472
723.306	-0.004701	-0.004894	-0.00468	-0.005072	-0.004412	-0.004158	-0.004287	-0.003944	-0.004731	-0.004874	-0.004736	-0.004636
725.235	-0.005065	-0.005247	-0.005108	-0.005392	-0.004739	-0.004468	-0.00454	-0.004248	-0.005216	-0.005174	-0.005257	-0.005068
727.164	-0.004713	-0.004794	-0.004846	-0.004828	-0.004341	-0.004144	-0.004163	-0.003924	-0.004921	-0.004682	-0.004917	-0.004665
729.092	-0.004023	-0.004038	-0.004079	-0.003976	-0.00371	-0.003636	-0.00349	-0.003397	-0.004274	-0.003983	-0.004133	-0.003873
731.021	-0.003147	-0.003265	-0.003138	-0.003087	-0.002943	-0.002936	-0.002635	-0.002716	-0.003387	-0.003162	-0.003145	-0.002954
732.95	-0.002263	-0.002495	-0.002206	-0.00219	-0.002168	-0.00212	-0.001838	-0.001939	-0.002382	-0.002318	-0.00221	-0.002084
734.879	-0.001649	-0.001813	-0.001497	-0.001588	-0.001597	-0.001507	-0.001268	-0.001393	-0.001626	-0.001705	-0.001527	-0.001509
736.808	-0.001508	-0.001536	-0.001284	-0.001415	-0.001395	-0.001364	-0.001167	-0.001286	-0.001396	-0.001575	-0.001336	-0.001373
738.737	-0.00187	-0.00169	-0.001537	-0.001601	-0.001734	-0.0017	-0.001548	-0.001492	-0.00176	-0.001882	-0.0017	-0.001616
740.665	-0.002462	-0.002168	-0.001999	-0.002083	-0.002513	-0.002371	-0.002265	-0.002028	-0.002556	-0.002507	-0.002373	-0.002159
742.594	-0.003081	-0.002831	-0.002449	-0.00263	-0.003396	-0.003144	-0.002969	-0.002747	-0.003369	-0.003161	-0.003151	-0.002841
744.523	-0.003572	-0.00338	-0.002925	-0.003056	-0.004094	-0.003708	-0.00349	-0.003359	-0.003921	-0.003712	-0.003809	-0.003473
746.452	-0.003707	-0.003606	-0.003272	-0.003269	-0.004433	-0.003987	-0.003828	-0.003765	-0.004238	-0.00412	-0.004165	-0.003922
748.381	-0.003565	-0.003495	-0.003355	-0.003276	-0.004397	-0.004029	-0.003906	-0.003903	-0.004309	-0.004263	-0.004266	-0.004117
750.309	-0.003231	-0.003165	-0.003139	-0.003023	-0.00402	-0.003835	-0.003737	-0.003715	-0.004122	-0.00409	-0.004022	-0.003996
752.238	-0.00275	-0.002697	-0.00271	-0.002588	-0.003478	-0.003435	-0.00336	-0.003282	-0.003769	-0.003627	-0.003543	-0.003605
754.167	-0.002263	-0.002251	-0.002271	-0.002158	-0.00299	-0.003037	-0.002969	-0.002859	-0.00331	-0.003097	-0.003066	-0.003122
756.096	-0.00194	-0.00188	-0.00192	-0.00181	-0.002658	-0.002738	-0.002605	-0.002502	-0.002867	-0.002655	-0.002647	-0.002654
758.025	-0.001789	-0.001661	-0.00174	-0.001555	-0.002476	-0.002473	-0.002355	-0.002267	-0.002533	-0.002419	-0.002397	-0.002345
759.954	-0.001738	-0.001613	-0.001633	-0.001438	-0.002335	-0.00225	-0.002254	-0.002123	-0.002303	-0.002303	-0.002325	-0.002173
761.882	-0.001756	-0.001568	-0.001572	-0.001512	-0.002186	-0.00207	-0.002188	-0.00202	-0.002192	-0.002203	-0.002292	-0.002127
763.811	-0.001797	-0.001643	-0.00164	-0.001694	-0.002071	-0.001972	-0.002064	-0.001967	-0.002226	-0.002165	-0.002177	-0.002123
765.74	-0.001923	-0.001921	-0.001815	-0.001961	-0.002077	-0.001961	-0.001978	-0.00197	-0.002353	-0.002222	-0.00217	-0.002127
767.669	-0.002104	-0.00216	-0.002005	-0.002228	-0.00203	-0.001918	-0.001852	-0.00189	-0.002392	-0.002208	-0.00214	-0.002155
769.598	-0.002213	-0.002283	-0.002155	-0.002355	-0.001663	-0.001597	-0.001492	-0.001492	-0.002187	-0.002018	-0.001922	-0.002066
771.526	-0.002265	-0.002407	-0.002294	-0.002379	-0.001295	-0.001259	-0.001231	-0.001192	-0.001883	-0.001857	-0.0018	-0.001902
773.455	-0.002328	-0.002424	-0.002351	-0.00242	-0.001262	-0.001199	-0.001268	-0.00123	-0.001769	-0.001886	-0.001863	-0.001881
775.384	-0.002274	-0.002282	-0.002282	-0.00239	-0.001472	-0.001336	-0.001404	-0.001434	-0.001845	-0.001973	-0.001952	-0.001977
777.313	-0.002089	-0.002107	-0.0021	-0.002161	-0.001641	-0.001477	-0.001478	-0.001576	-0.001865	-0.001936	-0.001959	-0.00197
779.242	-0.001862	-0.001911	-0.001831	-0.001836	-0.001612	-0.001474	-0.001475	-0.001505	-0.001794	-0.001827	-0.00189	-0.001836
781.17	-0.001598	-0.001691	-0.001602	-0.00156	-0.001358	-0.001365	-0.001348	-0.001277	-0.00166	-0.001662	-0.001698	-0.001651
783.099	-0.001369	-0.001568	-0.001471	-0.001452	-0.001104	-0.001248	-0.001203	-0.001094	-0.001538	-0.001559	-0.001535	-0.00151
785.028	-0.001302	-0.00151	-0.001422	-0.0015	-0.001202	-0.001343	-0.001282	-0.001244	-0.001594	-0.00165	-0.00161	-0.001569
786.957	-0.001292	-0.001408	-0.001345	-0.001496	-0.001373	-0.001463	-0.001367	-0.001469	-0.001694	-0.001779	-0.001734	-0.001697
788.886	-0.00117	-0.001262	-0.001247	-0.001338	-0.001317	-0.001359	-0.001261	-0.001468	-0.001643	-0.001707	-0.001696	-0.001669
790.815	-0.000937	-0.001063	-0.001067	-0.001099	-0.001056	-0.001058	-0.001041	-0.001229	-0.001438	-0.001435	-0.001473	-0.001468
792.743	-0.000704	-0.000861	-0.000862	-0.000889	-0.00072	-0.000763	-0.000821	-0.000891	-0.001183	-0.001215	-0.001192	-0.001172
794.672	-0.000602	-0.000772	-0.000786	-0.000821	-0.000527	-0.00067	-0.000774	-0.000725	-0.00101	-0.00116	-0.001051	-0.001026
796.601	-0.000666	-0.000794	-0.000805	-0.000899	-0.000598	-0.000732	-0.000877	-0.00075	-0.001048	-0.001203	-0.001065	-0.001062
798.53	-0.000856	-0.0009	-0.000859	-0.000981	-0.00091	-0.000919	-0.001031	-0.00089	-0.001246	-0.001252	-0.001118	-0.001128
800.459	-0.001085	-0.001025	-0.000887	-0.000957	-0.001322	-0.001134	-0.001121	-0.001015	-0.00137	-0.001237	-0.001125	-0.001151
802.387	-0.001197	-0.000985	-0.000845	-0.000831	-0.001646	-0.001243	-0.001061	-0.001027	-0.001306	-0.001061	-0.000986	-0.001018
804.316	-0.001146	-0.000762	-0.000644	-0.000614	-0.001717	-0.001229	-0.00092	-0.000925	-0.00105	-0.000777	-0.000677	-0.000677
806.245	-0.001037	-0.000543	-0.000464	-0.000396	-0.001598	-0.001155	-0.000861	-0.000782	-0.000694	-0.000549	-0.000383	-0.000357
808.174	-0.000919	-0.00046	-0.000409	-0.000299	-0.001489	-0.001103	-0.000927	-0.00075	-0.000477	-0.000452	-0.000282	-0.000289
810.103	-0.000844	-0.000506	-0.000447	-0.000359	-0.001432	-0.001082	-0.00102	-0.000853	-0.000527	-0.000452	-0.000372	-0.000427
812.032	-0.000909	-0.000746	-0.000637	-0.000578	-0.001467	-0.001177	-0.001164	-0.00107	-0.000771	-0.000627	-0.000648	-0.000751
813.96	-0.001198	-0.001165	-0.00105	-0.001006	-0.001662	-0.001464	-0.001421	-0.001436	-0.00121	-0.001073	-0.001139	-0.001216
815.889	-0.001618	-0.00166	-0.001616	-0.001583	-0.00197	-0.001885	-0.001793	-0.001927	-0.001816	-0.001677	-0.001759	-0.001706
817.818	-0.002015	-0.002106	-0.002117	-0.00211	-0.002271	-0.002325	-0.002222	-0.002375	-0.002358	-0.002287	-0.002328	-0.002182
819.747	-0.002225	-0.002332	-0.002376	-0.002379	-0.002467	-0.002588	-0.002556	-0.002585	-0.002671	-0.00268	-0.00267	-0.002572
821.676	-0.002198	-0.002314	-0.002327	-0.002374	-0.002512	-0.002604	-0.00265	-0.002568	-0.002762	-0.002749	-0.002734	-0.002751
823.604	-0.002029	-0.002184	-0.002142	-0.002265	-0.002473	-0.002495	-0.002594	-0.002473	-0.002705	-0.002694	-0.00269	-0.002731
825.533	-0.001885	-0.002085	-0.001998	-0.002148	-0.002476	-0.002433	-0.002521	-0.002392	-0.002649	-0.002676	-0.002654	-0.002654
827.462	-0.00186	-0.00204	-0.001954	-0.002039	-0.002519	-0.002432	-0.00245	-0.002391	-0.002682	-0.002645	-0.002612	-0.002574
829.391	-0.001848	-0.001964	-0.001888	-0.001876	-0.002533	-0.002412	-0.002375	-0.002391	-0.002677	-0.002557	-0.002524	-0.002452
831.32	-0.001749	-0.001755	-0.001667	-0.001577	-0.002408	-0.002307	-0.002204	-0.002212	-0.002512	-0.002352	-0.002279	-0.002209
833.249	-0.001535	-0.001421	-0.001325	-0.001178	-0.002146	-0.002027	-0.001873	-0.001847	-0.0022	-0.001971	-0.001865	-0.00186
835.177	-0.001257	-0.001069	-0.000919	-0.000826	-0.001795	-0.001631	-0.001453	-0.001396	-0.001762	-0.001568	-0.001398	-0.001412
837.106	-0.000923	-0.000723	-0.000527	-0.000515	-0.001412	-0.001213	-0.001038	-0.000941	-0.001285	-0.001213	-0.001003	-0.000928
839.035	-0.000584	-0.000334	-0.000154	-0.00016	-0.001027	-0.000787	-0.000611	-0.000519	-0.000861	-0.000803	-0.000602	-0.00049
840.964	-0.000262	5.2e-05	0.000184	0.000176	-0.0006	-0.000363	-0.000224	-0.000152	-0.000448	-0.000327	-0.000165	-9e-05
842.893	7.5e-05	0.000373	0.000459	0.000435	-0.000167	4.5e-05	0.00011	0.000191	-1.6e-05	9.7e-05	0.000213	0.000271
844.821	0.00032	0.000559	0.000581	0.00058	0.000219	0.000337	0.00039	0.00046	0.00028	0.000378	0.000419	0.000465
846.75	0.000318	0.000467	0.000473	0.000491	0.000273	0.000291	0.000328	0.000348	0.000189	0.000276	0.000282	0.000283
848.679	5.8e-05	0.000138	0.000197	0.000187	-0.00018	-0.000202	-0.000194	-0.000169	-0.000315	-0.000289	-0.000198	-0.000219
850.608	-0.00025	-0.000157	-8.8e-05	-9.9e-05	-0.000893	-0.000867	-0.000836	-0.000786	-0.000946	-0.000907	-0.000801	-0.000797
852.537	-0.00033	-0.000189	-0.000147	-0.000145	-0.001358	-0.001273	-0.001216	-0.001159	-0.001248	-0.001193	-0.001085	-0.001078
854.465	-1.1e-05	0.000146	0.000149	0.000204	-0.001267	-0.001172	-0.001126	-0.001034	-0.000953	-0.000903	-0.000813	-0.000805
856.394	0.000614	0.00072	0.000704	0.000842	-0.000638	-0.000539	-0.000524	-0.000444	-0.000221	-0.000138	-0.00014	-5.2e-05
858.323	0.001132	0.001212	0.001192	0.001365	0.000191	0.000266	0.000257	0.000325	0.000548	0.00069	0.000612	0.000737
860.252	0.001241	0.001339	0.001358	0.001496	0.000718	0.000795	0.000777	0.000869	0.001014	0.001186	0.001122	0.001173
862.181	0.000974	0.001114	0.001154	0.001213	0.000911	0.001001	0.00103	0.001118	0.001115	0.001261	0.00129	0.001266
864.11	0.000537	0.000715	0.000746	0.000703	0.000973	0.00108	0.00114	0.001201	0.001063	0.001142	0.001216	0.001173
866.038	0.000162	0.000311	0.000334	0.000246	0.000979	0.001135	0.001144	0.001183	0.001026	0.000994	0.001099	0.001056
867.967	-6.6e-05	5.1e-05	4.8e-05	0	0.000948	0.001163	0.001106	0.001112	0.000958	0.000895	0.000995	0.001015
869.896	-0.000198	-0.000122	-0.000109	-0.000131	0.000887	0.00112	0.001037	0.001006	0.000836	0.000815	0.000871	0.000944
871.825	-0.000361	-0.000293	-0.000207	-0.00025	0.000703	0.00089	0.000849	0.000858	0.000644	0.000667	0.000705	0.000718
873.754	-0.000557	-0.000442	-0.000291	-0.000355	0.000344	0.00045	0.000499	0.000519	0.000323	0.000392	0.00042	0.000365
875.682	-0.000711	-0.00058	-0.000431	-0.000492	-0.000103	-3.7e-05	5.7e-05	3.4e-05	-6.9e-05	1.4e-05	3.9e-05	-4.1e-05
877.611	-0.000802	-0.000696	-0.000563	-0.000611	-0.000538	-0.000427	-0.000362	-0.000372	-0.000415	-0.000307	-0.000272	-0.000359
879.54	-0.0007	-0.000614	-0.000542	-0.000549	-0.000773	-0.00058	-0.000571	-0.000549	-0.000577	-0.000382	-0.00036	-0.000431
881.469	-0.000357	-0.000264	-0.000249	-0.000193	-0.000658	-0.00043	-0.000454	-0.000413	-0.000384	-0.000117	-0.000124	-0.000136
883.398	0.000175	0.000272	0.000293	0.000388	-0.00022	-6.2e-05	-1.6e-05	-9e-06	0.000166	0.000393	0.000404	0.000412
885.327	0.000741	0.000848	0.000857	0.000938	0.000349	0.000351	0.000485	0.000445	0.000789	0.000879	0.00095	0.000964
887.255	0.001115	0.001214	0.001179	0.001228	0.000769	0.000609	0.000744	0.000668	0.001126	0.001094	0.001213	0.001229
889.184	0.001191	0.0012	0.001139	0.00119	0.000881	0.000629	0.000682	0.000613	0.001075	0.000955	0.001065	0.001074
891.113	0.000977	0.000891	0.000816	0.000867	0.000677	0.000424	0.000364	0.000372	0.000725	0.000547	0.000623	0.000637
893.042	0.000623	0.000494	0.000408	0.000455	0.000277	0.000113	-2.6e-05	2e-05	0.000257	8.4e-05	0.000141	0.000157
894.971	0.000236	0.000128	8e-05	0.000135	-0.000149	-0.000206	-0.000344	-0.000287	-0.000151	-0.000249	-0.000192	-0.000161
896.899	-2.3e-05	-0.000106	-0.000101	-6e-05	-0.000478	-0.000465	-0.00051	-0.000435	-0.000416	-0.000424	-0.000304	-0.000291
898.828	-0.000119	-0.000191	-0.000149	-0.000121	-0.000637	-0.000594	-0.00054	-0.000437	-0.000501	-0.000433	-0.000276	-0.000316
900.757	-9.6e-05	-0.00012	-4.4e-05	-1.5e-05	-0.00059	-0.000537	-0.000418	-0.000334	-0.000393	-0.000283	-0.000208	-0.000255
902.686	0.000128	0.000155	0.000234	0.000258	-0.00032	-0.000247	-0.000129	-0.0001	-5.7e-05	-2.4e-05	-3.5e-05	-3.8e-05
904.615	0.000532	0.00058	0.000622	0.000637	0.000125	0.000213	0.000269	0.000258	0.000408	0.000345	0.000287	0.000361
906.544	0.000978	0.001011	0.000982	0.001007	0.000612	0.00067	0.00064	0.00063	0.000782	0.000721	0.000633	0.000794
908.472	0.001288	0.001268	0.001205	0.001265	0.000915	0.000925	0.000828	0.000873	0.000949	0.000981	0.000879	0.001035
910.401	0.001389	0.001332	0.001246	0.001369	0.000923	0.00089	0.000821	0.000912	0.000915	0.001036	0.000953	0.001028
912.33	0.001323	0.001269	0.001184	0.001339	0.000735	0.000652	0.000678	0.000749	0.000762	0.000906	0.000864	0.000874
914.259	0.001206	0.00119	0.001135	0.001283	0.00052	0.000436	0.000519	0.000495	0.000622	0.000709	0.000711	0.000727
916.188	0.001136	0.001151	0.001137	0.00125	0.000375	0.000351	0.000397	0.000316	0.00053	0.000527	0.000594	0.000646
918.116	0.001089	0.00112	0.00114	0.001193	0.000297	0.000315	0.000292	0.000251	0.000479	0.000442	0.00051	0.000583
920.045	0.000996	0.001024	0.001032	0.001071	0.000252	0.000291	0.000186	0.000201	0.000415	0.000415	0.000446	0.000443
921.974	0.000867	0.000887	0.000889	0.000919	0.00024	0.000272	0.000155	0.000154	0.000384	0.000432	0.000454	0.000286
923.903	0.000808	0.000838	0.000814	0.000846	0.000332	0.000324	0.000277	0.000253	0.000528	0.000541	0.000554	0.000364
925.832	0.000944	0.000945	0.000936	0.000976	0.000646	0.000573	0.000576	0.000511	0.000885	0.000796	0.000815	0.000729
927.76	0.001227	0.001232	0.001229	0.001254	0.001089	0.001025	0.001024	0.000907	0.00135	0.001213	0.00121	0.001197
929.689	0.001494	0.001566	0.001562	0.001528	0.001474	0.00149	0.00144	0.001356	0.001757	0.00169	0.001636	0.001632
931.618	0.001634	0.001756	0.001792	0.001722	0.001755	0.001836	0.001723	0.001705	0.002058	0.002078	0.002008	0.001957
933.547	0.001635	0.001787	0.001805	0.001787	0.001925	0.002034	0.001922	0.00193	0.00222	0.002299	0.002248	0.002128
935.476	0.001517	0.001705	0.001674	0.001695	0.001949	0.002044	0.002032	0.002044	0.002272	0.002345	0.002345	0.002208
937.405	0.001331	0.001512	0.001473	0.001524	0.001883	0.001989	0.002056	0.002064	0.002252	0.002289	0.002333	0.002225
939.333	0.001163	0.001312	0.001274	0.00135	0.00186	0.001981	0.002051	0.002063	0.00217	0.002207	0.002265	0.002161
941.262	0.001062	0.001213	0.001141	0.00119	0.001942	0.002044	0.002091	0.002114	0.002059	0.002136	0.002184	0.002084
943.191	0.001095	0.001165	0.001133	0.001139	0.002152	0.002144	0.002146	0.002162	0.00197	0.002054	0.002082	0.00207
945.12	0.001241	0.001214	0.001254	0.001256	0.002339	0.002171	0.002117	0.002116	0.001913	0.001918	0.001957	0.002067
947.049	0.001539	0.001488	0.001517	0.00155	0.002319	0.002061	0.001978	0.001971	0.00191	0.001796	0.001872	0.002022
948.977	0.00201	0.001969	0.001963	0.002053	0.002203	0.00196	0.001829	0.00184	0.002068	0.001876	0.001994	0.002141
950.906	0.002672	0.002632	0.002609	0.002765	0.002306	0.002125	0.001929	0.001981	0.002481	0.002338	0.002459	0.002556
952.835	0.003528	0.003502	0.003446	0.003642	0.002821	0.002706	0.002498	0.00256	0.003218	0.003184	0.003274	0.003298
954.764	0.004468	0.004506	0.004425	0.004584	0.003761	0.003706	0.003501	0.00353	0.004241	0.004277	0.004321	0.004334
956.693	0.00533	0.005401	0.005348	0.00544	0.004823	0.004772	0.004603	0.004602	0.005309	0.005363	0.005349	0.005346
958.622	0.005868	0.006047	0.005962	0.006057	0.005486	0.005452	0.005351	0.005318	0.006052	0.006108	0.006128	0.005999
960.55	0.006065	0.00633	0.006169	0.006299	0.005566	0.005604	0.005529	0.005499	0.006266	0.006322	0.006407	0.006181
962.479	0.005979	0.006202	0.006022	0.006193	0.005272	0.005338	0.00528	0.005264	0.006092	0.006142	0.006202	0.006035
964.408	0.005729	0.005846	0.005695	0.005894	0.004861	0.004907	0.004901	0.004846	0.005758	0.005778	0.005832	0.005721
966.337	0.005494	0.005538	0.005425	0.00561	0.004548	0.004597	0.004563	0.004527	0.005472	0.005423	0.005491	0.005415
968.266	0.005385	0.005451	0.005349	0.005526	0.004456	0.004492	0.00437	0.00444	0.005341	0.005249	0.005287	0.005319
970.194	0.005455	0.005589	0.005492	0.00572	0.004489	0.004487	0.00441	0.004509	0.005363	0.005293	0.005312	0.00541
972.123	0.005811	0.006046	0.005968	0.006212	0.004605	0.004663	0.004641	0.004718	0.005601	0.00556	0.005653	0.005694
974.052	0.006679	0.006916	0.006895	0.007074	0.00506	0.005251	0.005204	0.005252	0.006192	0.006201	0.006355	0.006337
975.981	0.008043	0.008269	0.00827	0.008401	0.006035	0.006269	0.006188	0.006138	0.007335	0.007343	0.007537	0.007376
977.91	0.009707	0.009985	0.009909	0.009989	0.007332	0.007495	0.007343	0.007212	0.008882	0.008816	0.009098	0.008741
979.839	0.011376	0.01166	0.011439	0.011491	0.008577	0.008563	0.008276	0.008197	0.010387	0.010252	0.010541	0.010068
981.767	0.01263	0.012923	0.012537	0.012686	0.009406	0.00918	0.00885	0.008839	0.011481	0.011322	0.011555	0.011035
983.696	0.013355	0.013693	0.013221	0.013541	0.009761	0.009416	0.009158	0.009174	0.012149	0.011951	0.012173	0.011683
985.625	0.013868	0.014217	0.013779	0.014172	0.009975	0.009621	0.009407	0.009435	0.012553	0.012372	0.012646	0.012193
987.554	0.014414	0.014736	0.01437	0.014852	0.01031	0.010067	0.009911	0.009856	0.012882	0.012806	0.013089	0.012679
989.483	0.014902	0.015293	0.015021	0.01555	0.010812	0.010696	0.010575	0.010461	0.01339	0.013343	0.013536	0.013212
991.411	0.015196	0.015599	0.015446	0.015839	0.011341	0.011307	0.011187	0.011092	0.01388	0.013878	0.013942	0.013772
993.34	0.015119	0.015376	0.01532	0.01553	0.011696	0.011738	0.011577	0.011557	0.014069	0.014047	0.01408	0.014007
995.269	0.014568	0.014727	0.014704	0.014739	0.011755	0.011913	0.011687	0.011797	0.013832	0.013841	0.013831	0.013854
997.198	0.013651	0.013731	0.013651	0.013628	0.011487	0.011741	0.011527	0.011691	0.013221	0.013288	0.013282	0.013411
999.127	0.012514	0.012522	0.012314	0.012245	0.01097	0.011192	0.011047	0.011207	0.012356	0.012342	0.012472	0.012524
1001.06	0.011339	0.01126	0.011033	0.010901	0.010281	0.010467	0.010395	0.010552	0.011399	0.011352	0.011398	0.011374
1002.98	0.010251	0.010125	0.010096	0.009852	0.009725	0.009817	0.009767	0.009935	0.010582	0.010566	0.010453	0.010459
1004.91	0.009562	0.009334	0.009487	0.009163	0.009536	0.009493	0.009431	0.009483	0.01005	0.010012	0.009906	0.009926
1006.84	0.009524	0.00915	0.009373	0.009026	0.009645	0.009594	0.009487	0.009362	0.009891	0.009771	0.009769	0.009819
1008.77	0.00989	0.009544	0.009766	0.009274	0.00993	0.009981	0.009818	0.009669	0.009976	0.009988	0.010074	0.010048
1010.7	0.01017	0.009946	0.010078	0.009524	0.010273	0.010341	0.010209	0.010077	0.010287	0.010319	0.010452	0.010263
1012.63	0.010063	0.010016	0.009997	0.009475	0.010428	0.010525	0.010417	0.010336	0.010506	0.010466	0.010576	0.010327
1014.56	0.009324	0.009368	0.009328	0.008971	0.010273	0.010433	0.010398	0.010342	0.01025	0.010417	0.010201	0.010147
1016.49	0.007796	0.007889	0.007983	0.007805	0.009705	0.009951	0.009983	0.009843	0.009449	0.009778	0.009228	0.009438
1018.41	0.005915	0.005979	0.006145	0.006076	0.008591	0.009005	0.009113	0.008778	0.008059	0.008444	0.007842	0.008229
1020.34	0.004092	0.003932	0.004214	0.004108	0.007041	0.007501	0.00778	0.007391	0.006278	0.006631	0.006258	0.006583
1022.27	0.002274	0.001924	0.002197	0.002101	0.005266	0.005744	0.006024	0.005987	0.004376	0.00468	0.004762	0.004736
1024.2	0.000614	0.000257	0.000196	0.000331	0.003586	0.00417	0.004327	0.004553	0.002692	0.002959	0.003248	0.003131
1026.13	-0.000855	-0.000942	-0.001263	-0.00108	0.002157	0.002844	0.002912	0.003183	0.001354	0.001569	0.00185	0.001758
1028.06	-0.002093	-0.001987	-0.002206	-0.002104	0.001067	0.001584	0.001703	0.001987	0.00033	0.000533	0.000576	0.000636
1029.99	-0.002847	-0.002732	-0.00264	-0.002694	0.000207	0.000463	0.000716	0.000866	-0.000367	-0.000308	-0.000541	-0.000143
1031.92	-0.003037	-0.002911	-0.002602	-0.002813	-0.00037	-0.000296	4.4e-05	8.8e-05	-0.000776	-0.000992	-0.001118	-0.000525
1033.85	-0.002695	-0.002657	-0.002347	-0.002534	-0.000677	-0.000602	-0.000279	-0.000207	-0.000935	-0.001238	-0.001312	-0.0007
1035.77	-0.002017	-0.00205	-0.001987	-0.001928	-0.00066	-0.00042	-0.000263	-1.3e-05	-0.000902	-0.000944	-0.001069	-0.000641
1037.7	-0.001318	-0.001194	-0.001489	-0.001124	-0.000251	7.1e-05	0.000103	0.000318	-0.0006	-0.000451	-0.000611	-0.000472
1039.63	-0.000782	-0.000496	-0.000862	-0.000492	0.000262	0.00051	0.000588	0.000603	-0.000117	-3.4e-05	-0.000116	-0.000317
1041.56	-0.000335	-0.00016	-0.000402	-0.000322	0.000664	0.000858	0.000984	0.000908	0.000233	0.000269	0.0004	9.9e-05
1043.49	-0.000129	3.6e-05	-0.000134	-0.000427	0.000964	0.001157	0.001224	0.001173	0.000464	0.000474	0.000749	0.000548
1045.42	-0.000332	-0.000126	-0.000188	-0.000617	0.001196	0.001309	0.001378	0.001448	0.000609	0.000622	0.000918	0.000834
1047.35	-0.00085	-0.000737	-0.00065	-0.000893	0.001241	0.001268	0.001436	0.001516	0.000694	0.000784	0.000812	0.000841
1049.28	-0.001587	-0.0016	-0.001408	-0.001332	0.001011	0.001045	0.001231	0.001276	0.000453	0.000604	0.000343	0.000551
1051.2	-0.00237	-0.002434	-0.002344	-0.002037	0.000564	0.000772	0.000879	0.00083	-0.000141	-4e-05	-0.000388	0.000158
1053.13	-0.002866	-0.003065	-0.003044	-0.002914	0.000122	0.00047	0.000568	0.000384	-0.000765	-0.000746	-0.000987	-0.00041
1055.06	-0.003046	-0.003378	-0.003252	-0.003427	-0.000216	0.000141	0.000286	0.000151	-0.001323	-0.001267	-0.001205	-0.001037
1056.99	-0.003079	-0.003379	-0.003189	-0.003319	-0.000501	-0.000284	-4.4e-05	-7.9e-05	-0.001564	-0.001511	-0.001352	-0.001563
1058.92	-0.002999	-0.003247	-0.00306	-0.00299	-0.00076	-0.000687	-0.000358	-0.000372	-0.001458	-0.00161	-0.001511	-0.001861
1060.85	-0.002807	-0.002998	-0.002868	-0.002666	-0.000987	-0.000951	-0.00072	-0.000717	-0.001428	-0.001746	-0.0017	-0.001933
1062.78	-0.002336	-0.002588	-0.002494	-0.002321	-0.001256	-0.001168	-0.001156	-0.001048	-0.001821	-0.002027	-0.002033	-0.001891
1064.71	-0.001638	-0.001977	-0.001773	-0.001922	-0.001382	-0.001373	-0.001555	-0.001212	-0.002241	-0.002277	-0.002229	-0.001895
1066.64	-0.000855	-0.001162	-0.000857	-0.001265	-0.001439	-0.001575	-0.001781	-0.001398	-0.002402	-0.002222	-0.002141	-0.001978
1068.56	-0.000147	-0.000248	-6.4e-05	-0.000468	-0.001677	-0.001795	-0.001851	-0.001655	-0.002345	-0.002058	-0.001989	-0.001865
1070.49	9.2e-05	8.8e-05	8.7e-05	-0.000263	-0.002141	-0.002141	-0.002071	-0.002137	-0.002234	-0.002043	-0.002128	-0.001836
1072.42	-0.000485	-0.000634	-0.000726	-0.000996	-0.002846	-0.002817	-0.002721	-0.002912	-0.002495	-0.002556	-0.00275	-0.002376
1074.35	-0.002029	-0.002348	-0.00238	-0.00247	-0.003907	-0.003937	-0.00387	-0.003968	-0.003403	-0.003729	-0.003905	-0.003512
1076.28	-0.004199	-0.00448	-0.004384	-0.00431	-0.005206	-0.005278	-0.005287	-0.005276	-0.004777	-0.005186	-0.005261	-0.005019
1078.21	-0.006331	-0.006372	-0.006336	-0.006075	-0.006339	-0.006521	-0.006608	-0.006499	-0.006164	-0.006472	-0.006437	-0.006444
1080.14	-0.007781	-0.007609	-0.007858	-0.007373	-0.007149	-0.007389	-0.007452	-0.007363	-0.007161	-0.007236	-0.007142	-0.007334
1082.07	-0.008358	-0.008219	-0.0085	-0.008214	-0.007562	-0.007723	-0.007711	-0.00775	-0.007609	-0.0075	-0.007411	-0.007641
1083.99	-0.008415	-0.008604	-0.00857	-0.008722	-0.007578	-0.007669	-0.007588	-0.007733	-0.007677	-0.007413	-0.007534	-0.007637
1085.92	-0.008355	-0.008748	-0.00859	-0.008847	-0.007428	-0.007569	-0.00746	-0.007518	-0.007603	-0.007377	-0.007589	-0.007582
1087.85	-0.008365	-0.008626	-0.008609	-0.008652	-0.007361	-0.007488	-0.007411	-0.007313	-0.007542	-0.007524	-0.00754	-0.007494
1089.78	-0.008447	-0.008445	-0.008587	-0.008375	-0.007296	-0.007352	-0.007334	-0.007292	-0.007605	-0.0077	-0.007448	-0.007448
1091.71	-0.008486	-0.008252	-0.008438	-0.008125	-0.007324	-0.00729	-0.007333	-0.007368	-0.007669	-0.007676	-0.007421	-0.007422
1093.64	-0.008272	-0.007967	-0.008048	-0.007795	-0.007475	-0.007345	-0.00738	-0.007411	-0.007585	-0.007443	-0.007361	-0.00735
1095.57	-0.007803	-0.007586	-0.007467	-0.007368	-0.007539	-0.007368	-0.00731	-0.007428	-0.007336	-0.007137	-0.007137	-0.007238
1097.5	-0.007273	-0.007152	-0.006967	-0.006908	-0.007425	-0.00728	-0.007142	-0.007292	-0.006948	-0.006847	-0.006854	-0.006979
1099.43	-0.006858	-0.006734	-0.006621	-0.006521	-0.007131	-0.007086	-0.006966	-0.006962	-0.00662	-0.006703	-0.006581	-0.006711
1101.35	-0.006576	-0.006465	-0.006408	-0.006293	-0.006726	-0.006706	-0.006663	-0.006524	-0.006424	-0.006617	-0.006396	-0.006454
1103.28	-0.006372	-0.006387	-0.006244	-0.006215	-0.006251	-0.006203	-0.006224	-0.006102	-0.006323	-0.00644	-0.006336	-0.006192
1105.21	-0.006202	-0.00631	-0.006029	-0.006168	-0.005807	-0.005864	-0.005761	-0.005755	-0.006205	-0.006192	-0.00619	-0.006
1107.14	-0.006011	-0.006155	-0.005903	-0.006079	-0.00548	-0.005649	-0.00539	-0.005509	-0.006053	-0.006045	-0.006002	-0.005949
1109.07	-0.00586	-0.00602	-0.005834	-0.005982	-0.005306	-0.005406	-0.005201	-0.00539	-0.005879	-0.005968	-0.005852	-0.005979
1111	-0.005765	-0.005899	-0.005739	-0.005882	-0.005239	-0.005283	-0.005223	-0.005359	-0.005812	-0.005923	-0.005867	-0.005942
1112.93	-0.005705	-0.005747	-0.005637	-0.005716	-0.005259	-0.005328	-0.005387	-0.005377	-0.005915	-0.005921	-0.005977	-0.005943
1114.86	-0.005568	-0.005569	-0.005531	-0.00553	-0.005411	-0.005407	-0.005569	-0.005436	-0.006013	-0.005896	-0.006039	-0.005902
1116.78	-0.00533	-0.005323	-0.005302	-0.005334	-0.005511	-0.005498	-0.005635	-0.005525	-0.005995	-0.005872	-0.006	-0.005804
1118.71	-0.005134	-0.005075	-0.005057	-0.005141	-0.005474	-0.005624	-0.005552	-0.00558	-0.005884	-0.005855	-0.005833	-0.00573
1120.64	-0.005032	-0.00498	-0.004992	-0.005049	-0.005497	-0.005657	-0.005483	-0.005564	-0.005806	-0.005814	-0.005706	-0.005684
1122.57	-0.005057	-0.005119	-0.005091	-0.005112	-0.005582	-0.005677	-0.005536	-0.005575	-0.005859	-0.005832	-0.005728	-0.005744
1124.5	-0.00524	-0.005393	-0.005303	-0.005349	-0.00573	-0.005821	-0.005749	-0.005708	-0.006066	-0.005986	-0.005981	-0.005961
1126.43	-0.005499	-0.005614	-0.005518	-0.005603	-0.005977	-0.006001	-0.006024	-0.005918	-0.00629	-0.006203	-0.006308	-0.006178
1128.36	-0.005572	-0.005628	-0.005513	-0.005613	-0.006112	-0.006037	-0.006144	-0.006043	-0.006337	-0.006258	-0.006434	-0.006191
1130.29	-0.005234	-0.005223	-0.005072	-0.00518	-0.005891	-0.005804	-0.005884	-0.005863	-0.006019	-0.005979	-0.006137	-0.005906
1132.21	-0.004393	-0.0043	-0.004149	-0.004259	-0.005297	-0.005216	-0.00519	-0.005231	-0.005269	-0.00526	-0.005342	-0.005199
1134.14	-0.003062	-0.002917	-0.002828	-0.002921	-0.004305	-0.00425	-0.00416	-0.004207	-0.004145	-0.004087	-0.004132	-0.004099
1136.07	-0.001457	-0.001301	-0.001272	-0.001337	-0.002948	-0.002998	-0.002944	-0.002986	-0.002711	-0.00266	-0.002668	-0.002799
1138	0.000162	0.000332	0.000282	0.000267	-0.001504	-0.001603	-0.001668	-0.001664	-0.001145	-0.001175	-0.001173	-0.001387
1139.93	0.0016	0.001788	0.001639	0.001671	-0.000175	-0.000286	-0.000455	-0.000426	0.000246	0.000225	0.000221	-1.5e-05
1141.86	0.002671	0.002808	0.002614	0.002678	0.000929	0.000805	0.000551	0.000556	0.001323	0.001378	0.001328	0.001051
1143.79	0.003194	0.003231	0.00304	0.003083	0.001646	0.001491	0.001197	0.001157	0.001988	0.002017	0.001941	0.001635
1145.72	0.003046	0.002995	0.002831	0.002794	0.001841	0.00164	0.001379	0.001259	0.00209	0.002036	0.001957	0.001714
1147.65	0.002202	0.002085	0.001952	0.001868	0.001521	0.00124	0.001064	0.000865	0.001613	0.001492	0.001407	0.001241
1149.57	0.000783	0.000648	0.000556	0.000489	0.000694	0.000419	0.000309	9.5e-05	0.000691	0.000487	0.000433	0.000278
1151.5	-0.000931	-0.000989	-0.001099	-0.001115	-0.000469	-0.000662	-0.000719	-0.000894	-0.000523	-0.000731	-0.000788	-0.00093
1153.43	-0.002603	-0.002608	-0.002735	-0.002779	-0.001671	-0.001812	-0.001811	-0.001959	-0.001843	-0.001949	-0.002025	-0.002203
1155.36	-0.004055	-0.004133	-0.004198	-0.004286	-0.002739	-0.00283	-0.002798	-0.002937	-0.00313	-0.003177	-0.003255	-0.003396
1157.29	-0.00531	-0.005482	-0.005431	-0.005569	-0.003605	-0.003685	-0.003645	-0.003762	-0.004334	-0.004401	-0.004433	-0.004495
1159.22	-0.006418	-0.006642	-0.00646	-0.006703	-0.004345	-0.004444	-0.004394	-0.004479	-0.005462	-0.005553	-0.005585	-0.00547
1161.15	-0.007346	-0.007574	-0.007319	-0.007621	-0.005017	-0.00513	-0.005066	-0.005095	-0.006503	-0.006548	-0.006654	-0.006383
1163.08	-0.008011	-0.0082	-0.007926	-0.008229	-0.005583	-0.005654	-0.005585	-0.005591	-0.007313	-0.0073	-0.007443	-0.007166
1165	-0.008323	-0.008448	-0.008237	-0.008502	-0.00596	-0.005995	-0.005902	-0.005925	-0.007797	-0.007729	-0.007855	-0.007571
1166.93	-0.008325	-0.008431	-0.008276	-0.008497	-0.006148	-0.006179	-0.006055	-0.006081	-0.007994	-0.007865	-0.007928	-0.007658
1168.86	-0.00826	-0.00837	-0.008184	-0.00835	-0.006354	-0.006399	-0.006274	-0.006245	-0.008123	-0.007982	-0.00798	-0.007742
1170.79	-0.008248	-0.008324	-0.008094	-0.008216	-0.006757	-0.006801	-0.006685	-0.006582	-0.008279	-0.00816	-0.008136	-0.007938
1172.72	-0.008146	-0.008178	-0.007941	-0.008046	-0.007197	-0.007182	-0.007067	-0.006921	-0.008332	-0.00824	-0.008264	-0.00804
1174.65	-0.00775	-0.007724	-0.007515	-0.007556	-0.007273	-0.007184	-0.007074	-0.006905	-0.008091	-0.007944	-0.008027	-0.007799
1176.58	-0.006904	-0.006844	-0.006652	-0.00662	-0.006712	-0.006571	-0.006475	-0.006323	-0.007316	-0.00711	-0.007187	-0.006999
1178.51	-0.005603	-0.005544	-0.005383	-0.005337	-0.005553	-0.005393	-0.005335	-0.005202	-0.006027	-0.00578	-0.005825	-0.005665
1180.44	-0.00412	-0.004062	-0.003929	-0.003941	-0.004066	-0.003954	-0.003913	-0.003812	-0.004494	-0.004243	-0.004277	-0.00417
1182.36	-0.002744	-0.002725	-0.002625	-0.00269	-0.002683	-0.002645	-0.002622	-0.00254	-0.003041	-0.002945	-0.002933	-0.002887
1184.29	-0.001568	-0.001616	-0.00161	-0.001681	-0.001602	-0.001607	-0.001632	-0.001566	-0.001842	-0.001932	-0.00187	-0.001875
1186.22	-0.000664	-0.000754	-0.000828	-0.000869	-0.000738	-0.000816	-0.0009	-0.000875	-0.000943	-0.001096	-0.001064	-0.001098
1188.15	0	-0.000116	-0.000237	-0.000216	-8.5e-05	-0.000239	-0.000373	-0.000376	-0.000336	-0.000441	-0.00047	-0.000536
1190.08	0.00052	0.000381	0.00025	0.000285	0.0004	0.000217	6.1e-05	2.7e-05	0.000142	7.7e-05	1.4e-05	-8.8e-05
1192.01	0.000927	0.000796	0.000686	0.000677	0.000825	0.000637	0.000481	0.00042	0.000562	0.000527	0.000422	0.000326
1193.94	0.001249	0.001132	0.00104	0.000985	0.001217	0.001038	0.000892	0.000828	0.000938	0.000895	0.000763	0.000737
1195.87	0.0015	0.001363	0.001277	0.001228	0.00153	0.001388	0.001252	0.001213	0.001263	0.001152	0.001088	0.001096
1197.79	0.001677	0.001519	0.001435	0.001398	0.001734	0.001622	0.001523	0.001503	0.001472	0.001362	0.001376	0.001337
1199.72	0.001715	0.001594	0.001522	0.001485	0.001789	0.001715	0.001691	0.001652	0.001545	0.001493	0.001512	0.001453
1201.65	0.001641	0.001569	0.001532	0.00149	0.001713	0.001727	0.00176	0.001711	0.001511	0.001509	0.001527	0.001442
1203.58	0.001543	0.001507	0.00152	0.001456	0.001643	0.00173	0.001775	0.001729	0.001493	0.001493	0.0015	0.001413
1205.51	0.001508	0.001501	0.001563	0.00147	0.0017	0.001781	0.0018	0.00176	0.001563	0.001562	0.001484	0.00149
1207.44	0.001596	0.001604	0.001665	0.001565	0.001849	0.001885	0.001879	0.001844	0.001755	0.001713	0.001586	0.001697
1209.37	0.001785	0.001805	0.001848	0.001754	0.002037	0.002048	0.002069	0.00202	0.002062	0.001964	0.001882	0.002
1211.3	0.002038	0.002093	0.002131	0.002054	0.00228	0.002297	0.002377	0.002323	0.002419	0.002362	0.00231	0.002365
1213.23	0.002309	0.002422	0.002441	0.002404	0.002551	0.002641	0.002727	0.002702	0.002768	0.002796	0.002759	0.002735
1215.15	0.002581	0.002719	0.002724	0.002712	0.002788	0.002978	0.003013	0.003058	0.003058	0.003158	0.003166	0.003034
1217.08	0.002812	0.002931	0.002938	0.002936	0.00295	0.003212	0.003203	0.003298	0.003277	0.003383	0.00343	0.003296
1219.01	0.002919	0.003023	0.003059	0.003044	0.003034	0.00329	0.003272	0.003343	0.003355	0.003442	0.003451	0.003443
1220.94	0.002857	0.002944	0.002986	0.002975	0.002958	0.00315	0.003153	0.003164	0.003246	0.003317	0.003272	0.00335
1222.87	0.00271	0.002749	0.00279	0.002786	0.00278	0.002911	0.002942	0.002928	0.003036	0.003114	0.003049	0.003126
1224.8	0.002551	0.002556	0.002571	0.002584	0.002624	0.002703	0.002745	0.002744	0.002809	0.002904	0.002834	0.002853
1226.73	0.002407	0.002388	0.002333	0.002382	0.002479	0.002529	0.002542	0.002575	0.002595	0.002673	0.00266	0.0026
1228.66	0.002223	0.002157	0.002078	0.002152	0.002299	0.00233	0.002326	0.002387	0.002372	0.002395	0.00244	0.002419
1230.58	0.001906	0.001815	0.001772	0.001853	0.002027	0.00204	0.002053	0.002098	0.002081	0.002042	0.002073	0.002168
1232.51	0.001437	0.001347	0.001335	0.001404	0.001612	0.0016	0.00162	0.001653	0.001628	0.00158	0.001549	0.001681
1234.44	0.000836	0.000742	0.000742	0.000787	0.001019	0.000994	0.001001	0.001049	0.000995	0.000975	0.000901	0.000991
1236.37	0.000194	8.8e-05	0.000108	7.9e-05	0.000372	0.000328	0.00032	0.000368	0.000291	0.000274	0.000242	0.000252
1238.3	-0.000453	-0.000576	-0.000554	-0.000642	-0.000263	-0.000335	-0.000368	-0.00039	-0.000442	-0.000469	-0.000464	-0.000525
1240.23	-0.001058	-0.001222	-0.001219	-0.001286	-0.000897	-0.001002	-0.001059	-0.001158	-0.001149	-0.001224	-0.00121	-0.001242
1242.16	-0.001566	-0.001768	-0.001785	-0.001801	-0.00146	-0.001604	-0.001621	-0.00177	-0.001742	-0.001892	-0.001856	-0.001792
1244.09	-0.001975	-0.002155	-0.002185	-0.002158	-0.001898	-0.002044	-0.00202	-0.00216	-0.002138	-0.002306	-0.002244	-0.002184
1246.02	-0.002253	-0.002398	-0.002419	-0.002361	-0.002202	-0.002292	-0.002269	-0.002325	-0.002369	-0.002486	-0.002419	-0.002402
1247.94	-0.002419	-0.002474	-0.002455	-0.002406	-0.002337	-0.002357	-0.002352	-0.002343	-0.002495	-0.002475	-0.002467	-0.002433
1249.87	-0.002469	-0.002404	-0.002374	-0.002367	-0.002343	-0.002319	-0.002314	-0.002294	-0.002513	-0.002395	-0.00242	-0.0024
1251.8	-0.00236	-0.002258	-0.002265	-0.002254	-0.002271	-0.002219	-0.002192	-0.002199	-0.002449	-0.002332	-0.002339	-0.002354
1253.73	-0.002148	-0.002074	-0.002051	-0.002039	-0.002055	-0.002053	-0.00199	-0.00202	-0.002302	-0.002237	-0.00223	-0.002227
1255.66	-0.001954	-0.001937	-0.001866	-0.001874	-0.001834	-0.001921	-0.00181	-0.00184	-0.002156	-0.002147	-0.002115	-0.002119
1257.59	-0.001847	-0.001886	-0.001771	-0.001825	-0.001745	-0.001847	-0.001717	-0.001729	-0.002013	-0.002048	-0.002008	-0.002043
1259.52	-0.001823	-0.001882	-0.001748	-0.001852	-0.00178	-0.001836	-0.001739	-0.001709	-0.001932	-0.001962	-0.001946	-0.001949
1261.45	-0.001908	-0.001912	-0.001815	-0.001938	-0.001952	-0.001961	-0.001889	-0.001831	-0.001945	-0.001934	-0.001934	-0.001882
1263.37	-0.002022	-0.001954	-0.001896	-0.002012	-0.002154	-0.002145	-0.002062	-0.002012	-0.001952	-0.001958	-0.001926	-0.001869
1265.3	-0.002068	-0.001961	-0.001879	-0.001971	-0.002211	-0.002249	-0.002171	-0.00213	-0.001952	-0.00195	-0.001885	-0.001841
1267.23	-0.002072	-0.001953	-0.001811	-0.001857	-0.002216	-0.002298	-0.002246	-0.002194	-0.002002	-0.001958	-0.001892	-0.001871
1269.16	-0.001965	-0.001857	-0.0018	-0.00174	-0.00227	-0.002265	-0.00224	-0.002161	-0.002019	-0.001944	-0.001871	-0.001909
1271.09	-0.001697	-0.001644	-0.0017	-0.001559	-0.002197	-0.002036	-0.002047	-0.001939	-0.001837	-0.001756	-0.001713	-0.001754
1273.02	-0.001379	-0.001386	-0.001485	-0.001321	-0.001927	-0.001708	-0.001752	-0.001634	-0.00157	-0.001495	-0.001509	-0.001469
1274.95	-0.001148	-0.001183	-0.001268	-0.001134	-0.001603	-0.001449	-0.001477	-0.001386	-0.001328	-0.001311	-0.001351	-0.001249
1276.88	-0.001031	-0.001071	-0.001095	-0.001021	-0.001325	-0.001276	-0.001267	-0.001222	-0.001173	-0.00121	-0.001228	-0.001133
1278.81	-0.001002	-0.001012	-0.001014	-0.000973	-0.001163	-0.0012	-0.001162	-0.001154	-0.00114	-0.001147	-0.001118	-0.001097
1280.73	-0.000933	-0.000911	-0.000878	-0.000865	-0.001	-0.001035	-0.000994	-0.001023	-0.001024	-0.000982	-0.000936	-0.000969
1282.66	-0.000761	-0.000712	-0.000601	-0.000659	-0.000706	-0.000719	-0.0007	-0.000749	-0.000757	-0.000683	-0.000669	-0.000684
1284.59	-0.000521	-0.00047	-0.00029	-0.000422	-0.000402	-0.000414	-0.000404	-0.000444	-0.000453	-0.000395	-0.000403	-0.000383
1286.52	-0.000275	-0.00022	-6.9e-05	-0.000163	-0.000197	-0.000186	-0.000182	-0.000168	-0.00022	-0.000194	-0.000157	-0.000158
1288.45	-3e-05	1.4e-05	4.4e-05	7.8e-05	-8.5e-05	-1.4e-05	1e-06	8.3e-05	-1.8e-05	6e-06	0.000106	4.8e-05
1290.38	0.000256	0.000268	0.000187	0.000349	6.7e-05	0.000206	0.000248	0.00034	0.00022	0.000289	0.000394	0.000346
1292.31	0.000582	0.000581	0.000442	0.00066	0.000369	0.000539	0.000581	0.000654	0.000553	0.000643	0.00069	0.000713
1294.24	0.000921	0.000903	0.00081	0.00096	0.000797	0.000941	0.000967	0.001009	0.000952	0.000998	0.00101	0.001106
1296.16	0.001132	0.001119	0.001082	0.001116	0.001107	0.001205	0.001224	0.001224	0.001191	0.001208	0.001232	0.001302
1298.09	0.001151	0.001156	0.001109	0.001087	0.001142	0.001218	0.001241	0.001231	0.001241	0.001239	0.001278	0.001247
1300.02	0.001006	0.001015	0.000968	0.000963	0.001018	0.001065	0.001096	0.001109	0.001181	0.001162	0.00121	0.001107
1301.95	0.000732	0.00073	0.000772	0.000743	0.000842	0.000817	0.000863	0.000887	0.000963	0.000983	0.001011	0.000917
1303.88	0.000393	0.000396	0.000477	0.000452	0.000514	0.000477	0.000541	0.000567	0.000604	0.000652	0.000662	0.000643
1305.81	0.000118	0.000163	0.000271	0.000251	0.000284	0.00024	0.000326	0.000348	0.000352	0.000397	0.000427	0.000496
1307.74	-0.000174	-6.4e-05	0.000167	4.7e-05	0.000168	6.6e-05	0.000131	0.000138	9.4e-05	0.000127	0.000195	0.000303
1309.67	-0.000472	-0.000319	-4e-05	-0.000226	-8.6e-05	-0.000159	-0.000159	-0.000154	-0.00023	-0.000211	-0.00014	-4.6e-05
1311.59	-0.000678	-0.000487	-0.000187	-0.000423	-0.000222	-0.000325	-0.000376	-0.000356	-0.000384	-0.000393	-0.000364	-0.000274
1313.52	-0.000932	-0.000709	-0.000361	-0.000654	-0.000398	-0.000604	-0.000652	-0.000621	-0.000612	-0.000656	-0.000656	-0.000566
1315.45	-0.001195	-0.001006	-0.000787	-0.000968	-0.000955	-0.001079	-0.001069	-0.001016	-0.001093	-0.001103	-0.001106	-0.001021
1317.38	-0.001271	-0.001167	-0.00126	-0.001151	-0.001606	-0.001473	-0.001363	-0.00129	-0.001466	-0.001415	-0.00137	-0.001289
1319.31	-0.0011	-0.00112	-0.001395	-0.00106	-0.001857	-0.001534	-0.00136	-0.001272	-0.001528	-0.001417	-0.001293	-0.001251
1321.24	-0.000786	-0.000893	-0.001241	-0.000814	-0.001768	-0.001336	-0.001217	-0.001071	-0.001393	-0.001248	-0.001102	-0.001114
1323.17	-0.000274	-0.000407	-0.000766	-0.00036	-0.001256	-0.000837	-0.000796	-0.000609	-0.0009	-0.000755	-0.000619	-0.000674
1325.1	0.000247	0.000159	-6e-06	0.00019	-0.00035	-0.000176	-0.000173	-9e-06	-0.000195	-9.2e-05	1e-06	-4.7e-05
1327.03	0.000546	0.000511	0.000515	0.000525	0.000236	0.000245	0.00024	0.000352	0.000243	0.000259	0.000296	0.000326
1328.95	0.000773	0.000746	0.00072	0.000735	0.000479	0.000553	0.000541	0.000599	0.000516	0.000496	0.000506	0.000622
1330.88	0.001035	0.001025	0.001045	0.001023	0.000953	0.001018	0.00099	0.000999	0.000976	0.000954	0.000969	0.001117
1332.81	0.001241	0.00136	0.001879	0.001443	0.002196	0.001782	0.001709	0.00164	0.00167	0.001665	0.001642	0.001771
1334.74	0.000928	0.001205	0.002249	0.001317	0.002854	0.001899	0.001804	0.001689	0.001607	0.001621	0.001501	0.001608
1336.67	0.00035	0.000555	0.001477	0.000657	0.001992	0.001142	0.001159	0.00107	0.000795	0.000855	0.000759	0.000793
1338.6	-0.000117	-0.000145	0.000118	-8.3e-05	0.000337	0.000155	0.000317	0.000301	-0.000118	-1.8e-05	1e-06	-2.9e-05
1340.53	-0.00037	-0.000622	-0.001169	-0.000604	-0.001212	-0.000564	-0.000363	-0.000273	-0.000776	-0.000672	-0.000545	-0.000534
1342.46	-0.000295	-0.000627	-0.001633	-0.000595	-0.001675	-0.000581	-0.000428	-0.000278	-0.00074	-0.000666	-0.000468	-0.000408
1344.38	-7.4e-05	-0.000267	-0.00107	-0.000207	-0.000946	-3.1e-05	4.3e-05	0.000169	-0.00014	-0.000133	3.7e-05	0.000146
1346.31	7.5e-05	0.000141	-3.3e-05	0.00023	0.000266	0.000607	0.0006	0.000666	0.000502	0.000465	0.000507	0.000647
1348.24	2.2e-05	0.000251	0.000493	0.000344	0.000679	0.000669	0.000658	0.000718	0.000586	0.000588	0.000542	0.000638
1350.17	0.000207	0.000447	0.00071	0.000535	0.000658	0.000697	0.000773	0.000849	0.000738	0.000835	0.000825	0.000828
1352.1	0.000603	0.000804	0.000991	0.00087	0.000823	0.000974	0.001121	0.001158	0.001072	0.001212	0.001225	0.001182
1354.03	0.001193	0.001374	0.001442	0.001451	0.001355	0.001601	0.001743	0.001738	0.00168	0.00181	0.001837	0.001792
1355.96	0.001903	0.00229	0.002621	0.002426	0.002843	0.002777	0.002885	0.002788	0.002887	0.002958	0.002974	0.002871
1357.89	0.002324	0.002904	0.003578	0.003008	0.003942	0.00354	0.00359	0.003415	0.003556	0.003537	0.003462	0.003329
1359.82	0.002918	0.003391	0.003873	0.003398	0.004241	0.003984	0.003952	0.003833	0.003905	0.003858	0.003757	0.003613
1361.74	0.003716	0.003994	0.004111	0.003922	0.004541	0.004503	0.004493	0.004451	0.00443	0.004438	0.004363	0.004248
1363.67	0.004083	0.004096	0.003831	0.003957	0.004226	0.004498	0.00454	0.004583	0.004348	0.004437	0.004372	0.004336
1365.6	0.004161	0.003892	0.003261	0.003754	0.003679	0.004368	0.004372	0.004498	0.004164	0.004297	0.004291	0.004295
1367.53	0.003939	0.00379	0.003422	0.003772	0.004241	0.004659	0.004639	0.004742	0.004495	0.004636	0.004691	0.004672
1369.46	0.003034	0.003266	0.003593	0.003336	0.004737	0.004432	0.004396	0.004446	0.004168	0.004253	0.004245	0.004223
1371.39	0.002344	0.002654	0.003124	0.00266	0.004163	0.003743	0.003697	0.003724	0.00335	0.003329	0.003262	0.003309
1373.32	0.002468	0.00258	0.002709	0.002483	0.003569	0.003493	0.003495	0.003496	0.003139	0.003043	0.003028	0.003085
1375.25	0.002695	0.002599	0.002437	0.002453	0.003169	0.003376	0.003481	0.003442	0.003103	0.002994	0.003018	0.003071
1377.17	0.002569	0.00222	0.001714	0.002033	0.002321	0.002947	0.003024	0.00308	0.00262	0.002531	0.002559	0.002645
1379.1	0.002702	0.002268	0.001567	0.002148	0.002451	0.003289	0.003313	0.003418	0.003004	0.002964	0.003029	0.003126
1381.03	0.002483	0.002394	0.002285	0.002476	0.003786	0.003877	0.004019	0.004024	0.003591	0.003661	0.003634	0.003787
1382.96	0.001426	0.001591	0.002005	0.001717	0.003533	0.003108	0.003285	0.003335	0.002593	0.002691	0.002549	0.002757
1384.89	0.000704	0.000805	0.00121	0.000848	0.00236	0.002133	0.002271	0.002394	0.001509	0.001555	0.001489	0.001637
1386.82	0.000583	0.000547	0.000717	0.000541	0.001583	0.001735	0.001863	0.001975	0.00118	0.001181	0.001283	0.001315
1388.75	0.000489	0.000604	0.000706	0.000621	0.001441	0.00168	0.001826	0.001848	0.001244	0.001274	0.001381	0.001465
1390.68	0.000556	0.000852	0.001052	0.000903	0.001846	0.001822	0.001901	0.001853	0.001544	0.001589	0.001514	0.001714
1392.61	0.000954	0.00144	0.001948	0.001627	0.003023	0.002378	0.002486	0.002295	0.002372	0.002432	0.002215	0.002427
1394.53	0.000454	0.00083	0.00149	0.000976	0.002264	0.001327	0.001432	0.001284	0.001318	0.001392	0.001083	0.001247
1396.46	6e-06	-0.000254	-0.000217	-0.000328	-0.000159	-0.000293	-0.000317	-0.000214	-0.000381	-0.00036	-0.000512	-0.000475
1398.39	0.000114	-0.000556	-0.001115	-0.000723	-0.001387	-0.000775	-0.000866	-0.000645	-0.000734	-0.00078	-0.000644	-0.000718
1400.32	-0.000279	-0.000908	-0.001574	-0.00108	-0.001957	-0.001295	-0.001383	-0.001212	-0.001078	-0.001231	-0.000996	-0.001048
1402.25	-0.001081	-0.0015	-0.001974	-0.00165	-0.002381	-0.002073	-0.00214	-0.002084	-0.001757	-0.001949	-0.001809	-0.001785
1404.18	-0.001591	-0.001909	-0.002135	-0.00201	-0.002491	-0.002581	-0.00269	-0.002723	-0.002169	-0.002358	-0.002342	-0.002332
1406.11	-0.00204	-0.002268	-0.002292	-0.002344	-0.002675	-0.003082	-0.003253	-0.003363	-0.002625	-0.002781	-0.002851	-0.002895
1408.04	-0.002578	-0.002916	-0.003133	-0.003102	-0.003764	-0.004032	-0.004317	-0.004383	-0.003636	-0.003721	-0.003869	-0.003972
1409.96	-0.002292	-0.002651	-0.003018	-0.002852	-0.003495	-0.003661	-0.004013	-0.004084	-0.003154	-0.003216	-0.003355	-0.003489
1411.89	-0.0019	-0.001767	-0.001576	-0.001806	-0.001454	-0.00234	-0.002662	-0.002885	-0.001685	-0.00175	-0.001907	-0.002023
1413.82	-0.003025	-0.00255	-0.001822	-0.002548	-0.001798	-0.003307	-0.003609	-0.00385	-0.002727	-0.002848	-0.00317	-0.003276
1415.75	-0.003867	-0.003539	-0.002904	-0.003613	-0.003235	-0.004563	-0.004848	-0.00498	-0.00408	-0.004185	-0.004546	-0.004689
1417.68	-0.004242	-0.004089	-0.003643	-0.004236	-0.004247	-0.005269	-0.005494	-0.005601	-0.004797	-0.004897	-0.005221	-0.00541
1419.61	-0.004612	-0.004803	-0.004893	-0.005092	-0.005873	-0.006294	-0.006541	-0.006584	-0.005931	-0.006092	-0.006315	-0.006501
1421.54	-0.003816	-0.004435	-0.005285	-0.004769	-0.006287	-0.00587	-0.006131	-0.006151	-0.005577	-0.005719	-0.005728	-0.005943
1423.47	-0.002265	-0.002849	-0.003722	-0.003038	-0.004252	-0.003691	-0.003897	-0.004069	-0.003398	-0.00351	-0.00336	-0.003621
1425.4	-0.001131	-0.001306	-0.001588	-0.001339	-0.001715	-0.001626	-0.001743	-0.002054	-0.001467	-0.001553	-0.001391	-0.001652
1427.32	-0.00066	-0.00068	-0.000694	-0.000774	-0.000943	-0.001011	-0.001175	-0.001381	-0.001123	-0.001216	-0.001157	-0.001369
1429.25	0.001135	0.001181	0.001174	0.001076	0.001389	0.001177	0.001002	0.000849	0.001198	0.001136	0.001193	0.001035
1431.18	0.00198	0.002317	0.002744	0.002293	0.003323	0.00261	0.002532	0.002443	0.002588	0.00263	0.0026	0.002524
1433.11	0.001689	0.001917	0.002274	0.001881	0.002615	0.002134	0.002059	0.002169	0.001784	0.001919	0.001824	0.001825
1435.04	0.001802	0.001727	0.001647	0.001707	0.001792	0.001929	0.001913	0.002077	0.001544	0.001695	0.001645	0.00168
1436.97	0.001524	0.001279	0.000919	0.001255	0.000776	0.001391	0.001463	0.001576	0.001032	0.001106	0.001079	0.001183
1438.9	0.00142	0.000982	0.000339	0.00092	-5e-05	0.000988	0.001056	0.001162	0.000669	0.000667	0.00071	0.000868
1440.83	0.001941	0.001629	0.001043	0.001648	0.000987	0.001847	0.00192	0.001947	0.001827	0.001769	0.001861	0.00198
1442.75	0.001879	0.002102	0.002126	0.002272	0.002504	0.00255	0.00273	0.002677	0.002746	0.002722	0.00276	0.002799
1444.68	0.001003	0.001561	0.002113	0.001754	0.002346	0.001941	0.002147	0.002192	0.001924	0.002043	0.00195	0.001944
1446.61	0.00075	0.001194	0.001639	0.001282	0.00157	0.001397	0.001491	0.001597	0.001187	0.001375	0.001235	0.001188
1448.54	0.001699	0.001896	0.00205	0.001952	0.002041	0.002102	0.00207	0.00212	0.002005	0.002112	0.002127	0.00204
1450.47	0.002543	0.003039	0.003501	0.003319	0.004293	0.003728	0.00382	0.003616	0.003996	0.004012	0.004224	0.004102
1452.4	0.000375	0.001729	0.002994	0.002111	0.003886	0.002301	0.002652	0.002254	0.002683	0.002655	0.002682	0.002706
1454.33	-0.002731	-0.00123	0.000166	-0.000982	0.000324	-0.001292	-0.00084	-0.00115	-0.001106	-0.001117	-0.001357	-0.001125
1456.26	-0.004481	-0.003846	-0.003374	-0.00389	-0.004208	-0.004594	-0.004328	-0.004339	-0.004695	-0.004634	-0.004947	-0.004601
1458.18	-0.004001	-0.004353	-0.005058	-0.004596	-0.006252	-0.005241	-0.005267	-0.005002	-0.005364	-0.005248	-0.005394	-0.005127
1460.11	-0.002786	-0.00368	-0.004938	-0.00396	-0.006106	-0.004372	-0.004606	-0.004214	-0.004549	-0.004397	-0.004341	-0.004242
1462.04	-0.001537	-0.002516	-0.003734	-0.002676	-0.004441	-0.002732	-0.002991	-0.002671	-0.002861	-0.002729	-0.002458	-0.002509
1463.97	-0.001967	-0.002408	-0.002997	-0.002365	-0.002891	-0.002028	-0.002044	-0.001989	-0.002023	-0.001934	-0.001608	-0.001685
1465.9	-0.004871	-0.004543	-0.004183	-0.004308	-0.003487	-0.003728	-0.003438	-0.003535	-0.003937	-0.003847	-0.003717	-0.003583
1467.83	-0.008619	-0.008083	-0.007112	-0.007722	-0.005834	-0.006767	-0.006359	-0.006444	-0.007376	-0.007332	-0.007306	-0.007042
1469.76	-0.011499	-0.010906	-0.009596	-0.010473	-0.007929	-0.009214	-0.008792	-0.008862	-0.010107	-0.010147	-0.010132	-0.009834
1471.69	-0.013369	-0.012917	-0.01168	-0.012563	-0.010465	-0.011491	-0.011095	-0.011034	-0.012651	-0.012708	-0.012707	-0.012391
1473.62	-0.012767	-0.012979	-0.012544	-0.012867	-0.012528	-0.012331	-0.012066	-0.011818	-0.013618	-0.013626	-0.013556	-0.013268
1475.54	-0.009422	-0.010274	-0.010834	-0.01036	-0.011723	-0.010235	-0.010112	-0.009805	-0.01122	-0.011198	-0.010952	-0.010754
1477.47	-0.00516	-0.006155	-0.007249	-0.006259	-0.008285	-0.006293	-0.006249	-0.005968	-0.006788	-0.00672	-0.006348	-0.00623
1479.4	-0.001973	-0.002508	-0.003228	-0.00243	-0.003762	-0.002322	-0.002254	-0.002046	-0.002566	-0.002393	-0.002029	-0.001937
1481.33	-0.000468	-0.000374	-0.000332	-0.000192	-0.00043	0.000161	0.000143	0.000296	-0.00013	1.2e-05	0.000253	0.000328
1483.26	0.001513	0.002325	0.003332	0.002743	0.004129	0.003478	0.003496	0.003488	0.003306	0.003393	0.003519	0.003575
1485.19	0.002863	0.003999	0.005581	0.004502	0.006682	0.005227	0.005347	0.005288	0.004965	0.005083	0.004983	0.005061
1487.12	0.004594	0.005353	0.006412	0.005656	0.007228	0.006255	0.006368	0.006354	0.005943	0.006049	0.005917	0.005986
1489.05	0.006393	0.006562	0.00657	0.006561	0.007008	0.007007	0.007121	0.007124	0.006906	0.006952	0.006941	0.006994
1490.97	0.007893	0.007747	0.006978	0.007543	0.007357	0.007996	0.008109	0.0081	0.008083	0.008104	0.00816	0.008208
1492.9	0.008775	0.008727	0.007898	0.008488	0.008413	0.009121	0.009188	0.009107	0.009261	0.009264	0.009336	0.00936
1494.83	0.009023	0.009225	0.008975	0.009036	0.009637	0.009935	0.009924	0.009764	0.009887	0.009834	0.00984	0.00985
1496.76	0.009025	0.009202	0.009416	0.008985	0.010112	0.010004	0.009854	0.009738	0.009608	0.009572	0.009476	0.009398
1498.69	0.00965	0.009355	0.00895	0.009105	0.009605	0.010012	0.009699	0.00975	0.009624	0.009618	0.009672	0.009381
1500.62	0.010247	0.01043	0.010388	0.010645	0.011833	0.011759	0.011715	0.011511	0.011891	0.011864	0.011966	0.011832
1502.55	0.009853	0.011016	0.012546	0.011442	0.014466	0.012683	0.012736	0.01224	0.012636	0.012488	0.012079	0.012201
1504.48	0.009682	0.011157	0.013553	0.011438	0.015331	0.012666	0.012625	0.012069	0.012081	0.011837	0.011002	0.011208
1506.41	0.010169	0.01083	0.012345	0.010518	0.013005	0.011476	0.011242	0.010906	0.010348	0.010074	0.009255	0.009423
1508.33	0.011834	0.011125	0.010633	0.010287	0.010485	0.011036	0.010697	0.01068	0.009765	0.009613	0.009258	0.009185
1510.26	0.013303	0.011999	0.010099	0.011176	0.010181	0.011906	0.011633	0.011744	0.011068	0.011074	0.011238	0.010895
1512.19	0.012355	0.011501	0.009494	0.011015	0.010042	0.011596	0.011353	0.011511	0.011297	0.011361	0.011607	0.011211
1514.12	0.010221	0.01052	0.009982	0.010615	0.011526	0.011402	0.011501	0.011432	0.011501	0.011601	0.011617	0.011316
1516.05	0.006164	0.007268	0.008055	0.007268	0.009551	0.007809	0.008207	0.007792	0.007551	0.007543	0.007163	0.007061
1517.98	0.003412	0.004291	0.005007	0.004107	0.006056	0.004376	0.004786	0.00429	0.003975	0.003906	0.003479	0.003639
1519.91	0.003056	0.00326	0.003481	0.002933	0.004145	0.003181	0.003431	0.002957	0.002732	0.002536	0.002304	0.002577
1521.84	0.004013	0.003588	0.003322	0.003113	0.003687	0.003343	0.003317	0.00295	0.002894	0.002599	0.002521	0.002691
1523.76	0.005212	0.004212	0.003451	0.003525	0.003258	0.00368	0.003229	0.003234	0.003165	0.002838	0.002694	0.002701
1525.69	0.007466	0.005957	0.004452	0.005158	0.004248	0.005586	0.004893	0.005229	0.005306	0.005029	0.004928	0.004541
1527.62	0.00877	0.007721	0.006541	0.007368	0.007082	0.008045	0.007874	0.007961	0.00829	0.00819	0.00828	0.007644
1529.55	0.006945	0.006598	0.006187	0.006309	0.006396	0.006635	0.006699	0.006589	0.006618	0.006674	0.006378	0.006176
1531.48	0.008135	0.007696	0.007032	0.007311	0.007573	0.007927	0.007474	0.007538	0.007977	0.008095	0.00762	0.007552
1533.41	0.009175	0.00946	0.009252	0.009509	0.011325	0.011166	0.011056	0.010158	0.011384	0.011161	0.010738	0.011366
1535.34	0.00422	0.005507	0.00611	0.005732	0.007779	0.006666	0.007106	0.005761	0.006684	0.00617	0.005542	0.006989
1537.27	-0.000526	0.000894	0.002048	0.001325	0.003034	0.00138	0.002222	0.001077	0.001364	0.00081	0.000427	0.001928
1539.2	-0.004805	-0.004005	-0.002457	-0.003735	-0.002685	-0.004569	-0.003765	-0.004389	-0.004572	-0.004954	-0.00507	-0.004382
1541.12	-0.007718	-0.008226	-0.007375	-0.008535	-0.009016	-0.009958	-0.009864	-0.00944	-0.010212	-0.010275	-0.010269	-0.010648
1543.05	-0.005697	-0.007663	-0.008523	-0.00858	-0.010227	-0.009292	-0.010037	-0.008866	-0.009542	-0.009432	-0.009298	-0.010405
1544.98	-0.0025	-0.004862	-0.006818	-0.00589	-0.007127	-0.005234	-0.006179	-0.005159	-0.005112	-0.00506	-0.004756	-0.006071
1546.91	-0.002338	-0.003721	-0.005328	-0.004109	-0.004139	-0.002542	-0.00281	-0.002596	-0.002287	-0.002406	-0.002148	-0.002674
1548.84	-0.006042	-0.00624	-0.006777	-0.006043	-0.005492	-0.005016	-0.004756	-0.004623	-0.004786	-0.004856	-0.004832	-0.004692
1550.77	-0.006566	-0.006258	-0.006098	-0.005606	-0.003956	-0.004446	-0.004233	-0.004049	-0.003966	-0.003982	-0.003886	-0.003739
1552.7	-0.006982	-0.005476	-0.004155	-0.004457	-0.001769	-0.003055	-0.002736	-0.002872	-0.002446	-0.002536	-0.00241	-0.00188
1554.63	-0.010595	-0.008656	-0.007017	-0.007762	-0.006289	-0.007192	-0.006838	-0.006932	-0.006995	-0.007058	-0.007026	-0.006058
1556.55	-0.012093	-0.0108	-0.009698	-0.010232	-0.010377	-0.010431	-0.010019	-0.010005	-0.010466	-0.010493	-0.010377	-0.009444
1558.48	-0.01188	-0.011819	-0.011775	-0.011688	-0.013451	-0.012517	-0.012149	-0.01179	-0.012647	-0.012464	-0.012261	-0.011834
1560.41	-0.008882	-0.010076	-0.011189	-0.010094	-0.012864	-0.010936	-0.010792	-0.010065	-0.010988	-0.01057	-0.010284	-0.010364
1562.34	-0.004565	-0.006148	-0.007633	-0.006004	-0.007876	-0.005993	-0.005999	-0.005264	-0.005701	-0.005352	-0.004908	-0.005352
1564.27	-0.001273	-0.00205	-0.002975	-0.00172	-0.002097	-0.001124	-0.001096	-0.000606	-0.000458	-0.00031	0.000202	-0.000248
1566.2	-0.001803	-0.001348	-0.001079	-0.000898	-0.000752	-0.000511	-0.000194	-0.000122	-8.2e-05	-2.5e-05	0.000306	0.000489
1568.13	-0.003633	-0.00335	-0.003156	-0.00315	-0.003899	-0.003566	-0.003423	-0.003238	-0.003442	-0.003355	-0.003243	-0.002989
1570.06	-0.001824	-0.001398	-0.001371	-0.001043	-0.001435	-0.001333	-0.00113	-0.000977	-0.000973	-0.000838	-0.000578	-0.000433
1571.99	-0.001903	-0.001225	-0.001012	-0.000898	-0.001442	-0.001548	-0.001302	-0.001152	-0.001233	-0.00094	-0.00076	-0.000586
1573.91	-0.001934	-0.001569	-0.001482	-0.001369	-0.002377	-0.002197	-0.002039	-0.001801	-0.001986	-0.001632	-0.001523	-0.001368
1575.84	-0.001404	-0.001424	-0.001512	-0.001263	-0.00255	-0.001953	-0.001757	-0.001506	-0.0017	-0.001424	-0.001239	-0.001188
1577.77	-0.001843	-0.002287	-0.002464	-0.002211	-0.004176	-0.003132	-0.002949	-0.002621	-0.002975	-0.002743	-0.002545	-0.002543
1579.7	-0.000852	-0.001855	-0.00235	-0.001745	-0.003968	-0.002451	-0.002407	-0.002051	-0.002338	-0.002125	-0.001833	-0.00197
1581.63	0.000709	-5.8e-05	-0.000532	0.000279	-0.001261	3.8e-05	0.000143	0.000348	0.000337	0.000502	0.000902	0.000721
1583.56	0.000578	0.00064	0.000665	0.001044	0.000318	0.000872	0.001058	0.001151	0.001093	0.001265	0.001554	0.0016
1585.49	0.00017	0.000465	0.000699	0.000631	0.000198	0.000385	0.000371	0.000501	0.000342	0.000453	0.000583	0.000759
1587.42	0.000973	0.001185	0.001387	0.001276	0.001222	0.001224	0.001147	0.001271	0.001169	0.001141	0.001301	0.001497
1589.34	0.001545	0.001715	0.001957	0.001793	0.002063	0.001776	0.001801	0.001833	0.001758	0.001688	0.001817	0.001977
1591.27	0.001915	0.00199	0.002163	0.00196	0.002269	0.001831	0.001927	0.001884	0.001852	0.001802	0.001838	0.001874
1593.2	0.002428	0.002347	0.002268	0.002171	0.002291	0.00199	0.002067	0.002018	0.001995	0.001993	0.001946	0.001899
1595.13	0.003092	0.002932	0.00265	0.00266	0.002723	0.002609	0.002617	0.002556	0.002535	0.002544	0.002422	0.002401
1597.06	0.003588	0.003462	0.00322	0.003135	0.003353	0.003212	0.003129	0.003021	0.003071	0.002998	0.00278	0.002846
1598.99	0.004045	0.003875	0.003709	0.003534	0.003895	0.003608	0.00344	0.003316	0.003483	0.003258	0.003035	0.003076
1600.92	0.004601	0.004432	0.004366	0.004193	0.00475	0.004244	0.004082	0.003931	0.004208	0.003892	0.00369	0.003707
1602.85	0.004987	0.004923	0.004977	0.004736	0.005432	0.004664	0.00447	0.004326	0.004644	0.004334	0.004064	0.004066
1604.77	0.005373	0.005276	0.005244	0.004988	0.005454	0.004697	0.004358	0.004313	0.004579	0.004325	0.004041	0.003947
1606.7	0.006199	0.005861	0.005591	0.005363	0.005613	0.005087	0.004553	0.004609	0.004687	0.004507	0.004241	0.004075
1608.63	0.007887	0.007411	0.006949	0.006818	0.007415	0.006977	0.006314	0.006359	0.006495	0.006373	0.006097	0.005854
1610.56	0.008891	0.008808	0.008637	0.008427	0.009608	0.00875	0.0084	0.008227	0.008528	0.008204	0.007883	0.007795
1612.49	0.008471	0.008611	0.00881	0.008276	0.00947	0.008305	0.008196	0.007919	0.007964	0.007471	0.006974	0.007059
1614.42	0.008953	0.008914	0.009134	0.008509	0.009564	0.008478	0.008359	0.008055	0.007867	0.007478	0.006813	0.006898
1616.35	0.010193	0.010055	0.010302	0.009716	0.01079	0.009747	0.009707	0.009256	0.009033	0.008836	0.008235	0.008233
1618.28	0.010389	0.010162	0.010409	0.009755	0.01034	0.009528	0.009485	0.009032	0.008603	0.008571	0.008124	0.008125
1620.21	0.010939	0.010578	0.01056	0.01007	0.010238	0.009915	0.009695	0.009409	0.008936	0.008941	0.008795	0.008761
1622.13	0.010662	0.010592	0.010452	0.010206	0.010136	0.010038	0.009908	0.009769	0.009345	0.009494	0.00959	0.009456
1624.06	0.007791	0.007973	0.007892	0.007685	0.006842	0.006988	0.007045	0.00716	0.006396	0.006668	0.006721	0.006622
1625.99	0.005359	0.004991	0.004587	0.004622	0.003147	0.003847	0.00359	0.004067	0.00312	0.003439	0.003322	0.003094
1627.92	0.006561	0.005708	0.004997	0.005598	0.005096	0.005941	0.00554	0.005863	0.005626	0.005765	0.005721	0.005317
1629.85	0.005191	0.005356	0.00561	0.005617	0.00672	0.006588	0.006958	0.006593	0.006714	0.006393	0.006465	0.006599
1631.78	0.000638	0.001676	0.002873	0.001869	0.003236	0.002266	0.002923	0.002321	0.002293	0.001567	0.001482	0.002155
1633.71	-0.001286	-0.000303	0.000831	-0.000304	0.000549	-0.000393	4.7e-05	-0.000472	-0.000561	-0.001239	-0.001412	-0.000811
1635.64	-0.001786	-0.00143	-0.000986	-0.001637	-0.002046	-0.002397	-0.002295	-0.002444	-0.002847	-0.002983	-0.003235	-0.003055
1637.56	7.9e-05	-0.000807	-0.001432	-0.001087	-0.002624	-0.002012	-0.002513	-0.002145	-0.002682	-0.002397	-0.002532	-0.002891
1639.49	0.005285	0.003765	0.002746	0.0039	0.003287	0.004077	0.003584	0.003795	0.00377	0.0039	0.004298	0.003736
1641.42	0.005348	0.00521	0.005249	0.00556	0.006322	0.005869	0.006159	0.005701	0.006353	0.006007	0.006494	0.006477
1643.35	-0.00026	0.001151	0.002347	0.001266	0.0021	0.000541	0.001239	0.000678	0.001139	0.000626	0.000722	0.001245
1645.28	-0.000114	0.000971	0.001871	0.000879	0.001279	-1e-05	7.6e-05	-3.6e-05	0.000677	0.000362	-0.000194	0.000183
1647.21	-0.000132	0.001234	0.001763	0.001073	0.00043	-0.000157	0.000179	-0.000154	0.000864	0.000908	-0.000127	0.000284
1649.14	-0.004065	-0.002804	-0.002601	-0.003067	-0.005239	-0.005027	-0.004745	-0.005021	-0.004403	-0.00404	-0.004759	-0.004779
1651.07	-0.00532	-0.004995	-0.005231	-0.005165	-0.008063	-0.007013	-0.007134	-0.007141	-0.006831	-0.006349	-0.006303	-0.006865
1653	-0.005237	-0.00582	-0.006249	-0.005814	-0.008482	-0.007023	-0.007374	-0.007159	-0.006942	-0.006531	-0.005832	-0.00654
1654.92	-0.005828	-0.006925	-0.007417	-0.006828	-0.009091	-0.00766	-0.008337	-0.007781	-0.007494	-0.007026	-0.006247	-0.006954
1656.85	-0.004575	-0.006072	-0.006775	-0.005767	-0.007047	-0.00576	-0.006577	-0.005786	-0.005396	-0.004849	-0.004181	-0.004807
1658.78	-0.004677	-0.005675	-0.006223	-0.00516	-0.005603	-0.004791	-0.005067	-0.004601	-0.003769	-0.00334	-0.003019	-0.003161
1660.71	-0.010089	-0.009735	-0.009695	-0.009242	-0.009958	-0.009652	-0.009152	-0.009213	-0.008344	-0.008113	-0.007969	-0.00772
1662.64	-0.013043	-0.012317	-0.011962	-0.011841	-0.012313	-0.012215	-0.011888	-0.011917	-0.011211	-0.011231	-0.010876	-0.010814
1664.57	-0.013735	-0.012823	-0.012096	-0.012275	-0.012374	-0.012572	-0.012384	-0.012422	-0.011788	-0.011859	-0.011636	-0.011559
1666.5	-0.014157	-0.013394	-0.012614	-0.012862	-0.012844	-0.013201	-0.013171	-0.013085	-0.012617	-0.01259	-0.012526	-0.012507
1668.43	-0.012912	-0.012203	-0.011521	-0.011623	-0.011335	-0.011914	-0.01174	-0.011683	-0.011293	-0.011158	-0.011152	-0.011038
1670.35	-0.014704	-0.014207	-0.013764	-0.013929	-0.014351	-0.014857	-0.014532	-0.01446	-0.014347	-0.014172	-0.014171	-0.013941
1672.28	-0.014255	-0.014626	-0.014917	-0.014648	-0.016087	-0.015689	-0.015581	-0.015339	-0.015387	-0.015103	-0.014887	-0.014892
1674.21	-0.011522	-0.012351	-0.012843	-0.012357	-0.013737	-0.012735	-0.012873	-0.012629	-0.012648	-0.012374	-0.011906	-0.012086
1676.14	-0.009586	-0.010007	-0.009996	-0.00979	-0.010114	-0.009515	-0.009742	-0.009726	-0.009414	-0.009402	-0.008845	-0.008993
1678.07	-0.010909	-0.010174	-0.00918	-0.009687	-0.009128	-0.009785	-0.009691	-0.010084	-0.009524	-0.0097	-0.009456	-0.009325
1680	-0.013593	-0.012339	-0.011092	-0.01189	-0.011435	-0.012601	-0.012428	-0.012724	-0.012307	-0.012524	-0.012627	-0.012382
1681.93	-0.014699	-0.01361	-0.012593	-0.013225	-0.013284	-0.014314	-0.014061	-0.014199	-0.01405	-0.014131	-0.014332	-0.014142
1683.86	-0.016009	-0.015767	-0.015366	-0.015658	-0.016923	-0.017165	-0.01706	-0.017017	-0.017167	-0.017041	-0.017152	-0.017289
1685.79	-0.014271	-0.015177	-0.015772	-0.015276	-0.017589	-0.01658	-0.016781	-0.016476	-0.01683	-0.016519	-0.016412	-0.016848
1687.71	-0.011057	-0.012623	-0.013896	-0.012717	-0.015162	-0.013457	-0.013893	-0.013484	-0.013647	-0.013291	-0.013025	-0.013579
1689.64	-0.008641	-0.00961	-0.010552	-0.009403	-0.010705	-0.009616	-0.009813	-0.009657	-0.009501	-0.009299	-0.008994	-0.00931
1691.57	-0.011347	-0.010897	-0.010538	-0.010418	-0.0104	-0.010948	-0.010833	-0.010881	-0.010856	-0.010828	-0.010745	-0.010545
1693.5	-0.013531	-0.012392	-0.011217	-0.011807	-0.011122	-0.012716	-0.012618	-0.012592	-0.012681	-0.012711	-0.012765	-0.012482
1695.43	-0.015039	-0.013968	-0.01248	-0.013419	-0.012862	-0.014775	-0.014586	-0.014623	-0.014854	-0.014819	-0.014962	-0.014682
1697.36	-0.015751	-0.015411	-0.014456	-0.015197	-0.0157	-0.01689	-0.016831	-0.01682	-0.017207	-0.017136	-0.017309	-0.017092
1699.29	-0.014161	-0.014644	-0.014605	-0.014685	-0.016228	-0.016351	-0.016472	-0.016299	-0.016767	-0.016674	-0.01675	-0.016668
1701.22	-0.010965	-0.011987	-0.012636	-0.012124	-0.014219	-0.013713	-0.013956	-0.013687	-0.013997	-0.013885	-0.01385	-0.013928
1703.14	-0.00843	-0.009476	-0.010237	-0.009627	-0.011813	-0.011216	-0.011439	-0.011214	-0.011419	-0.011327	-0.011245	-0.011331
1705.07	-0.006437	-0.007427	-0.008207	-0.007639	-0.009928	-0.009391	-0.009685	-0.00948	-0.009438	-0.009397	-0.009358	-0.00945
1707	-0.003986	-0.004864	-0.005629	-0.005045	-0.007322	-0.00673	-0.006933	-0.006897	-0.006536	-0.006524	-0.006498	-0.006589
1708.93	-0.004267	-0.004756	-0.005023	-0.00494	-0.006673	-0.006292	-0.006564	-0.006609	-0.006297	-0.006334	-0.006384	-0.006369
1710.86	-0.003783	-0.003292	-0.002568	-0.003216	-0.003116	-0.00381	-0.004031	-0.004225	-0.003782	-0.003918	-0.004083	-0.003944
1712.79	-0.004746	-0.003493	-0.001988	-0.003179	-0.002021	-0.003754	-0.00372	-0.004025	-0.003624	-0.003746	-0.004072	-0.003828
1714.72	-0.005322	-0.004565	-0.003554	-0.004369	-0.004017	-0.005301	-0.005247	-0.005412	-0.005182	-0.005208	-0.005498	-0.005347
1716.65	-0.004408	-0.004745	-0.004886	-0.004825	-0.005958	-0.005917	-0.005921	-0.00595	-0.005752	-0.005699	-0.005789	-0.00585
1718.58	-0.003144	-0.004421	-0.005579	-0.00476	-0.007167	-0.005913	-0.006029	-0.005925	-0.005705	-0.005623	-0.005522	-0.005772
1720.5	-0.001784	-0.00343	-0.005098	-0.003865	-0.006731	-0.004838	-0.00508	-0.004892	-0.00459	-0.004564	-0.004275	-0.004665
1722.43	-0.001063	-0.002196	-0.003398	-0.002513	-0.004574	-0.003162	-0.003411	-0.003317	-0.002832	-0.002896	-0.002607	-0.00299
1724.36	-0.001074	-0.001302	-0.001457	-0.001407	-0.002067	-0.001918	-0.00205	-0.002108	-0.00148	-0.00154	-0.001501	-0.001682
1726.29	-0.001147	-0.000795	-0.000305	-0.000797	-0.000623	-0.001374	-0.001491	-0.001595	-0.000816	-0.000856	-0.001002	-0.001069
1728.22	-0.00123	-0.000279	0.00078	-0.000204	0.000811	-0.000757	-0.000742	-0.000992	-7.2e-05	-9.7e-05	-0.000388	-0.000397
1730.15	-0.001563	-0.000511	0.000602	-0.000493	0.000426	-0.00118	-0.001109	-0.001352	-0.000439	-0.000433	-0.000798	-0.000737
1732.08	-0.001512	-0.000992	-0.000473	-0.001061	-0.001095	-0.001919	-0.001875	-0.002014	-0.001144	-0.001106	-0.001368	-0.001377
1734.01	-0.001892	-0.002021	-0.002297	-0.002118	-0.003262	-0.003072	-0.003011	-0.003011	-0.002371	-0.00231	-0.00237	-0.00247
1735.93	-0.002722	-0.003267	-0.003984	-0.00338	-0.005026	-0.004112	-0.004066	-0.003949	-0.003663	-0.003599	-0.003533	-0.003652
1737.86	-0.004076	-0.00461	-0.005043	-0.004695	-0.005726	-0.004856	-0.004827	-0.004714	-0.004875	-0.004806	-0.004747	-0.004837
1739.79	-0.005612	-0.005869	-0.005776	-0.005851	-0.005723	-0.005393	-0.005323	-0.005276	-0.005904	-0.005839	-0.005808	-0.005846
1741.72	-0.007216	-0.006991	-0.006277	-0.006845	-0.005541	-0.005919	-0.005744	-0.00578	-0.006885	-0.006814	-0.00685	-0.006762
1743.65	-0.007858	-0.007487	-0.006586	-0.00732	-0.005585	-0.006124	-0.006034	-0.005995	-0.007389	-0.007369	-0.007406	-0.00722
1745.58	-0.007556	-0.007147	-0.006226	-0.006933	-0.005156	-0.005724	-0.005579	-0.005602	-0.006977	-0.006991	-0.007	-0.006813
1747.51	-0.007211	-0.007089	-0.006682	-0.006944	-0.006051	-0.006031	-0.005851	-0.005793	-0.007227	-0.007226	-0.00717	-0.006977
1749.44	-0.005903	-0.006355	-0.006775	-0.006354	-0.006689	-0.00573	-0.005613	-0.005447	-0.006782	-0.006736	-0.006568	-0.006505
1751.36	-0.004689	-0.005419	-0.006155	-0.005495	-0.006325	-0.005005	-0.004923	-0.004785	-0.005949	-0.005839	-0.005649	-0.005691
1753.29	-0.003621	-0.004392	-0.00523	-0.004472	-0.005348	-0.004067	-0.004053	-0.003864	-0.00488	-0.004748	-0.004574	-0.004606
1755.22	-0.002974	-0.003289	-0.00368	-0.003242	-0.003423	-0.002823	-0.002791	-0.002655	-0.003457	-0.003344	-0.003261	-0.003259
1757.15	-0.002817	-0.002657	-0.002471	-0.002535	-0.002045	-0.002146	-0.002067	-0.002041	-0.002659	-0.002573	-0.002624	-0.00253
1759.08	-0.002495	-0.002407	-0.002297	-0.002342	-0.002074	-0.002127	-0.002038	-0.002015	-0.002529	-0.00245	-0.002504	-0.002406
1761.01	-0.001948	-0.002147	-0.002391	-0.002182	-0.002402	-0.002089	-0.002033	-0.001965	-0.002414	-0.002371	-0.002328	-0.002331
1762.94	-0.001395	-0.00168	-0.001925	-0.001781	-0.001987	-0.001656	-0.001651	-0.001603	-0.001947	-0.001953	-0.00188	-0.001945
1764.87	-0.001366	-0.001336	-0.001221	-0.001377	-0.001017	-0.001141	-0.001162	-0.001154	-0.00144	-0.001456	-0.001459	-0.001485
1766.8	-0.001732	-0.001133	-0.000593	-0.001006	2.8e-05	-0.000772	-0.000718	-0.000734	-0.000973	-0.000967	-0.001108	-0.001033
1768.72	-0.00196	-0.001079	-0.000347	-0.000878	0.000397	-0.000714	-0.00058	-0.000663	-0.000818	-0.000797	-0.001033	-0.000911
1770.65	-0.001669	-0.001199	-0.000874	-0.001142	-0.000554	-0.001092	-0.001016	-0.00108	-0.001191	-0.001179	-0.001349	-0.001253
1772.58	-0.000822	-0.001159	-0.001522	-0.001319	-0.001727	-0.001337	-0.001353	-0.001354	-0.001446	-0.001459	-0.001451	-0.001501
1774.51	-0.000128	-0.000935	-0.001506	-0.001219	-0.00195	-0.001186	-0.001229	-0.001293	-0.001324	-0.001373	-0.001224	-0.001403
1776.44	9.1e-05	-0.000781	-0.001306	-0.001063	-0.001736	-0.000985	-0.00107	-0.001143	-0.001152	-0.001236	-0.001041	-0.001209
1778.37	-0.000146	-0.000647	-0.000911	-0.000785	-0.001049	-0.000685	-0.000735	-0.000816	-0.00082	-0.000892	-0.000772	-0.000876
1780.3	-0.000564	-0.000671	-0.000676	-0.00072	-0.000687	-0.000677	-0.000672	-0.000738	-0.000748	-0.000799	-0.0008	-0.000791
1782.23	-0.000513	-0.000726	-0.000937	-0.000833	-0.00113	-0.000877	-0.000908	-0.000877	-0.000931	-0.000959	-0.000958	-0.00095
1784.15	-0.000377	-0.000663	-0.000945	-0.000772	-0.001116	-0.000808	-0.000858	-0.000774	-0.000881	-0.000867	-0.000831	-0.000894
1786.08	-0.000618	-0.000503	-0.000332	-0.000475	-0.000107	-0.000469	-0.000406	-0.000412	-0.000491	-0.000452	-0.000493	-0.000552
1788.01	-0.000984	-0.000436	0.000181	-0.000291	0.000677	-0.000287	-0.000131	-0.000238	-0.000252	-0.000207	-0.000346	-0.000335
1789.94	-0.000949	-0.000431	0.000239	-0.000287	0.000698	-0.000266	-0.000156	-0.000266	-0.000256	-0.00022	-0.000404	-0.000334
1791.87	-0.000636	-0.000436	-8.6e-05	-0.000403	9.5e-05	-0.000379	-0.000379	-0.000424	-0.000415	-0.000407	-0.000553	-0.000468
1793.8	-0.00039	-0.000483	-0.000636	-0.000586	-0.00082	-0.000608	-0.000705	-0.000653	-0.000679	-0.000694	-0.00073	-0.000678
1795.73	-0.000133	-0.000449	-0.000825	-0.0006	-0.001147	-0.000634	-0.000754	-0.000671	-0.000732	-0.00073	-0.000662	-0.000686
1797.66	-4e-05	-0.000385	-0.00068	-0.000488	-0.000912	-0.000512	-0.000595	-0.000546	-0.000597	-0.000597	-0.000486	-0.000546
1799.59	-0.000218	-0.000414	-0.000648	-0.00046	-0.000808	-0.000553	-0.000544	-0.00054	-0.000557	-0.000571	-0.000499	-0.000523
1801.51	-0.000191	-0.000456	-0.000829	-0.000534	-0.001076	-0.000668	-0.000666	-0.000627	-0.000653	-0.000665	-0.000623	-0.000629
1803.44	-0.000131	-0.000405	-0.000793	-0.000494	-0.000998	-0.000583	-0.00062	-0.000547	-0.000591	-0.000599	-0.000598	-0.000614
1805.37	-0.000304	-0.000329	-0.000521	-0.000373	-0.000567	-0.000418	-0.000444	-0.000389	-0.000427	-0.000413	-0.000468	-0.000486
1807.3	-0.000442	-0.000246	-0.000168	-0.00024	-0.000101	-0.000235	-0.000235	-0.000247	-0.000274	-0.000231	-0.000305	-0.000318
1809.23	-0.000321	-0.00021	-9.2e-05	-0.000197	-5.3e-05	-0.000206	-0.000185	-0.000234	-0.000258	-0.000213	-0.00024	-0.000242
1811.16	-0.000145	-0.000232	-0.000358	-0.000273	-0.0005	-0.00033	-0.000324	-0.000351	-0.00036	-0.000376	-0.000326	-0.000324
1813.09	-5.2e-05	-0.000248	-0.000585	-0.00034	-0.000858	-0.000427	-0.000429	-0.000428	-0.000441	-0.00049	-0.000401	-0.000415
1815.02	-5e-06	-0.000245	-0.000619	-0.000347	-0.000866	-0.000429	-0.000445	-0.00039	-0.000455	-0.000467	-0.000389	-0.000404
1816.94	-8.7e-05	-0.000212	-0.000391	-0.000251	-0.000459	-0.000274	-0.000292	-0.000232	-0.000314	-0.000298	-0.000282	-0.000291
1818.87	-0.00026	-0.000137	9.4e-05	-6.7e-05	0.000269	-2.4e-05	8e-06	-2.7e-05	-6.9e-05	-3.4e-05	-9.2e-05	-9.8e-05
1820.8	-0.000272	-0.000115	0.00022	-6e-06	0.000448	2.1e-05	3.2e-05	2.5e-05	-3.4e-05	1.1e-05	-5.7e-05	-2.5e-05
1822.73	-0.000373	-8.3e-05	0.000292	5.6e-05	0.000577	8.1e-05	8.5e-05	9.4e-05	5.5e-05	7.5e-05	-1.1e-05	2.6e-05
1824.66	-0.000603	-5.4e-05	0.000498	0.000104	0.000796	0.000136	0.000181	0.000129	0.000156	0.000141	3.4e-05	8.6e-05
1826.59	-0.000486	-9.8e-05	0.000217	-3.6e-05	0.000302	-6.2e-05	-1.1e-05	-4.9e-05	-2.5e-05	-5.1e-05	-9e-05	-4.1e-05
1828.52	-0.000112	-0.000158	-0.000286	-0.000224	-0.000455	-0.000297	-0.000266	-0.000271	-0.000263	-0.000296	-0.000245	-0.000227
1830.45	0.00021	-0.000168	-0.000524	-0.000286	-0.0008	-0.000334	-0.000337	-0.000345	-0.000337	-0.000393	-0.000282	-0.000308
1832.38	0.000318	-0.000162	-0.000543	-0.000273	-0.000816	-0.000312	-0.000323	-0.000336	-0.000344	-0.00038	-0.000263	-0.000321
1834.3	0.000323	-0.000183	-0.000636	-0.000275	-0.00089	-0.000336	-0.000407	-0.000335	-0.000399	-0.00039	-0.000296	-0.000322
1836.23	7.9e-05	-0.000105	-0.00029	-0.000113	-0.000327	-0.000118	-0.000174	-0.000132	-0.000185	-0.000167	-0.000142	-0.000164
1838.16	-0.000283	1.4e-05	0.000371	0.000128	0.000615	0.000157	0.000199	0.000151	0.000122	0.000175	0.000107	0.000115
1840.09	-0.000341	8.1e-05	0.000644	0.000213	0.000958	0.000265	0.000307	0.00025	0.000218	0.000298	0.000193	0.000244
1842.02	-0.0003	0.000104	0.00066	0.000179	0.000884	0.000277	0.000289	0.000208	0.000212	0.000261	0.000173	0.000217
1843.95	-0.000181	1.4e-05	0.000275	0	0.000257	6.4e-05	2.9e-05	-9e-06	1e-05	3e-06	-2e-05	9e-06
1845.88	2e-05	-0.000158	-0.000461	-0.000265	-0.00078	-0.000332	-0.000398	-0.000342	-0.000343	-0.00038	-0.000334	-0.000324
1847.81	0.000196	-0.00028	-0.001058	-0.000439	-0.001525	-0.000629	-0.000693	-0.000551	-0.000616	-0.000634	-0.000545	-0.000543
1849.73	0.00018	-0.000265	-0.001046	-0.000376	-0.00138	-0.00059	-0.000598	-0.000458	-0.000573	-0.000553	-0.000472	-0.000489
1851.66	-9e-06	-0.000179	-0.00057	-0.000175	-0.000667	-0.000335	-0.000287	-0.000212	-0.000325	-0.000269	-0.000232	-0.000249
1853.59	-6.2e-05	-7.2e-05	-0.000125	-3.3e-05	-0.000115	-7.9e-05	-6.2e-05	-4.1e-05	-0.000104	-6.9e-05	-4.9e-05	-6.2e-05
1855.52	-4.4e-05	2e-05	0.000179	4.9e-05	0.000219	9.6e-05	8.7e-05	4.9e-05	7e-05	5.4e-05	6.4e-05	2.8e-05
1857.45	-1.7e-05	7e-06	0.000135	2.8e-05	0.000149	6.1e-05	4.7e-05	3e-06	6.1e-05	2.7e-05	3e-05	4e-06
1859.38	-3e-06	-1.7e-05	-2.9e-05	-2.1e-05	-3.1e-05	-8e-06	-4.4e-05	-6e-05	-1.2e-05	-4.3e-05	-3.8e-05	-3.8e-05
1861.31	-0.000165	4.8e-05	0.000175	5.9e-05	0.000332	0.000122	8.5e-05	7.6e-05	9.4e-05	9.1e-05	3.5e-05	5.2e-05
1863.24	-0.000411	0.000132	0.000691	0.000244	0.001119	0.00037	0.000378	0.000338	0.000342	0.000367	0.000225	0.000255
1865.17	-0.000414	0.000152	0.000879	0.000301	0.001319	0.000434	0.000456	0.000404	0.000408	0.000444	0.000292	0.000346
1867.09	-0.000158	8.2e-05	0.000473	0.000149	0.00064	0.000195	0.000224	0.000192	0.000193	0.000229	0.00015	0.000212
1869.02	0.000192	-5.1e-05	-0.000275	-0.000103	-0.000503	-0.00021	-0.00018	-0.000153	-0.000182	-0.000145	-0.000102	-6.2e-05
1870.95	0.000445	-0.000163	-0.000918	-0.000309	-0.001429	-0.00053	-0.00051	-0.000418	-0.000495	-0.000468	-0.000296	-0.000308
1872.88	0.000465	-0.000151	-0.00096	-0.000312	-0.001463	-0.000501	-0.000497	-0.00041	-0.000483	-0.000484	-0.000284	-0.000334
1874.81	0.000238	-4.2e-05	-0.000408	-0.000114	-0.000629	-0.000179	-0.000166	-0.000146	-0.000184	-0.000191	-9.7e-05	-0.000145
1876.74	3e-05	2.8e-05	7.7e-05	6.2e-05	0.000105	6.5e-05	8.3e-05	6.1e-05	6e-05	4.8e-05	6.4e-05	3.5e-05
1878.67	-2.6e-05	3e-05	0.000147	8.2e-05	0.000215	0.000101	0.0001	7.3e-05	9.2e-05	7.7e-05	6.5e-05	7.2e-05
1880.6	-2.6e-05	7e-06	4.5e-05	4.3e-05	0.000108	4.5e-05	4.3e-05	5e-05	4.2e-05	3.8e-05	2e-05	4.6e-05
1882.52	-6e-05	2.8e-05	0.000111	6.8e-05	0.000196	7.5e-05	7.3e-05	9.6e-05	7.6e-05	7.7e-05	5.6e-05	6.1e-05
1884.45	-0.000155	7.4e-05	0.000319	9.9e-05	0.000421	0.000151	0.000158	0.000137	0.000151	0.000134	0.000106	0.00011
1886.38	-0.000127	8.2e-05	0.000302	6.4e-05	0.000339	0.000132	0.000116	9.4e-05	0.000121	9.4e-05	7.1e-05	0.000109
1888.31	-6e-05	6.6e-05	0.000179	3.8e-05	0.000187	7.6e-05	5.2e-05	5.4e-05	5.9e-05	5.2e-05	3.4e-05	8.4e-05
1890.24	-1.7e-05	3.3e-05	5.9e-05	2.3e-05	8.5e-05	1.4e-05	1.6e-05	2.1e-05	-1.2e-05	2.1e-05	9e-06	4e-05
1892.17	4.6e-05	-1.8e-05	-0.000125	-2e-05	-0.000136	-6.8e-05	-5e-05	-4.6e-05	-0.000112	-4.8e-05	-5e-05	-5e-05
1894.1	0.0001	-6.3e-05	-0.000308	-6.3e-05	-0.000386	-0.000149	-0.000149	-0.000108	-0.000189	-0.000127	-0.000105	-0.000137
1896.03	5.2e-05	-5.6e-05	-0.000268	-6.1e-05	-0.000372	-0.000124	-0.000141	-0.000103	-0.000151	-0.000123	-9.6e-05	-0.000133
1897.95	-2.9e-05	-5.7e-05	-0.000214	-8.4e-05	-0.000328	-0.000125	-0.000141	-0.000108	-0.000136	-0.000146	-0.000112	-0.000107
1899.88	-1.8e-05	-6.8e-05	-0.000253	-9.6e-05	-0.000344	-0.00014	-0.000166	-0.000106	-0.000145	-0.000154	-0.000125	-9.3e-05
1901.81	-5.6e-05	-1.1e-05	-1.7e-05	6e-06	3.8e-05	0	-2e-06	1.8e-05	-1e-05	1e-06	-7e-06	2e-05
1903.74	-0.000111	4.3e-05	0.00027	0.000111	0.000462	0.000153	0.000156	0.000142	0.000117	0.000153	0.000104	0.000122
1905.67	-9.4e-05	4.2e-05	0.000279	0.000116	0.000448	0.000156	0.000132	0.000127	0.00011	0.000151	8.6e-05	9.4e-05
1907.6	-2.9e-05	9e-06	0.000102	5.2e-05	0.000157	4.3e-05	1.7e-05	2.1e-05	1.7e-05	5.7e-05	-5e-06	3e-05
1909.53	4.4e-05	-3e-05	-0.000144	-3.9e-05	-0.000198	-7.9e-05	-9.9e-05	-8.2e-05	-9.6e-05	-7.2e-05	-0.0001	-5e-05
1911.46	-2.9e-05	-2.6e-05	-0.000146	-5.8e-05	-0.000201	-7.3e-05	-4.7e-05	-7.4e-05	-6.6e-05	-7.8e-05	-6.8e-05	-7e-05
1913.39	-0.000115	-1.2e-05	-1.6e-05	-2.8e-05	-2.2e-05	-5e-06	2.4e-05	-6e-06	1e-05	-1.5e-05	4e-06	-5e-06
1915.31	-0.000104	4.3e-05	0.000223	6.4e-05	0.000324	0.000148	0.000157	0.000125	0.00014	0.00011	0.000118	0.000112
1917.24	-9.2e-05	0.000113	0.000554	0.000177	0.000757	0.00031	0.000329	0.000241	0.000287	0.000258	0.000224	0.00022
1919.17	1.4e-05	9.2e-05	0.000398	0.000127	0.000492	0.000193	0.000215	0.000137	0.000171	0.000168	0.000132	0.000167
1921.1	0.000168	2.1e-05	-3.9e-05	-8e-06	-0.000118	-4.3e-05	-2.3e-05	-4.5e-05	-5.4e-05	-3.2e-05	-2.6e-05	3.8e-05
1923.03	0.000224	-4.1e-05	-0.000381	-0.000124	-0.000574	-0.000198	-0.000203	-0.000149	-0.000196	-0.000187	-0.000111	-9.5e-05
1924.96	0.000164	-6.8e-05	-0.000479	-0.000156	-0.000693	-0.000231	-0.000239	-0.00016	-0.000221	-0.000218	-0.00011	-0.000154
1926.89	0.000146	-7e-05	-0.000452	-0.00013	-0.000626	-0.000196	-0.00022	-0.000125	-0.000199	-0.000184	-0.000106	-0.000145
1928.82	0.000116	-6e-06	-0.000187	-2.8e-05	-0.000261	-4.6e-05	-5.5e-05	-1e-05	-5.3e-05	-4.1e-05	-1.6e-05	-5.8e-05
1930.74	1.5e-05	6.1e-05	0.000138	7.3e-05	0.000145	7.6e-05	0.000115	7.9e-05	8.3e-05	9.7e-05	8e-05	7.3e-05
1932.67	9e-06	4.5e-05	7.6e-05	5.2e-05	3.9e-05	3e-06	3.8e-05	4.3e-05	2e-05	3.6e-05	2.9e-05	9e-05
1934.6	3.6e-05	4.7e-05	5.7e-05	6.3e-05	2.9e-05	9e-06	1.9e-05	7.2e-05	3.7e-05	1.8e-05	3.6e-05	9.2e-05
1936.53	-1.6e-05	0.000103	0.000309	0.000156	0.000397	0.000188	0.00017	0.000193	0.000194	0.000148	0.000163	0.000181
1938.46	-7.6e-05	0.000137	0.000482	0.000208	0.000676	0.000308	0.000281	0.000252	0.000276	0.000253	0.000219	0.000239
1940.39	-0.000104	0.000129	0.00044	0.000184	0.000647	0.000284	0.000261	0.000211	0.000244	0.000241	0.000181	0.000212
1942.32	-6.5e-05	6.2e-05	0.000156	7.2e-05	0.00023	9.7e-05	8e-05	6.7e-05	9.3e-05	9.7e-05	5.6e-05	9.9e-05
1944.25	3.2e-05	-2.7e-05	-0.000228	-6.4e-05	-0.00033	-0.000133	-0.000147	-0.000104	-0.000109	-8.7e-05	-9.9e-05	-6.9e-05
1946.18	0.000106	-7.6e-05	-0.000479	-0.000149	-0.000694	-0.000259	-0.00029	-0.000188	-0.000224	-0.000204	-0.000182	-0.000186
1948.1	0.000103	-4.9e-05	-0.000382	-0.000105	-0.000549	-0.000173	-0.000205	-0.000126	-0.000146	-0.000133	-0.000106	-0.000148
1950.03	3.2e-05	1.2e-05	-7.2e-05	4e-06	-9.8e-05	2.1e-05	0	-7e-06	1e-06	4.1e-05	4.2e-05	2e-06
1951.96	-1e-05	3.3e-05	3e-05	2.7e-05	6.8e-05	6.7e-05	5.4e-05	3.2e-05	2.6e-05	8.3e-05	6.9e-05	5.7e-05
1953.89	-2.5e-05	3.6e-05	2.5e-05	2.6e-05	8.6e-05	4.9e-05	4.1e-05	3.9e-05	1.3e-05	5.6e-05	5.8e-05	6.8e-05
1955.82	-1e-05	6e-06	-2e-05	5e-06	3e-05	5e-06	1.4e-05	1.6e-05	-1.6e-05	1.5e-05	2.2e-05	7e-05
1957.75	1.7e-05	-3.6e-05	-0.000102	-2.6e-05	-8.7e-05	-4.5e-05	-2.3e-05	-2.2e-05	-5.5e-05	-3.7e-05	-3.1e-05	1.7e-05
1959.68	2.4e-05	-1.9e-05	-1.3e-05	2.2e-05	2.7e-05	1.6e-05	3.8e-05	2.7e-05	6e-06	-4e-06	2e-06	1.4e-05
1961.61	1.3e-05	4.2e-05	0.000266	0.000121	0.000387	0.00016	0.000192	0.000145	0.000151	0.000142	0.000117	9.9e-05
1963.53	1.4e-05	6.6e-05	0.000343	0.000133	0.000466	0.000187	0.000219	0.000171	0.000174	0.000203	0.000164	0.000134
1965.46	3.7e-05	5e-05	0.000159	5.4e-05	0.00021	7.4e-05	0.000101	9.2e-05	9e-05	0.000122	0.000102	7.8e-05
1967.39	5.1e-05	6e-06	-9.1e-05	-3.3e-05	-0.000118	-5.3e-05	-4.5e-05	-1.4e-05	-9e-06	-9e-06	1.2e-05	1.8e-05
1969.32	6.3e-05	-4.7e-05	-0.000291	-8.7e-05	-0.000385	-0.000134	-0.000135	-9.6e-05	-9.2e-05	-0.000118	-7.1e-05	-3.5e-05
1971.25	6.2e-05	-5.9e-05	-0.000325	-8.8e-05	-0.000439	-0.000133	-0.000148	-0.000105	-0.000106	-0.000158	-0.000103	-8e-05
1973.18	2.5e-05	-9e-06	-0.000114	-2e-05	-0.000164	-2.5e-05	-3.2e-05	-1.4e-05	-1.7e-05	-8.1e-05	-3.1e-05	-3e-05
1975.11	-8e-06	2.7e-05	8e-05	3.1e-05	8.8e-05	4.6e-05	6.8e-05	6.2e-05	4.1e-05	8e-06	4.3e-05	5.5e-05
1977.04	-3e-06	1.6e-05	6e-05	1.6e-05	6.2e-05	1.8e-05	5e-05	5.2e-05	9e-06	2.1e-05	4.6e-05	5.3e-05
1978.97	6e-06	1.5e-05	1.1e-05	-5e-06	2e-06	0	1e-05	3.2e-05	-4e-06	1.3e-05	2.3e-05	3e-05
1980.89	9e-06	3.2e-05	3.6e-05	8e-06	4e-05	3.8e-05	1.8e-05	4.5e-05	2e-05	3.2e-05	1.5e-05	4.3e-05
1982.82	2e-05	4.8e-05	0.0001	4.8e-05	0.000138	9e-05	5.2e-05	7.8e-05	5.5e-05	8.4e-05	3e-05	6e-05
1984.75	-3e-06	8.1e-05	0.000221	9.7e-05	0.000296	0.00016	0.000115	0.000126	0.000125	0.000141	7.3e-05	8.7e-05
1986.68	-6.8e-05	0.000126	0.000418	0.000156	0.000529	0.000256	0.000226	0.000181	0.000207	0.000206	0.000155	0.00016
1988.61	-9.7e-05	0.000101	0.00036	0.000137	0.000441	0.000204	0.000184	0.00013	0.000152	0.000168	0.000142	0.000153
1990.54	-8.7e-05	2.3e-05	5e-05	3.2e-05	6.2e-05	2.8e-05	2.1e-05	-3e-06	2e-06	3.4e-05	3e-05	4.8e-05
1992.47	-4e-05	-5.7e-05	-0.000277	-8.3e-05	-0.000322	-0.000146	-0.000139	-0.000121	-0.000145	-0.000122	-9.1e-05	-5.6e-05
1994.4	1.7e-05	-0.000109	-0.000426	-0.000142	-0.000502	-0.000227	-0.000206	-0.000157	-0.000208	-0.000202	-0.00015	-0.000105
1996.32	4.3e-05	-0.000115	-0.000385	-0.000128	-0.000463	-0.000203	-0.000182	-0.000125	-0.000177	-0.000174	-0.000132	-0.000104
1998.25	9e-06	-5.6e-05	-0.000179	-5.7e-05	-0.000225	-7.4e-05	-7.2e-05	-3.9e-05	-7.9e-05	-7.3e-05	-5.6e-05	-4.6e-05
2000.18	-2.7e-05	1.3e-05	3.9e-05	1.9e-05	3.3e-05	4.4e-05	2.9e-05	4.3e-05	1e-05	2.4e-05	2.4e-05	2.4e-05
2002.11	-1.5e-05	3.4e-05	4.4e-05	3.9e-05	4.7e-05	4.6e-05	1.6e-05	5.2e-05	2.9e-05	3.5e-05	2.5e-05	1.1e-05
2004.04	1.1e-05	3.8e-05	2.6e-05	4.3e-05	6e-05	4.5e-05	1.5e-05	5.5e-05	5.2e-05	4.5e-05	2.5e-05	-8e-06
2005.97	4.3e-05	3.9e-05	4.2e-05	4.3e-05	7.8e-05	5e-05	2.6e-05	4.5e-05	5.8e-05	5.5e-05	4.5e-05	9e-06
2007.9	6.7e-05	3.3e-05	2.2e-05	3.5e-05	1.6e-05	2.4e-05	2.4e-05	2.4e-05	3.2e-05	4e-05	4.2e-05	2.5e-05
2009.83	7.4e-05	5.7e-05	7.1e-05	5.9e-05	7.6e-05	5.8e-05	7.4e-05	4.8e-05	4.7e-05	6.3e-05	6.2e-05	6.9e-05
2011.76	6.4e-05	0.000118	0.000254	0.000116	0.000314	0.000176	0.000194	0.000141	0.000136	0.000142	0.000131	0.000171
2013.68	6.7e-05	0.000142	0.000347	0.00014	0.000425	0.000228	0.000241	0.000191	0.000203	0.000179	0.000168	0.000217
2015.61	7.7e-05	0.000109	0.000251	0.000103	0.000314	0.000179	0.000177	0.000147	0.000181	0.000148	0.000142	0.000172
2017.54	7.5e-05	4.1e-05	5e-05	3.5e-05	6.7e-05	6.9e-05	7.2e-05	5.8e-05	9e-05	7.6e-05	9.4e-05	9.8e-05
2019.47	6.9e-05	-1.5e-05	-0.000139	-2.5e-05	-0.000192	-5.8e-05	-3e-05	-2.9e-05	-1.7e-05	-1.6e-05	4.1e-05	2.7e-05
2021.4	6e-05	-2.8e-05	-0.000209	-4.1e-05	-0.000291	-0.000116	-6.6e-05	-5.7e-05	-6.8e-05	-7.6e-05	-2e-06	-5e-06
2023.33	4.3e-05	6e-06	-0.000105	-3e-06	-0.000145	-5.1e-05	-9e-06	-5e-06	-2.7e-05	-4.5e-05	1.1e-05	1.7e-05
2025.26	3e-05	5e-05	3.3e-05	3.8e-05	3e-05	3e-05	5e-05	5.3e-05	3.9e-05	3e-05	3.8e-05	4.9e-05
2027.19	3.3e-05	5.3e-05	3.6e-05	3.8e-05	2.1e-05	2.4e-05	2.7e-05	5.4e-05	3.2e-05	5.9e-05	2.2e-05	2.5e-05
2029.11	3.1e-05	4.8e-05	2.1e-05	3.7e-05	1e-05	1.9e-05	1.6e-05	4.6e-05	1.4e-05	7.2e-05	1.5e-05	4e-06
2031.04	1.6e-05	4.3e-05	2.4e-05	3.8e-05	2.5e-05	2.2e-05	1.8e-05	3.9e-05	2.5e-05	5.5e-05	3.1e-05	2.3e-05
2032.97	8e-06	2.9e-05	1.4e-05	2.5e-05	1.9e-05	2.5e-05	6e-06	2.9e-05	1.9e-05	2.4e-05	3.4e-05	3.9e-05
2034.9	4e-06	3.9e-05	8.2e-05	5.6e-05	0.000122	8.9e-05	5.4e-05	5e-05	5e-05	5.2e-05	5.3e-05	6.8e-05
2036.83	-1.6e-05	4e-05	0.000145	8.7e-05	0.000217	0.000127	8.2e-05	7.3e-05	7.8e-05	9e-05	6.2e-05	8.8e-05
2038.76	-3.7e-05	2.6e-05	0.000115	7.4e-05	0.000174	9.1e-05	5.6e-05	6.4e-05	5.7e-05	8.3e-05	2.4e-05	6.1e-05
2040.69	-4.6e-05	2e-06	3.3e-05	3.6e-05	4.8e-05	2.7e-05	9e-06	3.5e-05	6e-06	3.6e-05	-2.5e-05	5e-06
2042.62	-3.7e-05	-2.5e-05	-7.4e-05	-1.8e-05	-9.7e-05	-4.6e-05	-5.4e-05	-1.7e-05	-4.7e-05	-3e-05	-5.7e-05	-4.5e-05
2044.54	-1.1e-05	-3.8e-05	-0.000162	-7.2e-05	-0.000195	-8.6e-05	-9.6e-05	-6.3e-05	-7.2e-05	-7.2e-05	-5.9e-05	-6.5e-05
2046.47	1.4e-05	-3.3e-05	-0.000165	-8.6e-05	-0.000173	-5.7e-05	-7.9e-05	-5.3e-05	-6.8e-05	-4.4e-05	-3.6e-05	-5.4e-05
2048.4	2.2e-05	-4e-06	-7.9e-05	-2.8e-05	-3.4e-05	4e-06	-6e-06	-6e-06	-2.8e-05	2e-05	2e-06	-4e-06
2050.33	5e-06	1.3e-05	-3.7e-05	1.8e-05	2.1e-05	1.2e-05	2.4e-05	2.8e-05	-1.9e-05	2.9e-05	1.6e-05	3.2e-05
2052.26	-6e-06	1.3e-05	-2.7e-05	2.8e-05	1.7e-05	1e-05	3e-05	3.8e-05	-2.3e-05	5e-06	1.8e-05	2.4e-05
2054.19	-8e-06	1.1e-05	1.3e-05	2.7e-05	2.9e-05	2.5e-05	4.2e-05	2.9e-05	1e-06	-5e-06	2.1e-05	1.9e-05
2056.12	9e-06	0	1.4e-05	7e-06	1.4e-05	1.9e-05	2.8e-05	1.1e-05	1.6e-05	-1e-06	1.3e-05	1.4e-05
2058.05	1.8e-05	9e-06	6.9e-05	1.6e-05	9.7e-05	6.1e-05	5.5e-05	3.3e-05	5.9e-05	3.9e-05	3.3e-05	3.2e-05
2059.98	1.4e-05	3.4e-05	0.000174	4.4e-05	0.000238	0.000114	0.000104	8.4e-05	0.000104	8.6e-05	7.7e-05	7.9e-05
2061.9	1.8e-05	3.7e-05	0.000167	5e-05	0.000229	9.5e-05	0.000102	8.5e-05	9.7e-05	7.7e-05	7.5e-05	7.7e-05
2063.83	1.7e-05	2e-06	5.6e-05	2.1e-05	9.2e-05	3.3e-05	5.1e-05	4.5e-05	4.9e-05	1.9e-05	3.5e-05	3e-05
2065.76	1.4e-05	-4.9e-05	-7.1e-05	-2.5e-05	-5.7e-05	-4.1e-05	-2.2e-05	-1.8e-05	-1.7e-05	-5.2e-05	-1.2e-05	-1.1e-05
2067.69	9e-06	-6.1e-05	-0.00014	-5.6e-05	-0.000166	-9.3e-05	-6.7e-05	-6.7e-05	-6.4e-05	-8.7e-05	-5.2e-05	-3.7e-05
2069.62	-3e-06	-4e-05	-0.000132	-5.9e-05	-0.000179	-0.0001	-6.5e-05	-7e-05	-7.7e-05	-6.9e-05	-5.4e-05	-4.9e-05
2071.55	-9e-06	7e-06	-2.2e-05	-2.2e-05	-6.1e-05	-3.4e-05	-3e-06	-2.4e-05	-4.3e-05	-2e-05	-9e-06	-1.5e-05
2073.48	-4e-06	3.3e-05	5.4e-05	4e-06	1.6e-05	1.2e-05	2.2e-05	1.3e-05	-1.5e-05	3e-06	1.5e-05	1e-05
2075.41	-4e-06	1e-05	1.4e-05	-3e-06	-1.1e-05	7e-06	-7e-06	1.2e-05	-1.8e-05	-7e-06	-8e-06	-1.5e-05
2077.33	-2e-05	-1.9e-05	-3e-05	-5e-06	-2.2e-05	7e-06	-3.1e-05	4e-06	-1.3e-05	-1.4e-05	-3e-05	-2.9e-05
2079.26	-3.2e-05	-1.9e-05	-3.5e-05	-6e-06	-1.3e-05	-7e-06	-5.5e-05	-2e-05	-4e-06	-2.6e-05	-4.2e-05	-2.1e-05
2081.19	-4.6e-05	-8e-06	-2.9e-05	-1.1e-05	-2e-06	-2.1e-05	-4.9e-05	-3.4e-05	-9e-06	-2.3e-05	-4.1e-05	-1.8e-05
2083.12	-5.2e-05	-1e-06	-6e-06	-3e-06	2.8e-05	5e-06	-1.5e-05	-2.2e-05	-8e-06	8e-06	-2.4e-05	0
2085.05	-4e-05	-1e-06	2.6e-05	4e-06	6.7e-05	4.3e-05	2e-05	-3e-06	2e-06	2.5e-05	-8e-06	2.5e-05
2086.98	-4.5e-05	-2.9e-05	-5e-06	-1.3e-05	4.1e-05	3.3e-05	7e-06	-1e-06	-2.3e-05	1e-06	-2.5e-05	1e-05
2088.91	-5.1e-05	-5e-05	-6.2e-05	-3.8e-05	-3.5e-05	-6e-06	-2.6e-05	-1.1e-05	-6.1e-05	-3e-05	-4.5e-05	-3.2e-05
2090.84	-5.1e-05	-4.6e-05	-0.000102	-5.5e-05	-0.000116	-5.1e-05	-6e-05	-4.1e-05	-7.9e-05	-6.5e-05	-5e-05	-6.9e-05
2092.77	-5.3e-05	-3e-05	-9.9e-05	-5.9e-05	-0.000135	-8.4e-05	-8.6e-05	-6.3e-05	-8.3e-05	-8.4e-05	-3.6e-05	-8.1e-05
2094.69	-5.5e-05	-2.4e-05	-7.8e-05	-5.2e-05	-8.9e-05	-7.8e-05	-7.7e-05	-5e-05	-7.1e-05	-5.4e-05	-9e-06	-7.3e-05
2096.62	-4.6e-05	-2.3e-05	-4.7e-05	-3.8e-05	-1.8e-05	-3.2e-05	-4.4e-05	-2.3e-05	-3.1e-05	-1.4e-05	5e-06	-4.4e-05
2098.55	-3.3e-05	-3.8e-05	-4.4e-05	-2.7e-05	-1e-06	-9e-06	-3.7e-05	-1.9e-05	-1.4e-05	-8e-06	-1.1e-05	-2.2e-05
2100.48	-2.6e-05	-5.5e-05	-6.3e-05	-1.8e-05	-3.3e-05	-2.3e-05	-4e-05	-1.8e-05	-3.2e-05	-2.1e-05	-2.8e-05	-1.5e-05
2102.41	-2.4e-05	-4.3e-05	-4.8e-05	-1.1e-05	-3.6e-05	-3.5e-05	-2e-05	-1.8e-05	-4.1e-05	-2.6e-05	-1.5e-05	-1.1e-05
2104.34	-3.7e-05	-2.4e-05	-2.6e-05	-2e-05	-2.1e-05	-4.3e-05	-1e-05	-3.5e-05	-3e-05	-3.3e-05	-9e-06	-8e-06
2106.27	-3.8e-05	-6e-06	-3e-06	-3.6e-05	-4e-06	-3.4e-05	-7e-06	-2.5e-05	-2.7e-05	-2.7e-05	-4e-06	-4e-06
2108.2	-1.5e-05	2e-06	2.2e-05	-4.3e-05	3.2e-05	-4e-06	1.3e-05	1e-06	-2e-05	-5e-06	4e-06	4e-06
2110.12	1.9e-05	-1e-06	4.3e-05	-3.4e-05	6.3e-05	2.8e-05	3e-05	1.9e-05	-2e-06	8e-06	5e-06	1.2e-05
2112.05	2.9e-05	-1.8e-05	3.8e-05	-2.2e-05	3.7e-05	1.7e-05	1.1e-05	8e-06	0	-1e-06	-6e-06	6e-06
2113.98	2.1e-05	-3.1e-05	2.2e-05	-1.7e-05	-6e-06	-1.4e-05	-1e-05	-2.1e-05	-6e-06	-3.3e-05	-1.5e-05	1e-06
2115.91	-2e-06	-4e-05	-1.5e-05	-2.2e-05	-4.8e-05	-4.3e-05	-4.4e-05	-5.3e-05	-2.4e-05	-6.6e-05	-2.5e-05	-8e-06
2117.84	-2.1e-05	-4e-05	-4.2e-05	-2e-05	-7.8e-05	-5.7e-05	-7.9e-05	-7.4e-05	-5.3e-05	-7.3e-05	-3.7e-05	-2e-05
2119.77	-2.7e-05	-2.7e-05	-4e-05	-1.1e-05	-7.6e-05	-4.9e-05	-7.2e-05	-7.1e-05	-8.4e-05	-6.5e-05	-3.8e-05	-3.9e-05
2121.7	-3.8e-05	-1.5e-05	-2e-05	0	-3.9e-05	-3.4e-05	-4.3e-05	-4.8e-05	-7.2e-05	-4.4e-05	-3.5e-05	-4.8e-05
2123.63	-4.5e-05	-2.2e-05	-2.1e-05	-9e-06	-3.4e-05	-4.2e-05	-3.8e-05	-2.1e-05	-3.8e-05	-1.8e-05	-3.4e-05	-5e-05
2125.56	-5.1e-05	-2.8e-05	-3.6e-05	-2.7e-05	-6.4e-05	-6.2e-05	-4.1e-05	-2.5e-05	-2.5e-05	-9e-06	-4.5e-05	-4.7e-05
2127.48	-5.4e-05	-2.7e-05	-5.2e-05	-4.3e-05	-8.3e-05	-6.1e-05	-3.2e-05	-4.5e-05	-2e-05	-2.2e-05	-6.2e-05	-4.2e-05
2129.41	-6.2e-05	-3.6e-05	-6.4e-05	-5.1e-05	-5.7e-05	-3.9e-05	-3.8e-05	-5.3e-05	-3.5e-05	-3.7e-05	-6.3e-05	-4.4e-05
2131.34	-7.4e-05	-3.9e-05	-4.8e-05	-3.3e-05	-5e-06	-1.6e-05	-5.3e-05	-5.5e-05	-6.6e-05	-5.1e-05	-6e-05	-5.9e-05
2133.27	-7.3e-05	-3.5e-05	-2.9e-05	-1.2e-05	1.1e-05	-1.9e-05	-6.4e-05	-6.1e-05	-7.3e-05	-7.4e-05	-6e-05	-7.6e-05
2135.2	-6.9e-05	-2.4e-05	-2.4e-05	-2e-06	-9e-06	-3.5e-05	-7.4e-05	-4.6e-05	-6e-05	-7.9e-05	-6.2e-05	-6.5e-05
2137.13	-5.1e-05	-2.3e-05	-5.1e-05	-5e-06	-6.5e-05	-5.3e-05	-8.5e-05	-3.8e-05	-6.3e-05	-6.4e-05	-6e-05	-4.6e-05
2139.06	-3.6e-05	-2.6e-05	-7.7e-05	-6e-06	-0.000107	-5.6e-05	-7.7e-05	-4.5e-05	-7e-05	-4.6e-05	-4.4e-05	-3.1e-05
2140.99	-3.1e-05	-3.2e-05	-8.3e-05	-1.2e-05	-0.000105	-4e-05	-6.1e-05	-3.9e-05	-5.8e-05	-3.1e-05	-2.9e-05	-2.3e-05
2142.91	-3.2e-05	-3.6e-05	-5.1e-05	-2e-05	-5.3e-05	-1.9e-05	-4.7e-05	-2.4e-05	-4.5e-05	-1.9e-05	-8e-06	-2.1e-05
2144.84	-3.6e-05	-2.3e-05	-1e-05	-1.6e-05	-1.2e-05	-3.1e-05	-4.3e-05	-2.5e-05	-4.7e-05	-1.4e-05	4e-06	-2.9e-05
2146.77	-3e-05	-7e-06	5e-06	-1.5e-05	-5e-06	-5.7e-05	-4.2e-05	-2.9e-05	-2.5e-05	-1.8e-05	-1e-06	-2.7e-05
2148.7	-3e-05	-9e-06	-1.1e-05	-2.9e-05	-1.9e-05	-5.6e-05	-4.8e-05	-1.4e-05	-6e-06	-1.7e-05	-2.1e-05	-1.6e-05
2150.63	-1.3e-05	-1.9e-05	-2.9e-05	-3.5e-05	-4.2e-05	-3.8e-05	-4.6e-05	-1.2e-05	-8e-06	-1.4e-05	-2.7e-05	-1.3e-05
2152.56	2e-06	-3.2e-05	-2.6e-05	-1.2e-05	-3.5e-05	-1.4e-05	-1.9e-05	-1.1e-05	-3e-06	-1.2e-05	-3.1e-05	-1.4e-05
2154.49	7e-06	-2.7e-05	-5e-06	8e-06	-1.8e-05	8e-06	1.8e-05	-2e-06	-3e-06	-1.3e-05	-4.9e-05	-1.4e-05
2156.42	1e-05	-4e-06	2.8e-05	1.2e-05	-4e-06	1.6e-05	4.8e-05	-1e-06	-1.3e-05	-2e-05	-5.4e-05	-5e-06
2158.35	7e-06	1.1e-05	4.5e-05	2e-06	1e-05	6e-06	4.7e-05	-6e-06	-2.3e-05	-2.1e-05	-5e-05	7e-06
2160.27	8e-06	4e-06	3.4e-05	-2.7e-05	1e-05	-1.5e-05	3.2e-05	-2e-05	-3.2e-05	-2.8e-05	-4.6e-05	1.1e-05
2162.2	-2e-06	-1.9e-05	7e-06	-5.5e-05	-1e-05	-2.9e-05	6e-06	-3.7e-05	-4.3e-05	-4.2e-05	-5.3e-05	4e-06
2164.13	-2.9e-05	-3.4e-05	-2.2e-05	-5.5e-05	-2.7e-05	-3.7e-05	-1.9e-05	-4.6e-05	-3.9e-05	-4.7e-05	-6e-05	-4e-06
2166.06	-5.1e-05	-3.6e-05	-3.8e-05	-3.4e-05	-3.1e-05	-4.3e-05	-2.9e-05	-4e-05	-3.3e-05	-3.9e-05	-5.9e-05	-2.2e-05
2167.99	-4.6e-05	-1.9e-05	-2.7e-05	-3.5e-05	-3.3e-05	-4e-05	-2.7e-05	-3e-05	-3e-05	-3.7e-05	-5e-05	-3.2e-05
2169.92	-2.6e-05	-1.8e-05	-1.5e-05	-4.5e-05	-4.2e-05	-4e-05	-2.7e-05	-2.1e-05	-3.5e-05	-5.6e-05	-3.2e-05	-2.6e-05
2171.85	-2e-05	-3.2e-05	-1.6e-05	-3.5e-05	-4.5e-05	-4.3e-05	-2.9e-05	-2.3e-05	-4.9e-05	-5.4e-05	-2e-05	-2.2e-05
2173.78	-2.6e-05	-4e-05	-3.1e-05	-2.2e-05	-4e-05	-3.8e-05	-2.9e-05	-2.2e-05	-6.4e-05	-3.8e-05	-2.2e-05	-2.3e-05
2175.7	-5.4e-05	-3.2e-05	-4.4e-05	-1.2e-05	-2.9e-05	-2.5e-05	-4.2e-05	-5e-06	-6.6e-05	-2.4e-05	-3.1e-05	-3.2e-05
2177.63	-8.9e-05	-1.1e-05	-4.6e-05	-9e-06	-1.8e-05	-2.1e-05	-5e-05	-2e-06	-6.9e-05	-9e-06	-4.2e-05	-4.4e-05
2179.56	-8.5e-05	-9e-06	-4.7e-05	-1.9e-05	-2.7e-05	-2.8e-05	-4e-05	-1.3e-05	-7.8e-05	-1.9e-05	-5.1e-05	-5.4e-05
2181.49	-6.9e-05	-3e-05	-5.7e-05	-3.6e-05	-5.4e-05	-3.4e-05	-4.4e-05	-3.3e-05	-6.5e-05	-4e-05	-5.3e-05	-3.3e-05
2183.42	-6.5e-05	-4.5e-05	-7.1e-05	-3.3e-05	-7.9e-05	-2.7e-05	-5.9e-05	-5e-05	-3.8e-05	-4.2e-05	-4.4e-05	-4e-06
2185.35	-6.4e-05	-3.9e-05	-6.5e-05	-1e-05	-8e-05	-8e-06	-5.5e-05	-6.7e-05	-2e-05	-1.1e-05	-3.3e-05	5e-06
2187.28	-5.5e-05	-2.3e-05	-5e-05	-2e-06	-6.2e-05	1e-06	-4.8e-05	-6.2e-05	-1.7e-05	1e-06	-3e-05	2e-06
2189.21	-5e-05	0	-1.7e-05	6e-06	-3.5e-05	-1.2e-05	-3.5e-05	-3e-05	-2.2e-05	-1.1e-05	-2.5e-05	1.6e-05
2191.13	-4.9e-05	-2e-06	1e-06	1e-06	-1.4e-05	-4.2e-05	-1.4e-05	5e-06	-2.1e-05	-4.1e-05	-2.3e-05	2.9e-05
2193.06	-3.5e-05	-2.7e-05	-1.8e-05	-1.6e-05	-1.1e-05	-5.9e-05	-1.2e-05	2.3e-05	-1.7e-05	-6.1e-05	-2.2e-05	1.5e-05
2194.99	-2.1e-05	-2.7e-05	-3.6e-05	-3e-05	-1.3e-05	-4.6e-05	-3.6e-05	1.1e-05	-1.7e-05	-3.5e-05	-7e-06	-1.1e-05
2196.92	-9e-06	-8e-06	-3.3e-05	-3.6e-05	-1e-05	-1.2e-05	-3.3e-05	-7e-06	-1.7e-05	-1e-06	1.4e-05	-4.3e-05
2198.85	5e-06	-1e-05	-2.3e-05	-2.1e-05	-5e-06	1.3e-05	4e-06	-1.8e-05	-1.8e-05	2.7e-05	2.9e-05	-4.7e-05
2200.78	1.5e-05	-2.3e-05	-6e-06	1e-06	-3e-06	1.8e-05	2.9e-05	-2e-06	-1.3e-05	4e-05	3.4e-05	-2.3e-05
2202.71	2.1e-05	-1.9e-05	2.5e-05	1.7e-05	3e-06	1.5e-05	4.5e-05	2.6e-05	2e-06	3.4e-05	3.3e-05	1.9e-05
2204.64	2.8e-05	-9e-06	4.4e-05	1.6e-05	1.7e-05	1.4e-05	5.2e-05	3.1e-05	1.8e-05	6e-06	2.4e-05	3.6e-05
2206.57	3.2e-05	5e-06	4.4e-05	3e-06	1.6e-05	1.8e-05	4.2e-05	2.6e-05	1.8e-05	-1.1e-05	1.3e-05	4.2e-05
2208.49	2.2e-05	2e-05	3.6e-05	-4e-06	9e-06	1.3e-05	2.6e-05	1.8e-05	1e-05	-1e-05	3e-06	4.5e-05
2210.42	-3e-06	1.9e-05	1.8e-05	1e-06	0	4e-06	2.5e-05	-2e-06	-2e-06	-1.4e-05	-1e-06	3.4e-05
2212.35	-2.6e-05	3e-06	-7e-06	7e-06	-8e-06	0	1.9e-05	-1.6e-05	-2e-05	-5e-06	5e-06	2.6e-05
2214.28	-3.1e-05	-1e-06	-1.3e-05	1.1e-05	-1.9e-05	-5e-06	-8e-06	-1.5e-05	-3.6e-05	5e-06	1.4e-05	1.5e-05
2216.21	-1.6e-05	8e-06	-4e-06	1.2e-05	-1.3e-05	2e-06	-1.6e-05	-1e-06	-2.8e-05	8e-06	1.8e-05	1.4e-05
2218.14	-1e-06	1.2e-05	7e-06	1.3e-05	-2e-06	2.1e-05	-7e-06	2.3e-05	-7e-06	1.8e-05	2.7e-05	2.4e-05
2220.07	-1e-06	1.2e-05	1.7e-05	2.2e-05	-7e-06	2.3e-05	3e-06	4.7e-05	1e-06	3.7e-05	3.5e-05	4e-05
2222	-6e-06	1.1e-05	1.6e-05	3.5e-05	-1e-06	1.4e-05	1.8e-05	5.3e-05	1e-06	4.4e-05	3e-05	3.8e-05
2223.92	-1.8e-05	1.1e-05	1.7e-05	3.7e-05	1.3e-05	1.4e-05	2.7e-05	4.4e-05	-8e-06	3.1e-05	3.4e-05	3.7e-05
2225.85	-3e-05	1.5e-05	8e-06	2.3e-05	1.1e-05	1.1e-05	1.3e-05	3.9e-05	-1.2e-05	1.1e-05	4.3e-05	4.5e-05
2227.78	-1.8e-05	1.5e-05	-1.1e-05	2e-06	-7e-06	7e-06	-7e-06	2.7e-05	-4e-06	6e-06	3.4e-05	4.2e-05
2229.71	5e-06	7e-06	-1.7e-05	-5e-06	-2.1e-05	1.2e-05	-1.4e-05	1.2e-05	3e-06	1.1e-05	1.5e-05	3.1e-05
2231.64	8e-06	2e-06	-1e-05	2e-05	-2.2e-05	1.4e-05	-1.3e-05	4e-06	5e-06	1.5e-05	4e-06	2.1e-05
2233.57	5e-06	2e-05	7e-06	6.1e-05	-7e-06	9e-06	9e-06	1e-05	6e-06	1.9e-05	-3e-06	2.6e-05
2235.5	6e-06	4.3e-05	2.1e-05	8.9e-05	2e-05	1.6e-05	4.1e-05	3.4e-05	2.1e-05	2.2e-05	3e-06	4.8e-05
2237.43	-1e-06	6.2e-05	3.7e-05	8.7e-05	3.3e-05	3.8e-05	5.2e-05	4.8e-05	4.7e-05	3.3e-05	2.9e-05	7.4e-05
2239.36	-3e-06	8e-05	4.1e-05	7e-05	3.2e-05	4.6e-05	4.2e-05	5.1e-05	6.7e-05	4.5e-05	5.9e-05	7.5e-05
2241.28	1.9e-05	7.9e-05	4.2e-05	4.8e-05	3.7e-05	4.7e-05	2e-05	4.1e-05	5.9e-05	5.4e-05	6.9e-05	6.3e-05
2243.21	3.6e-05	4.6e-05	4.1e-05	4.1e-05	3.3e-05	4.2e-05	-2e-06	3.1e-05	3.1e-05	5.1e-05	6.5e-05	5.2e-05
2245.14	4.3e-05	2.5e-05	2.9e-05	5.1e-05	3e-05	4.1e-05	8e-06	4.3e-05	1e-05	5.3e-05	4.8e-05	4.1e-05
2247.07	5.9e-05	3.4e-05	3.9e-05	6.4e-05	3.9e-05	4.9e-05	4.8e-05	6.5e-05	1.6e-05	6.8e-05	2.8e-05	5.4e-05
2249	6.4e-05	4.9e-05	6e-05	7.5e-05	5.1e-05	5.2e-05	9.3e-05	8.4e-05	4e-05	6.9e-05	3.1e-05	7.5e-05
2250.93	5.3e-05	5.7e-05	8.5e-05	9.2e-05	6.7e-05	6.2e-05	0.00012	9.5e-05	6.4e-05	5.7e-05	5.4e-05	8.8e-05
2252.86	4.6e-05	6.4e-05	0.000104	0.000114	6.6e-05	7.2e-05	0.000118	9.2e-05	7.8e-05	5.8e-05	8.3e-05	9.5e-05
2254.79	5.4e-05	5.8e-05	9.8e-05	0.000121	4.7e-05	6.8e-05	9e-05	8.6e-05	8.2e-05	7.5e-05	0.000101	9.1e-05
2256.71	4.7e-05	5.5e-05	7.8e-05	0.000115	2.6e-05	5.9e-05	6.6e-05	8.7e-05	8.1e-05	8.6e-05	0.000105	9e-05
2258.64	2.7e-05	6.5e-05	5.2e-05	0.000103	2.7e-05	4.2e-05	4.9e-05	8.4e-05	6.8e-05	8.8e-05	9.2e-05	8.9e-05
2260.57	2.8e-05	6.1e-05	3e-05	8.2e-05	3.1e-05	3.6e-05	4.1e-05	7.2e-05	4.2e-05	7.3e-05	7.6e-05	9.8e-05
2262.5	2.9e-05	5.3e-05	1.6e-05	7.3e-05	1.7e-05	4.9e-05	4.7e-05	5.9e-05	2.2e-05	4.5e-05	7.1e-05	9.3e-05
2264.43	3.2e-05	5.2e-05	2.7e-05	8.6e-05	6e-06	8.2e-05	5.7e-05	4.4e-05	8e-06	3.7e-05	7.3e-05	7.7e-05
2266.36	4.2e-05	6e-05	6.6e-05	9.9e-05	5e-06	0.000102	6.5e-05	3.7e-05	9e-06	6.1e-05	7.5e-05	7.5e-05
2268.29	5.6e-05	7.5e-05	9.7e-05	0.000113	3.1e-05	8.8e-05	6.4e-05	5.8e-05	3.3e-05	7.2e-05	7e-05	7.9e-05
2270.22	5.6e-05	9.4e-05	0.000114	0.000116	7.3e-05	7.8e-05	6.1e-05	7.8e-05	6.5e-05	6.3e-05	6e-05	0.000105
2272.15	5.4e-05	9.3e-05	0.000104	0.000101	0.000101	7.1e-05	6.4e-05	8.9e-05	8.6e-05	6.4e-05	5.2e-05	0.000128
2274.07	6e-05	9.1e-05	8.9e-05	7.5e-05	0.0001	7.3e-05	7.3e-05	0.0001	0.000103	7e-05	6.1e-05	0.000126
2276	5.6e-05	9.5e-05	8.4e-05	6.1e-05	9.5e-05	7.2e-05	7.8e-05	0.000103	0.000102	8.5e-05	7.9e-05	0.000109
2277.93	5.5e-05	8e-05	8e-05	5.8e-05	0.00011	7.9e-05	8.4e-05	0.00011	8.4e-05	0.000106	8.8e-05	0.000101
2279.86	5.8e-05	6.9e-05	8.3e-05	6.9e-05	0.000117	8.7e-05	9.4e-05	0.000115	6.4e-05	0.000122	8.2e-05	0.0001
2281.79	7.3e-05	8.1e-05	9.1e-05	0.000129	0.000104	9.5e-05	9.1e-05	0.000105	4.9e-05	0.000114	7.1e-05	9.5e-05
2283.72	9.7e-05	0.000104	9.6e-05	0.000207	7.6e-05	0.000123	7.8e-05	8.4e-05	3.5e-05	0.000108	7.7e-05	9.8e-05
2285.65	0.000109	0.000135	0.00012	0.000276	3.3e-05	0.000148	7.2e-05	7.5e-05	3.8e-05	0.000118	0.000111	0.000108
2287.58	0.000104	0.000159	0.000167	0.000329	1.1e-05	0.000158	7.1e-05	7e-05	7.4e-05	0.000143	0.000142	0.000148
2289.5	8.1e-05	0.00016	0.000196	0.000361	3.6e-05	0.000154	7.8e-05	7.2e-05	0.000114	0.000181	0.000144	0.000202
2291.43	7.3e-05	0.000156	0.000203	0.000383	8.8e-05	0.000139	9.6e-05	8.7e-05	0.000142	0.000204	0.00012	0.000224
2293.36	0.000106	0.000158	0.000198	0.000406	0.000114	0.000129	9.2e-05	9.3e-05	0.000125	0.000204	0.000102	0.000221
2295.29	0.000151	0.00014	0.000192	0.000434	0.000121	0.000137	7.6e-05	9.5e-05	9.2e-05	0.000184	9.8e-05	0.000214
2297.22	0.000185	0.000134	0.000192	0.00044	0.000113	0.000147	7.3e-05	0.000109	7.5e-05	0.000173	0.000103	0.000194
2299.15	0.000196	0.000154	0.00022	0.000452	9.7e-05	0.000163	8.4e-05	0.000114	6.7e-05	0.000187	0.000117	0.000182
2301.08	0.000175	0.000184	0.000255	0.000522	8.1e-05	0.000192	8.9e-05	0.000101	5.7e-05	0.000202	0.000125	0.000201
2303.01	0.000127	0.000231	0.000283	0.000642	5.9e-05	0.000214	7.6e-05	9.2e-05	4.5e-05	0.000209	0.000128	0.000247
2304.94	8e-05	0.000279	0.000299	0.000756	2.4e-05	0.000211	3.8e-05	8.1e-05	3.8e-05	0.000215	0.000121	0.000292
2306.86	3.7e-05	0.000267	0.000246	0.000782	-4.8e-05	0.000194	-2e-05	4.6e-05	1.3e-05	0.000208	0.000112	0.000307
2308.79	-2e-06	0.000172	0.000109	0.000695	-0.000127	0.000133	-4.1e-05	2.3e-05	-2.3e-05	0.000192	7.8e-05	0.000269
2310.72	-1.4e-05	7.7e-05	-3e-05	0.000554	-0.00021	3e-05	-3.5e-05	2.6e-05	-4.5e-05	0.000173	4.3e-05	0.000189
2312.65	-4.3e-05	3.6e-05	-7.2e-05	0.000506	-0.000272	-2e-05	-4.3e-05	1.8e-05	-6.8e-05	0.000158	7e-06	0.000136
2314.58	-0.000123	6.5e-05	-2e-06	0.000636	-0.000329	-6e-06	-6.7e-05	-9e-06	-0.000106	0.000153	-4.5e-05	0.00017
2316.51	-0.000214	0.000163	0.000106	0.000845	-0.000391	1.3e-05	-0.000126	-4.4e-05	-0.000113	0.000184	-8.5e-05	0.000254
2318.44	-0.000306	0.000251	0.000123	0.000944	-0.00047	9e-06	-0.00021	-8.5e-05	-9.1e-05	0.00019	-0.000112	0.000284
2320.37	-0.000375	0.000233	-2.8e-05	0.000854	-0.000559	-5e-06	-0.00028	-0.000114	-0.000104	0.000121	-0.000103	0.000261
2322.29	-0.000361	9.7e-05	-0.000272	0.000692	-0.000604	-5.4e-05	-0.000279	-9e-05	-0.000147	4e-05	-6.8e-05	0.000203
2324.22	-0.000295	-3.4e-05	-0.000404	0.000593	-0.000599	-0.000113	-0.000238	-5e-05	-0.000189	1.1e-05	-3.7e-05	0.000146
2326.15	-0.000264	-7.8e-05	-0.000364	0.000568	-0.000568	-0.000125	-0.000194	-5.6e-05	-0.000238	4.4e-05	-2.7e-05	0.000136
2328.08	-0.000251	-5.7e-05	-0.000288	0.000509	-0.000534	-0.000137	-0.000141	-5.6e-05	-0.000259	8e-05	-2e-06	0.00014
2330.01	-0.000239	2e-05	-0.000232	0.000382	-0.000488	-0.000161	-0.000112	-2.2e-05	-0.000203	8.9e-05	1.6e-05	9.5e-05
2331.94	-0.00025	7.6e-05	-0.000207	0.000208	-0.000406	-0.000138	-0.000117	9e-06	-0.000134	6.8e-05	1.6e-05	4.1e-05
2333.87	-0.00022	8.6e-05	-0.000199	0.000137	-0.000324	-5.9e-05	-9.1e-05	3.8e-05	-7.1e-05	4.1e-05	2.3e-05	4.5e-05
2335.8	-0.000136	8.6e-05	-0.000129	0.00027	-0.000244	1.5e-05	-2.2e-05	6.7e-05	-2e-06	5e-05	2.6e-05	0.000101
2337.72	1.8e-05	0.000113	4.2e-05	0.000489	-0.000127	7.5e-05	4.6e-05	8e-05	6.5e-05	0.000129	4.4e-05	0.0002
2339.65	0.000166	0.000125	0.000236	0.000498	2.7e-05	0.000124	0.000133	6.4e-05	0.000145	0.000205	0.000114	0.000268
2341.58	0.000399	0.000107	0.000422	-1e-06	0.000462	0.000211	0.000318	0.000158	0.000293	0.000193	0.000257	0.000226
2343.51	0.000675	0.000156	0.000633	-0.000642	0.001078	0.000402	0.000546	0.000342	0.000481	0.000167	0.000407	0.000128
2345.44	0.000725	0.000207	0.000653	-0.000846	0.001305	0.000538	0.000602	0.000446	0.00054	0.000144	0.000476	8.3e-05
2347.37	0.000433	0.00023	0.000412	-0.000381	0.000832	0.000446	0.000442	0.000397	0.000417	0.00012	0.000365	0.000113
2349.3	-2.3e-05	0.000207	4.9e-05	0.000594	-9.6e-05	0.000171	8.9e-05	0.000179	8.3e-05	0.000175	0.000106	0.00021
2351.23	-0.000411	0.000119	-0.000336	0.001518	-0.001038	-0.000116	-0.000355	-0.000135	-0.000284	0.000272	-0.00016	0.000325
2353.16	-0.00062	3.3e-05	-0.0005	0.001883	-0.001527	-0.000305	-0.000624	-0.000359	-0.000462	0.000334	-0.000298	0.000363
2355.08	-0.000563	2.8e-05	-0.000389	0.001562	-0.00129	-0.000259	-0.000579	-0.00033	-0.000436	0.000268	-0.000218	0.000336
2357.01	-0.000337	0.000126	-8.9e-05	0.000969	-0.000654	-7.6e-05	-0.000275	-0.000139	-0.000226	0.000165	-3.7e-05	0.000304
2358.94	-8.2e-05	0.000128	7.5e-05	0.000438	-0.000178	-2e-06	1.7e-05	6.4e-05	-2.8e-05	0.000109	0.000113	0.000258
2360.87	0.000107	0.000133	0.00018	-7.8e-05	0.000232	0.000106	0.00024	0.000225	0.000146	4.8e-05	0.000223	0.000214
2362.8	0.000331	0.000197	0.000381	-0.000556	0.000724	0.000282	0.000427	0.000341	0.000339	5.8e-05	0.000305	0.000149
2364.73	0.000582	0.000204	0.000537	-0.000942	0.001151	0.000395	0.000575	0.000432	0.00054	0.000109	0.000375	3.1e-05
2366.66	0.000808	0.000177	0.000633	-0.00116	0.001434	0.000412	0.000724	0.000527	0.000639	0.000135	0.000467	-4.7e-05
2368.59	0.000945	0.000159	0.000622	-0.001262	0.001531	0.000436	0.000814	0.000596	0.000658	9.5e-05	0.000558	-3.4e-05
2370.51	0.000991	0.000158	0.000575	-0.001295	0.001477	0.00045	0.000846	0.000616	0.000687	0.000122	0.000581	1.9e-05
2372.44	0.000944	0.000142	0.000481	-0.001251	0.001318	0.000457	0.000774	0.000594	0.000672	0.000177	0.000565	6e-05
2374.37	0.000753	0.000192	0.000491	-0.001248	0.001269	0.000517	0.000695	0.000535	0.000709	0.000152	0.000531	7.3e-05
2376.3	0.000578	0.000209	0.000531	-0.001264	0.001227	0.000488	0.000674	0.000485	0.000744	0.000133	0.000463	1.9e-05
2378.23	0.000447	0.000129	0.000388	-0.001227	0.001041	0.000361	0.000645	0.000453	0.000665	7.9e-05	0.000403	-5.7e-05
2380.16	0.000315	4.9e-05	0.000145	-0.001118	0.000765	0.000227	0.00056	0.00042	0.000496	-1.1e-05	0.000354	-6.8e-05
2382.09	0.000182	5e-06	-6.1e-05	-0.00091	0.000475	0.000142	0.000423	0.000375	0.000343	-3e-05	0.0003	-4.9e-05
2384.02	9.1e-05	-5e-06	-0.000142	-0.000631	0.000264	0.000107	0.000303	0.000318	0.000239	3.2e-05	0.000237	-1e-05
2385.95	8.8e-05	1.9e-05	-0.000101	-0.000334	0.000178	9.8e-05	0.000246	0.000272	0.000197	0.000112	0.000198	5e-05
2387.87	0.000112	7.6e-05	7e-06	-8.6e-05	0.00018	0.000134	0.000234	0.000239	0.000213	0.000167	0.000196	0.000122
2389.8	0.000141	0.000159	0.000138	6e-05	0.0002	0.000189	0.000244	0.000223	0.000237	0.000182	0.000211	0.000189
2391.73	0.000183	0.000224	0.00022	0.000139	0.000216	0.000209	0.00026	0.000221	0.00025	0.000176	0.000238	0.000236
2393.66	0.000227	0.000233	0.000237	0.000178	0.000207	0.00021	0.000251	0.00023	0.000247	0.000176	0.00026	0.000258
2395.59	0.00024	0.0002	0.000214	0.000194	0.000183	0.000215	0.000219	0.000242	0.000245	0.000207	0.00025	0.000259
2397.52	0.000214	0.00016	0.000188	0.000198	0.000182	0.000217	0.000204	0.000239	0.000236	0.000232	0.000219	0.000255
2399.45	0.000179	0.000154	0.000182	0.000208	0.000202	0.000217	0.000215	0.000241	0.000211	0.000233	0.000214	0.000246
2401.38	0.000165	0.000184	0.000204	0.000215	0.00022	0.000231	0.000238	0.000241	0.000206	0.000224	0.000233	0.000245
2403.3	0.000179	0.000214	0.000235	0.000214	0.000226	0.000241	0.000277	0.000225	0.000211	0.000216	0.000243	0.000248
2405.23	0.000205	0.000228	0.000228	0.000221	0.000222	0.000248	0.000299	0.000227	0.000224	0.000237	0.000268	0.00025
2407.16	0.000224	0.000225	0.00021	0.000225	0.000218	0.000264	0.000278	0.000255	0.000241	0.000279	0.00029	0.000261
2409.09	0.000204	0.00022	0.000211	0.000223	0.000228	0.000262	0.000242	0.000278	0.000238	0.000304	0.000273	0.000295
2411.02	0.000181	0.000228	0.000211	0.000218	0.000245	0.000244	0.000228	0.000278	0.000209	0.000279	0.000256	0.000325
2412.95	0.000173	0.000251	0.000209	0.000231	0.000247	0.00023	0.000221	0.000272	0.000205	0.000258	0.000243	0.000299
2414.88	0.00018	0.000243	0.000205	0.00023	0.00023	0.000219	0.000229	0.000253	0.000228	0.000265	0.000235	0.000257
2416.81	0.00018	0.000217	0.000195	0.000218	0.000225	0.000223	0.000232	0.000239	0.000253	0.000263	0.000237	0.000237
2418.74	0.000177	0.000201	0.000183	0.000213	0.000233	0.000236	0.000206	0.00025	0.000282	0.000276	0.00025	0.000234
2420.66	0.000184	0.00021	0.000199	0.000211	0.00024	0.00025	0.000201	0.000263	0.000275	0.000284	0.000271	0.000264
2422.59	0.000189	0.00025	0.000227	0.000224	0.000244	0.000253	0.000233	0.00027	0.000254	0.00027	0.000286	0.000318
2424.52	0.000208	0.00027	0.000233	0.000255	0.000251	0.000244	0.000274	0.000277	0.000245	0.000261	0.000296	0.000335
2426.45	0.000228	0.000255	0.000232	0.000282	0.000248	0.000249	0.000292	0.000284	0.000263	0.000261	0.000309	0.000312
2428.38	0.000246	0.000222	0.000225	0.000279	0.00025	0.000268	0.000291	0.000286	0.00029	0.000267	0.00032	0.000296
2430.31	0.000243	0.000211	0.000212	0.00026	0.000269	0.000291	0.000269	0.000286	0.000311	0.000279	0.000306	0.000278
2432.24	0.000236	0.00022	0.000206	0.00024	0.000261	0.00029	0.000259	0.000292	0.000303	0.000292	0.000286	0.000272
2434.17	0.000236	0.000242	0.000229	0.000245	0.00023	0.000278	0.000276	0.000296	0.000275	0.00029	0.000291	0.000297
2436.09	0.000245	0.000277	0.000271	0.000263	0.000226	0.000275	0.000293	0.000303	0.000262	0.00029	0.000298	0.000338
2438.02	0.000262	0.000283	0.000299	0.000264	0.000261	0.00028	0.000322	0.000309	0.00027	0.000306	0.000302	0.000346
2439.95	0.000274	0.000282	0.000307	0.00026	0.000298	0.000294	0.000351	0.00031	0.000302	0.00033	0.000321	0.00033
2441.88	0.000272	0.000287	0.000301	0.000275	0.000335	0.000305	0.000361	0.00031	0.000337	0.000356	0.000332	0.000307
2443.81	0.000271	0.000267	0.000283	0.000292	0.000343	0.000311	0.000341	0.000301	0.000361	0.00036	0.000347	0.000298
2445.74	0.000299	0.00024	0.000272	0.000298	0.000306	0.000306	0.00032	0.0003	0.000359	0.000327	0.000346	0.000315
2447.67	0.000307	0.000241	0.000284	0.000304	0.000268	0.000308	0.000289	0.000307	0.000328	0.000286	0.00032	0.000337
2449.6	0.000281	0.000255	0.000289	0.000305	0.000264	0.000311	0.000272	0.00032	0.000284	0.000274	0.000302	0.000366
2451.53	0.000255	0.000255	0.000267	0.000288	0.000285	0.000297	0.000289	0.000333	0.000261	0.000286	0.000304	0.00037
2453.45	0.000235	0.000263	0.000249	0.000262	0.000301	0.000282	0.000295	0.000343	0.000249	0.000305	0.000316	0.00035
2455.38	0.000234	0.000281	0.000248	0.000247	0.000312	0.000286	0.000292	0.000331	0.000259	0.000312	0.000318	0.00033
2457.31	0.000243	0.000287	0.000247	0.000249	0.000302	0.000299	0.000297	0.000301	0.000294	0.000309	0.000329	0.00032
2459.24	0.000249	0.000291	0.000254	0.000273	0.000273	0.000305	0.000312	0.000298	0.00031	0.000308	0.000319	0.000318
2461.17	0.000244	0.000292	0.000259	0.000302	0.000258	0.00031	0.000312	0.000303	0.000309	0.000307	0.000314	0.000331
2463.1	0.000241	0.000276	0.000255	0.000311	0.000265	0.000304	0.000309	0.000304	0.000297	0.000302	0.000327	0.000342
2465.03	0.00024	0.000267	0.000238	0.000287	0.000295	0.000292	0.000285	0.000307	0.000281	0.000303	0.000311	0.000341
2466.96	0.000233	0.000273	0.000227	0.000248	0.000305	0.000279	0.000249	0.000308	0.000268	0.000308	0.000281	0.000336
2468.88	0.000226	0.000277	0.000238	0.00024	0.000285	0.000286	0.000245	0.000298	0.000273	0.000307	0.000279	0.000328
2470.81	0.000224	0.000268	0.000249	0.000265	0.000267	0.000308	0.000257	0.000288	0.000288	0.000318	0.000303	0.000315
2472.74	0.00025	0.000269	0.000259	0.000289	0.000259	0.000315	0.000278	0.000296	0.000314	0.000334	0.000331	0.0003
2474.67	0.000281	0.000286	0.000268	0.000304	0.000269	0.000321	0.00031	0.000315	0.000346	0.000323	0.000352	0.000302
2476.6	0.000276	0.000289	0.00027	0.000317	0.000288	0.000329	0.000334	0.000342	0.00037	0.00032	0.000357	0.000324
2478.53	0.000255	0.000279	0.000266	0.000312	0.000311	0.000322	0.000346	0.000358	0.000391	0.000334	0.000336	0.000363
2480.46	0.00025	0.00027	0.000282	0.000285	0.000326	0.000326	0.000349	0.000341	0.000372	0.000349	0.000335	0.000389
2482.39	0.000252	0.000265	0.000305	0.000268	0.000319	0.000356	0.000338	0.000315	0.000324	0.000352	0.000349	0.000374
2484.32	0.000265	0.000258	0.000291	0.000258	0.000309	0.00036	0.000315	0.000299	0.000278	0.000346	0.000337	0.000328
2486.24	0.000282	0.000265	0.00027	0.000258	0.000304	0.000325	0.000319	0.000314	0.000251	0.000346	0.000346	0.000306
2488.17	0.000289	0.000273	0.000255	0.000276	0.000313	0.000298	0.000342	0.000349	0.000266	0.000352	0.000361	0.000322
2490.1	0.000284	0.000266	0.000248	0.000285	0.000322	0.000278	0.000356	0.000366	0.000309	0.000372	0.000362	0.00036
2492.03	0.000275	0.000271	0.000263	0.000278	0.000329	0.000271	0.000355	0.000354	0.000337	0.000353	0.00035	0.000381
2493.96	0.000272	0.000278	0.000277	0.000276	0.00033	0.000311	0.000342	0.000331	0.000329	0.000317	0.000346	0.000372
2495.89	0.000274	0.000274	0.000283	0.000273	0.000303	0.000344	0.000315	0.000321	0.000323	0.000292	0.000341	0.000336
2497.82	0.000276	0.000263	0.00028	0.00026	0.00029	0.000332	0.000294	0.00031	0.000322	0.000274	0.000329	0.000305
2499.75	0.000277	0.000252	0.00027	0.000249	0.000292	0.000297	0.000298	0.000304	0.000331	0.000277	0.000319	0.000303
2501.67	0.000252	0.000243	0.000245	0.000244	0.00028	0.00025	0.000295	0.000313	0.000345	0.000297	0.000285	0.000297
2503.6	0.00021	0.000236	0.000218	0.000239	0.000265	0.00022	0.000276	0.00031	0.000313	0.000302	0.000252	0.000298
2505.53	0.000177	0.000233	0.000207	0.000238	0.00025	0.000228	0.000258	0.000292	0.000252	0.000266	0.000238	0.000306
2507.46	0.000158	0.000233	0.000211	0.000247	0.000238	0.000262	0.000248	0.00028	0.000214	0.00025	0.000262	0.000308
2509.39	0.000157	0.000227	0.000224	0.000256	0.000228	0.000286	0.000246	0.000274	0.000208	0.000278	0.000296	0.000308
2511.32	0.000171	0.000217	0.000228	0.000249	0.000246	0.000297	0.000264	0.000263	0.000228	0.00029	0.000304	0.000298
2513.25	0.000188	0.000231	0.000231	0.000226	0.000266	0.000292	0.000284	0.000264	0.000255	0.000288	0.000282	0.000277
2515.18	0.000193	0.000232	0.000217	0.000209	0.000257	0.000274	0.000272	0.000268	0.000269	0.000278	0.000255	0.000255
2517.1	0.000195	0.000223	0.000194	0.000203	0.000236	0.000271	0.000257	0.00027	0.000267	0.000247	0.000245	0.000247
2519.03	0.000184	0.000231	0.000186	0.000215	0.000217	0.000271	0.000253	0.000284	0.000275	0.00022	0.000238	0.000241
2520.96	0.000169	0.000241	0.000185	0.000241	0.00021	0.000267	0.000245	0.000283	0.000272	0.00022	0.000245	0.000247
2522.89	0.00017	0.000235	0.000191	0.000248	0.000218	0.000266	0.000243	0.000261	0.000245	0.00024	0.000259	0.00026
2524.82	0.000182	0.000219	0.000208	0.000235	0.000247	0.00026	0.000247	0.000254	0.000216	0.000258	0.000261	0.000266
2526.75	0.000201	0.00021	0.000215	0.000232	0.000267	0.000259	0.000255	0.000251	0.000205	0.000268	0.000264	0.000286
2528.68	0.000229	0.000189	0.000204	0.00023	0.000256	0.000263	0.000265	0.000249	0.000222	0.000272	0.000286	0.000308
2530.61	0.000251	0.000205	0.000219	0.000222	0.000257	0.000256	0.000269	0.000271	0.000247	0.000278	0.00031	0.000292
2532.54	0.000259	0.000228	0.000237	0.000224	0.000261	0.00025	0.000263	0.000281	0.000276	0.000268	0.000317	0.000271
2534.46	0.000248	0.000214	0.000225	0.000222	0.000251	0.000239	0.000244	0.000263	0.000289	0.000247	0.000291	0.000263
2536.39	0.000222	0.000196	0.000212	0.000206	0.000243	0.000218	0.000226	0.000251	0.000279	0.000237	0.000227	0.00024
2538.32	0.000207	0.000187	0.000201	0.000186	0.000237	0.000207	0.000225	0.00025	0.000255	0.000229	0.000173	0.000241
2540.25	0.00021	0.000201	0.000204	0.000177	0.000236	0.00023	0.000236	0.000243	0.000245	0.000224	0.000181	0.000257
2542.18	0.000217	0.000232	0.000229	0.000178	0.000227	0.000253	0.000251	0.00025	0.000242	0.000218	0.00022	0.000251
2544.11	0.000209	0.000252	0.000251	0.000208	0.000236	0.000261	0.000261	0.000263	0.000235	0.000215	0.000258	0.000243
2546.04	0.000184	0.000248	0.000253	0.000253	0.000241	0.000278	0.000278	0.000256	0.000245	0.000239	0.00028	0.000257
2547.97	0.00018	0.000234	0.000241	0.000275	0.000239	0.000272	0.000288	0.000249	0.000262	0.000282	0.000282	0.000268
2549.89	0.000201	0.000235	0.000236	0.000267	0.000256	0.000251	0.000271	0.000252	0.000274	0.000314	0.000265	0.000283
2551.82	0.000217	0.000217	0.000219	0.000244	0.000271	0.000236	0.000255	0.00027	0.00029	0.000314	0.000251	0.000311
2553.75	0.000223	0.000198	0.000193	0.000229	0.000282	0.000228	0.000233	0.000292	0.000275	0.00029	0.000266	0.000303
2555.68	0.00021	0.000203	0.000166	0.00022	0.000256	0.000218	0.000205	0.000277	0.000227	0.000264	0.000271	0.000279
2557.61	0.000176	0.000203	0.000136	0.00022	0.00022	0.000224	0.000181	0.000242	0.000211	0.000264	0.00027	0.000283
2559.54	0.000167	0.000211	0.00014	0.000224	0.000194	0.000236	0.00018	0.000217	0.000236	0.000279	0.000284	0.000292
2561.47	0.000201	0.000226	0.000168	0.000217	0.000193	0.00024	0.000197	0.000215	0.000256	0.000259	0.000292	0.000296
2563.4	0.000213	0.000236	0.00021	0.000218	0.000228	0.000244	0.000234	0.000238	0.000276	0.00021	0.000269	0.000307
2565.33	0.000202	0.000232	0.000245	0.000229	0.000257	0.000261	0.000284	0.00027	0.000279	0.000186	0.00025	0.000304
2567.25	0.00021	0.000246	0.000265	0.000245	0.000267	0.000304	0.00031	0.000295	0.000254	0.000237	0.000264	0.000289
2569.18	0.000221	0.000262	0.000271	0.000269	0.000252	0.00033	0.000312	0.000299	0.000237	0.000317	0.00026	0.000289
2571.11	0.000237	0.000267	0.000267	0.000289	0.000234	0.000318	0.000303	0.000303	0.000259	0.000335	0.00027	0.000293
2573.04	0.000254	0.000284	0.000278	0.000283	0.000249	0.000272	0.000291	0.000313	0.000281	0.000322	0.000298	0.000282
2574.97	0.000252	0.000293	0.000277	0.000247	0.000291	0.000226	0.000292	0.000316	0.000287	0.000314	0.000306	0.000299
2576.9	0.000239	0.0003	0.000268	0.000226	0.000327	0.000232	0.000323	0.000332	0.000322	0.00031	0.000328	0.000328
2578.83	0.000246	0.000306	0.000261	0.000249	0.000333	0.0003	0.000353	0.000361	0.000351	0.000316	0.000365	0.000338
2580.76	0.000284	0.000296	0.000263	0.000304	0.000313	0.000375	0.000364	0.000378	0.000343	0.00034	0.000385	0.000364
2582.68	0.000315	0.000269	0.000287	0.000351	0.000309	0.000391	0.000364	0.000373	0.000329	0.000339	0.000384	0.000387
2584.61	0.000327	0.000269	0.00031	0.000358	0.000322	0.000366	0.000358	0.000345	0.000344	0.000342	0.000373	0.000395
2586.54	0.000324	0.000279	0.000314	0.00033	0.000355	0.000333	0.000353	0.000315	0.000358	0.000382	0.000348	0.000404
2588.47	0.000307	0.000292	0.000311	0.000292	0.000377	0.000303	0.000368	0.000308	0.000366	0.000397	0.000342	0.000397
2590.4	0.000278	0.000306	0.000307	0.000284	0.000356	0.000307	0.000378	0.000334	0.000367	0.00038	0.000357	0.00036
2592.33	0.000259	0.000288	0.000305	0.000286	0.000316	0.000324	0.000352	0.000364	0.000351	0.000341	0.000367	0.000339
2594.26	0.000266	0.000252	0.000287	0.000273	0.0003	0.000321	0.000327	0.000381	0.000335	0.000311	0.000369	0.000362
2596.19	0.000276	0.000255	0.00027	0.000261	0.000326	0.000319	0.000324	0.000377	0.00033	0.000302	0.000372	0.000393
2598.12	0.000283	0.000298	0.00027	0.000279	0.000341	0.000347	0.000321	0.000349	0.000321	0.000318	0.000374	0.000412
2600.04	0.000282	0.000341	0.000281	0.000325	0.000342	0.000375	0.000336	0.000332	0.000311	0.000335	0.000386	0.000415
2601.97	0.00027	0.000378	0.000304	0.000352	0.000342	0.000373	0.000373	0.000339	0.000317	0.000353	0.000371	0.000391
2603.9	0.000275	0.000371	0.000305	0.000338	0.000331	0.000361	0.000374	0.000351	0.000323	0.000373	0.00033	0.000361
2605.83	0.000293	0.000327	0.000289	0.000319	0.000316	0.000353	0.000335	0.000364	0.000334	0.000369	0.000315	0.000348
2607.76	0.000295	0.000273	0.000262	0.000308	0.000314	0.000342	0.00031	0.000377	0.000342	0.000362	0.000319	0.00035
2609.69	0.000271	0.000248	0.000258	0.000303	0.000305	0.000337	0.000292	0.000351	0.000335	0.000349	0.00035	0.000352
2611.62	0.000254	0.000259	0.000272	0.000317	0.000269	0.000336	0.000283	0.000316	0.000328	0.000337	0.00039	0.000362
2613.55	0.000258	0.000285	0.000289	0.000323	0.000265	0.000326	0.000324	0.00031	0.000342	0.000346	0.000401	0.000375
2615.47	0.000288	0.000326	0.000311	0.000312	0.000309	0.000334	0.000375	0.000328	0.000358	0.000376	0.000396	0.000375
2617.4	0.000323	0.00036	0.000314	0.000324	0.000365	0.000363	0.000381	0.000368	0.000364	0.000406	0.000402	0.00039
2619.33	0.000326	0.000366	0.00032	0.000349	0.000422	0.000386	0.000359	0.000416	0.000355	0.000413	0.000407	0.000398
2621.26	0.000326	0.000348	0.000321	0.00035	0.000449	0.000377	0.000342	0.00042	0.000368	0.000404	0.000395	0.000385
2623.19	0.000322	0.000335	0.000325	0.000351	0.000421	0.000361	0.000343	0.000394	0.000393	0.000376	0.000376	0.000389
2625.12	0.000329	0.000332	0.000348	0.000353	0.00038	0.000354	0.000365	0.000403	0.00038	0.000365	0.00034	0.000416
2627.05	0.000337	0.000329	0.000372	0.000335	0.000364	0.000355	0.000404	0.000404	0.000355	0.000369	0.000323	0.000418
2628.98	0.000337	0.000331	0.000368	0.000321	0.000358	0.000367	0.000418	0.00038	0.000351	0.000356	0.000342	0.000385
2630.91	0.000315	0.000322	0.000332	0.000311	0.000355	0.000361	0.000386	0.000367	0.000345	0.000329	0.000356	0.000343
2632.83	0.000284	0.000304	0.00029	0.000293	0.000336	0.000333	0.00034	0.000355	0.000336	0.000319	0.000363	0.000311
2634.76	0.000281	0.000301	0.000263	0.000306	0.000312	0.000313	0.000316	0.000335	0.000367	0.000358	0.000366	0.000337
2636.69	0.000299	0.000317	0.000284	0.000335	0.000308	0.000314	0.000316	0.000334	0.000386	0.000395	0.000378	0.000401
2638.62	0.000334	0.000351	0.000349	0.000345	0.000315	0.000339	0.00034	0.000349	0.000386	0.000412	0.000391	0.000432
2640.55	0.000343	0.000346	0.00037	0.000338	0.000314	0.00038	0.000372	0.00034	0.000396	0.000399	0.000388	0.000401
2642.48	0.000324	0.000315	0.000349	0.000318	0.000321	0.000395	0.000384	0.000342	0.000381	0.000355	0.00038	0.000359
2644.41	0.000284	0.000293	0.000324	0.000281	0.000332	0.000374	0.000372	0.000366	0.000339	0.000316	0.000374	0.000349
2646.34	0.00025	0.000284	0.000291	0.000274	0.00034	0.000346	0.000346	0.000376	0.000306	0.000314	0.00035	0.000347
2648.26	0.00024	0.000291	0.000274	0.000303	0.000358	0.000321	0.000312	0.000353	0.000283	0.000332	0.000337	0.000349
2650.19	0.000259	0.0003	0.000275	0.000323	0.00036	0.000311	0.000293	0.000314	0.000274	0.000353	0.000351	0.000358
2652.12	0.00029	0.000318	0.00028	0.00034	0.000326	0.000319	0.000303	0.000288	0.00031	0.000358	0.000342	0.000368
2654.05	0.000323	0.000343	0.000286	0.000357	0.000301	0.000327	0.000318	0.000291	0.000352	0.000352	0.000323	0.000373
2655.98	0.000352	0.000382	0.000316	0.000359	0.000305	0.000333	0.000356	0.000324	0.000379	0.000357	0.000339	0.000404
2657.91	0.000351	0.000399	0.000345	0.000342	0.000325	0.000356	0.000382	0.000375	0.000387	0.000351	0.000363	0.000402
2659.84	0.000327	0.000367	0.000324	0.000336	0.000356	0.000395	0.000369	0.000401	0.000379	0.000339	0.000358	0.000353
2661.77	0.000291	0.000321	0.000301	0.000321	0.000379	0.000409	0.000351	0.000389	0.000383	0.000341	0.000378	0.000333
2663.69	0.000273	0.000305	0.000308	0.000323	0.000393	0.000393	0.00034	0.000371	0.000397	0.000367	0.000398	0.000348
2665.62	0.00028	0.000321	0.000314	0.000353	0.000386	0.000356	0.000335	0.000349	0.000404	0.000386	0.00038	0.000359
2667.55	0.000306	0.000324	0.000305	0.000355	0.000374	0.000322	0.000341	0.00035	0.000389	0.000393	0.00035	0.000379
2669.48	0.000342	0.000311	0.000288	0.000328	0.000367	0.000312	0.000364	0.000367	0.000362	0.000398	0.000337	0.000406
2671.41	0.000339	0.000294	0.000276	0.000312	0.000354	0.000323	0.000367	0.00037	0.000338	0.000366	0.00034	0.000388
2673.34	0.000308	0.00028	0.000264	0.000311	0.000341	0.000355	0.000367	0.000379	0.000327	0.000333	0.000358	0.000371
2675.27	0.000286	0.000301	0.000293	0.000317	0.000325	0.000373	0.000384	0.000393	0.000331	0.000356	0.0004	0.000373
2677.2	0.000299	0.000344	0.000351	0.000348	0.000345	0.000393	0.000404	0.000398	0.000359	0.00039	0.000422	0.000393
2679.13	0.000341	0.000367	0.000376	0.000368	0.000395	0.000403	0.000404	0.000394	0.000406	0.000399	0.000411	0.00043
2681.05	0.000359	0.000381	0.000393	0.000351	0.000418	0.000403	0.000397	0.000397	0.000428	0.000412	0.000398	0.000465
2682.98	0.000356	0.000374	0.000393	0.000324	0.00041	0.000397	0.000385	0.0004	0.000403	0.000419	0.000402	0.000459
2684.91	0.000331	0.000325	0.000341	0.000303	0.00037	0.000381	0.000365	0.000406	0.000371	0.000388	0.000395	0.000403
2686.84	0.000315	0.000269	0.000272	0.000305	0.000328	0.000369	0.000365	0.00041	0.00036	0.00035	0.000379	0.000337
2688.77	0.000325	0.00026	0.00026	0.000316	0.000326	0.00035	0.000385	0.000374	0.00036	0.000338	0.000365	0.000332
2690.7	0.000335	0.000286	0.000289	0.000335	0.000364	0.000343	0.000398	0.00034	0.000375	0.000348	0.000358	0.000392
2692.63	0.000326	0.000326	0.000327	0.000357	0.000393	0.000347	0.000395	0.000357	0.000379	0.000368	0.000365	0.000429
2694.56	0.000291	0.000369	0.000368	0.00036	0.000382	0.000381	0.000401	0.000409	0.000371	0.000405	0.000392	0.000429
2696.48	0.000292	0.000379	0.000366	0.000358	0.000385	0.000421	0.000394	0.000471	0.000393	0.000446	0.000416	0.000419
2698.41	0.000317	0.000373	0.000337	0.000368	0.000402	0.000433	0.000383	0.000493	0.000429	0.00047	0.000435	0.000439
2700.34	0.000338	0.000372	0.000339	0.000385	0.000404	0.000433	0.000387	0.000462	0.000441	0.000473	0.000453	0.000493
2702.27	0.000359	0.000377	0.000347	0.000391	0.000406	0.000432	0.000396	0.000408	0.000419	0.000452	0.000459	0.000553
2704.2	0.000374	0.00039	0.000349	0.000424	0.000399	0.00043	0.000392	0.000384	0.000408	0.000427	0.000468	0.000564
2706.13	0.000407	0.000429	0.000388	0.000466	0.000421	0.000439	0.000416	0.000422	0.000436	0.00041	0.0005	0.000499
2708.06	0.000448	0.000487	0.000453	0.00049	0.000485	0.000475	0.000481	0.000474	0.000494	0.00047	0.000548	0.000453
2709.99	0.000498	0.00054	0.000524	0.000508	0.000571	0.000515	0.000529	0.000527	0.000577	0.000561	0.000575	0.000476
2711.92	0.000534	0.000577	0.000575	0.000523	0.00063	0.00055	0.000568	0.000589	0.000631	0.000613	0.000583	0.00055
2713.84	0.000531	0.000565	0.00056	0.000548	0.000632	0.000599	0.000614	0.000626	0.000642	0.000629	0.000586	0.000619
2715.77	0.000511	0.000525	0.000497	0.00056	0.000604	0.00062	0.00064	0.000617	0.000604	0.000602	0.000592	0.000644
2717.7	0.000491	0.000503	0.000451	0.000543	0.000557	0.00057	0.000605	0.000582	0.000552	0.000566	0.000573	0.000634
2719.63	0.000479	0.000478	0.000433	0.000492	0.000515	0.000491	0.000546	0.000542	0.000515	0.000542	0.000559	0.00059
2721.56	0.000468	0.000448	0.000432	0.000437	0.000474	0.000466	0.000494	0.000511	0.000529	0.000546	0.000553	0.000557
2723.49	0.00047	0.000454	0.000469	0.000411	0.000468	0.0005	0.000468	0.000524	0.000609	0.000579	0.00056	0.000543
2725.42	0.00049	0.000479	0.000513	0.000444	0.000502	0.000551	0.000532	0.000564	0.000636	0.000605	0.000586	0.000559
2727.35	0.000514	0.000511	0.000542	0.000513	0.000549	0.000607	0.000619	0.000591	0.000573	0.000599	0.000599	0.000579
2729.27	0.000536	0.000548	0.000553	0.000554	0.000586	0.000612	0.000646	0.00059	0.000506	0.000574	0.000582	0.000572
2731.2	0.000527	0.00055	0.000512	0.000536	0.000578	0.000557	0.000587	0.000559	0.000471	0.000553	0.000536	0.000566
2733.13	0.000479	0.000504	0.000457	0.000492	0.000521	0.000503	0.000497	0.00051	0.000454	0.000519	0.000509	0.000541
2735.06	0.000425	0.000451	0.000435	0.000437	0.00046	0.000481	0.000431	0.00045	0.000474	0.000486	0.000487	0.000506
2736.99	0.000393	0.000415	0.000424	0.000406	0.000428	0.000462	0.000402	0.000417	0.000496	0.000478	0.000448	0.000465
2738.92	0.000383	0.000378	0.000391	0.000396	0.000419	0.000427	0.000406	0.000425	0.000469	0.000453	0.000401	0.00044
2740.85	0.000372	0.000345	0.000346	0.000373	0.000429	0.000415	0.000397	0.000448	0.000415	0.000404	0.000375	0.00042
2742.78	0.000334	0.000333	0.000312	0.000331	0.000427	0.000415	0.000398	0.000461	0.0004	0.000391	0.000385	0.00041
2744.71	0.000302	0.000338	0.000317	0.000314	0.000424	0.000426	0.000431	0.000454	0.000403	0.000401	0.000439	0.000445
2746.63	0.000311	0.000386	0.000386	0.000388	0.000452	0.000478	0.000493	0.000467	0.000435	0.000428	0.000506	0.000511
2748.56	0.000381	0.000448	0.000445	0.000495	0.000513	0.000546	0.000551	0.000514	0.000532	0.000508	0.000553	0.000562
2750.49	0.000481	0.00051	0.000477	0.000577	0.00057	0.000588	0.000564	0.000571	0.000631	0.000598	0.000558	0.000584
2752.42	0.000545	0.000558	0.000496	0.000591	0.000599	0.000602	0.000552	0.000621	0.00065	0.000619	0.000551	0.000585
2754.35	0.000554	0.000565	0.00051	0.000553	0.000576	0.000593	0.000535	0.000641	0.000598	0.000595	0.000577	0.000565
2756.28	0.000508	0.000541	0.000496	0.000514	0.000539	0.000557	0.00056	0.000609	0.000553	0.000574	0.000608	0.000565
2758.21	0.00047	0.000513	0.000477	0.000503	0.000538	0.000541	0.0006	0.000571	0.000546	0.000537	0.000622	0.000602
2760.14	0.000471	0.000516	0.000491	0.000536	0.000559	0.000565	0.000617	0.000568	0.000563	0.000527	0.000605	0.000635
2762.06	0.000498	0.000533	0.000507	0.00057	0.000589	0.000591	0.000616	0.000569	0.000611	0.000579	0.000579	0.000643
2763.99	0.000553	0.000582	0.000562	0.000586	0.000632	0.000623	0.000625	0.000591	0.000651	0.000648	0.000559	0.000634
2765.92	0.00061	0.00063	0.00063	0.00059	0.000667	0.000666	0.000643	0.000649	0.000657	0.00069	0.000609	0.000616
2767.85	0.000631	0.00064	0.000662	0.000589	0.000675	0.000691	0.000658	0.000682	0.000661	0.000698	0.000703	0.000644
2769.78	0.000627	0.000669	0.000663	0.000602	0.000691	0.000697	0.000669	0.000674	0.000686	0.000692	0.000765	0.000715
2771.71	0.000654	0.000689	0.000652	0.000644	0.000726	0.000711	0.000679	0.000687	0.000752	0.000697	0.000816	0.000768
2773.64	0.000692	0.000677	0.000645	0.000699	0.000759	0.000719	0.000729	0.000718	0.000822	0.000758	0.000846	0.000803
2775.57	0.000728	0.000683	0.000666	0.000737	0.000785	0.000717	0.000786	0.000757	0.000875	0.000852	0.000825	0.000823
2777.5	0.000772	0.000715	0.000708	0.000774	0.000804	0.000743	0.00082	0.000808	0.000869	0.000884	0.000789	0.000825
2779.42	0.00078	0.000763	0.000748	0.000785	0.000817	0.000788	0.000853	0.000857	0.000817	0.000868	0.000799	0.000856
2781.35	0.000742	0.000799	0.000789	0.000764	0.000808	0.000821	0.000884	0.00086	0.000792	0.00087	0.000839	0.000906
2783.28	0.000721	0.000814	0.000816	0.000759	0.000804	0.000836	0.00088	0.000853	0.000813	0.000894	0.000891	0.000924
2785.21	0.00075	0.000813	0.000798	0.000775	0.000847	0.000865	0.000863	0.000894	0.00089	0.000909	0.000953	0.000961
2787.14	0.000809	0.000818	0.00078	0.000823	0.000904	0.000896	0.000877	0.000962	0.000977	0.000946	0.000983	0.001033
2789.07	0.000901	0.00086	0.00081	0.000915	0.000952	0.000929	0.000883	0.001	0.001033	0.001004	0.00099	0.001071
2791	0.000972	0.000902	0.000872	0.001002	0.000984	0.000982	0.0009	0.001008	0.001052	0.001036	0.001014	0.001054
2792.93	0.000954	0.000956	0.000955	0.001032	0.000975	0.001002	0.000972	0.000998	0.001061	0.001065	0.001052	0.001023
2794.85	0.000908	0.001005	0.001028	0.001037	0.000947	0.001012	0.001034	0.000963	0.001068	0.001094	0.001084	0.001005
2796.78	0.000915	0.001062	0.001058	0.001051	0.000983	0.001044	0.001051	0.000992	0.00107	0.001099	0.001133	0.001032
2798.71	0.000985	0.001137	0.001071	0.001068	0.001069	0.001099	0.00108	0.001088	0.001123	0.001142	0.001187	0.001144
2800.64	0.001104	0.001167	0.001092	0.001114	0.001146	0.001166	0.001142	0.001165	0.001218	0.001251	0.001217	0.001286
2802.57	0.001209	0.00119	0.001126	0.001167	0.001196	0.001236	0.001179	0.001201	0.001313	0.001354	0.001264	0.001376
2804.5	0.001256	0.001228	0.001181	0.001212	0.001226	0.001288	0.001205	0.001252	0.001385	0.001403	0.001324	0.001423
2806.43	0.001286	0.001286	0.001222	0.001278	0.001274	0.001315	0.001256	0.001294	0.001431	0.00143	0.001391	0.001473
2808.36	0.00135	0.001375	0.00128	0.001383	0.001377	0.001358	0.001305	0.001344	0.00146	0.001451	0.001482	0.001523
2810.28	0.001435	0.001474	0.001382	0.001488	0.001475	0.001393	0.001367	0.001429	0.001511	0.001499	0.001592	0.001558
2812.21	0.001492	0.001534	0.001475	0.001553	0.001504	0.001438	0.001447	0.001483	0.00161	0.001593	0.001662	0.001595
2814.14	0.001528	0.001531	0.001524	0.001589	0.001534	0.001516	0.001527	0.001502	0.001688	0.001683	0.001707	0.001655
2816.07	0.001563	0.001564	0.001579	0.001625	0.001586	0.001599	0.001609	0.001531	0.001751	0.001747	0.001759	0.001734
2818	0.001649	0.001662	0.001673	0.001681	0.001655	0.001671	0.001682	0.001624	0.001846	0.001815	0.001823	0.001854
2819.93	0.001827	0.001833	0.001799	0.001806	0.001783	0.001773	0.001791	0.00177	0.002	0.001958	0.001956	0.001999
2821.86	0.00202	0.00207	0.002012	0.001994	0.001942	0.001928	0.001946	0.001962	0.0022	0.002144	0.002147	0.002118
2823.79	0.002191	0.002284	0.002247	0.002194	0.002114	0.002118	0.002115	0.002136	0.002385	0.002339	0.002374	0.00225
2825.72	0.002358	0.002439	0.002415	0.002406	0.002315	0.00233	0.00229	0.002286	0.002553	0.002537	0.002581	0.002444
2827.64	0.002553	0.002611	0.002581	0.002641	0.002521	0.002556	0.00248	0.002457	0.002745	0.002757	0.002758	0.002717
2829.57	0.00279	0.002889	0.002808	0.002906	0.002744	0.00279	0.002722	0.002671	0.003028	0.003023	0.003008	0.003053
2831.5	0.003147	0.003271	0.003158	0.003261	0.003088	0.003087	0.003044	0.003041	0.003441	0.003422	0.003427	0.003471
2833.43	0.003744	0.003833	0.003717	0.00381	0.003645	0.003585	0.00355	0.003599	0.004026	0.004066	0.004068	0.004005
2835.36	0.004649	0.004726	0.004598	0.004653	0.00448	0.00439	0.004342	0.004359	0.004899	0.004987	0.00502	0.004808
2837.29	0.005967	0.006067	0.005876	0.005956	0.005685	0.005581	0.005521	0.005427	0.006212	0.006316	0.00635	0.006074
2839.22	0.007928	0.008073	0.007803	0.007918	0.007451	0.007346	0.00723	0.007055	0.008212	0.008292	0.008196	0.008
2841.15	0.010742	0.011011	0.010637	0.010784	0.010036	0.009931	0.009732	0.009483	0.01112	0.011116	0.010896	0.010796
2843.07	0.013865	0.014301	0.013785	0.013972	0.012978	0.012869	0.01255	0.012217	0.014336	0.014337	0.014102	0.013937
2845	0.015334	0.015817	0.015314	0.015473	0.014325	0.014278	0.01382	0.013575	0.015892	0.016005	0.015813	0.015568
2846.93	0.013293	0.013687	0.013366	0.013494	0.012333	0.012399	0.011985	0.011862	0.013965	0.014177	0.014027	0.013816
2848.86	0.007931	0.00811	0.008064	0.008156	0.007244	0.007404	0.007204	0.00718	0.008632	0.00886	0.008824	0.008704
2850.79	0.001258	0.001169	0.001369	0.001443	0.000983	0.001232	0.001257	0.001369	0.00184	0.001996	0.002049	0.002083
2852.72	-0.004134	-0.004406	-0.004051	-0.004071	-0.003951	-0.003673	-0.003491	-0.00328	-0.003755	-0.003717	-0.003642	-0.003453
2854.65	-0.006588	-0.006877	-0.006541	-0.006624	-0.006011	-0.005778	-0.005543	-0.00531	-0.006395	-0.006435	-0.006332	-0.006149
2856.58	-0.006417	-0.006629	-0.006444	-0.006532	-0.005593	-0.005437	-0.005281	-0.005036	-0.00633	-0.006346	-0.006266	-0.006177
2858.51	-0.005158	-0.00532	-0.005204	-0.005329	-0.004244	-0.004164	-0.004081	-0.003839	-0.005041	-0.005084	-0.005035	-0.004958
2860.43	-0.003644	-0.003793	-0.003701	-0.003784	-0.002754	-0.002767	-0.002617	-0.00251	-0.003473	-0.003593	-0.00353	-0.003452
2862.36	-0.001968	-0.002127	-0.002057	-0.002073	-0.001214	-0.001289	-0.001108	-0.001086	-0.0018	-0.001979	-0.001862	-0.0018
2864.29	-0.000406	-0.000525	-0.000488	-0.000489	0.000158	0.000107	0.000226	0.000234	-0.000213	-0.000423	-0.000317	-0.000263
2866.22	0.000687	0.000642	0.00064	0.00064	0.001074	0.001067	0.001112	0.001089	0.000872	0.000756	0.000786	0.000765
2868.15	0.001109	0.001093	0.00105	0.0011	0.001374	0.001352	0.001323	0.00136	0.001214	0.001223	0.001174	0.001085
2870.08	0.000879	0.000882	0.000799	0.00085	0.001027	0.001026	0.000977	0.001035	0.000942	0.000938	0.000853	0.000805
2872.01	0.000261	0.000284	0.00023	0.000232	0.000324	0.000349	0.000353	0.000369	0.000291	0.000218	0.000198	0.00021
2873.94	-0.000318	-0.000281	-0.000279	-0.000277	-0.00028	-0.000293	-0.000244	-0.000233	-0.000379	-0.000493	-0.000421	-0.000337
2875.86	-0.00054	-0.000512	-0.000458	-0.000462	-0.000595	-0.000618	-0.000584	-0.000494	-0.0007	-0.000834	-0.000723	-0.000584
2877.79	-0.000345	-0.000307	-0.000263	-0.000274	-0.000523	-0.000505	-0.000527	-0.000361	-0.000637	-0.000707	-0.000573	-0.00048
2879.72	0.000142	0.000208	0.000201	0.00018	-9.1e-05	-5.3e-05	-0.000102	4.8e-05	-0.000228	-0.000153	-0.000101	-6.3e-05
2881.65	0.000763	0.000805	0.000779	0.000749	0.000546	0.000529	0.000483	0.000605	0.000504	0.00063	0.00052	0.000599
2883.58	0.001407	0.00143	0.001353	0.001374	0.001192	0.001162	0.001119	0.001132	0.001382	0.001469	0.00125	0.001322
2885.51	0.002024	0.002019	0.001916	0.002007	0.001834	0.001776	0.001727	0.001624	0.002152	0.002212	0.002001	0.001983
2887.44	0.002543	0.002536	0.002434	0.002556	0.002383	0.002313	0.002248	0.002116	0.00271	0.002765	0.002635	0.00256
2889.37	0.002903	0.002954	0.00284	0.003	0.002728	0.00272	0.002641	0.002556	0.003076	0.003135	0.003122	0.00302
2891.3	0.003134	0.003251	0.003173	0.00332	0.003017	0.003036	0.002925	0.002947	0.003306	0.003401	0.003493	0.003378
2893.22	0.003344	0.00346	0.003482	0.003531	0.003341	0.003314	0.003174	0.00329	0.003582	0.003738	0.003795	0.003674
2895.15	0.003608	0.003652	0.003742	0.003763	0.003639	0.003598	0.003409	0.00355	0.003948	0.00407	0.004074	0.003929
2897.08	0.003921	0.003958	0.003983	0.00403	0.003894	0.003909	0.003731	0.003715	0.004292	0.004346	0.004302	0.004171
2899.01	0.00429	0.00438	0.004271	0.004352	0.004172	0.004225	0.004118	0.003943	0.004654	0.004622	0.004548	0.004541
2900.94	0.004771	0.004894	0.004679	0.004818	0.004551	0.004614	0.004536	0.00439	0.005096	0.004998	0.004956	0.005042
2902.87	0.005464	0.005574	0.005351	0.005517	0.00517	0.005183	0.00516	0.005091	0.005695	0.005635	0.005682	0.005716
2904.8	0.006556	0.006653	0.006492	0.006626	0.006235	0.006175	0.00618	0.006196	0.006688	0.00675	0.0068	0.006741
2906.73	0.008384	0.008502	0.00832	0.008425	0.008003	0.00788	0.007801	0.007842	0.008471	0.008646	0.008568	0.008393
2908.65	0.011022	0.011195	0.010957	0.011002	0.010524	0.010411	0.010152	0.010101	0.011163	0.011386	0.01119	0.010971
2910.58	0.013543	0.013836	0.013543	0.013567	0.012975	0.012933	0.012514	0.012383	0.013905	0.014141	0.013856	0.013738
2912.51	0.014221	0.014591	0.014318	0.014332	0.013637	0.013683	0.013201	0.013086	0.014935	0.015103	0.014892	0.014735
2914.44	0.012049	0.012339	0.012226	0.012237	0.011406	0.011612	0.011246	0.011181	0.012958	0.013045	0.013006	0.012828
2916.37	0.007522	0.007693	0.007741	0.007813	0.006867	0.0072	0.007205	0.007076	0.008384	0.008507	0.008512	0.008504
2918.3	0.002356	0.002365	0.002549	0.002605	0.001774	0.002204	0.002471	0.002364	0.003031	0.003141	0.003076	0.003269
2920.23	-0.001651	-0.00185	-0.001586	-0.001604	-0.002046	-0.001601	-0.00135	-0.001323	-0.001282	-0.001198	-0.0013	-0.001086
2922.16	-0.003808	-0.004198	-0.003862	-0.00395	-0.003868	-0.003544	-0.003414	-0.003322	-0.003783	-0.003599	-0.003741	-0.003577
2924.09	-0.004764	-0.005243	-0.004977	-0.005032	-0.004479	-0.004383	-0.004328	-0.004128	-0.004947	-0.004746	-0.004895	-0.004845
2926.01	-0.005502	-0.005947	-0.005801	-0.005812	-0.004955	-0.005095	-0.005027	-0.004764	-0.005737	-0.005696	-0.005669	-0.005812
2927.94	-0.006346	-0.006607	-0.00648	-0.00649	-0.005586	-0.005808	-0.0057	-0.005427	-0.006544	-0.006707	-0.006516	-0.00653
2929.87	-0.007107	-0.007157	-0.007067	-0.007129	-0.006164	-0.006406	-0.006246	-0.005982	-0.007206	-0.00749	-0.007307	-0.007154
2931.8	-0.007658	-0.007648	-0.007559	-0.007737	-0.006596	-0.006815	-0.006663	-0.006464	-0.007701	-0.008054	-0.007867	-0.007749
2933.73	-0.008007	-0.008038	-0.007941	-0.008133	-0.006946	-0.007065	-0.00691	-0.006898	-0.008083	-0.008379	-0.00823	-0.008191
2935.66	-0.008056	-0.008234	-0.00813	-0.008232	-0.007135	-0.007158	-0.006964	-0.007109	-0.008228	-0.008385	-0.008345	-0.008333
2937.59	-0.00781	-0.00805	-0.007997	-0.008003	-0.007001	-0.006988	-0.006835	-0.006876	-0.008009	-0.008152	-0.008074	-0.007996
2939.52	-0.00724	-0.007417	-0.007396	-0.007382	-0.006442	-0.006423	-0.006393	-0.006297	-0.007401	-0.007576	-0.007374	-0.00723
2941.44	-0.006265	-0.006363	-0.006398	-0.006366	-0.005465	-0.005474	-0.005586	-0.005362	-0.006365	-0.00647	-0.006391	-0.006124
2943.37	-0.004898	-0.004985	-0.005141	-0.005027	-0.004149	-0.004274	-0.004386	-0.004146	-0.0049	-0.004928	-0.005055	-0.004751
2945.3	-0.003347	-0.003465	-0.003597	-0.003481	-0.002699	-0.002919	-0.002893	-0.002811	-0.003261	-0.003273	-0.003423	-0.003197
2947.23	-0.001861	-0.001957	-0.002011	-0.001949	-0.001323	-0.001501	-0.001375	-0.001427	-0.001649	-0.001626	-0.001821	-0.001691
2949.16	-0.000651	-0.000732	-0.000732	-0.000769	-0.000189	-0.00027	-0.000123	-0.000271	-0.000338	-0.000314	-0.000456	-0.000475
2951.09	6.2e-05	-2.5e-05	4.6e-05	-0.000152	0.000467	0.000448	0.000616	0.000394	0.000356	0.000323	0.000322	0.000244
2953.02	0.000193	8.6e-05	0.00016	-9.4e-05	0.000487	0.000533	0.000725	0.00051	0.000394	0.00034	0.00038	0.000254
2954.95	-0.000322	-0.000396	-0.000366	-0.000547	-2.7e-05	5.7e-05	0.000214	0.000108	-0.000168	-0.000234	-0.000237	-0.000295
2956.87	-0.001303	-0.001336	-0.00131	-0.001375	-0.000901	-0.000857	-0.000694	-0.000734	-0.001206	-0.001301	-0.001312	-0.001215
2958.8	-0.002406	-0.002408	-0.002362	-0.002355	-0.001934	-0.001924	-0.001797	-0.001782	-0.002456	-0.002527	-0.002438	-0.002325
2960.73	-0.003458	-0.003392	-0.003355	-0.003333	-0.002934	-0.002953	-0.002906	-0.002818	-0.003611	-0.003637	-0.003473	-0.00339
2962.66	-0.004331	-0.004276	-0.004205	-0.004254	-0.003809	-0.003903	-0.003831	-0.003779	-0.004578	-0.004558	-0.004436	-0.004328
2964.59	-0.004983	-0.004995	-0.004823	-0.005003	-0.004527	-0.004642	-0.004518	-0.004517	-0.005313	-0.005219	-0.005232	-0.00507
2966.52	-0.005418	-0.005396	-0.005203	-0.005466	-0.005	-0.005086	-0.004937	-0.004935	-0.005683	-0.005629	-0.00569	-0.00557
2968.45	-0.005599	-0.005512	-0.005371	-0.005613	-0.005161	-0.005256	-0.005105	-0.005097	-0.005789	-0.005852	-0.005878	-0.005802
2970.38	-0.005447	-0.005409	-0.005305	-0.005438	-0.005109	-0.005203	-0.005052	-0.005046	-0.005708	-0.005824	-0.005811	-0.00573
2972.31	-0.005099	-0.005146	-0.005072	-0.005076	-0.004928	-0.004964	-0.004873	-0.004835	-0.005498	-0.005606	-0.005504	-0.005434
2974.23	-0.004761	-0.004829	-0.004781	-0.004739	-0.00469	-0.004695	-0.004635	-0.004583	-0.005281	-0.005321	-0.00521	-0.005087
2976.16	-0.004483	-0.004539	-0.004487	-0.004477	-0.004419	-0.004429	-0.004333	-0.004378	-0.005014	-0.004951	-0.004934	-0.004786
2978.09	-0.004254	-0.004262	-0.004213	-0.004232	-0.004161	-0.004135	-0.004048	-0.004166	-0.004701	-0.004584	-0.004581	-0.004484
2980.02	-0.003995	-0.003927	-0.003925	-0.003932	-0.003881	-0.003867	-0.00378	-0.003875	-0.004369	-0.004255	-0.004221	-0.00419
2981.95	-0.003662	-0.003609	-0.003626	-0.003612	-0.003525	-0.003579	-0.003534	-0.003537	-0.004025	-0.003889	-0.003908	-0.003883
2983.88	-0.003307	-0.003322	-0.003291	-0.003303	-0.003157	-0.003254	-0.003266	-0.003191	-0.003668	-0.003515	-0.003604	-0.00352
2985.81	-0.003005	-0.003002	-0.002971	-0.002959	-0.002821	-0.002877	-0.002911	-0.0028	-0.003286	-0.003172	-0.003249	-0.003188
2987.74	-0.002661	-0.002624	-0.002608	-0.002578	-0.002464	-0.00246	-0.002496	-0.002402	-0.002826	-0.002814	-0.002835	-0.002845
2989.66	-0.002204	-0.002187	-0.00219	-0.002148	-0.002039	-0.002055	-0.002062	-0.002028	-0.002298	-0.002396	-0.00237	-0.002407
2991.59	-0.001659	-0.001697	-0.001761	-0.001694	-0.001612	-0.001637	-0.001653	-0.001628	-0.001803	-0.001947	-0.001879	-0.001862
2993.52	-0.001117	-0.001228	-0.001291	-0.001235	-0.001162	-0.001173	-0.001217	-0.001202	-0.001285	-0.001451	-0.001362	-0.001269
2995.45	-0.000651	-0.000803	-0.000851	-0.00081	-0.000686	-0.000727	-0.000787	-0.000793	-0.000751	-0.000903	-0.000876	-0.000712
2997.38	-0.000293	-0.000384	-0.000435	-0.000444	-0.000268	-0.000344	-0.000337	-0.000389	-0.000318	-0.000388	-0.000441	-0.000279
2999.31	-2.3e-05	-3.7e-05	-6e-05	-0.00013	6.8e-05	-5e-06	7.1e-05	-1e-06	1.9e-05	-2.1e-05	-7.3e-05	-3.5e-05
3001.24	0.000224	0.000183	0.000199	0.000132	0.000347	0.000223	0.000296	0.000263	0.000253	0.000229	0.000183	0.000104
3003.17	0.000422	0.000318	0.000331	0.00029	0.000523	0.000337	0.000402	0.00043	0.00038	0.000394	0.000353	0.000244
3005.1	0.000517	0.000376	0.0004	0.000379	0.0006	0.000463	0.000452	0.000541	0.000501	0.000459	0.000457	0.000363
3007.02	0.000486	0.000382	0.000439	0.000418	0.000605	0.000561	0.000511	0.000561	0.000553	0.000463	0.000494	0.000476
3008.95	0.000416	0.000396	0.000393	0.000369	0.000548	0.000537	0.000553	0.000507	0.000491	0.000473	0.00045	0.000528
3010.88	0.000323	0.000375	0.000315	0.000266	0.000481	0.00046	0.000548	0.000431	0.000372	0.000442	0.000344	0.000445
3012.81	0.000242	0.000314	0.000237	0.000209	0.000422	0.000417	0.000484	0.000376	0.000258	0.000347	0.000267	0.000351
3014.74	0.000293	0.000295	0.000209	0.000268	0.000452	0.000439	0.000454	0.000403	0.000258	0.000385	0.000281	0.000352
3016.67	0.000408	0.000326	0.000267	0.000373	0.000584	0.000543	0.000535	0.000551	0.000375	0.000481	0.000387	0.000408
3018.6	0.000473	0.000403	0.000385	0.000505	0.000727	0.000701	0.000665	0.000759	0.000544	0.000499	0.00057	0.00052
3020.53	0.000523	0.000497	0.000504	0.000621	0.00083	0.000783	0.000772	0.000856	0.000661	0.000534	0.000705	0.000654
3022.45	0.000615	0.000601	0.000569	0.000704	0.000896	0.00083	0.000828	0.000904	0.000758	0.00065	0.000783	0.000734
3024.38	0.000634	0.000712	0.000677	0.000761	0.00094	0.000946	0.000881	0.000977	0.000878	0.000765	0.000841	0.000841
3026.31	0.000575	0.000783	0.00078	0.000731	0.000969	0.000996	0.000857	0.000952	0.0009	0.000831	0.000814	0.000905
3028.24	0.000563	0.000808	0.000803	0.000681	0.000999	0.000914	0.000809	0.00084	0.000835	0.000877	0.000733	0.000839
3030.17	0.000555	0.000755	0.000731	0.00065	0.000919	0.000816	0.000793	0.000766	0.000759	0.000849	0.000671	0.000759
3032.1	0.000637	0.000702	0.000677	0.000681	0.000808	0.000777	0.000821	0.000746	0.000731	0.00084	0.000669	0.000766
3034.03	0.000836	0.000696	0.000697	0.000781	0.000833	0.000836	0.000892	0.000785	0.000761	0.000898	0.000734	0.000802
3035.96	0.00094	0.000758	0.000726	0.000898	0.000906	0.00101	0.000982	0.000985	0.000862	0.000961	0.000929	0.000929
3037.89	0.000908	0.000894	0.000804	0.000938	0.000981	0.001157	0.001059	0.001118	0.001007	0.000984	0.001084	0.00108
3039.81	0.000905	0.001009	0.000889	0.000912	0.001046	0.001163	0.001048	0.001092	0.001092	0.001005	0.001115	0.001065
3041.74	0.000968	0.001067	0.000931	0.000964	0.001113	0.00113	0.001082	0.001089	0.001187	0.001072	0.00115	0.00111
3043.67	0.000984	0.001044	0.000961	0.001033	0.001179	0.001124	0.001144	0.001114	0.001267	0.001111	0.001117	0.001195
3045.6	0.001019	0.001024	0.001007	0.001082	0.001266	0.001128	0.001187	0.001126	0.001266	0.001134	0.001079	0.00117
3047.53	0.001113	0.001054	0.001036	0.001151	0.001364	0.001181	0.001242	0.001146	0.001241	0.001124	0.001138	0.00117
3049.46	0.001198	0.001126	0.001084	0.001247	0.001429	0.001255	0.001285	0.001219	0.001273	0.00117	0.001265	0.001205
3051.39	0.001322	0.001228	0.001191	0.001271	0.001461	0.001286	0.001334	0.001262	0.001359	0.001284	0.001304	0.001211
3053.32	0.001409	0.001303	0.001259	0.001223	0.00143	0.001307	0.001324	0.00131	0.001436	0.001383	0.00126	0.001241
3055.24	0.001367	0.001323	0.001246	0.001151	0.001358	0.001287	0.001234	0.00135	0.001463	0.00139	0.001192	0.001263
3057.17	0.001249	0.001257	0.001181	0.001063	0.001272	0.001219	0.001151	0.001278	0.001388	0.001294	0.00114	0.001201
3059.1	0.00107	0.0011	0.001055	0.000972	0.001171	0.001144	0.001091	0.001111	0.001199	0.001156	0.001105	0.001125
3061.03	0.000845	0.000852	0.000882	0.000886	0.001091	0.001009	0.000968	0.000866	0.000954	0.000952	0.000998	0.001016
3062.96	0.000638	0.000598	0.000689	0.000761	0.000992	0.000772	0.000766	0.000673	0.000713	0.000714	0.00082	0.000771
3064.89	0.000516	0.000492	0.000535	0.000588	0.000777	0.000578	0.000589	0.000585	0.000532	0.0005	0.000572	0.000552
3066.82	0.00053	0.000537	0.000492	0.000517	0.000545	0.000522	0.000486	0.000594	0.000482	0.000439	0.00043	0.000455
3068.75	0.000666	0.000648	0.000534	0.00055	0.000484	0.000551	0.000481	0.000666	0.000539	0.000513	0.000452	0.000409
3070.68	0.000764	0.00073	0.00057	0.000586	0.000577	0.000648	0.000566	0.000711	0.00058	0.000612	0.00056	0.000495
3072.6	0.000674	0.000689	0.00059	0.000579	0.000672	0.000693	0.000623	0.000668	0.000543	0.000648	0.000625	0.000594
3074.53	0.000508	0.000531	0.000561	0.000548	0.000707	0.000562	0.000578	0.00054	0.000471	0.000579	0.000585	0.000537
3076.46	0.000366	0.000366	0.000432	0.00047	0.000581	0.000378	0.00048	0.000405	0.000365	0.000477	0.000481	0.000454
3078.39	0.000257	0.000273	0.000325	0.000388	0.000338	0.000284	0.000373	0.000255	0.000281	0.000377	0.00032	0.000417
3080.32	0.000234	0.000241	0.000237	0.000361	0.000165	0.000246	0.000283	0.000133	0.00031	0.0003	0.000199	0.000321
3082.25	0.000259	0.000282	0.000157	0.000305	0.000135	0.000264	0.000194	0.000136	0.000374	0.000224	0.000138	0.000208
3084.18	0.000256	0.000313	0.000131	0.000254	0.000132	0.000297	0.000105	0.000187	0.000396	0.000215	0.000118	0.000181
3086.11	0.000238	0.000256	0.000142	0.000215	0.000157	0.000249	7.7e-05	0.000226	0.000367	0.000226	0.000118	0.000201
3088.03	0.000269	0.000208	0.000206	0.00017	0.000311	0.000232	0.000175	0.000312	0.000326	0.000206	0.000178	0.000287
3089.96	0.000266	0.000192	0.000293	0.000157	0.000406	0.000256	0.00025	0.000345	0.000201	0.00019	0.00024	0.000355
3091.89	0.000281	0.000186	0.000359	0.000208	0.000415	0.000223	0.000239	0.000326	8e-05	0.000165	0.000264	0.000306
3093.82	0.000306	0.000198	0.000364	0.00027	0.000422	0.000214	0.000254	0.000319	0.000116	0.000199	0.000303	0.000225
3095.75	0.000242	0.00023	0.000285	0.000226	0.000381	0.000177	0.000228	0.000181	0.00015	0.000175	0.000273	0.000136
3097.68	0.00014	0.000261	0.000142	0.000137	0.000253	0.000123	0.000155	3e-06	0.000167	0.000148	0.000202	6.6e-05
3099.61	0.000136	0.000284	4.7e-05	0.000134	0.00016	0.000174	0.00019	2.8e-05	0.000229	0.000162	0.000207	0.000125
3101.54	0.000243	0.00033	9.7e-05	0.000204	0.000139	0.000311	0.000278	0.000178	0.00028	0.000184	0.000283	0.000233
3103.46	0.000334	0.00035	0.000182	0.000315	9.5e-05	0.000355	0.000211	0.00025	0.000293	0.000263	0.000319	0.000264
3105.39	0.000445	0.000334	0.000278	0.000428	0.000169	0.000367	0.000146	0.000314	0.000345	0.000402	0.000346	0.000326
3107.32	0.000508	0.000366	0.000438	0.000493	0.00042	0.000487	0.00028	0.000375	0.000448	0.000544	0.000391	0.000405
3109.25	0.000493	0.000448	0.000562	0.000524	0.000608	0.0005	0.000463	0.000373	0.000517	0.000587	0.000425	0.000474
3111.18	0.000495	0.000517	0.00059	0.000545	0.000685	0.000459	0.000582	0.000451	0.000589	0.000607	0.000481	0.000558
3113.11	0.000528	0.000545	0.000593	0.000558	0.000673	0.000434	0.00064	0.000527	0.000614	0.00055	0.000551	0.000583
3115.04	0.000535	0.000579	0.0006	0.000522	0.000559	0.000433	0.000647	0.000509	0.000599	0.000509	0.000599	0.000583
3116.97	0.000508	0.000591	0.000584	0.000494	0.000485	0.000474	0.000569	0.000494	0.000631	0.000541	0.000574	0.000574
3118.9	0.000638	0.000595	0.000593	0.000573	0.000514	0.000534	0.000496	0.000579	0.000679	0.000576	0.000531	0.000554
3120.82	0.000837	0.000681	0.000642	0.000709	0.000663	0.000606	0.000521	0.000701	0.000745	0.000644	0.000563	0.000549
3122.75	0.000902	0.000794	0.000645	0.000762	0.000723	0.000595	0.000514	0.000704	0.000771	0.000666	0.000602	0.000559
3124.68	0.000917	0.000918	0.000683	0.000785	0.000766	0.000665	0.000562	0.000711	0.000797	0.000753	0.000708	0.000632
3126.61	0.000895	0.001032	0.00084	0.000886	0.000894	0.000828	0.000712	0.00076	0.000871	0.000944	0.00089	0.000813
3128.54	0.000882	0.001112	0.000973	0.000963	0.001041	0.000971	0.000868	0.000816	0.000951	0.001085	0.00101	0.001038
3130.47	0.00096	0.001101	0.001	0.001005	0.001192	0.001051	0.000973	0.000884	0.001043	0.001123	0.00106	0.001144
3132.4	0.001084	0.000997	0.000977	0.001039	0.001199	0.001072	0.001002	0.000955	0.001131	0.00107	0.001057	0.001131
3134.33	0.001103	0.000908	0.000908	0.001016	0.001062	0.001073	0.000947	0.000969	0.001131	0.001005	0.001039	0.001046
3136.25	0.001057	0.000896	0.000867	0.000963	0.000889	0.001047	0.000904	0.000914	0.001118	0.000948	0.000982	0.000915
3138.18	0.001096	0.000971	0.000948	0.00103	0.000934	0.001036	0.000983	0.000947	0.001151	0.000981	0.000978	0.000888
3140.11	0.001125	0.00103	0.00104	0.001136	0.001167	0.001012	0.001065	0.001005	0.001177	0.001068	0.001047	0.001023
3142.04	0.001168	0.001131	0.00113	0.001159	0.00134	0.000998	0.001124	0.00107	0.001199	0.001159	0.001129	0.001244
3143.97	0.001269	0.001247	0.001214	0.001189	0.001419	0.001124	0.00117	0.001145	0.001264	0.001298	0.001213	0.001405
3145.9	0.001335	0.001268	0.00119	0.001187	0.001367	0.001269	0.001152	0.001192	0.001373	0.00134	0.001238	0.001413
3147.83	0.001391	0.001299	0.001143	0.001189	0.001313	0.001368	0.001168	0.001225	0.001434	0.001342	0.001352	0.00133
3149.76	0.001451	0.00136	0.001194	0.001241	0.001406	0.001481	0.001229	0.001255	0.001522	0.00141	0.001431	0.001257
3151.69	0.001495	0.001369	0.001302	0.001331	0.001515	0.001496	0.001288	0.001336	0.001576	0.001492	0.001423	0.001285
3153.61	0.001477	0.001352	0.001408	0.001423	0.001581	0.001429	0.001355	0.001397	0.001609	0.00152	0.001444	0.001374
3155.54	0.001425	0.001414	0.001488	0.001464	0.00156	0.001357	0.001383	0.001369	0.001581	0.00145	0.001423	0.001394
3157.47	0.001408	0.001438	0.001463	0.001422	0.001441	0.001339	0.001372	0.001304	0.001478	0.001356	0.001367	0.001296
3159.4	0.001391	0.001385	0.001338	0.001308	0.001368	0.001335	0.001365	0.001294	0.001409	0.001371	0.001355	0.001266
3161.33	0.001399	0.001393	0.001275	0.001253	0.001435	0.001409	0.00135	0.001313	0.001337	0.001451	0.001481	0.001345
3163.26	0.001471	0.001433	0.001318	0.001271	0.001547	0.001484	0.0013	0.00131	0.001406	0.001557	0.001504	0.001423
3165.19	0.00156	0.001442	0.001359	0.00133	0.001585	0.001446	0.001308	0.001335	0.001564	0.00158	0.001412	0.001489
3167.12	0.001589	0.001488	0.001411	0.001459	0.001577	0.001456	0.001412	0.001333	0.001671	0.00151	0.001364	0.001495
3169.04	0.001608	0.001583	0.001508	0.001592	0.001566	0.001455	0.001495	0.001345	0.001704	0.001521	0.001334	0.001514
3170.97	0.001634	0.001613	0.00157	0.00168	0.001705	0.001451	0.001579	0.001477	0.001676	0.001679	0.001395	0.001546
3172.9	0.001552	0.001573	0.001561	0.001681	0.001905	0.001488	0.001584	0.001576	0.001601	0.001771	0.001517	0.001551
3174.83	0.001447	0.001523	0.001507	0.001582	0.001829	0.001475	0.001441	0.00151	0.00151	0.00162	0.001559	0.001449
3176.76	0.00145	0.00148	0.001448	0.001414	0.001554	0.001432	0.001307	0.001383	0.001508	0.001429	0.001494	0.001373
3178.69	0.001457	0.00146	0.001356	0.001306	0.001365	0.001435	0.00126	0.00128	0.001543	0.001307	0.001435	0.001414
3180.62	0.001431	0.001474	0.001303	0.001307	0.001297	0.001394	0.001271	0.001204	0.001531	0.001183	0.001377	0.00137
3182.55	0.001461	0.001478	0.00128	0.001341	0.001316	0.001313	0.00131	0.001211	0.001568	0.001262	0.001336	0.001323
3184.48	0.001515	0.00144	0.001291	0.001398	0.001431	0.001429	0.001367	0.001286	0.001589	0.001565	0.001426	0.00131
3186.4	0.001563	0.001433	0.00139	0.001464	0.001504	0.001577	0.001307	0.001311	0.001589	0.001677	0.001532	0.001353
3188.33	0.001611	0.001482	0.001487	0.001514	0.001528	0.001584	0.001229	0.001337	0.001656	0.001657	0.001535	0.001488
3190.26	0.00168	0.001564	0.001594	0.001541	0.001632	0.001617	0.001313	0.001453	0.001717	0.001661	0.001489	0.001715
3192.19	0.001669	0.001592	0.001615	0.001497	0.001683	0.001567	0.001339	0.001469	0.001633	0.0015	0.001372	0.001686
3194.12	0.001516	0.001484	0.00149	0.001359	0.00149	0.001364	0.001271	0.00134	0.001468	0.001264	0.001255	0.001345
3196.05	0.001372	0.001315	0.001308	0.001211	0.001243	0.001232	0.001247	0.001163	0.001344	0.001241	0.001232	0.001109
3197.98	0.001278	0.001213	0.001155	0.00114	0.00119	0.001137	0.001209	0.001059	0.001242	0.001309	0.001262	0.001074
3199.91	0.001246	0.001163	0.00106	0.001186	0.001247	0.00097	0.001117	0.001082	0.001176	0.00131	0.001247	0.001123
3201.83	0.001306	0.001191	0.001075	0.001286	0.00133	0.000957	0.001096	0.001213	0.001236	0.001402	0.001228	0.001192
3203.76	0.001397	0.001276	0.001177	0.001333	0.001403	0.001107	0.001124	0.001285	0.001284	0.00142	0.001258	0.001217
3205.69	0.001482	0.001331	0.001263	0.001319	0.00136	0.001263	0.001102	0.001179	0.001244	0.001309	0.001284	0.001096
3207.62	0.001472	0.001397	0.001361	0.001334	0.001308	0.001316	0.001164	0.001101	0.001298	0.001299	0.001381	0.001149
3209.55	0.001352	0.001426	0.001373	0.001309	0.00126	0.001242	0.001216	0.000956	0.001277	0.001289	0.001357	0.001331
3211.48	0.001254	0.00141	0.001344	0.001293	0.001237	0.001163	0.001165	0.000888	0.00127	0.001336	0.001219	0.001457
3213.41	0.00121	0.001317	0.001326	0.001263	0.001265	0.00114	0.001073	0.000955	0.001297	0.001327	0.001134	0.001432
3215.34	0.001207	0.001174	0.001254	0.001169	0.001256	0.001128	0.000982	0.001014	0.001327	0.001176	0.001075	0.001216
3217.27	0.00126	0.00109	0.001141	0.001094	0.001175	0.001029	0.000899	0.001067	0.001236	0.001036	0.001017	0.000915
3219.19	0.00136	0.001142	0.00114	0.001128	0.001089	0.000954	0.000817	0.001082	0.001161	0.001	0.001061	0.000716
3221.12	0.001401	0.001239	0.001197	0.001223	0.001127	0.000928	0.000843	0.001044	0.001279	0.001046	0.001204	0.000787
3223.05	0.001371	0.001328	0.001217	0.001288	0.001181	0.000988	0.00094	0.000906	0.001352	0.001088	0.0012	0.00099
3224.98	0.001353	0.001507	0.00135	0.00142	0.00124	0.00118	0.001116	0.000995	0.001399	0.001254	0.001149	0.001302
3226.91	0.00127	0.001538	0.001402	0.001432	0.001225	0.001288	0.001246	0.001153	0.001372	0.001375	0.001156	0.001512
3228.84	0.00127	0.001441	0.001353	0.001352	0.001187	0.001304	0.001273	0.00121	0.001373	0.001461	0.001303	0.001542
3230.77	0.001451	0.00143	0.001367	0.001331	0.001301	0.00132	0.00126	0.00125	0.001357	0.00155	0.001479	0.001476
3232.7	0.001615	0.001452	0.001429	0.001317	0.001505	0.001402	0.001245	0.001253	0.00144	0.001562	0.001515	0.001368
3234.62	0.001702	0.001484	0.001432	0.001302	0.001652	0.001496	0.001321	0.001243	0.001587	0.001529	0.001468	0.0013
3236.55	0.001715	0.001636	0.001496	0.0014	0.001701	0.001504	0.00143	0.001318	0.001632	0.00153	0.001465	0.001311
3238.48	0.001647	0.001851	0.001697	0.001602	0.001699	0.001555	0.001509	0.001569	0.001742	0.001714	0.001584	0.001443
3240.41	0.001606	0.00187	0.001787	0.001733	0.001618	0.001554	0.001457	0.001611	0.001925	0.001866	0.001638	0.001606
3242.34	0.001768	0.001861	0.00179	0.001918	0.001651	0.001567	0.0015	0.001532	0.002039	0.001948	0.001738	0.001799
3244.27	0.002049	0.001918	0.001816	0.002131	0.001758	0.001758	0.00165	0.001594	0.002008	0.001996	0.001804	0.001944
3246.2	0.002318	0.002034	0.001977	0.002294	0.001921	0.002099	0.001881	0.001843	0.002136	0.002102	0.002037	0.002091
3248.13	0.002529	0.002192	0.002238	0.002339	0.00225	0.002309	0.002113	0.002045	0.002336	0.002189	0.002409	0.002207
3250.05	0.002594	0.002358	0.002493	0.002288	0.002617	0.002351	0.002186	0.002174	0.002455	0.002264	0.002534	0.002263
3251.98	0.002487	0.002452	0.002575	0.002204	0.002757	0.002337	0.002104	0.002156	0.002531	0.002388	0.002364	0.002287
3253.91	0.002406	0.00237	0.002421	0.002102	0.002585	0.002196	0.00195	0.001893	0.002482	0.002414	0.001996	0.002188
3255.84	0.002461	0.002341	0.002222	0.002067	0.002328	0.002128	0.002014	0.001898	0.002336	0.00241	0.001988	0.002134
3257.77	0.002501	0.002366	0.002089	0.002096	0.002086	0.002206	0.002148	0.002095	0.002225	0.002377	0.002233	0.00214
3259.7	0.002522	0.002423	0.002099	0.002252	0.002037	0.002252	0.002256	0.002209	0.002283	0.002416	0.002467	0.002197
3261.63	0.002483	0.002429	0.002212	0.002339	0.002164	0.002156	0.00223	0.002188	0.002311	0.002305	0.002532	0.002215
3263.56	0.002339	0.002376	0.002308	0.002427	0.002256	0.002039	0.002067	0.002105	0.00238	0.002209	0.00241	0.002228
3265.49	0.002242	0.002306	0.002339	0.002546	0.002278	0.001991	0.001942	0.002039	0.00252	0.002283	0.002295	0.00229
3267.41	0.002086	0.002149	0.002273	0.002361	0.002169	0.001957	0.001787	0.001973	0.002457	0.002199	0.00217	0.002246
3269.34	0.001814	0.001905	0.002046	0.001936	0.001884	0.001872	0.001729	0.001838	0.002126	0.001993	0.002024	0.002036
3271.27	0.001599	0.001663	0.001711	0.001561	0.001508	0.001737	0.001618	0.001479	0.001673	0.001792	0.001712	0.001646
3273.2	0.001495	0.001435	0.00138	0.00121	0.001206	0.001477	0.001307	0.001087	0.001298	0.001464	0.001332	0.001227
3275.13	0.001345	0.001153	0.001096	0.000968	0.001068	0.001146	0.000974	0.000875	0.001117	0.001078	0.000997	0.000945
3277.06	0.001093	0.001008	0.000857	0.000946	0.000936	0.0008	0.000702	0.000745	0.001076	0.000869	0.0007	0.000766
3278.99	0.000765	0.000819	0.000658	0.000846	0.00071	0.000495	0.000459	0.000608	0.000866	0.000622	0.000543	0.000717
3280.92	0.000393	0.000543	0.000477	0.000597	0.000478	0.000299	0.000284	0.000459	0.000535	0.00042	0.000509	0.000729
3282.84	0.000201	0.000372	0.0003	0.000345	0.000154	0.000192	0.000217	0.000251	0.000224	0.00041	0.000472	0.000521
3284.77	0.000208	0.000303	0.000131	0.000191	-7e-05	0.000199	8.6e-05	3.3e-05	-0.000114	0.0004	0.000441	0.000228
3286.7	4.4e-05	0.000159	-5.7e-05	-3.9e-05	-0.000135	6.3e-05	-0.000141	-0.000175	-0.000318	0.00018	0.00029	-1e-06
3288.63	-0.000314	-5e-05	-0.0002	-0.000219	-0.000397	-0.000241	-0.000334	-0.000396	-0.0004	-0.000102	-9.9e-05	-0.000213
3290.56	-0.000527	-0.00031	-0.000324	-0.000302	-0.000711	-0.000604	-0.000477	-0.000598	-0.000523	-0.000413	-0.000502	-0.000447
3292.49	-0.000679	-0.000767	-0.000536	-0.000466	-0.00089	-0.000974	-0.000718	-0.000749	-0.000717	-0.00075	-0.000828	-0.000565
3294.42	-0.000742	-0.001052	-0.000769	-0.000672	-0.000997	-0.00119	-0.000961	-0.000803	-0.000849	-0.000901	-0.001085	-0.000716
3296.35	-0.000769	-0.001137	-0.000951	-0.000892	-0.001129	-0.001223	-0.001045	-0.00088	-0.001051	-0.000995	-0.001185	-0.001062
3298.28	-0.001008	-0.001152	-0.001057	-0.00102	-0.001226	-0.001167	-0.001071	-0.00104	-0.001262	-0.001106	-0.001097	-0.001281
3300.2	-0.001327	-0.00114	-0.001147	-0.001078	-0.001366	-0.001173	-0.001133	-0.001219	-0.001216	-0.001258	-0.000988	-0.001326
3302.13	-0.001408	-0.001141	-0.001173	-0.001052	-0.001543	-0.001162	-0.001169	-0.001353	-0.001085	-0.001374	-0.000931	-0.001281
3304.06	-0.001332	-0.00122	-0.001193	-0.001077	-0.001508	-0.001217	-0.001293	-0.001441	-0.00112	-0.001436	-0.000981	-0.001278
3305.99	-0.001272	-0.001329	-0.001257	-0.001243	-0.001438	-0.001325	-0.001513	-0.001344	-0.001347	-0.001457	-0.001142	-0.001245
3307.92	-0.00125	-0.001382	-0.00135	-0.001482	-0.00143	-0.001494	-0.001657	-0.001247	-0.001603	-0.001447	-0.001432	-0.001288
3309.85	-0.001387	-0.001408	-0.001491	-0.001627	-0.001364	-0.001768	-0.001665	-0.00136	-0.001748	-0.001417	-0.001691	-0.001395
3311.78	-0.001593	-0.00141	-0.001546	-0.001647	-0.001516	-0.001932	-0.001635	-0.001568	-0.001731	-0.00141	-0.001696	-0.001486
3313.71	-0.001669	-0.001519	-0.00155	-0.001625	-0.001811	-0.001893	-0.001592	-0.001743	-0.001729	-0.00158	-0.001636	-0.001602
3315.63	-0.001702	-0.001642	-0.001517	-0.001632	-0.002001	-0.001717	-0.001584	-0.001798	-0.001893	-0.001833	-0.001615	-0.001743
3317.56	-0.001772	-0.00174	-0.001503	-0.001656	-0.00206	-0.001544	-0.001676	-0.001717	-0.001975	-0.001956	-0.001618	-0.001869
3319.49	-0.001689	-0.001757	-0.00151	-0.001558	-0.001875	-0.001367	-0.001765	-0.001495	-0.001881	-0.001916	-0.001677	-0.001718
3321.42	-0.001658	-0.001668	-0.001544	-0.001448	-0.001652	-0.001519	-0.001857	-0.001513	-0.001702	-0.001813	-0.001776	-0.001601
3323.35	-0.001741	-0.001526	-0.001544	-0.001324	-0.001571	-0.001839	-0.001804	-0.001729	-0.001498	-0.0016	-0.001745	-0.001575
3325.28	-0.001731	-0.001483	-0.001476	-0.001291	-0.001703	-0.001868	-0.001619	-0.001745	-0.001417	-0.001453	-0.001658	-0.001517
3327.21	-0.001638	-0.001497	-0.001451	-0.00131	-0.001814	-0.001788	-0.001506	-0.001577	-0.001426	-0.001516	-0.001631	-0.001493
3329.14	-0.00152	-0.001396	-0.001422	-0.001271	-0.001677	-0.001603	-0.00142	-0.001418	-0.001381	-0.001501	-0.001509	-0.001435
3331.07	-0.001508	-0.001385	-0.001531	-0.001411	-0.001573	-0.001404	-0.001401	-0.001401	-0.001386	-0.001528	-0.001425	-0.001393
3332.99	-0.001597	-0.001529	-0.001705	-0.001615	-0.001589	-0.001387	-0.001483	-0.001513	-0.001577	-0.001743	-0.001516	-0.001412
3334.92	-0.00179	-0.001681	-0.001839	-0.001695	-0.001732	-0.001575	-0.001595	-0.001666	-0.001755	-0.001842	-0.001635	-0.001574
3336.85	-0.001864	-0.001782	-0.001834	-0.001793	-0.001876	-0.001731	-0.001742	-0.001822	-0.001852	-0.001873	-0.001733	-0.001729
3338.78	-0.001669	-0.001807	-0.001628	-0.001809	-0.001864	-0.001721	-0.001817	-0.001783	-0.001788	-0.001855	-0.001765	-0.001776
3340.71	-0.001448	-0.001622	-0.001455	-0.001589	-0.001697	-0.001711	-0.001773	-0.001633	-0.001602	-0.001686	-0.001683	-0.001718
3342.64	-0.001337	-0.001417	-0.001422	-0.001341	-0.00139	-0.001609	-0.001629	-0.001537	-0.001543	-0.001495	-0.001569	-0.001587
3344.57	-0.001384	-0.001389	-0.001522	-0.001304	-0.001346	-0.001488	-0.001561	-0.001418	-0.0016	-0.001387	-0.001495	-0.001555
3346.5	-0.001443	-0.001391	-0.00151	-0.001278	-0.00147	-0.001471	-0.001538	-0.001334	-0.001622	-0.001302	-0.001482	-0.001596
3348.42	-0.001421	-0.00132	-0.00139	-0.001292	-0.001438	-0.001427	-0.001402	-0.001312	-0.001518	-0.001218	-0.001486	-0.001485
3350.35	-0.001452	-0.00135	-0.001273	-0.001555	-0.0014	-0.001455	-0.001297	-0.001539	-0.001478	-0.001426	-0.001509	-0.00145
3352.28	-0.00152	-0.001493	-0.001266	-0.001721	-0.001447	-0.001588	-0.001297	-0.001741	-0.001514	-0.00178	-0.001651	-0.001578
3354.21	-0.001587	-0.001594	-0.001458	-0.001689	-0.001529	-0.001722	-0.00145	-0.001776	-0.001613	-0.001926	-0.001798	-0.001608
3356.14	-0.00167	-0.001722	-0.001633	-0.001687	-0.00162	-0.00182	-0.001712	-0.001816	-0.001856	-0.001915	-0.001869	-0.001766
3358.07	-0.001745	-0.001731	-0.001653	-0.001692	-0.001761	-0.001795	-0.001978	-0.001721	-0.002072	-0.001807	-0.001848	-0.001964
3360	-0.001773	-0.001652	-0.001535	-0.001647	-0.001769	-0.001764	-0.002026	-0.001664	-0.002128	-0.001723	-0.001741	-0.001972
3361.93	-0.001777	-0.00161	-0.001482	-0.001618	-0.001642	-0.001759	-0.001838	-0.001761	-0.001937	-0.001727	-0.001679	-0.001837
3363.86	-0.001772	-0.001628	-0.001542	-0.001616	-0.001674	-0.001785	-0.001761	-0.001937	-0.001739	-0.0018	-0.001737	-0.001761
3365.78	-0.001662	-0.001618	-0.001607	-0.001563	-0.001766	-0.001745	-0.001713	-0.001891	-0.001591	-0.001819	-0.00178	-0.001666
3367.71	-0.001544	-0.001555	-0.001638	-0.001503	-0.001736	-0.00163	-0.001577	-0.001629	-0.001435	-0.001666	-0.001729	-0.001537
3369.64	-0.001471	-0.001507	-0.001657	-0.00145	-0.001661	-0.00156	-0.00146	-0.001385	-0.001527	-0.001629	-0.00171	-0.001587
3371.57	-0.001409	-0.001455	-0.001632	-0.001408	-0.001641	-0.001436	-0.001411	-0.001185	-0.001723	-0.001737	-0.001666	-0.001602
3373.5	-0.001413	-0.001499	-0.001566	-0.00146	-0.001666	-0.001499	-0.001465	-0.001285	-0.001849	-0.001743	-0.001646	-0.001636
3375.43	-0.001427	-0.001579	-0.001643	-0.001527	-0.001677	-0.001654	-0.001559	-0.001581	-0.001876	-0.001717	-0.001699	-0.001743
3377.36	-0.001411	-0.001588	-0.001635	-0.001524	-0.001611	-0.00165	-0.001616	-0.001699	-0.001759	-0.001682	-0.00161	-0.001695
3379.29	-0.001456	-0.001535	-0.001509	-0.001504	-0.001481	-0.001619	-0.001575	-0.001661	-0.001592	-0.0017	-0.001499	-0.001658
3381.21	-0.001483	-0.001484	-0.001387	-0.001484	-0.001416	-0.00159	-0.00154	-0.00166	-0.001465	-0.001751	-0.001557	-0.001734
3383.14	-0.001452	-0.001444	-0.001325	-0.001444	-0.001431	-0.001562	-0.00155	-0.001642	-0.00144	-0.001733	-0.001692	-0.001772
3385.07	-0.001323	-0.001286	-0.001197	-0.001337	-0.001311	-0.001372	-0.001395	-0.00141	-0.001368	-0.001458	-0.001637	-0.001583
3387	-0.001278	-0.001232	-0.001156	-0.001309	-0.001174	-0.001351	-0.001306	-0.001286	-0.00143	-0.001221	-0.001558	-0.001429
3388.93	-0.001371	-0.001343	-0.001334	-0.001293	-0.001133	-0.001431	-0.001243	-0.00132	-0.001555	-0.001284	-0.001453	-0.001362
3390.86	-0.00142	-0.00142	-0.001378	-0.001272	-0.001141	-0.001421	-0.001224	-0.00129	-0.001523	-0.001413	-0.001318	-0.001334
3392.79	-0.001523	-0.001538	-0.001447	-0.001403	-0.001497	-0.001546	-0.001492	-0.001414	-0.001686	-0.001672	-0.001536	-0.00162
3394.72	-0.001526	-0.001593	-0.001534	-0.001553	-0.001845	-0.001562	-0.001783	-0.001637	-0.001791	-0.001776	-0.001726	-0.00189
3396.64	-0.001418	-0.001553	-0.001526	-0.001584	-0.001859	-0.001505	-0.001884	-0.001624	-0.001725	-0.00161	-0.001701	-0.001888
3398.57	-0.001378	-0.001447	-0.001461	-0.001519	-0.001698	-0.001437	-0.00175	-0.001498	-0.001704	-0.001496	-0.001632	-0.001705
3400.5	-0.001536	-0.001471	-0.001465	-0.001549	-0.001628	-0.001564	-0.001644	-0.001626	-0.00176	-0.001599	-0.001665	-0.001586
3402.43	-0.001663	-0.001498	-0.001489	-0.001533	-0.00157	-0.001656	-0.001427	-0.001686	-0.001717	-0.001659	-0.001619	-0.001576
3404.36	-0.001597	-0.001458	-0.001477	-0.001537	-0.001504	-0.001589	-0.001267	-0.001599	-0.001634	-0.001658	-0.001649	-0.001693
3406.29	-0.001556	-0.001471	-0.001503	-0.001596	-0.00162	-0.001552	-0.00136	-0.001614	-0.001667	-0.001731	-0.001805	-0.001794
3408.22	-0.001498	-0.001449	-0.001529	-0.001596	-0.001593	-0.001484	-0.001487	-0.001636	-0.001622	-0.001722	-0.001689	-0.001706
3410.15	-0.001531	-0.001529	-0.001621	-0.001594	-0.00157	-0.001522	-0.001681	-0.001631	-0.001622	-0.001801	-0.001674	-0.001643
3412.08	-0.001587	-0.001556	-0.001634	-0.001517	-0.001558	-0.001513	-0.001704	-0.001611	-0.001619	-0.001838	-0.001669	-0.001532
3414	-0.001576	-0.001495	-0.001479	-0.001435	-0.001423	-0.001436	-0.001505	-0.001618	-0.001568	-0.001626	-0.001486	-0.001356
3415.93	-0.001719	-0.001631	-0.001456	-0.001587	-0.001397	-0.001501	-0.001468	-0.001789	-0.001646	-0.001636	-0.001583	-0.001537
3417.86	-0.001888	-0.001839	-0.0016	-0.001884	-0.001611	-0.001734	-0.001721	-0.002044	-0.00178	-0.001932	-0.001929	-0.001879
3419.79	-0.001958	-0.001939	-0.001788	-0.002027	-0.001908	-0.001963	-0.002005	-0.002088	-0.001939	-0.002136	-0.002128	-0.002028
3421.72	-0.001943	-0.001962	-0.002004	-0.002009	-0.002084	-0.002025	-0.002103	-0.001946	-0.002082	-0.002158	-0.002212	-0.002082
3423.65	-0.001807	-0.001867	-0.002076	-0.001868	-0.002094	-0.001891	-0.002011	-0.001777	-0.002035	-0.002009	-0.002192	-0.001981
3425.58	-0.001567	-0.001703	-0.001888	-0.001639	-0.0019	-0.001692	-0.001786	-0.001538	-0.001904	-0.001755	-0.0019	-0.001746
3427.51	-0.001557	-0.00168	-0.00169	-0.001597	-0.001799	-0.001684	-0.001708	-0.001512	-0.001939	-0.001665	-0.001723	-0.001769
3429.43	-0.001763	-0.001806	-0.001708	-0.001755	-0.00188	-0.001874	-0.00183	-0.001715	-0.002027	-0.001808	-0.00182	-0.002067
3431.36	-0.00188	-0.00188	-0.001748	-0.001862	-0.001946	-0.002037	-0.001868	-0.001856	-0.002052	-0.001967	-0.001887	-0.002162
3433.29	-0.001866	-0.001909	-0.001743	-0.001914	-0.001937	-0.002009	-0.001866	-0.001877	-0.002023	-0.001985	-0.001909	-0.002055
3435.22	-0.001817	-0.001879	-0.001687	-0.001915	-0.001753	-0.001826	-0.001734	-0.001771	-0.001871	-0.001902	-0.001828	-0.001869
3437.15	-0.001911	-0.001925	-0.001728	-0.001981	-0.001679	-0.001808	-0.00174	-0.001776	-0.001868	-0.001952	-0.001845	-0.001776
3439.08	-0.001901	-0.001889	-0.001663	-0.001873	-0.001614	-0.001717	-0.001676	-0.001664	-0.001899	-0.001821	-0.001856	-0.001683
3441.01	-0.001954	-0.001802	-0.001544	-0.001766	-0.001507	-0.001678	-0.001535	-0.001709	-0.001907	-0.001724	-0.00188	-0.001739
3442.94	-0.002142	-0.001935	-0.001804	-0.001902	-0.001736	-0.001973	-0.001831	-0.002132	-0.002139	-0.002019	-0.002187	-0.002098
3444.87	-0.002137	-0.002059	-0.002104	-0.002033	-0.002115	-0.002224	-0.002232	-0.00243	-0.00233	-0.002339	-0.002464	-0.002347
3446.79	-0.002039	-0.00207	-0.002273	-0.002122	-0.002407	-0.002276	-0.002468	-0.00242	-0.00236	-0.00242	-0.002426	-0.002443
3448.72	-0.002031	-0.002019	-0.002309	-0.002071	-0.002434	-0.002162	-0.002321	-0.002171	-0.002302	-0.002277	-0.002163	-0.002366
3450.65	-0.00202	-0.002006	-0.002236	-0.002046	-0.002383	-0.001992	-0.002103	-0.00198	-0.002222	-0.002169	-0.002049	-0.002188
3452.58	-0.001821	-0.001904	-0.001959	-0.001924	-0.002048	-0.001717	-0.001767	-0.001781	-0.001971	-0.001969	-0.001873	-0.001889
3454.51	-0.001857	-0.001895	-0.001776	-0.001917	-0.00167	-0.001701	-0.001567	-0.001793	-0.001922	-0.001998	-0.001783	-0.001827
3456.44	-0.002073	-0.002042	-0.001878	-0.002092	-0.001731	-0.001913	-0.00183	-0.001991	-0.002153	-0.002187	-0.001973	-0.002077
3458.37	-0.002098	-0.002085	-0.001905	-0.00209	-0.001918	-0.001995	-0.002017	-0.002077	-0.002174	-0.002119	-0.002103	-0.002193
3460.3	-0.002126	-0.002096	-0.001924	-0.002075	-0.002072	-0.002063	-0.002071	-0.002115	-0.002149	-0.002082	-0.002239	-0.00225
3462.22	-0.002121	-0.002075	-0.001986	-0.002109	-0.002202	-0.002132	-0.002096	-0.002081	-0.0022	-0.002144	-0.002443	-0.002264
3464.15	-0.001993	-0.002058	-0.002089	-0.002148	-0.002325	-0.002138	-0.002166	-0.002006	-0.00222	-0.002215	-0.002575	-0.002178
3466.08	-0.001927	-0.002035	-0.002148	-0.002087	-0.002249	-0.002129	-0.00216	-0.001951	-0.002221	-0.002149	-0.002431	-0.002014
3468.01	-0.001967	-0.00196	-0.002058	-0.001951	-0.00203	-0.002043	-0.001975	-0.001919	-0.002229	-0.002022	-0.002014	-0.001924
3469.94	-0.002109	-0.002029	-0.002056	-0.002001	-0.002039	-0.002077	-0.002063	-0.002098	-0.002322	-0.00215	-0.001856	-0.002098
3471.87	-0.002191	-0.002105	-0.002103	-0.002047	-0.002139	-0.002137	-0.002157	-0.002247	-0.002299	-0.002274	-0.001983	-0.002215
3473.8	-0.002119	-0.00198	-0.001894	-0.001953	-0.001992	-0.00196	-0.00187	-0.002049	-0.002008	-0.002124	-0.001959	-0.002042
3475.73	-0.002099	-0.001928	-0.001674	-0.001928	-0.001793	-0.001851	-0.001689	-0.001919	-0.001809	-0.001925	-0.001977	-0.001887
3477.66	-0.002198	-0.002108	-0.00177	-0.002033	-0.001843	-0.002	-0.00187	-0.00196	-0.001929	-0.001997	-0.002178	-0.001932
3479.58	-0.002229	-0.002211	-0.001895	-0.002088	-0.001896	-0.002098	-0.002036	-0.001946	-0.002093	-0.002085	-0.002192	-0.00208
3481.51	-0.002186	-0.002179	-0.001987	-0.002142	-0.001928	-0.002064	-0.002053	-0.001971	-0.002212	-0.002124	-0.002125	-0.00231
3483.44	-0.002159	-0.002176	-0.002195	-0.002305	-0.002189	-0.002127	-0.002195	-0.002168	-0.002366	-0.002325	-0.002251	-0.002534
3485.37	-0.00202	-0.002133	-0.00229	-0.002273	-0.002372	-0.002079	-0.002175	-0.002241	-0.002346	-0.00233	-0.002273	-0.00245
3487.3	-0.001859	-0.001996	-0.002157	-0.00204	-0.002303	-0.001929	-0.001959	-0.002117	-0.00217	-0.002134	-0.002071	-0.002139
3489.23	-0.00183	-0.001944	-0.002033	-0.00189	-0.002119	-0.001932	-0.001942	-0.002055	-0.002101	-0.002068	-0.001961	-0.001971
3491.16	-0.001913	-0.002035	-0.002069	-0.001909	-0.002043	-0.002044	-0.002154	-0.001998	-0.002193	-0.00217	-0.002026	-0.002012
3493.09	-0.001969	-0.001995	-0.001996	-0.001906	-0.001923	-0.001996	-0.002152	-0.001876	-0.00214	-0.00204	-0.002011	-0.002012
3495.01	-0.001909	-0.001851	-0.001657	-0.001848	-0.001568	-0.001776	-0.001809	-0.00171	-0.001908	-0.001766	-0.001903	-0.001835
3496.94	-0.001948	-0.001824	-0.001292	-0.001871	-0.001231	-0.00163	-0.001522	-0.001607	-0.001696	-0.001722	-0.001797	-0.001674
3498.87	-0.00224	-0.00203	-0.001401	-0.002079	-0.001404	-0.001873	-0.001692	-0.001797	-0.001898	-0.002001	-0.002033	-0.00182
3500.8	-0.002362	-0.002128	-0.001815	-0.002221	-0.001916	-0.002161	-0.001969	-0.002002	-0.002162	-0.002239	-0.002271	-0.002088
3502.73	-0.002204	-0.00207	-0.002077	-0.002149	-0.002188	-0.002181	-0.002034	-0.002066	-0.002195	-0.002207	-0.00222	-0.002212
3504.66	-0.002145	-0.002147	-0.002334	-0.002179	-0.002436	-0.002262	-0.002222	-0.002202	-0.002441	-0.002251	-0.002286	-0.002333
3506.59	-0.002023	-0.002132	-0.002391	-0.002131	-0.002563	-0.002216	-0.002237	-0.002249	-0.002524	-0.002232	-0.002282	-0.00227
3508.52	-0.001789	-0.002041	-0.002164	-0.001997	-0.002335	-0.001996	-0.002038	-0.002119	-0.002345	-0.00216	-0.002121	-0.002076
3510.45	-0.001817	-0.002078	-0.002134	-0.00205	-0.002263	-0.001995	-0.002023	-0.002107	-0.002283	-0.002216	-0.002081	-0.002116
3512.37	-0.001961	-0.002134	-0.00232	-0.002153	-0.00248	-0.002173	-0.002181	-0.002217	-0.00236	-0.002247	-0.00217	-0.002327
3514.3	-0.001862	-0.001937	-0.002203	-0.001975	-0.002321	-0.001991	-0.002042	-0.001962	-0.00207	-0.001965	-0.001939	-0.002219
3516.23	-0.001814	-0.001719	-0.001666	-0.001639	-0.001582	-0.001582	-0.001624	-0.0015	-0.001591	-0.001566	-0.00152	-0.001748
3518.16	-0.002051	-0.001776	-0.001251	-0.001609	-0.001015	-0.001472	-0.001524	-0.001451	-0.001595	-0.001571	-0.001578	-0.001533
3520.09	-0.002141	-0.001797	-0.00105	-0.001628	-0.000807	-0.001418	-0.00143	-0.001583	-0.001628	-0.001668	-0.001765	-0.001511
3522.02	-0.002132	-0.001826	-0.001099	-0.0017	-0.000966	-0.001566	-0.00145	-0.001783	-0.001764	-0.001842	-0.001931	-0.001684
3523.95	-0.002177	-0.001989	-0.001542	-0.001944	-0.001652	-0.002	-0.001806	-0.002117	-0.00215	-0.00213	-0.002185	-0.002076
3525.88	-0.002189	-0.002198	-0.002225	-0.002292	-0.002616	-0.002515	-0.002394	-0.002461	-0.002582	-0.002488	-0.002442	-0.002464
3527.8	-0.001988	-0.002185	-0.002739	-0.002385	-0.003197	-0.002677	-0.002656	-0.002419	-0.002669	-0.002522	-0.002395	-0.002472
3529.73	-0.001752	-0.002001	-0.002575	-0.002108	-0.002877	-0.00233	-0.002319	-0.00201	-0.002285	-0.002117	-0.002022	-0.002097
3531.66	-0.001767	-0.001968	-0.002217	-0.002004	-0.002402	-0.002074	-0.002103	-0.001895	-0.002055	-0.001975	-0.001959	-0.001979
3533.59	-0.001783	-0.001938	-0.002012	-0.00195	-0.002153	-0.001892	-0.001967	-0.0019	-0.001954	-0.001998	-0.001999	-0.001971
3535.52	-0.001818	-0.001929	-0.001974	-0.00189	-0.002042	-0.001831	-0.001943	-0.001905	-0.001997	-0.0021	-0.002086	-0.001962
3537.45	-0.00182	-0.001848	-0.001852	-0.001767	-0.001826	-0.001688	-0.001715	-0.001768	-0.001929	-0.002001	-0.001991	-0.001796
3539.38	-0.001796	-0.001624	-0.001342	-0.001564	-0.001268	-0.001399	-0.001256	-0.001554	-0.001621	-0.001612	-0.001601	-0.001535
3541.31	-0.001979	-0.001611	-0.000966	-0.001518	-0.000914	-0.001375	-0.00118	-0.001589	-0.001529	-0.001417	-0.001524	-0.001562
3543.23	-0.002214	-0.001861	-0.001087	-0.001706	-0.001207	-0.001724	-0.0016	-0.001855	-0.001818	-0.001694	-0.001836	-0.001835
3545.16	-0.002246	-0.002062	-0.001608	-0.001961	-0.00189	-0.00212	-0.002049	-0.002079	-0.0022	-0.002106	-0.002115	-0.002086
3547.09	-0.002201	-0.002132	-0.002132	-0.002138	-0.002502	-0.002379	-0.002285	-0.002147	-0.002501	-0.002324	-0.00225	-0.002221
3549.02	-0.002016	-0.002112	-0.002452	-0.002189	-0.002837	-0.00244	-0.002341	-0.002102	-0.002561	-0.002336	-0.002231	-0.002269
3550.95	-0.001806	-0.001998	-0.002425	-0.00208	-0.002758	-0.002235	-0.002105	-0.001965	-0.002344	-0.002154	-0.002023	-0.002144
3552.88	-0.00174	-0.001901	-0.002181	-0.001952	-0.00244	-0.002004	-0.00197	-0.001979	-0.002112	-0.00205	-0.001951	-0.002065
3554.81	-0.001794	-0.001922	-0.002094	-0.001908	-0.002194	-0.001884	-0.002058	-0.002042	-0.002042	-0.002126	-0.002091	-0.002064
3556.74	-0.001792	-0.001839	-0.001921	-0.00174	-0.00183	-0.001687	-0.001907	-0.001815	-0.001909	-0.001997	-0.001987	-0.001806
3558.67	-0.001665	-0.001476	-0.001173	-0.001253	-0.000887	-0.001135	-0.001227	-0.001163	-0.001371	-0.001367	-0.00138	-0.00124
3560.59	-0.001894	-0.001235	-0.000108	-0.000963	0.000249	-0.000753	-0.000606	-0.000756	-0.000924	-0.000942	-0.000881	-0.000928
3562.52	-0.002375	-0.001555	-3.4e-05	-0.001324	3.3e-05	-0.001264	-0.001018	-0.001304	-0.001305	-0.001386	-0.001234	-0.001361
3564.45	-0.002581	-0.002039	-0.001013	-0.001895	-0.001389	-0.002131	-0.001891	-0.00214	-0.00209	-0.002142	-0.002008	-0.002021
3566.38	-0.00237	-0.002336	-0.002359	-0.002367	-0.00301	-0.002792	-0.002642	-0.002721	-0.002743	-0.002715	-0.002648	-0.002521
3568.31	-0.001943	-0.002399	-0.003372	-0.002539	-0.004002	-0.002982	-0.002928	-0.002834	-0.003017	-0.00282	-0.00286	-0.002659
3570.24	-0.001477	-0.002161	-0.003528	-0.002296	-0.003962	-0.002645	-0.002629	-0.002428	-0.002731	-0.002433	-0.002577	-0.002349
3572.17	-0.001147	-0.001651	-0.002618	-0.001723	-0.002801	-0.00188	-0.001823	-0.001668	-0.001926	-0.001722	-0.001844	-0.001756
3574.1	-0.001402	-0.001459	-0.001569	-0.001477	-0.001655	-0.001454	-0.001376	-0.001403	-0.001504	-0.001485	-0.001411	-0.001521
3576.02	-0.001807	-0.001719	-0.001484	-0.00167	-0.001743	-0.001681	-0.001822	-0.001729	-0.001804	-0.001821	-0.001636	-0.001798
3577.95	-0.001783	-0.00168	-0.001629	-0.001575	-0.001948	-0.001652	-0.001947	-0.001671	-0.001883	-0.001812	-0.001608	-0.001771
3579.88	-0.001584	-0.001282	-0.001196	-0.001175	-0.00129	-0.001148	-0.001367	-0.001248	-0.001432	-0.001326	-0.001132	-0.001366
3581.81	-0.001733	-0.001157	-0.000427	-0.000971	-0.000238	-0.000866	-0.000853	-0.001021	-0.001101	-0.000968	-0.000859	-0.001073
3583.74	-0.002027	-0.001444	-0.000419	-0.001289	-0.000287	-0.001279	-0.001133	-0.001318	-0.00142	-0.001248	-0.001295	-0.001253
3585.67	-0.00199	-0.001721	-0.001086	-0.001665	-0.001215	-0.001804	-0.001638	-0.001689	-0.001877	-0.001695	-0.001827	-0.001631
3587.6	-0.001794	-0.001885	-0.001824	-0.001805	-0.002195	-0.002062	-0.001916	-0.001939	-0.002117	-0.001984	-0.002048	-0.001901
3589.53	-0.001635	-0.001888	-0.00222	-0.001764	-0.002674	-0.002105	-0.00201	-0.001965	-0.002096	-0.002041	-0.002046	-0.001918
3591.46	-0.001469	-0.001606	-0.002	-0.001526	-0.002348	-0.001834	-0.001756	-0.001689	-0.001805	-0.001776	-0.001763	-0.001625
3593.38	-0.001445	-0.001294	-0.001303	-0.001244	-0.001452	-0.00134	-0.001263	-0.001311	-0.001404	-0.001359	-0.001299	-0.001272
3595.31	-0.001763	-0.001422	-0.001055	-0.001342	-0.00119	-0.001414	-0.001379	-0.001368	-0.00156	-0.001436	-0.001334	-0.001336
3597.24	-0.001768	-0.001611	-0.001577	-0.001597	-0.001972	-0.001767	-0.001927	-0.001651	-0.001977	-0.001806	-0.001705	-0.001588
3599.17	-0.001361	-0.001513	-0.00195	-0.001509	-0.002436	-0.001693	-0.001968	-0.001645	-0.001934	-0.001786	-0.001636	-0.001629
3601.1	-0.001166	-0.001318	-0.001648	-0.001209	-0.001975	-0.001414	-0.001486	-0.001449	-0.001554	-0.001413	-0.001294	-0.001487
3603.03	-0.001283	-0.001239	-0.001064	-0.001099	-0.001177	-0.001285	-0.001177	-0.001208	-0.001272	-0.00118	-0.00121	-0.001204
3604.96	-0.00137	-0.001147	-0.00068	-0.001096	-0.000643	-0.001162	-0.000984	-0.001017	-0.001126	-0.001116	-0.001218	-0.001047
3606.89	-0.001558	-0.001127	-0.000402	-0.001065	-0.000268	-0.001043	-0.000749	-0.000938	-0.000994	-0.001087	-0.001134	-0.001058
3608.81	-0.001773	-0.001281	-0.000462	-0.001194	-0.000387	-0.00122	-0.000996	-0.00112	-0.001134	-0.001282	-0.001248	-0.001144
3610.74	-0.0016	-0.001277	-0.000825	-0.001272	-0.000923	-0.001334	-0.001291	-0.001307	-0.001327	-0.001368	-0.001312	-0.001206
3612.67	-0.001396	-0.00118	-0.00098	-0.001182	-0.001118	-0.001272	-0.001131	-0.001371	-0.001285	-0.001134	-0.001089	-0.001226
3614.6	-0.001451	-0.001244	-0.001007	-0.001183	-0.001259	-0.001405	-0.001132	-0.001434	-0.001318	-0.001103	-0.001027	-0.001225
3616.53	-0.001394	-0.0014	-0.001467	-0.001339	-0.001995	-0.001715	-0.001627	-0.001589	-0.001657	-0.001487	-0.001339	-0.001364
3618.46	-0.001025	-0.00139	-0.002041	-0.001392	-0.002747	-0.001805	-0.001999	-0.001636	-0.001903	-0.001787	-0.001543	-0.001605
3620.39	-0.000698	-0.001128	-0.00198	-0.001164	-0.002577	-0.001476	-0.001893	-0.001402	-0.0017	-0.001637	-0.001426	-0.00155
3622.32	-0.000808	-0.000822	-0.001194	-0.000758	-0.001417	-0.000943	-0.001096	-0.001001	-0.001164	-0.001111	-0.001044	-0.001111
3624.25	-0.001258	-0.000803	-0.000354	-0.000608	-0.000349	-0.000725	-0.000409	-0.0007	-0.000783	-0.00075	-0.000818	-0.000687
3626.17	-0.001569	-0.000961	-6.2e-05	-0.000781	-7.5e-05	-0.000885	-0.00033	-0.000787	-0.000749	-0.00079	-0.000931	-0.000635
3628.1	-0.001439	-0.00116	-0.000584	-0.001134	-0.000948	-0.001354	-0.000986	-0.00116	-0.00117	-0.00128	-0.00131	-0.000903
3630.03	-0.000849	-0.001213	-0.001561	-0.001355	-0.002278	-0.001677	-0.001732	-0.00152	-0.001651	-0.001719	-0.00158	-0.001339
3631.96	-0.000342	-0.001123	-0.002198	-0.001349	-0.002935	-0.001615	-0.001998	-0.001551	-0.001802	-0.001776	-0.001455	-0.001569
3633.89	-0.000272	-0.000948	-0.002088	-0.001114	-0.002556	-0.001255	-0.001641	-0.00132	-0.001555	-0.001418	-0.001082	-0.001519
3635.82	-0.000661	-0.000905	-0.001388	-0.00088	-0.001526	-0.000911	-0.000965	-0.001028	-0.001142	-0.000957	-0.000767	-0.001237
3637.75	-0.000948	-0.00092	-0.00088	-0.00086	-0.000993	-0.000864	-0.000983	-0.000876	-0.000988	-0.000839	-0.00089	-0.000947
3639.68	-0.000782	-0.000637	-0.000527	-0.000672	-0.000606	-0.000681	-0.000867	-0.000732	-0.0008	-0.00069	-0.000949	-0.000813
3641.6	-0.00104	-0.000428	0.000337	-0.000358	0.000617	-0.000342	-0.000275	-0.000361	-0.000432	-0.000378	-0.000668	-0.000451
3643.53	-0.001843	-0.000476	0.001141	-0.000168	0.00183	-0.000122	0.000402	-0.000226	-0.000109	-3.4e-05	-0.000234	-0.000223
3645.46	-0.002286	-0.000818	0.001056	-0.000365	0.001721	-0.000383	0.000362	-0.000326	-0.000199	-0.00011	-4.9e-05	-0.000146
3647.39	-0.00174	-0.001039	2.8e-05	-0.000773	6.3e-05	-0.000898	-0.000454	-0.000713	-0.000678	-0.000617	-0.000432	-0.000409
3649.32	-0.000735	-0.001009	-0.001256	-0.001105	-0.001965	-0.001328	-0.001299	-0.001114	-0.001169	-0.001184	-0.000967	-0.000898
3651.25	8.2e-05	-0.000905	-0.002148	-0.001234	-0.003331	-0.0016	-0.001905	-0.001304	-0.001507	-0.001587	-0.001314	-0.001188
3653.18	0.000502	-0.000687	-0.002269	-0.001064	-0.00345	-0.001425	-0.001818	-0.001267	-0.001507	-0.001543	-0.001313	-0.001324
3655.11	0.000163	-0.000556	-0.001591	-0.000765	-0.002311	-0.000996	-0.001178	-0.001051	-0.001164	-0.001133	-0.001046	-0.001158
3657.04	-0.000324	-0.000598	-0.00112	-0.000649	-0.001504	-0.000849	-0.000795	-0.001039	-0.000981	-0.000863	-0.000869	-0.001033
3658.96	-0.000267	-0.000658	-0.001078	-0.000668	-0.001406	-0.000883	-0.000951	-0.000932	-0.001012	-0.000883	-0.000837	-0.000842
3660.89	-0.000102	-0.000513	-0.000977	-0.000563	-0.001259	-0.000745	-0.000996	-0.000744	-0.000943	-0.000848	-0.000836	-0.00073
3662.82	-0.000603	-0.000414	-0.000413	-0.000363	-0.000321	-0.000432	-0.000448	-0.000514	-0.000592	-0.000513	-0.000576	-0.00073
3664.75	-0.001432	-0.000452	0.000493	-0.000145	0.001058	-0.000127	2.3e-05	-2.5e-05	-0.000145	-0.000107	-0.000173	-0.000173
3666.68	-0.001587	-0.000349	0.000818	-2.9e-05	0.001378	-7e-06	3e-05	0.000147	-6.3e-05	3.5e-05	-0.000168	0.000144
3668.61	-0.001504	-0.000302	0.000769	-0.000108	0.001073	-8.3e-05	0.000181	-7.9e-05	-0.000144	-1.5e-05	-0.000284	2.1e-05
3670.54	-0.00129	-0.000403	0.000643	-0.000264	0.000699	-0.000287	0.000221	-0.000228	-0.000247	-0.000104	-0.000235	4.6e-05
3672.47	-0.000697	-0.000488	0.000121	-0.000447	-0.000157	-0.000512	-8.2e-05	-0.000428	-0.000424	-0.000293	-0.000229	-0.00012
3674.39	-0.000121	-0.000523	-0.000634	-0.000598	-0.001143	-0.000733	-0.000517	-0.000681	-0.000646	-0.000579	-0.000402	-0.000448
3676.32	0.00022	-0.000526	-0.001266	-0.000659	-0.0018	-0.000845	-0.000914	-0.00087	-0.000802	-0.000791	-0.000592	-0.000795
3678.25	0.000519	-0.00046	-0.00162	-0.000612	-0.002131	-0.000898	-0.001391	-0.000771	-0.000904	-0.00096	-0.000714	-0.000742
3680.18	0.00069	-0.000295	-0.001748	-0.000477	-0.002254	-0.000859	-0.001497	-0.000814	-0.000974	-0.001021	-0.000874	-0.000915
3682.11	-0.000103	-0.000309	-0.001002	-0.000283	-0.001116	-0.000524	-0.000687	-0.000653	-0.000643	-0.000662	-0.00058	-0.000862
3684.04	-0.001167	-0.000412	0.000252	1.6e-05	0.000728	-0.000125	0.000144	-0.000143	-9.1e-05	-3.5e-05	-1.6e-05	-0.000138
3685.97	-0.001412	-0.000385	0.00083	0.000148	0.001368	5.4e-05	0.000445	6.5e-05	0.000168	0.000274	0.000217	0.000266
3687.9	-0.000918	-0.000275	0.00061	4.1e-05	0.000759	-4.1e-05	0.000194	6e-06	6.7e-05	0.000135	8.7e-05	0.000309
3689.83	3.2e-05	-9.7e-05	-0.000109	-0.000187	-0.000509	-0.000239	-0.00034	-0.000259	-0.000244	-0.000211	-0.000225	-6.8e-05
3691.75	0.000869	2.6e-05	-0.000799	-0.000347	-0.001589	-0.000461	-0.000796	-0.000424	-0.000561	-0.000573	-0.000493	-0.000434
3693.68	0.001044	1.9e-05	-0.001113	-0.00038	-0.001958	-0.000571	-0.000901	-0.000538	-0.000722	-0.000749	-0.000673	-0.000748
3695.61	0.000364	-9.8e-05	-0.0007	-0.000269	-0.001182	-0.000376	-0.000473	-0.000472	-0.000553	-0.000502	-0.000468	-0.000677
3697.54	-0.00033	-0.000191	-9.2e-05	-3.8e-05	-0.000122	-0.000134	-7.5e-05	-0.000243	-0.000192	-0.000148	-0.000113	-0.000184
3699.47	-0.000426	-0.000195	-5e-06	3.5e-05	7.4e-05	-6.6e-05	-5.1e-05	-0.000118	-8.2e-05	-6.9e-05	-3.7e-05	4.2e-05
3701.4	-0.000278	-0.000162	-0.000188	-1.5e-05	-0.000107	-3.1e-05	-0.000167	-6.3e-05	-0.000182	-0.000126	-0.000117	-3e-06
3703.33	-0.000272	-0.000157	-0.00016	-5.2e-05	7e-05	0	-0.000148	-5e-06	-0.00021	-0.000114	-0.000213	-0.000101
3705.26	-0.000578	-0.000117	0.000382	3.5e-05	0.000913	0.000101	0.000274	0.000137	6.3e-05	0.000124	-0.000123	4e-05
3707.18	-0.000774	-2.9e-05	0.000955	8.7e-05	0.001515	0.000245	0.000626	0.000199	0.000405	0.000368	0.000144	0.000217
3709.11	-0.00047	5.1e-05	0.000989	2.5e-05	0.001273	0.00022	0.000542	0.000151	0.000479	0.000394	0.000355	0.00032
3711.04	0.000204	4.6e-05	0.000197	-0.000121	5.2e-05	-8.8e-05	1e-06	-7.5e-05	0.000178	4.6e-05	0.00017	0.000117
3712.97	0.00068	-2.5e-05	-0.000691	-0.000233	-0.001215	-0.000378	-0.000542	-0.000263	-0.000357	-0.000376	-0.00021	-0.000244
3714.9	0.000639	-0.000107	-0.001028	-0.000247	-0.001593	-0.000435	-0.000671	-0.000288	-0.000668	-0.000574	-0.000457	-0.000485
3716.83	4.8e-05	-9.5e-05	-0.000469	-5.6e-05	-0.000624	-0.000166	-0.000271	-3.5e-05	-0.000365	-0.000361	-0.000369	-0.00035
3718.76	-0.000499	4.1e-05	0.000521	0.00023	0.000812	0.000306	0.000351	0.000246	0.000204	0.000125	2.1e-05	3.7e-05
3720.69	-0.000464	0.000122	0.000987	0.000377	0.001339	0.000555	0.000447	0.000342	0.000514	0.000432	0.000361	0.000339
3722.61	-8.6e-05	0.000131	0.000634	0.000335	0.000767	0.000377	3.6e-05	0.000182	0.000315	0.000371	0.000274	0.000367
3724.54	0.000111	4e-06	-0.000243	8.7e-05	-0.000303	-8.4e-05	-0.00043	-0.00022	-0.000209	1.1e-05	-0.000114	3.7e-05
3726.47	-0.000158	-0.000195	-0.000706	-0.000104	-0.000694	-0.000437	-0.000582	-0.000339	-0.0005	-0.000281	-0.000382	-0.00021
3728.4	-0.000655	-0.000212	-0.00022	-0.000138	6e-06	-0.000322	-0.000117	-0.000168	-0.000222	-0.000252	-0.000385	-0.000344
3730.33	-0.001056	3e-06	0.001003	-1.1e-05	0.001484	0.000208	0.000635	0.000284	0.000402	0.000177	0.000104	2.1e-05
3732.26	-0.000912	0.000197	0.001538	9.7e-05	0.002019	0.000535	0.000904	0.000461	0.000661	0.000496	0.000494	0.000368
3734.19	-0.000297	0.000194	0.001015	8.3e-05	0.001311	0.000458	0.000535	0.000409	0.000461	0.000405	0.000526	0.000576
3736.12	0.000453	8.4e-05	-0.000193	-0.000116	-0.000253	7.2e-05	-0.000212	5.5e-05	-0.000185	-9.8e-05	8e-05	0.000234
3738.05	0.000584	-0.000207	-0.001195	-0.000407	-0.001419	-0.000415	-0.000467	-0.00037	-0.000681	-0.000506	-0.00035	-0.000477
3739.97	0.000127	-0.000289	-0.000861	-0.000298	-0.000877	-0.000409	-0.000249	-0.000195	-0.0004	-0.000387	-0.000306	-0.000344
3741.9	-0.000325	-0.000135	3.8e-05	-7.7e-05	0.000217	-3.5e-05	7.8e-05	6.5e-05	4.3e-05	-6.1e-05	-0.000184	-5.9e-05
3743.83	-0.000838	-8.6e-05	0.000678	9.3e-05	0.001195	0.000196	0.000496	0.000282	0.000362	0.000288	9.1e-05	0.000308
3745.76	-0.000987	-5.4e-05	0.000762	0.000224	0.001466	0.000227	0.000643	0.000313	0.00057	0.000507	0.000293	0.000576
3747.69	-0.000429	-3.3e-05	0.000371	0.000162	0.000764	0.000109	0.000347	0.000204	0.000454	0.000366	0.000274	0.000632
3749.62	0.000385	-2.3e-05	-0.00037	-8.1e-05	-0.000657	-0.000216	-0.000231	-0.000144	-1.8e-05	-7.3e-05	3e-05	0.000164
3751.55	0.000877	-4.8e-05	-0.000931	-0.000311	-0.001679	-0.000467	-0.000601	-0.00043	-0.000437	-0.000399	-0.000128	-0.000358
3753.48	0.00104	-4e-06	-0.000942	-0.00034	-0.001776	-0.000376	-0.000763	-0.000431	-0.000564	-0.000502	-0.000194	-0.000477
3755.4	0.000888	-5.9e-05	-0.000982	-0.000379	-0.001752	-0.000334	-0.00077	-0.000434	-0.000637	-0.000588	-0.000365	-0.000698
3757.33	0.000462	-8.6e-05	-0.000768	-0.000313	-0.001315	-0.000298	-0.000423	-0.00041	-0.000468	-0.00047	-0.000314	-0.000709
3759.26	0.000237	-2.5e-05	-0.000356	-0.000196	-0.000664	-0.00019	-0.00019	-0.000233	-0.000183	-0.000209	-0.000107	-0.000373
3761.19	0.00031	0	-0.000269	-6.6e-05	-0.000432	-0.000179	-0.000257	-8.3e-05	-0.000139	-0.000148	-0.000118	-6.9e-05
3763.12	0.000152	7e-06	-0.000247	3.3e-05	-0.000238	-0.000158	-0.000103	-0.000129	-0.00012	-7.1e-05	-0.000121	-0.000136
3765.05	-0.000107	1.2e-05	2.7e-05	8.6e-05	0.000145	-8e-06	0.000193	-5e-05	1.5e-05	0.00011	8.6e-05	-3.9e-05
3766.98	-5.6e-05	3.1e-05	0.000127	3.5e-05	4.7e-05	5.8e-05	0.000181	1.4e-05	7.3e-05	0.000108	0.000185	0.000112
3768.91	0.000265	2.6e-05	-0.000217	-0.00011	-0.000606	-8.9e-05	-0.000203	-3.9e-05	-0.000109	-0.000159	4.4e-05	6.5e-05
3770.84	0.00047	-5e-06	-0.000578	-0.00022	-0.001087	-0.00025	-0.000448	-0.000171	-0.000372	-0.000381	-0.000198	-0.000223
3772.76	0.000204	-9.3e-05	-0.000546	-0.00021	-0.000788	-0.000261	-0.000313	-0.000158	-0.000394	-0.000264	-0.000296	-0.000282
3774.69	-0.000118	-7.5e-05	-0.000239	-3.6e-05	-0.000124	-9.2e-05	-7.5e-05	-9e-06	-0.000164	-2.5e-05	-0.00028	-3e-05
3776.62	-0.000289	-2.6e-05	3e-05	4.6e-05	0.000286	3.6e-05	0.000124	2.8e-05	7.6e-05	0.000105	-0.00016	2.4e-05
3778.55	-0.000268	3.5e-05	0.000309	6.2e-05	0.000547	0.000126	0.000209	6.7e-05	0.00021	0.000185	9.2e-05	0.000158
3780.48	-3.2e-05	0.000107	0.000332	3e-05	0.00038	0.000153	0.000158	3e-05	0.000178	0.000147	0.000229	0.000182
3782.41	0.000211	7.9e-05	9e-05	-2.6e-05	-7.2e-05	3.4e-05	3.4e-05	-4.3e-05	2.1e-05	2e-05	0.000213	9.3e-05
3784.34	0.000318	1.5e-05	-0.000209	-3.7e-05	-0.000484	-7.5e-05	-8.7e-05	-0.000149	-0.000135	-6.1e-05	4.9e-05	-9.2e-05
3786.27	0.000258	-2.4e-05	-0.000361	-2.3e-05	-0.000579	-0.000101	-0.000193	-0.000159	-0.000189	-0.000117	-9.2e-05	-0.000149
3788.19	0.000227	-3e-05	-0.00045	1.1e-05	-0.000522	-0.000142	-0.000337	-0.000115	-0.000213	-0.000243	-0.000239	-0.000173
3790.12	-6.8e-05	-0.000105	-0.000357	1e-05	-0.000166	-0.00014	-0.000213	-0.000135	-0.00017	-0.000195	-0.000303	-0.000291
3792.05	-0.000514	-8.4e-05	0.000275	8.9e-05	0.00079	8.7e-05	0.000135	0.000156	6.4e-05	0.000123	-6.8e-05	0.000136
3793.98	-0.000776	1.4e-05	0.000725	0.000134	0.001332	0.000252	0.000418	0.000316	0.00023	0.000339	7.8e-05	0.000307
3795.91	-0.001062	-3.5e-05	0.001002	0.000171	0.001706	0.000312	0.000726	0.000463	0.000399	0.000466	0.000324	0.00041
3797.84	-0.000853	1.4e-05	0.000968	0.000242	0.001491	0.000325	0.000594	0.000525	0.000487	0.000393	0.000452	0.000537
3799.77	-0.000349	3.5e-05	0.000425	0.000143	0.000546	0.000119	0.000244	0.000286	0.000365	8.2e-05	0.000279	0.000185
3801.7	6.7e-05	-5.9e-05	-0.000186	-1.4e-05	-0.000361	-9.8e-05	-4.2e-05	2.4e-05	0.000132	-0.000134	3.5e-05	-8.7e-05
3803.63	0.000508	-7.8e-05	-0.000585	-9.3e-05	-0.000997	-0.000185	-0.000353	-0.000187	-0.000121	-0.000182	-0.00018	-0.000148
3805.55	0.000912	4.1e-05	-0.000744	-0.000141	-0.001374	-0.000233	-0.000654	-0.000262	-0.000359	-0.000234	-0.000283	-0.000147
3807.48	0.000878	0.000146	-0.000803	-0.000177	-0.001436	-0.000256	-0.00067	-0.000457	-0.000546	-0.000316	-0.000383	-0.000408
3809.41	0.000194	9.1e-05	-0.000405	-9.5e-05	-0.000609	-0.00014	-0.000272	-0.000365	-0.000397	-0.000188	-0.000193	-0.000313
3811.34	-0.000347	0.000123	0.000216	7.9e-05	0.000453	7.5e-05	-9e-06	5.7e-05	-2.3e-05	1e-06	4.2e-05	0.00013
3813.27	-0.000755	0.000111	0.000679	0.000135	0.001239	0.00022	0.000392	0.000262	0.000323	0.000224	0.000101	0.000114
3815.2	-0.001071	-4.2e-05	0.001136	0.000164	0.001956	0.000349	0.000951	0.000506	0.000697	0.000598	0.000361	0.000408
3817.13	-0.000617	-6e-05	0.001082	0.000201	0.001638	0.000385	0.000849	0.000523	0.000717	0.000641	0.00048	0.00061
3819.06	0.000104	-4e-06	0.000466	0.000125	0.00042	0.000224	0.000382	0.000184	0.000344	0.000309	0.000327	0.00031
3820.98	0.000506	4.5e-05	-0.000216	3e-05	-0.000681	-1.7e-05	-7.7e-05	-0.000188	-0.000104	-4.9e-05	7.5e-05	-3.7e-05
3822.91	0.000617	6.6e-05	-0.000624	-4.1e-05	-0.00122	-0.000171	-0.000446	-0.000306	-0.000407	-0.000282	-0.000122	-0.000207
[truncated: 92 more rows]
